# Supplementary material for: Quantitating primer-template interactions using deconstructed PCR
Source: PeerJ journal article supplement (doi:10.7717/peerj.17787), 2024-08-08
Supplement: Figs_S17to_18.pdf [file Figs_S17to_18.pdf]

**Figures S17-18. Effect of PCR methodology and annealing temperature on template profiles in amplification reactions utilizing varying primer pools.** One-way clustered heatmaps of untransformed template utilization profiling during amplification of an uneven pooling of synthetic DNA templates and varying primer pools (Figure S17 = C1, C2 and C3 experiments with all ten templates present, and template ST1 at 1/10th the concentration of the other nine templates; Figure S18 = D1, D2, E1 and E2 experiments with four templates). For experiments C1, D1 and E1, only a single primer variant was used (806F\_v1), while in experiments C2, D2 and E2, 10 primers were used. In experiment C3, 9 primers were used (806F\_v1 was removed). Primer and template details are shown in Table 1. Samples (columns) are color-coded by amplification method (TAS or DePCR), amplification annealing temperature (45°C or 55°C), and average Ideal score. Each column represents the average of 7-8 technical replicates per condition and rarefaction to 7,000 sequences/replicate. Templates (rows) represent all 10 templates (ordered from top to bottom; ST1, ST4, ST6, ST7, ST8, ST11, ST15, ST23, ST39, and ST55). Ideal score comparisons between TAS and DePCR (across both annealing temperatures), within TAS (45°C or 55°C), and within DePCR (45°C or 55°C) are shown in tables. Asterisks indicate significant differences in measured values by annealing temperature (ANOVA,  $P < 0.01$ ). Intensity scales vary between experiments.

Fig. S17

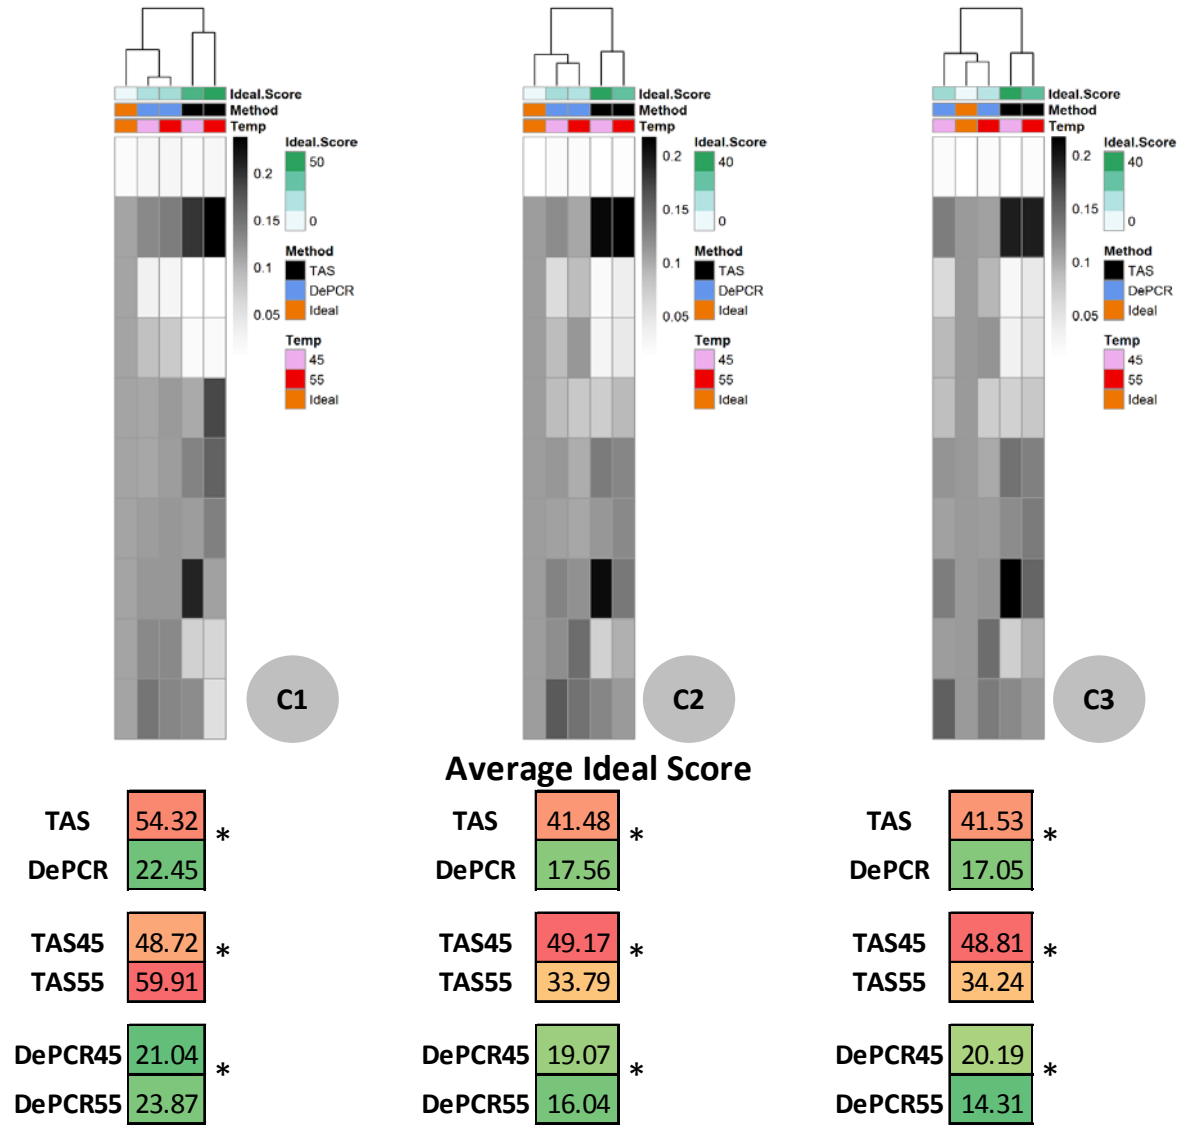

Fig. S18

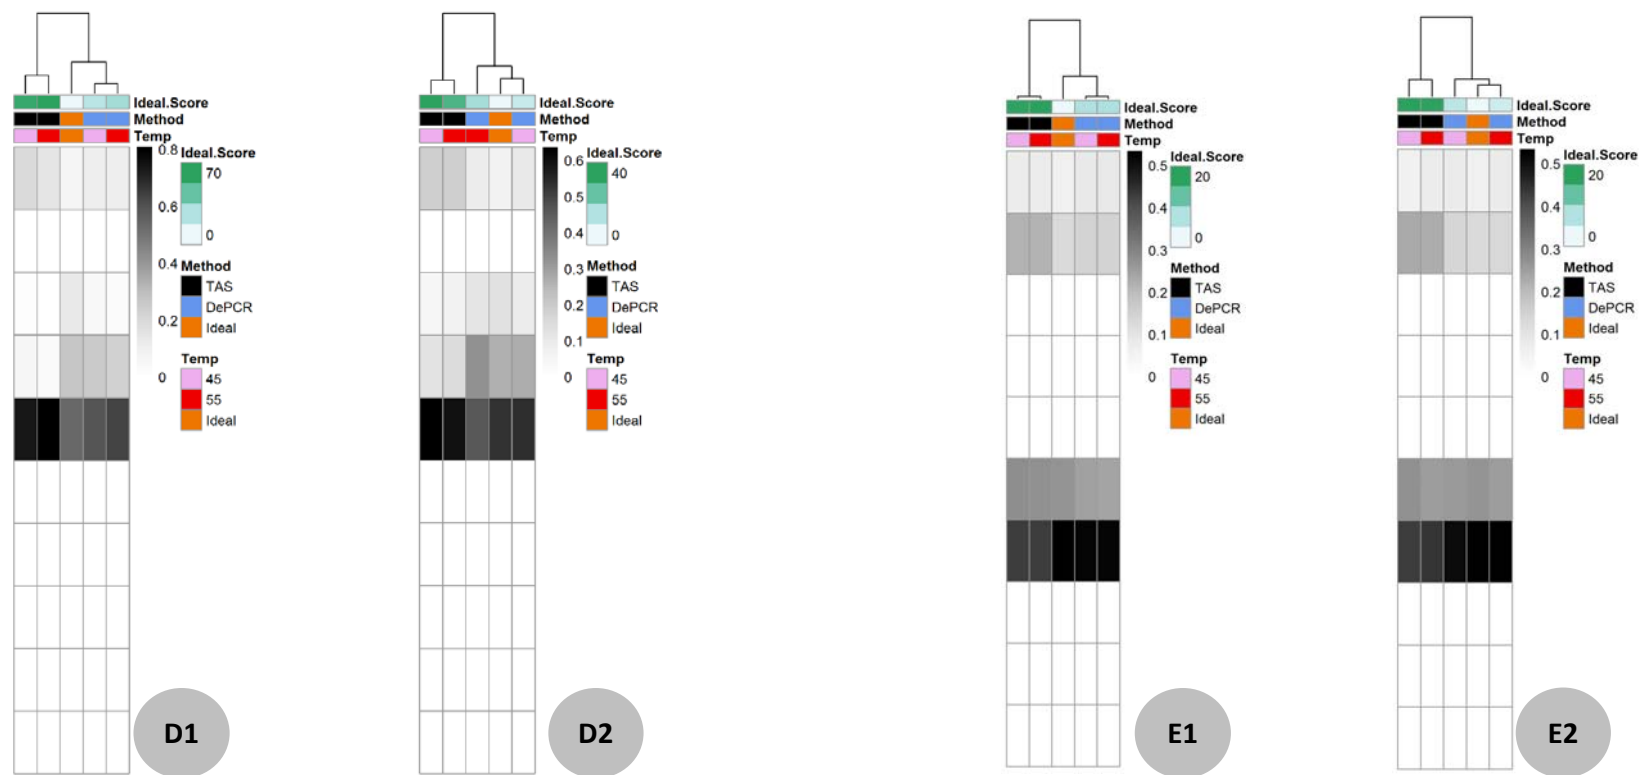

**Average Ideal Score**

|         |         |         |         |
|---------|---------|---------|---------|
| TAS     | 68.46 * | TAS     | 41.16 * |
| DePCR   | 24.27   | DePCR   | 13.23   |
| TAS45   | 65.95 * | TAS45   | 45.17 * |
| TAS55   | 70.96   | TAS55   | 36.58   |
| DePCR45 | 20.15 * | DePCR45 | 9.53 *  |
| DePCR55 | 27.87   | DePCR55 | 17.45   |

**Average Ideal Score**

|         |         |         |         |
|---------|---------|---------|---------|
| TAS     | 20.53 * | TAS     | 21.50 * |
| DePCR   | 7.30    | DePCR   | 4.91    |
| TAS45   | 20.28   | TAS45   | 21.66   |
| TAS55   | 20.78   | TAS55   | 21.35   |
| DePCR45 | 7.11    | DePCR45 | 5.95 *  |
| DePCR55 | 7.47    | DePCR55 | 3.87    |
