# Supplementary material for: Quantitating primer-template interactions using deconstructed PCR
Source: PeerJ journal article supplement (doi:10.7717/peerj.17787), 2024-08-08
Supplement: MaterialS3.zip [file MaterialS3.zip]

## Sheet: combined_data_new_submission
SampleID	SRS_number	SRA_number	study	bioproject_accession	accession (unique)	biosample_accession	original_Exp_name	current_Exp_name	PCR	Temp	Enz	group	Rpl	file_name	SampleID	SRS Number	SRA Number	SRA Sample Name	Current Exp Name	Initial Exp Name	PCR Method	Enz	Annealing Temp	group	Rpl	Barcode Name	Barcode Sequence	Input DNA Template	gDNA Conc (ng/ul)	Raw Reads	Merged Reads	Trimmed	Rarefaction	Mismatch Ratio	Shannon	Ideal Score	Primer Ideal Score	file_name	study	bioproject_accession	accession (unique)	biosample_accession
A1-45-1	SRS4213451	214644436					A1	A01	DePCR	45C	MT	A	1	A01_DePCR_45C_MT_A_1_.fastq	A1-45-1	SRS4213451	214644436	214644436_Ankur001-A1-45-1_S1	A01	A1	DePCR	MT	45C	A	1	FLD0001	GTATCGTCGT	A	2.5	28286	27923	22817	7000	0	0.281753	0.0857143	0	A01_DePCR_45C_MT_A_1_.fastq
A1-45-2	SRS4213368	214656448					A1	A01	DePCR	45C	MT	A	2	A01_DePCR_45C_MT_A_2_.fastq	A1-45-2	SRS4213368	214656448	214656448_Ankur002-A1-45-2_S2	A01	A1	DePCR	MT	45C	A	2	FLD0002	GTGTATGCGT	A	2.5	27630	27230	22095	7000	0	0.244679	0.171429	0	A01_DePCR_45C_MT_A_2_.fastq
A1-45-3	SRS4213453	214657444					A1	A01	DePCR	45C	MT	A	3	A01_DePCR_45C_MT_A_3_.fastq	A1-45-3	SRS4213453	214657444	214657444_Ankur003-A1-45-3_S3	A01	A1	DePCR	MT	45C	A	3	FLD0003	TGCTCGTAGT	A	2.5	21137	20852	16965	7000	0	0.250583	0.228571	0	A01_DePCR_45C_MT_A_3_.fastq
A1-45-4	SRS4213452	214639438					A1	A01	DePCR	45C	MT	A	4	A01_DePCR_45C_MT_A_4_.fastq	A1-45-4	SRS4213452	214639438	214639438_Ankur004-A1-45-4_S4	A01	A1	DePCR	MT	45C	A	4	FLD0004	GTCGTCGTCT	A	2.5	22604	22264	18145	7000	0	0.236653	0.0571429	0	A01_DePCR_45C_MT_A_4_.fastq
A1-45-5	SRS4213447	214639439					A1	A01	DePCR	45C	MT	A	5	A01_DePCR_45C_MT_A_5_.fastq	A1-45-5	SRS4213447	214639439	214639439_Ankur005-A1-45-5_S5	A01	A1	DePCR	MT	45C	A	5	FLD0005	GTGCGTGTGT	A	2.5	27497	27071	21900	7000	0	0.311902	0.285714	0	A01_DePCR_45C_MT_A_5_.fastq
A1-45-6	SRS4213446	214639440					A1	A01	DePCR	45C	MT	A	6	A01_DePCR_45C_MT_A_6_.fastq	A1-45-6	SRS4213446	214639440	214639440_Ankur006-A1-45-6_S6	A01	A1	DePCR	MT	45C	A	6	FLD0006	GCGTCGTGTA	A	2.5	30594	30146	24423	7000	0	0.224159	0.0285714	0	A01_DePCR_45C_MT_A_6_.fastq
A1-45-7	SRS4213449	214651443					A1	A01	DePCR	45C	MT	A	7	A01_DePCR_45C_MT_A_7_.fastq	A1-45-7	SRS4213449	214651443	214651443_Ankur007-A1-45-7_S7	A01	A1	DePCR	MT	45C	A	7	FLD0007	GTCGTGTACT	A	2.5	24900	24532	19854	7000	0	0.228549	0.2	0	A01_DePCR_45C_MT_A_7_.fastq
A1-45-8	SRS4213448	214645438					A1	A01	DePCR	45C	MT	A	8	A01_DePCR_45C_MT_A_8_.fastq	A1-45-8	SRS4213448	214645438	214645438_Ankur008-A1-45-8_S8	A01	A1	DePCR	MT	45C	A	8	FLD0008	GATGTAGCGT	A	2.5	24892	24537	19878	7000	0	0.265349	0.114286	0	A01_DePCR_45C_MT_A_8_.fastq
A1-55-1	SRS4213374	214653458					A1	A01	DePCR	55C	MT	A	1	A01_DePCR_55C_MT_A_1_.fastq	A1-55-1	SRS4213374	214653458	214653458_Ankur129-A1-55-1_S129	A01	A1	DePCR	MT	55C	A	1	FLD0193	TTGTTGCTGT	A	2.5	26736	26383	21328	7000	0	0.261455	0.285714	0	A01_DePCR_55C_MT_A_1_.fastq
A1-55-2	SRS4213373	214651458					A1	A01	DePCR	55C	MT	A	2	A01_DePCR_55C_MT_A_2_.fastq	A1-55-2	SRS4213373	214651458	214651458_Ankur130-A1-55-2_S130	A01	A1	DePCR	MT	55C	A	2	FLD0194	GTGTGGTTGT	A	2.5	28474	28050	22900	7000	0	0.25637	0.285714	0	A01_DePCR_55C_MT_A_2_.fastq
A1-55-3	SRS4213695	214662464					A1	A01	DePCR	55C	MT	A	3	A01_DePCR_55C_MT_A_3_.fastq	A1-55-3	SRS4213695	214662464	214662464_Ankur131-A1-55-3_S131	A01	A1	DePCR	MT	55C	A	3	FLD0195	TAGGTGGAAT	A	2.5	22295	21994	17833	7000	0	0.258671	0.114286	0	A01_DePCR_55C_MT_A_3_.fastq
A1-55-4	SRS4213694	214644447					A1	A01	DePCR	55C	MT	A	4	A01_DePCR_55C_MT_A_4_.fastq	A1-55-4	SRS4213694	214644447	214644447_Ankur132-A1-55-4_S132	A01	A1	DePCR	MT	55C	A	4	FLD0196	TGTAGGTGGA	A	2.5	25461	25125	20214	7000	0	0.26958	0.314286	0	A01_DePCR_55C_MT_A_4_.fastq
A1-55-5	SRS4213697	214644448					A1	A01	DePCR	55C	MT	A	5	A01_DePCR_55C_MT_A_5_.fastq	A1-55-5	SRS4213697	214644448	214644448_Ankur133-A1-55-5_S133	A01	A1	DePCR	MT	55C	A	5	FLD0197	TTAGTGGTGA	A	2.5	22265	21955	17755	7000	0	0.304065	0.142857	0	A01_DePCR_55C_MT_A_5_.fastq
A1-55-6	SRS4213696	214644449					A1	A01	DePCR	55C	MT	A	6	A01_DePCR_55C_MT_A_6_.fastq	A1-55-6	SRS4213696	214644449	214644449_Ankur134-A1-55-6_S134	A01	A1	DePCR	MT	55C	A	6	FLD0198	GTGAAGGTAA	A	2.5	31800	31385	25576	7000	0	0.286116	0.342857	0	A01_DePCR_55C_MT_A_6_.fastq
A1-55-7	SRS4213691	214661471					A1	A01	DePCR	55C	MT	A	7	A01_DePCR_55C_MT_A_7_.fastq	A1-55-7	SRS4213691	214661471	214661471_Ankur135-A1-55-7_S135	A01	A1	DePCR	MT	55C	A	7	FLD0199	TGTTGTGGTA	A	2.5	22893	22595	18527	7000	0	0.260888	0	0	A01_DePCR_55C_MT_A_7_.fastq
A1-55-8	SRS4213690	214645450					A1	A01	DePCR	55C	MT	A	8	A01_DePCR_55C_MT_A_8_.fastq	A1-55-8	SRS4213690	214645450	214645450_Ankur136-A1-55-8_S136	A01	A1	DePCR	MT	55C	A	8	FLD0200	GTTGATGAGT	A	2.5	36120	35654	29575	7000	0	0.234316	0.0857143	0	A01_DePCR_55C_MT_A_8_.fastq
A1S-45-1	SRS4213364	217235192					A1	A01	TAS	45C	MT	A	1	A01_TAS_45C_MT_A_1_.fastq	A1S-45-1	SRS4213364	217235192	217235192_Ankur001-A1S-45-1_S1	A01	A1	TAS	MT	45C	A	1	FLD0097	TGCTACATCA	A	2.5	21162	21069	18928	7000	0	0.0741696	0.0285714	0	A01_TAS_45C_MT_A_1_.fastq
A1S-45-2	SRS4213365	217243134					A1	A01	TAS	45C	MT	A	2	A01_TAS_45C_MT_A_2_.fastq	A1S-45-2	SRS4213365	217243134	217243134_Ankur002-A1S-45-2_S2	A01	A1	TAS	MT	45C	A	2	FLD0098	AGTGTGTCTA	A	2.5	23554	23455	21071	7000	0	0.0925725	0.0571429	0	A01_TAS_45C_MT_A_2_.fastq
A1S-45-3	SRS4213369	217246043					A1	A01	TAS	45C	MT	A	3	A01_TAS_45C_MT_A_3_.fastq	A1S-45-3	SRS4213369	217246043	217246043_Ankur003-A1S-45-3_S3	A01	A1	TAS	MT	45C	A	3	FLD0099	TCATATCGCG	A	2.5	18339	18241	16218	7000	0	0.0777361	0.0571429	0	A01_TAS_45C_MT_A_3_.fastq
A1S-45-4	SRS4213370	217235194					A1	A01	TAS	45C	MT	A	4	A01_TAS_45C_MT_A_4_.fastq	A1S-45-4	SRS4213370	217235194	217235194_Ankur004-A1S-45-4_S4	A01	A1	TAS	MT	45C	A	4	FLD0100	TACGTATAGC	A	2.5	18628	18518	16500	7000	0	0.0944414	0.0285714	0	A01_TAS_45C_MT_A_4_.fastq
A1S-45-5	SRS4213299	217230264					A1	A01	TAS	45C	MT	A	5	A01_TAS_45C_MT_A_5_.fastq	A1S-45-5	SRS4213299	217230264	217230264_Ankur005-A1S-45-5_S5	A01	A1	TAS	MT	45C	A	5	FLD0101	CAGCTATAGC	A	2.5	20856	20753	18500	7000	0	0.0941205	0.0857143	0	A01_TAS_45C_MT_A_5_.fastq
A1S-45-6	SRS4213298	217236201					A1	A01	TAS	45C	MT	A	6	A01_TAS_45C_MT_A_6_.fastq	A1S-45-6	SRS4213298	217236201	217236201_Ankur006-A1S-45-6_S6	A01	A1	TAS	MT	45C	A	6	FLD0102	TCGATGCGCT	A	2.5	20893	20803	18596	7000	0	0.0703296	0.114286	0	A01_TAS_45C_MT_A_6_.fastq
A1S-45-7	SRS4213297	217242129					A1	A01	TAS	45C	MT	A	7	A01_TAS_45C_MT_A_7_.fastq	A1S-45-7	SRS4213297	217242129	217242129_Ankur007-A1S-45-7_S7	A01	A1	TAS	MT	45C	A	7	FLD0103	GCACGCGTAT	A	2.5	20679	20561	18366	7000	0	0.0878397	0	0	A01_TAS_45C_MT_A_7_.fastq
A1S-45-8	SRS4213296	217228282					A1	A01	TAS	45C	MT	A	8	A01_TAS_45C_MT_A_8_.fastq	A1S-45-8	SRS4213296	217228282	217228282_Ankur008-A1S-45-8_S8	A01	A1	TAS	MT	45C	A	8	FLD0104	GCAGTATGCG	A	2.5	20538	20430	18104	7000	0	0.0805687	0	0	A01_TAS_45C_MT_A_8_.fastq
A1S-55-1	SRS4213303	217236213					A1	A01	TAS	55C	MT	A	1	A01_TAS_55C_MT_A_1_.fastq	A1S-55-1	SRS4213303	217236213	217236213_Ankur041-A1S-55-1_S41	A01	A1	TAS	MT	55C	A	1	FLD0137	ACGTATCATC	A	2.5	21705	21594	19334	7000	0	0.102783	0.114286	0	A01_TAS_55C_MT_A_1_.fastq
A1S-55-2	SRS4213301	217244131					A1	A01	TAS	55C	MT	A	2	A01_TAS_55C_MT_A_2_.fastq	A1S-55-2	SRS4213301	217244131	217244131_Ankur042-A1S-55-2_S42	A01	A1	TAS	MT	55C	A	2	FLD0138	AGTATCGTAC	A	2.5	22729	22606	20223	7000	0	0.103607	0.0285714	0	A01_TAS_55C_MT_A_2_.fastq
A1S-55-3	SRS4213302	217245129					A1	A01	TAS	55C	MT	A	3	A01_TAS_55C_MT_A_3_.fastq	A1S-55-3	SRS4213302	217245129	217245129_Ankur043-A1S-55-3_S43	A01	A1	TAS	MT	55C	A	3	FLD0139	GATACACTGA	A	2.5	20035	19943	17919	7000	0	0.0842465	0.114286	0	A01_TAS_55C_MT_A_3_.fastq
A1S-55-4	SRS4213300	217236214					A1	A01	TAS	55C	MT	A	4	A01_TAS_55C_MT_A_4_.fastq	A1S-55-4	SRS4213300	217236214	217236214_Ankur044-A1S-55-4_S44	A01	A1	TAS	MT	55C	A	4	FLD0140	GACTAGTCAG	A	2.5	20468	20364	18236	7000	0	0.0761771	0.0857143	0	A01_TAS_55C_MT_A_4_.fastq
A1S-55-5	SRS4213295	217232229					A1	A01	TAS	55C	MT	A	5	A01_TAS_55C_MT_A_5_.fastq	A1S-55-5	SRS4213295	217232229	217232229_Ankur045-A1S-55-5_S45	A01	A1	TAS	MT	55C	A	5	FLD0141	GATGACTACG	A	2.5	19739	19639	17553	7000	0	0.0797999	0	0	A01_TAS_55C_MT_A_5_.fastq
A1S-55-6	SRS4213294	217231267					A1	A01	TAS	55C	MT	A	6	A01_TAS_55C_MT_A_6_.fastq	A1S-55-6	SRS4213294	217231267	217231267_Ankur046-A1S-55-6_S46	A01	A1	TAS	MT	55C	A	6	FLD0142	CAGAGAGTCA	A	2.5	19005	18940	16992	7000	0	0.0826641	0.0571429	0	A01_TAS_55C_MT_A_6_.fastq
A1S-55-7	SRS4213666	217228293					A1	A01	TAS	55C	MT	A	7	A01_TAS_55C_MT_A_7_.fastq	A1S-55-7	SRS4213666	217228293	217228293_Ankur047-A1S-55-7_S47	A01	A1	TAS	MT	55C	A	7	FLD0143	TCGATCGACA	A	2.5	19778	19678	17605	7000	0	0.0858262	0.0571429	0	A01_TAS_55C_MT_A_7_.fastq
A1S-55-8	SRS4213667	217248036					A1	A01	TAS	55C	MT	A	8	A01_TAS_55C_MT_A_8_.fastq	A1S-55-8	SRS4213667	217248036	217248036_Ankur048-A1S-55-8_S48	A01	A1	TAS	MT	55C	A	8	FLD0144	ACTGATGTAG	A	2.5	20099	19969	17923	7000	0	0.0972994	0.0571429	0	A01_TAS_55C_MT_A_8_.fastq
A3-45-1	SRS4213471	214654441					A3	A09	DePCR	45C	MT	A	1	A09_DePCR_45C_MT_A_1_.fastq	A3-45-1	SRS4213471	214654441	214646443_Ankur009-A2-45-1_S9	A09	A3	DePCR	MT	45C	A	1	FLD0009	GAGTGATCGT	A	2.5	26209	25875	21104	7000	Inf	2.31117	0.142857	37.288	A09_DePCR_45C_MT_A_1_.fastq
A3-45-2	SRS4213470	214640436					A3	A09	DePCR	45C	MT	A	2	A09_DePCR_45C_MT_A_2_.fastq	A3-45-2	SRS4213470	214640436	214660446_Ankur010-A2-45-2_S10	A09	A3	DePCR	MT	45C	A	2	FLD0010	CGCTATCAGT	A	2.5	10636	10485	8410	7000	Inf	2.33468	0.228571	34.6168	A09_DePCR_45C_MT_A_2_.fastq
A3-45-3	SRS4213477	214654442					A3	A09	DePCR	45C	MT	A	3	A09_DePCR_45C_MT_A_3_.fastq	A3-45-3	SRS4213477	214654442	214659446_Ankur011-A2-45-3_S11	A09	A3	DePCR	MT	45C	A	3	FLD0011	CGCTGTAGTC	A	2.5	13271	13104	10504	7000	Inf	2.32245	0.142857	39.3619	A09_DePCR_45C_MT_A_3_.fastq
A3-45-4	SRS4213476	214656450					A3	A09	DePCR	45C	MT	A	4	A09_DePCR_45C_MT_A_4_.fastq	A3-45-4	SRS4213476	214656450	214647438_Ankur012-A2-45-4_S12	A09	A3	DePCR	MT	45C	A	4	FLD0012	GCTAGTGAGT	A	2.5	25609	25282	20599	7000	Inf	2.2955	0.142857	39.5285	A09_DePCR_45C_MT_A_4_.fastq
A3-45-5	SRS4213475	214647441					A3	A09	DePCR	45C	MT	A	5	A09_DePCR_45C_MT_A_5_.fastq	A3-45-5	SRS4213475	214647441	214661447_Ankur013-A2-45-5_S13	A09	A3	DePCR	MT	45C	A	5	FLD0013	GAGCTAGTGA	A	2.5	24160	23869	19279	7000	Inf	2.30756	0.457143	37.1347	A09_DePCR_45C_MT_A_5_.fastq
A3-45-6	SRS4213474	214651445					A3	A09	DePCR	45C	MT	A	6	A09_DePCR_45C_MT_A_6_.fastq	A3-45-6	SRS4213474	214651445	214646444_Ankur014-A2-45-6_S14	A09	A3	DePCR	MT	45C	A	6	FLD0014	CGTGCTGTCA	A	2.5	17036	16837	13503	7000	Inf	2.3217	0.114286	35.6137	A09_DePCR_45C_MT_A_6_.fastq
A3-45-7	SRS4213479	214645439					A3	A09	DePCR	45C	MT	A	7	A09_DePCR_45C_MT_A_7_.fastq	A3-45-7	SRS4213479	214645439	214659447_Ankur015-A2-45-7_S15	A09	A3	DePCR	MT	45C	A	7	FLD0015	GATCGTCTCT	A	2.5	24371	24114	19782	7000	Inf	2.31337	0.285714	35.3091	A09_DePCR_45C_MT_A_7_.fastq
A3-45-8	SRS4213478	214656451					A3	A09	DePCR	45C	MT	A	8	A09_DePCR_45C_MT_A_8_.fastq	A3-45-8	SRS4213478	214656451	214661448_Ankur016-A2-45-8_S16	A09	A3	DePCR	MT	45C	A	8	FLD0016	GTGCTGTCGT	A	2.5	27262	26922	21774	7000	Inf	2.2996	0.257143	39.5911	A09_DePCR_45C_MT_A_8_.fastq
A3-55-1	SRS4213379	214640454					A3	A09	DePCR	55C	MT	A	1	A09_DePCR_55C_MT_A_1_.fastq	A3-55-1	SRS4213379	214640454	214653459_Ankur137-A2-55-1_S137	A09	A3	DePCR	MT	55C	A	1	FLD0201	GGTCAGTGTA	A	2.5	43420	42934	34962	7000	Inf	2.25016	0.971429	48.3099	A09_DePCR_55C_MT_A_1_.fastq
A3-55-2	SRS4213380	214663449					A3	A09	DePCR	55C	MT	A	2	A09_DePCR_55C_MT_A_2_.fastq	A3-55-2	SRS4213380	214663449	214659462_Ankur138-A2-55-2_S138	A09	A3	DePCR	MT	55C	A	2	FLD0202	GTAATGGAGT	A	2.5	38711	38223	31164	7000	Inf	2.28178	0.0857143	47.8467	A09_DePCR_55C_MT_A_2_.fastq
A3-55-3	SRS4213377	214646468					A3	A09	DePCR	55C	MT	A	3	A09_DePCR_55C_MT_A_3_.fastq	A3-55-3	SRS4213377	214646468	214644450_Ankur139-A2-55-3_S139	A09	A3	DePCR	MT	55C	A	3	FLD0203	CTCGTTATTC	A	2.5	24514	24277	19809	7000	Inf	2.26135	0.114286	46.0779	A09_DePCR_55C_MT_A_3_.fastq
A3-55-4	SRS4213378	214657465					A3	A09	DePCR	55C	MT	A	4	A09_DePCR_55C_MT_A_4_.fastq	A3-55-4	SRS4213378	214657465	214644451_Ankur140-A2-55-4_S140	A09	A3	DePCR	MT	55C	A	4	FLD0204	GGAAGTAAGG	A	2.5	40211	39756	31960	7000	Inf	2.25887	0.0571429	46.8285	A09_DePCR_55C_MT_A_4_.fastq
A3-55-5	SRS4213383	214640455					A3	A09	DePCR	55C	MT	A	5	A09_DePCR_55C_MT_A_5_.fastq	A3-55-5	SRS4213383	214640455	214661473_Ankur141-A2-55-5_S141	A09	A3	DePCR	MT	55C	A	5	FLD0205	CGGTGTGTGT	A	2.5	26713	26398	21108	7000	Inf	2.25784	0.0571429	48.9677	A09_DePCR_55C_MT_A_5_.fastq
A3-55-6	SRS4213542	214651460					A3	A09	DePCR	55C	MT	A	6	A09_DePCR_55C_MT_A_6_.fastq	A3-55-6	SRS4213542	214651460	214647461_Ankur142-A2-55-6_S142	A09	A3	DePCR	MT	55C	A	6	FLD0206	CGTCTTCTTA	A	2.5	23891	23632	19512	7000	Inf	2.24463	0.657143	47.2277	A09_DePCR_55C_MT_A_6_.fastq
A3-55-7	SRS4213381	214661474					A3	A09	DePCR	55C	MT	A	7	A09_DePCR_55C_MT_A_7_.fastq	A3-55-7	SRS4213381	214661474	214640453_Ankur143-A2-55-7_S143	A09	A3	DePCR	MT	55C	A	7	FLD0207	TGTGAATCTC	A	2.5	33895	33582	27555	7000	Inf	2.25654	0.4	49.2734	A09_DePCR_55C_MT_A_7_.fastq
A3-55-8	SRS4213541	214646469					A3	A09	DePCR	55C	MT	A	8	A09_DePCR_55C_MT_A_8_.fastq	A3-55-8	SRS4213541	214646469	214651459_Ankur144-A2-55-8_S144	A09	A3	DePCR	MT	55C	A	8	FLD0208	CTAATCGTGT	A	2.5	26669	26396	21373	7000	Inf	2.26348	0.0857143	49.7948	A09_DePCR_55C_MT_A_8_.fastq
A3S-45-1	SRS4213569	217247032					A3	A09	TAS	45C	MT	A	1	A09_TAS_45C_MT_A_1_.fastq	A3S-45-1	SRS4213569	217247032	217235195_Ankur009-A2S-45-1_S9	A09	A3	TAS	MT	45C	A	1	FLD0105	TGATAGAGAG	A	2.5	20697	20591	18357	7000	Inf	2.3512	0.0857143	21.182	A09_TAS_45C_MT_A_1_.fastq
A3S-45-2	SRS4213568	217232226					A3	A09	TAS	45C	MT	A	2	A09_TAS_45C_MT_A_2_.fastq	A3S-45-2	SRS4213568	217232226	217228284_Ankur010-A2S-45-2_S10	A09	A3	TAS	MT	45C	A	2	FLD0106	GCTACTAGCG	A	2.5	18696	18596	16441	7000	Inf	2.33714	0.0285714	21.6555	A09_TAS_45C_MT_A_2_.fastq
A3S-45-3	SRS4213424	217232227					A3	A09	TAS	45C	MT	A	3	A09_TAS_45C_MT_A_3_.fastq	A3S-45-3	SRS4213424	217232227	217246047_Ankur011-A2S-45-3_S11	A09	A3	TAS	MT	45C	A	3	FLD0107	TGCGAGACGT	A	2.5	18170	18081	15895	7000	Inf	2.33856	0.0285714	21.376	A09_TAS_45C_MT_A_3_.fastq
A3S-45-4	SRS4213425	217245122					A3	A09	TAS	45C	MT	A	4	A09_TAS_45C_MT_A_4_.fastq	A3S-45-4	SRS4213425	217245122	217236205_Ankur012-A2S-45-4_S12	A09	A3	TAS	MT	45C	A	4	FLD0108	CGATGACAGA	A	2.5	19422	19315	17145	7000	Inf	2.34312	0.0285714	20.921	A09_TAS_45C_MT_A_4_.fastq
A3S-45-5	SRS4213422	217246053					A3	A09	TAS	45C	MT	A	5	A09_TAS_45C_MT_A_5_.fastq	A3S-45-5	SRS4213422	217246053	217243137_Ankur013-A2S-45-5_S13	A09	A3	TAS	MT	45C	A	5	FLD0109	GACTCATGCT	A	2.5	19705	19618	17578	7000	Inf	2.34255	0.0857143	22.4721	A09_TAS_45C_MT_A_5_.fastq
A3S-45-6	SRS4213423	217238174					A3	A09	TAS	45C	MT	A	6	A09_TAS_45C_MT_A_6_.fastq	A3S-45-6	SRS4213423	217238174	217235197_Ankur014-A2S-45-6_S14	A09	A3	TAS	MT	45C	A	6	FLD0110	GTCTGATACG	A	2.5	17805	17722	15748	7000	Inf	2.35138	0.0285714	22.4541	A09_TAS_45C_MT_A_6_.fastq
A3S-45-7	SRS4213420	217243140					A3	A09	TAS	45C	MT	A	7	A09_TAS_45C_MT_A_7_.fastq	A3S-45-7	SRS4213420	217243140	217229260_Ankur015-A2S-45-7_S15	A09	A3	TAS	MT	45C	A	7	FLD0111	ACTAGCTGTC	A	2.5	21754	21645	19294	7000	Inf	2.34802	0.0285714	22.7634	A09_TAS_45C_MT_A_7_.fastq
A3S-45-8	SRS4213421	217241173					A3	A09	TAS	45C	MT	A	8	A09_TAS_45C_MT_A_8_.fastq	A3S-45-8	SRS4213421	217241173	217237205_Ankur016-A2S-45-8_S16	A09	A3	TAS	MT	45C	A	8	FLD0112	GCGTAGACGA	A	2.5	18668	18573	16453	7000	Inf	2.33826	0	20.74	A09_TAS_45C_MT_A_8_.fastq
A3S-55-1	SRS4213418	217232233					A3	A09	TAS	55C	MT	A	1	A09_TAS_55C_MT_A_1_.fastq	A3S-55-1	SRS4213418	217232233	217246066_Ankur049-A2S-55-1_S49	A09	A3	TAS	MT	55C	A	1	FLD0145	ACTCGATAGT	A	2.5	22110	21990	19567	7000	Inf	2.34112	0.142857	21.3749	A09_TAS_55C_MT_A_1_.fastq
A3S-55-2	SRS4213419	217228295					A3	A09	TAS	55C	MT	A	2	A09_TAS_55C_MT_A_2_.fastq	A3S-55-2	SRS4213419	217228295	217244134_Ankur050-A2S-55-2_S50	A09	A3	TAS	MT	55C	A	2	FLD0146	GACGATCGCA	A	2.5	20506	20398	18092	7000	Inf	2.34425	0.114286	20.0812	A09_TAS_55C_MT_A_2_.fastq
A3S-55-3	SRS4213426	217237221					A3	A09	TAS	55C	MT	A	3	A09_TAS_55C_MT_A_3_.fastq	A3S-55-3	SRS4213426	217237221	217241177_Ankur051-A2S-55-3_S51	A09	A3	TAS	MT	55C	A	3	FLD0147	TCATCATGCG	A	2.5	19934	19848	17601	7000	Inf	2.35578	0.0285714	19.3212	A09_TAS_55C_MT_A_3_.fastq
A3S-55-4	SRS4213427	217237223					A3	A09	TAS	55C	MT	A	4	A09_TAS_55C_MT_A_4_.fastq	A3S-55-4	SRS4213427	217237223	217235205_Ankur052-A2S-55-4_S52	A09	A3	TAS	MT	55C	A	4	FLD0148	ACATGTCTGA	A	2.5	21140	21011	18679	7000	Inf	2.35244	0.142857	19.5393	A09_TAS_55C_MT_A_4_.fastq
A3S-55-5	SRS4213620	217231271					A3	A09	TAS	55C	MT	A	5	A09_TAS_55C_MT_A_5_.fastq	A3S-55-5	SRS4213620	217231271	217242147_Ankur053-A2S-55-5_S53	A09	A3	TAS	MT	55C	A	5	FLD0149	AGTCATCGCA	A	2.5	22327	22210	19751	7000	Inf	2.35022	0.0857143	20.7471	A09_TAS_55C_MT_A_5_.fastq
A3S-55-6	SRS4213621	217245133					A3	A09	TAS	55C	MT	A	6	A09_TAS_55C_MT_A_6_.fastq	A3S-55-6	SRS4213621	217245133	217235206_Ankur054-A2S-55-6_S54	A09	A3	TAS	MT	55C	A	6	FLD0150	TAGCATACAG	A	2.5	16712	16616	14385	7000	Inf	2.35185	0.0285714	20.9903	A09_TAS_55C_MT_A_6_.fastq
A3S-55-7	SRS4213622	217231272					A3	A09	TAS	55C	MT	A	7	A09_TAS_55C_MT_A_7_.fastq	A3S-55-7	SRS4213622	217231272	217228294_Ankur055-A2S-55-7_S55	A09	A3	TAS	MT	55C	A	7	FLD0151	AGAGTCGCGT	A	2.5	20917	20823	18413	7000	Inf	2.35713	0.0285714	20.463	A09_TAS_55C_MT_A_7_.fastq
A3S-55-8	SRS4213623	217238184					A3	A09	TAS	55C	MT	A	8	A09_TAS_55C_MT_A_8_.fastq	A3S-55-8	SRS4213623	217238184	217240178_Ankur056-A2S-55-8_S56	A09	A3	TAS	MT	55C	A	8	FLD0152	TCTACGACAT	A	2.5	19382	19294	17195	7000	Inf	2.33706	0.142857	20.6236	A09_TAS_55C_MT_A_8_.fastq
A2-45-1	SRS4213693	214646443					A2	A10	DePCR	45C	MT	A	1	A10_DePCR_45C_MT_A_1_.fastq	A2-45-1	SRS4213693	214646443	214654441_Ankur017-A3-45-1_S17	A10	A2	DePCR	MT	45C	A	1	FLD0017	TGAGCGTGCT	A	2.5	17976	17790	14232	7000	3.20965	2.30295	0.2	43.6135	A10_DePCR_45C_MT_A_1_.fastq
A2-45-2	SRS4213692	214660446					A2	A10	DePCR	45C	MT	A	2	A10_DePCR_45C_MT_A_2_.fastq	A2-45-2	SRS4213692	214660446	214640436_Ankur018-A3-45-2_S18	A10	A2	DePCR	MT	45C	A	2	FLD0018	CATGTCGTCA	A	2.5	12633	12485	10117	7000	3.63403	2.32468	0.142857	39.1035	A10_DePCR_45C_MT_A_2_.fastq
A2-45-3	SRS4213699	214659446					A2	A10	DePCR	45C	MT	A	3	A10_DePCR_45C_MT_A_3_.fastq	A2-45-3	SRS4213699	214659446	214654442_Ankur019-A3-45-3_S19	A10	A2	DePCR	MT	45C	A	3	FLD0019	TCAGTGTCTC	A	2.5	15576	15423	12408	7000	3.49346	2.29892	0.257143	43.1118	A10_DePCR_45C_MT_A_3_.fastq
A2-45-4	SRS4213698	214647438					A2	A10	DePCR	45C	MT	A	4	A10_DePCR_45C_MT_A_4_.fastq	A2-45-4	SRS4213698	214647438	214656450_Ankur020-A3-45-4_S20	A10	A2	DePCR	MT	45C	A	4	FLD0020	GTGCTCATGT	A	2.5	17686	17496	14100	7000	3.28474	2.31401	0.457143	45.8561	A10_DePCR_45C_MT_A_4_.fastq
A2-45-5	SRS4213602	214661447					A2	A10	DePCR	45C	MT	A	5	A10_DePCR_45C_MT_A_5_.fastq	A2-45-5	SRS4213602	214661447	214647441_Ankur021-A3-45-5_S21	A10	A2	DePCR	MT	45C	A	5	FLD0021	CGTATCTCGA	A	2.5	12402	12269	9850	7000	3.29522	2.32725	0.628571	43.7643	A10_DePCR_45C_MT_A_5_.fastq
A2-45-6	SRS4213603	214646444					A2	A10	DePCR	45C	MT	A	6	A10_DePCR_45C_MT_A_6_.fastq	A2-45-6	SRS4213603	214646444	214651445_Ankur022-A3-45-6_S22	A10	A2	DePCR	MT	45C	A	6	FLD0022	GTCATGCGTC	A	2.5	22081	21815	17380	7000	3.67756	2.30737	0.514286	41.7643	A10_DePCR_45C_MT_A_6_.fastq
A2-45-7	SRS4213604	214659447					A2	A10	DePCR	45C	MT	A	7	A10_DePCR_45C_MT_A_7_.fastq	A2-45-7	SRS4213604	214659447	214645439_Ankur023-A3-45-7_S23	A10	A2	DePCR	MT	45C	A	7	FLD0023	CTATGCGATC	A	2.5	14770	14622	11698	7000	3.31613	2.30951	0.228571	44.2585	A10_DePCR_45C_MT_A_7_.fastq
A2-45-8	SRS4213605	214661448					A2	A10	DePCR	45C	MT	A	8	A10_DePCR_45C_MT_A_8_.fastq	A2-45-8	SRS4213605	214661448	214656451_Ankur024-A3-45-8_S24	A10	A2	DePCR	MT	45C	A	8	FLD0024	TGCTATGCTG	A	2.5	20548	20343	16420	7000	3.45627	2.33228	0.457143	42.5226	A10_DePCR_45C_MT_A_8_.fastq
A2-55-1	SRS4213598	214653459					A2	A10	DePCR	55C	MT	A	1	A10_DePCR_55C_MT_A_1_.fastq	A2-55-1	SRS4213598	214653459	214640454_Ankur145-A3-55-1_S145	A10	A2	DePCR	MT	55C	A	1	FLD0209	CTCTTAGTTC	A	2.5	25170	24914	20118	7000	3.13398	2.25672	0.2	53.3114	A10_DePCR_55C_MT_A_1_.fastq
A2-55-2	SRS4213599	214659462					A2	A10	DePCR	55C	MT	A	2	A10_DePCR_55C_MT_A_2_.fastq	A2-55-2	SRS4213599	214659462	214663449_Ankur146-A3-55-2_S146	A10	A2	DePCR	MT	55C	A	2	FLD0210	GGATAGGATC	A	2.5	36725	36354	29256	7000	3.09556	2.23266	0.2	53.1229	A10_DePCR_55C_MT_A_2_.fastq
A2-55-3	SRS4213600	214644450					A2	A10	DePCR	55C	MT	A	3	A10_DePCR_55C_MT_A_3_.fastq	A2-55-3	SRS4213600	214644450	214646468_Ankur147-A3-55-3_S147	A10	A2	DePCR	MT	55C	A	3	FLD0211	GGTGTCTTGT	A	2.5	35953	35551	29014	7000	3.2272	2.2467	0.2	55.5198	A10_DePCR_55C_MT_A_3_.fastq
A2-55-4	SRS4213601	214644451					A2	A10	DePCR	55C	MT	A	4	A10_DePCR_55C_MT_A_4_.fastq	A2-55-4	SRS4213601	214644451	214657465_Ankur148-A3-55-4_S148	A10	A2	DePCR	MT	55C	A	4	FLD0212	GATGGTTGTA	A	2.5	34298	33952	27604	7000	3.03283	2.26052	0.0857143	52.8476	A10_DePCR_55C_MT_A_4_.fastq
A2-55-5	SRS4213596	214661473					A2	A10	DePCR	55C	MT	A	5	A10_DePCR_55C_MT_A_5_.fastq	A2-55-5	SRS4213596	214661473	214640455_Ankur149-A3-55-5_S149	A10	A2	DePCR	MT	55C	A	5	FLD0213	CCTCGTTGTT	A	2.5	26826	26535	21587	7000	3.07532	2.23738	0.114286	57.1481	A10_DePCR_55C_MT_A_5_.fastq
A2-55-6	SRS4213597	214647461					A2	A10	DePCR	55C	MT	A	6	A10_DePCR_55C_MT_A_6_.fastq	A2-55-6	SRS4213597	214647461	214651460_Ankur150-A3-55-6_S150	A10	A2	DePCR	MT	55C	A	6	FLD0214	GGTTGGAGTT	A	2.5	48675	48151	39122	7000	2.99368	2.25864	0.0571429	58.0892	A10_DePCR_55C_MT_A_6_.fastq
A2-55-7	SRS4213473	214640453					A2	A10	DePCR	55C	MT	A	7	A10_DePCR_55C_MT_A_7_.fastq	A2-55-7	SRS4213473	214640453	214661474_Ankur151-A3-55-7_S151	A10	A2	DePCR	MT	55C	A	7	FLD0215	TGGTGTCCGT	A	2.5	28399	28109	22346	7000	3.12323	2.25762	0.114286	54.4151	A10_DePCR_55C_MT_A_7_.fastq
A2-55-8	SRS4213472	214651459					A2	A10	DePCR	55C	MT	A	8	A10_DePCR_55C_MT_A_8_.fastq	A2-55-8	SRS4213472	214651459	214646469_Ankur152-A3-55-8_S152	A10	A2	DePCR	MT	55C	A	8	FLD0216	CGTTAGCGTA	A	2.5	25751	25479	20644	7000	3.17703	2.27221	0.142857	55.776	A10_DePCR_55C_MT_A_8_.fastq
A2S-45-1	SRS4213668	217235195					A2	A10	TAS	45C	MT	A	1	A10_TAS_45C_MT_A_1_.fastq	A2S-45-1	SRS4213668	217235195	217247032_Ankur017-A3S-45-1_S17	A10	A2	TAS	MT	45C	A	1	FLD0113	CTCAGCAGTG	A	2.5	20614	20508	18161	7000	6.56777	2.28272	0.0285714	19.2921	A10_TAS_45C_MT_A_1_.fastq
A2S-45-2	SRS4213669	217228284					A2	A10	TAS	45C	MT	A	2	A10_TAS_45C_MT_A_2_.fastq	A2S-45-2	SRS4213669	217228284	217232226_Ankur018-A3S-45-2_S18	A10	A2	TAS	MT	45C	A	2	FLD0114	CAGTCTACAT	A	2.5	18757	18658	16689	7000	7.0101	2.28533	0.0571429	19.9748	A10_TAS_45C_MT_A_2_.fastq
A2S-45-3	SRS4213662	217246047					A2	A10	TAS	45C	MT	A	3	A10_TAS_45C_MT_A_3_.fastq	A2S-45-3	SRS4213662	217246047	217232227_Ankur019-A3S-45-3_S19	A10	A2	TAS	MT	45C	A	3	FLD0115	TACTGCAGCG	A	2.5	19335	19252	17121	7000	6.8306	2.29083	0.0571429	20.9972	A10_TAS_45C_MT_A_3_.fastq
A2S-45-4	SRS4213663	217236205					A2	A10	TAS	45C	MT	A	4	A10_TAS_45C_MT_A_4_.fastq	A2S-45-4	SRS4213663	217236205	217245122_Ankur020-A3S-45-4_S20	A10	A2	TAS	MT	45C	A	4	FLD0116	TACACAGTAG	A	2.5	17537	17451	15449	7000	6.45829	2.2921	0.0571429	19.8398	A10_TAS_45C_MT_A_4_.fastq
A2S-45-5	SRS4213664	217243137					A2	A10	TAS	45C	MT	A	5	A10_TAS_45C_MT_A_5_.fastq	A2S-45-5	SRS4213664	217243137	217246053_Ankur021-A3S-45-5_S21	A10	A2	TAS	MT	45C	A	5	FLD0117	CACATACAGT	A	2.5	20631	20490	18209	7000	6.62936	2.27427	0.0285714	20.1474	A10_TAS_45C_MT_A_5_.fastq
A2S-45-6	SRS4213665	217235197					A2	A10	TAS	45C	MT	A	6	A10_TAS_45C_MT_A_6_.fastq	A2S-45-6	SRS4213665	217235197	217238174_Ankur022-A3S-45-6_S22	A10	A2	TAS	MT	45C	A	6	FLD0118	CACAGTGATG	A	2.5	16833	16741	14791	7000	6.84016	2.2806	0	20.2553	A10_TAS_45C_MT_A_6_.fastq
A2S-45-7	SRS4213660	217229260					A2	A10	TAS	45C	MT	A	7	A10_TAS_45C_MT_A_7_.fastq	A2S-45-7	SRS4213660	217229260	217243140_Ankur023-A3S-45-7_S23	A10	A2	TAS	MT	45C	A	7	FLD0119	CGAGCTAGCA	A	2.5	17134	17036	15120	7000	6.95077	2.28736	0.0857143	19.3302	A10_TAS_45C_MT_A_7_.fastq
A2S-45-8	SRS4213661	217237205					A2	A10	TAS	45C	MT	A	8	A10_TAS_45C_MT_A_8_.fastq	A2S-45-8	SRS4213661	217237205	217241173_Ankur024-A3S-45-8_S24	A10	A2	TAS	MT	45C	A	8	FLD0120	GAGACTATGC	A	2.5	16176	16115	14231	7000	6.87678	2.28572	0.0857143	18.9057	A10_TAS_45C_MT_A_8_.fastq
A2S-55-1	SRS4213561	217246066					A2	A10	TAS	55C	MT	A	1	A10_TAS_55C_MT_A_1_.fastq	A2S-55-1	SRS4213561	217246066	217232233_Ankur057-A3S-55-1_S57	A10	A2	TAS	MT	55C	A	1	FLD0153	CACGAGATGA	A	2.5	20339	20226	17853	7000	6.72746	2.29193	0	19.3339	A10_TAS_55C_MT_A_1_.fastq
A2S-55-2	SRS4213560	217244134					A2	A10	TAS	55C	MT	A	2	A10_TAS_55C_MT_A_2_.fastq	A2S-55-2	SRS4213560	217244134	217228295_Ankur058-A3S-55-2_S58	A10	A2	TAS	MT	55C	A	2	FLD0154	ACGCACATAT	A	2.5	20961	20823	18510	7000	6.38454	2.29037	0.0571429	19.0972	A10_TAS_55C_MT_A_2_.fastq
A2S-55-3	SRS4213563	217241177					A2	A10	TAS	55C	MT	A	3	A10_TAS_55C_MT_A_3_.fastq	A2S-55-3	SRS4213563	217241177	217237221_Ankur059-A3S-55-3_S59	A10	A2	TAS	MT	55C	A	3	FLD0155	ACGTGCTCTG	A	2.5	19456	19325	17212	7000	6.63167	2.28793	0	19.9539	A10_TAS_55C_MT_A_3_.fastq
A2S-55-4	SRS4213562	217235205					A2	A10	TAS	55C	MT	A	4	A10_TAS_55C_MT_A_4_.fastq	A2S-55-4	SRS4213562	217235205	217237223_Ankur060-A3S-55-4_S60	A10	A2	TAS	MT	55C	A	4	FLD0156	ACGATCACAT	A	2.5	21133	21016	18691	7000	6.84541	2.31221	0.285714	18.1034	A10_TAS_55C_MT_A_4_.fastq
A2S-55-5	SRS4213557	217242147					A2	A10	TAS	55C	MT	A	5	A10_TAS_55C_MT_A_5_.fastq	A2S-55-5	SRS4213557	217242147	217231271_Ankur061-A3S-55-5_S61	A10	A2	TAS	MT	55C	A	5	FLD0157	AGTGTACTCA	A	2.5	22405	22282	19881	7000	6.60108	2.30557	0.171429	20.1988	A10_TAS_55C_MT_A_5_.fastq
A2S-55-6	SRS4213556	217235206					A2	A10	TAS	55C	MT	A	6	A10_TAS_55C_MT_A_6_.fastq	A2S-55-6	SRS4213556	217235206	217245133_Ankur062-A3S-55-6_S62	A10	A2	TAS	MT	55C	A	6	FLD0158	TGATGTATGT	A	2.5	18228	18147	16181	7000	6.43519	2.27427	0.114286	19.5014	A10_TAS_55C_MT_A_6_.fastq
A2S-55-7	SRS4213559	217228294					A2	A10	TAS	55C	MT	A	7	A10_TAS_55C_MT_A_7_.fastq	A2S-55-7	SRS4213559	217228294	217231272_Ankur063-A3S-55-7_S63	A10	A2	TAS	MT	55C	A	7	FLD0159	GATATATGTC	A	2.5	20822	20719	18577	7000	6.79117	2.29335	0.0857143	19.8536	A10_TAS_55C_MT_A_7_.fastq
A2S-55-8	SRS4213558	217240178					A2	A10	TAS	55C	MT	A	8	A10_TAS_55C_MT_A_8_.fastq	A2S-55-8	SRS4213558	217240178	217238184_Ankur064-A3S-55-8_S64	A10	A2	TAS	MT	55C	A	8	FLD0160	TAGTACTAGA	A	2.5	18107	18029	16175	7000	6.71245	2.28378	0.0857143	18.1025	A10_TAS_55C_MT_A_8_.fastq
A4-45-1	SRS4213375	214644437					A4	A27	DePCR	45C	MT	A	1	A27_DePCR_45C_MT_A_1_.fastq	A4-45-1	SRS4213375	214644437	214644437_Ankur025-A4-45-1_S25	A27	A4	DePCR	MT	45C	A	1	FLD0025	TGTGTGCATG	A	2.5	13399	13262	10357	7000	Inf	3.24447	0.257143	52.6485	A27_DePCR_45C_MT_A_1_.fastq
A4-45-2	SRS4213376	214639441					A4	A27	DePCR	45C	MT	A	2	A27_DePCR_45C_MT_A_2_.fastq	A4-45-2	SRS4213376	214639441	214639441_Ankur026-A4-45-2_S26	A27	A4	DePCR	MT	45C	A	2	FLD0026	GAGTGTCACT	A	2.5	21108	20903	16722	7000	Inf	3.22469	0.228571	56.6344	A27_DePCR_45C_MT_A_2_.fastq
A4-45-3	SRS4213749	214639442					A4	A27	DePCR	45C	MT	A	3	A27_DePCR_45C_MT_A_3_.fastq	A4-45-3	SRS4213749	214639442	214639442_Ankur027-A4-45-3_S27	A27	A4	DePCR	MT	45C	A	3	FLD0027	CTAGTCTCGT	A	2.5	14160	14026	11235	7000	Inf	3.27141	0.285714	48.8628	A27_DePCR_45C_MT_A_3_.fastq
A4-45-4	SRS4213748	214646445					A4	A27	DePCR	45C	MT	A	4	A27_DePCR_45C_MT_A_4_.fastq	A4-45-4	SRS4213748	214646445	214646445_Ankur028-A4-45-4_S28	A27	A4	DePCR	MT	45C	A	4	FLD0028	GAGTGCATCT	A	2.5	16759	16601	13219	7000	Inf	3.21857	0.0857143	55.5716	A27_DePCR_45C_MT_A_4_.fastq
A4-45-5	SRS4213751	214656452					A4	A27	DePCR	45C	MT	A	5	A27_DePCR_45C_MT_A_5_.fastq	A4-45-5	SRS4213751	214656452	214656452_Ankur029-A4-45-5_S29	A27	A4	DePCR	MT	45C	A	5	FLD0029	TGCGTAGTCG	A	2.5	17584	17399	13985	7000	Inf	3.25456	0.114286	48.9307	A27_DePCR_45C_MT_A_5_.fastq
A4-45-6	SRS4213750	214651446					A4	A27	DePCR	45C	MT	A	6	A27_DePCR_45C_MT_A_6_.fastq	A4-45-6	SRS4213750	214651446	214651446_Ankur030-A4-45-6_S30	A27	A4	DePCR	MT	45C	A	6	FLD0030	CTGTGTCGTC	A	2.5	14909	14755	11646	7000	Inf	3.27364	0.142857	50.3014	A27_DePCR_45C_MT_A_6_.fastq
A4-45-7	SRS4213753	214662451					A4	A27	DePCR	45C	MT	A	7	A27_DePCR_45C_MT_A_7_.fastq	A4-45-7	SRS4213753	214662451	214662451_Ankur031-A4-45-7_S31	A27	A4	DePCR	MT	45C	A	7	FLD0031	CTGTAGTGCG	A	2.5	12971	12827	9832	7000	Inf	3.27206	0.114286	48.0279	A27_DePCR_45C_MT_A_7_.fastq
A4-45-8	SRS4213752	214645441					A4	A27	DePCR	45C	MT	A	8	A27_DePCR_45C_MT_A_8_.fastq	A4-45-8	SRS4213752	214645441	214645441_Ankur032-A4-45-8_S32	A27	A4	DePCR	MT	45C	A	8	FLD0032	GTGCGCTAGT	A	2.5	22953	22725	17909	7000	Inf	3.22476	0.457143	54.1141	A27_DePCR_45C_MT_A_8_.fastq
A4-55-1	SRS4213755	214644453					A4	A27	DePCR	55C	MT	A	1	A27_DePCR_55C_MT_A_1_.fastq	A4-55-1	SRS4213755	214644453	214644453_Ankur153-A4-55-1_S153	A27	A4	DePCR	MT	55C	A	1	FLD0217	TACTAGGATC	A	2.5	25046	24801	19613	7000	Inf	2.60005	0.2	118.706	A27_DePCR_55C_MT_A_1_.fastq
A4-55-2	SRS4213754	214648454					A4	A27	DePCR	55C	MT	A	2	A27_DePCR_55C_MT_A_2_.fastq	A4-55-2	SRS4213754	214648454	214648454_Ankur154-A4-55-2_S154	A27	A4	DePCR	MT	55C	A	2	FLD0218	GTCTCAATGT	A	2.5	26145	25909	20668	7000	Inf	2.60611	0.114286	116.725	A27_DePCR_55C_MT_A_2_.fastq
A4-55-3	SRS4213747	214653461					A4	A27	DePCR	55C	MT	A	3	A27_DePCR_55C_MT_A_3_.fastq	A4-55-3	SRS4213747	214653461	214653461_Ankur155-A4-55-3_S155	A27	A4	DePCR	MT	55C	A	3	FLD0219	GATGAGGTAT	A	2.5	36776	36423	28723	7000	Inf	2.59318	0.0285714	116.746	A27_DePCR_55C_MT_A_3_.fastq
A4-55-4	SRS4213745	214645451					A4	A27	DePCR	55C	MT	A	4	A27_DePCR_55C_MT_A_4_.fastq	A4-55-4	SRS4213745	214645451	214645451_Ankur156-A4-55-4_S156	A27	A4	DePCR	MT	55C	A	4	FLD0220	GGTGTTAGTG	A	2.5	34498	34136	27055	7000	Inf	2.60259	0.142857	115.406	A27_DePCR_55C_MT_A_4_.fastq
A4-55-5	SRS4213681	214662466					A4	A27	DePCR	55C	MT	A	5	A27_DePCR_55C_MT_A_5_.fastq	A4-55-5	SRS4213681	214662466	214662466_Ankur157-A4-55-5_S157	A27	A4	DePCR	MT	55C	A	5	FLD0221	CATTCTCTGA	A	2.5	24559	24353	19177	7000	Inf	2.55582	0.314286	119.2	A27_DePCR_55C_MT_A_5_.fastq
A4-55-6	SRS4213680	214662467					A4	A27	DePCR	55C	MT	A	6	A27_DePCR_55C_MT_A_6_.fastq	A4-55-6	SRS4213680	214662467	214662467_Ankur158-A4-55-6_S158	A27	A4	DePCR	MT	55C	A	6	FLD0222	CATCTGGAGT	A	2.5	27127	26876	21309	7000	Inf	2.54013	0.285714	122.33	A27_DePCR_55C_MT_A_6_.fastq
A4-55-7	SRS4213682	214657466					A4	A27	DePCR	55C	MT	A	7	A27_DePCR_55C_MT_A_7_.fastq	A4-55-7	SRS4213682	214657466	214657466_Ankur159-A4-55-7_S159	A27	A4	DePCR	MT	55C	A	7	FLD0223	GAATGGAAGA	A	2.5	39819	39471	31305	7000	Inf	2.57901	0.142857	118.394	A27_DePCR_55C_MT_A_7_.fastq
A4-55-8	SRS4213683	214653462					A4	A27	DePCR	55C	MT	A	8	A27_DePCR_55C_MT_A_8_.fastq	A4-55-8	SRS4213683	214653462	214653462_Ankur160-A4-55-8_S160	A27	A4	DePCR	MT	55C	A	8	FLD0224	GGCTGTGATC	A	2.5	38638	38257	30041	7000	Inf	2.58843	0.0285714	116.743	A27_DePCR_55C_MT_A_8_.fastq
A4S-45-1	SRS4213616	217240168					A4	A27	TAS	45C	MT	A	1	A27_TAS_45C_MT_A_1_.fastq	A4S-45-1	SRS4213616	217240168	217240168_Ankur025-A4S-45-1_S25	A27	A4	TAS	MT	45C	A	1	FLD0121	CAGAGCTAGT	A	2.5	21094	21005	18490	7000	Inf	3.38095	0.2	22.1028	A27_TAS_45C_MT_A_1_.fastq
A4S-45-2	SRS4213617	217230267					A4	A27	TAS	45C	MT	A	2	A27_TAS_45C_MT_A_2_.fastq	A4S-45-2	SRS4213617	217230267	217230267_Ankur026-A4S-45-2_S26	A27	A4	TAS	MT	45C	A	2	FLD0122	CGCAGAGCAT	A	2.5	20385	20277	17633	7000	Inf	3.38762	0.2	24.0605	A27_TAS_45C_MT_A_2_.fastq
A4S-45-3	SRS4213618	217244125					A4	A27	TAS	45C	MT	A	3	A27_TAS_45C_MT_A_3_.fastq	A4S-45-3	SRS4213618	217244125	217244125_Ankur027-A4S-45-3_S27	A27	A4	TAS	MT	45C	A	3	FLD0123	TGTACAGCGA	A	2.5	18246	18154	15859	7000	Inf	3.36062	0.0285714	24.1073	A27_TAS_45C_MT_A_3_.fastq
A4S-45-4	SRS4213619	217244126					A4	A27	TAS	45C	MT	A	4	A27_TAS_45C_MT_A_4_.fastq	A4S-45-4	SRS4213619	217244126	217244126_Ankur028-A4S-45-4_S28	A27	A4	TAS	MT	45C	A	4	FLD0124	ACGTCAGTAT	A	2.5	20656	20526	18114	7000	Inf	3.3791	0.0857143	24.0485	A27_TAS_45C_MT_A_4_.fastq
A4S-45-5	SRS4213624	217246056					A4	A27	TAS	45C	MT	A	5	A27_TAS_45C_MT_A_5_.fastq	A4S-45-5	SRS4213624	217246056	217246056_Ankur029-A4S-45-5_S29	A27	A4	TAS	MT	45C	A	5	FLD0125	TCACAGCATA	A	2.5	19735	19627	17225	7000	Inf	3.37241	0.142857	22.8581	A27_TAS_45C_MT_A_5_.fastq
A4S-45-6	SRS4213625	217237211					A4	A27	TAS	45C	MT	A	6	A27_TAS_45C_MT_A_6_.fastq	A4S-45-6	SRS4213625	217237211	217237211_Ankur030-A4S-45-6_S30	A27	A4	TAS	MT	45C	A	6	FLD0126	ACTGCGTGTC	A	2.5	19061	18950	16618	7000	Inf	3.36506	0.0571429	24.3582	A27_TAS_45C_MT_A_6_.fastq
A4S-45-7	SRS4213769	217242140					A4	A27	TAS	45C	MT	A	7	A27_TAS_45C_MT_A_7_.fastq	A4S-45-7	SRS4213769	217242140	217242140_Ankur031-A4S-45-7_S31	A27	A4	TAS	MT	45C	A	7	FLD0127	CGATCGACTG	A	2.5	17785	17693	15600	7000	Inf	3.34684	0.0285714	25.5395	A27_TAS_45C_MT_A_7_.fastq
A4S-45-8	SRS4213768	217239205					A4	A27	TAS	45C	MT	A	8	A27_TAS_45C_MT_A_8_.fastq	A4S-45-8	SRS4213768	217239205	217239205_Ankur032-A4S-45-8_S32	A27	A4	TAS	MT	45C	A	8	FLD0128	GCGAGATGTA	A	2.5	16474	16393	14035	7000	Inf	3.36641	0	24.7261	A27_TAS_45C_MT_A_8_.fastq
A4S-55-1	SRS4213767	217235212					A4	A27	TAS	55C	MT	A	1	A27_TAS_55C_MT_A_1_.fastq	A4S-55-1	SRS4213767	217235212	217235212_Ankur065-A4S-55-1_S65	A27	A4	TAS	MT	55C	A	1	FLD0161	TATAGAGATC	A	2.5	19649	19582	17304	7000	Inf	3.36961	0.0857143	25.4297	A27_TAS_55C_MT_A_1_.fastq
A4S-55-2	SRS4213766	217229270					A4	A27	TAS	55C	MT	A	2	A27_TAS_55C_MT_A_2_.fastq	A4S-55-2	SRS4213766	217229270	217229270_Ankur066-A4S-55-2_S66	A27	A4	TAS	MT	55C	A	2	FLD0162	TCGATATCTA	A	2.5	18843	18765	16413	7000	Inf	3.3643	0	24.0251	A27_TAS_55C_MT_A_2_.fastq
A4S-55-3	SRS4213774	217239213					A4	A27	TAS	55C	MT	A	3	A27_TAS_55C_MT_A_3_.fastq	A4S-55-3	SRS4213774	217239213	217239213_Ankur067-A4S-55-3_S67	A27	A4	TAS	MT	55C	A	3	FLD0163	TACATGATAG	A	2.5	20400	20305	17918	7000	Inf	3.36923	0.114286	23.1388	A27_TAS_55C_MT_A_3_.fastq
A4S-55-4	SRS4213772	217245136					A4	A27	TAS	55C	MT	A	4	A27_TAS_55C_MT_A_4_.fastq	A4S-55-4	SRS4213772	217245136	217245136_Ankur068-A4S-55-4_S68	A27	A4	TAS	MT	55C	A	4	FLD0164	TGAGATCATA	A	2.5	19875	19804	17546	7000	Inf	3.36746	0.0857143	25.8972	A27_TAS_55C_MT_A_4_.fastq
A4S-55-5	SRS4213771	217235213					A4	A27	TAS	55C	MT	A	5	A27_TAS_55C_MT_A_5_.fastq	A4S-55-5	SRS4213771	217235213	217235213_Ankur069-A4S-55-5_S69	A27	A4	TAS	MT	55C	A	5	FLD0165	CTACATACTA	A	2.5	17854	17766	15737	7000	Inf	3.37036	0.0571429	22.626	A27_TAS_55C_MT_A_5_.fastq
A4S-55-6	SRS4213770	217232237					A4	A27	TAS	55C	MT	A	6	A27_TAS_55C_MT_A_6_.fastq	A4S-55-6	SRS4213770	217232237	217232237_Ankur070-A4S-55-6_S70	A27	A4	TAS	MT	55C	A	6	FLD0166	ATCAGTGTAT	A	2.5	20560	20455	18125	7000	Inf	3.36581	0.228571	24.4998	A27_TAS_55C_MT_A_6_.fastq
A4S-55-7	SRS4213775	217246070					A4	A27	TAS	55C	MT	A	7	A27_TAS_55C_MT_A_7_.fastq	A4S-55-7	SRS4213775	217246070	217246070_Ankur071-A4S-55-7_S71	A27	A4	TAS	MT	55C	A	7	FLD0167	ATCATATCTC	A	2.5	19577	19480	17216	7000	Inf	3.36713	0.114286	25.6681	A27_TAS_55C_MT_A_7_.fastq
A4S-55-8	SRS4213773	217243151					A4	A27	TAS	55C	MT	A	8	A27_TAS_55C_MT_A_8_.fastq	A4S-55-8	SRS4213773	217243151	217243151_Ankur072-A4S-55-8_S72	A27	A4	TAS	MT	55C	A	8	FLD0168	AGTAGATCAT	A	2.5	21133	21029	18644	7000	Inf	3.35527	0.171429	24.595	A27_TAS_55C_MT_A_8_.fastq
A6-45-1	SRS4213684	214662453					A6	A64	DePCR	45C	MT	A	1	A64_DePCR_45C_MT_A_1_.fastq	A6-45-1	SRS4213684	214662453	214662453_Ankur033-A6-45-1_S33	A64	A6	DePCR	MT	45C	A	1	FLD0033	TGTGCTCGCA	A	2.5	15364	15191	11918	7000	6.40835	3.44733	0.571429	98.4742	A64_DePCR_45C_MT_A_1_.fastq
A6-45-2	SRS4213685	214639444					A6	A64	DePCR	45C	MT	A	2	A64_DePCR_45C_MT_A_2_.fastq	A6-45-2	SRS4213685	214639444	214639444_Ankur034-A6-45-2_S34	A64	A6	DePCR	MT	45C	A	2	FLD0034	GATGCGAGCT	A	2.5	19278	19066	15127	7000	5.61533	3.38778	0.371429	104.116	A64_DePCR_45C_MT_A_2_.fastq
A6-45-3	SRS4213687	214646447					A6	A64	DePCR	45C	MT	A	3	A64_DePCR_45C_MT_A_3_.fastq	A6-45-3	SRS4213687	214646447	214646447_Ankur035-A6-45-3_S35	A64	A6	DePCR	MT	45C	A	3	FLD0035	CTGTACGTGA	A	2.5	11167	11040	8455	7000	6.30588	3.45542	1.91429	97.7377	A64_DePCR_45C_MT_A_3_.fastq
A6-45-4	SRS4213686	214640438					A6	A64	DePCR	45C	MT	A	4	A64_DePCR_45C_MT_A_4_.fastq	A6-45-4	SRS4213686	214640438	214640438_Ankur036-A6-45-4_S36	A64	A6	DePCR	MT	45C	A	4	FLD0036	GCGATGATGA	A	2.5	23662	23405	18613	7000	5.69651	3.37208	0.0857143	105.474	A64_DePCR_45C_MT_A_4_.fastq
A6-45-5	SRS4213688	214644438					A6	A64	DePCR	45C	MT	A	5	A64_DePCR_45C_MT_A_5_.fastq	A6-45-5	SRS4213688	214644438	214644438_Ankur037-A6-45-5_S37	A64	A6	DePCR	MT	45C	A	5	FLD0037	TGTCGAGTCA	A	2.5	16504	16337	12962	7000	6.34557	3.43946	0.171429	98.7588	A64_DePCR_45C_MT_A_5_.fastq
A6-45-6	SRS4213689	214657446					A6	A64	DePCR	45C	MT	A	6	A64_DePCR_45C_MT_A_6_.fastq	A6-45-6	SRS4213689	214657446	214657446_Ankur038-A6-45-6_S38	A64	A6	DePCR	MT	45C	A	6	FLD0038	GTCTACTGTC	A	2.5	22237	22017	17905	7000	5.86515	3.40154	0.428571	103.813	A64_DePCR_45C_MT_A_6_.fastq
A6-45-7	SRS4213539	214653448					A6	A64	DePCR	45C	MT	A	7	A64_DePCR_45C_MT_A_7_.fastq	A6-45-7	SRS4213539	214653448	214653448_Ankur039-A6-45-7_S39	A64	A6	DePCR	MT	45C	A	7	FLD0039	CAGTCAGAGT	A	2.5	16452	16283	13033	7000	6.92719	3.49003	0.257143	96.6418	A64_DePCR_45C_MT_A_7_.fastq
A6-45-8	SRS4213538	214662454					A6	A64	DePCR	45C	MT	A	8	A64_DePCR_45C_MT_A_8_.fastq	A6-45-8	SRS4213538	214662454	214662454_Ankur040-A6-45-8_S40	A64	A6	DePCR	MT	45C	A	8	FLD0040	CGCAGTCTAT	A	2.5	21797	21586	17187	7000	6.6758	3.43699	0.0857143	99.1188	A64_DePCR_45C_MT_A_8_.fastq
A6-55-1	SRS4213537	214648455					A6	A64	DePCR	55C	MT	A	1	A64_DePCR_55C_MT_A_1_.fastq	A6-55-1	SRS4213537	214648455	214648455_Ankur161-A6-55-1_S161	A64	A6	DePCR	MT	55C	A	1	FLD0225	TGGTGCTGGA	A	2.5	26257	25975	20454	7000	3.67586	2.74946	0.2	145.845	A64_DePCR_55C_MT_A_1_.fastq
A6-55-2	SRS4213536	214659463					A6	A64	DePCR	55C	MT	A	2	A64_DePCR_55C_MT_A_2_.fastq	A6-55-2	SRS4213536	214659463	214659463_Ankur162-A6-55-2_S162	A64	A6	DePCR	MT	55C	A	2	FLD0226	TATGGTAAGG	A	2.5	31581	31251	25102	7000	3.62076	2.73584	0.142857	146.485	A64_DePCR_55C_MT_A_2_.fastq
A6-55-3	SRS4213535	214646471					A6	A64	DePCR	55C	MT	A	3	A64_DePCR_55C_MT_A_3_.fastq	A6-55-3	SRS4213535	214646471	214646471_Ankur163-A6-55-3_S163	A64	A6	DePCR	MT	55C	A	3	FLD0227	GTTCGATTGT	A	2.5	38524	38134	31113	7000	3.73912	2.78809	0.228571	144.983	A64_DePCR_55C_MT_A_3_.fastq
A6-55-4	SRS4213534	214657467					A6	A64	DePCR	55C	MT	A	4	A64_DePCR_55C_MT_A_4_.fastq	A6-55-4	SRS4213534	214657467	214657467_Ankur164-A6-55-4_S164	A64	A6	DePCR	MT	55C	A	4	FLD0228	GGTAGAATGA	A	2.5	35956	35599	28708	7000	3.76153	2.81336	0.171429	144.068	A64_DePCR_55C_MT_A_4_.fastq
A6-55-5	SRS4213533	214660466					A6	A64	DePCR	55C	MT	A	5	A64_DePCR_55C_MT_A_5_.fastq	A6-55-5	SRS4213533	214660466	214660466_Ankur165-A6-55-5_S165	A64	A6	DePCR	MT	55C	A	5	FLD0229	TTCTCATCGT	A	2.5	28500	28238	22994	7000	3.67392	2.74617	0.142857	146.266	A64_DePCR_55C_MT_A_5_.fastq
A6-55-6	SRS4213532	214648456					A6	A64	DePCR	55C	MT	A	6	A64_DePCR_55C_MT_A_6_.fastq	A6-55-6	SRS4213532	214648456	214648456_Ankur166-A6-55-6_S166	A64	A6	DePCR	MT	55C	A	6	FLD0230	CTCAATCGTA	A	2.5	28160	27915	22717	7000	3.58119	2.75748	0.114286	147.099	A64_DePCR_55C_MT_A_6_.fastq
A6-55-7	SRS4213372	214652466					A6	A64	DePCR	55C	MT	A	7	A64_DePCR_55C_MT_A_7_.fastq	A6-55-7	SRS4213372	214652466	214652466_Ankur167-A6-55-7_S167	A64	A6	DePCR	MT	55C	A	7	FLD0231	CGCTAATGTA	A	2.5	31353	31075	25164	7000	3.65859	2.71375	0.542857	146.816	A64_DePCR_55C_MT_A_7_.fastq
A6-55-8	SRS4213540	214664451					A6	A64	DePCR	55C	MT	A	8	A64_DePCR_55C_MT_A_8_.fastq	A6-55-8	SRS4213540	214664451	214664451_Ankur168-A6-55-8_S168	A64	A6	DePCR	MT	55C	A	8	FLD0232	GCGTCTGAAT	A	2.5	40228	39842	32369	7000	3.72007	2.7661	0.257143	145.343	A64_DePCR_55C_MT_A_8_.fastq
A6S-45-1	SRS4213334	217231264					A6	A64	TAS	45C	MT	A	1	A64_TAS_45C_MT_A_1_.fastq	A6S-45-1	SRS4213334	217231264	217231264_Ankur033-A6S-45-1_S33	A64	A6	TAS	MT	45C	A	1	FLD0129	CTGATGCAGA	A	2.5	19692	19594	17085	7000	21.8768	4.04009	0.0285714	43.426	A64_TAS_45C_MT_A_1_.fastq
A6S-45-2	SRS4213335	217244130					A6	A64	TAS	45C	MT	A	2	A64_TAS_45C_MT_A_2_.fastq	A6S-45-2	SRS4213335	217244130	217244130_Ankur034-A6S-45-2_S34	A64	A6	TAS	MT	45C	A	2	FLD0130	GTGACGTACG	A	2.5	18240	18152	15737	7000	22.5691	4.03594	0.0285714	42.561	A64_TAS_45C_MT_A_2_.fastq
A6S-45-3	SRS4213332	217246062					A6	A64	TAS	45C	MT	A	3	A64_TAS_45C_MT_A_3_.fastq	A6S-45-3	SRS4213332	217246062	217246062_Ankur035-A6S-45-3_S35	A64	A6	TAS	MT	45C	A	3	FLD0131	CGACGCTGAT	A	2.5	20266	20166	17728	7000	22.7434	4.04704	0.0285714	42.896	A64_TAS_45C_MT_A_3_.fastq
A6S-45-4	SRS4213333	217232228					A6	A64	TAS	45C	MT	A	4	A64_TAS_45C_MT_A_4_.fastq	A6S-45-4	SRS4213333	217232228	217232228_Ankur036-A6S-45-4_S36	A64	A6	TAS	MT	45C	A	4	FLD0132	CTACGATCAG	A	2.5	19419	19320	16974	7000	24.3172	4.04149	0.0571429	43.2225	A64_TAS_45C_MT_A_4_.fastq
A6S-45-5	SRS4213338	217229262					A6	A64	TAS	45C	MT	A	5	A64_TAS_45C_MT_A_5_.fastq	A6S-45-5	SRS4213338	217229262	217229262_Ankur037-A6S-45-5_S37	A64	A6	TAS	MT	45C	A	5	FLD0133	GCACTAGACA	A	2.5	22448	22333	19724	7000	21.9048	4.03056	0.0285714	43.5161	A64_TAS_45C_MT_A_5_.fastq
A6S-45-6	SRS4213339	217243143					A6	A64	TAS	45C	MT	A	6	A64_TAS_45C_MT_A_6_.fastq	A6S-45-6	SRS4213339	217243143	217243143_Ankur038-A6S-45-6_S38	A64	A6	TAS	MT	45C	A	6	FLD0134	CTAGCAGATG	A	2.5	20583	20490	17924	7000	26.6691	4.04257	0.0285714	42.3784	A64_TAS_45C_MT_A_6_.fastq
A6S-45-7	SRS4213336	217245127					A6	A64	TAS	45C	MT	A	7	A64_TAS_45C_MT_A_7_.fastq	A6S-45-7	SRS4213336	217245127	217245127_Ankur039-A6S-45-7_S39	A64	A6	TAS	MT	45C	A	7	FLD0135	CATGATACGC	A	2.5	18434	18346	15717	7000	22.237	4.03209	0.0571429	43.94	A64_TAS_45C_MT_A_7_.fastq
A6S-45-8	SRS4213337	217246064					A6	A64	TAS	45C	MT	A	8	A64_TAS_45C_MT_A_8_.fastq	A6S-45-8	SRS4213337	217246064	217246064_Ankur040-A6S-45-8_S40	A64	A6	TAS	MT	45C	A	8	FLD0136	GCAGCTGTCA	A	2.5	18760	18664	16357	7000	22.6755	4.03536	0.0285714	42.6719	A64_TAS_45C_MT_A_8_.fastq
A6S-55-1	SRS4213330	217229274					A6	A64	TAS	55C	MT	A	1	A64_TAS_55C_MT_A_1_.fastq	A6S-55-1	SRS4213330	217229274	217229274_Ankur073-A6S-55-1_S73	A64	A6	TAS	MT	55C	A	1	FLD0169	ACATAGTATC	A	2.5	22380	22259	19747	7000	19.8796	4.01425	0.285714	45.1952	A64_TAS_55C_MT_A_1_.fastq
A6S-55-2	SRS4213331	217237227					A6	A64	TAS	55C	MT	A	2	A64_TAS_55C_MT_A_2_.fastq	A6S-55-2	SRS4213331	217237227	217237227_Ankur074-A6S-55-2_S74	A64	A6	TAS	MT	55C	A	2	FLD0170	ATGTATAGTC	A	2.5	21187	21084	18751	7000	19.2124	4.02471	0.0857143	43.942	A64_TAS_55C_MT_A_2_.fastq
A6S-55-3	SRS4213483	217249037					A6	A64	TAS	55C	MT	A	3	A64_TAS_55C_MT_A_3_.fastq	A6S-55-3	SRS4213483	217249037	217249037_Ankur075-A6S-55-3_S75	A64	A6	TAS	MT	55C	A	3	FLD0171	ACAGTCATAT	A	2.5	21662	21546	19066	7000	19.6591	4.02227	0	45.1575	A64_TAS_55C_MT_A_3_.fastq
A6S-55-4	SRS4213482	217246073					A6	A64	TAS	55C	MT	A	4	A64_TAS_55C_MT_A_4_.fastq	A6S-55-4	SRS4213482	217246073	217246073_Ankur076-A6S-55-4_S76	A64	A6	TAS	MT	55C	A	4	FLD0172	ACATATACGT	A	2.5	20973	20838	18406	7000	20.0957	4.02932	0	44.7547	A64_TAS_55C_MT_A_4_.fastq
A6S-55-5	SRS4213485	217247053					A6	A64	TAS	55C	MT	A	5	A64_TAS_55C_MT_A_5_.fastq	A6S-55-5	SRS4213485	217247053	217247053_Ankur077-A6S-55-5_S77	A64	A6	TAS	MT	55C	A	5	FLD0173	AGCATCTATA	A	2.5	20555	20458	18057	7000	17.9331	4.01541	0.0857143	45.1608	A64_TAS_55C_MT_A_5_.fastq
A6S-55-6	SRS4213484	217232242					A6	A64	TAS	55C	MT	A	6	A64_TAS_55C_MT_A_6_.fastq	A6S-55-6	SRS4213484	217232242	217232242_Ankur078-A6S-55-6_S78	A64	A6	TAS	MT	55C	A	6	FLD0174	AGACTATATC	A	2.5	20963	20862	18480	7000	20.1835	4.0191	0.0571429	44.5784	A64_TAS_55C_MT_A_6_.fastq
A6S-55-7	SRS4213487	217229275					A6	A64	TAS	55C	MT	A	7	A64_TAS_55C_MT_A_7_.fastq	A6S-55-7	SRS4213487	217229275	217229275_Ankur079-A6S-55-7_S79	A64	A6	TAS	MT	55C	A	7	FLD0175	CAGCATCTAG	A	2.5	17446	17357	15319	7000	19.6885	4.02269	0.0571429	44.8792	A64_TAS_55C_MT_A_7_.fastq
A6S-55-8	SRS4213486	217239216					A6	A64	TAS	55C	MT	A	8	A64_TAS_55C_MT_A_8_.fastq	A6S-55-8	SRS4213486	217239216	217239216_Ankur080-A6S-55-8_S80	A64	A6	TAS	MT	55C	A	8	FLD0176	CGAGACGACA	A	2.5	16179	16090	14031	7000	18.974	4.02558	0	46.0311	A64_TAS_55C_MT_A_8_.fastq
B1-45-1	SRS4213720	214659450					B1	B01	DePCR	45C	MT	B	1	B01_DePCR_45C_MT_B_1_.fastq	B1-45-1	SRS4213720	214659450	214659450_Ankur041-B1-45-1_S41	B01	B1	DePCR	MT	45C	B	1	FLD0041	GTATGAGCAC	B	2.5	40846	40394	32793	7000	6.02748	0.27173	22.2571	0	B01_DePCR_45C_MT_B_1_.fastq
B1-45-2	SRS4213721	214660449					B1	B01	DePCR	45C	MT	B	2	B01_DePCR_45C_MT_B_2_.fastq	B1-45-2	SRS4213721	214660449	214660449_Ankur042-B1-45-2_S42	B01	B1	DePCR	MT	45C	B	2	FLD0042	CGAGTGCTGT	B	2.5	24913	24621	19776	7000	6.21089	0.265982	22.8857	0	B01_DePCR_45C_MT_B_2_.fastq
B1-45-3	SRS4213717	214661450					B1	B01	DePCR	45C	MT	B	3	B01_DePCR_45C_MT_B_3_.fastq	B1-45-3	SRS4213717	214661450	214661450_Ankur043-B1-45-3_S43	B01	B1	DePCR	MT	45C	B	3	FLD0043	TATAGCACGC	B	2.5	20629	20386	15893	7000	6.08271	0.27872	20.4571	0	B01_DePCR_45C_MT_B_3_.fastq
B1-45-4	SRS4213719	214646449					B1	B01	DePCR	45C	MT	B	4	B01_DePCR_45C_MT_B_4_.fastq	B1-45-4	SRS4213719	214646449	214646449_Ankur044-B1-45-4_S44	B01	B1	DePCR	MT	45C	B	4	FLD0044	TCATGCGCGA	B	2.5	22712	22467	17661	7000	6.20807	0.23506	22	0	B01_DePCR_45C_MT_B_4_.fastq
B1-45-5	SRS4213716	214654444					B1	B01	DePCR	45C	MT	B	5	B01_DePCR_45C_MT_B_5_.fastq	B1-45-5	SRS4213716	214654444	214654444_Ankur045-B1-45-5_S45	B01	B1	DePCR	MT	45C	B	5	FLD0045	TATGCGCTGC	B	2.5	18330	18131	13627	7000	5.57117	0.286635	23.6286	0	B01_DePCR_45C_MT_B_5_.fastq
B1-45-6	SRS4213718	214647442					B1	B01	DePCR	45C	MT	B	6	B01_DePCR_45C_MT_B_6_.fastq	B1-45-6	SRS4213718	214647442	214647442_Ankur046-B1-45-6_S46	B01	B1	DePCR	MT	45C	B	6	FLD0046	TCTCTGTGCA	B	2.5	28169	27863	22536	7000	6.50813	0.278966	21	0	B01_DePCR_45C_MT_B_6_.fastq
B1-45-7	SRS4213714	214647443					B1	B01	DePCR	45C	MT	B	7	B01_DePCR_45C_MT_B_7_.fastq	B1-45-7	SRS4213714	214647443	214647443_Ankur047-B1-45-7_S47	B01	B1	DePCR	MT	45C	B	7	FLD0047	CTATCGCGTG	B	2.5	18120	17903	14400	7000	6.21248	0.280698	23.7143	0	B01_DePCR_45C_MT_B_7_.fastq
B1-45-8	SRS4213715	214650446					B1	B01	DePCR	45C	MT	B	8	B01_DePCR_45C_MT_B_8_.fastq	B1-45-8	SRS4213715	214650446	214650446_Ankur048-B1-45-8_S48	B01	B1	DePCR	MT	45C	B	8	FLD0048	TACGCTGCTG	B	2.5	27804	27506	22124	7000	6.16143	0.255788	23.4286	0	B01_DePCR_45C_MT_B_8_.fastq
B1-55-1	SRS4213712	214647462					B1	B01	DePCR	55C	MT	B	1	B01_DePCR_55C_MT_B_1_.fastq	B1-55-1	SRS4213712	214647462	214647462_Ankur169-B1-55-1_S169	B01	B1	DePCR	MT	55C	B	1	FLD0233	TTCTGTTGCC	B	2.5	29914	29586	24123	7000	5.64304	0.379535	22.9714	0	B01_DePCR_55C_MT_B_1_.fastq
B1-55-2	SRS4213713	214653463					B1	B01	DePCR	55C	MT	B	2	B01_DePCR_55C_MT_B_2_.fastq	B1-55-2	SRS4213713	214653463	214653463_Ankur170-B1-55-2_S170	B01	B1	DePCR	MT	55C	B	2	FLD0234	TTGTCCTTGC	B	2.5	31551	31203	25098	7000	5.39891	0.390619	23.1714	0	B01_DePCR_55C_MT_B_2_.fastq
B1-55-3	SRS4213545	214645452					B1	B01	DePCR	55C	MT	B	3	B01_DePCR_55C_MT_B_3_.fastq	B1-55-3	SRS4213545	214645452	214645452_Ankur171-B1-55-3_S171	B01	B1	DePCR	MT	55C	B	3	FLD0235	CCTGTGTAGA	B	2.5	31728	31402	25736	7000	5.83099	0.347802	22.3143	0	B01_DePCR_55C_MT_B_3_.fastq
B1-55-4	SRS4213734	214647464					B1	B01	DePCR	55C	MT	B	4	B01_DePCR_55C_MT_B_4_.fastq	B1-55-4	SRS4213734	214647464	214647464_Ankur172-B1-55-4_S172	B01	B1	DePCR	MT	55C	B	4	FLD0236	GATAAGAAGG	B	2.5	44053	43556	35776	7000	5.51701	0.336154	22.6571	0	B01_DePCR_55C_MT_B_4_.fastq
B1-55-5	SRS4213572	214653464					B1	B01	DePCR	55C	MT	B	5	B01_DePCR_55C_MT_B_5_.fastq	B1-55-5	SRS4213572	214653464	214653464_Ankur173-B1-55-5_S173	B01	B1	DePCR	MT	55C	B	5	FLD0237	CAGGTCACAT	B	2.5	25388	25110	20526	7000	5.57544	0.372065	24.0286	0	B01_DePCR_55C_MT_B_5_.fastq
B1-55-6	SRS4213570	214644455					B1	B01	DePCR	55C	MT	B	6	B01_DePCR_55C_MT_B_6_.fastq	B1-55-6	SRS4213570	214644455	214644455_Ankur174-B1-55-6_S174	B01	B1	DePCR	MT	55C	B	6	FLD0238	GCCATGTCAT	B	2.5	49358	48807	40055	7000	5.48754	0.329298	23.0571	0	B01_DePCR_55C_MT_B_6_.fastq
B1-55-7	SRS4213565	214648458					B1	B01	DePCR	55C	MT	B	7	B01_DePCR_55C_MT_B_7_.fastq	B1-55-7	SRS4213565	214648458	214648458_Ankur175-B1-55-7_S175	B01	B1	DePCR	MT	55C	B	7	FLD0239	TCTGCCTATA	B	2.5	42913	42467	34819	7000	5.56348	0.382275	23.8857	0	B01_DePCR_55C_MT_B_7_.fastq
B1-55-8	SRS4213564	214662469					B1	B01	DePCR	55C	MT	B	8	B01_DePCR_55C_MT_B_8_.fastq	B1-55-8	SRS4213564	214662469	214662469_Ankur176-B1-55-8_S176	B01	B1	DePCR	MT	55C	B	8	FLD0240	CTTAGTTCGC	B	2.5	30678	30345	24199	7000	5.56595	0.37011	23.7143	0	B01_DePCR_55C_MT_B_8_.fastq
B1S-45-1	SRS4213489	217236223					B1	B01	TAS	45C	MT	B	1	B01_TAS_45C_MT_B_1_.fastq	B1S-45-1	SRS4213489	217236223	217236223_Ankur081-B1S-45-1_S99	B01	B1	TAS	MT	45C	B	1	FLD0193	TTGTTGCTGT	B	2.5	31891	31751	28514	7000	7.40248	0.0587268	45	0	B01_TAS_45C_MT_B_1_.fastq
B1S-45-2	SRS4213488	217244143					B1	B01	TAS	45C	MT	B	2	B01_TAS_45C_MT_B_2_.fastq	B1S-45-2	SRS4213488	217244143	217244143_Ankur082-B1S-45-2_S100	B01	B1	TAS	MT	45C	B	2	FLD0194	GTGTGGTTGT	B	2.5	27795	27644	24885	7000	6.70875	0.0526268	46.7143	0	B01_TAS_45C_MT_B_2_.fastq
B1S-45-3	SRS4213481	217244144					B1	B01	TAS	45C	MT	B	3	B01_TAS_45C_MT_B_3_.fastq	B1S-45-3	SRS4213481	217244144	217244144_Ankur083-B1S-45-3_S101	B01	B1	TAS	MT	45C	B	3	FLD0195	TAGGTGGAAT	B	2.5	30980	30836	27749	7000	6.62568	0.0544558	44.6286	0	B01_TAS_45C_MT_B_3_.fastq
B1S-45-4	SRS4213480	217240186					B1	B01	TAS	45C	MT	B	4	B01_TAS_45C_MT_B_4_.fastq	B1S-45-4	SRS4213480	217240186	217240186_Ankur084-B1S-45-4_S102	B01	B1	TAS	MT	45C	B	4	FLD0196	TGTAGGTGGA	B	2.5	28957	28836	25875	7000	6.97413	0.0681645	44.7429	0	B01_TAS_45C_MT_B_4_.fastq
B1S-45-5	SRS4213546	217237232					B1	B01	TAS	45C	MT	B	5	B01_TAS_45C_MT_B_5_.fastq	B1S-45-5	SRS4213546	217237232	217237232_Ankur085-B1S-45-5_S103	B01	B1	TAS	MT	45C	B	5	FLD0197	TTAGTGGTGA	B	2.5	27494	27373	24519	7000	6.61778	0.0700153	45.4	0	B01_TAS_45C_MT_B_5_.fastq
B1S-45-6	SRS4213547	217246076					B1	B01	TAS	45C	MT	B	6	B01_TAS_45C_MT_B_6_.fastq	B1S-45-6	SRS4213547	217246076	217246076_Ankur086-B1S-45-6_S104	B01	B1	TAS	MT	45C	B	6	FLD0198	GTGAAGGTAA	B	2.5	27184	27070	24282	7000	6.84563	0.0752634	46.8286	0	B01_TAS_45C_MT_B_6_.fastq
B1S-45-7	SRS4213548	217231276					B1	B01	TAS	45C	MT	B	7	B01_TAS_45C_MT_B_7_.fastq	B1S-45-7	SRS4213548	217231276	217231276_Ankur087-B1S-45-7_S105	B01	B1	TAS	MT	45C	B	7	FLD0199	TGTTGTGGTA	B	2.5	27739	27607	24836	7000	6.90232	0.0547247	46.0857	0	B01_TAS_45C_MT_B_7_.fastq
B1S-45-8	SRS4213549	217231277					B1	B01	TAS	45C	MT	B	8	B01_TAS_45C_MT_B_8_.fastq	B1S-45-8	SRS4213549	217231277	217231277_Ankur088-B1S-45-8_S106	B01	B1	TAS	MT	45C	B	8	FLD0200	GTTGATGAGT	B	2.5	32569	32431	29359	7000	7.20384	0.0594445	45.6	0	B01_TAS_45C_MT_B_8_.fastq
B1S-55-1	SRS4213550	217245168					B1	B01	TAS	55C	MT	B	1	B01_TAS_55C_MT_B_1_.fastq	B1S-55-1	SRS4213550	217245168	217245168_Ankur169-B1S-55-1_S187	B01	B1	TAS	MT	55C	B	1	FLD0289	CACTGCTTGA	B	2.5	28100	27979	25225	7000	6.12526	0.063077	54.5714	0	B01_TAS_55C_MT_B_1_.fastq
B1S-55-2	SRS4213551	217238210					B1	B01	TAS	55C	MT	B	2	B01_TAS_55C_MT_B_2_.fastq	B1S-55-2	SRS4213551	217238210	217238210_Ankur170-B1S-55-2_S188	B01	B1	TAS	MT	55C	B	2	FLD0290	TCTAGCGTGG	B	2.5	30343	30201	26900	7000	5.78249	0.0518908	55.3143	0	B01_TAS_55C_MT_B_2_.fastq
B1S-55-3	SRS4213552	217232270					B1	B01	TAS	55C	MT	B	3	B01_TAS_55C_MT_B_3_.fastq	B1S-55-3	SRS4213552	217232270	217232270_Ankur171-B1S-55-3_S189	B01	B1	TAS	MT	55C	B	3	FLD0291	GCATAATCGC	B	2.5	30101	29968	26800	7000	5.89139	0.0632296	56	0	B01_TAS_55C_MT_B_3_.fastq
B1S-55-4	SRS4213553	217239243					B1	B01	TAS	55C	MT	B	4	B01_TAS_55C_MT_B_4_.fastq	B1S-55-4	SRS4213553	217239243	217239243_Ankur172-B1S-55-4_S190	B01	B1	TAS	MT	55C	B	4	FLD0292	GTCGTAACAC	B	2.5	35040	34905	31510	7000	5.94582	0.0674694	56.4	0	B01_TAS_55C_MT_B_4_.fastq
B1S-55-5	SRS4213554	217245169					B1	B01	TAS	55C	MT	B	5	B01_TAS_55C_MT_B_5_.fastq	B1S-55-5	SRS4213554	217245169	217245169_Ankur173-B1S-55-5_S191	B01	B1	TAS	MT	55C	B	5	FLD0293	GAGATTGCTA	B	2.5	31919	31784	28519	7000	6.02945	0.0562487	57.2857	0	B01_TAS_55C_MT_B_5_.fastq
B1S-55-6	SRS4213555	217245170					B1	B01	TAS	55C	MT	B	6	B01_TAS_55C_MT_B_6_.fastq	B1S-55-6	SRS4213555	217245170	217245170_Ankur174-B1S-55-6_S192	B01	B1	TAS	MT	55C	B	6	FLD0294	GGACAGATGG	B	2.5	30967	30852	27817	7000	5.95724	0.0532557	55.2	0	B01_TAS_55C_MT_B_6_.fastq
B1S-55-7	SRS4213710	217242176					B1	B01	TAS	55C	MT	B	7	B01_TAS_55C_MT_B_7_.fastq	B1S-55-7	SRS4213710	217242176	217242176_Ankur175-B1S-55-7_S193	B01	B1	TAS	MT	55C	B	7	FLD0295	CTTACGTTGC	B	2.5	27753	27637	24684	7000	5.77069	0.0754293	57.8	0	B01_TAS_55C_MT_B_7_.fastq
B1S-55-8	SRS4213709	217249068					B1	B01	TAS	55C	MT	B	8	B01_TAS_55C_MT_B_8_.fastq	B1S-55-8	SRS4213709	217249068	217249068_Ankur176-B1S-55-8_S194	B01	B1	TAS	MT	55C	B	8	FLD0296	GTGTTCGGTC	B	2.5	27031	26914	24068	7000	6.1641	0.0599537	55.1714	0	B01_TAS_55C_MT_B_8_.fastq
B3-45-1	SRS4213579	214659453					B3	B09	DePCR	45C	MT	B	1	B09_DePCR_45C_MT_B_1_.fastq	B3-45-1	SRS4213579	214659453	214651449_Ankur049-B2-45-1_S49	B09	B3	DePCR	MT	45C	B	1	FLD0049	CTGCATGATC	B	2.5	14618	14462	11611	7000	2.43514	2.33065	16	38.0405	B09_DePCR_45C_MT_B_1_.fastq
B3-45-2	SRS4213577	214662455					B3	B09	DePCR	45C	MT	B	2	B09_DePCR_45C_MT_B_2_.fastq	B3-45-2	SRS4213577	214662455	214656455_Ankur050-B2-45-2_S50	B09	B3	DePCR	MT	45C	B	2	FLD0050	CGCGTATCAT	B	2.5	18443	18247	14675	7000	1.9422	2.33657	17.7143	36.748	B09_DePCR_45C_MT_B_2_.fastq
B3-45-3	SRS4213573	214639447					B3	B09	DePCR	45C	MT	B	3	B09_DePCR_45C_MT_B_3_.fastq	B3-45-3	SRS4213573	214639447	214652452_Ankur051-B2-45-3_S51	B09	B3	DePCR	MT	45C	B	3	FLD0051	GTATCTCTCG	B	2.5	18010	17789	14428	7000	1.88875	2.31734	18.7714	34.8517	B09_DePCR_45C_MT_B_3_.fastq
B3-45-4	SRS4213571	214646454					B3	B09	DePCR	45C	MT	B	4	B09_DePCR_45C_MT_B_4_.fastq	B3-45-4	SRS4213571	214646454	214645443_Ankur052-B2-45-4_S52	B09	B3	DePCR	MT	45C	B	4	FLD0052	GCTCATATGC	B	2.5	26451	26108	20756	7000	1.97746	2.33857	18.3714	35.7225	B09_DePCR_45C_MT_B_4_.fastq
B3-45-5	SRS4213575	214644439					B3	B09	DePCR	45C	MT	B	5	B09_DePCR_45C_MT_B_5_.fastq	B3-45-5	SRS4213575	214644439	214653450_Ankur053-B2-45-5_S53	B09	B3	DePCR	MT	45C	B	5	FLD0053	CACTATGTCG	B	2.5	21476	21258	17103	7000	2.27487	2.34948	17.8571	39.0055	B09_DePCR_45C_MT_B_5_.fastq
B3-45-6	SRS4213574	214648444					B3	B09	DePCR	45C	MT	B	6	B09_DePCR_45C_MT_B_6_.fastq	B3-45-6	SRS4213574	214648444	214647445_Ankur054-B2-45-6_S54	B09	B3	DePCR	MT	45C	B	6	FLD0054	TAGCGCGTAG	B	2.5	14709	14535	11547	7000	2.32847	2.32425	19.4	36.3251	B09_DePCR_45C_MT_B_6_.fastq
B3-45-7	SRS4213581	214648445					B3	B09	DePCR	45C	MT	B	7	B09_DePCR_45C_MT_B_7_.fastq	B3-45-7	SRS4213581	214648445	214650448_Ankur055-B2-45-7_S55	B09	B3	DePCR	MT	45C	B	7	FLD0055	CGTCACAGTA	B	2.5	18340	18122	14748	7000	2.48172	2.34552	19.2286	39.3024	B09_DePCR_45C_MT_B_7_.fastq
B3-45-8	SRS4213580	214644440					B3	B09	DePCR	45C	MT	B	8	B09_DePCR_45C_MT_B_8_.fastq	B3-45-8	SRS4213580	214644440	214660452_Ankur056-B2-45-8_S56	B09	B3	DePCR	MT	45C	B	8	FLD0056	TCGCGTGAGA	B	2.5	21240	21008	16693	7000	2.02435	2.33152	16.6286	35.0275	B09_DePCR_45C_MT_B_8_.fastq
B3-55-1	SRS4213722	214645454					B3	B09	DePCR	55C	MT	B	1	B09_DePCR_55C_MT_B_1_.fastq	B3-55-1	SRS4213722	214645454	214650465_Ankur177-B2-55-1_S177	B09	B3	DePCR	MT	55C	B	1	FLD0241	CGTAATGAGC	B	2.5	36455	36091	28446	7000	0.826762	2.31048	16	43.5628	B09_DePCR_55C_MT_B_1_.fastq
B3-55-2	SRS4213723	214662470					B3	B09	DePCR	55C	MT	B	2	B09_DePCR_55C_MT_B_2_.fastq	B3-55-2	SRS4213723	214662470	214657468_Ankur178-B2-55-2_S178	B09	B3	DePCR	MT	55C	B	2	FLD0242	TTGCTTAGTC	B	2.5	37685	37337	30418	7000	0.868283	2.30562	15.9429	41.2874	B09_DePCR_55C_MT_B_2_.fastq
B3-55-3	SRS4213724	214653465					B3	B09	DePCR	55C	MT	B	3	B09_DePCR_55C_MT_B_3_.fastq	B3-55-3	SRS4213724	214653465	214644457_Ankur179-B2-55-3_S179	B09	B3	DePCR	MT	55C	B	3	FLD0243	TCTTGTTCAC	B	2.5	35905	35581	28833	7000	0.822886	2.3207	12.7714	41.982	B09_DePCR_55C_MT_B_3_.fastq
B3-55-4	SRS4213725	214663452					B3	B09	DePCR	55C	MT	B	4	B09_DePCR_55C_MT_B_4_.fastq	B3-55-4	SRS4213725	214663452	214656468_Ankur180-B2-55-4_S180	B09	B3	DePCR	MT	55C	B	4	FLD0244	GTGGCTTCGT	B	2.5	45125	44601	35516	7000	0.814636	2.31158	16.6571	42.0047	B09_DePCR_55C_MT_B_4_.fastq
B3-55-5	SRS4213727	214645457					B3	B09	DePCR	55C	MT	B	5	B09_DePCR_55C_MT_B_5_.fastq	B3-55-5	SRS4213727	214645457	214648459_Ankur181-B2-55-5_S181	B09	B3	DePCR	MT	55C	B	5	FLD0245	TGTTCGATAG	B	2.5	39219	38857	31107	7000	0.833399	2.29308	13.9143	41.4497	B09_DePCR_55C_MT_B_5_.fastq
B3-55-6	SRS4213726	214645458					B3	B09	DePCR	55C	MT	B	6	B09_DePCR_55C_MT_B_6_.fastq	B3-55-6	SRS4213726	214645458	214654456_Ankur182-B2-55-6_S182	B09	B3	DePCR	MT	55C	B	6	FLD0246	TCATTCAGTG	B	2.5	38241	37871	30768	7000	0.813551	2.30559	14.0571	41.9255	B09_DePCR_55C_MT_B_6_.fastq
B3-55-7	SRS4213728	214651462					B3	B09	DePCR	55C	MT	B	7	B09_DePCR_55C_MT_B_7_.fastq	B3-55-7	SRS4213728	214651462	214660467_Ankur183-B2-55-7_S183	B09	B3	DePCR	MT	55C	B	7	FLD0247	GTGGAGAGCT	B	2.5	45082	44649	36160	7000	0.795557	2.29247	14.9714	42.706	B09_DePCR_55C_MT_B_7_.fastq
B3-55-8	SRS4213729	214663453					B3	B09	DePCR	55C	MT	B	8	B09_DePCR_55C_MT_B_8_.fastq	B3-55-8	SRS4213729	214663453	214646474_Ankur184-B2-55-8_S184	B09	B3	DePCR	MT	55C	B	8	FLD0248	GTAGAAGTGG	B	2.5	48743	48270	38741	7000	0.767869	2.30311	16.4571	41.6753	B09_DePCR_55C_MT_B_8_.fastq
B3S-45-1	SRS4213282	217241187					B3	B09	TAS	45C	MT	B	1	B09_TAS_45C_MT_B_1_.fastq	B3S-45-1	SRS4213282	217241187	217229278_Ankur089-B2S-45-1_S107	B09	B3	TAS	MT	45C	B	1	FLD0201	GGTCAGTGTA	B	2.5	29476	29330	26283	7000	6.07634	2.33354	45.8286	20.6334	B09_TAS_45C_MT_B_1_.fastq
B3S-45-2	SRS4213283	217247058					B3	B09	TAS	45C	MT	B	2	B09_TAS_45C_MT_B_2_.fastq	B3S-45-2	SRS4213283	217247058	217244147_Ankur090-B2S-45-2_S108	B09	B3	TAS	MT	45C	B	2	FLD0202	GTAATGGAGT	B	2.5	26804	26643	23933	7000	6.46539	2.3336	44.3714	19.7539	B09_TAS_45C_MT_B_2_.fastq
B3S-45-3	SRS4213403	217243159					B3	B09	TAS	45C	MT	B	3	B09_TAS_45C_MT_B_3_.fastq	B3S-45-3	SRS4213403	217243159	217236229_Ankur091-B2S-45-3_S109	B09	B3	TAS	MT	45C	B	3	FLD0203	CTCGTTATTC	B	2.5	25757	25632	22960	7000	6.43597	2.34306	44.9429	20.3935	B09_TAS_45C_MT_B_3_.fastq
B3S-45-4	SRS4213402	217241188					B3	B09	TAS	45C	MT	B	4	B09_TAS_45C_MT_B_4_.fastq	B3S-45-4	SRS4213402	217241188	217241185_Ankur092-B2S-45-4_S110	B09	B3	TAS	MT	45C	B	4	FLD0204	GGAAGTAAGG	B	2.5	27800	27654	24753	7000	6.29532	2.34298	45.5429	19.7172	B09_TAS_45C_MT_B_4_.fastq
B3S-45-5	SRS4213405	217249044					B3	B09	TAS	45C	MT	B	5	B09_TAS_45C_MT_B_5_.fastq	B3S-45-5	SRS4213405	217249044	217229280_Ankur093-B2S-45-5_S111	B09	B3	TAS	MT	45C	B	5	FLD0205	CGGTGTGTGT	B	2.5	27912	27762	24656	7000	6.16448	2.31842	45.8857	20.4668	B09_TAS_45C_MT_B_5_.fastq
B3S-45-6	SRS4213404	217249045					B3	B09	TAS	45C	MT	B	6	B09_TAS_45C_MT_B_6_.fastq	B3S-45-6	SRS4213404	217249045	217244148_Ankur094-B2S-45-6_S112	B09	B3	TAS	MT	45C	B	6	FLD0206	CGTCTTCTTA	B	2.5	27102	26996	24272	7000	6.07359	2.33112	47.2571	20.419	B09_TAS_45C_MT_B_6_.fastq
B3S-45-7	SRS4213399	217241189					B3	B09	TAS	45C	MT	B	7	B09_TAS_45C_MT_B_7_.fastq	B3S-45-7	SRS4213399	217241189	217231282_Ankur095-B2S-45-7_S113	B09	B3	TAS	MT	45C	B	7	FLD0207	TGTGAATCTC	B	2.5	26913	26804	24166	7000	6.07227	2.32943	45.3714	21.3711	B09_TAS_45C_MT_B_7_.fastq
B3S-45-8	SRS4213398	217232254					B3	B09	TAS	45C	MT	B	8	B09_TAS_45C_MT_B_8_.fastq	B3S-45-8	SRS4213398	217232254	217235219_Ankur096-B2S-45-8_S114	B09	B3	TAS	MT	45C	B	8	FLD0208	CTAATCGTGT	B	2.5	28337	28220	25136	7000	6.3541	2.33337	44.6	20.9823	B09_TAS_45C_MT_B_8_.fastq
B3S-55-1	SRS4213401	217236243					B3	B09	TAS	55C	MT	B	1	B09_TAS_55C_MT_B_1_.fastq	B3S-55-1	SRS4213401	217236243	217232272_Ankur177-B2S-55-1_S195	B09	B3	TAS	MT	55C	B	1	FLD0297	CTCAAGAAGC	B	2.5	23860	23739	21067	7000	5.29403	2.35079	28.4571	20.1995	B09_TAS_55C_MT_B_1_.fastq
B3S-55-2	SRS4213400	217240211					B3	B09	TAS	55C	MT	B	2	B09_TAS_55C_MT_B_2_.fastq	B3S-55-2	SRS4213400	217240211	217231297_Ankur178-B2S-55-2_S196	B09	B3	TAS	MT	55C	B	2	FLD0298	TCTCGGATAG	B	2.5	24257	24129	21549	7000	5.32406	2.34816	31.4571	20.2132	B09_TAS_55C_MT_B_2_.fastq
B3S-55-3	SRS4213407	217245174					B3	B09	TAS	55C	MT	B	3	B09_TAS_55C_MT_B_3_.fastq	B3S-55-3	SRS4213407	217245174	217243179_Ankur179-B2S-55-3_S197	B09	B3	TAS	MT	55C	B	3	FLD0299	CTCTGGACGA	B	2.5	25987	25878	23044	7000	5.22716	2.36122	32.8286	19.7388	B09_TAS_55C_MT_B_3_.fastq
B3S-55-4	SRS4213406	217236246					B3	B09	TAS	55C	MT	B	4	B09_TAS_55C_MT_B_4_.fastq	B3S-55-4	SRS4213406	217236246	217245172_Ankur180-B2S-55-4_S198	B09	B3	TAS	MT	55C	B	4	FLD0300	CGAGCATTGT	B	2.5	29077	28959	25847	7000	5.25071	2.34262	30.6571	20.6323	B09_TAS_55C_MT_B_4_.fastq
B3S-55-5	SRS4213515	217244176					B3	B09	TAS	55C	MT	B	5	B09_TAS_55C_MT_B_5_.fastq	B3S-55-5	SRS4213515	217244176	217246098_Ankur181-B2S-55-5_S199	B09	B3	TAS	MT	55C	B	5	FLD0301	CCAAGAAGAA	B	2.5	28880	28710	25561	7000	5.35722	2.3325	34.3429	18.8714	B09_TAS_55C_MT_B_5_.fastq
B3S-55-6	SRS4213517	217238216					B3	B09	TAS	55C	MT	B	6	B09_TAS_55C_MT_B_6_.fastq	B3S-55-6	SRS4213517	217238216	217251042_Ankur182-B2S-55-6_S200	B09	B3	TAS	MT	55C	B	6	FLD0302	TCCTTGTTCT	B	2.5	26160	26056	23530	7000	5.14324	2.34912	32.1429	18.4945	B09_TAS_55C_MT_B_6_.fastq
B3S-55-7	SRS4213518	217241210					B3	B09	TAS	55C	MT	B	7	B09_TAS_55C_MT_B_7_.fastq	B3S-55-7	SRS4213518	217241210	217247085_Ankur183-B2S-55-7_S201	B09	B3	TAS	MT	55C	B	7	FLD0303	GTAACGATGT	B	2.5	27869	27754	24377	7000	5.07249	2.33285	31.4	19.2221	B09_TAS_55C_MT_B_7_.fastq
B3S-55-8	SRS4213519	217243182					B3	B09	TAS	55C	MT	B	8	B09_TAS_55C_MT_B_8_.fastq	B3S-55-8	SRS4213519	217243182	217247086_Ankur184-B2S-55-8_S202	B09	B3	TAS	MT	55C	B	8	FLD0304	TGGACTCAGA	B	2.5	22989	22914	20435	7000	5.0258	2.33329	32.5714	19.8197	B09_TAS_55C_MT_B_8_.fastq
B2-45-1	SRS4213567	214651449					B2	B10	DePCR	45C	MT	B	1	B10_DePCR_45C_MT_B_1_.fastq	B2-45-1	SRS4213567	214651449	214659453_Ankur057-B3-45-1_S57	B10	B2	DePCR	MT	45C	B	1	FLD0057	TACATCGCTG	B	2.5	15185	15058	12093	7000	2.4865	2.27192	18.2286	33.8433	B10_DePCR_45C_MT_B_1_.fastq
B2-45-2	SRS4213566	214656455					B2	B10	DePCR	45C	MT	B	2	B10_DePCR_45C_MT_B_2_.fastq	B2-45-2	SRS4213566	214656455	214662455_Ankur058-B3-45-2_S58	B10	B2	DePCR	MT	45C	B	2	FLD0058	GTGAGAGACA	B	2.5	26630	26377	21461	7000	2.18622	2.24075	20.7429	34.716	B10_DePCR_45C_MT_B_2_.fastq
B2-45-3	SRS4213595	214652452					B2	B10	DePCR	45C	MT	B	3	B10_DePCR_45C_MT_B_3_.fastq	B2-45-3	SRS4213595	214652452	214639447_Ankur059-B3-45-3_S59	B10	B2	DePCR	MT	45C	B	3	FLD0059	GACTGTACGT	B	2.5	17776	17587	14028	7000	1.91455	2.26727	19.1429	35.1985	B10_DePCR_45C_MT_B_3_.fastq
B2-45-4	SRS4213594	214645443					B2	B10	DePCR	45C	MT	B	4	B10_DePCR_45C_MT_B_4_.fastq	B2-45-4	SRS4213594	214645443	214646454_Ankur060-B3-45-4_S60	B10	B2	DePCR	MT	45C	B	4	FLD0060	GCACGTAGCT	B	2.5	19283	19057	15016	7000	1.88747	2.25286	19.4	31.5316	B10_DePCR_45C_MT_B_4_.fastq
B2-45-5	SRS4213434	214653450					B2	B10	DePCR	45C	MT	B	5	B10_DePCR_45C_MT_B_5_.fastq	B2-45-5	SRS4213434	214653450	214644439_Ankur061-B3-45-5_S61	B10	B2	DePCR	MT	45C	B	5	FLD0061	TCACGCTATG	B	2.5	18120	17949	14515	7000	2.35923	2.23906	19.9714	33.8523	B10_DePCR_45C_MT_B_5_.fastq
B2-45-6	SRS4213435	214647445					B2	B10	DePCR	45C	MT	B	6	B10_DePCR_45C_MT_B_6_.fastq	B2-45-6	SRS4213435	214647445	214648444_Ankur062-B3-45-6_S62	B10	B2	DePCR	MT	45C	B	6	FLD0062	CGTACTACGT	B	2.5	11212	11106	8879	7000	2.29894	NA	NA	34.4645	B10_DePCR_45C_MT_B_6_.fastq
B2-45-7	SRS4213432	214650448					B2	B10	DePCR	45C	MT	B	7	B10_DePCR_45C_MT_B_7_.fastq	B2-45-7	SRS4213432	214650448	214648445_Ankur063-B3-45-7_S63	B10	B2	DePCR	MT	45C	B	7	FLD0063	CAGCTGAGTA	B	2.5	25407	25164	20346	7000	2.31405	2.26483	20.8	34.1024	B10_DePCR_45C_MT_B_7_.fastq
B2-45-8	SRS4213433	214660452					B2	B10	DePCR	45C	MT	B	8	B10_DePCR_45C_MT_B_8_.fastq	B2-45-8	SRS4213433	214660452	214644440_Ankur064-B3-45-8_S64	B10	B2	DePCR	MT	45C	B	8	FLD0064	GAGATCAGTC	B	2.5	28880	28619	23159	7000	2.14702	2.25094	16.8286	32.7154	B10_DePCR_45C_MT_B_8_.fastq
B2-55-1	SRS4213430	214650465					B2	B10	DePCR	55C	MT	B	1	B10_DePCR_55C_MT_B_1_.fastq	B2-55-1	SRS4213430	214650465	214645454_Ankur185-B3-55-1_S185	B10	B2	DePCR	MT	55C	B	1	FLD0249	TGGAGCATGT	B	2.5	34582	34257	27632	7000	0.797723	2.21287	15.9143	37.2484	B10_DePCR_55C_MT_B_1_.fastq
B2-55-2	SRS4213431	214657468					B2	B10	DePCR	55C	MT	B	2	B10_DePCR_55C_MT_B_2_.fastq	B2-55-2	SRS4213431	214657468	214662470_Ankur186-B3-55-2_S186	B10	B2	DePCR	MT	55C	B	2	FLD0250	GAAGGAGATA	B	2.5	46421	45968	37436	7000	0.867602	2.2223	11.3714	37.1365	B10_DePCR_55C_MT_B_2_.fastq
B2-55-3	SRS4213428	214644457					B2	B10	DePCR	55C	MT	B	3	B10_DePCR_55C_MT_B_3_.fastq	B2-55-3	SRS4213428	214644457	214653465_Ankur187-B3-55-3_S187	B10	B2	DePCR	MT	55C	B	3	FLD0251	CGAATGTATG	B	2.5	38789	38428	31005	7000	0.8725	2.22934	14.0857	38.6985	B10_DePCR_55C_MT_B_3_.fastq
B2-55-4	SRS4213429	214656468					B2	B10	DePCR	55C	MT	B	4	B10_DePCR_55C_MT_B_4_.fastq	B2-55-4	SRS4213429	214656468	214663452_Ankur188-B3-55-4_S188	B10	B2	DePCR	MT	55C	B	4	FLD0252	TCGTGAATGA	B	2.5	39371	38978	31579	7000	0.887	2.2334	12.8	37.2866	B10_DePCR_55C_MT_B_4_.fastq
B2-55-5	SRS4213442	214648459					B2	B10	DePCR	55C	MT	B	5	B10_DePCR_55C_MT_B_5_.fastq	B2-55-5	SRS4213442	214648459	214645457_Ankur189-B3-55-5_S189	B10	B2	DePCR	MT	55C	B	5	FLD0253	GAATAGCTGA	B	2.5	51336	50874	41058	7000	0.868439	2.21692	15.3143	37.5337	B10_DePCR_55C_MT_B_5_.fastq
B2-55-6	SRS4213443	214654456					B2	B10	DePCR	55C	MT	B	6	B10_DePCR_55C_MT_B_6_.fastq	B2-55-6	SRS4213443	214654456	214645458_Ankur190-B3-55-6_S190	B10	B2	DePCR	MT	55C	B	6	FLD0254	TTGTCACATC	B	2.5	33892	33588	27032	7000	0.859501	2.23683	14.6857	38.298	B10_DePCR_55C_MT_B_6_.fastq
B2-55-7	SRS4213578	214660467					B2	B10	DePCR	55C	MT	B	7	B10_DePCR_55C_MT_B_7_.fastq	B2-55-7	SRS4213578	214660467	214651462_Ankur191-B3-55-7_S191	B10	B2	DePCR	MT	55C	B	7	FLD0255	CTGGAGGCTA	B	2.5	33464	33188	25826	7000	0.873117	2.22454	15.7429	36.7284	B10_DePCR_55C_MT_B_7_.fastq
B2-55-8	SRS4213576	214646474					B2	B10	DePCR	55C	MT	B	8	B10_DePCR_55C_MT_B_8_.fastq	B2-55-8	SRS4213576	214646474	214663453_Ankur192-B3-55-8_S192	B10	B2	DePCR	MT	55C	B	8	FLD0256	TGTCAGCTTA	B	2.5	35977	35680	28959	7000	0.884681	2.23055	15.3714	37.0397	B10_DePCR_55C_MT_B_8_.fastq
B2S-45-1	SRS4213708	217229278					B2	B10	TAS	45C	MT	B	1	B10_TAS_45C_MT_B_1_.fastq	B2S-45-1	SRS4213708	217229278	217241187_Ankur097-B3S-45-1_S115	B10	B2	TAS	MT	45C	B	1	FLD0209	CTCTTAGTTC	B	2.5	25897	25766	23054	7000	6.28288	2.27485	44.2286	19.6411	B10_TAS_45C_MT_B_1_.fastq
B2S-45-2	SRS4213706	217244147					B2	B10	TAS	45C	MT	B	2	B10_TAS_45C_MT_B_2_.fastq	B2S-45-2	SRS4213706	217244147	217247058_Ankur098-B3S-45-2_S116	B10	B2	TAS	MT	45C	B	2	FLD0210	GGATAGGATC	B	2.5	25898	25746	22957	7000	6.68168	2.27094	45.4	20.7063	B10_TAS_45C_MT_B_2_.fastq
B2S-45-3	SRS4213707	217236229					B2	B10	TAS	45C	MT	B	3	B10_TAS_45C_MT_B_3_.fastq	B2S-45-3	SRS4213707	217236229	217243159_Ankur099-B3S-45-3_S117	B10	B2	TAS	MT	45C	B	3	FLD0211	GGTGTCTTGT	B	2.5	26495	26361	23510	7000	6.40617	2.28832	46.8857	19.7527	B10_TAS_45C_MT_B_3_.fastq
B2S-45-4	SRS4213705	217241185					B2	B10	TAS	45C	MT	B	4	B10_TAS_45C_MT_B_4_.fastq	B2S-45-4	SRS4213705	217241185	217241188_Ankur100-B3S-45-4_S118	B10	B2	TAS	MT	45C	B	4	FLD0212	GATGGTTGTA	B	2.5	24558	24466	21916	7000	6.39188	2.30236	44.0571	19.0236	B10_TAS_45C_MT_B_4_.fastq
B2S-45-5	SRS4213704	217229280					B2	B10	TAS	45C	MT	B	5	B10_TAS_45C_MT_B_5_.fastq	B2S-45-5	SRS4213704	217229280	217249044_Ankur101-B3S-45-5_S119	B10	B2	TAS	MT	45C	B	5	FLD0213	CCTCGTTGTT	B	2.5	25462	25333	22774	7000	6.27763	2.28064	44.2286	20.8302	B10_TAS_45C_MT_B_5_.fastq
B2S-45-6	SRS4213703	217244148					B2	B10	TAS	45C	MT	B	6	B10_TAS_45C_MT_B_6_.fastq	B2S-45-6	SRS4213703	217244148	217249045_Ankur102-B3S-45-6_S120	B10	B2	TAS	MT	45C	B	6	FLD0214	GGTTGGAGTT	B	2.5	30916	30748	27392	7000	6.07341	2.274	45.2286	20.3455	B10_TAS_45C_MT_B_6_.fastq
B2S-45-7	SRS4213702	217231282					B2	B10	TAS	45C	MT	B	7	B10_TAS_45C_MT_B_7_.fastq	B2S-45-7	SRS4213702	217231282	217241189_Ankur103-B3S-45-7_S121	B10	B2	TAS	MT	45C	B	7	FLD0215	TGGTGTCCGT	B	2.5	23603	23507	20818	7000	6.07009	2.27121	46.8571	19.6603	B10_TAS_45C_MT_B_7_.fastq
B2S-45-8	SRS4213701	217235219					B2	B10	TAS	45C	MT	B	8	B10_TAS_45C_MT_B_8_.fastq	B2S-45-8	SRS4213701	217235219	217232254_Ankur104-B3S-45-8_S122	B10	B2	TAS	MT	45C	B	8	FLD0216	CGTTAGCGTA	B	2.5	25558	25444	22713	7000	6.05388	2.27487	45.0286	19.89	B10_TAS_45C_MT_B_8_.fastq
B2S-55-1	SRS4213280	217232272					B2	B10	TAS	55C	MT	B	1	B10_TAS_55C_MT_B_1_.fastq	B2S-55-1	SRS4213280	217232272	217236243_Ankur185-B3S-55-1_S203	B10	B2	TAS	MT	55C	B	1	FLD0305	GGCATCATGC	B	2.5	22733	22623	19783	7000	4.90945	2.27117	31.8857	16.946	B10_TAS_55C_MT_B_1_.fastq
B2S-55-2	SRS4213281	217231297					B2	B10	TAS	55C	MT	B	2	B10_TAS_55C_MT_B_2_.fastq	B2S-55-2	SRS4213281	217231297	217240211_Ankur186-B3S-55-2_S204	B10	B2	TAS	MT	55C	B	2	FLD0306	GTATAACGCT	B	2.5	25509	25401	22881	7000	5.18129	2.28995	31.5143	17.1555	B10_TAS_55C_MT_B_2_.fastq
B2S-55-3	SRS4213278	217243179					B2	B10	TAS	55C	MT	B	3	B10_TAS_55C_MT_B_3_.fastq	B2S-55-3	SRS4213278	217243179	217245174_Ankur187-B3S-55-3_S205	B10	B2	TAS	MT	55C	B	3	FLD0307	GCAGATAAGT	B	2.5	27262	27129	24222	7000	5.13745	2.28958	30.4857	16.9371	B10_TAS_55C_MT_B_3_.fastq
B2S-55-4	SRS4213279	217245172					B2	B10	TAS	55C	MT	B	4	B10_TAS_55C_MT_B_4_.fastq	B2S-55-4	SRS4213279	217245172	217236246_Ankur188-B3S-55-4_S206	B10	B2	TAS	MT	55C	B	4	FLD0308	GTCGGCTCTA	B	2.5	23791	23520	20975	7000	5.05735	2.2714	32.0286	17.4201	B10_TAS_55C_MT_B_4_.fastq
B2S-55-5	SRS4213276	217246098					B2	B10	TAS	55C	MT	B	5	B10_TAS_55C_MT_B_5_.fastq	B2S-55-5	SRS4213276	217246098	217244176_Ankur189-B3S-55-5_S207	B10	B2	TAS	MT	55C	B	5	FLD0309	TTCGATAGCA	B	2.5	21434	21328	18975	7000	5.01223	2.27813	32.8	16.9378	B10_TAS_55C_MT_B_5_.fastq
B2S-55-6	SRS4213277	217251042					B2	B10	TAS	55C	MT	B	6	B10_TAS_55C_MT_B_6_.fastq	B2S-55-6	SRS4213277	217251042	217238216_Ankur190-B3S-55-6_S208	B10	B2	TAS	MT	55C	B	6	FLD0310	GTCTAGCAGG	B	2.5	24593	24465	21648	7000	4.96895	2.28796	30.9714	17.6556	B10_TAS_55C_MT_B_6_.fastq
B2S-55-7	SRS4213274	217247085					B2	B10	TAS	55C	MT	B	7	B10_TAS_55C_MT_B_7_.fastq	B2S-55-7	SRS4213274	217247085	217241210_Ankur191-B3S-55-7_S209	B10	B2	TAS	MT	55C	B	7	FLD0311	GGAACACAGG	B	2.5	21223	21120	18778	7000	4.98356	2.28219	32.2	17.6926	B10_TAS_55C_MT_B_7_.fastq
B2S-55-8	SRS4213275	217247086					B2	B10	TAS	55C	MT	B	8	B10_TAS_55C_MT_B_8_.fastq	B2S-55-8	SRS4213275	217247086	217243182_Ankur192-B3S-55-8_S210	B10	B2	TAS	MT	55C	B	8	FLD0312	TGGTTCGCTG	B	2.5	29956	29832	26542	7000	4.95601	2.30533	30.2857	18.3572	B10_TAS_55C_MT_B_8_.fastq
B4-45-1	SRS4213730	214656460					B4	B27	DePCR	45C	MT	B	1	B27_DePCR_45C_MT_B_1_.fastq	B4-45-1	SRS4213730	214656460	214656460_Ankur065-B4-45-1_S65	B27	B4	DePCR	MT	45C	B	1	FLD0065	TACTGAGCTG	B	2.5	16472	16320	12861	7000	Inf	3.24808	11.5429	40.7382	B27_DePCR_45C_MT_B_1_.fastq
B4-45-2	SRS4213731	214657452					B4	B27	DePCR	45C	MT	B	2	B27_DePCR_45C_MT_B_2_.fastq	B4-45-2	SRS4213731	214657452	214657452_Ankur066-B4-45-2_S66	B27	B4	DePCR	MT	45C	B	2	FLD0066	TAGTAGCGCG	B	2.5	12691	12539	9489	7000	Inf	3.26365	11.8	41.4113	B27_DePCR_45C_MT_B_2_.fastq
B4-45-3	SRS4213349	214662458					B4	B27	DePCR	45C	MT	B	3	B27_DePCR_45C_MT_B_3_.fastq	B4-45-3	SRS4213349	214662458	214662458_Ankur067-B4-45-3_S67	B27	B4	DePCR	MT	45C	B	3	FLD0067	GACGTCTGCT	B	2.5	15066	14914	11837	7000	Inf	3.28476	11.3714	41.9243	B27_DePCR_45C_MT_B_3_.fastq
B4-45-4	SRS4213348	214662459					B4	B27	DePCR	45C	MT	B	4	B27_DePCR_45C_MT_B_4_.fastq	B4-45-4	SRS4213348	214662459	214662459_Ankur068-B4-45-4_S68	B27	B4	DePCR	MT	45C	B	4	FLD0068	GTACTCGCGA	B	2.5	30578	30236	23263	7000	Inf	3.27219	13.5143	41.0753	B27_DePCR_45C_MT_B_4_.fastq
B4-45-5	SRS4213347	214647450					B4	B27	DePCR	45C	MT	B	5	B27_DePCR_45C_MT_B_5_.fastq	B4-45-5	SRS4213347	214647450	214647450_Ankur069-B4-45-5_S69	B27	B4	DePCR	MT	45C	B	5	FLD0069	TCTGAGCGCA	B	2.5	19884	19682	15391	7000	Inf	3.26985	13.5714	40.6357	B27_DePCR_45C_MT_B_5_.fastq
B4-45-6	SRS4213346	214653453					B4	B27	DePCR	45C	MT	B	6	B27_DePCR_45C_MT_B_6_.fastq	B4-45-6	SRS4213346	214653453	214653453_Ankur070-B4-45-6_S70	B27	B4	DePCR	MT	45C	B	6	FLD0070	TAGACGTGCT	B	2.5	11388	11279	8488	7000	Inf	NA	NA	41.3779	B27_DePCR_45C_MT_B_6_.fastq
B4-45-7	SRS4213345	214657454					B4	B27	DePCR	45C	MT	B	7	B27_DePCR_45C_MT_B_7_.fastq	B4-45-7	SRS4213345	214657454	214657454_Ankur071-B4-45-7_S71	B27	B4	DePCR	MT	45C	B	7	FLD0071	GTGACTCGTC	B	2.5	33076	32763	26057	7000	Inf	3.25545	10.4857	40.41	B27_DePCR_45C_MT_B_7_.fastq
B4-45-8	SRS4213344	214661458					B4	B27	DePCR	45C	MT	B	8	B27_DePCR_45C_MT_B_8_.fastq	B4-45-8	SRS4213344	214661458	214661458_Ankur072-B4-45-8_S72	B27	B4	DePCR	MT	45C	B	8	FLD0072	TCGAGTAGCG	B	2.5	13283	13118	9690	7000	Inf	3.2691	10.4857	42.4095	B27_DePCR_45C_MT_B_8_.fastq
B4-55-1	SRS4213343	214663454					B4	B27	DePCR	55C	MT	B	1	B27_DePCR_55C_MT_B_1_.fastq	B4-55-1	SRS4213343	214663454	214663454_Ankur193-B4-55-1_S193	B27	B4	DePCR	MT	55C	B	1	FLD0257	GTTCTTCGTA	B	2.5	40422	40022	32058	7000	Inf	3.22905	10.0286	48.4986	B27_DePCR_55C_MT_B_1_.fastq
B4-55-2	SRS4213341	214660468					B4	B27	DePCR	55C	MT	B	2	B27_DePCR_55C_MT_B_2_.fastq	B4-55-2	SRS4213341	214660468	214660468_Ankur194-B4-55-2_S194	B27	B4	DePCR	MT	55C	B	2	FLD0258	TTACACGTTC	B	2.5	35125	34787	27604	7000	Inf	3.22112	10.6571	48.426	B27_DePCR_55C_MT_B_2_.fastq
B4-55-3	SRS4213342	214647466					B4	B27	DePCR	55C	MT	B	3	B27_DePCR_55C_MT_B_3_.fastq	B4-55-3	SRS4213342	214647466	214647466_Ankur195-B4-55-3_S195	B27	B4	DePCR	MT	55C	B	3	FLD0259	GTAGCCAGTA	B	2.5	32995	32631	25824	7000	Inf	3.23293	11.2571	46.9447	B27_DePCR_55C_MT_B_3_.fastq
B4-55-4	SRS4213340	214657469					B4	B27	DePCR	55C	MT	B	4	B27_DePCR_55C_MT_B_4_.fastq	B4-55-4	SRS4213340	214657469	214657469_Ankur196-B4-55-4_S196	B27	B4	DePCR	MT	55C	B	4	FLD0260	TGAGAAGGTA	B	2.5	48915	48489	38788	7000	Inf	3.22283	10.3143	48.4282	B27_DePCR_55C_MT_B_4_.fastq
B4-55-5	SRS4213504	214653467					B4	B27	DePCR	55C	MT	B	5	B27_DePCR_55C_MT_B_5_.fastq	B4-55-5	SRS4213504	214653467	214653467_Ankur197-B4-55-5_S197	B27	B4	DePCR	MT	55C	B	5	FLD0261	CCATATGATC	B	2.5	35094	34767	27347	7000	Inf	3.2212	12.4571	49.7202	B27_DePCR_55C_MT_B_5_.fastq
B4-55-6	SRS4213505	214661477					B4	B27	DePCR	55C	MT	B	6	B27_DePCR_55C_MT_B_6_.fastq	B4-55-6	SRS4213505	214661477	214661477_Ankur198-B4-55-6_S198	B27	B4	DePCR	MT	55C	B	6	FLD0262	CGATCCTATA	B	2.5	31844	31528	25041	7000	Inf	3.21311	12.4286	48.4618	B27_DePCR_55C_MT_B_6_.fastq
B4-55-7	SRS4213502	214644461					B4	B27	DePCR	55C	MT	B	7	B27_DePCR_55C_MT_B_7_.fastq	B4-55-7	SRS4213502	214644461	214644461_Ankur199-B4-55-7_S199	B27	B4	DePCR	MT	55C	B	7	FLD0263	TGACTAGCTT	B	2.5	39182	38881	31008	7000	Inf	3.20308	13.0857	47.4407	B27_DePCR_55C_MT_B_7_.fastq
B4-55-8	SRS4213503	214661478					B4	B27	DePCR	55C	MT	B	8	B27_DePCR_55C_MT_B_8_.fastq	B4-55-8	SRS4213503	214661478	214661478_Ankur200-B4-55-8_S200	B27	B4	DePCR	MT	55C	B	8	FLD0264	TAACTCTGCT	B	2.5	29606	29358	23423	7000	Inf	3.21776	10	49.0259	B27_DePCR_55C_MT_B_8_.fastq
B4S-45-1	SRS4213512	217242157					B4	B27	TAS	45C	MT	B	1	B27_TAS_45C_MT_B_1_.fastq	B4S-45-1	SRS4213512	217242157	217242157_Ankur105-B4S-45-1_S123	B27	B4	TAS	MT	45C	B	1	FLD0217	TACTAGGATC	B	2.5	26589	26460	23466	7000	Inf	3.35862	42.7143	22.347	B27_TAS_45C_MT_B_1_.fastq
B4S-45-2	SRS4213513	217239224					B4	B27	TAS	45C	MT	B	2	B27_TAS_45C_MT_B_2_.fastq	B4S-45-2	SRS4213513	217239224	217239224_Ankur106-B4S-45-2_S124	B27	B4	TAS	MT	45C	B	2	FLD0218	GTCTCAATGT	B	2.5	24979	24870	22194	7000	Inf	3.35226	43.9143	23.2924	B27_TAS_45C_MT_B_2_.fastq
B4S-45-3	SRS4213514	217245150					B4	B27	TAS	45C	MT	B	3	B27_TAS_45C_MT_B_3_.fastq	B4S-45-3	SRS4213514	217245150	217245150_Ankur107-B4S-45-3_S125	B27	B4	TAS	MT	45C	B	3	FLD0219	GATGAGGTAT	B	2.5	25966	25831	22933	7000	Inf	3.34154	44.6857	22.1521	B27_TAS_45C_MT_B_3_.fastq
B4S-45-4	SRS4213516	217237244					B4	B27	TAS	45C	MT	B	4	B27_TAS_45C_MT_B_4_.fastq	B4S-45-4	SRS4213516	217237244	217237244_Ankur108-B4S-45-4_S126	B27	B4	TAS	MT	45C	B	4	FLD0220	GGTGTTAGTG	B	2.5	25978	25853	22975	7000	Inf	3.33456	40.3714	23.8712	B27_TAS_45C_MT_B_4_.fastq
B4S-45-5	SRS4213510	217232256					B4	B27	TAS	45C	MT	B	5	B27_TAS_45C_MT_B_5_.fastq	B4S-45-5	SRS4213510	217232256	217232256_Ankur109-B4S-45-5_S127	B27	B4	TAS	MT	45C	B	5	FLD0221	CATTCTCTGA	B	2.5	26578	26437	23353	7000	Inf	3.34019	40.2571	22.3738	B27_TAS_45C_MT_B_5_.fastq
B4S-45-6	SRS4213511	217249051					B4	B27	TAS	45C	MT	B	6	B27_TAS_45C_MT_B_6_.fastq	B4S-45-6	SRS4213511	217249051	217249051_Ankur110-B4S-45-6_S128	B27	B4	TAS	MT	45C	B	6	FLD0222	CATCTGGAGT	B	2.5	29045	28914	25764	7000	Inf	3.35501	40.9429	23.441	B27_TAS_45C_MT_B_6_.fastq
B4S-45-7	SRS4213650	217238194					B4	B27	TAS	45C	MT	B	7	B27_TAS_45C_MT_B_7_.fastq	B4S-45-7	SRS4213650	217238194	217238194_Ankur111-B4S-45-7_S129	B27	B4	TAS	MT	45C	B	7	FLD0223	GAATGGAAGA	B	2.5	29743	29637	26236	7000	Inf	3.34237	42.6	23.2008	B27_TAS_45C_MT_B_7_.fastq
B4S-45-8	SRS4213649	217232257					B4	B27	TAS	45C	MT	B	8	B27_TAS_45C_MT_B_8_.fastq	B4S-45-8	SRS4213649	217232257	217232257_Ankur112-B4S-45-8_S130	B27	B4	TAS	MT	45C	B	8	FLD0224	GGCTGTGATC	B	2.5	30838	30716	27175	7000	Inf	3.34351	41.6	23.2762	B27_TAS_45C_MT_B_8_.fastq
B4S-55-1	SRS4213648	217237273					B4	B27	TAS	55C	MT	B	1	B27_TAS_55C_MT_B_1_.fastq	B4S-55-1	SRS4213648	217237273	217237273_Ankur193-B4S-55-1_S211	B27	B4	TAS	MT	55C	B	1	FLD0313	CACATTAGCG	B	2.5	23953	23852	21019	7000	Inf	3.3616	34.5714	20.1276	B27_TAS_55C_MT_B_1_.fastq
B4S-55-2	SRS4213647	217247088					B4	B27	TAS	55C	MT	B	2	B27_TAS_55C_MT_B_2_.fastq	B4S-55-2	SRS4213647	217247088	217247088_Ankur194-B4S-55-2_S212	B27	B4	TAS	MT	55C	B	2	FLD0314	GAAGCGCACT	B	2.5	30814	30705	27120	7000	Inf	3.34426	35.4	21.5828	B27_TAS_55C_MT_B_2_.fastq
B4S-55-3	SRS4213655	217232281					B4	B27	TAS	55C	MT	B	3	B27_TAS_55C_MT_B_3_.fastq	B4S-55-3	SRS4213655	217232281	217232281_Ankur195-B4S-55-3_S213	B27	B4	TAS	MT	55C	B	3	FLD0315	GCATGCCAGT	B	2.5	25699	25568	22541	7000	Inf	3.35476	31.4857	20.2897	B27_TAS_55C_MT_B_3_.fastq
B4S-55-4	SRS4213653	217243184					B4	B27	TAS	55C	MT	B	4	B27_TAS_55C_MT_B_4_.fastq	B4S-55-4	SRS4213653	217243184	217243184_Ankur196-B4S-55-4_S214	B27	B4	TAS	MT	55C	B	4	FLD0316	GGAGACTGTA	B	2.5	25432	25318	22530	7000	Inf	3.35105	35.0571	21.9913	B27_TAS_55C_MT_B_4_.fastq
B4S-55-5	SRS4213652	217231305					B4	B27	TAS	55C	MT	B	5	B27_TAS_55C_MT_B_5_.fastq	B4S-55-5	SRS4213652	217231305	217231305_Ankur197-B4S-55-5_S215	B27	B4	TAS	MT	55C	B	5	FLD0317	TCGAACTGCA	B	2.5	23279	23155	20574	7000	Inf	3.3659	35.1429	21.6471	B27_TAS_55C_MT_B_5_.fastq
B4S-55-6	SRS4213651	217237274					B4	B27	TAS	55C	MT	B	6	B27_TAS_55C_MT_B_6_.fastq	B4S-55-6	SRS4213651	217237274	217237274_Ankur198-B4S-55-6_S216	B27	B4	TAS	MT	55C	B	6	FLD0318	GAGAGGACAT	B	2.5	26815	26708	23652	7000	Inf	3.3567	34.0857	21.0915	B27_TAS_55C_MT_B_6_.fastq
B4S-55-7	SRS4213645	217231306					B4	B27	TAS	55C	MT	B	7	B27_TAS_55C_MT_B_7_.fastq	B4S-55-7	SRS4213645	217231306	217231306_Ankur199-B4S-55-7_S217	B27	B4	TAS	MT	55C	B	7	FLD0319	GAGCACGGAA	B	2.5	24421	24324	21438	7000	Inf	3.34074	32.4286	21.5718	B27_TAS_55C_MT_B_7_.fastq
B4S-55-8	SRS4213644	217249076					B4	B27	TAS	55C	MT	B	8	B27_TAS_55C_MT_B_8_.fastq	B4S-55-8	SRS4213644	217249076	217249076_Ankur200-B4S-55-8_S218	B27	B4	TAS	MT	55C	B	8	FLD0320	GCTCTAACAT	B	2.5	25918	25798	22963	7000	Inf	3.37775	34.8571	20.5905	B27_TAS_55C_MT_B_8_.fastq
C1-45-1	SRS4213508	214657455					C1	C01	DePCR	45C	MT	C	1	C01_DePCR_45C_MT_C_1_.fastq	C1-45-1	SRS4213508	214657455	214657455_Ankur073-C1-45-1_S73	C01	C1	DePCR	MT	45C	C	1	FLD0073	CGTATGATGT	C	2.5	28081	27737	22751	7000	62.4223	0.269077	21.2198	0	C01_DePCR_45C_MT_C_1_.fastq
C1-45-2	SRS4213509	214639449					C1	C01	DePCR	45C	MT	C	2	C01_DePCR_45C_MT_C_2_.fastq	C1-45-2	SRS4213509	214639449	214639449_Ankur074-C1-45-2_S74	C01	C1	DePCR	MT	45C	C	2	FLD0074	TAGTCTGTCA	C	2.5	26265	26003	21370	7000	63.2804	0.268682	19.9341	0	C01_DePCR_45C_MT_C_2_.fastq
C1-45-3	SRS4213506	214645446					C1	C01	DePCR	45C	MT	C	3	C01_DePCR_45C_MT_C_3_.fastq	C1-45-3	SRS4213506	214645446	214645446_Ankur075-C1-45-3_S75	C01	C1	DePCR	MT	45C	C	3	FLD0075	TGTCTCTATC	C	2.5	28826	28509	23360	7000	74.7213	0.261527	20.5626	0	C01_DePCR_45C_MT_C_3_.fastq
C1-45-4	SRS4213507	214652456					C1	C01	DePCR	45C	MT	C	4	C01_DePCR_45C_MT_C_4_.fastq	C1-45-4	SRS4213507	214652456	214652456_Ankur076-C1-45-4_S76	C01	C1	DePCR	MT	45C	C	4	FLD0076	CTAGAGTATC	C	2.5	25671	25376	20681	7000	63.4326	0.290793	21.4549	0	C01_DePCR_45C_MT_C_4_.fastq
C1-45-5	SRS4213498	214657456					C1	C01	DePCR	45C	MT	C	5	C01_DePCR_45C_MT_C_5_.fastq	C1-45-5	SRS4213498	214657456	214657456_Ankur077-C1-45-5_S77	C01	C1	DePCR	MT	45C	C	5	FLD0077	TATCATGTGC	C	2.5	24377	24108	19249	7000	62.1205	0.303236	18.9626	0	C01_DePCR_45C_MT_C_5_.fastq
C1-45-6	SRS4213499	214660458					C1	C01	DePCR	45C	MT	C	6	C01_DePCR_45C_MT_C_6_.fastq	C1-45-6	SRS4213499	214660458	214660458_Ankur078-C1-45-6_S78	C01	C1	DePCR	MT	45C	C	6	FLD0078	CATGAGTGTA	C	2.5	27715	27424	22466	7000	69.2747	0.286091	22.0835	0	C01_DePCR_45C_MT_C_6_.fastq
C1-45-7	SRS4213491	214640445					C1	C01	DePCR	45C	MT	C	7	C01_DePCR_45C_MT_C_7_.fastq	C1-45-7	SRS4213491	214640445	214640445_Ankur079-C1-45-7_S79	C01	C1	DePCR	MT	45C	C	7	FLD0079	TGTCGTCATA	C	2.5	33451	33127	27241	7000	64.2336	0.298745	23.9626	0	C01_DePCR_45C_MT_C_7_.fastq
C1-45-8	SRS4213490	214660459					C1	C01	DePCR	45C	MT	C	8	C01_DePCR_45C_MT_C_8_.fastq	C1-45-8	SRS4213490	214660459	214660459_Ankur080-C1-45-8_S80	C01	C1	DePCR	MT	45C	C	8	FLD0080	TATCTCATGC	C	2.5	23577	23340	18744	7000	73.6377	0.266705	20.1121	0	C01_DePCR_45C_MT_C_8_.fastq
C1-55-1	SRS4213493	214662471					C1	C01	DePCR	55C	MT	C	1	C01_DePCR_55C_MT_C_1_.fastq	C1-55-1	SRS4213493	214662471	214662471_Ankur201-C1-55-1_S201	C01	C1	DePCR	MT	55C	C	1	FLD0265	TCGAATGTGC	C	2.5	27282	26968	21628	7000	63	0.342077	23.0703	0	C01_DePCR_55C_MT_C_1_.fastq
C1-55-2	SRS4213492	214661479					C1	C01	DePCR	55C	MT	C	2	C01_DePCR_55C_MT_C_2_.fastq	C1-55-2	SRS4213492	214661479	214661479_Ankur202-C1-55-2_S202	C01	C1	DePCR	MT	55C	C	2	FLD0266	TCGCTGAACA	C	2.5	30460	30144	24754	7000	64.9486	0.369004	23.2989	0	C01_DePCR_55C_MT_C_2_.fastq
C1-55-3	SRS4213640	214654457					C1	C01	DePCR	55C	MT	C	3	C01_DePCR_55C_MT_C_3_.fastq	C1-55-3	SRS4213640	214654457	214654457_Ankur203-C1-55-3_S203	C01	C1	DePCR	MT	55C	C	3	FLD0267	GCGTTATTGC	C	2.5	45026	44509	36085	7000	60.2806	0.351819	23.2989	0	C01_DePCR_55C_MT_C_3_.fastq
C1-55-4	SRS4213639	214659466					C1	C01	DePCR	55C	MT	C	4	C01_DePCR_55C_MT_C_4_.fastq	C1-55-4	SRS4213639	214659466	214659466_Ankur204-C1-55-4_S204	C01	C1	DePCR	MT	55C	C	4	FLD0268	GAACTATCAC	C	2.5	45291	44836	37046	7000	56.484	0.329984	23.6418	0	C01_DePCR_55C_MT_C_4_.fastq
C1-55-5	SRS4213497	214652469					C1	C01	DePCR	55C	MT	C	5	C01_DePCR_55C_MT_C_5_.fastq	C1-55-5	SRS4213497	214652469	214652469_Ankur205-C1-55-5_S205	C01	C1	DePCR	MT	55C	C	5	FLD0269	TCGAGGTACT	C	2.5	39693	39258	32100	7000	59.2159	0.348733	23.6703	0	C01_DePCR_55C_MT_C_5_.fastq
C1-55-6	SRS4213496	214662472					C1	C01	DePCR	55C	MT	C	6	C01_DePCR_55C_MT_C_6_.fastq	C1-55-6	SRS4213496	214662472	214662472_Ankur206-C1-55-6_S206	C01	C1	DePCR	MT	55C	C	6	FLD0270	TGCGGATGGT	C	2.5	41053	40578	32814	7000	67.3464	0.408244	24.156	0	C01_DePCR_55C_MT_C_6_.fastq
C1-55-7	SRS4213632	214662473					C1	C01	DePCR	55C	MT	C	7	C01_DePCR_55C_MT_C_7_.fastq	C1-55-7	SRS4213632	214662473	214662473_Ankur207-C1-55-7_S207	C01	C1	DePCR	MT	55C	C	7	FLD0271	TTCGAGCTAT	C	2.5	26856	26578	21764	7000	59.3234	0.391035	24.356	0	C01_DePCR_55C_MT_C_7_.fastq
C1-55-8	SRS4213631	214665453					C1	C01	DePCR	55C	MT	C	8	C01_DePCR_55C_MT_C_8_.fastq	C1-55-8	SRS4213631	214665453	214665453_Ankur208-C1-55-8_S208	C01	C1	DePCR	MT	55C	C	8	FLD0272	GGTCTGGTGT	C	2.5	38729	38268	31382	7000	52.2865	0.372006	25.4418	0	C01_DePCR_55C_MT_C_8_.fastq
C1S-45-1	SRS4213637	217228312					C1	C01	TAS	45C	MT	C	1	C01_TAS_45C_MT_C_1_.fastq	C1S-45-1	SRS4213637	217228312	217228312_Ankur113-C1S-45-1_S131	C01	C1	TAS	MT	45C	C	1	FLD0225	TGGTGCTGGA	C	2.5	30543	30393	27045	7000	81.8731	0.0604872	47.5407	0	C01_TAS_45C_MT_C_1_.fastq
C1S-45-2	SRS4213638	217232259					C1	C01	TAS	45C	MT	C	2	C01_TAS_45C_MT_C_2_.fastq	C1S-45-2	SRS4213638	217232259	217232259_Ankur114-C1S-45-2_S132	C01	C1	TAS	MT	45C	C	2	FLD0226	TATGGTAAGG	C	2.5	30375	30255	27178	7000	78.8291	0.063238	48.9407	0	C01_TAS_45C_MT_C_2_.fastq
C1S-45-3	SRS4213635	217229289					C1	C01	TAS	45C	MT	C	3	C01_TAS_45C_MT_C_3_.fastq	C1S-45-3	SRS4213635	217229289	217229289_Ankur115-C1S-45-3_S133	C01	C1	TAS	MT	45C	C	3	FLD0227	GTTCGATTGT	C	2.5	29675	29536	26741	7000	73.3151	0.0571347	49.5407	0	C01_TAS_45C_MT_C_3_.fastq
C1S-45-4	SRS4213636	217247063					C1	C01	TAS	45C	MT	C	4	C01_TAS_45C_MT_C_4_.fastq	C1S-45-4	SRS4213636	217247063	217247063_Ankur116-C1S-45-4_S134	C01	C1	TAS	MT	45C	C	4	FLD0228	GGTAGAATGA	C	2.5	30298	30190	26996	7000	82.7909	0.0616612	47.5912	0	C01_TAS_45C_MT_C_4_.fastq
C1S-45-5	SRS4213642	217243166					C1	C01	TAS	45C	MT	C	5	C01_TAS_45C_MT_C_5_.fastq	C1S-45-5	SRS4213642	217243166	217243166_Ankur117-C1S-45-5_S135	C01	C1	TAS	MT	45C	C	5	FLD0229	TTCTCATCGT	C	2.5	28073	27970	25263	7000	84.2573	0.0569136	48.7692	0	C01_TAS_45C_MT_C_5_.fastq
C1S-45-6	SRS4213641	217237248					C1	C01	TAS	45C	MT	C	6	C01_TAS_45C_MT_C_6_.fastq	C1S-45-6	SRS4213641	217237248	217237248_Ankur118-C1S-45-6_S136	C01	C1	TAS	MT	45C	C	6	FLD0230	CTCAATCGTA	C	2.5	30807	30661	27683	7000	78.7113	0.0541875	49.4835	0	C01_TAS_45C_MT_C_6_.fastq
C1S-45-7	SRS4213494	217243168					C1	C01	TAS	45C	MT	C	7	C01_TAS_45C_MT_C_7_.fastq	C1S-45-7	SRS4213494	217243168	217243168_Ankur119-C1S-45-7_S137	C01	C1	TAS	MT	45C	C	7	FLD0231	CGCTAATGTA	C	2.5	26845	26725	23981	7000	78.4733	0.0714848	48.9121	0	C01_TAS_45C_MT_C_7_.fastq
C1S-45-8	SRS4213495	217247065					C1	C01	TAS	45C	MT	C	8	C01_TAS_45C_MT_C_8_.fastq	C1S-45-8	SRS4213495	217247065	217247065_Ankur120-C1S-45-8_S138	C01	C1	TAS	MT	45C	C	8	FLD0232	GCGTCTGAAT	C	2.5	30448	30324	27446	7000	84	0.0590863	49.0198	0	C01_TAS_45C_MT_C_8_.fastq
C1S-55-1	SRS4213634	217232283					C1	C01	TAS	55C	MT	C	1	C01_TAS_55C_MT_C_1_.fastq	C1S-55-1	SRS4213634	217232283	217232283_Ankur201-C1S-55-1_S219	C01	C1	TAS	MT	55C	C	1	FLD0321	TGCTGGCTTG	C	2.5	26555	26444	23803	7000	65.0414	0.0652311	60.1121	0	C01_TAS_55C_MT_C_1_.fastq
C1S-55-2	SRS4213633	217251051					C1	C01	TAS	55C	MT	C	2	C01_TAS_55C_MT_C_2_.fastq	C1S-55-2	SRS4213633	217251051	217251051_Ankur202-C1S-55-2_S220	C01	C1	TAS	MT	55C	C	2	FLD0322	TGCATGGAGC	C	2.5	22741	22626	20063	7000	72.2127	0.0687527	61.1187	0	C01_TAS_55C_MT_C_2_.fastq
C1S-55-3	SRS4213656	217240213					C1	C01	TAS	55C	MT	C	3	C01_TAS_55C_MT_C_3_.fastq	C1S-55-3	SRS4213656	217240213	217240213_Ankur203-C1S-55-3_S221	C01	C1	TAS	MT	55C	C	3	FLD0323	GTACTAAGAG	C	2.5	30520	30395	27449	7000	65.4435	0.0637169	58.4264	0	C01_TAS_55C_MT_C_3_.fastq
C1S-55-4	SRS4213657	217244179					C1	C01	TAS	55C	MT	C	4	C01_TAS_55C_MT_C_4_.fastq	C1S-55-4	SRS4213657	217244179	217244179_Ankur204-C1S-55-4_S222	C01	C1	TAS	MT	55C	C	4	FLD0324	GAAGTCAAGC	C	2.5	23311	23212	20698	7000	67.0984	0.0593334	59.0264	0	C01_TAS_55C_MT_C_4_.fastq
C1S-55-5	SRS4213658	217239248					C1	C01	TAS	55C	MT	C	5	C01_TAS_55C_MT_C_5_.fastq	C1S-55-5	SRS4213658	217239248	217239248_Ankur205-C1S-55-5_S223	C01	C1	TAS	MT	55C	C	5	FLD0325	GCGCATTATG	C	2.5	26913	26785	24182	7000	67.8546	0.0699234	60.3758	0	C01_TAS_55C_MT_C_5_.fastq
C1S-55-6	SRS4213659	217238219					C1	C01	TAS	55C	MT	C	6	C01_TAS_55C_MT_C_6_.fastq	C1S-55-6	SRS4213659	217238219	217238219_Ankur206-C1S-55-6_S224	C01	C1	TAS	MT	55C	C	6	FLD0326	GTCCAGACAT	C	2.5	33716	33576	30395	7000	67.3671	0.0502432	60.1407	0	C01_TAS_55C_MT_C_6_.fastq
C1S-55-7	SRS4213643	217250048					C1	C01	TAS	55C	MT	C	7	C01_TAS_55C_MT_C_7_.fastq	C1S-55-7	SRS4213643	217250048	217250048_Ankur207-C1S-55-7_S225	C01	C1	TAS	MT	55C	C	7	FLD0327	GAGACCTCTA	C	2.5	29354	29261	26378	7000	63.1331	0.0560714	60.1978	0	C01_TAS_55C_MT_C_7_.fastq
C1S-55-8	SRS4213646	217245179					C1	C01	TAS	55C	MT	C	8	C01_TAS_55C_MT_C_8_.fastq	C1S-55-8	SRS4213646	217245179	217245179_Ankur208-C1S-55-8_S226	C01	C1	TAS	MT	55C	C	8	FLD0328	TTGCACTCAG	C	2.5	26981	26897	24319	7000	64.5298	0.062706	59.8549	0	C01_TAS_55C_MT_C_8_.fastq
C3-45-1	SRS4213393	214640447					C3	C09	DePCR	45C	MT	C	1	C09_DePCR_45C_MT_C_1_.fastq	C3-45-1	SRS4213393	214640447	214654449_Ankur081-C2-45-1_S81	C09	C3	DePCR	MT	45C	C	1	FLD0081	TGTGTCACTA	C	2.5	25995	25745	20883	7000	1.89543	2.35023	17.2264	37.0451	C09_DePCR_45C_MT_C_1_.fastq
C3-45-2	SRS4213392	214662461					C3	C09	DePCR	45C	MT	C	2	C09_DePCR_45C_MT_C_2_.fastq	C3-45-2	SRS4213392	214662461	214656463_Ankur082-C2-45-2_S82	C09	C3	DePCR	MT	45C	C	2	FLD0082	TATCGATGCT	C	2.5	24292	24027	19417	7000	1.84453	2.34	19.2549	35.2761	C09_DePCR_45C_MT_C_2_.fastq
C3-45-3	SRS4213397	214640448					C3	C09	DePCR	45C	MT	C	3	C09_DePCR_45C_MT_C_3_.fastq	C3-45-3	SRS4213397	214640448	214646456_Ankur083-C2-45-3_S83	C09	C3	DePCR	MT	45C	C	3	FLD0083	TAGAGTCTGT	C	2.5	28561	28274	23009	7000	1.99223	2.31529	19.3121	36.1478	C09_DePCR_45C_MT_C_3_.fastq
C3-45-4	SRS4213396	214644443					C3	C09	DePCR	45C	MT	C	4	C09_DePCR_45C_MT_C_4_.fastq	C3-45-4	SRS4213396	214644443	214654451_Ankur084-C2-45-4_S84	C09	C3	DePCR	MT	45C	C	4	FLD0084	CATGCATCAT	C	2.5	20567	20363	16443	7000	2.0208	2.29914	20.9407	39.051	C09_DePCR_45C_MT_C_4_.fastq
C3-45-5	SRS4213292	214639451					C3	C09	DePCR	45C	MT	C	5	C09_DePCR_45C_MT_C_5_.fastq	C3-45-5	SRS4213292	214639451	214650455_Ankur085-C2-45-5_S85	C09	C3	DePCR	MT	45C	C	5	FLD0085	TGATCAGTCA	C	2.5	28512	28236	22953	7000	1.56889	2.31766	17.7187	41.5609	C09_DePCR_45C_MT_C_5_.fastq
C3-45-6	SRS4213293	214639452					C3	C09	DePCR	45C	MT	C	6	C09_DePCR_45C_MT_C_6_.fastq	C3-45-6	SRS4213293	214639452	214650456_Ankur086-C2-45-6_S86	C09	C3	DePCR	MT	45C	C	6	FLD0086	CGTCTATGAT	C	2.5	18544	18334	14911	7000	1.89373	2.32009	17.9121	37.0649	C09_DePCR_45C_MT_C_6_.fastq
C3-45-7	SRS4213290	214651452					C3	C09	DePCR	45C	MT	C	7	C09_DePCR_45C_MT_C_7_.fastq	C3-45-7	SRS4213290	214651452	214662460_Ankur087-C2-45-7_S87	C09	C3	DePCR	MT	45C	C	7	FLD0087	GTGATACTGA	C	2.5	33422	33081	26819	7000	2.02992	2.33244	19.8484	37.2883	C09_DePCR_45C_MT_C_7_.fastq
C3-45-8	SRS4213291	214650458					C3	C09	DePCR	45C	MT	C	8	C09_DePCR_45C_MT_C_8_.fastq	C3-45-8	SRS4213291	214650458	214657457_Ankur088-C2-45-8_S88	C09	C3	DePCR	MT	45C	C	8	FLD0088	CTAGATCTGA	C	2.5	19064	18864	15301	7000	1.59168	2.33186	20.3692	38.0136	C09_DePCR_45C_MT_C_8_.fastq
C3-55-1	SRS4213288	214660471					C3	C09	DePCR	55C	MT	C	1	C09_DePCR_55C_MT_C_1_.fastq	C3-55-1	SRS4213288	214660471	214653468_Ankur209-C2-55-1_S209	C09	C3	DePCR	MT	55C	C	1	FLD0273	CTAAGTCATG	C	2.5	28027	27770	22489	7000	0.651585	2.30674	15.0044	42.0719	C09_DePCR_55C_MT_C_1_.fastq
C3-55-2	SRS4213289	214651463					C3	C09	DePCR	55C	MT	C	2	C09_DePCR_55C_MT_C_2_.fastq	C3-55-2	SRS4213289	214651463	214645462_Ankur210-C2-55-2_S210	C09	C3	DePCR	MT	55C	C	2	FLD0274	TTGCAGATCA	C	2.5	28084	27791	22653	7000	0.686179	2.31725	16.3187	41.6356	C09_DePCR_55C_MT_C_2_.fastq
C3-55-3	SRS4213286	214660472					C3	C09	DePCR	55C	MT	C	3	C09_DePCR_55C_MT_C_3_.fastq	C3-55-3	SRS4213286	214660472	214645463_Ankur211-C2-55-3_S211	C09	C3	DePCR	MT	55C	C	3	FLD0275	CTGCGAATGT	C	2.5	34290	33932	27410	7000	0.679	2.30781	15.3758	42.6819	C09_DePCR_55C_MT_C_3_.fastq
C3-55-4	SRS4213287	214663456					C3	C09	DePCR	55C	MT	C	4	C09_DePCR_55C_MT_C_4_.fastq	C3-55-4	SRS4213287	214663456	214657472_Ankur212-C2-55-4_S212	C09	C3	DePCR	MT	55C	C	4	FLD0276	CTGTTCTAGC	C	2.5	29222	28930	22999	7000	0.636324	2.30809	18.833	41.1922	C09_DePCR_55C_MT_C_4_.fastq
C3-55-5	SRS4213284	214657473					C3	C09	DePCR	55C	MT	C	5	C09_DePCR_55C_MT_C_5_.fastq	C3-55-5	SRS4213284	214657473	214646477_Ankur213-C2-55-5_S213	C09	C3	DePCR	MT	55C	C	5	FLD0277	CACTTGTGTG	C	2.5	29934	29634	23799	7000	0.612873	2.29425	15.6901	41.2599	C09_DePCR_55C_MT_C_5_.fastq
C3-55-6	SRS4213285	214665456					C3	C09	DePCR	55C	MT	C	6	C09_DePCR_55C_MT_C_6_.fastq	C3-55-6	SRS4213285	214665456	214652470_Ankur214-C2-55-6_S214	C09	C3	DePCR	MT	55C	C	6	FLD0278	TGGATGACAT	C	2.5	46853	46440	37793	7000	0.597197	2.28703	14.3473	42.3595	C09_DePCR_55C_MT_C_6_.fastq
C3-55-7	SRS4213415	214646479					C3	C09	DePCR	55C	MT	C	7	C09_DePCR_55C_MT_C_7_.fastq	C3-55-7	SRS4213415	214646479	214648463_Ankur215-C2-55-7_S215	C09	C3	DePCR	MT	55C	C	7	FLD0279	GATCCTGAGC	C	2.5	40867	40428	31909	7000	0.640577	2.30751	16.8901	42.0185	C09_DePCR_55C_MT_C_7_.fastq
C3-55-8	SRS4213414	214645465					C3	C09	DePCR	55C	MT	C	8	C09_DePCR_55C_MT_C_8_.fastq	C3-55-8	SRS4213414	214645465	214654458_Ankur216-C2-55-8_S216	C09	C3	DePCR	MT	55C	C	8	FLD0280	GTCGGTCTGA	C	2.5	36998	36635	29490	7000	0.630561	2.29663	15.8396	41.9929	C09_DePCR_55C_MT_C_8_.fastq
C3S-45-1	SRS4213462	217244156					C3	C09	TAS	45C	MT	C	1	C09_TAS_45C_MT_C_1_.fastq	C3S-45-1	SRS4213462	217244156	217249056_Ankur121-C2S-45-1_S139	C09	C3	TAS	MT	45C	C	1	FLD0233	TTCTGTTGCC	C	2.5	28720	28581	25591	7000	5.95946	2.34086	47.7978	21.6092	C09_TAS_45C_MT_C_1_.fastq
C3S-45-2	SRS4213463	217242165					C3	C09	TAS	45C	MT	C	2	C09_TAS_45C_MT_C_2_.fastq	C3S-45-2	SRS4213463	217242165	217240196_Ankur122-C2S-45-2_S140	C09	C3	TAS	MT	45C	C	2	FLD0234	TTGTCCTTGC	C	2.5	31796	31664	28129	7000	5.6509	2.33803	48.8264	19.495	C09_TAS_45C_MT_C_2_.fastq
C3S-45-3	SRS4213468	217239229					C3	C09	TAS	45C	MT	C	3	C09_TAS_45C_MT_C_3_.fastq	C3S-45-3	SRS4213468	217239229	217239226_Ankur123-C2S-45-3_S141	C09	C3	TAS	MT	45C	C	3	FLD0235	CCTGTGTAGA	C	2.5	31608	31449	27916	7000	5.69155	2.33548	49.1692	20.1097	C09_TAS_45C_MT_C_3_.fastq
C3S-45-4	SRS4213469	217250034					C3	C09	TAS	45C	MT	C	4	C09_TAS_45C_MT_C_4_.fastq	C3S-45-4	SRS4213469	217250034	217241194_Ankur124-C2S-45-4_S142	C09	C3	TAS	MT	45C	C	4	FLD0236	GATAAGAAGG	C	2.5	28726	28590	25569	7000	5.74518	2.33202	49.7187	20.2224	C09_TAS_45C_MT_C_4_.fastq
C3S-45-5	SRS4213466	217242167					C3	C09	TAS	45C	MT	C	5	C09_TAS_45C_MT_C_5_.fastq	C3S-45-5	SRS4213466	217242167	217238197_Ankur125-C2S-45-5_S143	C09	C3	TAS	MT	45C	C	5	FLD0237	CAGGTCACAT	C	2.5	27069	26947	24025	7000	5.83177	2.33042	49.1978	20.8641	C09_TAS_45C_MT_C_5_.fastq
C3S-45-6	SRS4213467	217236235					C3	C09	TAS	45C	MT	C	6	C09_TAS_45C_MT_C_6_.fastq	C3S-45-6	SRS4213467	217236235	217232261_Ankur126-C2S-45-6_S144	C09	C3	TAS	MT	45C	C	6	FLD0238	GCCATGTCAT	C	2.5	28695	28557	25552	7000	5.74933	2.34452	48.6835	19.755	C09_TAS_45C_MT_C_6_.fastq
C3S-45-7	SRS4213732	217240198					C3	C09	TAS	45C	MT	C	7	C09_TAS_45C_MT_C_7_.fastq	C3S-45-7	SRS4213732	217240198	217242164_Ankur127-C2S-45-7_S145	C09	C3	TAS	MT	45C	C	7	FLD0239	TCTGCCTATA	C	2.5	25509	25415	22744	7000	5.71894	2.34121	50.0835	19.6521	C09_TAS_45C_MT_C_7_.fastq
C3S-45-8	SRS4213733	217250036					C3	C09	TAS	45C	MT	C	8	C09_TAS_45C_MT_C_8_.fastq	C3S-45-8	SRS4213733	217250036	217238198_Ankur128-C2S-45-8_S146	C09	C3	TAS	MT	45C	C	8	FLD0240	CTTAGTTCGC	C	2.5	27923	27778	24622	7000	5.63692	2.32097	49.9099	20.9074	C09_TAS_45C_MT_C_8_.fastq
C3S-55-1	SRS4213630	217237284					C3	C09	TAS	55C	MT	C	1	C09_TAS_55C_MT_C_1_.fastq	C3S-55-1	SRS4213630	217237284	217235256_Ankur209-C2S-55-1_S227	C09	C3	TAS	MT	55C	C	1	FLD0329	TGCGGCGATA	C	2.5	24127	24039	21125	7000	4.42731	2.3442	34.8835	18.4773	C09_TAS_55C_MT_C_1_.fastq
C3S-55-2	SRS4213629	217235259					C3	C09	TAS	55C	MT	C	2	C09_TAS_55C_MT_C_2_.fastq	C3S-55-2	SRS4213629	217235259	217235257_Ankur210-C2S-55-2_S228	C09	C3	TAS	MT	55C	C	2	FLD0330	AGTTGCTAGT	C	2.5	26456	26332	23513	7000	4.50092	2.3494	32.2835	20.3485	C09_TAS_55C_MT_C_2_.fastq
C3S-55-3	SRS4213628	217239255					C3	C09	TAS	55C	MT	C	3	C09_TAS_55C_MT_C_3_.fastq	C3S-55-3	SRS4213628	217239255	217243188_Ankur211-C2S-55-3_S229	C09	C3	TAS	MT	55C	C	3	FLD0331	AGGATTGAGG	C	2.5	30845	30687	27493	7000	4.57975	2.35229	33.7758	20.2555	C09_TAS_55C_MT_C_3_.fastq
C3S-55-4	SRS4213627	217245182					C3	C09	TAS	55C	MT	C	4	C09_TAS_55C_MT_C_4_.fastq	C3S-55-4	SRS4213627	217245182	217239251_Ankur212-C2S-55-4_S230	C09	C3	TAS	MT	55C	C	4	FLD0332	CCAGAACAGA	C	2.5	24465	24312	21548	7000	4.5812	2.3443	35.2044	19.4216	C09_TAS_55C_MT_C_4_.fastq
C3S-55-5	SRS4213626	217236251					C3	C09	TAS	55C	MT	C	5	C09_TAS_55C_MT_C_5_.fastq	C3S-55-5	SRS4213626	217236251	217243189_Ankur213-C2S-55-5_S231	C09	C3	TAS	MT	55C	C	5	FLD0333	CGTCAAGCAT	C	2.5	25619	25485	22649	7000	4.60308	2.33607	33.9692	19.1182	C09_TAS_55C_MT_C_5_.fastq
C3S-55-6	SRS4213387	217237288					C3	C09	TAS	55C	MT	C	6	C09_TAS_55C_MT_C_6_.fastq	C3S-55-6	SRS4213387	217237288	217244185_Ankur214-C2S-55-6_S232	C09	C3	TAS	MT	55C	C	6	FLD0334	TTGTCGAGAC	C	2.5	27223	27129	24353	7000	4.35206	2.33771	32.7121	20.5231	C09_TAS_55C_MT_C_6_.fastq
C3S-55-7	SRS4213385	217231312					C3	C09	TAS	55C	MT	C	7	C09_TAS_55C_MT_C_7_.fastq	C3S-55-7	SRS4213385	217231312	217239252_Ankur215-C2S-55-7_S233	C09	C3	TAS	MT	55C	C	7	FLD0335	GACAGGTGAC	C	2.5	25662	25560	22837	7000	4.42683	2.34144	33.4835	20.3296	C09_TAS_55C_MT_C_7_.fastq
C3S-55-8	SRS4213382	217231313					C3	C09	TAS	55C	MT	C	8	C09_TAS_55C_MT_C_8_.fastq	C3S-55-8	SRS4213382	217231313	217232285_Ankur216-C2S-55-8_S234	C09	C3	TAS	MT	55C	C	8	FLD0336	CTGACAAGTG	C	2.5	26914	26754	24055	7000	4.35627	2.33715	34.033	19.7098	C09_TAS_55C_MT_C_8_.fastq
C2-45-1	SRS4213268	214654449					C2	C10	DePCR	45C	MT	C	1	C10_DePCR_45C_MT_C_1_.fastq	C2-45-1	SRS4213268	214654449	214640447_Ankur089-C3-45-1_S89	C10	C2	DePCR	MT	45C	C	1	FLD0089	TATCAGTCTG	C	2.5	23399	23177	18888	7000	2.06445	2.23003	18.0549	31.6509	C10_DePCR_45C_MT_C_1_.fastq
C2-45-2	SRS4213269	214656463					C2	C10	DePCR	45C	MT	C	2	C10_DePCR_45C_MT_C_2_.fastq	C2-45-2	SRS4213269	214656463	214662461_Ankur090-C3-45-2_S90	C10	C2	DePCR	MT	45C	C	2	FLD0090	TCAGATGCTA	C	2.5	28498	28234	22916	7000	2.1739	2.25884	19.633	35.9162	C10_DePCR_45C_MT_C_2_.fastq
C2-45-3	SRS4213270	214646456					C2	C10	DePCR	45C	MT	C	3	C10_DePCR_45C_MT_C_3_.fastq	C2-45-3	SRS4213270	214646456	214640448_Ankur091-C3-45-3_S91	C10	C2	DePCR	MT	45C	C	3	FLD0091	TATGTACGTG	C	2.5	23609	23351	18716	7000	2.10928	2.24492	20.9187	33.5121	C10_DePCR_45C_MT_C_3_.fastq
C2-45-4	SRS4213271	214654451					C2	C10	DePCR	45C	MT	C	4	C10_DePCR_45C_MT_C_4_.fastq	C2-45-4	SRS4213271	214654451	214644443_Ankur092-C3-45-4_S92	C10	C2	DePCR	MT	45C	C	4	FLD0092	CTATACAGTG	C	2.5	32572	32283	26006	7000	2.26531	2.26556	21.033	33.5677	C10_DePCR_45C_MT_C_4_.fastq
C2-45-5	SRS4213264	214650455					C2	C10	DePCR	45C	MT	C	5	C10_DePCR_45C_MT_C_5_.fastq	C2-45-5	SRS4213264	214650455	214639451_Ankur093-C3-45-5_S93	C10	C2	DePCR	MT	45C	C	5	FLD0093	TGATACTCTG	C	2.5	1911	1894	1535	7000	2.01905	NA	NA	31.5567	C10_DePCR_45C_MT_C_5_.fastq
C2-45-6	SRS4213265	214650456					C2	C10	DePCR	45C	MT	C	6	C10_DePCR_45C_MT_C_6_.fastq	C2-45-6	SRS4213265	214650456	214639452_Ankur094-C3-45-6_S94	C10	C2	DePCR	MT	45C	C	6	FLD0094	TCAGCGATAT	C	2.5	20869	20631	16492	7000	2.27134	2.24119	20.9758	35.2616	C10_DePCR_45C_MT_C_6_.fastq
C2-45-7	SRS4213266	214662460					C2	C10	DePCR	45C	MT	C	7	C10_DePCR_45C_MT_C_7_.fastq	C2-45-7	SRS4213266	214662460	214651452_Ankur095-C3-45-7_S95	C10	C2	DePCR	MT	45C	C	7	FLD0095	CTACTGATGA	C	2.5	18607	18412	14836	7000	1.72671	2.25036	22.3187	33.0864	C10_DePCR_45C_MT_C_7_.fastq
C2-45-8	SRS4213267	214657457					C2	C10	DePCR	45C	MT	C	8	C10_DePCR_45C_MT_C_8_.fastq	C2-45-8	SRS4213267	214657457	214650458_Ankur096-C3-45-8_S96	C10	C2	DePCR	MT	45C	C	8	FLD0096	GTAGTACACA	C	2.5	38665	38351	31146	7000	2.20428	2.24206	18.3912	32.1101	C10_DePCR_45C_MT_C_8_.fastq
C2-55-1	SRS4213272	214653468					C2	C10	DePCR	55C	MT	C	1	C10_DePCR_55C_MT_C_1_.fastq	C2-55-1	SRS4213272	214653468	214660471_Ankur217-C3-55-1_S217	C10	C2	DePCR	MT	55C	C	1	FLD0281	TGTTACGATC	C	2.5	31585	31289	24825	7000	0.748448	2.23545	15.1187	41.6371	C10_DePCR_55C_MT_C_1_.fastq
C2-55-2	SRS4213273	214645462					C2	C10	DePCR	55C	MT	C	2	C10_DePCR_55C_MT_C_2_.fastq	C2-55-2	SRS4213273	214645462	214651463_Ankur218-C3-55-2_S218	C10	C2	DePCR	MT	55C	C	2	FLD0282	GTCTTGGCTC	C	2.5	31512	31209	24880	7000	0.809748	2.22807	12.4549	42.4835	C10_DePCR_55C_MT_C_2_.fastq
C2-55-3	SRS4213391	214645463					C2	C10	DePCR	55C	MT	C	3	C10_DePCR_55C_MT_C_3_.fastq	C2-55-3	SRS4213391	214645463	214660472_Ankur219-C3-55-3_S219	C10	C2	DePCR	MT	55C	C	3	FLD0283	GGTCGTGCAT	C	2.5	47160	46697	36436	7000	0.767862	2.22113	15.0681	40.2668	C10_DePCR_55C_MT_C_3_.fastq
C2-55-4	SRS4213390	214657472					C2	C10	DePCR	55C	MT	C	4	C10_DePCR_55C_MT_C_4_.fastq	C2-55-4	SRS4213390	214657472	214663456_Ankur220-C3-55-4_S220	C10	C2	DePCR	MT	55C	C	4	FLD0284	CAGGCTCAGT	C	2.5	35038	34719	27902	7000	0.775636	2.22659	13.5033	41.7062	C10_DePCR_55C_MT_C_4_.fastq
C2-55-5	SRS4213389	214646477					C2	C10	DePCR	55C	MT	C	5	C10_DePCR_55C_MT_C_5_.fastq	C2-55-5	SRS4213389	214646477	214657473_Ankur221-C3-55-5_S221	C10	C2	DePCR	MT	55C	C	5	FLD0285	TAGCTTCACT	C	2.5	35662	35332	28882	7000	0.735159	2.23105	14.9187	41.3188	C10_DePCR_55C_MT_C_5_.fastq
C2-55-6	SRS4213388	214652470					C2	C10	DePCR	55C	MT	C	6	C10_DePCR_55C_MT_C_6_.fastq	C2-55-6	SRS4213388	214652470	214665456_Ankur222-C3-55-6_S222	C10	C2	DePCR	MT	55C	C	6	FLD0286	CAGATGTCCT	C	2.5	36404	36083	29397	7000	0.754096	2.21568	15.5187	38.8354	C10_DePCR_55C_MT_C_6_.fastq
C2-55-7	SRS4213395	214648463					C2	C10	DePCR	55C	MT	C	7	C10_DePCR_55C_MT_C_7_.fastq	C2-55-7	SRS4213395	214648463	214646479_Ankur223-C3-55-7_S223	C10	C2	DePCR	MT	55C	C	7	FLD0287	TTACGCAGTG	C	2.5	26568	26316	21013	7000	0.768836	2.2104	13.3473	40.3323	C10_DePCR_55C_MT_C_7_.fastq
C2-55-8	SRS4213394	214654458					C2	C10	DePCR	55C	MT	C	8	C10_DePCR_55C_MT_C_8_.fastq	C2-55-8	SRS4213394	214654458	214645465_Ankur224-C3-55-8_S224	C10	C2	DePCR	MT	55C	C	8	FLD0288	TTCGTTCCTG	C	2.5	24228	23995	19495	7000	0.729524	2.22452	14.5187	39.704	C10_DePCR_55C_MT_C_8_.fastq
C2S-45-1	SRS4213384	217249056					C2	C10	TAS	45C	MT	C	1	C10_TAS_45C_MT_C_1_.fastq	C2S-45-1	SRS4213384	217249056	217244156_Ankur129-C3S-45-1_S147	C10	C2	TAS	MT	45C	C	1	FLD0241	CGTAATGAGC	C	2.5	31613	31450	27908	7000	6.24019	2.29896	47.8242	19.9881	C10_TAS_45C_MT_C_1_.fastq
C2S-45-2	SRS4213654	217240196					C2	C10	TAS	45C	MT	C	2	C10_TAS_45C_MT_C_2_.fastq	C2S-45-2	SRS4213654	217240196	217242165_Ankur130-C3S-45-2_S148	C10	C2	TAS	MT	45C	C	2	FLD0242	TTGCTTAGTC	C	2.5	27782	27671	24814	7000	6.4166	2.27085	47.7956	19.6866	C10_TAS_45C_MT_C_2_.fastq
C2S-45-3	SRS4213500	217239226					C2	C10	TAS	45C	MT	C	3	C10_TAS_45C_MT_C_3_.fastq	C2S-45-3	SRS4213500	217239226	217239229_Ankur131-C3S-45-3_S149	C10	C2	TAS	MT	45C	C	3	FLD0243	TCTTGTTCAC	C	2.5	30387	30250	27052	7000	6.1463	2.29306	48.5099	19.6323	C10_TAS_45C_MT_C_3_.fastq
C2S-45-4	SRS4213501	217241194					C2	C10	TAS	45C	MT	C	4	C10_TAS_45C_MT_C_4_.fastq	C2S-45-4	SRS4213501	217241194	217250034_Ankur132-C3S-45-4_S150	C10	C2	TAS	MT	45C	C	4	FLD0244	GTGGCTTCGT	C	2.5	26226	26072	23115	7000	6.51411	2.28476	51.1385	19.4231	C10_TAS_45C_MT_C_4_.fastq
C2S-45-5	SRS4213352	217238197					C2	C10	TAS	45C	MT	C	5	C10_TAS_45C_MT_C_5_.fastq	C2S-45-5	SRS4213352	217238197	217242167_Ankur133-C3S-45-5_S151	C10	C2	TAS	MT	45C	C	5	FLD0245	TGTTCGATAG	C	2.5	29212	29095	25973	7000	6.06094	2.28592	49.0813	21.0861	C10_TAS_45C_MT_C_5_.fastq
C2S-45-6	SRS4213350	217232261					C2	C10	TAS	45C	MT	C	6	C10_TAS_45C_MT_C_6_.fastq	C2S-45-6	SRS4213350	217232261	217236235_Ankur134-C3S-45-6_S152	C10	C2	TAS	MT	45C	C	6	FLD0246	TCATTCAGTG	C	2.5	26186	26050	23360	7000	6.39535	2.27544	48.9385	19.4731	C10_TAS_45C_MT_C_6_.fastq
C2S-45-7	SRS4213353	217242164					C2	C10	TAS	45C	MT	C	7	C10_TAS_45C_MT_C_7_.fastq	C2S-45-7	SRS4213353	217242164	217240198_Ankur135-C3S-45-7_S153	C10	C2	TAS	MT	45C	C	7	FLD0247	GTGGAGAGCT	C	2.5	26579	26444	23752	7000	6.29507	2.27331	49.3956	19.1147	C10_TAS_45C_MT_C_7_.fastq
C2S-45-8	SRS4213351	217238198					C2	C10	TAS	45C	MT	C	8	C10_TAS_45C_MT_C_8_.fastq	C2S-45-8	SRS4213351	217238198	217250036_Ankur136-C3S-45-8_S154	C10	C2	TAS	MT	45C	C	8	FLD0248	GTAGAAGTGG	C	2.5	28115	27978	24891	7000	6.38357	2.27404	47.7978	18.2958	C10_TAS_45C_MT_C_8_.fastq
C2S-55-1	SRS4213355	217235256					C2	C10	TAS	55C	MT	C	1	C10_TAS_55C_MT_C_1_.fastq	C2S-55-1	SRS4213355	217235256	217237284_Ankur217-C3S-55-1_S235	C10	C2	TAS	MT	55C	C	1	FLD0337	CACGAAGAGC	C	2.5	24438	24311	21358	7000	5.12631	2.29308	31.8044	16.7101	C10_TAS_55C_MT_C_1_.fastq
C2S-55-2	SRS4213354	217235257					C2	C10	TAS	55C	MT	C	2	C10_TAS_55C_MT_C_2_.fastq	C2S-55-2	SRS4213354	217235257	217235259_Ankur218-C3S-55-2_S236	C10	C2	TAS	MT	55C	C	2	FLD0338	CATACCTGAT	C	2.5	26552	26411	23605	7000	4.64307	2.28118	33.4549	16.7718	C10_TAS_55C_MT_C_2_.fastq
C2S-55-3	SRS4213357	217243188					C2	C10	TAS	55C	MT	C	3	C10_TAS_55C_MT_C_3_.fastq	C2S-55-3	SRS4213357	217243188	217239255_Ankur219-C3S-55-3_S237	C10	C2	TAS	MT	55C	C	3	FLD0339	GACGTGCTTC	C	2.5	20386	20268	17976	7000	4.9896	2.28599	35.0615	18.8351	C10_TAS_55C_MT_C_3_.fastq
C2S-55-4	SRS4213356	217239251					C2	C10	TAS	55C	MT	C	4	C10_TAS_55C_MT_C_4_.fastq	C2S-55-4	SRS4213356	217239251	217245182_Ankur220-C3S-55-4_S238	C10	C2	TAS	MT	55C	C	4	FLD0340	ATTGTGGAGT	C	2.5	26420	26262	23497	7000	4.84751	2.28771	33.433	18.9598	C10_TAS_55C_MT_C_4_.fastq
C2S-55-5	SRS4213359	217243189					C2	C10	TAS	55C	MT	C	5	C10_TAS_55C_MT_C_5_.fastq	C2S-55-5	SRS4213359	217243189	217236251_Ankur221-C3S-55-5_S239	C10	C2	TAS	MT	55C	C	5	FLD0341	TCTGGTCTCA	C	2.5	21560	21445	19187	7000	5.01155	2.29554	33.1121	17.5268	C10_TAS_55C_MT_C_5_.fastq
C2S-55-6	SRS4213358	217244185					C2	C10	TAS	55C	MT	C	6	C10_TAS_55C_MT_C_6_.fastq	C2S-55-6	SRS4213358	217244185	217237288_Ankur222-C3S-55-6_S240	C10	C2	TAS	MT	55C	C	6	FLD0342	AGGTAAGAGG	C	2.5	29203	29059	25873	7000	4.83529	2.29465	37.0615	17.2253	C10_TAS_55C_MT_C_6_.fastq
C2S-55-7	SRS4213464	217239252					C2	C10	TAS	55C	MT	C	7	C10_TAS_55C_MT_C_7_.fastq	C2S-55-7	SRS4213464	217239252	217231312_Ankur223-C3S-55-7_S241	C10	C2	TAS	MT	55C	C	7	FLD0343	TCCTGACAGA	C	2.5	25320	25215	22386	7000	4.86333	2.28849	34.9407	18.6404	C10_TAS_55C_MT_C_7_.fastq
C2S-55-8	SRS4213465	217232285					C2	C10	TAS	55C	MT	C	8	C10_TAS_55C_MT_C_8_.fastq	C2S-55-8	SRS4213465	217232285	217231313_Ankur224-C3S-55-8_S242	C10	C2	TAS	MT	55C	C	8	FLD0344	GCACTGTTGC	C	2.5	24251	24138	21399	7000	4.9369	2.28292	35.0549	18.4741	C10_TAS_55C_MT_C_8_.fastq
D1-45-1	SRS4213417	214657458					D1	D01	DePCR	45C	MT	D	1	D01_DePCR_45C_MT_D_1_.fastq	D1-45-1	SRS4213417	214657458	214657458_Ankur097-D1-45-1_S97	D01	D1	DePCR	MT	45C	D	1	FLD0097	TGCTACATCA	D	2.5	26583	26343	21862	7000	6.74516	0.346505	19.6286	0	D01_DePCR_45C_MT_D_1_.fastq
D1-45-2	SRS4213416	214662463					D1	D01	DePCR	45C	MT	D	2	D01_DePCR_45C_MT_D_2_.fastq	D1-45-2	SRS4213416	214662463	214662463_Ankur098-D1-45-2_S98	D01	D1	DePCR	MT	45C	D	2	FLD0098	AGTGTGTCTA	D	2.5	46973	46368	38114	7000	6.08926	0.378107	21.1143	0	D01_DePCR_45C_MT_D_2_.fastq
D1-45-3	SRS4213411	214646459					D1	D01	DePCR	45C	MT	D	3	D01_DePCR_45C_MT_D_3_.fastq	D1-45-3	SRS4213411	214646459	214646459_Ankur099-D1-45-3_S99	D01	D1	DePCR	MT	45C	D	3	FLD0099	TCATATCGCG	D	2.5	21124	20926	16985	7000	7.42843	0.327413	18.0857	0	D01_DePCR_45C_MT_D_3_.fastq
D1-45-4	SRS4213410	214656464					D1	D01	DePCR	45C	MT	D	4	D01_DePCR_45C_MT_D_4_.fastq	D1-45-4	SRS4213410	214656464	214656464_Ankur100-D1-45-4_S100	D01	D1	DePCR	MT	45C	D	4	FLD0100	TACGTATAGC	D	2.5	9509	9415	7339	7000	6.36691	NA	NA	0	D01_DePCR_45C_MT_D_4_.fastq
D1-45-5	SRS4213413	214646461					D1	D01	DePCR	45C	MT	D	5	D01_DePCR_45C_MT_D_5_.fastq	D1-45-5	SRS4213413	214646461	214646461_Ankur101-D1-45-5_S101	D01	D1	DePCR	MT	45C	D	5	FLD0101	CAGCTATAGC	D	2.5	14365	14225	11268	7000	7.32753	0.321571	19.6	0	D01_DePCR_45C_MT_D_5_.fastq
D1-45-6	SRS4213412	214651453					D1	D01	DePCR	45C	MT	D	6	D01_DePCR_45C_MT_D_6_.fastq	D1-45-6	SRS4213412	214651453	214651453_Ankur102-D1-45-6_S102	D01	D1	DePCR	MT	45C	D	6	FLD0102	TCGATGCGCT	D	2.5	25686	25408	20691	7000	6.84427	0.300893	18.4	0	D01_DePCR_45C_MT_D_6_.fastq
D1-45-7	SRS4213409	214648449					D1	D01	DePCR	45C	MT	D	7	D01_DePCR_45C_MT_D_7_.fastq	D1-45-7	SRS4213409	214648449	214648449_Ankur103-D1-45-7_S103	D01	D1	DePCR	MT	45C	D	7	FLD0103	GCACGCGTAT	D	2.5	19249	19016	15600	7000	6.71024	0.383312	23.1714	0	D01_DePCR_45C_MT_D_7_.fastq
D1-45-8	SRS4213408	214652457					D1	D01	DePCR	45C	MT	D	8	D01_DePCR_45C_MT_D_8_.fastq	D1-45-8	SRS4213408	214652457	214652457_Ankur104-D1-45-8_S104	D01	D1	DePCR	MT	45C	D	8	FLD0104	GCAGTATGCG	D	2.5	31063	30702	24633	7000	6.65003	0.347082	21.0571	0	D01_DePCR_45C_MT_D_8_.fastq
D1-55-1	SRS4213460	214660473					D1	D01	DePCR	55C	MT	D	1	D01_DePCR_55C_MT_D_1_.fastq	D1-55-1	SRS4213460	214660473	214660473_Ankur225-D1-55-1_S225	D01	D1	DePCR	MT	55C	D	1	FLD0289	CACTGCTTGA	D	2.5	24637	24413	20108	7000	7.01815	0.544964	29.2857	0	D01_DePCR_55C_MT_D_1_.fastq
D1-55-2	SRS4213458	214654459					D1	D01	DePCR	55C	MT	D	2	D01_DePCR_55C_MT_D_2_.fastq	D1-55-2	SRS4213458	214654459	214654459_Ankur226-D1-55-2_S226	D01	D1	DePCR	MT	55C	D	2	FLD0290	TCTAGCGTGG	D	2.5	30792	30485	24576	7000	7.00063	0.543051	27.6	0	D01_DePCR_55C_MT_D_2_.fastq
D1-55-3	SRS4213461	214662475					D1	D01	DePCR	55C	MT	D	3	D01_DePCR_55C_MT_D_3_.fastq	D1-55-3	SRS4213461	214662475	214662475_Ankur227-D1-55-3_S227	D01	D1	DePCR	MT	55C	D	3	FLD0291	GCATAATCGC	D	2.5	36513	36117	29300	7000	6.71669	0.500622	29.1429	0	D01_DePCR_55C_MT_D_3_.fastq
D1-55-4	SRS4213459	214656470					D1	D01	DePCR	55C	MT	D	4	D01_DePCR_55C_MT_D_4_.fastq	D1-55-4	SRS4213459	214656470	214656470_Ankur228-D1-55-4_S228	D01	D1	DePCR	MT	55C	D	4	FLD0292	GTCGTAACAC	D	2.5	36378	36008	29837	7000	6.6258	0.514556	27.5429	0	D01_DePCR_55C_MT_D_4_.fastq
D1-55-5	SRS4213455	214650470					D1	D01	DePCR	55C	MT	D	5	D01_DePCR_55C_MT_D_5_.fastq	D1-55-5	SRS4213455	214650470	214650470_Ankur229-D1-55-5_S229	D01	D1	DePCR	MT	55C	D	5	FLD0293	GAGATTGCTA	D	2.5	39965	39621	32734	7000	6.77943	0.504136	27.0571	0	D01_DePCR_55C_MT_D_5_.fastq
D1-55-6	SRS4213454	214647469					D1	D01	DePCR	55C	MT	D	6	D01_DePCR_55C_MT_D_6_.fastq	D1-55-6	SRS4213454	214647469	214647469_Ankur230-D1-55-6_S230	D01	D1	DePCR	MT	55C	D	6	FLD0294	GGACAGATGG	D	2.5	43163	42758	34977	7000	6.75112	0.519036	26.6	0	D01_DePCR_55C_MT_D_6_.fastq
D1-55-7	SRS4213457	214651464					D1	D01	DePCR	55C	MT	D	7	D01_DePCR_55C_MT_D_7_.fastq	D1-55-7	SRS4213457	214651464	214651464_Ankur231-D1-55-7_S231	D01	D1	DePCR	MT	55C	D	7	FLD0295	CTTACGTTGC	D	2.5	23263	23034	18464	7000	7.23792	0.57553	26.6857	0	D01_DePCR_55C_MT_D_7_.fastq
D1-55-8	SRS4213456	214661480					D1	D01	DePCR	55C	MT	D	8	D01_DePCR_55C_MT_D_8_.fastq	D1-55-8	SRS4213456	214661480	214661480_Ankur232-D1-55-8_S232	D01	D1	DePCR	MT	55C	D	8	FLD0296	GTGTTCGGTC	D	2.5	37514	37084	30064	7000	6.45277	0.508558	29.0571	0	D01_DePCR_55C_MT_D_8_.fastq
D1S-45-1	SRS4213583	217235232					D1	D01	TAS	45C	MT	D	1	D01_TAS_45C_MT_D_1_.fastq	D1S-45-1	SRS4213583	217235232	217235232_Ankur137-D1S-45-1_S155	D01	D1	TAS	MT	45C	D	1	FLD0249	TGGAGCATGT	D	2.5	31201	31056	28216	7000	4.03719	0.0620374	66.3143	0	D01_TAS_45C_MT_D_1_.fastq
D1S-45-2	SRS4213582	217247068					D1	D01	TAS	45C	MT	D	2	D01_TAS_45C_MT_D_2_.fastq	D1S-45-2	SRS4213582	217247068	217247068_Ankur138-D1S-45-2_S156	D01	D1	TAS	MT	45C	D	2	FLD0250	GAAGGAGATA	D	2.5	29454	29336	26666	7000	4.06711	0.067697	65.7714	0	D01_TAS_45C_MT_D_2_.fastq
D1S-45-3	SRS4213436	217239232					D1	D01	TAS	45C	MT	D	3	D01_TAS_45C_MT_D_3_.fastq	D1S-45-3	SRS4213436	217239232	217239232_Ankur139-D1S-45-3_S157	D01	D1	TAS	MT	45C	D	3	FLD0251	CGAATGTATG	D	2.5	33468	33330	30150	7000	3.78359	0.0531973	66.2	0	D01_TAS_45C_MT_D_3_.fastq
D1S-45-4	SRS4213437	217235235					D1	D01	TAS	45C	MT	D	4	D01_TAS_45C_MT_D_4_.fastq	D1S-45-4	SRS4213437	217235235	217235235_Ankur140-D1S-45-4_S158	D01	D1	TAS	MT	45C	D	4	FLD0252	TCGTGAATGA	D	2.5	29655	29535	26771	7000	3.95586	0.0702736	65.4857	0	D01_TAS_45C_MT_D_4_.fastq
D1S-45-5	SRS4213438	217242168					D1	D01	TAS	45C	MT	D	5	D01_TAS_45C_MT_D_5_.fastq	D1S-45-5	SRS4213438	217242168	217242168_Ankur141-D1S-45-5_S159	D01	D1	TAS	MT	45C	D	5	FLD0253	GAATAGCTGA	D	2.5	32384	32261	29212	7000	3.92327	0.0721493	65.9429	0	D01_TAS_45C_MT_D_5_.fastq
D1S-45-6	SRS4213439	217239233					D1	D01	TAS	45C	MT	D	6	D01_TAS_45C_MT_D_6_.fastq	D1S-45-6	SRS4213439	217239233	217239233_Ankur142-D1S-45-6_S160	D01	D1	TAS	MT	45C	D	6	FLD0254	TTGTCACATC	D	2.5	29672	29559	26717	7000	3.94614	0.0602105	65.9143	0	D01_TAS_45C_MT_D_6_.fastq
D1S-45-7	SRS4213440	217239234					D1	D01	TAS	45C	MT	D	7	D01_TAS_45C_MT_D_7_.fastq	D1S-45-7	SRS4213440	217239234	217239234_Ankur143-D1S-45-7_S161	D01	D1	TAS	MT	45C	D	7	FLD0255	CTGGAGGCTA	D	2.5	27414	27272	24393	7000	3.99546	0.0628781	66.5429	0	D01_TAS_45C_MT_D_7_.fastq
D1S-45-8	SRS4213441	217241199					D1	D01	TAS	45C	MT	D	8	D01_TAS_45C_MT_D_8_.fastq	D1S-45-8	SRS4213441	217241199	217241199_Ankur144-D1S-45-8_S162	D01	D1	TAS	MT	45C	D	8	FLD0256	TGTCAGCTTA	D	2.5	30279	30173	27329	7000	4.02416	0.0587202	65.4571	0	D01_TAS_45C_MT_D_8_.fastq
D1S-55-1	SRS4213309	217243192					D1	D01	TAS	55C	MT	D	1	D01_TAS_55C_MT_D_1_.fastq	D1S-55-1	SRS4213309	217243192	217243192_Ankur225-D1S-55-1_S243	D01	D1	TAS	MT	55C	D	1	FLD0345	ACCATGAGTC	D	2.5	27267	27135	24618	7000	5.73114	0.0572496	71.3143	0	D01_TAS_55C_MT_D_1_.fastq
D1S-55-2	SRS4213315	217240217					D1	D01	TAS	55C	MT	D	2	D01_TAS_55C_MT_D_2_.fastq	D1S-55-2	SRS4213315	217240217	217240217_Ankur226-D1S-55-2_S244	D01	D1	TAS	MT	55C	D	2	FLD0346	AATGCAGTGT	D	2.5	30957	30809	27899	7000	5.68319	0.0666488	71.3429	0	D01_TAS_55C_MT_D_2_.fastq
D1S-55-3	SRS4213543	217236252					D1	D01	TAS	55C	MT	D	3	D01_TAS_55C_MT_D_3_.fastq	D1S-55-3	SRS4213543	217236252	217236252_Ankur227-D1S-55-3_S245	D01	D1	TAS	MT	55C	D	3	FLD0347	ATATGGTGGA	D	2.5	28039	27883	25078	7000	5.99349	0.0627837	70.8857	0	D01_TAS_55C_MT_D_3_.fastq
D1S-55-4	SRS4213544	217244191					D1	D01	TAS	55C	MT	D	4	D01_TAS_55C_MT_D_4_.fastq	D1S-55-4	SRS4213544	217244191	217244191_Ankur228-D1S-55-4_S246	D01	D1	TAS	MT	55C	D	4	FLD0348	ACTCAGTTAC	D	2.5	31942	31785	28713	7000	5.64844	0.0667198	70.5714	0	D01_TAS_55C_MT_D_4_.fastq
D1S-55-5	SRS4213316	217245186					D1	D01	TAS	55C	MT	D	5	D01_TAS_55C_MT_D_5_.fastq	D1S-55-5	SRS4213316	217245186	217245186_Ankur229-D1S-55-5_S247	D01	D1	TAS	MT	55C	D	5	FLD0349	AAGTGCGATG	D	2.5	24473	24320	21912	7000	5.99335	0.0750589	71.0571	0	D01_TAS_55C_MT_D_5_.fastq
D1S-55-6	SRS4213317	217232290					D1	D01	TAS	55C	MT	D	6	D01_TAS_55C_MT_D_6_.fastq	D1S-55-6	SRS4213317	217232290	217232290_Ankur230-D1S-55-6_S248	D01	D1	TAS	MT	55C	D	6	FLD0350	CCACAGAGTG	D	2.5	27490	27339	24772	7000	5.69792	0.0613103	70.9143	0	D01_TAS_55C_MT_D_6_.fastq
D1S-55-7	SRS4213319	217243195					D1	D01	TAS	55C	MT	D	7	D01_TAS_55C_MT_D_7_.fastq	D1S-55-7	SRS4213319	217243195	217243195_Ankur231-D1S-55-7_S249	D01	D1	TAS	MT	55C	D	7	FLD0351	AGTGGTGATC	D	2.5	26453	26322	23854	7000	5.89687	0.057727	70.8	0	D01_TAS_55C_MT_D_7_.fastq
D1S-55-8	SRS4213318	217244192					D1	D01	TAS	55C	MT	D	8	D01_TAS_55C_MT_D_8_.fastq	D1S-55-8	SRS4213318	217244192	217244192_Ankur232-D1S-55-8_S250	D01	D1	TAS	MT	55C	D	8	FLD0352	ACTTCTTAGC	D	2.5	26285	26161	23549	7000	5.88853	0.0678279	70.8286	0	D01_TAS_55C_MT_D_8_.fastq
D2-45-1	SRS4213371	214661465					D2	D10	DePCR	45C	MT	D	1	D10_DePCR_45C_MT_D_1_.fastq	D2-45-1	SRS4213371	214661465	214661465_Ankur105-D2-45-1_S105	D10	D2	DePCR	MT	45C	D	1	FLD0105	TGATAGAGAG	D	2.5	22515	22329	18081	7000	4.0687	2.24146	9.88571	34.0361	D10_DePCR_45C_MT_D_1_.fastq
D2-45-2	SRS4213450	214652458					D2	D10	DePCR	45C	MT	D	2	D10_DePCR_45C_MT_D_2_.fastq	D2-45-2	SRS4213450	214652458	214652458_Ankur106-D2-45-2_S106	D10	D2	DePCR	MT	45C	D	2	FLD0106	GCTACTAGCG	D	2.5	24098	23845	19020	7000	3.30685	2.22332	10.2762	40.0763	D10_DePCR_45C_MT_D_2_.fastq
D2-45-3	SRS4213329	214653455					D2	D10	DePCR	45C	MT	D	3	D10_DePCR_45C_MT_D_3_.fastq	D2-45-3	SRS4213329	214653455	214653455_Ankur107-D2-45-3_S107	D10	D2	DePCR	MT	45C	D	3	FLD0107	TGCGAGACGT	D	2.5	22752	22534	17952	7000	4.31878	2.24115	10.8	33.607	D10_DePCR_45C_MT_D_3_.fastq
D2-45-4	SRS4213328	214657460					D2	D10	DePCR	45C	MT	D	4	D10_DePCR_45C_MT_D_4_.fastq	D2-45-4	SRS4213328	214657460	214657460_Ankur108-D2-45-4_S108	D10	D2	DePCR	MT	45C	D	4	FLD0108	CGATGACAGA	D	2.5	26538	26300	21134	7000	4.41767	2.25882	10.0571	34.1167	D10_DePCR_45C_MT_D_4_.fastq
D2-45-5	SRS4213326	214652460					D2	D10	DePCR	45C	MT	D	5	D10_DePCR_45C_MT_D_5_.fastq	D2-45-5	SRS4213326	214652460	214652460_Ankur109-D2-45-5_S109	D10	D2	DePCR	MT	45C	D	5	FLD0109	GACTCATGCT	D	2.5	24433	24218	19785	7000	3.43212	2.21613	7.4381	39.1418	D10_DePCR_45C_MT_D_5_.fastq
D2-45-6	SRS4213327	214660464					D2	D10	DePCR	45C	MT	D	6	D10_DePCR_45C_MT_D_6_.fastq	D2-45-6	SRS4213327	214660464	214660464_Ankur110-D2-45-6_S110	D10	D2	DePCR	MT	45C	D	6	FLD0110	GTCTGATACG	D	2.5	28027	27745	22285	7000	3.54932	2.24312	8.82857	36.0927	D10_DePCR_45C_MT_D_6_.fastq
D2-45-7	SRS4213324	214661467					D2	D10	DePCR	45C	MT	D	7	D10_DePCR_45C_MT_D_7_.fastq	D2-45-7	SRS4213324	214661467	214661467_Ankur111-D2-45-7_S111	D10	D2	DePCR	MT	45C	D	7	FLD0111	ACTAGCTGTC	D	2.5	42952	42435	34233	7000	3.12183	2.21881	9.67619	42.8343	D10_DePCR_45C_MT_D_7_.fastq
D2-45-8	SRS4213325	214659458					D2	D10	DePCR	45C	MT	D	8	D10_DePCR_45C_MT_D_8_.fastq	D2-45-8	SRS4213325	214659458	214659458_Ankur112-D2-45-8_S112	D10	D2	DePCR	MT	45C	D	8	FLD0112	GCGTAGACGA	D	2.5	19214	18691	14687	7000	2.96595	2.22017	9.30476	43.5799	D10_DePCR_45C_MT_D_8_.fastq
D2-55-1	SRS4213322	214660474					D2	D10	DePCR	55C	MT	D	1	D10_DePCR_55C_MT_D_1_.fastq	D2-55-1	SRS4213322	214660474	214660474_Ankur233-D2-55-1_S233	D10	D2	DePCR	MT	55C	D	1	FLD0297	CTCAAGAAGC	D	2.5	26441	26226	20809	7000	1.48648	1.89185	15.6476	89.2992	D10_DePCR_55C_MT_D_1_.fastq
D2-55-2	SRS4213323	214657475					D2	D10	DePCR	55C	MT	D	2	D10_DePCR_55C_MT_D_2_.fastq	D2-55-2	SRS4213323	214657475	214657475_Ankur234-D2-55-2_S234	D10	D2	DePCR	MT	55C	D	2	FLD0298	TCTCGGATAG	D	2.5	25810	25537	20371	7000	1.51384	1.92161	17.3048	87.315	D10_DePCR_55C_MT_D_2_.fastq
D2-55-3	SRS4213320	214647470					D2	D10	DePCR	55C	MT	D	3	D10_DePCR_55C_MT_D_3_.fastq	D2-55-3	SRS4213320	214647470	214647470_Ankur235-D2-55-3_S235	D10	D2	DePCR	MT	55C	D	3	FLD0299	CTCTGGACGA	D	2.5	33346	33060	26216	7000	1.41272	1.87312	17.1619	91.568	D10_DePCR_55C_MT_D_3_.fastq
D2-55-4	SRS4213321	214652471					D2	D10	DePCR	55C	MT	D	4	D10_DePCR_55C_MT_D_4_.fastq	D2-55-4	SRS4213321	214652471	214652471_Ankur236-D2-55-4_S236	D10	D2	DePCR	MT	55C	D	4	FLD0300	CGAGCATTGT	D	2.5	24922	24680	19709	7000	1.36031	1.89568	16.5333	88.8437	D10_DePCR_55C_MT_D_4_.fastq
D2-55-5	SRS4213742	214645467					D2	D10	DePCR	55C	MT	D	5	D10_DePCR_55C_MT_D_5_.fastq	D2-55-5	SRS4213742	214645467	214645467_Ankur237-D2-55-5_S237	D10	D2	DePCR	MT	55C	D	5	FLD0301	CCAAGAAGAA	D	2.5	39692	39325	31685	7000	1.41907	1.92042	18.219	89.5996	D10_DePCR_55C_MT_D_5_.fastq
D2-55-6	SRS4213741	214662476					D2	D10	DePCR	55C	MT	D	6	D10_DePCR_55C_MT_D_6_.fastq	D2-55-6	SRS4213741	214662476	214662476_Ankur238-D2-55-6_S238	D10	D2	DePCR	MT	55C	D	6	FLD0302	TCCTTGTTCT	D	2.5	2874	2823	2233	7000	0.73012	NA	NA	92.7019	D10_DePCR_55C_MT_D_6_.fastq
D2-55-7	SRS4213740	214659467					D2	D10	DePCR	55C	MT	D	7	D10_DePCR_55C_MT_D_7_.fastq	D2-55-7	SRS4213740	214659467	214659467_Ankur239-D2-55-7_S239	D10	D2	DePCR	MT	55C	D	7	FLD0303	GTAACGATGT	D	2.5	43015	42602	33211	7000	1.5133	1.91714	20.0762	86.9927	D10_DePCR_55C_MT_D_7_.fastq
D2-55-8	SRS4213739	214654460					D2	D10	DePCR	55C	MT	D	8	D10_DePCR_55C_MT_D_8_.fastq	D2-55-8	SRS4213739	214654460	214654460_Ankur240-D2-55-8_S240	D10	D2	DePCR	MT	55C	D	8	FLD0304	TGGACTCAGA	D	2.5	28699	28451	22793	7000	1.52437	1.90068	17.1905	88.5936	D10_DePCR_55C_MT_D_8_.fastq
D2S-45-1	SRS4213313	217243174					D2	D10	TAS	45C	MT	D	1	D10_TAS_45C_MT_D_1_.fastq	D2S-45-1	SRS4213313	217243174	217243174_Ankur145-D2S-45-1_S163	D10	D2	TAS	MT	45C	D	1	FLD0257	GTTCTTCGTA	D	2.5	30771	30609	27733	7000	11.307	2.34746	44.1429	15.1868	D10_TAS_45C_MT_D_1_.fastq
D2S-45-2	SRS4213312	217228321					D2	D10	TAS	45C	MT	D	2	D10_TAS_45C_MT_D_2_.fastq	D2S-45-2	SRS4213312	217228321	217228321_Ankur146-D2S-45-2_S164	D10	D2	TAS	MT	45C	D	2	FLD0258	TTACACGTTC	D	2.5	29168	29054	26288	7000	11.3164	2.3586	45.0286	17.9097	D10_TAS_45C_MT_D_2_.fastq
D2S-45-3	SRS4213445	217232265					D2	D10	TAS	45C	MT	D	3	D10_TAS_45C_MT_D_3_.fastq	D2S-45-3	SRS4213445	217232265	217232265_Ankur147-D2S-45-3_S165	D10	D2	TAS	MT	45C	D	3	FLD0259	GTAGCCAGTA	D	2.5	26246	26141	23434	7000	11.6348	2.35047	44.5714	18.4302	D10_TAS_45C_MT_D_3_.fastq
D2S-45-4	SRS4213314	217243175					D2	D10	TAS	45C	MT	D	4	D10_TAS_45C_MT_D_4_.fastq	D2S-45-4	SRS4213314	217243175	217243175_Ankur148-D2S-45-4_S166	D10	D2	TAS	MT	45C	D	4	FLD0260	TGAGAAGGTA	D	2.5	31827	31693	28625	7000	11.3069	2.34519	45	16.2778	D10_TAS_45C_MT_D_4_.fastq
D2S-45-5	SRS4213386	217232266					D2	D10	TAS	45C	MT	D	5	D10_TAS_45C_MT_D_5_.fastq	D2S-45-5	SRS4213386	217232266	217232266_Ankur149-D2S-45-5_S167	D10	D2	TAS	MT	45C	D	5	FLD0261	CCATATGATC	D	2.5	25754	25620	22911	7000	11.6532	2.34566	45.7143	16.5933	D10_TAS_45C_MT_D_5_.fastq
D2S-45-6	SRS4213308	217244162					D2	D10	TAS	45C	MT	D	6	D10_TAS_45C_MT_D_6_.fastq	D2S-45-6	SRS4213308	217244162	217244162_Ankur150-D2S-45-6_S168	D10	D2	TAS	MT	45C	D	6	FLD0262	CGATCCTATA	D	2.5	24648	24538	22063	7000	11.1329	2.35515	45.2	16.9194	D10_TAS_45C_MT_D_6_.fastq
D2S-45-7	SRS4213678	217242171					D2	D10	TAS	45C	MT	D	7	D10_TAS_45C_MT_D_7_.fastq	D2S-45-7	SRS4213678	217242171	217242171_Ankur151-D2S-45-7_S169	D10	D2	TAS	MT	45C	D	7	FLD0263	TGACTAGCTT	D	2.5	24909	24800	22402	7000	11.5637	2.35176	45.5714	16.7662	D10_TAS_45C_MT_D_7_.fastq
D2S-45-8	SRS4213679	217245164					D2	D10	TAS	45C	MT	D	8	D10_TAS_45C_MT_D_8_.fastq	D2S-45-8	SRS4213679	217245164	217245164_Ankur152-D2S-45-8_S170	D10	D2	TAS	MT	45C	D	8	FLD0264	TAACTCTGCT	D	2.5	25293	25176	22744	7000	11.1182	2.35077	46.1143	15.6244	D10_TAS_45C_MT_D_8_.fastq
D2S-55-1	SRS4213676	217242196					D2	D10	TAS	55C	MT	D	1	D10_TAS_55C_MT_D_1_.fastq	D2S-55-1	SRS4213676	217242196	217242196_Ankur233-D2S-55-1_S251	D10	D2	TAS	MT	55C	D	1	FLD0353	GCCACATATA	D	2.5	25601	25491	22937	7000	9.12401	2.36306	36.1143	15.1172	D10_TAS_55C_MT_D_1_.fastq
D2S-55-2	SRS4213677	217245187					D2	D10	TAS	55C	MT	D	2	D10_TAS_55C_MT_D_2_.fastq	D2S-55-2	SRS4213677	217245187	217245187_Ankur234-D2S-55-2_S252	D10	D2	TAS	MT	55C	D	2	FLD0354	ACGCAGGAGT	D	2.5	29209	29014	26001	7000	9.40089	2.35667	36.4857	14.2179	D10_TAS_55C_MT_D_2_.fastq
D2S-55-3	SRS4213674	217235263					D2	D10	TAS	55C	MT	D	3	D10_TAS_55C_MT_D_3_.fastq	D2S-55-3	SRS4213674	217235263	217235263_Ankur235-D2S-55-3_S253	D10	D2	TAS	MT	55C	D	3	FLD0355	AATATGCTGC	D	2.5	20625	20502	18239	7000	9.39924	2.35745	37	16.6303	D10_TAS_55C_MT_D_3_.fastq
D2S-55-4	SRS4213675	217232292					D2	D10	TAS	55C	MT	D	4	D10_TAS_55C_MT_D_4_.fastq	D2S-55-4	SRS4213675	217232292	217232292_Ankur236-D2S-55-4_S254	D10	D2	TAS	MT	55C	D	4	FLD0356	AAGCGTAGAA	D	2.5	6210	6189	5573	7000	9.76552	NA	NA	16.2588	D10_TAS_55C_MT_D_4_.fastq
D2S-55-5	SRS4213672	217251063					D2	D10	TAS	55C	MT	D	5	D10_TAS_55C_MT_D_5_.fastq	D2S-55-5	SRS4213672	217251063	217251063_Ankur237-D2S-55-5_S255	D10	D2	TAS	MT	55C	D	5	FLD0357	GACAGCAAGC	D	2.5	21433	21335	18894	7000	9.43306	2.35721	38.0857	15.2601	D10_TAS_55C_MT_D_5_.fastq
D2S-55-6	SRS4213673	217241219					D2	D10	TAS	55C	MT	D	6	D10_TAS_55C_MT_D_6_.fastq	D2S-55-6	SRS4213673	217241219	217241219_Ankur238-D2S-55-6_S256	D10	D2	TAS	MT	55C	D	6	FLD0358	CTGACCGAGA	D	2.5	24865	24736	22073	7000	9.30626	2.36525	36.3429	14.2651	D10_TAS_55C_MT_D_6_.fastq
D2S-55-7	SRS4213670	217240219					D2	D10	TAS	55C	MT	D	7	D10_TAS_55C_MT_D_7_.fastq	D2S-55-7	SRS4213670	217240219	217240219_Ankur239-D2S-55-7_S257	D10	D2	TAS	MT	55C	D	7	FLD0359	CGCGACTTGT	D	2.5	27110	27000	24659	7000	8.96787	2.35542	37.2286	14.7701	D10_TAS_55C_MT_D_7_.fastq
D2S-55-8	SRS4213671	217245190					D2	D10	TAS	55C	MT	D	8	D10_TAS_55C_MT_D_8_.fastq	D2S-55-8	SRS4213671	217245190	217245190_Ankur240-D2S-55-8_S258	D10	D2	TAS	MT	55C	D	8	FLD0360	CATCAACATG	D	2.5	26631	26497	23933	7000	8.85168	2.35132	34.7714	14.0664	D10_TAS_55C_MT_D_8_.fastq
E1-45-1	SRS4213738	214647457					E1	E01	DePCR	45C	MT	E	1	E01_DePCR_45C_MT_E_1_.fastq	E1-45-1	SRS4213738	214647457	214647457_Ankur113-E1-45-1_S113	E01	E1	DePCR	MT	45C	E	1	FLD0113	CTCAGCAGTG	E	2.5	17954	17755	14378	7000	4.8056	0.182389	5.42857	0	E01_DePCR_45C_MT_E_1_.fastq
E1-45-2	SRS4213737	214652462					E1	E01	DePCR	45C	MT	E	2	E01_DePCR_45C_MT_E_2_.fastq	E1-45-2	SRS4213737	214652462	214652462_Ankur114-E1-45-2_S114	E01	E1	DePCR	MT	45C	E	2	FLD0114	CAGTCTACAT	E	2.5	24672	24411	20002	7000	4.96807	0.208295	5.8	0	E01_DePCR_45C_MT_E_2_.fastq
E1-45-3	SRS4213736	214640451					E1	E01	DePCR	45C	MT	E	3	E01_DePCR_45C_MT_E_3_.fastq	E1-45-3	SRS4213736	214640451	214640451_Ankur115-E1-45-3_S115	E01	E1	DePCR	MT	45C	E	3	FLD0115	TACTGCAGCG	E	2.5	21154	20919	16559	7000	4.84444	0.221728	7.88571	0	E01_DePCR_45C_MT_E_3_.fastq
E1-45-4	SRS4213735	214651455					E1	E01	DePCR	45C	MT	E	4	E01_DePCR_45C_MT_E_4_.fastq	E1-45-4	SRS4213735	214651455	214651455_Ankur116-E1-45-4_S116	E01	E1	DePCR	MT	45C	E	4	FLD0116	TACACAGTAG	E	2.5	15133	14973	12007	7000	4.82593	0.212935	7.65714	0	E01_DePCR_45C_MT_E_4_.fastq
E1-45-5	SRS4213744	214657461					E1	E01	DePCR	45C	MT	E	5	E01_DePCR_45C_MT_E_5_.fastq	E1-45-5	SRS4213744	214657461	214657461_Ankur117-E1-45-5_S117	E01	E1	DePCR	MT	45C	E	5	FLD0117	CACATACAGT	E	2.5	14755	14584	11636	7000	5.17017	0.192498	8.82857	0	E01_DePCR_45C_MT_E_5_.fastq
E1-45-6	SRS4213743	214661468					E1	E01	DePCR	45C	MT	E	6	E01_DePCR_45C_MT_E_6_.fastq	E1-45-6	SRS4213743	214661468	214661468_Ankur118-E1-45-6_S118	E01	E1	DePCR	MT	45C	E	6	FLD0118	CACAGTGATG	E	2.5	24694	24445	19869	7000	4.73695	0.208504	7.8	0	E01_DePCR_45C_MT_E_6_.fastq
E1-45-7	SRS4213586	214661469					E1	E01	DePCR	45C	MT	E	7	E01_DePCR_45C_MT_E_7_.fastq	E1-45-7	SRS4213586	214661469	214661469_Ankur119-E1-45-7_S119	E01	E1	DePCR	MT	45C	E	7	FLD0119	CGAGCTAGCA	E	2.5	21029	20810	16711	7000	5.1294	0.197789	6.4	0	E01_DePCR_45C_MT_E_7_.fastq
E1-45-8	SRS4213587	214659460					E1	E01	DePCR	45C	MT	E	8	E01_DePCR_45C_MT_E_8_.fastq	E1-45-8	SRS4213587	214659460	214659460_Ankur120-E1-45-8_S120	E01	E1	DePCR	MT	45C	E	8	FLD0120	GAGACTATGC	E	2.5	9461	9213	7390	7000	4.58355	NA	NA	0	E01_DePCR_45C_MT_E_8_.fastq
E1-55-1	SRS4213588	214657476					E1	E01	DePCR	55C	MT	E	1	E01_DePCR_55C_MT_E_1_.fastq	E1-55-1	SRS4213588	214657476	214657476_Ankur241-E1-55-1_S241	E01	E1	DePCR	MT	55C	E	1	FLD0305	GGCATCATGC	E	2.5	34679	34280	26860	7000	4.69854	0.176301	8.14286	0	E01_DePCR_55C_MT_E_1_.fastq
E1-55-2	SRS4213589	214647471					E1	E01	DePCR	55C	MT	E	2	E01_DePCR_55C_MT_E_2_.fastq	E1-55-2	SRS4213589	214647471	214647471_Ankur242-E1-55-2_S242	E01	E1	DePCR	MT	55C	E	2	FLD0306	GTATAACGCT	E	2.5	43759	43317	35609	7000	4.40274	0.178672	9.08571	0	E01_DePCR_55C_MT_E_2_.fastq
E1-55-3	SRS4213590	214646480					E1	E01	DePCR	55C	MT	E	3	E01_DePCR_55C_MT_E_3_.fastq	E1-55-3	SRS4213590	214646480	214646480_Ankur243-E1-55-3_S243	E01	E1	DePCR	MT	55C	E	3	FLD0307	GCAGATAAGT	E	2.5	51624	51058	41729	7000	4.60231	0.195947	7.02857	0	E01_DePCR_55C_MT_E_3_.fastq
E1-55-4	SRS4213591	214662477					E1	E01	DePCR	55C	MT	E	4	E01_DePCR_55C_MT_E_4_.fastq	E1-55-4	SRS4213591	214662477	214662477_Ankur244-E1-55-4_S244	E01	E1	DePCR	MT	55C	E	4	FLD0308	GTCGGCTCTA	E	2.5	32441	32088	25959	7000	4.81219	0.183996	6.97143	0	E01_DePCR_55C_MT_E_4_.fastq
E1-55-5	SRS4213592	214653469					E1	E01	DePCR	55C	MT	E	5	E01_DePCR_55C_MT_E_5_.fastq	E1-55-5	SRS4213592	214653469	214653469_Ankur245-E1-55-5_S245	E01	E1	DePCR	MT	55C	E	5	FLD0309	TTCGATAGCA	E	2.5	41458	41067	33124	7000	5.00682	0.206693	6.08571	0	E01_DePCR_55C_MT_E_5_.fastq
E1-55-6	SRS4213593	214650471					E1	E01	DePCR	55C	MT	E	6	E01_DePCR_55C_MT_E_6_.fastq	E1-55-6	SRS4213593	214650471	214650471_Ankur246-E1-55-6_S246	E01	E1	DePCR	MT	55C	E	6	FLD0310	GTCTAGCAGG	E	2.5	43875	43356	34807	7000	4.72497	0.200596	8.6	0	E01_DePCR_55C_MT_E_6_.fastq
E1-55-7	SRS4213584	214665457					E1	E01	DePCR	55C	MT	E	7	E01_DePCR_55C_MT_E_7_.fastq	E1-55-7	SRS4213584	214665457	214665457_Ankur247-E1-55-7_S247	E01	E1	DePCR	MT	55C	E	7	FLD0311	GGAACACAGG	E	2.5	44915	44436	36034	7000	4.66538	0.176805	6.9619	0	E01_DePCR_55C_MT_E_7_.fastq
E1-55-8	SRS4213585	214660477					E1	E01	DePCR	55C	MT	E	8	E01_DePCR_55C_MT_E_8_.fastq	E1-55-8	SRS4213585	214660477	214660477_Ankur248-E1-55-8_S248	E01	E1	DePCR	MT	55C	E	8	FLD0312	TGGTTCGCTG	E	2.5	27323	27005	21769	7000	4.91751	0.209251	6.85714	0	E01_DePCR_55C_MT_E_8_.fastq
E1S-45-1	SRS4213759	217249065					E1	E01	TAS	45C	MT	E	1	E01_TAS_45C_MT_E_1_.fastq	E1S-45-1	SRS4213759	217249065	217249065_Ankur153-E1S-45-1_S171	E01	E1	TAS	MT	45C	E	1	FLD0265	TCGAATGTGC	E	2.5	26996	26830	23882	7000	6.49367	0.0513935	20.8952	0	E01_TAS_45C_MT_E_1_.fastq
E1S-45-2	SRS4213758	217247075					E1	E01	TAS	45C	MT	E	2	E01_TAS_45C_MT_E_2_.fastq	E1S-45-2	SRS4213758	217247075	217247075_Ankur154-E1S-45-2_S172	E01	E1	TAS	MT	45C	E	2	FLD0266	TCGCTGAACA	E	2.5	27815	27685	24954	7000	6.56961	0.057373	20.0667	0	E01_TAS_45C_MT_E_2_.fastq
E1S-45-3	SRS4213757	217244165					E1	E01	TAS	45C	MT	E	3	E01_TAS_45C_MT_E_3_.fastq	E1S-45-3	SRS4213757	217244165	217244165_Ankur155-E1S-45-3_S173	E01	E1	TAS	MT	45C	E	3	FLD0267	GCGTTATTGC	E	2.5	30288	30132	26985	7000	6.86045	0.0657379	20.3238	0	E01_TAS_45C_MT_E_3_.fastq
E1S-45-4	SRS4213756	217235239					E1	E01	TAS	45C	MT	E	4	E01_TAS_45C_MT_E_4_.fastq	E1S-45-4	SRS4213756	217235239	217235239_Ankur156-E1S-45-4_S174	E01	E1	TAS	MT	45C	E	4	FLD0268	GAACTATCAC	E	2.5	28376	28269	25602	7000	7.0027	0.0627683	18.981	0	E01_TAS_45C_MT_E_4_.fastq
E1S-45-5	SRS4213763	217237256					E1	E01	TAS	45C	MT	E	5	E01_TAS_45C_MT_E_5_.fastq	E1S-45-5	SRS4213763	217237256	217237256_Ankur157-E1S-45-5_S175	E01	E1	TAS	MT	45C	E	5	FLD0269	TCGAGGTACT	E	2.5	30608	30478	27475	7000	6.78253	0.0594509	20.0667	0	E01_TAS_45C_MT_E_5_.fastq
E1S-45-6	SRS4213762	217244166					E1	E01	TAS	45C	MT	E	6	E01_TAS_45C_MT_E_6_.fastq	E1S-45-6	SRS4213762	217244166	217244166_Ankur158-E1S-45-6_S176	E01	E1	TAS	MT	45C	E	6	FLD0270	TGCGGATGGT	E	2.5	28866	28702	25789	7000	6.75299	0.0569197	22.5524	0	E01_TAS_45C_MT_E_6_.fastq
E1S-45-7	SRS4213761	217244167					E1	E01	TAS	45C	MT	E	7	E01_TAS_45C_MT_E_7_.fastq	E1S-45-7	SRS4213761	217244167	217244167_Ankur159-E1S-45-7_S177	E01	E1	TAS	MT	45C	E	7	FLD0271	TTCGAGCTAT	E	2.5	24171	24063	21674	7000	7.01494	0.0582593	19.6095	0	E01_TAS_45C_MT_E_7_.fastq
E1S-45-8	SRS4213760	217247080					E1	E01	TAS	45C	MT	E	8	E01_TAS_45C_MT_E_8_.fastq	E1S-45-8	SRS4213760	217247080	217247080_Ankur160-E1S-45-8_S178	E01	E1	TAS	MT	45C	E	8	FLD0272	GGTCTGGTGT	E	2.5	25606	25469	22985	7000	6.69978	0.076415	19.7238	0	E01_TAS_45C_MT_E_8_.fastq
E1S-55-1	SRS4213765	217251065					E1	E01	TAS	55C	MT	E	1	E01_TAS_55C_MT_E_1_.fastq	E1S-55-1	SRS4213765	217251065	217251065_Ankur241-E1S-55-1_S259	E01	E1	TAS	MT	55C	E	1	FLD0361	TGGCTACGCT	E	2.5	23840	23758	21124	7000	6.99276	0.0621264	20.1524	0	E01_TAS_55C_MT_E_1_.fastq
E1S-55-2	SRS4213764	217249088					E1	E01	TAS	55C	MT	E	2	E01_TAS_55C_MT_E_2_.fastq	E1S-55-2	SRS4213764	217249088	217249088_Ankur242-E1S-55-2_S260	E01	E1	TAS	MT	55C	E	2	FLD0362	ACGCGGACTA	E	2.5	33675	33455	29973	7000	7.03189	0.0887113	20.8952	0	E01_TAS_55C_MT_E_2_.fastq
E1S-55-3	SRS4213611	217246112					E1	E01	TAS	55C	MT	E	3	E01_TAS_55C_MT_E_3_.fastq	E1S-55-3	SRS4213611	217246112	217246112_Ankur243-E1S-55-3_S261	E01	E1	TAS	MT	55C	E	3	FLD0363	AGAGGTCGGA	E	2.5	28128	27990	24862	7000	6.96996	0.065218	20.8667	0	E01_TAS_55C_MT_E_3_.fastq
E1S-55-4	SRS4213610	217244195					E1	E01	TAS	55C	MT	E	4	E01_TAS_55C_MT_E_4_.fastq	E1S-55-4	SRS4213610	217244195	217244195_Ankur244-E1S-55-4_S262	E01	E1	TAS	MT	55C	E	4	FLD0364	AATCGAGCGT	E	2.5	29128	28969	25990	7000	6.55221	0.0707595	20.1429	0	E01_TAS_55C_MT_E_4_.fastq
E1S-55-5	SRS4213612	217250053					E1	E01	TAS	55C	MT	E	5	E01_TAS_55C_MT_E_5_.fastq	E1S-55-5	SRS4213612	217250053	217250053_Ankur245-E1S-55-5_S263	E01	E1	TAS	MT	55C	E	5	FLD0365	AAGTACACTC	E	2.5	27961	27830	25169	7000	6.80066	0.0698882	20.2095	0	E01_TAS_55C_MT_E_5_.fastq
E1S-55-6	SRS4213613	217245192					E1	E01	TAS	55C	MT	E	6	E01_TAS_55C_MT_E_6_.fastq	E1S-55-6	SRS4213613	217245192	217245192_Ankur246-E1S-55-6_S264	E01	E1	TAS	MT	55C	E	6	FLD0366	AGCTGAATGA	E	2.5	28106	27970	25141	7000	6.60726	0.066455	21.2095	0	E01_TAS_55C_MT_E_6_.fastq
E1S-55-7	SRS4213606	217238232					E1	E01	TAS	55C	MT	E	7	E01_TAS_55C_MT_E_7_.fastq	E1S-55-7	SRS4213606	217238232	217238232_Ankur247-E1S-55-7_S265	E01	E1	TAS	MT	55C	E	7	FLD0367	ATGCCTATCA	E	2.5	26632	26486	23883	7000	6.79002	0.048847	21.581	0	E01_TAS_55C_MT_E_7_.fastq
E1S-55-8	SRS4213607	217238235					E1	E01	TAS	55C	MT	E	8	E01_TAS_55C_MT_E_8_.fastq	E1S-55-8	SRS4213607	217238235	217238235_Ankur248-E1S-55-8_S266	E01	E1	TAS	MT	55C	E	8	FLD0368	ACTGTAGGAC	E	2.5	29200	29045	26132	7000	7.04095	0.0670028	21.2095	0	E01_TAS_55C_MT_E_8_.fastq
E2-45-1	SRS4213521	214657463					E2	E10	DePCR	45C	MT	E	1	E10_DePCR_45C_MT_E_1_.fastq	E2-45-1	SRS4213521	214657463	214657463_Ankur121-E2-45-1_S121	E10	E2	DePCR	MT	45C	E	1	FLD0121	CAGAGCTAGT	E	2.5	13078	12947	10236	7000	3.18803	2.1936	6.82857	44.9796	E10_DePCR_45C_MT_E_1_.fastq
E2-45-2	SRS4213520	214651456					E2	E10	DePCR	45C	MT	E	2	E10_DePCR_45C_MT_E_2_.fastq	E2-45-2	SRS4213520	214651456	214651456_Ankur122-E2-45-2_S122	E10	E2	DePCR	MT	45C	E	2	FLD0122	CGCAGAGCAT	E	2.5	15626	15467	11986	7000	3.05626	2.17267	4.69524	47.3232	E10_DePCR_45C_MT_E_2_.fastq
E2-45-3	SRS4213523	214653456					E2	E10	DePCR	45C	MT	E	3	E10_DePCR_45C_MT_E_3_.fastq	E2-45-3	SRS4213523	214653456	214653456_Ankur123-E2-45-3_S123	E10	E2	DePCR	MT	45C	E	3	FLD0123	TGTACAGCGA	E	2.5	24247	24007	18837	7000	3.17946	2.18333	6	45.2681	E10_DePCR_45C_MT_E_3_.fastq
E2-45-4	SRS4213522	214651457					E2	E10	DePCR	45C	MT	E	4	E10_DePCR_45C_MT_E_4_.fastq	E2-45-4	SRS4213522	214651457	214651457_Ankur124-E2-45-4_S124	E10	E2	DePCR	MT	45C	E	4	FLD0124	ACGTCAGTAT	E	2.5	50452	49850	39461	7000	2.79756	2.1347	7.28571	54.0076	E10_DePCR_45C_MT_E_4_.fastq
E2-45-5	SRS4213525	214653457					E2	E10	DePCR	45C	MT	E	5	E10_DePCR_45C_MT_E_5_.fastq	E2-45-5	SRS4213525	214653457	214653457_Ankur125-E2-45-5_S125	E10	E2	DePCR	MT	45C	E	5	FLD0125	TCACAGCATA	E	2.5	20356	20156	15962	7000	3.15402	2.18135	6.17143	46.1287	E10_DePCR_45C_MT_E_5_.fastq
E2-45-6	SRS4213524	214656467					E2	E10	DePCR	45C	MT	E	6	E10_DePCR_45C_MT_E_6_.fastq	E2-45-6	SRS4213524	214656467	214656467_Ankur126-E2-45-6_S126	E10	E2	DePCR	MT	45C	E	6	FLD0126	ACTGCGTGTC	E	2.5	46462	45967	35953	7000	2.71261	2.12651	5.62857	52.6092	E10_DePCR_45C_MT_E_6_.fastq
E2-45-7	SRS4213527	214652463					E2	E10	DePCR	45C	MT	E	7	E10_DePCR_45C_MT_E_7_.fastq	E2-45-7	SRS4213527	214652463	214652463_Ankur127-E2-45-7_S127	E10	E2	DePCR	MT	45C	E	7	FLD0127	CGATCGACTG	E	2.5	7750	7674	6031	7000	3.02817	NA	NA	53.2867	E10_DePCR_45C_MT_E_7_.fastq
E2-45-8	SRS4213526	214647458					E2	E10	DePCR	45C	MT	E	8	E10_DePCR_45C_MT_E_8_.fastq	E2-45-8	SRS4213526	214647458	214647458_Ankur128-E2-45-8_S128	E10	E2	DePCR	MT	45C	E	8	FLD0128	GCGAGATGTA	E	2.5	18152	17778	13425	7000	2.66631	2.11394	5.05714	50.6087	E10_DePCR_45C_MT_E_8_.fastq
E2-55-1	SRS4213529	214653470					E2	E10	DePCR	55C	MT	E	1	E10_DePCR_55C_MT_E_1_.fastq	E2-55-1	SRS4213529	214653470	214653470_Ankur249-E2-55-1_S249	E10	E2	DePCR	MT	55C	E	1	FLD0313	CACATTAGCG	E	2.5	9997	9192	6594	7000	1.71771	NA	NA	84.4263	E10_DePCR_55C_MT_E_1_.fastq
E2-55-2	SRS4213528	214662478					E2	E10	DePCR	55C	MT	E	2	E10_DePCR_55C_MT_E_2_.fastq	E2-55-2	SRS4213528	214662478	214662478_Ankur250-E2-55-2_S250	E10	E2	DePCR	MT	55C	E	2	FLD0314	GAAGCGCACT	E	2.5	17048	16423	12629	7000	1.62632	1.7301	4.05714	84.6149	E10_DePCR_55C_MT_E_2_.fastq
E2-55-3	SRS4213362	214652472					E2	E10	DePCR	55C	MT	E	3	E10_DePCR_55C_MT_E_3_.fastq	E2-55-3	SRS4213362	214652472	214652472_Ankur251-E2-55-3_S251	E10	E2	DePCR	MT	55C	E	3	FLD0315	GCATGCCAGT	E	2.5	47195	46724	37162	7000	1.61343	1.71337	5.31429	90.0662	E10_DePCR_55C_MT_E_3_.fastq
E2-55-4	SRS4213363	214651465					E2	E10	DePCR	55C	MT	E	4	E10_DePCR_55C_MT_E_4_.fastq	E2-55-4	SRS4213363	214651465	214651465_Ankur252-E2-55-4_S252	E10	E2	DePCR	MT	55C	E	4	FLD0316	GGAGACTGTA	E	2.5	46247	45852	36673	7000	1.6017	1.70465	4.13333	88.6302	E10_DePCR_55C_MT_E_4_.fastq
E2-55-5	SRS4213360	214644464					E2	E10	DePCR	55C	MT	E	5	E10_DePCR_55C_MT_E_5_.fastq	E2-55-5	SRS4213360	214644464	214644464_Ankur253-E2-55-5_S253	E10	E2	DePCR	MT	55C	E	5	FLD0317	TCGAACTGCA	E	2.5	30684	30402	24288	7000	1.60495	1.69294	2.44762	91.8965	E10_DePCR_55C_MT_E_5_.fastq
E2-55-6	SRS4213361	214654461					E2	E10	DePCR	55C	MT	E	6	E10_DePCR_55C_MT_E_6_.fastq	E2-55-6	SRS4213361	214654461	214654461_Ankur254-E2-55-6_S254	E10	E2	DePCR	MT	55C	E	6	FLD0318	GAGAGGACAT	E	2.5	39796	39445	31219	7000	1.63482	1.68923	3	90.3483	E10_DePCR_55C_MT_E_6_.fastq
E2-55-7	SRS4213366	214647472					E2	E10	DePCR	55C	MT	E	7	E10_DePCR_55C_MT_E_7_.fastq	E2-55-7	SRS4213366	214647472	214647472_Ankur255-E2-55-7_S255	E10	E2	DePCR	MT	55C	E	7	FLD0319	GAGCACGGAA	E	2.5	35375	35047	27550	7000	1.60157	1.68378	3.05714	88.7671	E10_DePCR_55C_MT_E_7_.fastq
E2-55-8	SRS4213367	214660478					E2	E10	DePCR	55C	MT	E	8	E10_DePCR_55C_MT_E_8_.fastq	E2-55-8	SRS4213367	214660478	214660478_Ankur256-E2-55-8_S256	E10	E2	DePCR	MT	55C	E	8	FLD0320	GCTCTAACAT	E	2.5	43691	43195	34776	7000	1.58411	1.68467	5.11429	88.7309	E10_DePCR_55C_MT_E_8_.fastq
E2S-45-1	SRS4213608	217251035					E2	E10	TAS	45C	MT	E	1	E10_TAS_45C_MT_E_1_.fastq	E2S-45-1	SRS4213608	217251035	217251035_Ankur161-E2S-45-1_S179	E10	E2	TAS	MT	45C	E	1	FLD0273	CTAAGTCATG	E	2.5	24418	24278	21624	7000	7.13537	2.33612	21.5429	19.5594	E10_TAS_45C_MT_E_1_.fastq
E2S-45-2	SRS4213609	217240205					E2	E10	TAS	45C	MT	E	2	E10_TAS_45C_MT_E_2_.fastq	E2S-45-2	SRS4213609	217240205	217240205_Ankur162-E2S-45-2_S180	E10	E2	TAS	MT	45C	E	2	FLD0274	TTGCAGATCA	E	2.5	25648	25505	22880	7000	6.65915	2.32601	22.1143	21.7733	E10_TAS_45C_MT_E_2_.fastq
E2S-45-3	SRS4213614	217251036					E2	E10	TAS	45C	MT	E	3	E10_TAS_45C_MT_E_3_.fastq	E2S-45-3	SRS4213614	217251036	217251036_Ankur163-E2S-45-3_S181	E10	E2	TAS	MT	45C	E	3	FLD0275	CTGCGAATGT	E	2.5	27482	27324	24389	7000	7.48718	2.3283	21.8571	21.0355	E10_TAS_45C_MT_E_3_.fastq
E2S-45-4	SRS4213615	217245166					E2	E10	TAS	45C	MT	E	4	E10_TAS_45C_MT_E_4_.fastq	E2S-45-4	SRS4213615	217245166	217245166_Ankur164-E2S-45-4_S182	E10	E2	TAS	MT	45C	E	4	FLD0276	CTGTTCTAGC	E	2.5	21522	21398	18919	7000	7.02882	2.32774	21.6857	18.6081	E10_TAS_45C_MT_E_4_.fastq
E2S-45-5	SRS4213306	217235243					E2	E10	TAS	45C	MT	E	5	E10_TAS_45C_MT_E_5_.fastq	E2S-45-5	SRS4213306	217235243	217235243_Ankur165-E2S-45-5_S183	E10	E2	TAS	MT	45C	E	5	FLD0277	CACTTGTGTG	E	2.5	24946	24834	22080	7000	7.02658	2.33548	23.1143	19.9109	E10_TAS_45C_MT_E_5_.fastq
E2S-45-6	SRS4213307	217249067					E2	E10	TAS	45C	MT	E	6	E10_TAS_45C_MT_E_6_.fastq	E2S-45-6	SRS4213307	217249067	217249067_Ankur166-E2S-45-6_S184	E10	E2	TAS	MT	45C	E	6	FLD0278	TGGATGACAT	E	2.5	28964	28839	25810	7000	6.91854	2.33084	21.7714	20.9229	E10_TAS_45C_MT_E_6_.fastq
E2S-45-7	SRS4213304	217247082					E2	E10	TAS	45C	MT	E	7	E10_TAS_45C_MT_E_7_.fastq	E2S-45-7	SRS4213304	217247082	217247082_Ankur167-E2S-45-7_S185	E10	E2	TAS	MT	45C	E	7	FLD0279	GATCCTGAGC	E	2.5	25218	25107	22117	7000	7.29194	2.3202	21.5714	21.2209	E10_TAS_45C_MT_E_7_.fastq
E2S-45-8	SRS4213305	217244170					E2	E10	TAS	45C	MT	E	8	E10_TAS_45C_MT_E_8_.fastq	E2S-45-8	SRS4213305	217244170	217244170_Ankur168-E2S-45-8_S186	E10	E2	TAS	MT	45C	E	8	FLD0280	GTCGGTCTGA	E	2.5	27437	27297	24399	7000	6.98991	2.32633	19.6	20.8211	E10_TAS_45C_MT_E_8_.fastq
E2S-55-1	SRS4213310	217242204					E2	E10	TAS	55C	MT	E	1	E10_TAS_55C_MT_E_1_.fastq	E2S-55-1	SRS4213310	217242204	217242204_Ankur249-E2S-55-1_S267	E10	E2	TAS	MT	55C	E	1	FLD0369	ATAGCCGTGT	E	2.5	24368	24235	21449	7000	5.94536	2.33209	21.7714	23.9061	E10_TAS_55C_MT_E_1_.fastq
E2S-55-2	SRS4213311	217242205					E2	E10	TAS	55C	MT	E	2	E10_TAS_55C_MT_E_2_.fastq	E2S-55-2	SRS4213311	217242205	217242205_Ankur250-E2S-55-2_S268	E10	E2	TAS	MT	55C	E	2	FLD0370	TCACGACGAA	E	2.5	23957	23826	21072	7000	6.04867	2.32812	21.3143	22.9253	E10_TAS_55C_MT_E_2_.fastq
E2S-55-3	SRS4213700	217231323					E2	E10	TAS	55C	MT	E	3	E10_TAS_55C_MT_E_3_.fastq	E2S-55-3	SRS4213700	217231323	217231323_Ankur251-E2S-55-3_S269	E10	E2	TAS	MT	55C	E	3	FLD0371	ATCTGTCCAT	E	2.5	25882	25764	22984	7000	6.45106	2.32653	24	20.9709	E10_TAS_55C_MT_E_3_.fastq
E2S-55-4	SRS4213711	217240222					E2	E10	TAS	55C	MT	E	4	E10_TAS_55C_MT_E_4_.fastq	E2S-55-4	SRS4213711	217240222	217240222_Ankur252-E2S-55-4_S270	E10	E2	TAS	MT	55C	E	4	FLD0372	ACTTAGAGAG	E	2.5	28828	28656	25681	7000	6.30827	2.32748	20.8571	21.4609	E10_TAS_55C_MT_E_4_.fastq
E2S-55-5	SRS4213444	217242207					E2	E10	TAS	55C	MT	E	5	E10_TAS_55C_MT_E_5_.fastq	E2S-55-5	SRS4213444	217242207	217242207_Ankur253-E2S-55-5_S271	E10	E2	TAS	MT	55C	E	5	FLD0373	AGTGGCAGGT	E	2.5	30349	30189	26729	7000	6.21509	2.31491	21.0286	21.7476	E10_TAS_55C_MT_E_5_.fastq
E2S-55-6	SRS4213746	217244197					E2	E10	TAS	55C	MT	E	6	E10_TAS_55C_MT_E_6_.fastq	E2S-55-6	SRS4213746	217244197	217244197_Ankur254-E2S-55-6_S272	E10	E2	TAS	MT	55C	E	6	FLD0374	ATGAGGTCGT	E	2.5	28277	28126	25067	7000	6.07887	2.31683	20.8	21.9592	E10_TAS_55C_MT_E_6_.fastq
E2S-55-7	SRS4213531	217251068					E2	E10	TAS	55C	MT	E	7	E10_TAS_55C_MT_E_7_.fastq	E2S-55-7	SRS4213531	217251068	217251068_Ankur255-E2S-55-7_S273	E10	E2	TAS	MT	55C	E	7	FLD0375	AGGAGAAGGA	E	2.5	29573	29425	26299	7000	6.05323	2.31725	19.5429	21.4973	E10_TAS_55C_MT_E_7_.fastq
E2S-55-8	SRS4213530	217247097					E2	E10	TAS	55C	MT	E	8	E10_TAS_55C_MT_E_8_.fastq	E2S-55-8	SRS4213530	217247097	217247097_Ankur256-E2S-55-8_S274	E10	E2	TAS	MT	55C	E	8	FLD0376	ACAACTGCAA	E	2.5	26922	26763	23625	7000	6.13451	2.34805	21.4571	22.0716	E10_TAS_55C_MT_E_8_.fastq
DT-DePCR-45-01	#N/A		SRP488285	PRJNA1072695	SRR27878345	SAMN39749629	A1	A1	DePCR	45C	DT	A		DT-DePCR-45-01_S118_L001_R1_001.fastq.gz	DT-DePCR-45-01				A01	A1	DePCR	DT	45C	A	1	FLD0001	GTATCGTCGT	A	2.5	36912	36659	31124	none	31124	0	0	0	DT-DePCR-45-01_S118_L001_R1_001.fastq.gz	SRP488285	PRJNA1072695	SRR27878345	SAMN39749629
DT-DePCR-45-02	#N/A		SRP488286	PRJNA1072696	SRR27878344	SAMN39749630	A1	A1	DePCR	45C	DT	A		DT-DePCR-45-02_S119_L001_R1_001.fastq.gz	DT-DePCR-45-02				A01	A1	DePCR	DT	45C	A	2	FLD0002	GTGTATGCGT	A	2.5	33390	33128	28213	none	28213	0	0	0	DT-DePCR-45-02_S119_L001_R1_001.fastq.gz	SRP488285	PRJNA1072695	SRR27878344	SAMN39749630
DT-DePCR-45-03	#N/A		SRP488287	PRJNA1072697	SRR27878256	SAMN39749631	A1	A1	DePCR	45C	DT	A		DT-DePCR-45-03_S120_L001_R1_001.fastq.gz	DT-DePCR-45-03				A01	A1	DePCR	DT	45C	A	3	FLD0003	TGCTCGTAGT	A	2.5	36567	36252	30969	none	30969	0	0	0	DT-DePCR-45-03_S120_L001_R1_001.fastq.gz	SRP488285	PRJNA1072695	SRR27878256	SAMN39749631
DT-DePCR-45-04	#N/A		SRP488288	PRJNA1072698	SRR27878245	SAMN39749632	A1	A1	DePCR	45C	DT	A		DT-DePCR-45-04_S121_L001_R1_001.fastq.gz	DT-DePCR-45-04				A01	A1	DePCR	DT	45C	A	4	FLD0004	GTCGTCGTCT	A	2.5	33817	33566	28437	none	28437	0	0	0	DT-DePCR-45-04_S121_L001_R1_001.fastq.gz	SRP488285	PRJNA1072695	SRR27878245	SAMN39749632
DT-DePCR-45-05	#N/A		SRP488289	PRJNA1072699	SRR27878234	SAMN39749633	A1	A1	DePCR	45C	DT	A		DT-DePCR-45-05_S122_L001_R1_001.fastq.gz	DT-DePCR-45-05				A01	A1	DePCR	DT	45C	A	5	FLD0005	GTGCGTGTGT	A	2.5	33155	32891	28069	none	28069	0	0	0	DT-DePCR-45-05_S122_L001_R1_001.fastq.gz	SRP488285	PRJNA1072695	SRR27878234	SAMN39749633
DT-DePCR-45-06	#N/A		SRP488290	PRJNA1072700	SRR27878223	SAMN39749634	A1	A1	DePCR	45C	DT	A		DT-DePCR-45-06_S123_L001_R1_001.fastq.gz	DT-DePCR-45-06				A01	A1	DePCR	DT	45C	A	6	FLD0006	GCGTCGTGTA	A	2.5	29480	29224	24952	none	24952	0	0	0	DT-DePCR-45-06_S123_L001_R1_001.fastq.gz	SRP488285	PRJNA1072695	SRR27878223	SAMN39749634
DT-DePCR-45-07	#N/A		SRP488291	PRJNA1072701	SRR27878212	SAMN39749635	A1	A1	DePCR	45C	DT	A		DT-DePCR-45-07_S124_L001_R1_001.fastq.gz	DT-DePCR-45-07				A01	A1	DePCR	DT	45C	A	7	FLD0007	GTCGTGTACT	A	2.5	30357	30133	25537	none	25537	0	0	0	DT-DePCR-45-07_S124_L001_R1_001.fastq.gz	SRP488285	PRJNA1072695	SRR27878212	SAMN39749635
DT-DePCR-45-08	#N/A		SRP488292	PRJNA1072702	SRR27878201	SAMN39749636	A1	A1	DePCR	45C	DT	A		DT-DePCR-45-08_S125_L001_R1_001.fastq.gz	DT-DePCR-45-08				A01	A1	DePCR	DT	45C	A	8	FLD0008	GATGTAGCGT	A	2.5	15340	15201	12762	none	12762	0	0	0	DT-DePCR-45-08_S125_L001_R1_001.fastq.gz	SRP488285	PRJNA1072695	SRR27878201	SAMN39749636
DT-DePCR-55-01	#N/A		SRP488293	PRJNA1072703	SRR27878309	SAMN39749637	A1	A1	DePCR	55C	DT	A		DT-DePCR-55-01_S126_L001_R1_001.fastq.gz	DT-DePCR-55-01				A01	A1	DePCR	DT	55C	A	1	FLD0009	GAGTGATCGT	A	2.5	35951	35687	30011	none	30011	0	0	0	DT-DePCR-55-01_S126_L001_R1_001.fastq.gz	SRP488285	PRJNA1072695	SRR27878309	SAMN39749637
DT-DePCR-55-02	#N/A		SRP488294	PRJNA1072704	SRR27878298	SAMN39749638	A1	A1	DePCR	55C	DT	A		DT-DePCR-55-02_S127_L001_R1_001.fastq.gz	DT-DePCR-55-02				A01	A1	DePCR	DT	55C	A	2	FLD0010	CGCTATCAGT	A	2.5	41397	41085	34765	none	34765	0	0	0	DT-DePCR-55-02_S127_L001_R1_001.fastq.gz	SRP488285	PRJNA1072695	SRR27878298	SAMN39749638
DT-DePCR-55-03	#N/A		SRP488295	PRJNA1072705	SRR27878343	SAMN39749639	A1	A1	DePCR	55C	DT	A		DT-DePCR-55-03_S128_L001_R1_001.fastq.gz	DT-DePCR-55-03				A01	A1	DePCR	DT	55C	A	3	FLD0011	CGCTGTAGTC	A	2.5	40745	40457	34419	none	34419	0	0	0	DT-DePCR-55-03_S128_L001_R1_001.fastq.gz	SRP488285	PRJNA1072695	SRR27878343	SAMN39749639
DT-DePCR-55-04	#N/A		SRP488296	PRJNA1072706	SRR27878332	SAMN39749640	A1	A1	DePCR	55C	DT	A		DT-DePCR-55-04_S129_L001_R1_001.fastq.gz	DT-DePCR-55-04				A01	A1	DePCR	DT	55C	A	4	FLD0012	GCTAGTGAGT	A	2.5	36329	36100	30376	none	30376	0	0	0	DT-DePCR-55-04_S129_L001_R1_001.fastq.gz	SRP488285	PRJNA1072695	SRR27878332	SAMN39749640
DT-DePCR-55-05	#N/A		SRP488297	PRJNA1072707	SRR27878321	SAMN39749641	A1	A1	DePCR	55C	DT	A		DT-DePCR-55-05_S130_L001_R1_001.fastq.gz	DT-DePCR-55-05				A01	A1	DePCR	DT	55C	A	5	FLD0013	GAGCTAGTGA	A	2.5	42804	42444	35844	none	35844	0	0	0	DT-DePCR-55-05_S130_L001_R1_001.fastq.gz	SRP488285	PRJNA1072695	SRR27878321	SAMN39749641
DT-DePCR-55-06	#N/A		SRP488298	PRJNA1072708	SRR27878285	SAMN39749642	A1	A1	DePCR	55C	DT	A		DT-DePCR-55-06_S131_L001_R1_001.fastq.gz	DT-DePCR-55-06				A01	A1	DePCR	DT	55C	A	6	FLD0014	CGTGCTGTCA	A	2.5	33278	33051	27963	none	27963	0	0	0	DT-DePCR-55-06_S131_L001_R1_001.fastq.gz	SRP488285	PRJNA1072695	SRR27878285	SAMN39749642
DT-DePCR-55-07	#N/A		SRP488299	PRJNA1072709	SRR27878274	SAMN39749643	A1	A1	DePCR	55C	DT	A		DT-DePCR-55-07_S132_L001_R1_001.fastq.gz	DT-DePCR-55-07				A01	A1	DePCR	DT	55C	A	7	FLD0015	GATCGTCTCT	A	2.5	49651	49342	41858	none	41858	0	0	0	DT-DePCR-55-07_S132_L001_R1_001.fastq.gz	SRP488285	PRJNA1072695	SRR27878274	SAMN39749643
DT-DePCR-55-08	#N/A		SRP488300	PRJNA1072710	SRR27878263	SAMN39749644	A1	A1	DePCR	55C	DT	A		DT-DePCR-55-08_S133_L001_R1_001.fastq.gz	DT-DePCR-55-08				A01	A1	DePCR	DT	55C	A	8	FLD0016	GTGCTGTCGT	A	2.5	40744	40447	34186	none	34186	0	0	0	DT-DePCR-55-08_S133_L001_R1_001.fastq.gz	SRP488285	PRJNA1072695	SRR27878263	SAMN39749644
DT-PCR-45-01	#N/A		SRP488301	PRJNA1072711	SRR27878260	SAMN39749645	A1	A1	PCR	45C	DT	A		DT-PCR-45-01_S58_L001_R1_001.fastq.gz	DT-PCR-45-01				A01	A1	PCR	DT	45C	A	1	FLD0193	TTGTTGCTGT	A	2.5	37311	37227	34670	none	34670	0	0	0	DT-PCR-45-01_S58_L001_R1_001.fastq.gz	SRP488285	PRJNA1072695	SRR27878260	SAMN39749645
DT-PCR-45-02	#N/A		SRP488302	PRJNA1072712	SRR27878259	SAMN39749646	A1	A1	PCR	45C	DT	A		DT-PCR-45-02_S59_L001_R1_001.fastq.gz	DT-PCR-45-02				A01	A1	PCR	DT	45C	A	2	FLD0194	GTGTGGTTGT	A	2.5	41428	41352	38656	none	38656	0	0	0	DT-PCR-45-02_S59_L001_R1_001.fastq.gz	SRP488285	PRJNA1072695	SRR27878259	SAMN39749646
DT-PCR-45-03	#N/A		SRP488303	PRJNA1072713	SRR27878258	SAMN39749647	A1	A1	PCR	45C	DT	A		DT-PCR-45-03_S60_L001_R1_001.fastq.gz	DT-PCR-45-03				A01	A1	PCR	DT	45C	A	3	FLD0195	TAGGTGGAAT	A	2.5	37367	37292	34859	none	34859	0	0	0	DT-PCR-45-03_S60_L001_R1_001.fastq.gz	SRP488285	PRJNA1072695	SRR27878258	SAMN39749647
DT-PCR-45-04	#N/A		SRP488304	PRJNA1072714	SRR27878257	SAMN39749648	A1	A1	PCR	45C	DT	A		DT-PCR-45-04_S61_L001_R1_001.fastq.gz	DT-PCR-45-04				A01	A1	PCR	DT	45C	A	4	FLD0196	TGTAGGTGGA	A	2.5	39393	39291	36692	none	36692	0	0	0	DT-PCR-45-04_S61_L001_R1_001.fastq.gz	SRP488285	PRJNA1072695	SRR27878257	SAMN39749648
DT-PCR-45-05	#N/A		SRP488305	PRJNA1072715	SRR27878255	SAMN39749649	A1	A1	PCR	45C	DT	A		DT-PCR-45-05_S62_L001_R1_001.fastq.gz	DT-PCR-45-05				A01	A1	PCR	DT	45C	A	5	FLD0197	TTAGTGGTGA	A	2.5	38119	38037	35621	none	35621	0	0	0	DT-PCR-45-05_S62_L001_R1_001.fastq.gz	SRP488285	PRJNA1072695	SRR27878255	SAMN39749649
DT-PCR-45-06	#N/A		SRP488306	PRJNA1072716	SRR27878254	SAMN39749650	A1	A1	PCR	45C	DT	A		DT-PCR-45-06_S63_L001_R1_001.fastq.gz	DT-PCR-45-06				A01	A1	PCR	DT	45C	A	6	FLD0198	GTGAAGGTAA	A	2.5	34054	33975	31745	none	31745	0	0	0	DT-PCR-45-06_S63_L001_R1_001.fastq.gz	SRP488285	PRJNA1072695	SRR27878254	SAMN39749650
DT-PCR-45-07	#N/A		SRP488307	PRJNA1072717	SRR27878253	SAMN39749651	A1	A1	PCR	45C	DT	A		DT-PCR-45-07_S64_L001_R1_001.fastq.gz	DT-PCR-45-07				A01	A1	PCR	DT	45C	A	7	FLD0199	TGTTGTGGTA	A	2.5	34455	34388	32066	none	32066	0	0	0	DT-PCR-45-07_S64_L001_R1_001.fastq.gz	SRP488285	PRJNA1072695	SRR27878253	SAMN39749651
DT-PCR-45-08	#N/A		SRP488308	PRJNA1072718	SRR27878252	SAMN39749652	A1	A1	PCR	45C	DT	A		DT-PCR-45-08_S65_L001_R1_001.fastq.gz	DT-PCR-45-08				A01	A1	PCR	DT	45C	A	8	FLD0200	GTTGATGAGT	A	2.5	35883	35804	33278	none	33278	0	0	0	DT-PCR-45-08_S65_L001_R1_001.fastq.gz	SRP488285	PRJNA1072695	SRR27878252	SAMN39749652
DT-PCR-55-01	#N/A		SRP488309	PRJNA1072719	SRR27878251	SAMN39749653	A1	A1	PCR	55C	DT	A		DT-PCR-55-01_S66_L001_R1_001.fastq.gz	DT-PCR-55-01				A01	A1	PCR	DT	55C	A	1	FLD0201	GGTCAGTGTA	A	2.5	40051	39992	37331	none	37331	0	0	0	DT-PCR-55-01_S66_L001_R1_001.fastq.gz	SRP488285	PRJNA1072695	SRR27878251	SAMN39749653
DT-PCR-55-02	#N/A		SRP488310	PRJNA1072720	SRR27878250	SAMN39749654	A1	A1	PCR	55C	DT	A		DT-PCR-55-02_S67_L001_R1_001.fastq.gz	DT-PCR-55-02				A01	A1	PCR	DT	55C	A	2	FLD0202	GTAATGGAGT	A	2.5	35247	35151	32764	none	32764	0	0	0	DT-PCR-55-02_S67_L001_R1_001.fastq.gz	SRP488285	PRJNA1072695	SRR27878250	SAMN39749654
DT-PCR-55-03	#N/A		SRP488311	PRJNA1072721	SRR27878249	SAMN39749655	A1	A1	PCR	55C	DT	A		DT-PCR-55-03_S68_L001_R1_001.fastq.gz	DT-PCR-55-03				A01	A1	PCR	DT	55C	A	3	FLD0203	CTCGTTATTC	A	2.5	35098	34986	32553	none	32553	0	0	0	DT-PCR-55-03_S68_L001_R1_001.fastq.gz	SRP488285	PRJNA1072695	SRR27878249	SAMN39749655
DT-PCR-55-04	#N/A		SRP488312	PRJNA1072722	SRR27878248	SAMN39749656	A1	A1	PCR	55C	DT	A		DT-PCR-55-04_S69_L001_R1_001.fastq.gz	DT-PCR-55-04				A01	A1	PCR	DT	55C	A	4	FLD0204	GGAAGTAAGG	A	2.5	35569	35485	33088	none	33088	0	0	0	DT-PCR-55-04_S69_L001_R1_001.fastq.gz	SRP488285	PRJNA1072695	SRR27878248	SAMN39749656
DT-PCR-55-05	#N/A		SRP488313	PRJNA1072723	SRR27878247	SAMN39749657	A1	A1	PCR	55C	DT	A		DT-PCR-55-05_S70_L001_R1_001.fastq.gz	DT-PCR-55-05				A01	A1	PCR	DT	55C	A	5	FLD0205	CGGTGTGTGT	A	2.5	34242	34171	31797	none	31797	0	0	0	DT-PCR-55-05_S70_L001_R1_001.fastq.gz	SRP488285	PRJNA1072695	SRR27878247	SAMN39749657
DT-PCR-55-06	#N/A		SRP488314	PRJNA1072724	SRR27878246	SAMN39749658	A1	A1	PCR	55C	DT	A		DT-PCR-55-06_S71_L001_R1_001.fastq.gz	DT-PCR-55-06				A01	A1	PCR	DT	55C	A	6	FLD0206	CGTCTTCTTA	A	2.5	30517	30438	28319	none	28319	0	0	0	DT-PCR-55-06_S71_L001_R1_001.fastq.gz	SRP488285	PRJNA1072695	SRR27878246	SAMN39749658
DT-PCR-55-07	#N/A		SRP488315	PRJNA1072725	SRR27878244	SAMN39749659	A1	A1	PCR	55C	DT	A		DT-PCR-55-07_S72_L001_R1_001.fastq.gz	DT-PCR-55-07				A01	A1	PCR	DT	55C	A	7	FLD0207	TGTGAATCTC	A	2.5	24910	24861	23157	none	23157	0	0	0	DT-PCR-55-07_S72_L001_R1_001.fastq.gz	SRP488285	PRJNA1072695	SRR27878244	SAMN39749659
DT-PCR-55-08	#N/A		SRP488316	PRJNA1072726	SRR27878243	SAMN39749660	A1	A1	PCR	55C	DT	A		DT-PCR-55-08_S73_L001_R1_001.fastq.gz	DT-PCR-55-08				A01	A1	PCR	DT	55C	A	8	FLD0208	CTAATCGTGT	A	2.5	27326	27268	25335	none	25335	0	0	0	DT-PCR-55-08_S73_L001_R1_001.fastq.gz	SRP488285	PRJNA1072695	SRR27878243	SAMN39749660
QB-DePCR-45-01	#N/A		SRP488317	PRJNA1072727	SRR27878242	SAMN39749661	A1	A1	DePCR	45C	QB	A		QB-DePCR-45-01_S134_L001_R1_001.fastq.gz	QB-DePCR-45-01				A01	A1	DePCR	QB	45C	A	1	FLD0017	TGAGCGTGCT	A	2.5	20782	20651	18846	none	18846	0	0	0	QB-DePCR-45-01_S134_L001_R1_001.fastq.gz	SRP488285	PRJNA1072695	SRR27878242	SAMN39749661
QB-DePCR-45-02	#N/A		SRP488318	PRJNA1072728	SRR27878241	SAMN39749662	A1	A1	DePCR	45C	QB	A		QB-DePCR-45-02_S135_L001_R1_001.fastq.gz	QB-DePCR-45-02				A01	A1	DePCR	QB	45C	A	2	FLD0018	CATGTCGTCA	A	2.5	18128	18030	16433	none	16433	0	0	0	QB-DePCR-45-02_S135_L001_R1_001.fastq.gz	SRP488285	PRJNA1072695	SRR27878241	SAMN39749662
QB-DePCR-45-03	#N/A		SRP488319	PRJNA1072729	SRR27878240	SAMN39749663	A1	A1	DePCR	45C	QB	A		QB-DePCR-45-03_S136_L001_R1_001.fastq.gz	QB-DePCR-45-03				A01	A1	DePCR	QB	45C	A	3	FLD0019	TCAGTGTCTC	A	2.5	8005	7948	7119	none	7119	0	0	0	QB-DePCR-45-03_S136_L001_R1_001.fastq.gz	SRP488285	PRJNA1072695	SRR27878240	SAMN39749663
QB-DePCR-45-04	#N/A		SRP488320	PRJNA1072730	SRR27878239	SAMN39749664	A1	A1	DePCR	45C	QB	A		QB-DePCR-45-04_S137_L001_R1_001.fastq.gz	QB-DePCR-45-04				A01	A1	DePCR	QB	45C	A	4	FLD0020	GTGCTCATGT	A	2.5	17922	17830	16290	none	16290	0	0	0	QB-DePCR-45-04_S137_L001_R1_001.fastq.gz	SRP488285	PRJNA1072695	SRR27878239	SAMN39749664
QB-DePCR-45-05	#N/A		SRP488321	PRJNA1072731	SRR27878238	SAMN39749665	A1	A1	DePCR	45C	QB	A		QB-DePCR-45-05_S138_L001_R1_001.fastq.gz	QB-DePCR-45-05				A01	A1	DePCR	QB	45C	A	5	FLD0021	CGTATCTCGA	A	2.5	19518	19397	17809	none	17809	0	0	0	QB-DePCR-45-05_S138_L001_R1_001.fastq.gz	SRP488285	PRJNA1072695	SRR27878238	SAMN39749665
QB-DePCR-45-06	#N/A		SRP488322	PRJNA1072732	SRR27878237	SAMN39749666	A1	A1	DePCR	45C	QB	A		QB-DePCR-45-06_S139_L001_R1_001.fastq.gz	QB-DePCR-45-06				A01	A1	DePCR	QB	45C	A	6	FLD0022	GTCATGCGTC	A	2.5	16469	16369	14852	none	14852	0	0	0	QB-DePCR-45-06_S139_L001_R1_001.fastq.gz	SRP488285	PRJNA1072695	SRR27878237	SAMN39749666
QB-DePCR-45-07	#N/A		SRP488323	PRJNA1072733	SRR27878236	SAMN39749667	A1	A1	DePCR	45C	QB	A		QB-DePCR-45-07_S140_L001_R1_001.fastq.gz	QB-DePCR-45-07				A01	A1	DePCR	QB	45C	A	7	FLD0023	CTATGCGATC	A	2.5	16896	16791	15271	none	15271	0	0	0	QB-DePCR-45-07_S140_L001_R1_001.fastq.gz	SRP488285	PRJNA1072695	SRR27878236	SAMN39749667
QB-DePCR-45-08	#N/A		SRP488324	PRJNA1072734	SRR27878235	SAMN39749668	A1	A1	DePCR	45C	QB	A		QB-DePCR-45-08_S141_L001_R1_001.fastq.gz	QB-DePCR-45-08				A01	A1	DePCR	QB	45C	A	8	FLD0024	TGCTATGCTG	A	2.5	8032	7970	7126	none	7126	0	0	0	QB-DePCR-45-08_S141_L001_R1_001.fastq.gz	SRP488285	PRJNA1072695	SRR27878235	SAMN39749668
QB-DePCR-55-01	#N/A		SRP488325	PRJNA1072735	SRR27878233	SAMN39749669	A1	A1	DePCR	55C	QB	A		QB-DePCR-55-01_S142_L001_R1_001.fastq.gz	QB-DePCR-55-01				A01	A1	DePCR	QB	55C	A	1	FLD0025	TGTGTGCATG	A	2.5	44837	44570	41411	none	41411	0	0	0	QB-DePCR-55-01_S142_L001_R1_001.fastq.gz	SRP488285	PRJNA1072695	SRR27878233	SAMN39749669
QB-DePCR-55-02	#N/A		SRP488326	PRJNA1072736	SRR27878232	SAMN39749670	A1	A1	DePCR	55C	QB	A		QB-DePCR-55-02_S143_L001_R1_001.fastq.gz	QB-DePCR-55-02				A01	A1	DePCR	QB	55C	A	2	FLD0026	GAGTGTCACT	A	2.5	46553	46303	43018	none	43018	0	0	0	QB-DePCR-55-02_S143_L001_R1_001.fastq.gz	SRP488285	PRJNA1072695	SRR27878232	SAMN39749670
QB-DePCR-55-03	#N/A		SRP488327	PRJNA1072737	SRR27878231	SAMN39749671	A1	A1	DePCR	55C	QB	A		QB-DePCR-55-03_S144_L001_R1_001.fastq.gz	QB-DePCR-55-03				A01	A1	DePCR	QB	55C	A	3	FLD0027	CTAGTCTCGT	A	2.5	47165	46877	43586	none	43586	0	0	0	QB-DePCR-55-03_S144_L001_R1_001.fastq.gz	SRP488285	PRJNA1072695	SRR27878231	SAMN39749671
QB-DePCR-55-04	#N/A		SRP488328	PRJNA1072738	SRR27878230	SAMN39749672	A1	A1	DePCR	55C	QB	A		QB-DePCR-55-04_S145_L001_R1_001.fastq.gz	QB-DePCR-55-04				A01	A1	DePCR	QB	55C	A	4	FLD0028	GAGTGCATCT	A	2.5	46978	46719	43451	none	43451	0	0	0	QB-DePCR-55-04_S145_L001_R1_001.fastq.gz	SRP488285	PRJNA1072695	SRR27878230	SAMN39749672
QB-DePCR-55-05	#N/A		SRP488329	PRJNA1072739	SRR27878229	SAMN39749673	A1	A1	DePCR	55C	QB	A		QB-DePCR-55-05_S146_L001_R1_001.fastq.gz	QB-DePCR-55-05				A01	A1	DePCR	QB	55C	A	5	FLD0029	TGCGTAGTCG	A	2.5	44782	44516	41306	none	41306	0	0	0	QB-DePCR-55-05_S146_L001_R1_001.fastq.gz	SRP488285	PRJNA1072695	SRR27878229	SAMN39749673
QB-DePCR-55-06	#N/A		SRP488330	PRJNA1072740	SRR27878228	SAMN39749674	A1	A1	DePCR	55C	QB	A		QB-DePCR-55-06_S147_L001_R1_001.fastq.gz	QB-DePCR-55-06				A01	A1	DePCR	QB	55C	A	6	FLD0030	CTGTGTCGTC	A	2.5	46480	46175	42928	none	42928	0	0	0	QB-DePCR-55-06_S147_L001_R1_001.fastq.gz	SRP488285	PRJNA1072695	SRR27878228	SAMN39749674
QB-DePCR-55-07	#N/A		SRP488331	PRJNA1072741	SRR27878227	SAMN39749675	A1	A1	DePCR	55C	QB	A		QB-DePCR-55-07_S148_L001_R1_001.fastq.gz	QB-DePCR-55-07				A01	A1	DePCR	QB	55C	A	7	FLD0031	CTGTAGTGCG	A	2.5	38200	37969	35245	none	35245	0	0	0	QB-DePCR-55-07_S148_L001_R1_001.fastq.gz	SRP488285	PRJNA1072695	SRR27878227	SAMN39749675
QB-DePCR-55-08	#N/A		SRP488332	PRJNA1072742	SRR27878226	SAMN39749676	A1	A1	DePCR	55C	QB	A		QB-DePCR-55-08_S149_L001_R1_001.fastq.gz	QB-DePCR-55-08				A01	A1	DePCR	QB	55C	A	8	FLD0032	GTGCGCTAGT	A	2.5	44519	44265	41049	none	41049	0	0	0	QB-DePCR-55-08_S149_L001_R1_001.fastq.gz	SRP488285	PRJNA1072695	SRR27878226	SAMN39749676
QB-PCR-45-01	#N/A		SRP488333	PRJNA1072743	SRR27878225	SAMN39749677	A1	A1	PCR	45C	QB	A		QB-PCR-45-01_S74_L001_R1_001.fastq.gz	QB-PCR-45-01				A01	A1	PCR	QB	45C	A	1	FLD0209	CTCTTAGTTC	A	2.5	57156	57056	55411	none	55411	0	0	0	QB-PCR-45-01_S74_L001_R1_001.fastq.gz	SRP488285	PRJNA1072695	SRR27878225	SAMN39749677
QB-PCR-45-02	#N/A		SRP488334	PRJNA1072744	SRR27878224	SAMN39749678	A1	A1	PCR	45C	QB	A		QB-PCR-45-02_S75_L001_R1_001.fastq.gz	QB-PCR-45-02				A01	A1	PCR	QB	45C	A	2	FLD0210	GGATAGGATC	A	2.5	46071	45953	44537	none	44537	0	0	0	QB-PCR-45-02_S75_L001_R1_001.fastq.gz	SRP488285	PRJNA1072695	SRR27878224	SAMN39749678
QB-PCR-45-03	#N/A		SRP488335	PRJNA1072745	SRR27878222	SAMN39749679	A1	A1	PCR	45C	QB	A		QB-PCR-45-03_S76_L001_R1_001.fastq.gz	QB-PCR-45-03				A01	A1	PCR	QB	45C	A	3	FLD0211	GGTGTCTTGT	A	2.5	64155	63980	62203	none	62203	0	0	0	QB-PCR-45-03_S76_L001_R1_001.fastq.gz	SRP488285	PRJNA1072695	SRR27878222	SAMN39749679
QB-PCR-45-04	#N/A		SRP488336	PRJNA1072746	SRR27878221	SAMN39749680	A1	A1	PCR	45C	QB	A		QB-PCR-45-04_S77_L001_R1_001.fastq.gz	QB-PCR-45-04				A01	A1	PCR	QB	45C	A	4	FLD0212	GATGGTTGTA	A	2.5	54073	53971	52354	none	52354	0	0	0	QB-PCR-45-04_S77_L001_R1_001.fastq.gz	SRP488285	PRJNA1072695	SRR27878221	SAMN39749680
QB-PCR-45-05	#N/A		SRP488337	PRJNA1072747	SRR27878220	SAMN39749681	A1	A1	PCR	45C	QB	A		QB-PCR-45-05_S78_L001_R1_001.fastq.gz	QB-PCR-45-05				A01	A1	PCR	QB	45C	A	5	FLD0213	CCTCGTTGTT	A	2.5	43895	43746	42358	none	42358	0	0	0	QB-PCR-45-05_S78_L001_R1_001.fastq.gz	SRP488285	PRJNA1072695	SRR27878220	SAMN39749681
QB-PCR-45-06	#N/A		SRP488338	PRJNA1072748	SRR27878219	SAMN39749682	A1	A1	PCR	45C	QB	A		QB-PCR-45-06_S79_L001_R1_001.fastq.gz	QB-PCR-45-06				A01	A1	PCR	QB	45C	A	6	FLD0214	GGTTGGAGTT	A	2.5	36587	36505	35282	none	35282	0	0	0	QB-PCR-45-06_S79_L001_R1_001.fastq.gz	SRP488285	PRJNA1072695	SRR27878219	SAMN39749682
QB-PCR-45-07	#N/A		SRP488339	PRJNA1072749	SRR27878218	SAMN39749683	A1	A1	PCR	45C	QB	A		QB-PCR-45-07_S80_L001_R1_001.fastq.gz	QB-PCR-45-07				A01	A1	PCR	QB	45C	A	7	FLD0215	TGGTGTCCGT	A	2.5	36108	35997	34906	none	34906	0	0	0	QB-PCR-45-07_S80_L001_R1_001.fastq.gz	SRP488285	PRJNA1072695	SRR27878218	SAMN39749683
QB-PCR-45-08	#N/A		SRP488340	PRJNA1072750	SRR27878217	SAMN39749684	A1	A1	PCR	45C	QB	A		QB-PCR-45-08_S81_L001_R1_001.fastq.gz	QB-PCR-45-08				A01	A1	PCR	QB	45C	A	8	FLD0216	CGTTAGCGTA	A	2.5	11950	11908	11376	none	11376	0	0	0	QB-PCR-45-08_S81_L001_R1_001.fastq.gz	SRP488285	PRJNA1072695	SRR27878217	SAMN39749684
QB-PCR-55-01	#N/A		SRP488341	PRJNA1072751	SRR27878216	SAMN39749685	A1	A1	PCR	55C	QB	A		QB-PCR-55-01_S82_L001_R1_001.fastq.gz	QB-PCR-55-01				A01	A1	PCR	QB	55C	A	1	FLD0217	TACTAGGATC	A	2.5	51928	51802	50369	none	50369	0	0	0	QB-PCR-55-01_S82_L001_R1_001.fastq.gz	SRP488285	PRJNA1072695	SRR27878216	SAMN39749685
QB-PCR-55-02	#N/A		SRP488342	PRJNA1072752	SRR27878215	SAMN39749686	A1	A1	PCR	55C	QB	A		QB-PCR-55-02_S83_L001_R1_001.fastq.gz	QB-PCR-55-02				A01	A1	PCR	QB	55C	A	2	FLD0218	GTCTCAATGT	A	2.5	53566	53473	51928	none	51928	0	0	0	QB-PCR-55-02_S83_L001_R1_001.fastq.gz	SRP488285	PRJNA1072695	SRR27878215	SAMN39749686
QB-PCR-55-03	#N/A		SRP488343	PRJNA1072753	SRR27878214	SAMN39749687	A1	A1	PCR	55C	QB	A		QB-PCR-55-03_S84_L001_R1_001.fastq.gz	QB-PCR-55-03				A01	A1	PCR	QB	55C	A	3	FLD0219	GATGAGGTAT	A	2.5	54463	54325	52779	none	52779	0	0	0	QB-PCR-55-03_S84_L001_R1_001.fastq.gz	SRP488285	PRJNA1072695	SRR27878214	SAMN39749687
QB-PCR-55-04	#N/A		SRP488344	PRJNA1072754	SRR27878213	SAMN39749688	A1	A1	PCR	55C	QB	A		QB-PCR-55-04_S85_L001_R1_001.fastq.gz	QB-PCR-55-04				A01	A1	PCR	QB	55C	A	4	FLD0220	GGTGTTAGTG	A	2.5	64397	64268	62422	none	62422	0	0	0	QB-PCR-55-04_S85_L001_R1_001.fastq.gz	SRP488285	PRJNA1072695	SRR27878213	SAMN39749688
QB-PCR-55-05	#N/A		SRP488345	PRJNA1072755	SRR27878211	SAMN39749689	A1	A1	PCR	55C	QB	A		QB-PCR-55-05_S86_L001_R1_001.fastq.gz	QB-PCR-55-05				A01	A1	PCR	QB	55C	A	5	FLD0221	CATTCTCTGA	A	2.5	66848	66712	64761	none	64761	0	0	0	QB-PCR-55-05_S86_L001_R1_001.fastq.gz	SRP488285	PRJNA1072695	SRR27878211	SAMN39749689
QB-PCR-55-06	#N/A		SRP488346	PRJNA1072756	SRR27878210	SAMN39749690	A1	A1	PCR	55C	QB	A		QB-PCR-55-06_S87_L001_R1_001.fastq.gz	QB-PCR-55-06				A01	A1	PCR	QB	55C	A	6	FLD0222	CATCTGGAGT	A	2.5	49213	49084	47707	none	47707	0	0	0	QB-PCR-55-06_S87_L001_R1_001.fastq.gz	SRP488285	PRJNA1072695	SRR27878210	SAMN39749690
QB-PCR-55-07	#N/A		SRP488347	PRJNA1072757	SRR27878209	SAMN39749691	A1	A1	PCR	55C	QB	A		QB-PCR-55-07_S88_L001_R1_001.fastq.gz	QB-PCR-55-07				A01	A1	PCR	QB	55C	A	7	FLD0223	GAATGGAAGA	A	2.5	54623	54466	52791	none	52791	0	0	0	QB-PCR-55-07_S88_L001_R1_001.fastq.gz	SRP488285	PRJNA1072695	SRR27878209	SAMN39749691
QB-PCR-55-08	#N/A		SRP488348	PRJNA1072758	SRR27878208	SAMN39749692	A1	A1	PCR	55C	QB	A		QB-PCR-55-08_S89_L001_R1_001.fastq.gz	QB-PCR-55-08				A01	A1	PCR	QB	55C	A	8	FLD0224	GGCTGTGATC	A	2.5	21	21	19	none	19	0	0	0	QB-PCR-55-08_S89_L001_R1_001.fastq.gz	SRP488285	PRJNA1072695	SRR27878208	SAMN39749692
v1-v0-45C-01	#N/A		SRP488349	PRJNA1072759	SRR27878207	SAMN39749693	v1-v0	VW	DePCR	45C	QB	AP		v1-v0-45C-01_S1_L001_R1_001.fastq.gz	v1-v0-45C-01				VW	v1-v0	DePCR	QB	45C	AP	1	FLD0193	TTGTTGCTGT	A	2.5	2423	2391	2048	none	2048	0	0	0	v1-v0-45C-01_S1_L001_R1_001.fastq.gz	SRP488285	PRJNA1072695	SRR27878207	SAMN39749693
v1-v0-45C-02	#N/A		SRP488350	PRJNA1072760	SRR27878206	SAMN39749694	v1-v0	VW	DePCR	45C	QB	AP		v1-v0-45C-02_S2_L001_R1_001.fastq.gz	v1-v0-45C-02				VW	v1-v0	DePCR	QB	45C	AP	2	FLD0194	GTGTGGTTGT	A	2.5	3401	3342	2328	none	2328	0	0	0	v1-v0-45C-02_S2_L001_R1_001.fastq.gz	SRP488285	PRJNA1072695	SRR27878206	SAMN39749694
v1-v0-45C-03	#N/A		SRP488351	PRJNA1072761	SRR27878205	SAMN39749695	v1-v0	VW	DePCR	45C	QB	AP		v1-v0-45C-03_S3_L001_R1_001.fastq.gz	v1-v0-45C-03				VW	v1-v0	DePCR	QB	45C	AP	3	FLD0195	TAGGTGGAAT	A	2.5	2526	2511	2167	none	2167	0	0	0	v1-v0-45C-03_S3_L001_R1_001.fastq.gz	SRP488285	PRJNA1072695	SRR27878205	SAMN39749695
v1-v0-45C-04	#N/A		SRP488352	PRJNA1072762	SRR27878204	SAMN39749696	v1-v0	VW	DePCR	45C	QB	AP		v1-v0-45C-04_S4_L001_R1_001.fastq.gz	v1-v0-45C-04				VW	v1-v0	DePCR	QB	45C	AP	4	FLD0196	TGTAGGTGGA	A	2.5	2375	2358	2065	none	2065	0	0	0	v1-v0-45C-04_S4_L001_R1_001.fastq.gz	SRP488285	PRJNA1072695	SRR27878204	SAMN39749696
v1-v0-55C-01	#N/A		SRP488353	PRJNA1072763	SRR27878203	SAMN39749697	v1-v0	VW	DePCR	55C	QB	AP		v1-v0-55C-01_S5_L001_R1_001.fastq.gz	v1-v0-55C-01				VW	v1-v0	DePCR	QB	55C	AP	1	FLD0197	TTAGTGGTGA	A	2.5	17798	17689	16500	none	16500	0	0	0	v1-v0-55C-01_S5_L001_R1_001.fastq.gz	SRP488285	PRJNA1072695	SRR27878203	SAMN39749697
v1-v0-55C-02	#N/A		SRP488354	PRJNA1072764	SRR27878202	SAMN39749698	v1-v0	VW	DePCR	55C	QB	AP		v1-v0-55C-02_S6_L001_R1_001.fastq.gz	v1-v0-55C-02				VW	v1-v0	DePCR	QB	55C	AP	2	FLD0198	GTGAAGGTAA	A	2.5	14559	14466	13263	none	13263	0	0	0	v1-v0-55C-02_S6_L001_R1_001.fastq.gz	SRP488285	PRJNA1072695	SRR27878202	SAMN39749698
v1-v0-55C-03	#N/A		SRP488355	PRJNA1072765	SRR27878200	SAMN39749699	v1-v0	VW	DePCR	55C	QB	AP		v1-v0-55C-03_S7_L001_R1_001.fastq.gz	v1-v0-55C-03				VW	v1-v0	DePCR	QB	55C	AP	3	FLD0199	TGTTGTGGTA	A	2.5	18529	18416	17125	none	17125	0	0	0	v1-v0-55C-03_S7_L001_R1_001.fastq.gz	SRP488285	PRJNA1072695	SRR27878200	SAMN39749699
v1-v0-55C-04	#N/A		SRP488356	PRJNA1072766	SRR27878199	SAMN39749700	v1-v0	VW	DePCR	55C	QB	AP		v1-v0-55C-04_S8_L001_R1_001.fastq.gz	v1-v0-55C-04				VW	v1-v0	DePCR	QB	55C	AP	4	FLD0200	GTTGATGAGT	A	2.5	16012	15889	14708	none	14708	0	0	0	v1-v0-55C-04_S8_L001_R1_001.fastq.gz	SRP488285	PRJNA1072695	SRR27878199	SAMN39749700
v1-v11-45C-01	#N/A		SRP488357	PRJNA1072767	SRR27878198	SAMN39749701	v1-v11	V4	DePCR	45C	QB	AP		v1-v11-45C-01_S49_L001_R1_001.fastq.gz	v1-v11-45C-01				V4	v1-v11	DePCR	QB	45C	AP	1	FLD0201	GGTCAGTGTA	A	2.5	2441	2419	2023	none	2023	0.666909	0	22.807	v1-v11-45C-01_S49_L001_R1_001.fastq.gz	SRP488285	PRJNA1072695	SRR27878198	SAMN39749701
v1-v11-45C-02	#N/A		SRP488358	PRJNA1072768	SRR27878197	SAMN39749702	v1-v11	V4	DePCR	45C	QB	AP		v1-v11-45C-02_S50_L001_R1_001.fastq.gz	v1-v11-45C-02				V4	v1-v11	DePCR	QB	45C	AP	2	FLD0202	GTAATGGAGT	A	2.5	1319	1306	1047	none	1047	0.672542	0	20.2301	v1-v11-45C-02_S50_L001_R1_001.fastq.gz	SRP488285	PRJNA1072695	SRR27878197	SAMN39749702
v1-v11-45C-03	#N/A		SRP488359	PRJNA1072769	SRR27878196	SAMN39749703	v1-v11	V4	DePCR	45C	QB	AP		v1-v11-45C-03_S51_L001_R1_001.fastq.gz	v1-v11-45C-03				V4	v1-v11	DePCR	QB	45C	AP	3	FLD0203	CTCGTTATTC	A	2.5	1117	1112	865	none	865	0.666738	0	22.8804	v1-v11-45C-03_S51_L001_R1_001.fastq.gz	SRP488285	PRJNA1072695	SRR27878196	SAMN39749703
v1-v11-45C-04	#N/A		SRP488360	PRJNA1072770	SRR27878195	SAMN39749704	v1-v11	V4	DePCR	45C	QB	AP		v1-v11-45C-04_S52_L001_R1_001.fastq.gz	v1-v11-45C-04				V4	v1-v11	DePCR	QB	45C	AP	4	FLD0204	GGAAGTAAGG	A	2.5	757	752	593	none	593	0.663783	0	24.1147	v1-v11-45C-04_S52_L001_R1_001.fastq.gz	SRP488285	PRJNA1072695	SRR27878195	SAMN39749704
v1-v11-55C-01	#N/A		SRP488361	PRJNA1072771	SRR27878194	SAMN39749705	v1-v11	V4	DePCR	55C	QB	AP		v1-v11-55C-01_S53_L001_R1_001.fastq.gz	v1-v11-55C-01				V4	v1-v11	DePCR	QB	55C	AP	1	FLD0205	CGGTGTGTGT	A	2.5	13683	13577	12407	none	12407	0.375552	0	75.125	v1-v11-55C-01_S53_L001_R1_001.fastq.gz	SRP488285	PRJNA1072695	SRR27878194	SAMN39749705
v1-v11-55C-02	#N/A		SRP488362	PRJNA1072772	SRR27878312	SAMN39749706	v1-v11	V4	DePCR	55C	QB	AP		v1-v11-55C-02_S54_L001_R1_001.fastq.gz	v1-v11-55C-02				V4	v1-v11	DePCR	QB	55C	AP	2	FLD0206	CGTCTTCTTA	A	2.5	15194	15068	13860	none	13860	0.36672	0	76.0206	v1-v11-55C-02_S54_L001_R1_001.fastq.gz	SRP488285	PRJNA1072695	SRR27878312	SAMN39749706
v1-v11-55C-03	#N/A		SRP488363	PRJNA1072773	SRR27878311	SAMN39749707	v1-v11	V4	DePCR	55C	QB	AP		v1-v11-55C-03_S55_L001_R1_001.fastq.gz	v1-v11-55C-03				V4	v1-v11	DePCR	QB	55C	AP	3	FLD0207	TGTGAATCTC	A	2.5	14837	14730	13528	none	13528	0.382676	0	74.3887	v1-v11-55C-03_S55_L001_R1_001.fastq.gz	SRP488285	PRJNA1072695	SRR27878311	SAMN39749707
v1-v11-55C-04	#N/A		SRP488364	PRJNA1072774	SRR27878310	SAMN39749708	v1-v11	V4	DePCR	55C	QB	AP		v1-v11-55C-04_S56_L001_R1_001.fastq.gz	v1-v11-55C-04				V4	v1-v11	DePCR	QB	55C	AP	4	FLD0208	CTAATCGTGT	A	2.5	12060	11963	10927	none	10927	0.384112	0	74.2386	v1-v11-55C-04_S56_L001_R1_001.fastq.gz	SRP488285	PRJNA1072695	SRR27878310	SAMN39749708
v1-v1-45C-01	#N/A		SRP488365	PRJNA1072775	SRR27878308	SAMN39749709	v1-v1	V0	DePCR	45C	QB	AP		v1-v1-45C-01_S9_L001_R1_001.fastq.gz	v1-v1-45C-01				V0	v1-v1	DePCR	QB	45C	AP	1	FLD0209	CTCTTAGTTC	A	2.5	1550	1542	1328	none	1328	0	0	0	v1-v1-45C-01_S9_L001_R1_001.fastq.gz	SRP488285	PRJNA1072695	SRR27878308	SAMN39749709
v1-v1-45C-02	#N/A		SRP488366	PRJNA1072776	SRR27878307	SAMN39749710	v1-v1	V0	DePCR	45C	QB	AP		v1-v1-45C-02_S10_L001_R1_001.fastq.gz	v1-v1-45C-02				V0	v1-v1	DePCR	QB	45C	AP	2	FLD0210	GGATAGGATC	A	2.5	1631	1617	1388	none	1388	0	0	0	v1-v1-45C-02_S10_L001_R1_001.fastq.gz	SRP488285	PRJNA1072695	SRR27878307	SAMN39749710
v1-v1-45C-03	#N/A		SRP488367	PRJNA1072777	SRR27878306	SAMN39749711	v1-v1	V0	DePCR	45C	QB	AP		v1-v1-45C-03_S11_L001_R1_001.fastq.gz	v1-v1-45C-03				V0	v1-v1	DePCR	QB	45C	AP	3	FLD0211	GGTGTCTTGT	A	2.5	1372	1359	1153	none	1153	0	0	0	v1-v1-45C-03_S11_L001_R1_001.fastq.gz	SRP488285	PRJNA1072695	SRR27878306	SAMN39749711
v1-v1-45C-04	#N/A		SRP488368	PRJNA1072778	SRR27878305	SAMN39749712	v1-v1	V0	DePCR	45C	QB	AP		v1-v1-45C-04_S12_L001_R1_001.fastq.gz	v1-v1-45C-04				V0	v1-v1	DePCR	QB	45C	AP	4	FLD0212	GATGGTTGTA	A	2.5	1490	1478	1261	none	1261	0	0	0	v1-v1-45C-04_S12_L001_R1_001.fastq.gz	SRP488285	PRJNA1072695	SRR27878305	SAMN39749712
v1-v15-45C-01	#N/A		SRP488369	PRJNA1072779	SRR27878304	SAMN39749713	v1-v15	V6	DePCR	45C	QB	AP		v1-v15-45C-01_S57_L001_R1_001.fastq.gz	v1-v15-45C-01				V6	v1-v15	DePCR	QB	45C	AP	1	FLD0213	CCTCGTTGTT	A	2.5	1220	1210	927	none	927	0.684703	0	12.9771	v1-v15-45C-01_S57_L001_R1_001.fastq.gz	SRP488285	PRJNA1072695	SRR27878304	SAMN39749713
v1-v15-45C-02	#N/A		SRP488370	PRJNA1072780	SRR27878303	SAMN39749714	v1-v15	V6	DePCR	45C	QB	AP		v1-v15-45C-02_S58_L001_R1_001.fastq.gz	v1-v15-45C-02				V6	v1-v15	DePCR	QB	45C	AP	2	FLD0214	GGTTGGAGTT	A	2.5	2071	2049	1684	none	1684	0.681345	0	15.3337	v1-v15-45C-02_S58_L001_R1_001.fastq.gz	SRP488285	PRJNA1072695	SRR27878303	SAMN39749714
v1-v15-45C-03	#N/A		SRP488371	PRJNA1072781	SRR27878302	SAMN39749715	v1-v15	V6	DePCR	45C	QB	AP		v1-v15-45C-03_S59_L001_R1_001.fastq.gz	v1-v15-45C-03				V6	v1-v15	DePCR	QB	45C	AP	3	FLD0215	TGGTGTCCGT	A	2.5	1857	1830	1496	none	1496	0.681347	0	15.3324	v1-v15-45C-03_S59_L001_R1_001.fastq.gz	SRP488285	PRJNA1072695	SRR27878302	SAMN39749715
v1-v15-45C-04	#N/A		SRP488372	PRJNA1072782	SRR27878301	SAMN39749716	v1-v15	V6	DePCR	45C	QB	AP		v1-v15-45C-04_S60_L001_R1_001.fastq.gz	v1-v15-45C-04				V6	v1-v15	DePCR	QB	45C	AP	4	FLD0216	CGTTAGCGTA	A	2.5	1712	1698	1387	none	1387	0.671679	0	20.6466	v1-v15-45C-04_S60_L001_R1_001.fastq.gz	SRP488285	PRJNA1072695	SRR27878301	SAMN39749716
v1-v15-55C-01	#N/A		SRP488373	PRJNA1072783	SRR27878300	SAMN39749717	v1-v15	V6	DePCR	55C	QB	AP		v1-v15-55C-01_S61_L001_R1_001.fastq.gz	v1-v15-55C-01				V6	v1-v15	DePCR	QB	55C	AP	1	FLD0217	TACTAGGATC	A	2.5	12648	12552	11457	none	11457	0.463678	0	65.0062	v1-v15-55C-01_S61_L001_R1_001.fastq.gz	SRP488285	PRJNA1072695	SRR27878300	SAMN39749717
v1-v15-55C-02	#N/A		SRP488374	PRJNA1072784	SRR27878299	SAMN39749718	v1-v15	V6	DePCR	55C	QB	AP		v1-v15-55C-02_S62_L001_R1_001.fastq.gz	v1-v15-55C-02				V6	v1-v15	DePCR	QB	55C	AP	2	FLD0218	GTCTCAATGT	A	2.5	13369	13269	12102	none	12102	0.462014	0	65.2203	v1-v15-55C-02_S62_L001_R1_001.fastq.gz	SRP488285	PRJNA1072695	SRR27878299	SAMN39749718
v1-v15-55C-03	#N/A		SRP488375	PRJNA1072785	SRR27878297	SAMN39749719	v1-v15	V6	DePCR	55C	QB	AP		v1-v15-55C-03_S63_L001_R1_001.fastq.gz	v1-v15-55C-03				V6	v1-v15	DePCR	QB	55C	AP	3	FLD0219	GATGAGGTAT	A	2.5	12628	12521	11446	none	11446	0.457383	0	65.8108	v1-v15-55C-03_S63_L001_R1_001.fastq.gz	SRP488285	PRJNA1072695	SRR27878297	SAMN39749719
v1-v15-55C-04	#N/A		SRP488376	PRJNA1072786	SRR27878296	SAMN39749720	v1-v15	V6	DePCR	55C	QB	AP		v1-v15-55C-04_S64_L001_R1_001.fastq.gz	v1-v15-55C-04				V6	v1-v15	DePCR	QB	55C	AP	4	FLD0220	GGTGTTAGTG	A	2.5	12511	12417	11297	none	11297	0.458314	0	65.6927	v1-v15-55C-04_S64_L001_R1_001.fastq.gz	SRP488285	PRJNA1072695	SRR27878296	SAMN39749720
v1-v1-55C-01	#N/A		SRP488377	PRJNA1072787	SRR27878295	SAMN39749721	v1-v1	V0	DePCR	55C	QB	AP		v1-v1-55C-01_S13_L001_R1_001.fastq.gz	v1-v1-55C-01				V0	v1-v1	DePCR	QB	55C	AP	1	FLD0221	CATTCTCTGA	A	2.5	12132	12003	11003	none	11003	0	0	0	v1-v1-55C-01_S13_L001_R1_001.fastq.gz	SRP488285	PRJNA1072695	SRR27878295	SAMN39749721
v1-v1-55C-02	#N/A		SRP488378	PRJNA1072788	SRR27878294	SAMN39749722	v1-v1	V0	DePCR	55C	QB	AP		v1-v1-55C-02_S14_L001_R1_001.fastq.gz	v1-v1-55C-02				V0	v1-v1	DePCR	QB	55C	AP	2	FLD0222	CATCTGGAGT	A	2.5	12002	11928	11022	none	11022	0	0	0	v1-v1-55C-02_S14_L001_R1_001.fastq.gz	SRP488285	PRJNA1072695	SRR27878294	SAMN39749722
v1-v1-55C-03	#N/A		SRP488379	PRJNA1072789	SRR27878293	SAMN39749723	v1-v1	V0	DePCR	55C	QB	AP		v1-v1-55C-03_S15_L001_R1_001.fastq.gz	v1-v1-55C-03				V0	v1-v1	DePCR	QB	55C	AP	3	FLD0223	GAATGGAAGA	A	2.5	13817	13726	12752	none	12752	0	0	0	v1-v1-55C-03_S15_L001_R1_001.fastq.gz	SRP488285	PRJNA1072695	SRR27878293	SAMN39749723
v1-v1-55C-04	#N/A		SRP488380	PRJNA1072790	SRR27878292	SAMN39749724	v1-v1	V0	DePCR	55C	QB	AP		v1-v1-55C-04_S16_L001_R1_001.fastq.gz	v1-v1-55C-04				V0	v1-v1	DePCR	QB	55C	AP	4	FLD0224	GGCTGTGATC	A	2.5	12270	12189	11287	none	11287	0	0	0	v1-v1-55C-04_S16_L001_R1_001.fastq.gz	SRP488285	PRJNA1072695	SRR27878292	SAMN39749724
v1-v23-45C-01	#N/A		SRP488381	PRJNA1072791	SRR27878291	SAMN39749725	v1-v23	V2	DePCR	45C	QB	AP		v1-v23-45C-01_S65_L001_R1_001.fastq.gz	v1-v23-45C-01				V2	v1-v23	DePCR	QB	45C	AP	1	FLD0225	TGGTGCTGGA	A	2.5	3678	3651	2327	none	2327	0.664644	0	23.7618	v1-v23-45C-01_S65_L001_R1_001.fastq.gz	SRP488285	PRJNA1072695	SRR27878291	SAMN39749725
v1-v23-45C-02	#N/A		SRP488382	PRJNA1072792	SRR27878290	SAMN39749726	v1-v23	V2	DePCR	45C	QB	AP		v1-v23-45C-02_S66_L001_R1_001.fastq.gz	v1-v23-45C-02				V2	v1-v23	DePCR	QB	45C	AP	2	FLD0226	TATGGTAAGG	A	2.5	2406	2387	1579	none	1579	0.677091	0	17.8718	v1-v23-45C-02_S66_L001_R1_001.fastq.gz	SRP488285	PRJNA1072695	SRR27878290	SAMN39749726
v1-v23-45C-03	#N/A		SRP488383	PRJNA1072793	SRR27878289	SAMN39749727	v1-v23	V2	DePCR	45C	QB	AP		v1-v23-45C-03_S67_L001_R1_001.fastq.gz	v1-v23-45C-03				V2	v1-v23	DePCR	QB	45C	AP	3	FLD0227	GTTCGATTGT	A	2.5	1047	1034	799	none	799	0.66995	0	21.4555	v1-v23-45C-03_S67_L001_R1_001.fastq.gz	SRP488285	PRJNA1072695	SRR27878289	SAMN39749727
v1-v23-45C-04	#N/A		SRP488384	PRJNA1072794	SRR27878287	SAMN39749728	v1-v23	V2	DePCR	45C	QB	AP		v1-v23-45C-04_S68_L001_R1_001.fastq.gz	v1-v23-45C-04				V2	v1-v23	DePCR	QB	45C	AP	4	FLD0228	GGTAGAATGA	A	2.5	2235	2225	1854	none	1854	0.677518	0	17.6341	v1-v23-45C-04_S68_L001_R1_001.fastq.gz	SRP488285	PRJNA1072695	SRR27878287	SAMN39749728
v1-v23-55C-01	#N/A		SRP488385	PRJNA1072795	SRR27878342	SAMN39749729	v1-v23	V2	DePCR	55C	QB	AP		v1-v23-55C-01_S69_L001_R1_001.fastq.gz	v1-v23-55C-01				V2	v1-v23	DePCR	QB	55C	AP	1	FLD0229	TTCTCATCGT	A	2.5	12552	12455	11379	none	11379	0.38708	0	73.927	v1-v23-55C-01_S69_L001_R1_001.fastq.gz	SRP488285	PRJNA1072695	SRR27878342	SAMN39749729
v1-v23-55C-02	#N/A		SRP488386	PRJNA1072796	SRR27878341	SAMN39749730	v1-v23	V2	DePCR	55C	QB	AP		v1-v23-55C-02_S70_L001_R1_001.fastq.gz	v1-v23-55C-02				V2	v1-v23	DePCR	QB	55C	AP	2	FLD0230	CTCAATCGTA	A	2.5	7064	7008	6280	none	6280	0.381781	0	74.4819	v1-v23-55C-02_S70_L001_R1_001.fastq.gz	SRP488285	PRJNA1072695	SRR27878341	SAMN39749730
v1-v23-55C-03	#N/A		SRP488387	PRJNA1072797	SRR27878340	SAMN39749731	v1-v23	V2	DePCR	55C	QB	AP		v1-v23-55C-03_S71_L001_R1_001.fastq.gz	v1-v23-55C-03				V2	v1-v23	DePCR	QB	55C	AP	3	FLD0231	CGCTAATGTA	A	2.5	14413	14320	13146	none	13146	0.386353	0	74.0036	v1-v23-55C-03_S71_L001_R1_001.fastq.gz	SRP488285	PRJNA1072695	SRR27878340	SAMN39749731
v1-v23-55C-04	#N/A		SRP488388	PRJNA1072798	SRR27878339	SAMN39749732	v1-v23	V2	DePCR	55C	QB	AP		v1-v23-55C-04_S72_L001_R1_001.fastq.gz	v1-v23-55C-04				V2	v1-v23	DePCR	QB	55C	AP	4	FLD0232	GCGTCTGAAT	A	2.5	12714	12612	11538	none	11538	0.39673	0	72.8979	v1-v23-55C-04_S72_L001_R1_001.fastq.gz	SRP488285	PRJNA1072695	SRR27878339	SAMN39749732
v1-v39-45C-01	#N/A		SRP488389	PRJNA1072799	SRR27878338	SAMN39749733	v1-v39	V3	DePCR	45C	QB	AP		v1-v39-45C-01_S73_L001_R1_001.fastq.gz	v1-v39-45C-01				V3	v1-v39	DePCR	QB	45C	AP	1	FLD0233	TTCTGTTGCC	A	2.5	1936	1894	1544	none	1544	0.665223	0	23.5217	v1-v39-45C-01_S73_L001_R1_001.fastq.gz	SRP488285	PRJNA1072695	SRR27878338	SAMN39749733
v1-v39-45C-02	#N/A		SRP488390	PRJNA1072800	SRR27878337	SAMN39749734	v1-v39	V3	DePCR	45C	QB	AP		v1-v39-45C-02_S74_L001_R1_001.fastq.gz	v1-v39-45C-02				V3	v1-v39	DePCR	QB	45C	AP	2	FLD0234	TTGTCCTTGC	A	2.5	584	572	438	none	438	0.676757	0	18.0556	v1-v39-45C-02_S74_L001_R1_001.fastq.gz	SRP488285	PRJNA1072695	SRR27878337	SAMN39749734
v1-v39-45C-03	#N/A		SRP488391	PRJNA1072801	SRR27878336	SAMN39749735	v1-v39	V3	DePCR	45C	QB	AP		v1-v39-45C-03_S75_L001_R1_001.fastq.gz	v1-v39-45C-03				V3	v1-v39	DePCR	QB	45C	AP	3	FLD0235	CCTGTGTAGA	A	2.5	1828	1774	1440	none	1440	0.658487	0	26.1754	v1-v39-45C-03_S75_L001_R1_001.fastq.gz	SRP488285	PRJNA1072695	SRR27878336	SAMN39749735
v1-v39-45C-04	#N/A		SRP488392	PRJNA1072802	SRR27878335	SAMN39749736	v1-v39	V3	DePCR	45C	QB	AP		v1-v39-45C-04_S76_L001_R1_001.fastq.gz	v1-v39-45C-04				V3	v1-v39	DePCR	QB	45C	AP	4	FLD0236	GATAAGAAGG	A	2.5	1207	1172	921	none	921	0.670621	0	21.1454	v1-v39-45C-04_S76_L001_R1_001.fastq.gz	SRP488285	PRJNA1072695	SRR27878335	SAMN39749736
v1-v39-55C-01	#N/A		SRP488393	PRJNA1072803	SRR27878334	SAMN39749737	v1-v39	V3	DePCR	55C	QB	AP		v1-v39-55C-01_S77_L001_R1_001.fastq.gz	v1-v39-55C-01				V3	v1-v39	DePCR	QB	55C	AP	1	FLD0237	CAGGTCACAT	A	2.5	13919	13825	12666	none	12666	0.417315	0	70.6176	v1-v39-55C-01_S77_L001_R1_001.fastq.gz	SRP488285	PRJNA1072695	SRR27878334	SAMN39749737
v1-v39-55C-02	#N/A		SRP488394	PRJNA1072804	SRR27878333	SAMN39749738	v1-v39	V3	DePCR	55C	QB	AP		v1-v39-55C-02_S78_L001_R1_001.fastq.gz	v1-v39-55C-02				V3	v1-v39	DePCR	QB	55C	AP	2	FLD0238	GCCATGTCAT	A	2.5	14749	14653	13456	none	13456	0.408194	0	71.6426	v1-v39-55C-02_S78_L001_R1_001.fastq.gz	SRP488285	PRJNA1072695	SRR27878333	SAMN39749738
v1-v39-55C-03	#N/A		SRP488395	PRJNA1072805	SRR27878331	SAMN39749739	v1-v39	V3	DePCR	55C	QB	AP		v1-v39-55C-03_S79_L001_R1_001.fastq.gz	v1-v39-55C-03				V3	v1-v39	DePCR	QB	55C	AP	3	FLD0239	TCTGCCTATA	A	2.5	6356	6305	5629	none	5629	0.406219	0	71.8615	v1-v39-55C-03_S79_L001_R1_001.fastq.gz	SRP488285	PRJNA1072695	SRR27878331	SAMN39749739
v1-v39-55C-04	#N/A		SRP488396	PRJNA1072806	SRR27878330	SAMN39749740	v1-v39	V3	DePCR	55C	QB	AP		v1-v39-55C-04_S80_L001_R1_001.fastq.gz	v1-v39-55C-04				V3	v1-v39	DePCR	QB	55C	AP	4	FLD0240	CTTAGTTCGC	A	2.5	1557	1536	1276	none	1276	0.529816	0	55.538	v1-v39-55C-04_S80_L001_R1_001.fastq.gz	SRP488285	PRJNA1072695	SRR27878330	SAMN39749740
v1-v4-45C-01	#N/A		SRP488397	PRJNA1072807	SRR27878329	SAMN39749741	v1-v4	V5	DePCR	45C	QB	AP		v1-v4-45C-01_S17_L001_R1_001.fastq.gz	v1-v4-45C-01				V5	v1-v4	DePCR	QB	45C	AP	1	FLD0241	CGTAATGAGC	A	2.5	1906	1895	1580	none	1580	0.585147	0	45.6186	v1-v4-45C-01_S17_L001_R1_001.fastq.gz	SRP488285	PRJNA1072695	SRR27878329	SAMN39749741
v1-v4-45C-02	#N/A		SRP488398	PRJNA1072808	SRR27878328	SAMN39749742	v1-v4	V5	DePCR	45C	QB	AP		v1-v4-45C-02_S18_L001_R1_001.fastq.gz	v1-v4-45C-02				V5	v1-v4	DePCR	QB	45C	AP	2	FLD0242	TTGCTTAGTC	A	2.5	2050	2032	1706	none	1706	0.584885	0	45.6716	v1-v4-45C-02_S18_L001_R1_001.fastq.gz	SRP488285	PRJNA1072695	SRR27878328	SAMN39749742
v1-v4-45C-03	#N/A		SRP488399	PRJNA1072809	SRR27878327	SAMN39749743	v1-v4	V5	DePCR	45C	QB	AP		v1-v4-45C-03_S19_L001_R1_001.fastq.gz	v1-v4-45C-03				V5	v1-v4	DePCR	QB	45C	AP	3	FLD0243	TCTTGTTCAC	A	2.5	1058	1049	822	none	822	0.563346	0	49.8155	v1-v4-45C-03_S19_L001_R1_001.fastq.gz	SRP488285	PRJNA1072695	SRR27878327	SAMN39749743
v1-v4-45C-04	#N/A		SRP488400	PRJNA1072810	SRR27878326	SAMN39749744	v1-v4	V5	DePCR	45C	QB	AP		v1-v4-45C-04_S20_L001_R1_001.fastq.gz	v1-v4-45C-04				V5	v1-v4	DePCR	QB	45C	AP	4	FLD0244	GTGGCTTCGT	A	2.5	1887	1875	1382	none	1382	0.580015	0	46.647	v1-v4-45C-04_S20_L001_R1_001.fastq.gz	SRP488285	PRJNA1072695	SRR27878326	SAMN39749744
v1-v4-55C-01	#N/A		SRP488401	PRJNA1072811	SRR27878325	SAMN39749745	v1-v4	V5	DePCR	55C	QB	AP		v1-v4-55C-01_S21_L001_R1_001.fastq.gz	v1-v4-55C-01				V5	v1-v4	DePCR	QB	55C	AP	1	FLD0245	TGTTCGATAG	A	2.5	12381	12306	11219	none	11219	0.304142	0	81.8611	v1-v4-55C-01_S21_L001_R1_001.fastq.gz	SRP488285	PRJNA1072695	SRR27878325	SAMN39749745
v1-v4-55C-02	#N/A		SRP488402	PRJNA1072812	SRR27878324	SAMN39749746	v1-v4	V5	DePCR	55C	QB	AP		v1-v4-55C-02_S22_L001_R1_001.fastq.gz	v1-v4-55C-02				V5	v1-v4	DePCR	QB	55C	AP	2	FLD0246	TCATTCAGTG	A	2.5	13943	13838	12723	none	12723	0.328256	0	79.7101	v1-v4-55C-02_S22_L001_R1_001.fastq.gz	SRP488285	PRJNA1072695	SRR27878324	SAMN39749746
v1-v4-55C-03	#N/A		SRP488403	PRJNA1072813	SRR27878323	SAMN39749747	v1-v4	V5	DePCR	55C	QB	AP		v1-v4-55C-03_S23_L001_R1_001.fastq.gz	v1-v4-55C-03				V5	v1-v4	DePCR	QB	55C	AP	3	FLD0247	GTGGAGAGCT	A	2.5	13690	13600	12506	none	12506	0.298146	0	82.3778	v1-v4-55C-03_S23_L001_R1_001.fastq.gz	SRP488285	PRJNA1072695	SRR27878323	SAMN39749747
v1-v4-55C-04	#N/A		SRP488404	PRJNA1072814	SRR27878322	SAMN39749748	v1-v4	V5	DePCR	55C	QB	AP		v1-v4-55C-04_S24_L001_R1_001.fastq.gz	v1-v4-55C-04				V5	v1-v4	DePCR	QB	55C	AP	4	FLD0248	GTAGAAGTGG	A	2.5	10269	10200	9318	none	9318	0.278332	0	84.0358	v1-v4-55C-04_S24_L001_R1_001.fastq.gz	SRP488285	PRJNA1072695	SRR27878322	SAMN39749748
v1-v55-45C-01	#N/A		SRP488405	PRJNA1072815	SRR27878320	SAMN39749749	v1-v55	V1	DePCR	45C	QB	AP		v1-v55-45C-01_S81_L001_R1_001.fastq.gz	v1-v55-45C-01				V1	v1-v55	DePCR	QB	45C	AP	1	FLD0249	TGGAGCATGT	A	2.5	1384	1373	1071	none	1071	0.675007	0	18.9897	v1-v55-45C-01_S81_L001_R1_001.fastq.gz	SRP488285	PRJNA1072695	SRR27878320	SAMN39749749
v1-v55-45C-02	#N/A		SRP488406	PRJNA1072816	SRR27878319	SAMN39749750	v1-v55	V1	DePCR	45C	QB	AP		v1-v55-45C-02_S82_L001_R1_001.fastq.gz	v1-v55-45C-02				V1	v1-v55	DePCR	QB	45C	AP	2	FLD0250	GAAGGAGATA	A	2.5	658	650	495	none	495	0.641969	0	31.7172	v1-v55-45C-02_S82_L001_R1_001.fastq.gz	SRP488285	PRJNA1072695	SRR27878319	SAMN39749750
v1-v55-45C-03	#N/A		SRP488407	PRJNA1072817	SRR27878318	SAMN39749751	v1-v55	V1	DePCR	45C	QB	AP		v1-v55-45C-03_S83_L001_R1_001.fastq.gz	v1-v55-45C-03				V1	v1-v55	DePCR	QB	45C	AP	3	FLD0251	CGAATGTATG	A	2.5	1548	1540	1253	none	1253	0.676417	0	18.241	v1-v55-45C-03_S83_L001_R1_001.fastq.gz	SRP488285	PRJNA1072695	SRR27878318	SAMN39749751
v1-v55-45C-04	#N/A		SRP488408	PRJNA1072818	SRR27878317	SAMN39749752	v1-v55	V1	DePCR	45C	QB	AP		v1-v55-45C-04_S84_L001_R1_001.fastq.gz	v1-v55-45C-04				V1	v1-v55	DePCR	QB	45C	AP	4	FLD0252	TCGTGAATGA	A	2.5	1566	1548	1223	none	1223	0.674324	0	19.3416	v1-v55-45C-04_S84_L001_R1_001.fastq.gz	SRP488285	PRJNA1072695	SRR27878317	SAMN39749752
v1-v55-55C-01	#N/A		SRP488409	PRJNA1072819	SRR27878316	SAMN39749753	v1-v55	V1	DePCR	55C	QB	AP		v1-v55-55C-01_S85_L001_R1_001.fastq.gz	v1-v55-55C-01				V1	v1-v55	DePCR	QB	55C	AP	1	FLD0253	GAATAGCTGA	A	2.5	1803	1768	1393	none	1393	0.583664	0	45.9184	v1-v55-55C-01_S85_L001_R1_001.fastq.gz	SRP488285	PRJNA1072695	SRR27878316	SAMN39749753
v1-v55-55C-02	#N/A		SRP488410	PRJNA1072820	SRR27878315	SAMN39749754	v1-v55	V1	DePCR	55C	QB	AP		v1-v55-55C-02_S86_L001_R1_001.fastq.gz	v1-v55-55C-02				V1	v1-v55	DePCR	QB	55C	AP	2	FLD0254	TTGTCACATC	A	2.5	12771	12683	11568	none	11568	0.416627	0	70.6957	v1-v55-55C-02_S86_L001_R1_001.fastq.gz	SRP488285	PRJNA1072695	SRR27878315	SAMN39749754
v1-v55-55C-03	#N/A		SRP488411	PRJNA1072821	SRR27878314	SAMN39749755	v1-v55	V1	DePCR	55C	QB	AP		v1-v55-55C-03_S87_L001_R1_001.fastq.gz	v1-v55-55C-03				V1	v1-v55	DePCR	QB	55C	AP	3	FLD0255	CTGGAGGCTA	A	2.5	4127	4095	3609	none	3609	0.434766	0	68.5876	v1-v55-55C-03_S87_L001_R1_001.fastq.gz	SRP488285	PRJNA1072695	SRR27878314	SAMN39749755
v1-v55-55C-04	#N/A		SRP488412	PRJNA1072822	SRR27878313	SAMN39749756	v1-v55	V1	DePCR	55C	QB	AP		v1-v55-55C-04_S88_L001_R1_001.fastq.gz	v1-v55-55C-04				V1	v1-v55	DePCR	QB	55C	AP	4	FLD0256	TGTCAGCTTA	A	2.5	1437	1429	1161	none	1161	0.581918	0	46.2687	v1-v55-55C-04_S88_L001_R1_001.fastq.gz	SRP488285	PRJNA1072695	SRR27878313	SAMN39749756
v1-v6-45C-01	#N/A		SRP488413	PRJNA1072823	SRR27878288	SAMN39749757	v1-v6	V7	DePCR	45C	QB	AP		v1-v6-45C-01_S25_L001_R1_001.fastq.gz	v1-v6-45C-01				V7	v1-v6	DePCR	QB	45C	AP	1	FLD0257	GTTCTTCGTA	A	2.5	511	504	376	none	376	0.231968	0	87.6344	v1-v6-45C-01_S25_L001_R1_001.fastq.gz	SRP488285	PRJNA1072695	SRR27878288	SAMN39749757
v1-v6-45C-02	#N/A		SRP488414	PRJNA1072824	SRR27878286	SAMN39749758	v1-v6	V7	DePCR	45C	QB	AP		v1-v6-45C-02_S26_L001_R1_001.fastq.gz	v1-v6-45C-02				V7	v1-v6	DePCR	QB	45C	AP	2	FLD0258	TCGCTGAACA	A	2.5	1287	1274	1012	none	1012	0.288432	0	83.2	v1-v6-45C-02_S26_L001_R1_001.fastq.gz	SRP488285	PRJNA1072695	SRR27878286	SAMN39749758
v1-v6-45C-03	#N/A		SRP488415	PRJNA1072825	SRR27878284	SAMN39749759	v1-v6	V7	DePCR	45C	QB	AP		v1-v6-45C-03_S27_L001_R1_001.fastq.gz	v1-v6-45C-03				V7	v1-v6	DePCR	QB	45C	AP	3	FLD0259	GTAGCCAGTA	A	2.5	1243	1235	1026	none	1026	0.31162	0	81.2067	v1-v6-45C-03_S27_L001_R1_001.fastq.gz	SRP488285	PRJNA1072695	SRR27878284	SAMN39749759
v1-v6-45C-04	#N/A		SRP488416	PRJNA1072826	SRR27878283	SAMN39749760	v1-v6	V7	DePCR	45C	QB	AP		v1-v6-45C-04_S28_L001_R1_001.fastq.gz	v1-v6-45C-04				V7	v1-v6	DePCR	QB	45C	AP	4	FLD0260	TGAGAAGGTA	A	2.5	1351	1341	1118	none	1118	0.293003	0	82.8154	v1-v6-45C-04_S28_L001_R1_001.fastq.gz	SRP488285	PRJNA1072695	SRR27878283	SAMN39749760
v1-v6-55C-01	#N/A		SRP488417	PRJNA1072827	SRR27878282	SAMN39749761	v1-v6	V7	DePCR	55C	QB	AP		v1-v6-55C-01_S29_L001_R1_001.fastq.gz	v1-v6-55C-01				V7	v1-v6	DePCR	QB	55C	AP	1	FLD0261	CCATATGATC	A	2.5	11003	10921	10088	none	10088	0.0531271	0	98.1242	v1-v6-55C-01_S29_L001_R1_001.fastq.gz	SRP488285	PRJNA1072695	SRR27878282	SAMN39749761
v1-v6-55C-02	#N/A		SRP488418	PRJNA1072828	SRR27878281	SAMN39749762	v1-v6	V7	DePCR	55C	QB	AP		v1-v6-55C-02_S30_L001_R1_001.fastq.gz	v1-v6-55C-02				V7	v1-v6	DePCR	QB	55C	AP	2	FLD0262	CGATCCTATA	A	2.5	11582	11487	10608	none	10608	0.0455755	0	98.4422	v1-v6-55C-02_S30_L001_R1_001.fastq.gz	SRP488285	PRJNA1072695	SRR27878281	SAMN39749762
v1-v6-55C-03	#N/A		SRP488419	PRJNA1072829	SRR27878280	SAMN39749763	v1-v6	V7	DePCR	55C	QB	AP		v1-v6-55C-03_S31_L001_R1_001.fastq.gz	v1-v6-55C-03				V7	v1-v6	DePCR	QB	55C	AP	3	FLD0263	TTCGAGCTAT	A	2.5	12518	12421	11441	none	11441	0.0537703	0	98.0966	v1-v6-55C-03_S31_L001_R1_001.fastq.gz	SRP488285	PRJNA1072695	SRR27878280	SAMN39749763
v1-v6-55C-04	#N/A		SRP488420	PRJNA1072830	SRR27878279	SAMN39749764	v1-v6	V7	DePCR	55C	QB	AP		v1-v6-55C-04_S32_L001_R1_001.fastq.gz	v1-v6-55C-04				V7	v1-v6	DePCR	QB	55C	AP	4	FLD0264	TAACTCTGCT	A	2.5	12924	12813	11852	none	11852	0.046153	0	98.4183	v1-v6-55C-04_S32_L001_R1_001.fastq.gz	SRP488285	PRJNA1072695	SRR27878279	SAMN39749764
v1-v7-45C-01	#N/A		SRP488421	PRJNA1072831	SRR27878278	SAMN39749765	v1-v7	V9	DePCR	45C	QB	AP		v1-v7-45C-01_S33_L001_R1_001.fastq.gz	v1-v7-45C-01				V9	v1-v7	DePCR	QB	45C	AP	1	FLD0265	TCGAATGTGC	A	2.5	1282	1270	844	none	844	0.276505	0	84.1849	v1-v7-45C-01_S33_L001_R1_001.fastq.gz	SRP488285	PRJNA1072695	SRR27878278	SAMN39749765
v1-v7-45C-02	#N/A		SRP488422	PRJNA1072832	SRR27878277	SAMN39749766	v1-v7	V9	DePCR	45C	QB	AP		v1-v7-45C-02_S34_L001_R1_001.fastq.gz	v1-v7-45C-02				V9	v1-v7	DePCR	QB	45C	AP	2	FLD0266	TTGCAGATCA	A	2.5	1575	1559	1311	none	1311	0.327812	0	79.7508	v1-v7-45C-02_S34_L001_R1_001.fastq.gz	SRP488285	PRJNA1072695	SRR27878277	SAMN39749766
v1-v7-45C-03	#N/A		SRP488423	PRJNA1072833	SRR27878276	SAMN39749767	v1-v7	V9	DePCR	45C	QB	AP		v1-v7-45C-03_S35_L001_R1_001.fastq.gz	v1-v7-45C-03				V9	v1-v7	DePCR	QB	45C	AP	3	FLD0267	GCGTTATTGC	A	2.5	1232	1217	1000	none	1000	0.301466	0	82.0926	v1-v7-45C-03_S35_L001_R1_001.fastq.gz	SRP488285	PRJNA1072695	SRR27878276	SAMN39749767
v1-v7-45C-04	#N/A		SRP488424	PRJNA1072834	SRR27878275	SAMN39749768	v1-v7	V9	DePCR	45C	QB	AP		v1-v7-45C-04_S36_L001_R1_001.fastq.gz	v1-v7-45C-04				V9	v1-v7	DePCR	QB	45C	AP	4	FLD0268	GAACTATCAC	A	2.5	1078	1073	888	none	888	0.330807	0	79.4755	v1-v7-45C-04_S36_L001_R1_001.fastq.gz	SRP488285	PRJNA1072695	SRR27878275	SAMN39749768
v1-v7-55C-01	#N/A		SRP488425	PRJNA1072835	SRR27878273	SAMN39749769	v1-v7	V9	DePCR	55C	QB	AP		v1-v7-55C-01_S37_L001_R1_001.fastq.gz	v1-v7-55C-01				V9	v1-v7	DePCR	QB	55C	AP	1	FLD0269	TCGAGGTACT	A	2.5	12754	12679	11663	none	11663	0.0580686	0	97.9096	v1-v7-55C-01_S37_L001_R1_001.fastq.gz	SRP488285	PRJNA1072695	SRR27878273	SAMN39749769
v1-v7-55C-02	#N/A		SRP488426	PRJNA1072836	SRR27878272	SAMN39749770	v1-v7	V9	DePCR	55C	QB	AP		v1-v7-55C-02_S38_L001_R1_001.fastq.gz	v1-v7-55C-02				V9	v1-v7	DePCR	QB	55C	AP	2	FLD0270	TGCGGATGGT	A	2.5	12761	12675	11731	none	11731	0.045741	0	98.4353	v1-v7-55C-02_S38_L001_R1_001.fastq.gz	SRP488285	PRJNA1072695	SRR27878272	SAMN39749770
v1-v7-55C-03	#N/A		SRP488427	PRJNA1072837	SRR27878271	SAMN39749771	v1-v7	V9	DePCR	55C	QB	AP		v1-v7-55C-03_S39_L001_R1_001.fastq.gz	v1-v7-55C-03				V9	v1-v7	DePCR	QB	55C	AP	3	FLD0271	GATCCTGAGC	A	2.5	11093	11007	10143	none	10143	0.0552256	0	98.0337	v1-v7-55C-03_S39_L001_R1_001.fastq.gz	SRP488285	PRJNA1072695	SRR27878271	SAMN39749771
v1-v7-55C-04	#N/A		SRP488428	PRJNA1072838	SRR27878270	SAMN39749772	v1-v7	V9	DePCR	55C	QB	AP		v1-v7-55C-04_S40_L001_R1_001.fastq.gz	v1-v7-55C-04				V9	v1-v7	DePCR	QB	55C	AP	4	FLD0272	GGTCTGGTGT	A	2.5	10782	10692	9848	none	9848	0.0488639	0	98.3053	v1-v7-55C-04_S40_L001_R1_001.fastq.gz	SRP488285	PRJNA1072695	SRR27878270	SAMN39749772
v1-v8-45C-01	#N/A		SRP488429	PRJNA1072839	SRR27878269	SAMN39749773	v1-v8	V8	DePCR	45C	QB	AP		v1-v8-45C-01_S41_L001_R1_001.fastq.gz	v1-v8-45C-01				V8	v1-v8	DePCR	QB	45C	AP	1	FLD0273	CTAAGTCATG	A	2.5	1680	1672	1380	none	1380	0.400162	0	72.5258	v1-v8-45C-01_S41_L001_R1_001.fastq.gz	SRP488285	PRJNA1072695	SRR27878269	SAMN39749773
v1-v8-45C-02	#N/A		SRP488430	PRJNA1072840	SRR27878268	SAMN39749774	v1-v8	V8	DePCR	45C	QB	AP		v1-v8-45C-02_S42_L001_R1_001.fastq.gz	v1-v8-45C-02				V8	v1-v8	DePCR	QB	45C	AP	2	FLD0274	GTCTTGGCTC	A	2.5	1461	1421	708	none	708	0.41958	0	70.3593	v1-v8-45C-02_S42_L001_R1_001.fastq.gz	SRP488285	PRJNA1072695	SRR27878268	SAMN39749774
v1-v8-45C-03	#N/A		SRP488431	PRJNA1072841	SRR27878267	SAMN39749775	v1-v8	V8	DePCR	45C	QB	AP		v1-v8-45C-03_S43_L001_R1_001.fastq.gz	v1-v8-45C-03				V8	v1-v8	DePCR	QB	45C	AP	3	FLD0275	CTGCGAATGT	A	2.5	2078	2040	1239	none	1239	0.390251	0	73.5915	v1-v8-45C-03_S43_L001_R1_001.fastq.gz	SRP488285	PRJNA1072695	SRR27878267	SAMN39749775
v1-v8-45C-04	#N/A		SRP488432	PRJNA1072842	SRR27878266	SAMN39749776	v1-v8	V8	DePCR	45C	QB	AP		v1-v8-45C-04_S44_L001_R1_001.fastq.gz	v1-v8-45C-04				V8	v1-v8	DePCR	QB	45C	AP	4	FLD0276	CTGTTCTAGC	A	2.5	1325	1311	1085	none	1085	0.436081	0	68.4308	v1-v8-45C-04_S44_L001_R1_001.fastq.gz	SRP488285	PRJNA1072695	SRR27878266	SAMN39749776
v1-v8-55C-01	#N/A		SRP488433	PRJNA1072843	SRR27878265	SAMN39749777	v1-v8	V8	DePCR	55C	QB	AP		v1-v8-55C-01_S45_L001_R1_001.fastq.gz	v1-v8-55C-01				V8	v1-v8	DePCR	QB	55C	AP	1	FLD0277	CACTTGTGTG	A	2.5	11063	10971	10101	none	10101	0.0757511	0	97.1014	v1-v8-55C-01_S45_L001_R1_001.fastq.gz	SRP488285	PRJNA1072695	SRR27878265	SAMN39749777
v1-v8-55C-02	#N/A		SRP488434	PRJNA1072844	SRR27878264	SAMN39749778	v1-v8	V8	DePCR	55C	QB	AP		v1-v8-55C-02_S46_L001_R1_001.fastq.gz	v1-v8-55C-02				V8	v1-v8	DePCR	QB	55C	AP	2	FLD0278	TGGATGACAT	A	2.5	9873	9805	8963	none	8963	0.06566	0	97.5701	v1-v8-55C-02_S46_L001_R1_001.fastq.gz	SRP488285	PRJNA1072695	SRR27878264	SAMN39749778
v1-v8-55C-03	#N/A		SRP488435	PRJNA1072845	SRR27878262	SAMN39749779	v1-v8	V8	DePCR	55C	QB	AP		v1-v8-55C-03_S47_L001_R1_001.fastq.gz	v1-v8-55C-03				V8	v1-v8	DePCR	QB	55C	AP	3	FLD0279	TTACGCAGTG	A	2.5	11807	11730	10793	none	10793	0.0717868	0	97.2879	v1-v8-55C-03_S47_L001_R1_001.fastq.gz	SRP488285	PRJNA1072695	SRR27878262	SAMN39749779
v1-v8-55C-04	#N/A		SRP488436	PRJNA1072846	SRR27878261	SAMN39749780	v1-v8	V8	DePCR	55C	QB	AP		v1-v8-55C-04_S48_L001_R1_001.fastq.gz	v1-v8-55C-04				V8	v1-v8	DePCR	QB	55C	AP	4	FLD0280	GTCGGTCTGA	A	2.5	10345	10271	9442	none	9442	0.0774755	0	97.0194	v1-v8-55C-04_S48_L001_R1_001.fastq.gz	SRP488285	PRJNA1072695	SRR27878261	SAMN39749780

## Sheet: renaming (2)
SampleID	VLOOKUP(A2,[biosample_data.csv]biosample_data!$A:$C,3,0)	SRA_number	SRS_number	original_Exp_name	current_Exp_name		PCR		Enz		Temp		group		Rpl		Read	ext			file_name	.bat
DT-DePCR-45-01_S118_L001_R1_001.fastq.gz	#N/A	DT-DePCR-45-01_S118_L001_R1_001.fastq.gz	DT-DePCR-45-01_S118_L001_R1_001.fastq.gz	A1	A01	_	DePCR	_	DT	_	45C	_	A	_	1	_	R1	.fastq.gz	_1		A01_DePCR_DT_45C_A_1_R1.fastq.gz	move DT-DePCR-45-01_S118_L001_R1_001.fastq.gz renamed/A01_DePCR_DT_45C_A_1_R1.fastq.gz
DT-DePCR-45-01_S118_L001_R2_001.fastq.gz	#N/A	DT-DePCR-45-01_S118_L001_R2_001.fastq.gz	DT-DePCR-45-01_S118_L001_R2_001.fastq.gz	A1	A01	_	DePCR	_	DT	_	45C	_	A	_	1	_	R2	.fastq.gz	_2		A01_DePCR_DT_45C_A_1_R2.fastq.gz	move DT-DePCR-45-01_S118_L001_R2_001.fastq.gz renamed/A01_DePCR_DT_45C_A_1_R2.fastq.gz
DT-DePCR-45-02_S119_L001_R1_001.fastq.gz	#N/A	DT-DePCR-45-02_S119_L001_R1_001.fastq.gz	DT-DePCR-45-02_S119_L001_R1_001.fastq.gz	A1	A01	_	DePCR	_	DT	_	45C	_	A	_	2	_	R1	.fastq.gz	_1		A01_DePCR_DT_45C_A_2_R1.fastq.gz	move DT-DePCR-45-02_S119_L001_R1_001.fastq.gz renamed/A01_DePCR_DT_45C_A_2_R1.fastq.gz
DT-DePCR-45-02_S119_L001_R2_001.fastq.gz	#N/A	DT-DePCR-45-02_S119_L001_R2_001.fastq.gz	DT-DePCR-45-02_S119_L001_R2_001.fastq.gz	A1	A01	_	DePCR	_	DT	_	45C	_	A	_	2	_	R2	.fastq.gz	_2		A01_DePCR_DT_45C_A_2_R2.fastq.gz	move DT-DePCR-45-02_S119_L001_R2_001.fastq.gz renamed/A01_DePCR_DT_45C_A_2_R2.fastq.gz
DT-DePCR-45-03_S120_L001_R1_001.fastq.gz	#N/A	DT-DePCR-45-03_S120_L001_R1_001.fastq.gz	DT-DePCR-45-03_S120_L001_R1_001.fastq.gz	A1	A01	_	DePCR	_	DT	_	45C	_	A	_	3	_	R1	.fastq.gz	_1		A01_DePCR_DT_45C_A_3_R1.fastq.gz	move DT-DePCR-45-03_S120_L001_R1_001.fastq.gz renamed/A01_DePCR_DT_45C_A_3_R1.fastq.gz
DT-DePCR-45-03_S120_L001_R2_001.fastq.gz	#N/A	DT-DePCR-45-03_S120_L001_R2_001.fastq.gz	DT-DePCR-45-03_S120_L001_R2_001.fastq.gz	A1	A01	_	DePCR	_	DT	_	45C	_	A	_	3	_	R2	.fastq.gz	_2		A01_DePCR_DT_45C_A_3_R2.fastq.gz	move DT-DePCR-45-03_S120_L001_R2_001.fastq.gz renamed/A01_DePCR_DT_45C_A_3_R2.fastq.gz
DT-DePCR-45-04_S121_L001_R1_001.fastq.gz	#N/A	DT-DePCR-45-04_S121_L001_R1_001.fastq.gz	DT-DePCR-45-04_S121_L001_R1_001.fastq.gz	A1	A01	_	DePCR	_	DT	_	45C	_	A	_	4	_	R1	.fastq.gz	_1		A01_DePCR_DT_45C_A_4_R1.fastq.gz	move DT-DePCR-45-04_S121_L001_R1_001.fastq.gz renamed/A01_DePCR_DT_45C_A_4_R1.fastq.gz
DT-DePCR-45-04_S121_L001_R2_001.fastq.gz	#N/A	DT-DePCR-45-04_S121_L001_R2_001.fastq.gz	DT-DePCR-45-04_S121_L001_R2_001.fastq.gz	A1	A01	_	DePCR	_	DT	_	45C	_	A	_	4	_	R2	.fastq.gz	_2		A01_DePCR_DT_45C_A_4_R2.fastq.gz	move DT-DePCR-45-04_S121_L001_R2_001.fastq.gz renamed/A01_DePCR_DT_45C_A_4_R2.fastq.gz
DT-DePCR-45-05_S122_L001_R1_001.fastq.gz	#N/A	DT-DePCR-45-05_S122_L001_R1_001.fastq.gz	DT-DePCR-45-05_S122_L001_R1_001.fastq.gz	A1	A01	_	DePCR	_	DT	_	45C	_	A	_	5	_	R1	.fastq.gz	_1		A01_DePCR_DT_45C_A_5_R1.fastq.gz	move DT-DePCR-45-05_S122_L001_R1_001.fastq.gz renamed/A01_DePCR_DT_45C_A_5_R1.fastq.gz
DT-DePCR-45-05_S122_L001_R2_001.fastq.gz	#N/A	DT-DePCR-45-05_S122_L001_R2_001.fastq.gz	DT-DePCR-45-05_S122_L001_R2_001.fastq.gz	A1	A01	_	DePCR	_	DT	_	45C	_	A	_	5	_	R2	.fastq.gz	_2		A01_DePCR_DT_45C_A_5_R2.fastq.gz	move DT-DePCR-45-05_S122_L001_R2_001.fastq.gz renamed/A01_DePCR_DT_45C_A_5_R2.fastq.gz
DT-DePCR-45-06_S123_L001_R1_001.fastq.gz	#N/A	DT-DePCR-45-06_S123_L001_R1_001.fastq.gz	DT-DePCR-45-06_S123_L001_R1_001.fastq.gz	A1	A01	_	DePCR	_	DT	_	45C	_	A	_	6	_	R1	.fastq.gz	_1		A01_DePCR_DT_45C_A_6_R1.fastq.gz	move DT-DePCR-45-06_S123_L001_R1_001.fastq.gz renamed/A01_DePCR_DT_45C_A_6_R1.fastq.gz
DT-DePCR-45-06_S123_L001_R2_001.fastq.gz	#N/A	DT-DePCR-45-06_S123_L001_R2_001.fastq.gz	DT-DePCR-45-06_S123_L001_R2_001.fastq.gz	A1	A01	_	DePCR	_	DT	_	45C	_	A	_	6	_	R2	.fastq.gz	_2		A01_DePCR_DT_45C_A_6_R2.fastq.gz	move DT-DePCR-45-06_S123_L001_R2_001.fastq.gz renamed/A01_DePCR_DT_45C_A_6_R2.fastq.gz
DT-DePCR-45-07_S124_L001_R1_001.fastq.gz	#N/A	DT-DePCR-45-07_S124_L001_R1_001.fastq.gz	DT-DePCR-45-07_S124_L001_R1_001.fastq.gz	A1	A01	_	DePCR	_	DT	_	45C	_	A	_	7	_	R1	.fastq.gz	_1		A01_DePCR_DT_45C_A_7_R1.fastq.gz	move DT-DePCR-45-07_S124_L001_R1_001.fastq.gz renamed/A01_DePCR_DT_45C_A_7_R1.fastq.gz
DT-DePCR-45-07_S124_L001_R2_001.fastq.gz	#N/A	DT-DePCR-45-07_S124_L001_R2_001.fastq.gz	DT-DePCR-45-07_S124_L001_R2_001.fastq.gz	A1	A01	_	DePCR	_	DT	_	45C	_	A	_	7	_	R2	.fastq.gz	_2		A01_DePCR_DT_45C_A_7_R2.fastq.gz	move DT-DePCR-45-07_S124_L001_R2_001.fastq.gz renamed/A01_DePCR_DT_45C_A_7_R2.fastq.gz
DT-DePCR-45-08_S125_L001_R1_001.fastq.gz	#N/A	DT-DePCR-45-08_S125_L001_R1_001.fastq.gz	DT-DePCR-45-08_S125_L001_R1_001.fastq.gz	A1	A01	_	DePCR	_	DT	_	45C	_	A	_	8	_	R1	.fastq.gz	_1		A01_DePCR_DT_45C_A_8_R1.fastq.gz	move DT-DePCR-45-08_S125_L001_R1_001.fastq.gz renamed/A01_DePCR_DT_45C_A_8_R1.fastq.gz
DT-DePCR-45-08_S125_L001_R2_001.fastq.gz	#N/A	DT-DePCR-45-08_S125_L001_R2_001.fastq.gz	DT-DePCR-45-08_S125_L001_R2_001.fastq.gz	A1	A01	_	DePCR	_	DT	_	45C	_	A	_	8	_	R2	.fastq.gz	_2		A01_DePCR_DT_45C_A_8_R2.fastq.gz	move DT-DePCR-45-08_S125_L001_R2_001.fastq.gz renamed/A01_DePCR_DT_45C_A_8_R2.fastq.gz
DT-DePCR-55-01_S126_L001_R1_001.fastq.gz	#N/A	DT-DePCR-55-01_S126_L001_R1_001.fastq.gz	DT-DePCR-55-01_S126_L001_R1_001.fastq.gz	A1	A01	_	DePCR	_	DT	_	55C	_	A	_	1	_	R1	.fastq.gz	_1		A01_DePCR_DT_55C_A_1_R1.fastq.gz	move DT-DePCR-55-01_S126_L001_R1_001.fastq.gz renamed/A01_DePCR_DT_55C_A_1_R1.fastq.gz
DT-DePCR-55-01_S126_L001_R2_001.fastq.gz	#N/A	DT-DePCR-55-01_S126_L001_R2_001.fastq.gz	DT-DePCR-55-01_S126_L001_R2_001.fastq.gz	A1	A01	_	DePCR	_	DT	_	55C	_	A	_	1	_	R2	.fastq.gz	_2		A01_DePCR_DT_55C_A_1_R2.fastq.gz	move DT-DePCR-55-01_S126_L001_R2_001.fastq.gz renamed/A01_DePCR_DT_55C_A_1_R2.fastq.gz
DT-DePCR-55-02_S127_L001_R1_001.fastq.gz	#N/A	DT-DePCR-55-02_S127_L001_R1_001.fastq.gz	DT-DePCR-55-02_S127_L001_R1_001.fastq.gz	A1	A01	_	DePCR	_	DT	_	55C	_	A	_	2	_	R1	.fastq.gz	_1		A01_DePCR_DT_55C_A_2_R1.fastq.gz	move DT-DePCR-55-02_S127_L001_R1_001.fastq.gz renamed/A01_DePCR_DT_55C_A_2_R1.fastq.gz
DT-DePCR-55-02_S127_L001_R2_001.fastq.gz	#N/A	DT-DePCR-55-02_S127_L001_R2_001.fastq.gz	DT-DePCR-55-02_S127_L001_R2_001.fastq.gz	A1	A01	_	DePCR	_	DT	_	55C	_	A	_	2	_	R2	.fastq.gz	_2		A01_DePCR_DT_55C_A_2_R2.fastq.gz	move DT-DePCR-55-02_S127_L001_R2_001.fastq.gz renamed/A01_DePCR_DT_55C_A_2_R2.fastq.gz
DT-DePCR-55-03_S128_L001_R1_001.fastq.gz	#N/A	DT-DePCR-55-03_S128_L001_R1_001.fastq.gz	DT-DePCR-55-03_S128_L001_R1_001.fastq.gz	A1	A01	_	DePCR	_	DT	_	55C	_	A	_	3	_	R1	.fastq.gz	_1		A01_DePCR_DT_55C_A_3_R1.fastq.gz	move DT-DePCR-55-03_S128_L001_R1_001.fastq.gz renamed/A01_DePCR_DT_55C_A_3_R1.fastq.gz
DT-DePCR-55-03_S128_L001_R2_001.fastq.gz	#N/A	DT-DePCR-55-03_S128_L001_R2_001.fastq.gz	DT-DePCR-55-03_S128_L001_R2_001.fastq.gz	A1	A01	_	DePCR	_	DT	_	55C	_	A	_	3	_	R2	.fastq.gz	_2		A01_DePCR_DT_55C_A_3_R2.fastq.gz	move DT-DePCR-55-03_S128_L001_R2_001.fastq.gz renamed/A01_DePCR_DT_55C_A_3_R2.fastq.gz
DT-DePCR-55-04_S129_L001_R1_001.fastq.gz	#N/A	DT-DePCR-55-04_S129_L001_R1_001.fastq.gz	DT-DePCR-55-04_S129_L001_R1_001.fastq.gz	A1	A01	_	DePCR	_	DT	_	55C	_	A	_	4	_	R1	.fastq.gz	_1		A01_DePCR_DT_55C_A_4_R1.fastq.gz	move DT-DePCR-55-04_S129_L001_R1_001.fastq.gz renamed/A01_DePCR_DT_55C_A_4_R1.fastq.gz
DT-DePCR-55-04_S129_L001_R2_001.fastq.gz	#N/A	DT-DePCR-55-04_S129_L001_R2_001.fastq.gz	DT-DePCR-55-04_S129_L001_R2_001.fastq.gz	A1	A01	_	DePCR	_	DT	_	55C	_	A	_	4	_	R2	.fastq.gz	_2		A01_DePCR_DT_55C_A_4_R2.fastq.gz	move DT-DePCR-55-04_S129_L001_R2_001.fastq.gz renamed/A01_DePCR_DT_55C_A_4_R2.fastq.gz
DT-DePCR-55-05_S130_L001_R1_001.fastq.gz	#N/A	DT-DePCR-55-05_S130_L001_R1_001.fastq.gz	DT-DePCR-55-05_S130_L001_R1_001.fastq.gz	A1	A01	_	DePCR	_	DT	_	55C	_	A	_	5	_	R1	.fastq.gz	_1		A01_DePCR_DT_55C_A_5_R1.fastq.gz	move DT-DePCR-55-05_S130_L001_R1_001.fastq.gz renamed/A01_DePCR_DT_55C_A_5_R1.fastq.gz
DT-DePCR-55-05_S130_L001_R2_001.fastq.gz	#N/A	DT-DePCR-55-05_S130_L001_R2_001.fastq.gz	DT-DePCR-55-05_S130_L001_R2_001.fastq.gz	A1	A01	_	DePCR	_	DT	_	55C	_	A	_	5	_	R2	.fastq.gz	_2		A01_DePCR_DT_55C_A_5_R2.fastq.gz	move DT-DePCR-55-05_S130_L001_R2_001.fastq.gz renamed/A01_DePCR_DT_55C_A_5_R2.fastq.gz
DT-DePCR-55-06_S131_L001_R1_001.fastq.gz	#N/A	DT-DePCR-55-06_S131_L001_R1_001.fastq.gz	DT-DePCR-55-06_S131_L001_R1_001.fastq.gz	A1	A01	_	DePCR	_	DT	_	55C	_	A	_	6	_	R1	.fastq.gz	_1		A01_DePCR_DT_55C_A_6_R1.fastq.gz	move DT-DePCR-55-06_S131_L001_R1_001.fastq.gz renamed/A01_DePCR_DT_55C_A_6_R1.fastq.gz
DT-DePCR-55-06_S131_L001_R2_001.fastq.gz	#N/A	DT-DePCR-55-06_S131_L001_R2_001.fastq.gz	DT-DePCR-55-06_S131_L001_R2_001.fastq.gz	A1	A01	_	DePCR	_	DT	_	55C	_	A	_	6	_	R2	.fastq.gz	_2		A01_DePCR_DT_55C_A_6_R2.fastq.gz	move DT-DePCR-55-06_S131_L001_R2_001.fastq.gz renamed/A01_DePCR_DT_55C_A_6_R2.fastq.gz
DT-DePCR-55-07_S132_L001_R1_001.fastq.gz	#N/A	DT-DePCR-55-07_S132_L001_R1_001.fastq.gz	DT-DePCR-55-07_S132_L001_R1_001.fastq.gz	A1	A01	_	DePCR	_	DT	_	55C	_	A	_	7	_	R1	.fastq.gz	_1		A01_DePCR_DT_55C_A_7_R1.fastq.gz	move DT-DePCR-55-07_S132_L001_R1_001.fastq.gz renamed/A01_DePCR_DT_55C_A_7_R1.fastq.gz
DT-DePCR-55-07_S132_L001_R2_001.fastq.gz	#N/A	DT-DePCR-55-07_S132_L001_R2_001.fastq.gz	DT-DePCR-55-07_S132_L001_R2_001.fastq.gz	A1	A01	_	DePCR	_	DT	_	55C	_	A	_	7	_	R2	.fastq.gz	_2		A01_DePCR_DT_55C_A_7_R2.fastq.gz	move DT-DePCR-55-07_S132_L001_R2_001.fastq.gz renamed/A01_DePCR_DT_55C_A_7_R2.fastq.gz
DT-DePCR-55-08_S133_L001_R1_001.fastq.gz	#N/A	DT-DePCR-55-08_S133_L001_R1_001.fastq.gz	DT-DePCR-55-08_S133_L001_R1_001.fastq.gz	A1	A01	_	DePCR	_	DT	_	55C	_	A	_	8	_	R1	.fastq.gz	_1		A01_DePCR_DT_55C_A_8_R1.fastq.gz	move DT-DePCR-55-08_S133_L001_R1_001.fastq.gz renamed/A01_DePCR_DT_55C_A_8_R1.fastq.gz
DT-DePCR-55-08_S133_L001_R2_001.fastq.gz	#N/A	DT-DePCR-55-08_S133_L001_R2_001.fastq.gz	DT-DePCR-55-08_S133_L001_R2_001.fastq.gz	A1	A01	_	DePCR	_	DT	_	55C	_	A	_	8	_	R2	.fastq.gz	_2		A01_DePCR_DT_55C_A_8_R2.fastq.gz	move DT-DePCR-55-08_S133_L001_R2_001.fastq.gz renamed/A01_DePCR_DT_55C_A_8_R2.fastq.gz
A1-45-1	SRS4213451	214644436	SRS4213451	A1	A01	_	DePCR	_	MT	_	45C	_	A	_	1	_	R1	.fastq	_1		A01_DePCR_MT_45C_A_1_R1.fastq	move SRS4213451_1.fastq renamed/A01_DePCR_MT_45C_A_1_R1.fastq
A1-45-1	SRS4213451	214644436	SRS4213451	A1	A01	_	DePCR	_	MT	_	45C	_	A	_	1	_	R2	.fastq	_2		A01_DePCR_MT_45C_A_1_R2.fastq	move SRS4213451_2.fastq renamed/A01_DePCR_MT_45C_A_1_R2.fastq
A1-45-2	SRS4213368	214656448	SRS4213368	A1	A01	_	DePCR	_	MT	_	45C	_	A	_	2	_	R1	.fastq	_1		A01_DePCR_MT_45C_A_2_R1.fastq	move SRS4213368_1.fastq renamed/A01_DePCR_MT_45C_A_2_R1.fastq
A1-45-2	SRS4213368	214656448	SRS4213368	A1	A01	_	DePCR	_	MT	_	45C	_	A	_	2	_	R2	.fastq	_2		A01_DePCR_MT_45C_A_2_R2.fastq	move SRS4213368_2.fastq renamed/A01_DePCR_MT_45C_A_2_R2.fastq
A1-45-3	SRS4213453	214657444	SRS4213453	A1	A01	_	DePCR	_	MT	_	45C	_	A	_	3	_	R1	.fastq	_1		A01_DePCR_MT_45C_A_3_R1.fastq	move SRS4213453_1.fastq renamed/A01_DePCR_MT_45C_A_3_R1.fastq
A1-45-3	SRS4213453	214657444	SRS4213453	A1	A01	_	DePCR	_	MT	_	45C	_	A	_	3	_	R2	.fastq	_2		A01_DePCR_MT_45C_A_3_R2.fastq	move SRS4213453_2.fastq renamed/A01_DePCR_MT_45C_A_3_R2.fastq
A1-45-4	SRS4213452	214639438	SRS4213452	A1	A01	_	DePCR	_	MT	_	45C	_	A	_	4	_	R1	.fastq	_1		A01_DePCR_MT_45C_A_4_R1.fastq	move SRS4213452_1.fastq renamed/A01_DePCR_MT_45C_A_4_R1.fastq
A1-45-4	SRS4213452	214639438	SRS4213452	A1	A01	_	DePCR	_	MT	_	45C	_	A	_	4	_	R2	.fastq	_2		A01_DePCR_MT_45C_A_4_R2.fastq	move SRS4213452_2.fastq renamed/A01_DePCR_MT_45C_A_4_R2.fastq
A1-45-5	SRS4213447	214639439	SRS4213447	A1	A01	_	DePCR	_	MT	_	45C	_	A	_	5	_	R1	.fastq	_1		A01_DePCR_MT_45C_A_5_R1.fastq	move SRS4213447_1.fastq renamed/A01_DePCR_MT_45C_A_5_R1.fastq
A1-45-5	SRS4213447	214639439	SRS4213447	A1	A01	_	DePCR	_	MT	_	45C	_	A	_	5	_	R2	.fastq	_2		A01_DePCR_MT_45C_A_5_R2.fastq	move SRS4213447_2.fastq renamed/A01_DePCR_MT_45C_A_5_R2.fastq
A1-45-6	SRS4213446	214639440	SRS4213446	A1	A01	_	DePCR	_	MT	_	45C	_	A	_	6	_	R1	.fastq	_1		A01_DePCR_MT_45C_A_6_R1.fastq	move SRS4213446_1.fastq renamed/A01_DePCR_MT_45C_A_6_R1.fastq
A1-45-6	SRS4213446	214639440	SRS4213446	A1	A01	_	DePCR	_	MT	_	45C	_	A	_	6	_	R2	.fastq	_2		A01_DePCR_MT_45C_A_6_R2.fastq	move SRS4213446_2.fastq renamed/A01_DePCR_MT_45C_A_6_R2.fastq
A1-45-7	SRS4213449	214651443	SRS4213449	A1	A01	_	DePCR	_	MT	_	45C	_	A	_	7	_	R1	.fastq	_1		A01_DePCR_MT_45C_A_7_R1.fastq	move SRS4213449_1.fastq renamed/A01_DePCR_MT_45C_A_7_R1.fastq
A1-45-7	SRS4213449	214651443	SRS4213449	A1	A01	_	DePCR	_	MT	_	45C	_	A	_	7	_	R2	.fastq	_2		A01_DePCR_MT_45C_A_7_R2.fastq	move SRS4213449_2.fastq renamed/A01_DePCR_MT_45C_A_7_R2.fastq
A1-45-8	SRS4213448	214645438	SRS4213448	A1	A01	_	DePCR	_	MT	_	45C	_	A	_	8	_	R1	.fastq	_1		A01_DePCR_MT_45C_A_8_R1.fastq	move SRS4213448_1.fastq renamed/A01_DePCR_MT_45C_A_8_R1.fastq
A1-45-8	SRS4213448	214645438	SRS4213448	A1	A01	_	DePCR	_	MT	_	45C	_	A	_	8	_	R2	.fastq	_2		A01_DePCR_MT_45C_A_8_R2.fastq	move SRS4213448_2.fastq renamed/A01_DePCR_MT_45C_A_8_R2.fastq
A1-55-1	SRS4213374	214653458	SRS4213374	A1	A01	_	DePCR	_	MT	_	55C	_	A	_	1	_	R1	.fastq	_1		A01_DePCR_MT_55C_A_1_R1.fastq	move SRS4213374_1.fastq renamed/A01_DePCR_MT_55C_A_1_R1.fastq
A1-55-1	SRS4213374	214653458	SRS4213374	A1	A01	_	DePCR	_	MT	_	55C	_	A	_	1	_	R2	.fastq	_2		A01_DePCR_MT_55C_A_1_R2.fastq	move SRS4213374_2.fastq renamed/A01_DePCR_MT_55C_A_1_R2.fastq
A1-55-2	SRS4213373	214651458	SRS4213373	A1	A01	_	DePCR	_	MT	_	55C	_	A	_	2	_	R1	.fastq	_1		A01_DePCR_MT_55C_A_2_R1.fastq	move SRS4213373_1.fastq renamed/A01_DePCR_MT_55C_A_2_R1.fastq
A1-55-2	SRS4213373	214651458	SRS4213373	A1	A01	_	DePCR	_	MT	_	55C	_	A	_	2	_	R2	.fastq	_2		A01_DePCR_MT_55C_A_2_R2.fastq	move SRS4213373_2.fastq renamed/A01_DePCR_MT_55C_A_2_R2.fastq
A1-55-3	SRS4213695	214662464	SRS4213695	A1	A01	_	DePCR	_	MT	_	55C	_	A	_	3	_	R1	.fastq	_1		A01_DePCR_MT_55C_A_3_R1.fastq	move SRS4213695_1.fastq renamed/A01_DePCR_MT_55C_A_3_R1.fastq
A1-55-3	SRS4213695	214662464	SRS4213695	A1	A01	_	DePCR	_	MT	_	55C	_	A	_	3	_	R2	.fastq	_2		A01_DePCR_MT_55C_A_3_R2.fastq	move SRS4213695_2.fastq renamed/A01_DePCR_MT_55C_A_3_R2.fastq
A1-55-4	SRS4213694	214644447	SRS4213694	A1	A01	_	DePCR	_	MT	_	55C	_	A	_	4	_	R1	.fastq	_1		A01_DePCR_MT_55C_A_4_R1.fastq	move SRS4213694_1.fastq renamed/A01_DePCR_MT_55C_A_4_R1.fastq
A1-55-4	SRS4213694	214644447	SRS4213694	A1	A01	_	DePCR	_	MT	_	55C	_	A	_	4	_	R2	.fastq	_2		A01_DePCR_MT_55C_A_4_R2.fastq	move SRS4213694_2.fastq renamed/A01_DePCR_MT_55C_A_4_R2.fastq
A1-55-5	SRS4213697	214644448	SRS4213697	A1	A01	_	DePCR	_	MT	_	55C	_	A	_	5	_	R1	.fastq	_1		A01_DePCR_MT_55C_A_5_R1.fastq	move SRS4213697_1.fastq renamed/A01_DePCR_MT_55C_A_5_R1.fastq
A1-55-5	SRS4213697	214644448	SRS4213697	A1	A01	_	DePCR	_	MT	_	55C	_	A	_	5	_	R2	.fastq	_2		A01_DePCR_MT_55C_A_5_R2.fastq	move SRS4213697_2.fastq renamed/A01_DePCR_MT_55C_A_5_R2.fastq
A1-55-6	SRS4213696	214644449	SRS4213696	A1	A01	_	DePCR	_	MT	_	55C	_	A	_	6	_	R1	.fastq	_1		A01_DePCR_MT_55C_A_6_R1.fastq	move SRS4213696_1.fastq renamed/A01_DePCR_MT_55C_A_6_R1.fastq
A1-55-6	SRS4213696	214644449	SRS4213696	A1	A01	_	DePCR	_	MT	_	55C	_	A	_	6	_	R2	.fastq	_2		A01_DePCR_MT_55C_A_6_R2.fastq	move SRS4213696_2.fastq renamed/A01_DePCR_MT_55C_A_6_R2.fastq
A1-55-7	SRS4213691	214661471	SRS4213691	A1	A01	_	DePCR	_	MT	_	55C	_	A	_	7	_	R1	.fastq	_1		A01_DePCR_MT_55C_A_7_R1.fastq	move SRS4213691_1.fastq renamed/A01_DePCR_MT_55C_A_7_R1.fastq
A1-55-7	SRS4213691	214661471	SRS4213691	A1	A01	_	DePCR	_	MT	_	55C	_	A	_	7	_	R2	.fastq	_2		A01_DePCR_MT_55C_A_7_R2.fastq	move SRS4213691_2.fastq renamed/A01_DePCR_MT_55C_A_7_R2.fastq
A1-55-8	SRS4213690	214645450	SRS4213690	A1	A01	_	DePCR	_	MT	_	55C	_	A	_	8	_	R1	.fastq	_1		A01_DePCR_MT_55C_A_8_R1.fastq	move SRS4213690_1.fastq renamed/A01_DePCR_MT_55C_A_8_R1.fastq
A1-55-8	SRS4213690	214645450	SRS4213690	A1	A01	_	DePCR	_	MT	_	55C	_	A	_	8	_	R2	.fastq	_2		A01_DePCR_MT_55C_A_8_R2.fastq	move SRS4213690_2.fastq renamed/A01_DePCR_MT_55C_A_8_R2.fastq
QB-DePCR-45-01_S134_L001_R1_001.fastq.gz	#N/A	QB-DePCR-45-01_S134_L001_R1_001.fastq.gz	QB-DePCR-45-01_S134_L001_R1_001.fastq.gz	A1	A01	_	DePCR	_	QB	_	45C	_	A	_	1	_	R1	.fastq.gz	_1		A01_DePCR_QB_45C_A_1_R1.fastq.gz	move QB-DePCR-45-01_S134_L001_R1_001.fastq.gz renamed/A01_DePCR_QB_45C_A_1_R1.fastq.gz
QB-DePCR-45-01_S134_L001_R2_001.fastq.gz	#N/A	QB-DePCR-45-01_S134_L001_R2_001.fastq.gz	QB-DePCR-45-01_S134_L001_R2_001.fastq.gz	A1	A01	_	DePCR	_	QB	_	45C	_	A	_	1	_	R2	.fastq.gz	_2		A01_DePCR_QB_45C_A_1_R2.fastq.gz	move QB-DePCR-45-01_S134_L001_R2_001.fastq.gz renamed/A01_DePCR_QB_45C_A_1_R2.fastq.gz
QB-DePCR-45-02_S135_L001_R1_001.fastq.gz	#N/A	QB-DePCR-45-02_S135_L001_R1_001.fastq.gz	QB-DePCR-45-02_S135_L001_R1_001.fastq.gz	A1	A01	_	DePCR	_	QB	_	45C	_	A	_	2	_	R1	.fastq.gz	_1		A01_DePCR_QB_45C_A_2_R1.fastq.gz	move QB-DePCR-45-02_S135_L001_R1_001.fastq.gz renamed/A01_DePCR_QB_45C_A_2_R1.fastq.gz
QB-DePCR-45-02_S135_L001_R2_001.fastq.gz	#N/A	QB-DePCR-45-02_S135_L001_R2_001.fastq.gz	QB-DePCR-45-02_S135_L001_R2_001.fastq.gz	A1	A01	_	DePCR	_	QB	_	45C	_	A	_	2	_	R2	.fastq.gz	_2		A01_DePCR_QB_45C_A_2_R2.fastq.gz	move QB-DePCR-45-02_S135_L001_R2_001.fastq.gz renamed/A01_DePCR_QB_45C_A_2_R2.fastq.gz
QB-DePCR-45-03_S136_L001_R1_001.fastq.gz	#N/A	QB-DePCR-45-03_S136_L001_R1_001.fastq.gz	QB-DePCR-45-03_S136_L001_R1_001.fastq.gz	A1	A01	_	DePCR	_	QB	_	45C	_	A	_	3	_	R1	.fastq.gz	_1		A01_DePCR_QB_45C_A_3_R1.fastq.gz	move QB-DePCR-45-03_S136_L001_R1_001.fastq.gz renamed/A01_DePCR_QB_45C_A_3_R1.fastq.gz
QB-DePCR-45-03_S136_L001_R2_001.fastq.gz	#N/A	QB-DePCR-45-03_S136_L001_R2_001.fastq.gz	QB-DePCR-45-03_S136_L001_R2_001.fastq.gz	A1	A01	_	DePCR	_	QB	_	45C	_	A	_	3	_	R2	.fastq.gz	_2		A01_DePCR_QB_45C_A_3_R2.fastq.gz	move QB-DePCR-45-03_S136_L001_R2_001.fastq.gz renamed/A01_DePCR_QB_45C_A_3_R2.fastq.gz
QB-DePCR-45-04_S137_L001_R1_001.fastq.gz	#N/A	QB-DePCR-45-04_S137_L001_R1_001.fastq.gz	QB-DePCR-45-04_S137_L001_R1_001.fastq.gz	A1	A01	_	DePCR	_	QB	_	45C	_	A	_	4	_	R1	.fastq.gz	_1		A01_DePCR_QB_45C_A_4_R1.fastq.gz	move QB-DePCR-45-04_S137_L001_R1_001.fastq.gz renamed/A01_DePCR_QB_45C_A_4_R1.fastq.gz
QB-DePCR-45-04_S137_L001_R2_001.fastq.gz	#N/A	QB-DePCR-45-04_S137_L001_R2_001.fastq.gz	QB-DePCR-45-04_S137_L001_R2_001.fastq.gz	A1	A01	_	DePCR	_	QB	_	45C	_	A	_	4	_	R2	.fastq.gz	_2		A01_DePCR_QB_45C_A_4_R2.fastq.gz	move QB-DePCR-45-04_S137_L001_R2_001.fastq.gz renamed/A01_DePCR_QB_45C_A_4_R2.fastq.gz
QB-DePCR-45-05_S138_L001_R1_001.fastq.gz	#N/A	QB-DePCR-45-05_S138_L001_R1_001.fastq.gz	QB-DePCR-45-05_S138_L001_R1_001.fastq.gz	A1	A01	_	DePCR	_	QB	_	45C	_	A	_	5	_	R1	.fastq.gz	_1		A01_DePCR_QB_45C_A_5_R1.fastq.gz	move QB-DePCR-45-05_S138_L001_R1_001.fastq.gz renamed/A01_DePCR_QB_45C_A_5_R1.fastq.gz
QB-DePCR-45-05_S138_L001_R2_001.fastq.gz	#N/A	QB-DePCR-45-05_S138_L001_R2_001.fastq.gz	QB-DePCR-45-05_S138_L001_R2_001.fastq.gz	A1	A01	_	DePCR	_	QB	_	45C	_	A	_	5	_	R2	.fastq.gz	_2		A01_DePCR_QB_45C_A_5_R2.fastq.gz	move QB-DePCR-45-05_S138_L001_R2_001.fastq.gz renamed/A01_DePCR_QB_45C_A_5_R2.fastq.gz
QB-DePCR-45-06_S139_L001_R1_001.fastq.gz	#N/A	QB-DePCR-45-06_S139_L001_R1_001.fastq.gz	QB-DePCR-45-06_S139_L001_R1_001.fastq.gz	A1	A01	_	DePCR	_	QB	_	45C	_	A	_	6	_	R1	.fastq.gz	_1		A01_DePCR_QB_45C_A_6_R1.fastq.gz	move QB-DePCR-45-06_S139_L001_R1_001.fastq.gz renamed/A01_DePCR_QB_45C_A_6_R1.fastq.gz
QB-DePCR-45-06_S139_L001_R2_001.fastq.gz	#N/A	QB-DePCR-45-06_S139_L001_R2_001.fastq.gz	QB-DePCR-45-06_S139_L001_R2_001.fastq.gz	A1	A01	_	DePCR	_	QB	_	45C	_	A	_	6	_	R2	.fastq.gz	_2		A01_DePCR_QB_45C_A_6_R2.fastq.gz	move QB-DePCR-45-06_S139_L001_R2_001.fastq.gz renamed/A01_DePCR_QB_45C_A_6_R2.fastq.gz
QB-DePCR-45-07_S140_L001_R1_001.fastq.gz	#N/A	QB-DePCR-45-07_S140_L001_R1_001.fastq.gz	QB-DePCR-45-07_S140_L001_R1_001.fastq.gz	A1	A01	_	DePCR	_	QB	_	45C	_	A	_	7	_	R1	.fastq.gz	_1		A01_DePCR_QB_45C_A_7_R1.fastq.gz	move QB-DePCR-45-07_S140_L001_R1_001.fastq.gz renamed/A01_DePCR_QB_45C_A_7_R1.fastq.gz
QB-DePCR-45-07_S140_L001_R2_001.fastq.gz	#N/A	QB-DePCR-45-07_S140_L001_R2_001.fastq.gz	QB-DePCR-45-07_S140_L001_R2_001.fastq.gz	A1	A01	_	DePCR	_	QB	_	45C	_	A	_	7	_	R2	.fastq.gz	_2		A01_DePCR_QB_45C_A_7_R2.fastq.gz	move QB-DePCR-45-07_S140_L001_R2_001.fastq.gz renamed/A01_DePCR_QB_45C_A_7_R2.fastq.gz
QB-DePCR-45-08_S141_L001_R1_001.fastq.gz	#N/A	QB-DePCR-45-08_S141_L001_R1_001.fastq.gz	QB-DePCR-45-08_S141_L001_R1_001.fastq.gz	A1	A01	_	DePCR	_	QB	_	45C	_	A	_	8	_	R1	.fastq.gz	_1		A01_DePCR_QB_45C_A_8_R1.fastq.gz	move QB-DePCR-45-08_S141_L001_R1_001.fastq.gz renamed/A01_DePCR_QB_45C_A_8_R1.fastq.gz
QB-DePCR-45-08_S141_L001_R2_001.fastq.gz	#N/A	QB-DePCR-45-08_S141_L001_R2_001.fastq.gz	QB-DePCR-45-08_S141_L001_R2_001.fastq.gz	A1	A01	_	DePCR	_	QB	_	45C	_	A	_	8	_	R2	.fastq.gz	_2		A01_DePCR_QB_45C_A_8_R2.fastq.gz	move QB-DePCR-45-08_S141_L001_R2_001.fastq.gz renamed/A01_DePCR_QB_45C_A_8_R2.fastq.gz
QB-DePCR-55-01_S142_L001_R1_001.fastq.gz	#N/A	QB-DePCR-55-01_S142_L001_R1_001.fastq.gz	QB-DePCR-55-01_S142_L001_R1_001.fastq.gz	A1	A01	_	DePCR	_	QB	_	55C	_	A	_	1	_	R1	.fastq.gz	_1		A01_DePCR_QB_55C_A_1_R1.fastq.gz	move QB-DePCR-55-01_S142_L001_R1_001.fastq.gz renamed/A01_DePCR_QB_55C_A_1_R1.fastq.gz
QB-DePCR-55-01_S142_L001_R2_001.fastq.gz	#N/A	QB-DePCR-55-01_S142_L001_R2_001.fastq.gz	QB-DePCR-55-01_S142_L001_R2_001.fastq.gz	A1	A01	_	DePCR	_	QB	_	55C	_	A	_	1	_	R2	.fastq.gz	_2		A01_DePCR_QB_55C_A_1_R2.fastq.gz	move QB-DePCR-55-01_S142_L001_R2_001.fastq.gz renamed/A01_DePCR_QB_55C_A_1_R2.fastq.gz
QB-DePCR-55-02_S143_L001_R1_001.fastq.gz	#N/A	QB-DePCR-55-02_S143_L001_R1_001.fastq.gz	QB-DePCR-55-02_S143_L001_R1_001.fastq.gz	A1	A01	_	DePCR	_	QB	_	55C	_	A	_	2	_	R1	.fastq.gz	_1		A01_DePCR_QB_55C_A_2_R1.fastq.gz	move QB-DePCR-55-02_S143_L001_R1_001.fastq.gz renamed/A01_DePCR_QB_55C_A_2_R1.fastq.gz
QB-DePCR-55-02_S143_L001_R2_001.fastq.gz	#N/A	QB-DePCR-55-02_S143_L001_R2_001.fastq.gz	QB-DePCR-55-02_S143_L001_R2_001.fastq.gz	A1	A01	_	DePCR	_	QB	_	55C	_	A	_	2	_	R2	.fastq.gz	_2		A01_DePCR_QB_55C_A_2_R2.fastq.gz	move QB-DePCR-55-02_S143_L001_R2_001.fastq.gz renamed/A01_DePCR_QB_55C_A_2_R2.fastq.gz
QB-DePCR-55-03_S144_L001_R1_001.fastq.gz	#N/A	QB-DePCR-55-03_S144_L001_R1_001.fastq.gz	QB-DePCR-55-03_S144_L001_R1_001.fastq.gz	A1	A01	_	DePCR	_	QB	_	55C	_	A	_	3	_	R1	.fastq.gz	_1		A01_DePCR_QB_55C_A_3_R1.fastq.gz	move QB-DePCR-55-03_S144_L001_R1_001.fastq.gz renamed/A01_DePCR_QB_55C_A_3_R1.fastq.gz
QB-DePCR-55-03_S144_L001_R2_001.fastq.gz	#N/A	QB-DePCR-55-03_S144_L001_R2_001.fastq.gz	QB-DePCR-55-03_S144_L001_R2_001.fastq.gz	A1	A01	_	DePCR	_	QB	_	55C	_	A	_	3	_	R2	.fastq.gz	_2		A01_DePCR_QB_55C_A_3_R2.fastq.gz	move QB-DePCR-55-03_S144_L001_R2_001.fastq.gz renamed/A01_DePCR_QB_55C_A_3_R2.fastq.gz
QB-DePCR-55-04_S145_L001_R1_001.fastq.gz	#N/A	QB-DePCR-55-04_S145_L001_R1_001.fastq.gz	QB-DePCR-55-04_S145_L001_R1_001.fastq.gz	A1	A01	_	DePCR	_	QB	_	55C	_	A	_	4	_	R1	.fastq.gz	_1		A01_DePCR_QB_55C_A_4_R1.fastq.gz	move QB-DePCR-55-04_S145_L001_R1_001.fastq.gz renamed/A01_DePCR_QB_55C_A_4_R1.fastq.gz
QB-DePCR-55-04_S145_L001_R2_001.fastq.gz	#N/A	QB-DePCR-55-04_S145_L001_R2_001.fastq.gz	QB-DePCR-55-04_S145_L001_R2_001.fastq.gz	A1	A01	_	DePCR	_	QB	_	55C	_	A	_	4	_	R2	.fastq.gz	_2		A01_DePCR_QB_55C_A_4_R2.fastq.gz	move QB-DePCR-55-04_S145_L001_R2_001.fastq.gz renamed/A01_DePCR_QB_55C_A_4_R2.fastq.gz
QB-DePCR-55-05_S146_L001_R1_001.fastq.gz	#N/A	QB-DePCR-55-05_S146_L001_R1_001.fastq.gz	QB-DePCR-55-05_S146_L001_R1_001.fastq.gz	A1	A01	_	DePCR	_	QB	_	55C	_	A	_	5	_	R1	.fastq.gz	_1		A01_DePCR_QB_55C_A_5_R1.fastq.gz	move QB-DePCR-55-05_S146_L001_R1_001.fastq.gz renamed/A01_DePCR_QB_55C_A_5_R1.fastq.gz
QB-DePCR-55-05_S146_L001_R2_001.fastq.gz	#N/A	QB-DePCR-55-05_S146_L001_R2_001.fastq.gz	QB-DePCR-55-05_S146_L001_R2_001.fastq.gz	A1	A01	_	DePCR	_	QB	_	55C	_	A	_	5	_	R2	.fastq.gz	_2		A01_DePCR_QB_55C_A_5_R2.fastq.gz	move QB-DePCR-55-05_S146_L001_R2_001.fastq.gz renamed/A01_DePCR_QB_55C_A_5_R2.fastq.gz
QB-DePCR-55-06_S147_L001_R1_001.fastq.gz	#N/A	QB-DePCR-55-06_S147_L001_R1_001.fastq.gz	QB-DePCR-55-06_S147_L001_R1_001.fastq.gz	A1	A01	_	DePCR	_	QB	_	55C	_	A	_	6	_	R1	.fastq.gz	_1		A01_DePCR_QB_55C_A_6_R1.fastq.gz	move QB-DePCR-55-06_S147_L001_R1_001.fastq.gz renamed/A01_DePCR_QB_55C_A_6_R1.fastq.gz
QB-DePCR-55-06_S147_L001_R2_001.fastq.gz	#N/A	QB-DePCR-55-06_S147_L001_R2_001.fastq.gz	QB-DePCR-55-06_S147_L001_R2_001.fastq.gz	A1	A01	_	DePCR	_	QB	_	55C	_	A	_	6	_	R2	.fastq.gz	_2		A01_DePCR_QB_55C_A_6_R2.fastq.gz	move QB-DePCR-55-06_S147_L001_R2_001.fastq.gz renamed/A01_DePCR_QB_55C_A_6_R2.fastq.gz
QB-DePCR-55-07_S148_L001_R1_001.fastq.gz	#N/A	QB-DePCR-55-07_S148_L001_R1_001.fastq.gz	QB-DePCR-55-07_S148_L001_R1_001.fastq.gz	A1	A01	_	DePCR	_	QB	_	55C	_	A	_	7	_	R1	.fastq.gz	_1		A01_DePCR_QB_55C_A_7_R1.fastq.gz	move QB-DePCR-55-07_S148_L001_R1_001.fastq.gz renamed/A01_DePCR_QB_55C_A_7_R1.fastq.gz
QB-DePCR-55-07_S148_L001_R2_001.fastq.gz	#N/A	QB-DePCR-55-07_S148_L001_R2_001.fastq.gz	QB-DePCR-55-07_S148_L001_R2_001.fastq.gz	A1	A01	_	DePCR	_	QB	_	55C	_	A	_	7	_	R2	.fastq.gz	_2		A01_DePCR_QB_55C_A_7_R2.fastq.gz	move QB-DePCR-55-07_S148_L001_R2_001.fastq.gz renamed/A01_DePCR_QB_55C_A_7_R2.fastq.gz
QB-DePCR-55-08_S149_L001_R1_001.fastq.gz	#N/A	QB-DePCR-55-08_S149_L001_R1_001.fastq.gz	QB-DePCR-55-08_S149_L001_R1_001.fastq.gz	A1	A01	_	DePCR	_	QB	_	55C	_	A	_	8	_	R1	.fastq.gz	_1		A01_DePCR_QB_55C_A_8_R1.fastq.gz	move QB-DePCR-55-08_S149_L001_R1_001.fastq.gz renamed/A01_DePCR_QB_55C_A_8_R1.fastq.gz
QB-DePCR-55-08_S149_L001_R2_001.fastq.gz	#N/A	QB-DePCR-55-08_S149_L001_R2_001.fastq.gz	QB-DePCR-55-08_S149_L001_R2_001.fastq.gz	A1	A01	_	DePCR	_	QB	_	55C	_	A	_	8	_	R2	.fastq.gz	_2		A01_DePCR_QB_55C_A_8_R2.fastq.gz	move QB-DePCR-55-08_S149_L001_R2_001.fastq.gz renamed/A01_DePCR_QB_55C_A_8_R2.fastq.gz
DT-PCR-45-01_S58_L001_R1_001.fastq.gz	#N/A	DT-PCR-45-01_S58_L001_R1_001.fastq.gz	DT-PCR-45-01_S58_L001_R1_001.fastq.gz	A1	A01	_	PCR	_	DT	_	45C	_	A	_	1	_	R1	.fastq.gz	_1		A01_PCR_DT_45C_A_1_R1.fastq.gz	move DT-PCR-45-01_S58_L001_R1_001.fastq.gz renamed/A01_PCR_DT_45C_A_1_R1.fastq.gz
DT-PCR-45-01_S58_L001_R2_001.fastq.gz	#N/A	DT-PCR-45-01_S58_L001_R2_001.fastq.gz	DT-PCR-45-01_S58_L001_R2_001.fastq.gz	A1	A01	_	PCR	_	DT	_	45C	_	A	_	1	_	R2	.fastq.gz	_2		A01_PCR_DT_45C_A_1_R2.fastq.gz	move DT-PCR-45-01_S58_L001_R2_001.fastq.gz renamed/A01_PCR_DT_45C_A_1_R2.fastq.gz
DT-PCR-45-02_S59_L001_R1_001.fastq.gz	#N/A	DT-PCR-45-02_S59_L001_R1_001.fastq.gz	DT-PCR-45-02_S59_L001_R1_001.fastq.gz	A1	A01	_	PCR	_	DT	_	45C	_	A	_	2	_	R1	.fastq.gz	_1		A01_PCR_DT_45C_A_2_R1.fastq.gz	move DT-PCR-45-02_S59_L001_R1_001.fastq.gz renamed/A01_PCR_DT_45C_A_2_R1.fastq.gz
DT-PCR-45-02_S59_L001_R2_001.fastq.gz	#N/A	DT-PCR-45-02_S59_L001_R2_001.fastq.gz	DT-PCR-45-02_S59_L001_R2_001.fastq.gz	A1	A01	_	PCR	_	DT	_	45C	_	A	_	2	_	R2	.fastq.gz	_2		A01_PCR_DT_45C_A_2_R2.fastq.gz	move DT-PCR-45-02_S59_L001_R2_001.fastq.gz renamed/A01_PCR_DT_45C_A_2_R2.fastq.gz
DT-PCR-45-03_S60_L001_R1_001.fastq.gz	#N/A	DT-PCR-45-03_S60_L001_R1_001.fastq.gz	DT-PCR-45-03_S60_L001_R1_001.fastq.gz	A1	A01	_	PCR	_	DT	_	45C	_	A	_	3	_	R1	.fastq.gz	_1		A01_PCR_DT_45C_A_3_R1.fastq.gz	move DT-PCR-45-03_S60_L001_R1_001.fastq.gz renamed/A01_PCR_DT_45C_A_3_R1.fastq.gz
DT-PCR-45-03_S60_L001_R2_001.fastq.gz	#N/A	DT-PCR-45-03_S60_L001_R2_001.fastq.gz	DT-PCR-45-03_S60_L001_R2_001.fastq.gz	A1	A01	_	PCR	_	DT	_	45C	_	A	_	3	_	R2	.fastq.gz	_2		A01_PCR_DT_45C_A_3_R2.fastq.gz	move DT-PCR-45-03_S60_L001_R2_001.fastq.gz renamed/A01_PCR_DT_45C_A_3_R2.fastq.gz
DT-PCR-45-04_S61_L001_R1_001.fastq.gz	#N/A	DT-PCR-45-04_S61_L001_R1_001.fastq.gz	DT-PCR-45-04_S61_L001_R1_001.fastq.gz	A1	A01	_	PCR	_	DT	_	45C	_	A	_	4	_	R1	.fastq.gz	_1		A01_PCR_DT_45C_A_4_R1.fastq.gz	move DT-PCR-45-04_S61_L001_R1_001.fastq.gz renamed/A01_PCR_DT_45C_A_4_R1.fastq.gz
DT-PCR-45-04_S61_L001_R2_001.fastq.gz	#N/A	DT-PCR-45-04_S61_L001_R2_001.fastq.gz	DT-PCR-45-04_S61_L001_R2_001.fastq.gz	A1	A01	_	PCR	_	DT	_	45C	_	A	_	4	_	R2	.fastq.gz	_2		A01_PCR_DT_45C_A_4_R2.fastq.gz	move DT-PCR-45-04_S61_L001_R2_001.fastq.gz renamed/A01_PCR_DT_45C_A_4_R2.fastq.gz
DT-PCR-45-05_S62_L001_R1_001.fastq.gz	#N/A	DT-PCR-45-05_S62_L001_R1_001.fastq.gz	DT-PCR-45-05_S62_L001_R1_001.fastq.gz	A1	A01	_	PCR	_	DT	_	45C	_	A	_	5	_	R1	.fastq.gz	_1		A01_PCR_DT_45C_A_5_R1.fastq.gz	move DT-PCR-45-05_S62_L001_R1_001.fastq.gz renamed/A01_PCR_DT_45C_A_5_R1.fastq.gz
DT-PCR-45-05_S62_L001_R2_001.fastq.gz	#N/A	DT-PCR-45-05_S62_L001_R2_001.fastq.gz	DT-PCR-45-05_S62_L001_R2_001.fastq.gz	A1	A01	_	PCR	_	DT	_	45C	_	A	_	5	_	R2	.fastq.gz	_2		A01_PCR_DT_45C_A_5_R2.fastq.gz	move DT-PCR-45-05_S62_L001_R2_001.fastq.gz renamed/A01_PCR_DT_45C_A_5_R2.fastq.gz
DT-PCR-45-06_S63_L001_R1_001.fastq.gz	#N/A	DT-PCR-45-06_S63_L001_R1_001.fastq.gz	DT-PCR-45-06_S63_L001_R1_001.fastq.gz	A1	A01	_	PCR	_	DT	_	45C	_	A	_	6	_	R1	.fastq.gz	_1		A01_PCR_DT_45C_A_6_R1.fastq.gz	move DT-PCR-45-06_S63_L001_R1_001.fastq.gz renamed/A01_PCR_DT_45C_A_6_R1.fastq.gz
DT-PCR-45-06_S63_L001_R2_001.fastq.gz	#N/A	DT-PCR-45-06_S63_L001_R2_001.fastq.gz	DT-PCR-45-06_S63_L001_R2_001.fastq.gz	A1	A01	_	PCR	_	DT	_	45C	_	A	_	6	_	R2	.fastq.gz	_2		A01_PCR_DT_45C_A_6_R2.fastq.gz	move DT-PCR-45-06_S63_L001_R2_001.fastq.gz renamed/A01_PCR_DT_45C_A_6_R2.fastq.gz
DT-PCR-45-07_S64_L001_R1_001.fastq.gz	#N/A	DT-PCR-45-07_S64_L001_R1_001.fastq.gz	DT-PCR-45-07_S64_L001_R1_001.fastq.gz	A1	A01	_	PCR	_	DT	_	45C	_	A	_	7	_	R1	.fastq.gz	_1		A01_PCR_DT_45C_A_7_R1.fastq.gz	move DT-PCR-45-07_S64_L001_R1_001.fastq.gz renamed/A01_PCR_DT_45C_A_7_R1.fastq.gz
DT-PCR-45-07_S64_L001_R2_001.fastq.gz	#N/A	DT-PCR-45-07_S64_L001_R2_001.fastq.gz	DT-PCR-45-07_S64_L001_R2_001.fastq.gz	A1	A01	_	PCR	_	DT	_	45C	_	A	_	7	_	R2	.fastq.gz	_2		A01_PCR_DT_45C_A_7_R2.fastq.gz	move DT-PCR-45-07_S64_L001_R2_001.fastq.gz renamed/A01_PCR_DT_45C_A_7_R2.fastq.gz
DT-PCR-45-08_S65_L001_R1_001.fastq.gz	#N/A	DT-PCR-45-08_S65_L001_R1_001.fastq.gz	DT-PCR-45-08_S65_L001_R1_001.fastq.gz	A1	A01	_	PCR	_	DT	_	45C	_	A	_	8	_	R1	.fastq.gz	_1		A01_PCR_DT_45C_A_8_R1.fastq.gz	move DT-PCR-45-08_S65_L001_R1_001.fastq.gz renamed/A01_PCR_DT_45C_A_8_R1.fastq.gz
DT-PCR-45-08_S65_L001_R2_001.fastq.gz	#N/A	DT-PCR-45-08_S65_L001_R2_001.fastq.gz	DT-PCR-45-08_S65_L001_R2_001.fastq.gz	A1	A01	_	PCR	_	DT	_	45C	_	A	_	8	_	R2	.fastq.gz	_2		A01_PCR_DT_45C_A_8_R2.fastq.gz	move DT-PCR-45-08_S65_L001_R2_001.fastq.gz renamed/A01_PCR_DT_45C_A_8_R2.fastq.gz
DT-PCR-55-01_S66_L001_R1_001.fastq.gz	#N/A	DT-PCR-55-01_S66_L001_R1_001.fastq.gz	DT-PCR-55-01_S66_L001_R1_001.fastq.gz	A1	A01	_	PCR	_	DT	_	55C	_	A	_	1	_	R1	.fastq.gz	_1		A01_PCR_DT_55C_A_1_R1.fastq.gz	move DT-PCR-55-01_S66_L001_R1_001.fastq.gz renamed/A01_PCR_DT_55C_A_1_R1.fastq.gz
DT-PCR-55-01_S66_L001_R2_001.fastq.gz	#N/A	DT-PCR-55-01_S66_L001_R2_001.fastq.gz	DT-PCR-55-01_S66_L001_R2_001.fastq.gz	A1	A01	_	PCR	_	DT	_	55C	_	A	_	1	_	R2	.fastq.gz	_2		A01_PCR_DT_55C_A_1_R2.fastq.gz	move DT-PCR-55-01_S66_L001_R2_001.fastq.gz renamed/A01_PCR_DT_55C_A_1_R2.fastq.gz
DT-PCR-55-02_S67_L001_R1_001.fastq.gz	#N/A	DT-PCR-55-02_S67_L001_R1_001.fastq.gz	DT-PCR-55-02_S67_L001_R1_001.fastq.gz	A1	A01	_	PCR	_	DT	_	55C	_	A	_	2	_	R1	.fastq.gz	_1		A01_PCR_DT_55C_A_2_R1.fastq.gz	move DT-PCR-55-02_S67_L001_R1_001.fastq.gz renamed/A01_PCR_DT_55C_A_2_R1.fastq.gz
DT-PCR-55-02_S67_L001_R2_001.fastq.gz	#N/A	DT-PCR-55-02_S67_L001_R2_001.fastq.gz	DT-PCR-55-02_S67_L001_R2_001.fastq.gz	A1	A01	_	PCR	_	DT	_	55C	_	A	_	2	_	R2	.fastq.gz	_2		A01_PCR_DT_55C_A_2_R2.fastq.gz	move DT-PCR-55-02_S67_L001_R2_001.fastq.gz renamed/A01_PCR_DT_55C_A_2_R2.fastq.gz
DT-PCR-55-03_S68_L001_R1_001.fastq.gz	#N/A	DT-PCR-55-03_S68_L001_R1_001.fastq.gz	DT-PCR-55-03_S68_L001_R1_001.fastq.gz	A1	A01	_	PCR	_	DT	_	55C	_	A	_	3	_	R1	.fastq.gz	_1		A01_PCR_DT_55C_A_3_R1.fastq.gz	move DT-PCR-55-03_S68_L001_R1_001.fastq.gz renamed/A01_PCR_DT_55C_A_3_R1.fastq.gz
DT-PCR-55-03_S68_L001_R2_001.fastq.gz	#N/A	DT-PCR-55-03_S68_L001_R2_001.fastq.gz	DT-PCR-55-03_S68_L001_R2_001.fastq.gz	A1	A01	_	PCR	_	DT	_	55C	_	A	_	3	_	R2	.fastq.gz	_2		A01_PCR_DT_55C_A_3_R2.fastq.gz	move DT-PCR-55-03_S68_L001_R2_001.fastq.gz renamed/A01_PCR_DT_55C_A_3_R2.fastq.gz
DT-PCR-55-04_S69_L001_R1_001.fastq.gz	#N/A	DT-PCR-55-04_S69_L001_R1_001.fastq.gz	DT-PCR-55-04_S69_L001_R1_001.fastq.gz	A1	A01	_	PCR	_	DT	_	55C	_	A	_	4	_	R1	.fastq.gz	_1		A01_PCR_DT_55C_A_4_R1.fastq.gz	move DT-PCR-55-04_S69_L001_R1_001.fastq.gz renamed/A01_PCR_DT_55C_A_4_R1.fastq.gz
DT-PCR-55-04_S69_L001_R2_001.fastq.gz	#N/A	DT-PCR-55-04_S69_L001_R2_001.fastq.gz	DT-PCR-55-04_S69_L001_R2_001.fastq.gz	A1	A01	_	PCR	_	DT	_	55C	_	A	_	4	_	R2	.fastq.gz	_2		A01_PCR_DT_55C_A_4_R2.fastq.gz	move DT-PCR-55-04_S69_L001_R2_001.fastq.gz renamed/A01_PCR_DT_55C_A_4_R2.fastq.gz
DT-PCR-55-05_S70_L001_R1_001.fastq.gz	#N/A	DT-PCR-55-05_S70_L001_R1_001.fastq.gz	DT-PCR-55-05_S70_L001_R1_001.fastq.gz	A1	A01	_	PCR	_	DT	_	55C	_	A	_	5	_	R1	.fastq.gz	_1		A01_PCR_DT_55C_A_5_R1.fastq.gz	move DT-PCR-55-05_S70_L001_R1_001.fastq.gz renamed/A01_PCR_DT_55C_A_5_R1.fastq.gz
DT-PCR-55-05_S70_L001_R2_001.fastq.gz	#N/A	DT-PCR-55-05_S70_L001_R2_001.fastq.gz	DT-PCR-55-05_S70_L001_R2_001.fastq.gz	A1	A01	_	PCR	_	DT	_	55C	_	A	_	5	_	R2	.fastq.gz	_2		A01_PCR_DT_55C_A_5_R2.fastq.gz	move DT-PCR-55-05_S70_L001_R2_001.fastq.gz renamed/A01_PCR_DT_55C_A_5_R2.fastq.gz
DT-PCR-55-06_S71_L001_R1_001.fastq.gz	#N/A	DT-PCR-55-06_S71_L001_R1_001.fastq.gz	DT-PCR-55-06_S71_L001_R1_001.fastq.gz	A1	A01	_	PCR	_	DT	_	55C	_	A	_	6	_	R1	.fastq.gz	_1		A01_PCR_DT_55C_A_6_R1.fastq.gz	move DT-PCR-55-06_S71_L001_R1_001.fastq.gz renamed/A01_PCR_DT_55C_A_6_R1.fastq.gz
DT-PCR-55-06_S71_L001_R2_001.fastq.gz	#N/A	DT-PCR-55-06_S71_L001_R2_001.fastq.gz	DT-PCR-55-06_S71_L001_R2_001.fastq.gz	A1	A01	_	PCR	_	DT	_	55C	_	A	_	6	_	R2	.fastq.gz	_2		A01_PCR_DT_55C_A_6_R2.fastq.gz	move DT-PCR-55-06_S71_L001_R2_001.fastq.gz renamed/A01_PCR_DT_55C_A_6_R2.fastq.gz
DT-PCR-55-07_S72_L001_R1_001.fastq.gz	#N/A	DT-PCR-55-07_S72_L001_R1_001.fastq.gz	DT-PCR-55-07_S72_L001_R1_001.fastq.gz	A1	A01	_	PCR	_	DT	_	55C	_	A	_	7	_	R1	.fastq.gz	_1		A01_PCR_DT_55C_A_7_R1.fastq.gz	move DT-PCR-55-07_S72_L001_R1_001.fastq.gz renamed/A01_PCR_DT_55C_A_7_R1.fastq.gz
DT-PCR-55-07_S72_L001_R2_001.fastq.gz	#N/A	DT-PCR-55-07_S72_L001_R2_001.fastq.gz	DT-PCR-55-07_S72_L001_R2_001.fastq.gz	A1	A01	_	PCR	_	DT	_	55C	_	A	_	7	_	R2	.fastq.gz	_2		A01_PCR_DT_55C_A_7_R2.fastq.gz	move DT-PCR-55-07_S72_L001_R2_001.fastq.gz renamed/A01_PCR_DT_55C_A_7_R2.fastq.gz
DT-PCR-55-08_S73_L001_R1_001.fastq.gz	#N/A	DT-PCR-55-08_S73_L001_R1_001.fastq.gz	DT-PCR-55-08_S73_L001_R1_001.fastq.gz	A1	A01	_	PCR	_	DT	_	55C	_	A	_	8	_	R1	.fastq.gz	_1		A01_PCR_DT_55C_A_8_R1.fastq.gz	move DT-PCR-55-08_S73_L001_R1_001.fastq.gz renamed/A01_PCR_DT_55C_A_8_R1.fastq.gz
DT-PCR-55-08_S73_L001_R2_001.fastq.gz	#N/A	DT-PCR-55-08_S73_L001_R2_001.fastq.gz	DT-PCR-55-08_S73_L001_R2_001.fastq.gz	A1	A01	_	PCR	_	DT	_	55C	_	A	_	8	_	R2	.fastq.gz	_2		A01_PCR_DT_55C_A_8_R2.fastq.gz	move DT-PCR-55-08_S73_L001_R2_001.fastq.gz renamed/A01_PCR_DT_55C_A_8_R2.fastq.gz
A1S-45-1	SRS4213364	217235192	SRS4213364	A1	A01	_	PCR	_	MT	_	45C	_	A	_	1	_	R1	.fastq	_1		A01_PCR_MT_45C_A_1_R1.fastq	move SRS4213364_1.fastq renamed/A01_PCR_MT_45C_A_1_R1.fastq
A1S-45-1	SRS4213364	217235192	SRS4213364	A1	A01	_	PCR	_	MT	_	45C	_	A	_	1	_	R2	.fastq	_2		A01_PCR_MT_45C_A_1_R2.fastq	move SRS4213364_2.fastq renamed/A01_PCR_MT_45C_A_1_R2.fastq
A1S-45-2	SRS4213365	217243134	SRS4213365	A1	A01	_	PCR	_	MT	_	45C	_	A	_	2	_	R1	.fastq	_1		A01_PCR_MT_45C_A_2_R1.fastq	move SRS4213365_1.fastq renamed/A01_PCR_MT_45C_A_2_R1.fastq
A1S-45-2	SRS4213365	217243134	SRS4213365	A1	A01	_	PCR	_	MT	_	45C	_	A	_	2	_	R2	.fastq	_2		A01_PCR_MT_45C_A_2_R2.fastq	move SRS4213365_2.fastq renamed/A01_PCR_MT_45C_A_2_R2.fastq
A1S-45-3	SRS4213369	217246043	SRS4213369	A1	A01	_	PCR	_	MT	_	45C	_	A	_	3	_	R1	.fastq	_1		A01_PCR_MT_45C_A_3_R1.fastq	move SRS4213369_1.fastq renamed/A01_PCR_MT_45C_A_3_R1.fastq
A1S-45-3	SRS4213369	217246043	SRS4213369	A1	A01	_	PCR	_	MT	_	45C	_	A	_	3	_	R2	.fastq	_2		A01_PCR_MT_45C_A_3_R2.fastq	move SRS4213369_2.fastq renamed/A01_PCR_MT_45C_A_3_R2.fastq
A1S-45-4	SRS4213370	217235194	SRS4213370	A1	A01	_	PCR	_	MT	_	45C	_	A	_	4	_	R1	.fastq	_1		A01_PCR_MT_45C_A_4_R1.fastq	move SRS4213370_1.fastq renamed/A01_PCR_MT_45C_A_4_R1.fastq
A1S-45-4	SRS4213370	217235194	SRS4213370	A1	A01	_	PCR	_	MT	_	45C	_	A	_	4	_	R2	.fastq	_2		A01_PCR_MT_45C_A_4_R2.fastq	move SRS4213370_2.fastq renamed/A01_PCR_MT_45C_A_4_R2.fastq
A1S-45-5	SRS4213299	217230264	SRS4213299	A1	A01	_	PCR	_	MT	_	45C	_	A	_	5	_	R1	.fastq	_1		A01_PCR_MT_45C_A_5_R1.fastq	move SRS4213299_1.fastq renamed/A01_PCR_MT_45C_A_5_R1.fastq
A1S-45-5	SRS4213299	217230264	SRS4213299	A1	A01	_	PCR	_	MT	_	45C	_	A	_	5	_	R2	.fastq	_2		A01_PCR_MT_45C_A_5_R2.fastq	move SRS4213299_2.fastq renamed/A01_PCR_MT_45C_A_5_R2.fastq
A1S-45-6	SRS4213298	217236201	SRS4213298	A1	A01	_	PCR	_	MT	_	45C	_	A	_	6	_	R1	.fastq	_1		A01_PCR_MT_45C_A_6_R1.fastq	move SRS4213298_1.fastq renamed/A01_PCR_MT_45C_A_6_R1.fastq
A1S-45-6	SRS4213298	217236201	SRS4213298	A1	A01	_	PCR	_	MT	_	45C	_	A	_	6	_	R2	.fastq	_2		A01_PCR_MT_45C_A_6_R2.fastq	move SRS4213298_2.fastq renamed/A01_PCR_MT_45C_A_6_R2.fastq
A1S-45-7	SRS4213297	217242129	SRS4213297	A1	A01	_	PCR	_	MT	_	45C	_	A	_	7	_	R1	.fastq	_1		A01_PCR_MT_45C_A_7_R1.fastq	move SRS4213297_1.fastq renamed/A01_PCR_MT_45C_A_7_R1.fastq
A1S-45-7	SRS4213297	217242129	SRS4213297	A1	A01	_	PCR	_	MT	_	45C	_	A	_	7	_	R2	.fastq	_2		A01_PCR_MT_45C_A_7_R2.fastq	move SRS4213297_2.fastq renamed/A01_PCR_MT_45C_A_7_R2.fastq
A1S-45-8	SRS4213296	217228282	SRS4213296	A1	A01	_	PCR	_	MT	_	45C	_	A	_	8	_	R1	.fastq	_1		A01_PCR_MT_45C_A_8_R1.fastq	move SRS4213296_1.fastq renamed/A01_PCR_MT_45C_A_8_R1.fastq
A1S-45-8	SRS4213296	217228282	SRS4213296	A1	A01	_	PCR	_	MT	_	45C	_	A	_	8	_	R2	.fastq	_2		A01_PCR_MT_45C_A_8_R2.fastq	move SRS4213296_2.fastq renamed/A01_PCR_MT_45C_A_8_R2.fastq
A1S-55-1	SRS4213303	217236213	SRS4213303	A1	A01	_	PCR	_	MT	_	55C	_	A	_	1	_	R1	.fastq	_1		A01_PCR_MT_55C_A_1_R1.fastq	move SRS4213303_1.fastq renamed/A01_PCR_MT_55C_A_1_R1.fastq
A1S-55-1	SRS4213303	217236213	SRS4213303	A1	A01	_	PCR	_	MT	_	55C	_	A	_	1	_	R2	.fastq	_2		A01_PCR_MT_55C_A_1_R2.fastq	move SRS4213303_2.fastq renamed/A01_PCR_MT_55C_A_1_R2.fastq
A1S-55-2	SRS4213301	217244131	SRS4213301	A1	A01	_	PCR	_	MT	_	55C	_	A	_	2	_	R1	.fastq	_1		A01_PCR_MT_55C_A_2_R1.fastq	move SRS4213301_1.fastq renamed/A01_PCR_MT_55C_A_2_R1.fastq
A1S-55-2	SRS4213301	217244131	SRS4213301	A1	A01	_	PCR	_	MT	_	55C	_	A	_	2	_	R2	.fastq	_2		A01_PCR_MT_55C_A_2_R2.fastq	move SRS4213301_2.fastq renamed/A01_PCR_MT_55C_A_2_R2.fastq
A1S-55-3	SRS4213302	217245129	SRS4213302	A1	A01	_	PCR	_	MT	_	55C	_	A	_	3	_	R1	.fastq	_1		A01_PCR_MT_55C_A_3_R1.fastq	move SRS4213302_1.fastq renamed/A01_PCR_MT_55C_A_3_R1.fastq
A1S-55-3	SRS4213302	217245129	SRS4213302	A1	A01	_	PCR	_	MT	_	55C	_	A	_	3	_	R2	.fastq	_2		A01_PCR_MT_55C_A_3_R2.fastq	move SRS4213302_2.fastq renamed/A01_PCR_MT_55C_A_3_R2.fastq
A1S-55-4	SRS4213300	217236214	SRS4213300	A1	A01	_	PCR	_	MT	_	55C	_	A	_	4	_	R1	.fastq	_1		A01_PCR_MT_55C_A_4_R1.fastq	move SRS4213300_1.fastq renamed/A01_PCR_MT_55C_A_4_R1.fastq
A1S-55-4	SRS4213300	217236214	SRS4213300	A1	A01	_	PCR	_	MT	_	55C	_	A	_	4	_	R2	.fastq	_2		A01_PCR_MT_55C_A_4_R2.fastq	move SRS4213300_2.fastq renamed/A01_PCR_MT_55C_A_4_R2.fastq
A1S-55-5	SRS4213295	217232229	SRS4213295	A1	A01	_	PCR	_	MT	_	55C	_	A	_	5	_	R1	.fastq	_1		A01_PCR_MT_55C_A_5_R1.fastq	move SRS4213295_1.fastq renamed/A01_PCR_MT_55C_A_5_R1.fastq
A1S-55-5	SRS4213295	217232229	SRS4213295	A1	A01	_	PCR	_	MT	_	55C	_	A	_	5	_	R2	.fastq	_2		A01_PCR_MT_55C_A_5_R2.fastq	move SRS4213295_2.fastq renamed/A01_PCR_MT_55C_A_5_R2.fastq
A1S-55-6	SRS4213294	217231267	SRS4213294	A1	A01	_	PCR	_	MT	_	55C	_	A	_	6	_	R1	.fastq	_1		A01_PCR_MT_55C_A_6_R1.fastq	move SRS4213294_1.fastq renamed/A01_PCR_MT_55C_A_6_R1.fastq
A1S-55-6	SRS4213294	217231267	SRS4213294	A1	A01	_	PCR	_	MT	_	55C	_	A	_	6	_	R2	.fastq	_2		A01_PCR_MT_55C_A_6_R2.fastq	move SRS4213294_2.fastq renamed/A01_PCR_MT_55C_A_6_R2.fastq
A1S-55-7	SRS4213666	217228293	SRS4213666	A1	A01	_	PCR	_	MT	_	55C	_	A	_	7	_	R1	.fastq	_1		A01_PCR_MT_55C_A_7_R1.fastq	move SRS4213666_1.fastq renamed/A01_PCR_MT_55C_A_7_R1.fastq
A1S-55-7	SRS4213666	217228293	SRS4213666	A1	A01	_	PCR	_	MT	_	55C	_	A	_	7	_	R2	.fastq	_2		A01_PCR_MT_55C_A_7_R2.fastq	move SRS4213666_2.fastq renamed/A01_PCR_MT_55C_A_7_R2.fastq
A1S-55-8	SRS4213667	217248036	SRS4213667	A1	A01	_	PCR	_	MT	_	55C	_	A	_	8	_	R1	.fastq	_1		A01_PCR_MT_55C_A_8_R1.fastq	move SRS4213667_1.fastq renamed/A01_PCR_MT_55C_A_8_R1.fastq
A1S-55-8	SRS4213667	217248036	SRS4213667	A1	A01	_	PCR	_	MT	_	55C	_	A	_	8	_	R2	.fastq	_2		A01_PCR_MT_55C_A_8_R2.fastq	move SRS4213667_2.fastq renamed/A01_PCR_MT_55C_A_8_R2.fastq
QB-PCR-45-01_S74_L001_R1_001.fastq.gz	#N/A	QB-PCR-45-01_S74_L001_R1_001.fastq.gz	QB-PCR-45-01_S74_L001_R1_001.fastq.gz	A1	A01	_	PCR	_	QB	_	45C	_	A	_	1	_	R1	.fastq.gz	_1		A01_PCR_QB_45C_A_1_R1.fastq.gz	move QB-PCR-45-01_S74_L001_R1_001.fastq.gz renamed/A01_PCR_QB_45C_A_1_R1.fastq.gz
QB-PCR-45-01_S74_L001_R2_001.fastq.gz	#N/A	QB-PCR-45-01_S74_L001_R2_001.fastq.gz	QB-PCR-45-01_S74_L001_R2_001.fastq.gz	A1	A01	_	PCR	_	QB	_	45C	_	A	_	1	_	R2	.fastq.gz	_2		A01_PCR_QB_45C_A_1_R2.fastq.gz	move QB-PCR-45-01_S74_L001_R2_001.fastq.gz renamed/A01_PCR_QB_45C_A_1_R2.fastq.gz
QB-PCR-45-02_S75_L001_R1_001.fastq.gz	#N/A	QB-PCR-45-02_S75_L001_R1_001.fastq.gz	QB-PCR-45-02_S75_L001_R1_001.fastq.gz	A1	A01	_	PCR	_	QB	_	45C	_	A	_	2	_	R1	.fastq.gz	_1		A01_PCR_QB_45C_A_2_R1.fastq.gz	move QB-PCR-45-02_S75_L001_R1_001.fastq.gz renamed/A01_PCR_QB_45C_A_2_R1.fastq.gz
QB-PCR-45-02_S75_L001_R2_001.fastq.gz	#N/A	QB-PCR-45-02_S75_L001_R2_001.fastq.gz	QB-PCR-45-02_S75_L001_R2_001.fastq.gz	A1	A01	_	PCR	_	QB	_	45C	_	A	_	2	_	R2	.fastq.gz	_2		A01_PCR_QB_45C_A_2_R2.fastq.gz	move QB-PCR-45-02_S75_L001_R2_001.fastq.gz renamed/A01_PCR_QB_45C_A_2_R2.fastq.gz
QB-PCR-45-03_S76_L001_R1_001.fastq.gz	#N/A	QB-PCR-45-03_S76_L001_R1_001.fastq.gz	QB-PCR-45-03_S76_L001_R1_001.fastq.gz	A1	A01	_	PCR	_	QB	_	45C	_	A	_	3	_	R1	.fastq.gz	_1		A01_PCR_QB_45C_A_3_R1.fastq.gz	move QB-PCR-45-03_S76_L001_R1_001.fastq.gz renamed/A01_PCR_QB_45C_A_3_R1.fastq.gz
QB-PCR-45-03_S76_L001_R2_001.fastq.gz	#N/A	QB-PCR-45-03_S76_L001_R2_001.fastq.gz	QB-PCR-45-03_S76_L001_R2_001.fastq.gz	A1	A01	_	PCR	_	QB	_	45C	_	A	_	3	_	R2	.fastq.gz	_2		A01_PCR_QB_45C_A_3_R2.fastq.gz	move QB-PCR-45-03_S76_L001_R2_001.fastq.gz renamed/A01_PCR_QB_45C_A_3_R2.fastq.gz
QB-PCR-45-04_S77_L001_R1_001.fastq.gz	#N/A	QB-PCR-45-04_S77_L001_R1_001.fastq.gz	QB-PCR-45-04_S77_L001_R1_001.fastq.gz	A1	A01	_	PCR	_	QB	_	45C	_	A	_	4	_	R1	.fastq.gz	_1		A01_PCR_QB_45C_A_4_R1.fastq.gz	move QB-PCR-45-04_S77_L001_R1_001.fastq.gz renamed/A01_PCR_QB_45C_A_4_R1.fastq.gz
QB-PCR-45-04_S77_L001_R2_001.fastq.gz	#N/A	QB-PCR-45-04_S77_L001_R2_001.fastq.gz	QB-PCR-45-04_S77_L001_R2_001.fastq.gz	A1	A01	_	PCR	_	QB	_	45C	_	A	_	4	_	R2	.fastq.gz	_2		A01_PCR_QB_45C_A_4_R2.fastq.gz	move QB-PCR-45-04_S77_L001_R2_001.fastq.gz renamed/A01_PCR_QB_45C_A_4_R2.fastq.gz
QB-PCR-45-05_S78_L001_R1_001.fastq.gz	#N/A	QB-PCR-45-05_S78_L001_R1_001.fastq.gz	QB-PCR-45-05_S78_L001_R1_001.fastq.gz	A1	A01	_	PCR	_	QB	_	45C	_	A	_	5	_	R1	.fastq.gz	_1		A01_PCR_QB_45C_A_5_R1.fastq.gz	move QB-PCR-45-05_S78_L001_R1_001.fastq.gz renamed/A01_PCR_QB_45C_A_5_R1.fastq.gz
QB-PCR-45-05_S78_L001_R2_001.fastq.gz	#N/A	QB-PCR-45-05_S78_L001_R2_001.fastq.gz	QB-PCR-45-05_S78_L001_R2_001.fastq.gz	A1	A01	_	PCR	_	QB	_	45C	_	A	_	5	_	R2	.fastq.gz	_2		A01_PCR_QB_45C_A_5_R2.fastq.gz	move QB-PCR-45-05_S78_L001_R2_001.fastq.gz renamed/A01_PCR_QB_45C_A_5_R2.fastq.gz
QB-PCR-45-06_S79_L001_R1_001.fastq.gz	#N/A	QB-PCR-45-06_S79_L001_R1_001.fastq.gz	QB-PCR-45-06_S79_L001_R1_001.fastq.gz	A1	A01	_	PCR	_	QB	_	45C	_	A	_	6	_	R1	.fastq.gz	_1		A01_PCR_QB_45C_A_6_R1.fastq.gz	move QB-PCR-45-06_S79_L001_R1_001.fastq.gz renamed/A01_PCR_QB_45C_A_6_R1.fastq.gz
QB-PCR-45-06_S79_L001_R2_001.fastq.gz	#N/A	QB-PCR-45-06_S79_L001_R2_001.fastq.gz	QB-PCR-45-06_S79_L001_R2_001.fastq.gz	A1	A01	_	PCR	_	QB	_	45C	_	A	_	6	_	R2	.fastq.gz	_2		A01_PCR_QB_45C_A_6_R2.fastq.gz	move QB-PCR-45-06_S79_L001_R2_001.fastq.gz renamed/A01_PCR_QB_45C_A_6_R2.fastq.gz
QB-PCR-45-07_S80_L001_R1_001.fastq.gz	#N/A	QB-PCR-45-07_S80_L001_R1_001.fastq.gz	QB-PCR-45-07_S80_L001_R1_001.fastq.gz	A1	A01	_	PCR	_	QB	_	45C	_	A	_	7	_	R1	.fastq.gz	_1		A01_PCR_QB_45C_A_7_R1.fastq.gz	move QB-PCR-45-07_S80_L001_R1_001.fastq.gz renamed/A01_PCR_QB_45C_A_7_R1.fastq.gz
QB-PCR-45-07_S80_L001_R2_001.fastq.gz	#N/A	QB-PCR-45-07_S80_L001_R2_001.fastq.gz	QB-PCR-45-07_S80_L001_R2_001.fastq.gz	A1	A01	_	PCR	_	QB	_	45C	_	A	_	7	_	R2	.fastq.gz	_2		A01_PCR_QB_45C_A_7_R2.fastq.gz	move QB-PCR-45-07_S80_L001_R2_001.fastq.gz renamed/A01_PCR_QB_45C_A_7_R2.fastq.gz
QB-PCR-45-08_S81_L001_R1_001.fastq.gz	#N/A	QB-PCR-45-08_S81_L001_R1_001.fastq.gz	QB-PCR-45-08_S81_L001_R1_001.fastq.gz	A1	A01	_	PCR	_	QB	_	45C	_	A	_	8	_	R1	.fastq.gz	_1		A01_PCR_QB_45C_A_8_R1.fastq.gz	move QB-PCR-45-08_S81_L001_R1_001.fastq.gz renamed/A01_PCR_QB_45C_A_8_R1.fastq.gz
QB-PCR-45-08_S81_L001_R2_001.fastq.gz	#N/A	QB-PCR-45-08_S81_L001_R2_001.fastq.gz	QB-PCR-45-08_S81_L001_R2_001.fastq.gz	A1	A01	_	PCR	_	QB	_	45C	_	A	_	8	_	R2	.fastq.gz	_2		A01_PCR_QB_45C_A_8_R2.fastq.gz	move QB-PCR-45-08_S81_L001_R2_001.fastq.gz renamed/A01_PCR_QB_45C_A_8_R2.fastq.gz
QB-PCR-55-01_S82_L001_R1_001.fastq.gz	#N/A	QB-PCR-55-01_S82_L001_R1_001.fastq.gz	QB-PCR-55-01_S82_L001_R1_001.fastq.gz	A1	A01	_	PCR	_	QB	_	55C	_	A	_	1	_	R1	.fastq.gz	_1		A01_PCR_QB_55C_A_1_R1.fastq.gz	move QB-PCR-55-01_S82_L001_R1_001.fastq.gz renamed/A01_PCR_QB_55C_A_1_R1.fastq.gz
QB-PCR-55-01_S82_L001_R2_001.fastq.gz	#N/A	QB-PCR-55-01_S82_L001_R2_001.fastq.gz	QB-PCR-55-01_S82_L001_R2_001.fastq.gz	A1	A01	_	PCR	_	QB	_	55C	_	A	_	1	_	R2	.fastq.gz	_2		A01_PCR_QB_55C_A_1_R2.fastq.gz	move QB-PCR-55-01_S82_L001_R2_001.fastq.gz renamed/A01_PCR_QB_55C_A_1_R2.fastq.gz
QB-PCR-55-02_S83_L001_R1_001.fastq.gz	#N/A	QB-PCR-55-02_S83_L001_R1_001.fastq.gz	QB-PCR-55-02_S83_L001_R1_001.fastq.gz	A1	A01	_	PCR	_	QB	_	55C	_	A	_	2	_	R1	.fastq.gz	_1		A01_PCR_QB_55C_A_2_R1.fastq.gz	move QB-PCR-55-02_S83_L001_R1_001.fastq.gz renamed/A01_PCR_QB_55C_A_2_R1.fastq.gz
QB-PCR-55-02_S83_L001_R2_001.fastq.gz	#N/A	QB-PCR-55-02_S83_L001_R2_001.fastq.gz	QB-PCR-55-02_S83_L001_R2_001.fastq.gz	A1	A01	_	PCR	_	QB	_	55C	_	A	_	2	_	R2	.fastq.gz	_2		A01_PCR_QB_55C_A_2_R2.fastq.gz	move QB-PCR-55-02_S83_L001_R2_001.fastq.gz renamed/A01_PCR_QB_55C_A_2_R2.fastq.gz
QB-PCR-55-03_S84_L001_R1_001.fastq.gz	#N/A	QB-PCR-55-03_S84_L001_R1_001.fastq.gz	QB-PCR-55-03_S84_L001_R1_001.fastq.gz	A1	A01	_	PCR	_	QB	_	55C	_	A	_	3	_	R1	.fastq.gz	_1		A01_PCR_QB_55C_A_3_R1.fastq.gz	move QB-PCR-55-03_S84_L001_R1_001.fastq.gz renamed/A01_PCR_QB_55C_A_3_R1.fastq.gz
QB-PCR-55-03_S84_L001_R2_001.fastq.gz	#N/A	QB-PCR-55-03_S84_L001_R2_001.fastq.gz	QB-PCR-55-03_S84_L001_R2_001.fastq.gz	A1	A01	_	PCR	_	QB	_	55C	_	A	_	3	_	R2	.fastq.gz	_2		A01_PCR_QB_55C_A_3_R2.fastq.gz	move QB-PCR-55-03_S84_L001_R2_001.fastq.gz renamed/A01_PCR_QB_55C_A_3_R2.fastq.gz
QB-PCR-55-04_S85_L001_R1_001.fastq.gz	#N/A	QB-PCR-55-04_S85_L001_R1_001.fastq.gz	QB-PCR-55-04_S85_L001_R1_001.fastq.gz	A1	A01	_	PCR	_	QB	_	55C	_	A	_	4	_	R1	.fastq.gz	_1		A01_PCR_QB_55C_A_4_R1.fastq.gz	move QB-PCR-55-04_S85_L001_R1_001.fastq.gz renamed/A01_PCR_QB_55C_A_4_R1.fastq.gz
QB-PCR-55-04_S85_L001_R2_001.fastq.gz	#N/A	QB-PCR-55-04_S85_L001_R2_001.fastq.gz	QB-PCR-55-04_S85_L001_R2_001.fastq.gz	A1	A01	_	PCR	_	QB	_	55C	_	A	_	4	_	R2	.fastq.gz	_2		A01_PCR_QB_55C_A_4_R2.fastq.gz	move QB-PCR-55-04_S85_L001_R2_001.fastq.gz renamed/A01_PCR_QB_55C_A_4_R2.fastq.gz
QB-PCR-55-05_S86_L001_R1_001.fastq.gz	#N/A	QB-PCR-55-05_S86_L001_R1_001.fastq.gz	QB-PCR-55-05_S86_L001_R1_001.fastq.gz	A1	A01	_	PCR	_	QB	_	55C	_	A	_	5	_	R1	.fastq.gz	_1		A01_PCR_QB_55C_A_5_R1.fastq.gz	move QB-PCR-55-05_S86_L001_R1_001.fastq.gz renamed/A01_PCR_QB_55C_A_5_R1.fastq.gz
QB-PCR-55-05_S86_L001_R2_001.fastq.gz	#N/A	QB-PCR-55-05_S86_L001_R2_001.fastq.gz	QB-PCR-55-05_S86_L001_R2_001.fastq.gz	A1	A01	_	PCR	_	QB	_	55C	_	A	_	5	_	R2	.fastq.gz	_2		A01_PCR_QB_55C_A_5_R2.fastq.gz	move QB-PCR-55-05_S86_L001_R2_001.fastq.gz renamed/A01_PCR_QB_55C_A_5_R2.fastq.gz
QB-PCR-55-06_S87_L001_R1_001.fastq.gz	#N/A	QB-PCR-55-06_S87_L001_R1_001.fastq.gz	QB-PCR-55-06_S87_L001_R1_001.fastq.gz	A1	A01	_	PCR	_	QB	_	55C	_	A	_	6	_	R1	.fastq.gz	_1		A01_PCR_QB_55C_A_6_R1.fastq.gz	move QB-PCR-55-06_S87_L001_R1_001.fastq.gz renamed/A01_PCR_QB_55C_A_6_R1.fastq.gz
QB-PCR-55-06_S87_L001_R2_001.fastq.gz	#N/A	QB-PCR-55-06_S87_L001_R2_001.fastq.gz	QB-PCR-55-06_S87_L001_R2_001.fastq.gz	A1	A01	_	PCR	_	QB	_	55C	_	A	_	6	_	R2	.fastq.gz	_2		A01_PCR_QB_55C_A_6_R2.fastq.gz	move QB-PCR-55-06_S87_L001_R2_001.fastq.gz renamed/A01_PCR_QB_55C_A_6_R2.fastq.gz
QB-PCR-55-07_S88_L001_R1_001.fastq.gz	#N/A	QB-PCR-55-07_S88_L001_R1_001.fastq.gz	QB-PCR-55-07_S88_L001_R1_001.fastq.gz	A1	A01	_	PCR	_	QB	_	55C	_	A	_	7	_	R1	.fastq.gz	_1		A01_PCR_QB_55C_A_7_R1.fastq.gz	move QB-PCR-55-07_S88_L001_R1_001.fastq.gz renamed/A01_PCR_QB_55C_A_7_R1.fastq.gz
QB-PCR-55-07_S88_L001_R2_001.fastq.gz	#N/A	QB-PCR-55-07_S88_L001_R2_001.fastq.gz	QB-PCR-55-07_S88_L001_R2_001.fastq.gz	A1	A01	_	PCR	_	QB	_	55C	_	A	_	7	_	R2	.fastq.gz	_2		A01_PCR_QB_55C_A_7_R2.fastq.gz	move QB-PCR-55-07_S88_L001_R2_001.fastq.gz renamed/A01_PCR_QB_55C_A_7_R2.fastq.gz
QB-PCR-55-08_S89_L001_R1_001.fastq.gz	#N/A	QB-PCR-55-08_S89_L001_R1_001.fastq.gz	QB-PCR-55-08_S89_L001_R1_001.fastq.gz	A1	A01	_	PCR	_	QB	_	55C	_	A	_	8	_	R1	.fastq.gz	_1		A01_PCR_QB_55C_A_8_R1.fastq.gz	move QB-PCR-55-08_S89_L001_R1_001.fastq.gz renamed/A01_PCR_QB_55C_A_8_R1.fastq.gz
QB-PCR-55-08_S89_L001_R2_001.fastq.gz	#N/A	QB-PCR-55-08_S89_L001_R2_001.fastq.gz	QB-PCR-55-08_S89_L001_R2_001.fastq.gz	A1	A01	_	PCR	_	QB	_	55C	_	A	_	8	_	R2	.fastq.gz	_2		A01_PCR_QB_55C_A_8_R2.fastq.gz	move QB-PCR-55-08_S89_L001_R2_001.fastq.gz renamed/A01_PCR_QB_55C_A_8_R2.fastq.gz
A3-45-1	SRS4213471	214654441	SRS4213471	A3	A09	_	DePCR	_	MT	_	45C	_	A	_	1	_	R1	.fastq	_1		A09_DePCR_MT_45C_A_1_R1.fastq	move SRS4213471_1.fastq renamed/A09_DePCR_MT_45C_A_1_R1.fastq
A3-45-1	SRS4213471	214654441	SRS4213471	A3	A09	_	DePCR	_	MT	_	45C	_	A	_	1	_	R2	.fastq	_2		A09_DePCR_MT_45C_A_1_R2.fastq	move SRS4213471_2.fastq renamed/A09_DePCR_MT_45C_A_1_R2.fastq
A3-45-2	SRS4213470	214640436	SRS4213470	A3	A09	_	DePCR	_	MT	_	45C	_	A	_	2	_	R1	.fastq	_1		A09_DePCR_MT_45C_A_2_R1.fastq	move SRS4213470_1.fastq renamed/A09_DePCR_MT_45C_A_2_R1.fastq
A3-45-2	SRS4213470	214640436	SRS4213470	A3	A09	_	DePCR	_	MT	_	45C	_	A	_	2	_	R2	.fastq	_2		A09_DePCR_MT_45C_A_2_R2.fastq	move SRS4213470_2.fastq renamed/A09_DePCR_MT_45C_A_2_R2.fastq
A3-45-3	SRS4213477	214654442	SRS4213477	A3	A09	_	DePCR	_	MT	_	45C	_	A	_	3	_	R1	.fastq	_1		A09_DePCR_MT_45C_A_3_R1.fastq	move SRS4213477_1.fastq renamed/A09_DePCR_MT_45C_A_3_R1.fastq
A3-45-3	SRS4213477	214654442	SRS4213477	A3	A09	_	DePCR	_	MT	_	45C	_	A	_	3	_	R2	.fastq	_2		A09_DePCR_MT_45C_A_3_R2.fastq	move SRS4213477_2.fastq renamed/A09_DePCR_MT_45C_A_3_R2.fastq
A3-45-4	SRS4213476	214656450	SRS4213476	A3	A09	_	DePCR	_	MT	_	45C	_	A	_	4	_	R1	.fastq	_1		A09_DePCR_MT_45C_A_4_R1.fastq	move SRS4213476_1.fastq renamed/A09_DePCR_MT_45C_A_4_R1.fastq
A3-45-4	SRS4213476	214656450	SRS4213476	A3	A09	_	DePCR	_	MT	_	45C	_	A	_	4	_	R2	.fastq	_2		A09_DePCR_MT_45C_A_4_R2.fastq	move SRS4213476_2.fastq renamed/A09_DePCR_MT_45C_A_4_R2.fastq
A3-45-5	SRS4213475	214647441	SRS4213475	A3	A09	_	DePCR	_	MT	_	45C	_	A	_	5	_	R1	.fastq	_1		A09_DePCR_MT_45C_A_5_R1.fastq	move SRS4213475_1.fastq renamed/A09_DePCR_MT_45C_A_5_R1.fastq
A3-45-5	SRS4213475	214647441	SRS4213475	A3	A09	_	DePCR	_	MT	_	45C	_	A	_	5	_	R2	.fastq	_2		A09_DePCR_MT_45C_A_5_R2.fastq	move SRS4213475_2.fastq renamed/A09_DePCR_MT_45C_A_5_R2.fastq
A3-45-6	SRS4213474	214651445	SRS4213474	A3	A09	_	DePCR	_	MT	_	45C	_	A	_	6	_	R1	.fastq	_1		A09_DePCR_MT_45C_A_6_R1.fastq	move SRS4213474_1.fastq renamed/A09_DePCR_MT_45C_A_6_R1.fastq
A3-45-6	SRS4213474	214651445	SRS4213474	A3	A09	_	DePCR	_	MT	_	45C	_	A	_	6	_	R2	.fastq	_2		A09_DePCR_MT_45C_A_6_R2.fastq	move SRS4213474_2.fastq renamed/A09_DePCR_MT_45C_A_6_R2.fastq
A3-45-7	SRS4213479	214645439	SRS4213479	A3	A09	_	DePCR	_	MT	_	45C	_	A	_	7	_	R1	.fastq	_1		A09_DePCR_MT_45C_A_7_R1.fastq	move SRS4213479_1.fastq renamed/A09_DePCR_MT_45C_A_7_R1.fastq
A3-45-7	SRS4213479	214645439	SRS4213479	A3	A09	_	DePCR	_	MT	_	45C	_	A	_	7	_	R2	.fastq	_2		A09_DePCR_MT_45C_A_7_R2.fastq	move SRS4213479_2.fastq renamed/A09_DePCR_MT_45C_A_7_R2.fastq
A3-45-8	SRS4213478	214656451	SRS4213478	A3	A09	_	DePCR	_	MT	_	45C	_	A	_	8	_	R1	.fastq	_1		A09_DePCR_MT_45C_A_8_R1.fastq	move SRS4213478_1.fastq renamed/A09_DePCR_MT_45C_A_8_R1.fastq
A3-45-8	SRS4213478	214656451	SRS4213478	A3	A09	_	DePCR	_	MT	_	45C	_	A	_	8	_	R2	.fastq	_2		A09_DePCR_MT_45C_A_8_R2.fastq	move SRS4213478_2.fastq renamed/A09_DePCR_MT_45C_A_8_R2.fastq
A3-55-1	SRS4213379	214640454	SRS4213379	A3	A09	_	DePCR	_	MT	_	55C	_	A	_	1	_	R1	.fastq	_1		A09_DePCR_MT_55C_A_1_R1.fastq	move SRS4213379_1.fastq renamed/A09_DePCR_MT_55C_A_1_R1.fastq
A3-55-1	SRS4213379	214640454	SRS4213379	A3	A09	_	DePCR	_	MT	_	55C	_	A	_	1	_	R2	.fastq	_2		A09_DePCR_MT_55C_A_1_R2.fastq	move SRS4213379_2.fastq renamed/A09_DePCR_MT_55C_A_1_R2.fastq
A3-55-2	SRS4213380	214663449	SRS4213380	A3	A09	_	DePCR	_	MT	_	55C	_	A	_	2	_	R1	.fastq	_1		A09_DePCR_MT_55C_A_2_R1.fastq	move SRS4213380_1.fastq renamed/A09_DePCR_MT_55C_A_2_R1.fastq
A3-55-2	SRS4213380	214663449	SRS4213380	A3	A09	_	DePCR	_	MT	_	55C	_	A	_	2	_	R2	.fastq	_2		A09_DePCR_MT_55C_A_2_R2.fastq	move SRS4213380_2.fastq renamed/A09_DePCR_MT_55C_A_2_R2.fastq
A3-55-3	SRS4213377	214646468	SRS4213377	A3	A09	_	DePCR	_	MT	_	55C	_	A	_	3	_	R1	.fastq	_1		A09_DePCR_MT_55C_A_3_R1.fastq	move SRS4213377_1.fastq renamed/A09_DePCR_MT_55C_A_3_R1.fastq
A3-55-3	SRS4213377	214646468	SRS4213377	A3	A09	_	DePCR	_	MT	_	55C	_	A	_	3	_	R2	.fastq	_2		A09_DePCR_MT_55C_A_3_R2.fastq	move SRS4213377_2.fastq renamed/A09_DePCR_MT_55C_A_3_R2.fastq
A3-55-4	SRS4213378	214657465	SRS4213378	A3	A09	_	DePCR	_	MT	_	55C	_	A	_	4	_	R1	.fastq	_1		A09_DePCR_MT_55C_A_4_R1.fastq	move SRS4213378_1.fastq renamed/A09_DePCR_MT_55C_A_4_R1.fastq
A3-55-4	SRS4213378	214657465	SRS4213378	A3	A09	_	DePCR	_	MT	_	55C	_	A	_	4	_	R2	.fastq	_2		A09_DePCR_MT_55C_A_4_R2.fastq	move SRS4213378_2.fastq renamed/A09_DePCR_MT_55C_A_4_R2.fastq
A3-55-5	SRS4213383	214640455	SRS4213383	A3	A09	_	DePCR	_	MT	_	55C	_	A	_	5	_	R1	.fastq	_1		A09_DePCR_MT_55C_A_5_R1.fastq	move SRS4213383_1.fastq renamed/A09_DePCR_MT_55C_A_5_R1.fastq
A3-55-5	SRS4213383	214640455	SRS4213383	A3	A09	_	DePCR	_	MT	_	55C	_	A	_	5	_	R2	.fastq	_2		A09_DePCR_MT_55C_A_5_R2.fastq	move SRS4213383_2.fastq renamed/A09_DePCR_MT_55C_A_5_R2.fastq
A3-55-6	SRS4213542	214651460	SRS4213542	A3	A09	_	DePCR	_	MT	_	55C	_	A	_	6	_	R1	.fastq	_1		A09_DePCR_MT_55C_A_6_R1.fastq	move SRS4213542_1.fastq renamed/A09_DePCR_MT_55C_A_6_R1.fastq
A3-55-6	SRS4213542	214651460	SRS4213542	A3	A09	_	DePCR	_	MT	_	55C	_	A	_	6	_	R2	.fastq	_2		A09_DePCR_MT_55C_A_6_R2.fastq	move SRS4213542_2.fastq renamed/A09_DePCR_MT_55C_A_6_R2.fastq
A3-55-7	SRS4213381	214661474	SRS4213381	A3	A09	_	DePCR	_	MT	_	55C	_	A	_	7	_	R1	.fastq	_1		A09_DePCR_MT_55C_A_7_R1.fastq	move SRS4213381_1.fastq renamed/A09_DePCR_MT_55C_A_7_R1.fastq
A3-55-7	SRS4213381	214661474	SRS4213381	A3	A09	_	DePCR	_	MT	_	55C	_	A	_	7	_	R2	.fastq	_2		A09_DePCR_MT_55C_A_7_R2.fastq	move SRS4213381_2.fastq renamed/A09_DePCR_MT_55C_A_7_R2.fastq
A3-55-8	SRS4213541	214646469	SRS4213541	A3	A09	_	DePCR	_	MT	_	55C	_	A	_	8	_	R1	.fastq	_1		A09_DePCR_MT_55C_A_8_R1.fastq	move SRS4213541_1.fastq renamed/A09_DePCR_MT_55C_A_8_R1.fastq
A3-55-8	SRS4213541	214646469	SRS4213541	A3	A09	_	DePCR	_	MT	_	55C	_	A	_	8	_	R2	.fastq	_2		A09_DePCR_MT_55C_A_8_R2.fastq	move SRS4213541_2.fastq renamed/A09_DePCR_MT_55C_A_8_R2.fastq
A3S-45-1	SRS4213569	217247032	SRS4213569	A3	A09	_	PCR	_	MT	_	45C	_	A	_	1	_	R1	.fastq	_1		A09_PCR_MT_45C_A_1_R1.fastq	move SRS4213569_1.fastq renamed/A09_PCR_MT_45C_A_1_R1.fastq
A3S-45-1	SRS4213569	217247032	SRS4213569	A3	A09	_	PCR	_	MT	_	45C	_	A	_	1	_	R2	.fastq	_2		A09_PCR_MT_45C_A_1_R2.fastq	move SRS4213569_2.fastq renamed/A09_PCR_MT_45C_A_1_R2.fastq
A3S-45-2	SRS4213568	217232226	SRS4213568	A3	A09	_	PCR	_	MT	_	45C	_	A	_	2	_	R1	.fastq	_1		A09_PCR_MT_45C_A_2_R1.fastq	move SRS4213568_1.fastq renamed/A09_PCR_MT_45C_A_2_R1.fastq
A3S-45-2	SRS4213568	217232226	SRS4213568	A3	A09	_	PCR	_	MT	_	45C	_	A	_	2	_	R2	.fastq	_2		A09_PCR_MT_45C_A_2_R2.fastq	move SRS4213568_2.fastq renamed/A09_PCR_MT_45C_A_2_R2.fastq
A3S-45-3	SRS4213424	217232227	SRS4213424	A3	A09	_	PCR	_	MT	_	45C	_	A	_	3	_	R1	.fastq	_1		A09_PCR_MT_45C_A_3_R1.fastq	move SRS4213424_1.fastq renamed/A09_PCR_MT_45C_A_3_R1.fastq
A3S-45-3	SRS4213424	217232227	SRS4213424	A3	A09	_	PCR	_	MT	_	45C	_	A	_	3	_	R2	.fastq	_2		A09_PCR_MT_45C_A_3_R2.fastq	move SRS4213424_2.fastq renamed/A09_PCR_MT_45C_A_3_R2.fastq
A3S-45-4	SRS4213425	217245122	SRS4213425	A3	A09	_	PCR	_	MT	_	45C	_	A	_	4	_	R1	.fastq	_1		A09_PCR_MT_45C_A_4_R1.fastq	move SRS4213425_1.fastq renamed/A09_PCR_MT_45C_A_4_R1.fastq
A3S-45-4	SRS4213425	217245122	SRS4213425	A3	A09	_	PCR	_	MT	_	45C	_	A	_	4	_	R2	.fastq	_2		A09_PCR_MT_45C_A_4_R2.fastq	move SRS4213425_2.fastq renamed/A09_PCR_MT_45C_A_4_R2.fastq
A3S-45-5	SRS4213422	217246053	SRS4213422	A3	A09	_	PCR	_	MT	_	45C	_	A	_	5	_	R1	.fastq	_1		A09_PCR_MT_45C_A_5_R1.fastq	move SRS4213422_1.fastq renamed/A09_PCR_MT_45C_A_5_R1.fastq
A3S-45-5	SRS4213422	217246053	SRS4213422	A3	A09	_	PCR	_	MT	_	45C	_	A	_	5	_	R2	.fastq	_2		A09_PCR_MT_45C_A_5_R2.fastq	move SRS4213422_2.fastq renamed/A09_PCR_MT_45C_A_5_R2.fastq
A3S-45-6	SRS4213423	217238174	SRS4213423	A3	A09	_	PCR	_	MT	_	45C	_	A	_	6	_	R1	.fastq	_1		A09_PCR_MT_45C_A_6_R1.fastq	move SRS4213423_1.fastq renamed/A09_PCR_MT_45C_A_6_R1.fastq
A3S-45-6	SRS4213423	217238174	SRS4213423	A3	A09	_	PCR	_	MT	_	45C	_	A	_	6	_	R2	.fastq	_2		A09_PCR_MT_45C_A_6_R2.fastq	move SRS4213423_2.fastq renamed/A09_PCR_MT_45C_A_6_R2.fastq
A3S-45-7	SRS4213420	217243140	SRS4213420	A3	A09	_	PCR	_	MT	_	45C	_	A	_	7	_	R1	.fastq	_1		A09_PCR_MT_45C_A_7_R1.fastq	move SRS4213420_1.fastq renamed/A09_PCR_MT_45C_A_7_R1.fastq
A3S-45-7	SRS4213420	217243140	SRS4213420	A3	A09	_	PCR	_	MT	_	45C	_	A	_	7	_	R2	.fastq	_2		A09_PCR_MT_45C_A_7_R2.fastq	move SRS4213420_2.fastq renamed/A09_PCR_MT_45C_A_7_R2.fastq
A3S-45-8	SRS4213421	217241173	SRS4213421	A3	A09	_	PCR	_	MT	_	45C	_	A	_	8	_	R1	.fastq	_1		A09_PCR_MT_45C_A_8_R1.fastq	move SRS4213421_1.fastq renamed/A09_PCR_MT_45C_A_8_R1.fastq
A3S-45-8	SRS4213421	217241173	SRS4213421	A3	A09	_	PCR	_	MT	_	45C	_	A	_	8	_	R2	.fastq	_2		A09_PCR_MT_45C_A_8_R2.fastq	move SRS4213421_2.fastq renamed/A09_PCR_MT_45C_A_8_R2.fastq
A3S-55-1	SRS4213418	217232233	SRS4213418	A3	A09	_	PCR	_	MT	_	55C	_	A	_	1	_	R1	.fastq	_1		A09_PCR_MT_55C_A_1_R1.fastq	move SRS4213418_1.fastq renamed/A09_PCR_MT_55C_A_1_R1.fastq
A3S-55-1	SRS4213418	217232233	SRS4213418	A3	A09	_	PCR	_	MT	_	55C	_	A	_	1	_	R2	.fastq	_2		A09_PCR_MT_55C_A_1_R2.fastq	move SRS4213418_2.fastq renamed/A09_PCR_MT_55C_A_1_R2.fastq
A3S-55-2	SRS4213419	217228295	SRS4213419	A3	A09	_	PCR	_	MT	_	55C	_	A	_	2	_	R1	.fastq	_1		A09_PCR_MT_55C_A_2_R1.fastq	move SRS4213419_1.fastq renamed/A09_PCR_MT_55C_A_2_R1.fastq
A3S-55-2	SRS4213419	217228295	SRS4213419	A3	A09	_	PCR	_	MT	_	55C	_	A	_	2	_	R2	.fastq	_2		A09_PCR_MT_55C_A_2_R2.fastq	move SRS4213419_2.fastq renamed/A09_PCR_MT_55C_A_2_R2.fastq
A3S-55-3	SRS4213426	217237221	SRS4213426	A3	A09	_	PCR	_	MT	_	55C	_	A	_	3	_	R1	.fastq	_1		A09_PCR_MT_55C_A_3_R1.fastq	move SRS4213426_1.fastq renamed/A09_PCR_MT_55C_A_3_R1.fastq
A3S-55-3	SRS4213426	217237221	SRS4213426	A3	A09	_	PCR	_	MT	_	55C	_	A	_	3	_	R2	.fastq	_2		A09_PCR_MT_55C_A_3_R2.fastq	move SRS4213426_2.fastq renamed/A09_PCR_MT_55C_A_3_R2.fastq
A3S-55-4	SRS4213427	217237223	SRS4213427	A3	A09	_	PCR	_	MT	_	55C	_	A	_	4	_	R1	.fastq	_1		A09_PCR_MT_55C_A_4_R1.fastq	move SRS4213427_1.fastq renamed/A09_PCR_MT_55C_A_4_R1.fastq
A3S-55-4	SRS4213427	217237223	SRS4213427	A3	A09	_	PCR	_	MT	_	55C	_	A	_	4	_	R2	.fastq	_2		A09_PCR_MT_55C_A_4_R2.fastq	move SRS4213427_2.fastq renamed/A09_PCR_MT_55C_A_4_R2.fastq
A3S-55-5	SRS4213620	217231271	SRS4213620	A3	A09	_	PCR	_	MT	_	55C	_	A	_	5	_	R1	.fastq	_1		A09_PCR_MT_55C_A_5_R1.fastq	move SRS4213620_1.fastq renamed/A09_PCR_MT_55C_A_5_R1.fastq
A3S-55-5	SRS4213620	217231271	SRS4213620	A3	A09	_	PCR	_	MT	_	55C	_	A	_	5	_	R2	.fastq	_2		A09_PCR_MT_55C_A_5_R2.fastq	move SRS4213620_2.fastq renamed/A09_PCR_MT_55C_A_5_R2.fastq
A3S-55-6	SRS4213621	217245133	SRS4213621	A3	A09	_	PCR	_	MT	_	55C	_	A	_	6	_	R1	.fastq	_1		A09_PCR_MT_55C_A_6_R1.fastq	move SRS4213621_1.fastq renamed/A09_PCR_MT_55C_A_6_R1.fastq
A3S-55-6	SRS4213621	217245133	SRS4213621	A3	A09	_	PCR	_	MT	_	55C	_	A	_	6	_	R2	.fastq	_2		A09_PCR_MT_55C_A_6_R2.fastq	move SRS4213621_2.fastq renamed/A09_PCR_MT_55C_A_6_R2.fastq
A3S-55-7	SRS4213622	217231272	SRS4213622	A3	A09	_	PCR	_	MT	_	55C	_	A	_	7	_	R1	.fastq	_1		A09_PCR_MT_55C_A_7_R1.fastq	move SRS4213622_1.fastq renamed/A09_PCR_MT_55C_A_7_R1.fastq
A3S-55-7	SRS4213622	217231272	SRS4213622	A3	A09	_	PCR	_	MT	_	55C	_	A	_	7	_	R2	.fastq	_2		A09_PCR_MT_55C_A_7_R2.fastq	move SRS4213622_2.fastq renamed/A09_PCR_MT_55C_A_7_R2.fastq
A3S-55-8	SRS4213623	217238184	SRS4213623	A3	A09	_	PCR	_	MT	_	55C	_	A	_	8	_	R1	.fastq	_1		A09_PCR_MT_55C_A_8_R1.fastq	move SRS4213623_1.fastq renamed/A09_PCR_MT_55C_A_8_R1.fastq
A3S-55-8	SRS4213623	217238184	SRS4213623	A3	A09	_	PCR	_	MT	_	55C	_	A	_	8	_	R2	.fastq	_2		A09_PCR_MT_55C_A_8_R2.fastq	move SRS4213623_2.fastq renamed/A09_PCR_MT_55C_A_8_R2.fastq
A2-45-1	SRS4213693	214646443	SRS4213693	A2	A10	_	DePCR	_	MT	_	45C	_	A	_	1	_	R1	.fastq	_1		A10_DePCR_MT_45C_A_1_R1.fastq	move SRS4213693_1.fastq renamed/A10_DePCR_MT_45C_A_1_R1.fastq
A2-45-1	SRS4213693	214646443	SRS4213693	A2	A10	_	DePCR	_	MT	_	45C	_	A	_	1	_	R2	.fastq	_2		A10_DePCR_MT_45C_A_1_R2.fastq	move SRS4213693_2.fastq renamed/A10_DePCR_MT_45C_A_1_R2.fastq
A2-45-2	SRS4213692	214660446	SRS4213692	A2	A10	_	DePCR	_	MT	_	45C	_	A	_	2	_	R1	.fastq	_1		A10_DePCR_MT_45C_A_2_R1.fastq	move SRS4213692_1.fastq renamed/A10_DePCR_MT_45C_A_2_R1.fastq
A2-45-2	SRS4213692	214660446	SRS4213692	A2	A10	_	DePCR	_	MT	_	45C	_	A	_	2	_	R2	.fastq	_2		A10_DePCR_MT_45C_A_2_R2.fastq	move SRS4213692_2.fastq renamed/A10_DePCR_MT_45C_A_2_R2.fastq
A2-45-3	SRS4213699	214659446	SRS4213699	A2	A10	_	DePCR	_	MT	_	45C	_	A	_	3	_	R1	.fastq	_1		A10_DePCR_MT_45C_A_3_R1.fastq	move SRS4213699_1.fastq renamed/A10_DePCR_MT_45C_A_3_R1.fastq
A2-45-3	SRS4213699	214659446	SRS4213699	A2	A10	_	DePCR	_	MT	_	45C	_	A	_	3	_	R2	.fastq	_2		A10_DePCR_MT_45C_A_3_R2.fastq	move SRS4213699_2.fastq renamed/A10_DePCR_MT_45C_A_3_R2.fastq
A2-45-4	SRS4213698	214647438	SRS4213698	A2	A10	_	DePCR	_	MT	_	45C	_	A	_	4	_	R1	.fastq	_1		A10_DePCR_MT_45C_A_4_R1.fastq	move SRS4213698_1.fastq renamed/A10_DePCR_MT_45C_A_4_R1.fastq
A2-45-4	SRS4213698	214647438	SRS4213698	A2	A10	_	DePCR	_	MT	_	45C	_	A	_	4	_	R2	.fastq	_2		A10_DePCR_MT_45C_A_4_R2.fastq	move SRS4213698_2.fastq renamed/A10_DePCR_MT_45C_A_4_R2.fastq
A2-45-5	SRS4213602	214661447	SRS4213602	A2	A10	_	DePCR	_	MT	_	45C	_	A	_	5	_	R1	.fastq	_1		A10_DePCR_MT_45C_A_5_R1.fastq	move SRS4213602_1.fastq renamed/A10_DePCR_MT_45C_A_5_R1.fastq
A2-45-5	SRS4213602	214661447	SRS4213602	A2	A10	_	DePCR	_	MT	_	45C	_	A	_	5	_	R2	.fastq	_2		A10_DePCR_MT_45C_A_5_R2.fastq	move SRS4213602_2.fastq renamed/A10_DePCR_MT_45C_A_5_R2.fastq
A2-45-6	SRS4213603	214646444	SRS4213603	A2	A10	_	DePCR	_	MT	_	45C	_	A	_	6	_	R1	.fastq	_1		A10_DePCR_MT_45C_A_6_R1.fastq	move SRS4213603_1.fastq renamed/A10_DePCR_MT_45C_A_6_R1.fastq
A2-45-6	SRS4213603	214646444	SRS4213603	A2	A10	_	DePCR	_	MT	_	45C	_	A	_	6	_	R2	.fastq	_2		A10_DePCR_MT_45C_A_6_R2.fastq	move SRS4213603_2.fastq renamed/A10_DePCR_MT_45C_A_6_R2.fastq
A2-45-7	SRS4213604	214659447	SRS4213604	A2	A10	_	DePCR	_	MT	_	45C	_	A	_	7	_	R1	.fastq	_1		A10_DePCR_MT_45C_A_7_R1.fastq	move SRS4213604_1.fastq renamed/A10_DePCR_MT_45C_A_7_R1.fastq
A2-45-7	SRS4213604	214659447	SRS4213604	A2	A10	_	DePCR	_	MT	_	45C	_	A	_	7	_	R2	.fastq	_2		A10_DePCR_MT_45C_A_7_R2.fastq	move SRS4213604_2.fastq renamed/A10_DePCR_MT_45C_A_7_R2.fastq
A2-45-8	SRS4213605	214661448	SRS4213605	A2	A10	_	DePCR	_	MT	_	45C	_	A	_	8	_	R1	.fastq	_1		A10_DePCR_MT_45C_A_8_R1.fastq	move SRS4213605_1.fastq renamed/A10_DePCR_MT_45C_A_8_R1.fastq
A2-45-8	SRS4213605	214661448	SRS4213605	A2	A10	_	DePCR	_	MT	_	45C	_	A	_	8	_	R2	.fastq	_2		A10_DePCR_MT_45C_A_8_R2.fastq	move SRS4213605_2.fastq renamed/A10_DePCR_MT_45C_A_8_R2.fastq
A2-55-1	SRS4213598	214653459	SRS4213598	A2	A10	_	DePCR	_	MT	_	55C	_	A	_	1	_	R1	.fastq	_1		A10_DePCR_MT_55C_A_1_R1.fastq	move SRS4213598_1.fastq renamed/A10_DePCR_MT_55C_A_1_R1.fastq
A2-55-1	SRS4213598	214653459	SRS4213598	A2	A10	_	DePCR	_	MT	_	55C	_	A	_	1	_	R2	.fastq	_2		A10_DePCR_MT_55C_A_1_R2.fastq	move SRS4213598_2.fastq renamed/A10_DePCR_MT_55C_A_1_R2.fastq
A2-55-2	SRS4213599	214659462	SRS4213599	A2	A10	_	DePCR	_	MT	_	55C	_	A	_	2	_	R1	.fastq	_1		A10_DePCR_MT_55C_A_2_R1.fastq	move SRS4213599_1.fastq renamed/A10_DePCR_MT_55C_A_2_R1.fastq
A2-55-2	SRS4213599	214659462	SRS4213599	A2	A10	_	DePCR	_	MT	_	55C	_	A	_	2	_	R2	.fastq	_2		A10_DePCR_MT_55C_A_2_R2.fastq	move SRS4213599_2.fastq renamed/A10_DePCR_MT_55C_A_2_R2.fastq
A2-55-3	SRS4213600	214644450	SRS4213600	A2	A10	_	DePCR	_	MT	_	55C	_	A	_	3	_	R1	.fastq	_1		A10_DePCR_MT_55C_A_3_R1.fastq	move SRS4213600_1.fastq renamed/A10_DePCR_MT_55C_A_3_R1.fastq
A2-55-3	SRS4213600	214644450	SRS4213600	A2	A10	_	DePCR	_	MT	_	55C	_	A	_	3	_	R2	.fastq	_2		A10_DePCR_MT_55C_A_3_R2.fastq	move SRS4213600_2.fastq renamed/A10_DePCR_MT_55C_A_3_R2.fastq
A2-55-4	SRS4213601	214644451	SRS4213601	A2	A10	_	DePCR	_	MT	_	55C	_	A	_	4	_	R1	.fastq	_1		A10_DePCR_MT_55C_A_4_R1.fastq	move SRS4213601_1.fastq renamed/A10_DePCR_MT_55C_A_4_R1.fastq
A2-55-4	SRS4213601	214644451	SRS4213601	A2	A10	_	DePCR	_	MT	_	55C	_	A	_	4	_	R2	.fastq	_2		A10_DePCR_MT_55C_A_4_R2.fastq	move SRS4213601_2.fastq renamed/A10_DePCR_MT_55C_A_4_R2.fastq
A2-55-5	SRS4213596	214661473	SRS4213596	A2	A10	_	DePCR	_	MT	_	55C	_	A	_	5	_	R1	.fastq	_1		A10_DePCR_MT_55C_A_5_R1.fastq	move SRS4213596_1.fastq renamed/A10_DePCR_MT_55C_A_5_R1.fastq
A2-55-5	SRS4213596	214661473	SRS4213596	A2	A10	_	DePCR	_	MT	_	55C	_	A	_	5	_	R2	.fastq	_2		A10_DePCR_MT_55C_A_5_R2.fastq	move SRS4213596_2.fastq renamed/A10_DePCR_MT_55C_A_5_R2.fastq
A2-55-6	SRS4213597	214647461	SRS4213597	A2	A10	_	DePCR	_	MT	_	55C	_	A	_	6	_	R1	.fastq	_1		A10_DePCR_MT_55C_A_6_R1.fastq	move SRS4213597_1.fastq renamed/A10_DePCR_MT_55C_A_6_R1.fastq
A2-55-6	SRS4213597	214647461	SRS4213597	A2	A10	_	DePCR	_	MT	_	55C	_	A	_	6	_	R2	.fastq	_2		A10_DePCR_MT_55C_A_6_R2.fastq	move SRS4213597_2.fastq renamed/A10_DePCR_MT_55C_A_6_R2.fastq
A2-55-7	SRS4213473	214640453	SRS4213473	A2	A10	_	DePCR	_	MT	_	55C	_	A	_	7	_	R1	.fastq	_1		A10_DePCR_MT_55C_A_7_R1.fastq	move SRS4213473_1.fastq renamed/A10_DePCR_MT_55C_A_7_R1.fastq
A2-55-7	SRS4213473	214640453	SRS4213473	A2	A10	_	DePCR	_	MT	_	55C	_	A	_	7	_	R2	.fastq	_2		A10_DePCR_MT_55C_A_7_R2.fastq	move SRS4213473_2.fastq renamed/A10_DePCR_MT_55C_A_7_R2.fastq
A2-55-8	SRS4213472	214651459	SRS4213472	A2	A10	_	DePCR	_	MT	_	55C	_	A	_	8	_	R1	.fastq	_1		A10_DePCR_MT_55C_A_8_R1.fastq	move SRS4213472_1.fastq renamed/A10_DePCR_MT_55C_A_8_R1.fastq
A2-55-8	SRS4213472	214651459	SRS4213472	A2	A10	_	DePCR	_	MT	_	55C	_	A	_	8	_	R2	.fastq	_2		A10_DePCR_MT_55C_A_8_R2.fastq	move SRS4213472_2.fastq renamed/A10_DePCR_MT_55C_A_8_R2.fastq
A2S-45-1	SRS4213668	217235195	SRS4213668	A2	A10	_	PCR	_	MT	_	45C	_	A	_	1	_	R1	.fastq	_1		A10_PCR_MT_45C_A_1_R1.fastq	move SRS4213668_1.fastq renamed/A10_PCR_MT_45C_A_1_R1.fastq
A2S-45-1	SRS4213668	217235195	SRS4213668	A2	A10	_	PCR	_	MT	_	45C	_	A	_	1	_	R2	.fastq	_2		A10_PCR_MT_45C_A_1_R2.fastq	move SRS4213668_2.fastq renamed/A10_PCR_MT_45C_A_1_R2.fastq
A2S-45-2	SRS4213669	217228284	SRS4213669	A2	A10	_	PCR	_	MT	_	45C	_	A	_	2	_	R1	.fastq	_1		A10_PCR_MT_45C_A_2_R1.fastq	move SRS4213669_1.fastq renamed/A10_PCR_MT_45C_A_2_R1.fastq
A2S-45-2	SRS4213669	217228284	SRS4213669	A2	A10	_	PCR	_	MT	_	45C	_	A	_	2	_	R2	.fastq	_2		A10_PCR_MT_45C_A_2_R2.fastq	move SRS4213669_2.fastq renamed/A10_PCR_MT_45C_A_2_R2.fastq
A2S-45-3	SRS4213662	217246047	SRS4213662	A2	A10	_	PCR	_	MT	_	45C	_	A	_	3	_	R1	.fastq	_1		A10_PCR_MT_45C_A_3_R1.fastq	move SRS4213662_1.fastq renamed/A10_PCR_MT_45C_A_3_R1.fastq
A2S-45-3	SRS4213662	217246047	SRS4213662	A2	A10	_	PCR	_	MT	_	45C	_	A	_	3	_	R2	.fastq	_2		A10_PCR_MT_45C_A_3_R2.fastq	move SRS4213662_2.fastq renamed/A10_PCR_MT_45C_A_3_R2.fastq
A2S-45-4	SRS4213663	217236205	SRS4213663	A2	A10	_	PCR	_	MT	_	45C	_	A	_	4	_	R1	.fastq	_1		A10_PCR_MT_45C_A_4_R1.fastq	move SRS4213663_1.fastq renamed/A10_PCR_MT_45C_A_4_R1.fastq
A2S-45-4	SRS4213663	217236205	SRS4213663	A2	A10	_	PCR	_	MT	_	45C	_	A	_	4	_	R2	.fastq	_2		A10_PCR_MT_45C_A_4_R2.fastq	move SRS4213663_2.fastq renamed/A10_PCR_MT_45C_A_4_R2.fastq
A2S-45-5	SRS4213664	217243137	SRS4213664	A2	A10	_	PCR	_	MT	_	45C	_	A	_	5	_	R1	.fastq	_1		A10_PCR_MT_45C_A_5_R1.fastq	move SRS4213664_1.fastq renamed/A10_PCR_MT_45C_A_5_R1.fastq
A2S-45-5	SRS4213664	217243137	SRS4213664	A2	A10	_	PCR	_	MT	_	45C	_	A	_	5	_	R2	.fastq	_2		A10_PCR_MT_45C_A_5_R2.fastq	move SRS4213664_2.fastq renamed/A10_PCR_MT_45C_A_5_R2.fastq
A2S-45-6	SRS4213665	217235197	SRS4213665	A2	A10	_	PCR	_	MT	_	45C	_	A	_	6	_	R1	.fastq	_1		A10_PCR_MT_45C_A_6_R1.fastq	move SRS4213665_1.fastq renamed/A10_PCR_MT_45C_A_6_R1.fastq
A2S-45-6	SRS4213665	217235197	SRS4213665	A2	A10	_	PCR	_	MT	_	45C	_	A	_	6	_	R2	.fastq	_2		A10_PCR_MT_45C_A_6_R2.fastq	move SRS4213665_2.fastq renamed/A10_PCR_MT_45C_A_6_R2.fastq
A2S-45-7	SRS4213660	217229260	SRS4213660	A2	A10	_	PCR	_	MT	_	45C	_	A	_	7	_	R1	.fastq	_1		A10_PCR_MT_45C_A_7_R1.fastq	move SRS4213660_1.fastq renamed/A10_PCR_MT_45C_A_7_R1.fastq
A2S-45-7	SRS4213660	217229260	SRS4213660	A2	A10	_	PCR	_	MT	_	45C	_	A	_	7	_	R2	.fastq	_2		A10_PCR_MT_45C_A_7_R2.fastq	move SRS4213660_2.fastq renamed/A10_PCR_MT_45C_A_7_R2.fastq
A2S-45-8	SRS4213661	217237205	SRS4213661	A2	A10	_	PCR	_	MT	_	45C	_	A	_	8	_	R1	.fastq	_1		A10_PCR_MT_45C_A_8_R1.fastq	move SRS4213661_1.fastq renamed/A10_PCR_MT_45C_A_8_R1.fastq
A2S-45-8	SRS4213661	217237205	SRS4213661	A2	A10	_	PCR	_	MT	_	45C	_	A	_	8	_	R2	.fastq	_2		A10_PCR_MT_45C_A_8_R2.fastq	move SRS4213661_2.fastq renamed/A10_PCR_MT_45C_A_8_R2.fastq
A2S-55-1	SRS4213561	217246066	SRS4213561	A2	A10	_	PCR	_	MT	_	55C	_	A	_	1	_	R1	.fastq	_1		A10_PCR_MT_55C_A_1_R1.fastq	move SRS4213561_1.fastq renamed/A10_PCR_MT_55C_A_1_R1.fastq
A2S-55-1	SRS4213561	217246066	SRS4213561	A2	A10	_	PCR	_	MT	_	55C	_	A	_	1	_	R2	.fastq	_2		A10_PCR_MT_55C_A_1_R2.fastq	move SRS4213561_2.fastq renamed/A10_PCR_MT_55C_A_1_R2.fastq
A2S-55-2	SRS4213560	217244134	SRS4213560	A2	A10	_	PCR	_	MT	_	55C	_	A	_	2	_	R1	.fastq	_1		A10_PCR_MT_55C_A_2_R1.fastq	move SRS4213560_1.fastq renamed/A10_PCR_MT_55C_A_2_R1.fastq
A2S-55-2	SRS4213560	217244134	SRS4213560	A2	A10	_	PCR	_	MT	_	55C	_	A	_	2	_	R2	.fastq	_2		A10_PCR_MT_55C_A_2_R2.fastq	move SRS4213560_2.fastq renamed/A10_PCR_MT_55C_A_2_R2.fastq
A2S-55-3	SRS4213563	217241177	SRS4213563	A2	A10	_	PCR	_	MT	_	55C	_	A	_	3	_	R1	.fastq	_1		A10_PCR_MT_55C_A_3_R1.fastq	move SRS4213563_1.fastq renamed/A10_PCR_MT_55C_A_3_R1.fastq
A2S-55-3	SRS4213563	217241177	SRS4213563	A2	A10	_	PCR	_	MT	_	55C	_	A	_	3	_	R2	.fastq	_2		A10_PCR_MT_55C_A_3_R2.fastq	move SRS4213563_2.fastq renamed/A10_PCR_MT_55C_A_3_R2.fastq
A2S-55-4	SRS4213562	217235205	SRS4213562	A2	A10	_	PCR	_	MT	_	55C	_	A	_	4	_	R1	.fastq	_1		A10_PCR_MT_55C_A_4_R1.fastq	move SRS4213562_1.fastq renamed/A10_PCR_MT_55C_A_4_R1.fastq
A2S-55-4	SRS4213562	217235205	SRS4213562	A2	A10	_	PCR	_	MT	_	55C	_	A	_	4	_	R2	.fastq	_2		A10_PCR_MT_55C_A_4_R2.fastq	move SRS4213562_2.fastq renamed/A10_PCR_MT_55C_A_4_R2.fastq
A2S-55-5	SRS4213557	217242147	SRS4213557	A2	A10	_	PCR	_	MT	_	55C	_	A	_	5	_	R1	.fastq	_1		A10_PCR_MT_55C_A_5_R1.fastq	move SRS4213557_1.fastq renamed/A10_PCR_MT_55C_A_5_R1.fastq
A2S-55-5	SRS4213557	217242147	SRS4213557	A2	A10	_	PCR	_	MT	_	55C	_	A	_	5	_	R2	.fastq	_2		A10_PCR_MT_55C_A_5_R2.fastq	move SRS4213557_2.fastq renamed/A10_PCR_MT_55C_A_5_R2.fastq
A2S-55-6	SRS4213556	217235206	SRS4213556	A2	A10	_	PCR	_	MT	_	55C	_	A	_	6	_	R1	.fastq	_1		A10_PCR_MT_55C_A_6_R1.fastq	move SRS4213556_1.fastq renamed/A10_PCR_MT_55C_A_6_R1.fastq
A2S-55-6	SRS4213556	217235206	SRS4213556	A2	A10	_	PCR	_	MT	_	55C	_	A	_	6	_	R2	.fastq	_2		A10_PCR_MT_55C_A_6_R2.fastq	move SRS4213556_2.fastq renamed/A10_PCR_MT_55C_A_6_R2.fastq
A2S-55-7	SRS4213559	217228294	SRS4213559	A2	A10	_	PCR	_	MT	_	55C	_	A	_	7	_	R1	.fastq	_1		A10_PCR_MT_55C_A_7_R1.fastq	move SRS4213559_1.fastq renamed/A10_PCR_MT_55C_A_7_R1.fastq
A2S-55-7	SRS4213559	217228294	SRS4213559	A2	A10	_	PCR	_	MT	_	55C	_	A	_	7	_	R2	.fastq	_2		A10_PCR_MT_55C_A_7_R2.fastq	move SRS4213559_2.fastq renamed/A10_PCR_MT_55C_A_7_R2.fastq
A2S-55-8	SRS4213558	217240178	SRS4213558	A2	A10	_	PCR	_	MT	_	55C	_	A	_	8	_	R1	.fastq	_1		A10_PCR_MT_55C_A_8_R1.fastq	move SRS4213558_1.fastq renamed/A10_PCR_MT_55C_A_8_R1.fastq
A2S-55-8	SRS4213558	217240178	SRS4213558	A2	A10	_	PCR	_	MT	_	55C	_	A	_	8	_	R2	.fastq	_2		A10_PCR_MT_55C_A_8_R2.fastq	move SRS4213558_2.fastq renamed/A10_PCR_MT_55C_A_8_R2.fastq
A4-45-1	SRS4213375	214644437	SRS4213375	A4	A27	_	DePCR	_	MT	_	45C	_	A	_	1	_	R1	.fastq	_1		A27_DePCR_MT_45C_A_1_R1.fastq	move SRS4213375_1.fastq renamed/A27_DePCR_MT_45C_A_1_R1.fastq
A4-45-1	SRS4213375	214644437	SRS4213375	A4	A27	_	DePCR	_	MT	_	45C	_	A	_	1	_	R2	.fastq	_2		A27_DePCR_MT_45C_A_1_R2.fastq	move SRS4213375_2.fastq renamed/A27_DePCR_MT_45C_A_1_R2.fastq
A4-45-2	SRS4213376	214639441	SRS4213376	A4	A27	_	DePCR	_	MT	_	45C	_	A	_	2	_	R1	.fastq	_1		A27_DePCR_MT_45C_A_2_R1.fastq	move SRS4213376_1.fastq renamed/A27_DePCR_MT_45C_A_2_R1.fastq
A4-45-2	SRS4213376	214639441	SRS4213376	A4	A27	_	DePCR	_	MT	_	45C	_	A	_	2	_	R2	.fastq	_2		A27_DePCR_MT_45C_A_2_R2.fastq	move SRS4213376_2.fastq renamed/A27_DePCR_MT_45C_A_2_R2.fastq
A4-45-3	SRS4213749	214639442	SRS4213749	A4	A27	_	DePCR	_	MT	_	45C	_	A	_	3	_	R1	.fastq	_1		A27_DePCR_MT_45C_A_3_R1.fastq	move SRS4213749_1.fastq renamed/A27_DePCR_MT_45C_A_3_R1.fastq
A4-45-3	SRS4213749	214639442	SRS4213749	A4	A27	_	DePCR	_	MT	_	45C	_	A	_	3	_	R2	.fastq	_2		A27_DePCR_MT_45C_A_3_R2.fastq	move SRS4213749_2.fastq renamed/A27_DePCR_MT_45C_A_3_R2.fastq
A4-45-4	SRS4213748	214646445	SRS4213748	A4	A27	_	DePCR	_	MT	_	45C	_	A	_	4	_	R1	.fastq	_1		A27_DePCR_MT_45C_A_4_R1.fastq	move SRS4213748_1.fastq renamed/A27_DePCR_MT_45C_A_4_R1.fastq
A4-45-4	SRS4213748	214646445	SRS4213748	A4	A27	_	DePCR	_	MT	_	45C	_	A	_	4	_	R2	.fastq	_2		A27_DePCR_MT_45C_A_4_R2.fastq	move SRS4213748_2.fastq renamed/A27_DePCR_MT_45C_A_4_R2.fastq
A4-45-5	SRS4213751	214656452	SRS4213751	A4	A27	_	DePCR	_	MT	_	45C	_	A	_	5	_	R1	.fastq	_1		A27_DePCR_MT_45C_A_5_R1.fastq	move SRS4213751_1.fastq renamed/A27_DePCR_MT_45C_A_5_R1.fastq
A4-45-5	SRS4213751	214656452	SRS4213751	A4	A27	_	DePCR	_	MT	_	45C	_	A	_	5	_	R2	.fastq	_2		A27_DePCR_MT_45C_A_5_R2.fastq	move SRS4213751_2.fastq renamed/A27_DePCR_MT_45C_A_5_R2.fastq
A4-45-6	SRS4213750	214651446	SRS4213750	A4	A27	_	DePCR	_	MT	_	45C	_	A	_	6	_	R1	.fastq	_1		A27_DePCR_MT_45C_A_6_R1.fastq	move SRS4213750_1.fastq renamed/A27_DePCR_MT_45C_A_6_R1.fastq
A4-45-6	SRS4213750	214651446	SRS4213750	A4	A27	_	DePCR	_	MT	_	45C	_	A	_	6	_	R2	.fastq	_2		A27_DePCR_MT_45C_A_6_R2.fastq	move SRS4213750_2.fastq renamed/A27_DePCR_MT_45C_A_6_R2.fastq
A4-45-7	SRS4213753	214662451	SRS4213753	A4	A27	_	DePCR	_	MT	_	45C	_	A	_	7	_	R1	.fastq	_1		A27_DePCR_MT_45C_A_7_R1.fastq	move SRS4213753_1.fastq renamed/A27_DePCR_MT_45C_A_7_R1.fastq
A4-45-7	SRS4213753	214662451	SRS4213753	A4	A27	_	DePCR	_	MT	_	45C	_	A	_	7	_	R2	.fastq	_2		A27_DePCR_MT_45C_A_7_R2.fastq	move SRS4213753_2.fastq renamed/A27_DePCR_MT_45C_A_7_R2.fastq
A4-45-8	SRS4213752	214645441	SRS4213752	A4	A27	_	DePCR	_	MT	_	45C	_	A	_	8	_	R1	.fastq	_1		A27_DePCR_MT_45C_A_8_R1.fastq	move SRS4213752_1.fastq renamed/A27_DePCR_MT_45C_A_8_R1.fastq
A4-45-8	SRS4213752	214645441	SRS4213752	A4	A27	_	DePCR	_	MT	_	45C	_	A	_	8	_	R2	.fastq	_2		A27_DePCR_MT_45C_A_8_R2.fastq	move SRS4213752_2.fastq renamed/A27_DePCR_MT_45C_A_8_R2.fastq
A4-55-1	SRS4213755	214644453	SRS4213755	A4	A27	_	DePCR	_	MT	_	55C	_	A	_	1	_	R1	.fastq	_1		A27_DePCR_MT_55C_A_1_R1.fastq	move SRS4213755_1.fastq renamed/A27_DePCR_MT_55C_A_1_R1.fastq
A4-55-1	SRS4213755	214644453	SRS4213755	A4	A27	_	DePCR	_	MT	_	55C	_	A	_	1	_	R2	.fastq	_2		A27_DePCR_MT_55C_A_1_R2.fastq	move SRS4213755_2.fastq renamed/A27_DePCR_MT_55C_A_1_R2.fastq
A4-55-2	SRS4213754	214648454	SRS4213754	A4	A27	_	DePCR	_	MT	_	55C	_	A	_	2	_	R1	.fastq	_1		A27_DePCR_MT_55C_A_2_R1.fastq	move SRS4213754_1.fastq renamed/A27_DePCR_MT_55C_A_2_R1.fastq
A4-55-2	SRS4213754	214648454	SRS4213754	A4	A27	_	DePCR	_	MT	_	55C	_	A	_	2	_	R2	.fastq	_2		A27_DePCR_MT_55C_A_2_R2.fastq	move SRS4213754_2.fastq renamed/A27_DePCR_MT_55C_A_2_R2.fastq
A4-55-3	SRS4213747	214653461	SRS4213747	A4	A27	_	DePCR	_	MT	_	55C	_	A	_	3	_	R1	.fastq	_1		A27_DePCR_MT_55C_A_3_R1.fastq	move SRS4213747_1.fastq renamed/A27_DePCR_MT_55C_A_3_R1.fastq
A4-55-3	SRS4213747	214653461	SRS4213747	A4	A27	_	DePCR	_	MT	_	55C	_	A	_	3	_	R2	.fastq	_2		A27_DePCR_MT_55C_A_3_R2.fastq	move SRS4213747_2.fastq renamed/A27_DePCR_MT_55C_A_3_R2.fastq
A4-55-4	SRS4213745	214645451	SRS4213745	A4	A27	_	DePCR	_	MT	_	55C	_	A	_	4	_	R1	.fastq	_1		A27_DePCR_MT_55C_A_4_R1.fastq	move SRS4213745_1.fastq renamed/A27_DePCR_MT_55C_A_4_R1.fastq
A4-55-4	SRS4213745	214645451	SRS4213745	A4	A27	_	DePCR	_	MT	_	55C	_	A	_	4	_	R2	.fastq	_2		A27_DePCR_MT_55C_A_4_R2.fastq	move SRS4213745_2.fastq renamed/A27_DePCR_MT_55C_A_4_R2.fastq
A4-55-5	SRS4213681	214662466	SRS4213681	A4	A27	_	DePCR	_	MT	_	55C	_	A	_	5	_	R1	.fastq	_1		A27_DePCR_MT_55C_A_5_R1.fastq	move SRS4213681_1.fastq renamed/A27_DePCR_MT_55C_A_5_R1.fastq
A4-55-5	SRS4213681	214662466	SRS4213681	A4	A27	_	DePCR	_	MT	_	55C	_	A	_	5	_	R2	.fastq	_2		A27_DePCR_MT_55C_A_5_R2.fastq	move SRS4213681_2.fastq renamed/A27_DePCR_MT_55C_A_5_R2.fastq
A4-55-6	SRS4213680	214662467	SRS4213680	A4	A27	_	DePCR	_	MT	_	55C	_	A	_	6	_	R1	.fastq	_1		A27_DePCR_MT_55C_A_6_R1.fastq	move SRS4213680_1.fastq renamed/A27_DePCR_MT_55C_A_6_R1.fastq
A4-55-6	SRS4213680	214662467	SRS4213680	A4	A27	_	DePCR	_	MT	_	55C	_	A	_	6	_	R2	.fastq	_2		A27_DePCR_MT_55C_A_6_R2.fastq	move SRS4213680_2.fastq renamed/A27_DePCR_MT_55C_A_6_R2.fastq
A4-55-7	SRS4213682	214657466	SRS4213682	A4	A27	_	DePCR	_	MT	_	55C	_	A	_	7	_	R1	.fastq	_1		A27_DePCR_MT_55C_A_7_R1.fastq	move SRS4213682_1.fastq renamed/A27_DePCR_MT_55C_A_7_R1.fastq
A4-55-7	SRS4213682	214657466	SRS4213682	A4	A27	_	DePCR	_	MT	_	55C	_	A	_	7	_	R2	.fastq	_2		A27_DePCR_MT_55C_A_7_R2.fastq	move SRS4213682_2.fastq renamed/A27_DePCR_MT_55C_A_7_R2.fastq
A4-55-8	SRS4213683	214653462	SRS4213683	A4	A27	_	DePCR	_	MT	_	55C	_	A	_	8	_	R1	.fastq	_1		A27_DePCR_MT_55C_A_8_R1.fastq	move SRS4213683_1.fastq renamed/A27_DePCR_MT_55C_A_8_R1.fastq
A4-55-8	SRS4213683	214653462	SRS4213683	A4	A27	_	DePCR	_	MT	_	55C	_	A	_	8	_	R2	.fastq	_2		A27_DePCR_MT_55C_A_8_R2.fastq	move SRS4213683_2.fastq renamed/A27_DePCR_MT_55C_A_8_R2.fastq
A4S-45-1	SRS4213616	217240168	SRS4213616	A4	A27	_	PCR	_	MT	_	45C	_	A	_	1	_	R1	.fastq	_1		A27_PCR_MT_45C_A_1_R1.fastq	move SRS4213616_1.fastq renamed/A27_PCR_MT_45C_A_1_R1.fastq
A4S-45-1	SRS4213616	217240168	SRS4213616	A4	A27	_	PCR	_	MT	_	45C	_	A	_	1	_	R2	.fastq	_2		A27_PCR_MT_45C_A_1_R2.fastq	move SRS4213616_2.fastq renamed/A27_PCR_MT_45C_A_1_R2.fastq
A4S-45-2	SRS4213617	217230267	SRS4213617	A4	A27	_	PCR	_	MT	_	45C	_	A	_	2	_	R1	.fastq	_1		A27_PCR_MT_45C_A_2_R1.fastq	move SRS4213617_1.fastq renamed/A27_PCR_MT_45C_A_2_R1.fastq
A4S-45-2	SRS4213617	217230267	SRS4213617	A4	A27	_	PCR	_	MT	_	45C	_	A	_	2	_	R2	.fastq	_2		A27_PCR_MT_45C_A_2_R2.fastq	move SRS4213617_2.fastq renamed/A27_PCR_MT_45C_A_2_R2.fastq
A4S-45-3	SRS4213618	217244125	SRS4213618	A4	A27	_	PCR	_	MT	_	45C	_	A	_	3	_	R1	.fastq	_1		A27_PCR_MT_45C_A_3_R1.fastq	move SRS4213618_1.fastq renamed/A27_PCR_MT_45C_A_3_R1.fastq
A4S-45-3	SRS4213618	217244125	SRS4213618	A4	A27	_	PCR	_	MT	_	45C	_	A	_	3	_	R2	.fastq	_2		A27_PCR_MT_45C_A_3_R2.fastq	move SRS4213618_2.fastq renamed/A27_PCR_MT_45C_A_3_R2.fastq
A4S-45-4	SRS4213619	217244126	SRS4213619	A4	A27	_	PCR	_	MT	_	45C	_	A	_	4	_	R1	.fastq	_1		A27_PCR_MT_45C_A_4_R1.fastq	move SRS4213619_1.fastq renamed/A27_PCR_MT_45C_A_4_R1.fastq
A4S-45-4	SRS4213619	217244126	SRS4213619	A4	A27	_	PCR	_	MT	_	45C	_	A	_	4	_	R2	.fastq	_2		A27_PCR_MT_45C_A_4_R2.fastq	move SRS4213619_2.fastq renamed/A27_PCR_MT_45C_A_4_R2.fastq
A4S-45-5	SRS4213624	217246056	SRS4213624	A4	A27	_	PCR	_	MT	_	45C	_	A	_	5	_	R1	.fastq	_1		A27_PCR_MT_45C_A_5_R1.fastq	move SRS4213624_1.fastq renamed/A27_PCR_MT_45C_A_5_R1.fastq
A4S-45-5	SRS4213624	217246056	SRS4213624	A4	A27	_	PCR	_	MT	_	45C	_	A	_	5	_	R2	.fastq	_2		A27_PCR_MT_45C_A_5_R2.fastq	move SRS4213624_2.fastq renamed/A27_PCR_MT_45C_A_5_R2.fastq
A4S-45-6	SRS4213625	217237211	SRS4213625	A4	A27	_	PCR	_	MT	_	45C	_	A	_	6	_	R1	.fastq	_1		A27_PCR_MT_45C_A_6_R1.fastq	move SRS4213625_1.fastq renamed/A27_PCR_MT_45C_A_6_R1.fastq
A4S-45-6	SRS4213625	217237211	SRS4213625	A4	A27	_	PCR	_	MT	_	45C	_	A	_	6	_	R2	.fastq	_2		A27_PCR_MT_45C_A_6_R2.fastq	move SRS4213625_2.fastq renamed/A27_PCR_MT_45C_A_6_R2.fastq
A4S-45-7	SRS4213769	217242140	SRS4213769	A4	A27	_	PCR	_	MT	_	45C	_	A	_	7	_	R1	.fastq	_1		A27_PCR_MT_45C_A_7_R1.fastq	move SRS4213769_1.fastq renamed/A27_PCR_MT_45C_A_7_R1.fastq
A4S-45-7	SRS4213769	217242140	SRS4213769	A4	A27	_	PCR	_	MT	_	45C	_	A	_	7	_	R2	.fastq	_2		A27_PCR_MT_45C_A_7_R2.fastq	move SRS4213769_2.fastq renamed/A27_PCR_MT_45C_A_7_R2.fastq
A4S-45-8	SRS4213768	217239205	SRS4213768	A4	A27	_	PCR	_	MT	_	45C	_	A	_	8	_	R1	.fastq	_1		A27_PCR_MT_45C_A_8_R1.fastq	move SRS4213768_1.fastq renamed/A27_PCR_MT_45C_A_8_R1.fastq
A4S-45-8	SRS4213768	217239205	SRS4213768	A4	A27	_	PCR	_	MT	_	45C	_	A	_	8	_	R2	.fastq	_2		A27_PCR_MT_45C_A_8_R2.fastq	move SRS4213768_2.fastq renamed/A27_PCR_MT_45C_A_8_R2.fastq
A4S-55-1	SRS4213767	217235212	SRS4213767	A4	A27	_	PCR	_	MT	_	55C	_	A	_	1	_	R1	.fastq	_1		A27_PCR_MT_55C_A_1_R1.fastq	move SRS4213767_1.fastq renamed/A27_PCR_MT_55C_A_1_R1.fastq
A4S-55-1	SRS4213767	217235212	SRS4213767	A4	A27	_	PCR	_	MT	_	55C	_	A	_	1	_	R2	.fastq	_2		A27_PCR_MT_55C_A_1_R2.fastq	move SRS4213767_2.fastq renamed/A27_PCR_MT_55C_A_1_R2.fastq
A4S-55-2	SRS4213766	217229270	SRS4213766	A4	A27	_	PCR	_	MT	_	55C	_	A	_	2	_	R1	.fastq	_1		A27_PCR_MT_55C_A_2_R1.fastq	move SRS4213766_1.fastq renamed/A27_PCR_MT_55C_A_2_R1.fastq
A4S-55-2	SRS4213766	217229270	SRS4213766	A4	A27	_	PCR	_	MT	_	55C	_	A	_	2	_	R2	.fastq	_2		A27_PCR_MT_55C_A_2_R2.fastq	move SRS4213766_2.fastq renamed/A27_PCR_MT_55C_A_2_R2.fastq
A4S-55-3	SRS4213774	217239213	SRS4213774	A4	A27	_	PCR	_	MT	_	55C	_	A	_	3	_	R1	.fastq	_1		A27_PCR_MT_55C_A_3_R1.fastq	move SRS4213774_1.fastq renamed/A27_PCR_MT_55C_A_3_R1.fastq
A4S-55-3	SRS4213774	217239213	SRS4213774	A4	A27	_	PCR	_	MT	_	55C	_	A	_	3	_	R2	.fastq	_2		A27_PCR_MT_55C_A_3_R2.fastq	move SRS4213774_2.fastq renamed/A27_PCR_MT_55C_A_3_R2.fastq
A4S-55-4	SRS4213772	217245136	SRS4213772	A4	A27	_	PCR	_	MT	_	55C	_	A	_	4	_	R1	.fastq	_1		A27_PCR_MT_55C_A_4_R1.fastq	move SRS4213772_1.fastq renamed/A27_PCR_MT_55C_A_4_R1.fastq
A4S-55-4	SRS4213772	217245136	SRS4213772	A4	A27	_	PCR	_	MT	_	55C	_	A	_	4	_	R2	.fastq	_2		A27_PCR_MT_55C_A_4_R2.fastq	move SRS4213772_2.fastq renamed/A27_PCR_MT_55C_A_4_R2.fastq
A4S-55-5	SRS4213771	217235213	SRS4213771	A4	A27	_	PCR	_	MT	_	55C	_	A	_	5	_	R1	.fastq	_1		A27_PCR_MT_55C_A_5_R1.fastq	move SRS4213771_1.fastq renamed/A27_PCR_MT_55C_A_5_R1.fastq
A4S-55-5	SRS4213771	217235213	SRS4213771	A4	A27	_	PCR	_	MT	_	55C	_	A	_	5	_	R2	.fastq	_2		A27_PCR_MT_55C_A_5_R2.fastq	move SRS4213771_2.fastq renamed/A27_PCR_MT_55C_A_5_R2.fastq
A4S-55-6	SRS4213770	217232237	SRS4213770	A4	A27	_	PCR	_	MT	_	55C	_	A	_	6	_	R1	.fastq	_1		A27_PCR_MT_55C_A_6_R1.fastq	move SRS4213770_1.fastq renamed/A27_PCR_MT_55C_A_6_R1.fastq
A4S-55-6	SRS4213770	217232237	SRS4213770	A4	A27	_	PCR	_	MT	_	55C	_	A	_	6	_	R2	.fastq	_2		A27_PCR_MT_55C_A_6_R2.fastq	move SRS4213770_2.fastq renamed/A27_PCR_MT_55C_A_6_R2.fastq
A4S-55-7	SRS4213775	217246070	SRS4213775	A4	A27	_	PCR	_	MT	_	55C	_	A	_	7	_	R1	.fastq	_1		A27_PCR_MT_55C_A_7_R1.fastq	move SRS4213775_1.fastq renamed/A27_PCR_MT_55C_A_7_R1.fastq
A4S-55-7	SRS4213775	217246070	SRS4213775	A4	A27	_	PCR	_	MT	_	55C	_	A	_	7	_	R2	.fastq	_2		A27_PCR_MT_55C_A_7_R2.fastq	move SRS4213775_2.fastq renamed/A27_PCR_MT_55C_A_7_R2.fastq
A4S-55-8	SRS4213773	217243151	SRS4213773	A4	A27	_	PCR	_	MT	_	55C	_	A	_	8	_	R1	.fastq	_1		A27_PCR_MT_55C_A_8_R1.fastq	move SRS4213773_1.fastq renamed/A27_PCR_MT_55C_A_8_R1.fastq
A4S-55-8	SRS4213773	217243151	SRS4213773	A4	A27	_	PCR	_	MT	_	55C	_	A	_	8	_	R2	.fastq	_2		A27_PCR_MT_55C_A_8_R2.fastq	move SRS4213773_2.fastq renamed/A27_PCR_MT_55C_A_8_R2.fastq
A6-45-1	SRS4213684	214662453	SRS4213684	A6	A64	_	DePCR	_	MT	_	45C	_	A	_	1	_	R1	.fastq	_1		A64_DePCR_MT_45C_A_1_R1.fastq	move SRS4213684_1.fastq renamed/A64_DePCR_MT_45C_A_1_R1.fastq
A6-45-1	SRS4213684	214662453	SRS4213684	A6	A64	_	DePCR	_	MT	_	45C	_	A	_	1	_	R2	.fastq	_2		A64_DePCR_MT_45C_A_1_R2.fastq	move SRS4213684_2.fastq renamed/A64_DePCR_MT_45C_A_1_R2.fastq
A6-45-2	SRS4213685	214639444	SRS4213685	A6	A64	_	DePCR	_	MT	_	45C	_	A	_	2	_	R1	.fastq	_1		A64_DePCR_MT_45C_A_2_R1.fastq	move SRS4213685_1.fastq renamed/A64_DePCR_MT_45C_A_2_R1.fastq
A6-45-2	SRS4213685	214639444	SRS4213685	A6	A64	_	DePCR	_	MT	_	45C	_	A	_	2	_	R2	.fastq	_2		A64_DePCR_MT_45C_A_2_R2.fastq	move SRS4213685_2.fastq renamed/A64_DePCR_MT_45C_A_2_R2.fastq
A6-45-3	SRS4213687	214646447	SRS4213687	A6	A64	_	DePCR	_	MT	_	45C	_	A	_	3	_	R1	.fastq	_1		A64_DePCR_MT_45C_A_3_R1.fastq	move SRS4213687_1.fastq renamed/A64_DePCR_MT_45C_A_3_R1.fastq
A6-45-3	SRS4213687	214646447	SRS4213687	A6	A64	_	DePCR	_	MT	_	45C	_	A	_	3	_	R2	.fastq	_2		A64_DePCR_MT_45C_A_3_R2.fastq	move SRS4213687_2.fastq renamed/A64_DePCR_MT_45C_A_3_R2.fastq
A6-45-4	SRS4213686	214640438	SRS4213686	A6	A64	_	DePCR	_	MT	_	45C	_	A	_	4	_	R1	.fastq	_1		A64_DePCR_MT_45C_A_4_R1.fastq	move SRS4213686_1.fastq renamed/A64_DePCR_MT_45C_A_4_R1.fastq
A6-45-4	SRS4213686	214640438	SRS4213686	A6	A64	_	DePCR	_	MT	_	45C	_	A	_	4	_	R2	.fastq	_2		A64_DePCR_MT_45C_A_4_R2.fastq	move SRS4213686_2.fastq renamed/A64_DePCR_MT_45C_A_4_R2.fastq
A6-45-5	SRS4213688	214644438	SRS4213688	A6	A64	_	DePCR	_	MT	_	45C	_	A	_	5	_	R1	.fastq	_1		A64_DePCR_MT_45C_A_5_R1.fastq	move SRS4213688_1.fastq renamed/A64_DePCR_MT_45C_A_5_R1.fastq
A6-45-5	SRS4213688	214644438	SRS4213688	A6	A64	_	DePCR	_	MT	_	45C	_	A	_	5	_	R2	.fastq	_2		A64_DePCR_MT_45C_A_5_R2.fastq	move SRS4213688_2.fastq renamed/A64_DePCR_MT_45C_A_5_R2.fastq
A6-45-6	SRS4213689	214657446	SRS4213689	A6	A64	_	DePCR	_	MT	_	45C	_	A	_	6	_	R1	.fastq	_1		A64_DePCR_MT_45C_A_6_R1.fastq	move SRS4213689_1.fastq renamed/A64_DePCR_MT_45C_A_6_R1.fastq
A6-45-6	SRS4213689	214657446	SRS4213689	A6	A64	_	DePCR	_	MT	_	45C	_	A	_	6	_	R2	.fastq	_2		A64_DePCR_MT_45C_A_6_R2.fastq	move SRS4213689_2.fastq renamed/A64_DePCR_MT_45C_A_6_R2.fastq
A6-45-7	SRS4213539	214653448	SRS4213539	A6	A64	_	DePCR	_	MT	_	45C	_	A	_	7	_	R1	.fastq	_1		A64_DePCR_MT_45C_A_7_R1.fastq	move SRS4213539_1.fastq renamed/A64_DePCR_MT_45C_A_7_R1.fastq
A6-45-7	SRS4213539	214653448	SRS4213539	A6	A64	_	DePCR	_	MT	_	45C	_	A	_	7	_	R2	.fastq	_2		A64_DePCR_MT_45C_A_7_R2.fastq	move SRS4213539_2.fastq renamed/A64_DePCR_MT_45C_A_7_R2.fastq
A6-45-8	SRS4213538	214662454	SRS4213538	A6	A64	_	DePCR	_	MT	_	45C	_	A	_	8	_	R1	.fastq	_1		A64_DePCR_MT_45C_A_8_R1.fastq	move SRS4213538_1.fastq renamed/A64_DePCR_MT_45C_A_8_R1.fastq
A6-45-8	SRS4213538	214662454	SRS4213538	A6	A64	_	DePCR	_	MT	_	45C	_	A	_	8	_	R2	.fastq	_2		A64_DePCR_MT_45C_A_8_R2.fastq	move SRS4213538_2.fastq renamed/A64_DePCR_MT_45C_A_8_R2.fastq
A6-55-1	SRS4213537	214648455	SRS4213537	A6	A64	_	DePCR	_	MT	_	55C	_	A	_	1	_	R1	.fastq	_1		A64_DePCR_MT_55C_A_1_R1.fastq	move SRS4213537_1.fastq renamed/A64_DePCR_MT_55C_A_1_R1.fastq
A6-55-1	SRS4213537	214648455	SRS4213537	A6	A64	_	DePCR	_	MT	_	55C	_	A	_	1	_	R2	.fastq	_2		A64_DePCR_MT_55C_A_1_R2.fastq	move SRS4213537_2.fastq renamed/A64_DePCR_MT_55C_A_1_R2.fastq
A6-55-2	SRS4213536	214659463	SRS4213536	A6	A64	_	DePCR	_	MT	_	55C	_	A	_	2	_	R1	.fastq	_1		A64_DePCR_MT_55C_A_2_R1.fastq	move SRS4213536_1.fastq renamed/A64_DePCR_MT_55C_A_2_R1.fastq
A6-55-2	SRS4213536	214659463	SRS4213536	A6	A64	_	DePCR	_	MT	_	55C	_	A	_	2	_	R2	.fastq	_2		A64_DePCR_MT_55C_A_2_R2.fastq	move SRS4213536_2.fastq renamed/A64_DePCR_MT_55C_A_2_R2.fastq
A6-55-3	SRS4213535	214646471	SRS4213535	A6	A64	_	DePCR	_	MT	_	55C	_	A	_	3	_	R1	.fastq	_1		A64_DePCR_MT_55C_A_3_R1.fastq	move SRS4213535_1.fastq renamed/A64_DePCR_MT_55C_A_3_R1.fastq
A6-55-3	SRS4213535	214646471	SRS4213535	A6	A64	_	DePCR	_	MT	_	55C	_	A	_	3	_	R2	.fastq	_2		A64_DePCR_MT_55C_A_3_R2.fastq	move SRS4213535_2.fastq renamed/A64_DePCR_MT_55C_A_3_R2.fastq
A6-55-4	SRS4213534	214657467	SRS4213534	A6	A64	_	DePCR	_	MT	_	55C	_	A	_	4	_	R1	.fastq	_1		A64_DePCR_MT_55C_A_4_R1.fastq	move SRS4213534_1.fastq renamed/A64_DePCR_MT_55C_A_4_R1.fastq
A6-55-4	SRS4213534	214657467	SRS4213534	A6	A64	_	DePCR	_	MT	_	55C	_	A	_	4	_	R2	.fastq	_2		A64_DePCR_MT_55C_A_4_R2.fastq	move SRS4213534_2.fastq renamed/A64_DePCR_MT_55C_A_4_R2.fastq
A6-55-5	SRS4213533	214660466	SRS4213533	A6	A64	_	DePCR	_	MT	_	55C	_	A	_	5	_	R1	.fastq	_1		A64_DePCR_MT_55C_A_5_R1.fastq	move SRS4213533_1.fastq renamed/A64_DePCR_MT_55C_A_5_R1.fastq
A6-55-5	SRS4213533	214660466	SRS4213533	A6	A64	_	DePCR	_	MT	_	55C	_	A	_	5	_	R2	.fastq	_2		A64_DePCR_MT_55C_A_5_R2.fastq	move SRS4213533_2.fastq renamed/A64_DePCR_MT_55C_A_5_R2.fastq
A6-55-6	SRS4213532	214648456	SRS4213532	A6	A64	_	DePCR	_	MT	_	55C	_	A	_	6	_	R1	.fastq	_1		A64_DePCR_MT_55C_A_6_R1.fastq	move SRS4213532_1.fastq renamed/A64_DePCR_MT_55C_A_6_R1.fastq
A6-55-6	SRS4213532	214648456	SRS4213532	A6	A64	_	DePCR	_	MT	_	55C	_	A	_	6	_	R2	.fastq	_2		A64_DePCR_MT_55C_A_6_R2.fastq	move SRS4213532_2.fastq renamed/A64_DePCR_MT_55C_A_6_R2.fastq
A6-55-7	SRS4213372	214652466	SRS4213372	A6	A64	_	DePCR	_	MT	_	55C	_	A	_	7	_	R1	.fastq	_1		A64_DePCR_MT_55C_A_7_R1.fastq	move SRS4213372_1.fastq renamed/A64_DePCR_MT_55C_A_7_R1.fastq
A6-55-7	SRS4213372	214652466	SRS4213372	A6	A64	_	DePCR	_	MT	_	55C	_	A	_	7	_	R2	.fastq	_2		A64_DePCR_MT_55C_A_7_R2.fastq	move SRS4213372_2.fastq renamed/A64_DePCR_MT_55C_A_7_R2.fastq
A6-55-8	SRS4213540	214664451	SRS4213540	A6	A64	_	DePCR	_	MT	_	55C	_	A	_	8	_	R1	.fastq	_1		A64_DePCR_MT_55C_A_8_R1.fastq	move SRS4213540_1.fastq renamed/A64_DePCR_MT_55C_A_8_R1.fastq
A6-55-8	SRS4213540	214664451	SRS4213540	A6	A64	_	DePCR	_	MT	_	55C	_	A	_	8	_	R2	.fastq	_2		A64_DePCR_MT_55C_A_8_R2.fastq	move SRS4213540_2.fastq renamed/A64_DePCR_MT_55C_A_8_R2.fastq
A6S-45-1	SRS4213334	217231264	SRS4213334	A6	A64	_	PCR	_	MT	_	45C	_	A	_	1	_	R1	.fastq	_1		A64_PCR_MT_45C_A_1_R1.fastq	move SRS4213334_1.fastq renamed/A64_PCR_MT_45C_A_1_R1.fastq
A6S-45-1	SRS4213334	217231264	SRS4213334	A6	A64	_	PCR	_	MT	_	45C	_	A	_	1	_	R2	.fastq	_2		A64_PCR_MT_45C_A_1_R2.fastq	move SRS4213334_2.fastq renamed/A64_PCR_MT_45C_A_1_R2.fastq
A6S-45-2	SRS4213335	217244130	SRS4213335	A6	A64	_	PCR	_	MT	_	45C	_	A	_	2	_	R1	.fastq	_1		A64_PCR_MT_45C_A_2_R1.fastq	move SRS4213335_1.fastq renamed/A64_PCR_MT_45C_A_2_R1.fastq
A6S-45-2	SRS4213335	217244130	SRS4213335	A6	A64	_	PCR	_	MT	_	45C	_	A	_	2	_	R2	.fastq	_2		A64_PCR_MT_45C_A_2_R2.fastq	move SRS4213335_2.fastq renamed/A64_PCR_MT_45C_A_2_R2.fastq
A6S-45-3	SRS4213332	217246062	SRS4213332	A6	A64	_	PCR	_	MT	_	45C	_	A	_	3	_	R1	.fastq	_1		A64_PCR_MT_45C_A_3_R1.fastq	move SRS4213332_1.fastq renamed/A64_PCR_MT_45C_A_3_R1.fastq
A6S-45-3	SRS4213332	217246062	SRS4213332	A6	A64	_	PCR	_	MT	_	45C	_	A	_	3	_	R2	.fastq	_2		A64_PCR_MT_45C_A_3_R2.fastq	move SRS4213332_2.fastq renamed/A64_PCR_MT_45C_A_3_R2.fastq
A6S-45-4	SRS4213333	217232228	SRS4213333	A6	A64	_	PCR	_	MT	_	45C	_	A	_	4	_	R1	.fastq	_1		A64_PCR_MT_45C_A_4_R1.fastq	move SRS4213333_1.fastq renamed/A64_PCR_MT_45C_A_4_R1.fastq
A6S-45-4	SRS4213333	217232228	SRS4213333	A6	A64	_	PCR	_	MT	_	45C	_	A	_	4	_	R2	.fastq	_2		A64_PCR_MT_45C_A_4_R2.fastq	move SRS4213333_2.fastq renamed/A64_PCR_MT_45C_A_4_R2.fastq
A6S-45-5	SRS4213338	217229262	SRS4213338	A6	A64	_	PCR	_	MT	_	45C	_	A	_	5	_	R1	.fastq	_1		A64_PCR_MT_45C_A_5_R1.fastq	move SRS4213338_1.fastq renamed/A64_PCR_MT_45C_A_5_R1.fastq
A6S-45-5	SRS4213338	217229262	SRS4213338	A6	A64	_	PCR	_	MT	_	45C	_	A	_	5	_	R2	.fastq	_2		A64_PCR_MT_45C_A_5_R2.fastq	move SRS4213338_2.fastq renamed/A64_PCR_MT_45C_A_5_R2.fastq
A6S-45-6	SRS4213339	217243143	SRS4213339	A6	A64	_	PCR	_	MT	_	45C	_	A	_	6	_	R1	.fastq	_1		A64_PCR_MT_45C_A_6_R1.fastq	move SRS4213339_1.fastq renamed/A64_PCR_MT_45C_A_6_R1.fastq
A6S-45-6	SRS4213339	217243143	SRS4213339	A6	A64	_	PCR	_	MT	_	45C	_	A	_	6	_	R2	.fastq	_2		A64_PCR_MT_45C_A_6_R2.fastq	move SRS4213339_2.fastq renamed/A64_PCR_MT_45C_A_6_R2.fastq
A6S-45-7	SRS4213336	217245127	SRS4213336	A6	A64	_	PCR	_	MT	_	45C	_	A	_	7	_	R1	.fastq	_1		A64_PCR_MT_45C_A_7_R1.fastq	move SRS4213336_1.fastq renamed/A64_PCR_MT_45C_A_7_R1.fastq
A6S-45-7	SRS4213336	217245127	SRS4213336	A6	A64	_	PCR	_	MT	_	45C	_	A	_	7	_	R2	.fastq	_2		A64_PCR_MT_45C_A_7_R2.fastq	move SRS4213336_2.fastq renamed/A64_PCR_MT_45C_A_7_R2.fastq
A6S-45-8	SRS4213337	217246064	SRS4213337	A6	A64	_	PCR	_	MT	_	45C	_	A	_	8	_	R1	.fastq	_1		A64_PCR_MT_45C_A_8_R1.fastq	move SRS4213337_1.fastq renamed/A64_PCR_MT_45C_A_8_R1.fastq
A6S-45-8	SRS4213337	217246064	SRS4213337	A6	A64	_	PCR	_	MT	_	45C	_	A	_	8	_	R2	.fastq	_2		A64_PCR_MT_45C_A_8_R2.fastq	move SRS4213337_2.fastq renamed/A64_PCR_MT_45C_A_8_R2.fastq
A6S-55-1	SRS4213330	217229274	SRS4213330	A6	A64	_	PCR	_	MT	_	55C	_	A	_	1	_	R1	.fastq	_1		A64_PCR_MT_55C_A_1_R1.fastq	move SRS4213330_1.fastq renamed/A64_PCR_MT_55C_A_1_R1.fastq
A6S-55-1	SRS4213330	217229274	SRS4213330	A6	A64	_	PCR	_	MT	_	55C	_	A	_	1	_	R2	.fastq	_2		A64_PCR_MT_55C_A_1_R2.fastq	move SRS4213330_2.fastq renamed/A64_PCR_MT_55C_A_1_R2.fastq
A6S-55-2	SRS4213331	217237227	SRS4213331	A6	A64	_	PCR	_	MT	_	55C	_	A	_	2	_	R1	.fastq	_1		A64_PCR_MT_55C_A_2_R1.fastq	move SRS4213331_1.fastq renamed/A64_PCR_MT_55C_A_2_R1.fastq
A6S-55-2	SRS4213331	217237227	SRS4213331	A6	A64	_	PCR	_	MT	_	55C	_	A	_	2	_	R2	.fastq	_2		A64_PCR_MT_55C_A_2_R2.fastq	move SRS4213331_2.fastq renamed/A64_PCR_MT_55C_A_2_R2.fastq
A6S-55-3	SRS4213483	217249037	SRS4213483	A6	A64	_	PCR	_	MT	_	55C	_	A	_	3	_	R1	.fastq	_1		A64_PCR_MT_55C_A_3_R1.fastq	move SRS4213483_1.fastq renamed/A64_PCR_MT_55C_A_3_R1.fastq
A6S-55-3	SRS4213483	217249037	SRS4213483	A6	A64	_	PCR	_	MT	_	55C	_	A	_	3	_	R2	.fastq	_2		A64_PCR_MT_55C_A_3_R2.fastq	move SRS4213483_2.fastq renamed/A64_PCR_MT_55C_A_3_R2.fastq
A6S-55-4	SRS4213482	217246073	SRS4213482	A6	A64	_	PCR	_	MT	_	55C	_	A	_	4	_	R1	.fastq	_1		A64_PCR_MT_55C_A_4_R1.fastq	move SRS4213482_1.fastq renamed/A64_PCR_MT_55C_A_4_R1.fastq
A6S-55-4	SRS4213482	217246073	SRS4213482	A6	A64	_	PCR	_	MT	_	55C	_	A	_	4	_	R2	.fastq	_2		A64_PCR_MT_55C_A_4_R2.fastq	move SRS4213482_2.fastq renamed/A64_PCR_MT_55C_A_4_R2.fastq
A6S-55-5	SRS4213485	217247053	SRS4213485	A6	A64	_	PCR	_	MT	_	55C	_	A	_	5	_	R1	.fastq	_1		A64_PCR_MT_55C_A_5_R1.fastq	move SRS4213485_1.fastq renamed/A64_PCR_MT_55C_A_5_R1.fastq
A6S-55-5	SRS4213485	217247053	SRS4213485	A6	A64	_	PCR	_	MT	_	55C	_	A	_	5	_	R2	.fastq	_2		A64_PCR_MT_55C_A_5_R2.fastq	move SRS4213485_2.fastq renamed/A64_PCR_MT_55C_A_5_R2.fastq
A6S-55-6	SRS4213484	217232242	SRS4213484	A6	A64	_	PCR	_	MT	_	55C	_	A	_	6	_	R1	.fastq	_1		A64_PCR_MT_55C_A_6_R1.fastq	move SRS4213484_1.fastq renamed/A64_PCR_MT_55C_A_6_R1.fastq
A6S-55-6	SRS4213484	217232242	SRS4213484	A6	A64	_	PCR	_	MT	_	55C	_	A	_	6	_	R2	.fastq	_2		A64_PCR_MT_55C_A_6_R2.fastq	move SRS4213484_2.fastq renamed/A64_PCR_MT_55C_A_6_R2.fastq
A6S-55-7	SRS4213487	217229275	SRS4213487	A6	A64	_	PCR	_	MT	_	55C	_	A	_	7	_	R1	.fastq	_1		A64_PCR_MT_55C_A_7_R1.fastq	move SRS4213487_1.fastq renamed/A64_PCR_MT_55C_A_7_R1.fastq
A6S-55-7	SRS4213487	217229275	SRS4213487	A6	A64	_	PCR	_	MT	_	55C	_	A	_	7	_	R2	.fastq	_2		A64_PCR_MT_55C_A_7_R2.fastq	move SRS4213487_2.fastq renamed/A64_PCR_MT_55C_A_7_R2.fastq
A6S-55-8	SRS4213486	217239216	SRS4213486	A6	A64	_	PCR	_	MT	_	55C	_	A	_	8	_	R1	.fastq	_1		A64_PCR_MT_55C_A_8_R1.fastq	move SRS4213486_1.fastq renamed/A64_PCR_MT_55C_A_8_R1.fastq
A6S-55-8	SRS4213486	217239216	SRS4213486	A6	A64	_	PCR	_	MT	_	55C	_	A	_	8	_	R2	.fastq	_2		A64_PCR_MT_55C_A_8_R2.fastq	move SRS4213486_2.fastq renamed/A64_PCR_MT_55C_A_8_R2.fastq
B1-45-1	SRS4213720	214659450	SRS4213720	B1	B01	_	DePCR	_	MT	_	45C	_	B	_	1	_	R1	.fastq	_1		B01_DePCR_MT_45C_B_1_R1.fastq	move SRS4213720_1.fastq renamed/B01_DePCR_MT_45C_B_1_R1.fastq
B1-45-1	SRS4213720	214659450	SRS4213720	B1	B01	_	DePCR	_	MT	_	45C	_	B	_	1	_	R2	.fastq	_2		B01_DePCR_MT_45C_B_1_R2.fastq	move SRS4213720_2.fastq renamed/B01_DePCR_MT_45C_B_1_R2.fastq
B1-45-2	SRS4213721	214660449	SRS4213721	B1	B01	_	DePCR	_	MT	_	45C	_	B	_	2	_	R1	.fastq	_1		B01_DePCR_MT_45C_B_2_R1.fastq	move SRS4213721_1.fastq renamed/B01_DePCR_MT_45C_B_2_R1.fastq
B1-45-2	SRS4213721	214660449	SRS4213721	B1	B01	_	DePCR	_	MT	_	45C	_	B	_	2	_	R2	.fastq	_2		B01_DePCR_MT_45C_B_2_R2.fastq	move SRS4213721_2.fastq renamed/B01_DePCR_MT_45C_B_2_R2.fastq
B1-45-3	SRS4213717	214661450	SRS4213717	B1	B01	_	DePCR	_	MT	_	45C	_	B	_	3	_	R1	.fastq	_1		B01_DePCR_MT_45C_B_3_R1.fastq	move SRS4213717_1.fastq renamed/B01_DePCR_MT_45C_B_3_R1.fastq
B1-45-3	SRS4213717	214661450	SRS4213717	B1	B01	_	DePCR	_	MT	_	45C	_	B	_	3	_	R2	.fastq	_2		B01_DePCR_MT_45C_B_3_R2.fastq	move SRS4213717_2.fastq renamed/B01_DePCR_MT_45C_B_3_R2.fastq
B1-45-4	SRS4213719	214646449	SRS4213719	B1	B01	_	DePCR	_	MT	_	45C	_	B	_	4	_	R1	.fastq	_1		B01_DePCR_MT_45C_B_4_R1.fastq	move SRS4213719_1.fastq renamed/B01_DePCR_MT_45C_B_4_R1.fastq
B1-45-4	SRS4213719	214646449	SRS4213719	B1	B01	_	DePCR	_	MT	_	45C	_	B	_	4	_	R2	.fastq	_2		B01_DePCR_MT_45C_B_4_R2.fastq	move SRS4213719_2.fastq renamed/B01_DePCR_MT_45C_B_4_R2.fastq
B1-45-5	SRS4213716	214654444	SRS4213716	B1	B01	_	DePCR	_	MT	_	45C	_	B	_	5	_	R1	.fastq	_1		B01_DePCR_MT_45C_B_5_R1.fastq	move SRS4213716_1.fastq renamed/B01_DePCR_MT_45C_B_5_R1.fastq
B1-45-5	SRS4213716	214654444	SRS4213716	B1	B01	_	DePCR	_	MT	_	45C	_	B	_	5	_	R2	.fastq	_2		B01_DePCR_MT_45C_B_5_R2.fastq	move SRS4213716_2.fastq renamed/B01_DePCR_MT_45C_B_5_R2.fastq
B1-45-6	SRS4213718	214647442	SRS4213718	B1	B01	_	DePCR	_	MT	_	45C	_	B	_	6	_	R1	.fastq	_1		B01_DePCR_MT_45C_B_6_R1.fastq	move SRS4213718_1.fastq renamed/B01_DePCR_MT_45C_B_6_R1.fastq
B1-45-6	SRS4213718	214647442	SRS4213718	B1	B01	_	DePCR	_	MT	_	45C	_	B	_	6	_	R2	.fastq	_2		B01_DePCR_MT_45C_B_6_R2.fastq	move SRS4213718_2.fastq renamed/B01_DePCR_MT_45C_B_6_R2.fastq
B1-45-7	SRS4213714	214647443	SRS4213714	B1	B01	_	DePCR	_	MT	_	45C	_	B	_	7	_	R1	.fastq	_1		B01_DePCR_MT_45C_B_7_R1.fastq	move SRS4213714_1.fastq renamed/B01_DePCR_MT_45C_B_7_R1.fastq
B1-45-7	SRS4213714	214647443	SRS4213714	B1	B01	_	DePCR	_	MT	_	45C	_	B	_	7	_	R2	.fastq	_2		B01_DePCR_MT_45C_B_7_R2.fastq	move SRS4213714_2.fastq renamed/B01_DePCR_MT_45C_B_7_R2.fastq
B1-45-8	SRS4213715	214650446	SRS4213715	B1	B01	_	DePCR	_	MT	_	45C	_	B	_	8	_	R1	.fastq	_1		B01_DePCR_MT_45C_B_8_R1.fastq	move SRS4213715_1.fastq renamed/B01_DePCR_MT_45C_B_8_R1.fastq
B1-45-8	SRS4213715	214650446	SRS4213715	B1	B01	_	DePCR	_	MT	_	45C	_	B	_	8	_	R2	.fastq	_2		B01_DePCR_MT_45C_B_8_R2.fastq	move SRS4213715_2.fastq renamed/B01_DePCR_MT_45C_B_8_R2.fastq
B1-55-1	SRS4213712	214647462	SRS4213712	B1	B01	_	DePCR	_	MT	_	55C	_	B	_	1	_	R1	.fastq	_1		B01_DePCR_MT_55C_B_1_R1.fastq	move SRS4213712_1.fastq renamed/B01_DePCR_MT_55C_B_1_R1.fastq
B1-55-1	SRS4213712	214647462	SRS4213712	B1	B01	_	DePCR	_	MT	_	55C	_	B	_	1	_	R2	.fastq	_2		B01_DePCR_MT_55C_B_1_R2.fastq	move SRS4213712_2.fastq renamed/B01_DePCR_MT_55C_B_1_R2.fastq
B1-55-2	SRS4213713	214653463	SRS4213713	B1	B01	_	DePCR	_	MT	_	55C	_	B	_	2	_	R1	.fastq	_1		B01_DePCR_MT_55C_B_2_R1.fastq	move SRS4213713_1.fastq renamed/B01_DePCR_MT_55C_B_2_R1.fastq
B1-55-2	SRS4213713	214653463	SRS4213713	B1	B01	_	DePCR	_	MT	_	55C	_	B	_	2	_	R2	.fastq	_2		B01_DePCR_MT_55C_B_2_R2.fastq	move SRS4213713_2.fastq renamed/B01_DePCR_MT_55C_B_2_R2.fastq
B1-55-3	SRS4213545	214645452	SRS4213545	B1	B01	_	DePCR	_	MT	_	55C	_	B	_	3	_	R1	.fastq	_1		B01_DePCR_MT_55C_B_3_R1.fastq	move SRS4213545_1.fastq renamed/B01_DePCR_MT_55C_B_3_R1.fastq
B1-55-3	SRS4213545	214645452	SRS4213545	B1	B01	_	DePCR	_	MT	_	55C	_	B	_	3	_	R2	.fastq	_2		B01_DePCR_MT_55C_B_3_R2.fastq	move SRS4213545_2.fastq renamed/B01_DePCR_MT_55C_B_3_R2.fastq
B1-55-4	SRS4213734	214647464	SRS4213734	B1	B01	_	DePCR	_	MT	_	55C	_	B	_	4	_	R1	.fastq	_1		B01_DePCR_MT_55C_B_4_R1.fastq	move SRS4213734_1.fastq renamed/B01_DePCR_MT_55C_B_4_R1.fastq
B1-55-4	SRS4213734	214647464	SRS4213734	B1	B01	_	DePCR	_	MT	_	55C	_	B	_	4	_	R2	.fastq	_2		B01_DePCR_MT_55C_B_4_R2.fastq	move SRS4213734_2.fastq renamed/B01_DePCR_MT_55C_B_4_R2.fastq
B1-55-5	SRS4213572	214653464	SRS4213572	B1	B01	_	DePCR	_	MT	_	55C	_	B	_	5	_	R1	.fastq	_1		B01_DePCR_MT_55C_B_5_R1.fastq	move SRS4213572_1.fastq renamed/B01_DePCR_MT_55C_B_5_R1.fastq
B1-55-5	SRS4213572	214653464	SRS4213572	B1	B01	_	DePCR	_	MT	_	55C	_	B	_	5	_	R2	.fastq	_2		B01_DePCR_MT_55C_B_5_R2.fastq	move SRS4213572_2.fastq renamed/B01_DePCR_MT_55C_B_5_R2.fastq
B1-55-6	SRS4213570	214644455	SRS4213570	B1	B01	_	DePCR	_	MT	_	55C	_	B	_	6	_	R1	.fastq	_1		B01_DePCR_MT_55C_B_6_R1.fastq	move SRS4213570_1.fastq renamed/B01_DePCR_MT_55C_B_6_R1.fastq
B1-55-6	SRS4213570	214644455	SRS4213570	B1	B01	_	DePCR	_	MT	_	55C	_	B	_	6	_	R2	.fastq	_2		B01_DePCR_MT_55C_B_6_R2.fastq	move SRS4213570_2.fastq renamed/B01_DePCR_MT_55C_B_6_R2.fastq
B1-55-7	SRS4213565	214648458	SRS4213565	B1	B01	_	DePCR	_	MT	_	55C	_	B	_	7	_	R1	.fastq	_1		B01_DePCR_MT_55C_B_7_R1.fastq	move SRS4213565_1.fastq renamed/B01_DePCR_MT_55C_B_7_R1.fastq
B1-55-7	SRS4213565	214648458	SRS4213565	B1	B01	_	DePCR	_	MT	_	55C	_	B	_	7	_	R2	.fastq	_2		B01_DePCR_MT_55C_B_7_R2.fastq	move SRS4213565_2.fastq renamed/B01_DePCR_MT_55C_B_7_R2.fastq
B1-55-8	SRS4213564	214662469	SRS4213564	B1	B01	_	DePCR	_	MT	_	55C	_	B	_	8	_	R1	.fastq	_1		B01_DePCR_MT_55C_B_8_R1.fastq	move SRS4213564_1.fastq renamed/B01_DePCR_MT_55C_B_8_R1.fastq
B1-55-8	SRS4213564	214662469	SRS4213564	B1	B01	_	DePCR	_	MT	_	55C	_	B	_	8	_	R2	.fastq	_2		B01_DePCR_MT_55C_B_8_R2.fastq	move SRS4213564_2.fastq renamed/B01_DePCR_MT_55C_B_8_R2.fastq
B1S-45-1	SRS4213489	217236223	SRS4213489	B1	B01	_	PCR	_	MT	_	45C	_	B	_	1	_	R1	.fastq	_1		B01_PCR_MT_45C_B_1_R1.fastq	move SRS4213489_1.fastq renamed/B01_PCR_MT_45C_B_1_R1.fastq
B1S-45-1	SRS4213489	217236223	SRS4213489	B1	B01	_	PCR	_	MT	_	45C	_	B	_	1	_	R2	.fastq	_2		B01_PCR_MT_45C_B_1_R2.fastq	move SRS4213489_2.fastq renamed/B01_PCR_MT_45C_B_1_R2.fastq
B1S-45-2	SRS4213488	217244143	SRS4213488	B1	B01	_	PCR	_	MT	_	45C	_	B	_	2	_	R1	.fastq	_1		B01_PCR_MT_45C_B_2_R1.fastq	move SRS4213488_1.fastq renamed/B01_PCR_MT_45C_B_2_R1.fastq
B1S-45-2	SRS4213488	217244143	SRS4213488	B1	B01	_	PCR	_	MT	_	45C	_	B	_	2	_	R2	.fastq	_2		B01_PCR_MT_45C_B_2_R2.fastq	move SRS4213488_2.fastq renamed/B01_PCR_MT_45C_B_2_R2.fastq
B1S-45-3	SRS4213481	217244144	SRS4213481	B1	B01	_	PCR	_	MT	_	45C	_	B	_	3	_	R1	.fastq	_1		B01_PCR_MT_45C_B_3_R1.fastq	move SRS4213481_1.fastq renamed/B01_PCR_MT_45C_B_3_R1.fastq
B1S-45-3	SRS4213481	217244144	SRS4213481	B1	B01	_	PCR	_	MT	_	45C	_	B	_	3	_	R2	.fastq	_2		B01_PCR_MT_45C_B_3_R2.fastq	move SRS4213481_2.fastq renamed/B01_PCR_MT_45C_B_3_R2.fastq
B1S-45-4	SRS4213480	217240186	SRS4213480	B1	B01	_	PCR	_	MT	_	45C	_	B	_	4	_	R1	.fastq	_1		B01_PCR_MT_45C_B_4_R1.fastq	move SRS4213480_1.fastq renamed/B01_PCR_MT_45C_B_4_R1.fastq
B1S-45-4	SRS4213480	217240186	SRS4213480	B1	B01	_	PCR	_	MT	_	45C	_	B	_	4	_	R2	.fastq	_2		B01_PCR_MT_45C_B_4_R2.fastq	move SRS4213480_2.fastq renamed/B01_PCR_MT_45C_B_4_R2.fastq
B1S-45-5	SRS4213546	217237232	SRS4213546	B1	B01	_	PCR	_	MT	_	45C	_	B	_	5	_	R1	.fastq	_1		B01_PCR_MT_45C_B_5_R1.fastq	move SRS4213546_1.fastq renamed/B01_PCR_MT_45C_B_5_R1.fastq
B1S-45-5	SRS4213546	217237232	SRS4213546	B1	B01	_	PCR	_	MT	_	45C	_	B	_	5	_	R2	.fastq	_2		B01_PCR_MT_45C_B_5_R2.fastq	move SRS4213546_2.fastq renamed/B01_PCR_MT_45C_B_5_R2.fastq
B1S-45-6	SRS4213547	217246076	SRS4213547	B1	B01	_	PCR	_	MT	_	45C	_	B	_	6	_	R1	.fastq	_1		B01_PCR_MT_45C_B_6_R1.fastq	move SRS4213547_1.fastq renamed/B01_PCR_MT_45C_B_6_R1.fastq
B1S-45-6	SRS4213547	217246076	SRS4213547	B1	B01	_	PCR	_	MT	_	45C	_	B	_	6	_	R2	.fastq	_2		B01_PCR_MT_45C_B_6_R2.fastq	move SRS4213547_2.fastq renamed/B01_PCR_MT_45C_B_6_R2.fastq
B1S-45-7	SRS4213548	217231276	SRS4213548	B1	B01	_	PCR	_	MT	_	45C	_	B	_	7	_	R1	.fastq	_1		B01_PCR_MT_45C_B_7_R1.fastq	move SRS4213548_1.fastq renamed/B01_PCR_MT_45C_B_7_R1.fastq
B1S-45-7	SRS4213548	217231276	SRS4213548	B1	B01	_	PCR	_	MT	_	45C	_	B	_	7	_	R2	.fastq	_2		B01_PCR_MT_45C_B_7_R2.fastq	move SRS4213548_2.fastq renamed/B01_PCR_MT_45C_B_7_R2.fastq
B1S-45-8	SRS4213549	217231277	SRS4213549	B1	B01	_	PCR	_	MT	_	45C	_	B	_	8	_	R1	.fastq	_1		B01_PCR_MT_45C_B_8_R1.fastq	move SRS4213549_1.fastq renamed/B01_PCR_MT_45C_B_8_R1.fastq
B1S-45-8	SRS4213549	217231277	SRS4213549	B1	B01	_	PCR	_	MT	_	45C	_	B	_	8	_	R2	.fastq	_2		B01_PCR_MT_45C_B_8_R2.fastq	move SRS4213549_2.fastq renamed/B01_PCR_MT_45C_B_8_R2.fastq
B1S-55-1	SRS4213550	217245168	SRS4213550	B1	B01	_	PCR	_	MT	_	55C	_	B	_	1	_	R1	.fastq	_1		B01_PCR_MT_55C_B_1_R1.fastq	move SRS4213550_1.fastq renamed/B01_PCR_MT_55C_B_1_R1.fastq
B1S-55-1	SRS4213550	217245168	SRS4213550	B1	B01	_	PCR	_	MT	_	55C	_	B	_	1	_	R2	.fastq	_2		B01_PCR_MT_55C_B_1_R2.fastq	move SRS4213550_2.fastq renamed/B01_PCR_MT_55C_B_1_R2.fastq
B1S-55-2	SRS4213551	217238210	SRS4213551	B1	B01	_	PCR	_	MT	_	55C	_	B	_	2	_	R1	.fastq	_1		B01_PCR_MT_55C_B_2_R1.fastq	move SRS4213551_1.fastq renamed/B01_PCR_MT_55C_B_2_R1.fastq
B1S-55-2	SRS4213551	217238210	SRS4213551	B1	B01	_	PCR	_	MT	_	55C	_	B	_	2	_	R2	.fastq	_2		B01_PCR_MT_55C_B_2_R2.fastq	move SRS4213551_2.fastq renamed/B01_PCR_MT_55C_B_2_R2.fastq
B1S-55-3	SRS4213552	217232270	SRS4213552	B1	B01	_	PCR	_	MT	_	55C	_	B	_	3	_	R1	.fastq	_1		B01_PCR_MT_55C_B_3_R1.fastq	move SRS4213552_1.fastq renamed/B01_PCR_MT_55C_B_3_R1.fastq
B1S-55-3	SRS4213552	217232270	SRS4213552	B1	B01	_	PCR	_	MT	_	55C	_	B	_	3	_	R2	.fastq	_2		B01_PCR_MT_55C_B_3_R2.fastq	move SRS4213552_2.fastq renamed/B01_PCR_MT_55C_B_3_R2.fastq
B1S-55-4	SRS4213553	217239243	SRS4213553	B1	B01	_	PCR	_	MT	_	55C	_	B	_	4	_	R1	.fastq	_1		B01_PCR_MT_55C_B_4_R1.fastq	move SRS4213553_1.fastq renamed/B01_PCR_MT_55C_B_4_R1.fastq
B1S-55-4	SRS4213553	217239243	SRS4213553	B1	B01	_	PCR	_	MT	_	55C	_	B	_	4	_	R2	.fastq	_2		B01_PCR_MT_55C_B_4_R2.fastq	move SRS4213553_2.fastq renamed/B01_PCR_MT_55C_B_4_R2.fastq
B1S-55-5	SRS4213554	217245169	SRS4213554	B1	B01	_	PCR	_	MT	_	55C	_	B	_	5	_	R1	.fastq	_1		B01_PCR_MT_55C_B_5_R1.fastq	move SRS4213554_1.fastq renamed/B01_PCR_MT_55C_B_5_R1.fastq
B1S-55-5	SRS4213554	217245169	SRS4213554	B1	B01	_	PCR	_	MT	_	55C	_	B	_	5	_	R2	.fastq	_2		B01_PCR_MT_55C_B_5_R2.fastq	move SRS4213554_2.fastq renamed/B01_PCR_MT_55C_B_5_R2.fastq
B1S-55-6	SRS4213555	217245170	SRS4213555	B1	B01	_	PCR	_	MT	_	55C	_	B	_	6	_	R1	.fastq	_1		B01_PCR_MT_55C_B_6_R1.fastq	move SRS4213555_1.fastq renamed/B01_PCR_MT_55C_B_6_R1.fastq
B1S-55-6	SRS4213555	217245170	SRS4213555	B1	B01	_	PCR	_	MT	_	55C	_	B	_	6	_	R2	.fastq	_2		B01_PCR_MT_55C_B_6_R2.fastq	move SRS4213555_2.fastq renamed/B01_PCR_MT_55C_B_6_R2.fastq
B1S-55-7	SRS4213710	217242176	SRS4213710	B1	B01	_	PCR	_	MT	_	55C	_	B	_	7	_	R1	.fastq	_1		B01_PCR_MT_55C_B_7_R1.fastq	move SRS4213710_1.fastq renamed/B01_PCR_MT_55C_B_7_R1.fastq
B1S-55-7	SRS4213710	217242176	SRS4213710	B1	B01	_	PCR	_	MT	_	55C	_	B	_	7	_	R2	.fastq	_2		B01_PCR_MT_55C_B_7_R2.fastq	move SRS4213710_2.fastq renamed/B01_PCR_MT_55C_B_7_R2.fastq
B1S-55-8	SRS4213709	217249068	SRS4213709	B1	B01	_	PCR	_	MT	_	55C	_	B	_	8	_	R1	.fastq	_1		B01_PCR_MT_55C_B_8_R1.fastq	move SRS4213709_1.fastq renamed/B01_PCR_MT_55C_B_8_R1.fastq
B1S-55-8	SRS4213709	217249068	SRS4213709	B1	B01	_	PCR	_	MT	_	55C	_	B	_	8	_	R2	.fastq	_2		B01_PCR_MT_55C_B_8_R2.fastq	move SRS4213709_2.fastq renamed/B01_PCR_MT_55C_B_8_R2.fastq
B3-45-1	SRS4213579	214659453	SRS4213579	B3	B09	_	DePCR	_	MT	_	45C	_	B	_	1	_	R1	.fastq	_1		B09_DePCR_MT_45C_B_1_R1.fastq	move SRS4213579_1.fastq renamed/B09_DePCR_MT_45C_B_1_R1.fastq
B3-45-1	SRS4213579	214659453	SRS4213579	B3	B09	_	DePCR	_	MT	_	45C	_	B	_	1	_	R2	.fastq	_2		B09_DePCR_MT_45C_B_1_R2.fastq	move SRS4213579_2.fastq renamed/B09_DePCR_MT_45C_B_1_R2.fastq
B3-45-2	SRS4213577	214662455	SRS4213577	B3	B09	_	DePCR	_	MT	_	45C	_	B	_	2	_	R1	.fastq	_1		B09_DePCR_MT_45C_B_2_R1.fastq	move SRS4213577_1.fastq renamed/B09_DePCR_MT_45C_B_2_R1.fastq
B3-45-2	SRS4213577	214662455	SRS4213577	B3	B09	_	DePCR	_	MT	_	45C	_	B	_	2	_	R2	.fastq	_2		B09_DePCR_MT_45C_B_2_R2.fastq	move SRS4213577_2.fastq renamed/B09_DePCR_MT_45C_B_2_R2.fastq
B3-45-3	SRS4213573	214639447	SRS4213573	B3	B09	_	DePCR	_	MT	_	45C	_	B	_	3	_	R1	.fastq	_1		B09_DePCR_MT_45C_B_3_R1.fastq	move SRS4213573_1.fastq renamed/B09_DePCR_MT_45C_B_3_R1.fastq
B3-45-3	SRS4213573	214639447	SRS4213573	B3	B09	_	DePCR	_	MT	_	45C	_	B	_	3	_	R2	.fastq	_2		B09_DePCR_MT_45C_B_3_R2.fastq	move SRS4213573_2.fastq renamed/B09_DePCR_MT_45C_B_3_R2.fastq
B3-45-4	SRS4213571	214646454	SRS4213571	B3	B09	_	DePCR	_	MT	_	45C	_	B	_	4	_	R1	.fastq	_1		B09_DePCR_MT_45C_B_4_R1.fastq	move SRS4213571_1.fastq renamed/B09_DePCR_MT_45C_B_4_R1.fastq
B3-45-4	SRS4213571	214646454	SRS4213571	B3	B09	_	DePCR	_	MT	_	45C	_	B	_	4	_	R2	.fastq	_2		B09_DePCR_MT_45C_B_4_R2.fastq	move SRS4213571_2.fastq renamed/B09_DePCR_MT_45C_B_4_R2.fastq
B3-45-5	SRS4213575	214644439	SRS4213575	B3	B09	_	DePCR	_	MT	_	45C	_	B	_	5	_	R1	.fastq	_1		B09_DePCR_MT_45C_B_5_R1.fastq	move SRS4213575_1.fastq renamed/B09_DePCR_MT_45C_B_5_R1.fastq
B3-45-5	SRS4213575	214644439	SRS4213575	B3	B09	_	DePCR	_	MT	_	45C	_	B	_	5	_	R2	.fastq	_2		B09_DePCR_MT_45C_B_5_R2.fastq	move SRS4213575_2.fastq renamed/B09_DePCR_MT_45C_B_5_R2.fastq
B3-45-6	SRS4213574	214648444	SRS4213574	B3	B09	_	DePCR	_	MT	_	45C	_	B	_	6	_	R1	.fastq	_1		B09_DePCR_MT_45C_B_6_R1.fastq	move SRS4213574_1.fastq renamed/B09_DePCR_MT_45C_B_6_R1.fastq
B3-45-6	SRS4213574	214648444	SRS4213574	B3	B09	_	DePCR	_	MT	_	45C	_	B	_	6	_	R2	.fastq	_2		B09_DePCR_MT_45C_B_6_R2.fastq	move SRS4213574_2.fastq renamed/B09_DePCR_MT_45C_B_6_R2.fastq
B3-45-7	SRS4213581	214648445	SRS4213581	B3	B09	_	DePCR	_	MT	_	45C	_	B	_	7	_	R1	.fastq	_1		B09_DePCR_MT_45C_B_7_R1.fastq	move SRS4213581_1.fastq renamed/B09_DePCR_MT_45C_B_7_R1.fastq
B3-45-7	SRS4213581	214648445	SRS4213581	B3	B09	_	DePCR	_	MT	_	45C	_	B	_	7	_	R2	.fastq	_2		B09_DePCR_MT_45C_B_7_R2.fastq	move SRS4213581_2.fastq renamed/B09_DePCR_MT_45C_B_7_R2.fastq
B3-45-8	SRS4213580	214644440	SRS4213580	B3	B09	_	DePCR	_	MT	_	45C	_	B	_	8	_	R1	.fastq	_1		B09_DePCR_MT_45C_B_8_R1.fastq	move SRS4213580_1.fastq renamed/B09_DePCR_MT_45C_B_8_R1.fastq
B3-45-8	SRS4213580	214644440	SRS4213580	B3	B09	_	DePCR	_	MT	_	45C	_	B	_	8	_	R2	.fastq	_2		B09_DePCR_MT_45C_B_8_R2.fastq	move SRS4213580_2.fastq renamed/B09_DePCR_MT_45C_B_8_R2.fastq
B3-55-1	SRS4213722	214645454	SRS4213722	B3	B09	_	DePCR	_	MT	_	55C	_	B	_	1	_	R1	.fastq	_1		B09_DePCR_MT_55C_B_1_R1.fastq	move SRS4213722_1.fastq renamed/B09_DePCR_MT_55C_B_1_R1.fastq
B3-55-1	SRS4213722	214645454	SRS4213722	B3	B09	_	DePCR	_	MT	_	55C	_	B	_	1	_	R2	.fastq	_2		B09_DePCR_MT_55C_B_1_R2.fastq	move SRS4213722_2.fastq renamed/B09_DePCR_MT_55C_B_1_R2.fastq
B3-55-2	SRS4213723	214662470	SRS4213723	B3	B09	_	DePCR	_	MT	_	55C	_	B	_	2	_	R1	.fastq	_1		B09_DePCR_MT_55C_B_2_R1.fastq	move SRS4213723_1.fastq renamed/B09_DePCR_MT_55C_B_2_R1.fastq
B3-55-2	SRS4213723	214662470	SRS4213723	B3	B09	_	DePCR	_	MT	_	55C	_	B	_	2	_	R2	.fastq	_2		B09_DePCR_MT_55C_B_2_R2.fastq	move SRS4213723_2.fastq renamed/B09_DePCR_MT_55C_B_2_R2.fastq
B3-55-3	SRS4213724	214653465	SRS4213724	B3	B09	_	DePCR	_	MT	_	55C	_	B	_	3	_	R1	.fastq	_1		B09_DePCR_MT_55C_B_3_R1.fastq	move SRS4213724_1.fastq renamed/B09_DePCR_MT_55C_B_3_R1.fastq
B3-55-3	SRS4213724	214653465	SRS4213724	B3	B09	_	DePCR	_	MT	_	55C	_	B	_	3	_	R2	.fastq	_2		B09_DePCR_MT_55C_B_3_R2.fastq	move SRS4213724_2.fastq renamed/B09_DePCR_MT_55C_B_3_R2.fastq
B3-55-4	SRS4213725	214663452	SRS4213725	B3	B09	_	DePCR	_	MT	_	55C	_	B	_	4	_	R1	.fastq	_1		B09_DePCR_MT_55C_B_4_R1.fastq	move SRS4213725_1.fastq renamed/B09_DePCR_MT_55C_B_4_R1.fastq
B3-55-4	SRS4213725	214663452	SRS4213725	B3	B09	_	DePCR	_	MT	_	55C	_	B	_	4	_	R2	.fastq	_2		B09_DePCR_MT_55C_B_4_R2.fastq	move SRS4213725_2.fastq renamed/B09_DePCR_MT_55C_B_4_R2.fastq
B3-55-5	SRS4213727	214645457	SRS4213727	B3	B09	_	DePCR	_	MT	_	55C	_	B	_	5	_	R1	.fastq	_1		B09_DePCR_MT_55C_B_5_R1.fastq	move SRS4213727_1.fastq renamed/B09_DePCR_MT_55C_B_5_R1.fastq
B3-55-5	SRS4213727	214645457	SRS4213727	B3	B09	_	DePCR	_	MT	_	55C	_	B	_	5	_	R2	.fastq	_2		B09_DePCR_MT_55C_B_5_R2.fastq	move SRS4213727_2.fastq renamed/B09_DePCR_MT_55C_B_5_R2.fastq
B3-55-6	SRS4213726	214645458	SRS4213726	B3	B09	_	DePCR	_	MT	_	55C	_	B	_	6	_	R1	.fastq	_1		B09_DePCR_MT_55C_B_6_R1.fastq	move SRS4213726_1.fastq renamed/B09_DePCR_MT_55C_B_6_R1.fastq
B3-55-6	SRS4213726	214645458	SRS4213726	B3	B09	_	DePCR	_	MT	_	55C	_	B	_	6	_	R2	.fastq	_2		B09_DePCR_MT_55C_B_6_R2.fastq	move SRS4213726_2.fastq renamed/B09_DePCR_MT_55C_B_6_R2.fastq
B3-55-7	SRS4213728	214651462	SRS4213728	B3	B09	_	DePCR	_	MT	_	55C	_	B	_	7	_	R1	.fastq	_1		B09_DePCR_MT_55C_B_7_R1.fastq	move SRS4213728_1.fastq renamed/B09_DePCR_MT_55C_B_7_R1.fastq
B3-55-7	SRS4213728	214651462	SRS4213728	B3	B09	_	DePCR	_	MT	_	55C	_	B	_	7	_	R2	.fastq	_2		B09_DePCR_MT_55C_B_7_R2.fastq	move SRS4213728_2.fastq renamed/B09_DePCR_MT_55C_B_7_R2.fastq
B3-55-8	SRS4213729	214663453	SRS4213729	B3	B09	_	DePCR	_	MT	_	55C	_	B	_	8	_	R1	.fastq	_1		B09_DePCR_MT_55C_B_8_R1.fastq	move SRS4213729_1.fastq renamed/B09_DePCR_MT_55C_B_8_R1.fastq
B3-55-8	SRS4213729	214663453	SRS4213729	B3	B09	_	DePCR	_	MT	_	55C	_	B	_	8	_	R2	.fastq	_2		B09_DePCR_MT_55C_B_8_R2.fastq	move SRS4213729_2.fastq renamed/B09_DePCR_MT_55C_B_8_R2.fastq
B3S-45-1	SRS4213282	217241187	SRS4213282	B3	B09	_	PCR	_	MT	_	45C	_	B	_	1	_	R1	.fastq	_1		B09_PCR_MT_45C_B_1_R1.fastq	move SRS4213282_1.fastq renamed/B09_PCR_MT_45C_B_1_R1.fastq
B3S-45-1	SRS4213282	217241187	SRS4213282	B3	B09	_	PCR	_	MT	_	45C	_	B	_	1	_	R2	.fastq	_2		B09_PCR_MT_45C_B_1_R2.fastq	move SRS4213282_2.fastq renamed/B09_PCR_MT_45C_B_1_R2.fastq
B3S-45-2	SRS4213283	217247058	SRS4213283	B3	B09	_	PCR	_	MT	_	45C	_	B	_	2	_	R1	.fastq	_1		B09_PCR_MT_45C_B_2_R1.fastq	move SRS4213283_1.fastq renamed/B09_PCR_MT_45C_B_2_R1.fastq
B3S-45-2	SRS4213283	217247058	SRS4213283	B3	B09	_	PCR	_	MT	_	45C	_	B	_	2	_	R2	.fastq	_2		B09_PCR_MT_45C_B_2_R2.fastq	move SRS4213283_2.fastq renamed/B09_PCR_MT_45C_B_2_R2.fastq
B3S-45-3	SRS4213403	217243159	SRS4213403	B3	B09	_	PCR	_	MT	_	45C	_	B	_	3	_	R1	.fastq	_1		B09_PCR_MT_45C_B_3_R1.fastq	move SRS4213403_1.fastq renamed/B09_PCR_MT_45C_B_3_R1.fastq
B3S-45-3	SRS4213403	217243159	SRS4213403	B3	B09	_	PCR	_	MT	_	45C	_	B	_	3	_	R2	.fastq	_2		B09_PCR_MT_45C_B_3_R2.fastq	move SRS4213403_2.fastq renamed/B09_PCR_MT_45C_B_3_R2.fastq
B3S-45-4	SRS4213402	217241188	SRS4213402	B3	B09	_	PCR	_	MT	_	45C	_	B	_	4	_	R1	.fastq	_1		B09_PCR_MT_45C_B_4_R1.fastq	move SRS4213402_1.fastq renamed/B09_PCR_MT_45C_B_4_R1.fastq
B3S-45-4	SRS4213402	217241188	SRS4213402	B3	B09	_	PCR	_	MT	_	45C	_	B	_	4	_	R2	.fastq	_2		B09_PCR_MT_45C_B_4_R2.fastq	move SRS4213402_2.fastq renamed/B09_PCR_MT_45C_B_4_R2.fastq
B3S-45-5	SRS4213405	217249044	SRS4213405	B3	B09	_	PCR	_	MT	_	45C	_	B	_	5	_	R1	.fastq	_1		B09_PCR_MT_45C_B_5_R1.fastq	move SRS4213405_1.fastq renamed/B09_PCR_MT_45C_B_5_R1.fastq
B3S-45-5	SRS4213405	217249044	SRS4213405	B3	B09	_	PCR	_	MT	_	45C	_	B	_	5	_	R2	.fastq	_2		B09_PCR_MT_45C_B_5_R2.fastq	move SRS4213405_2.fastq renamed/B09_PCR_MT_45C_B_5_R2.fastq
B3S-45-6	SRS4213404	217249045	SRS4213404	B3	B09	_	PCR	_	MT	_	45C	_	B	_	6	_	R1	.fastq	_1		B09_PCR_MT_45C_B_6_R1.fastq	move SRS4213404_1.fastq renamed/B09_PCR_MT_45C_B_6_R1.fastq
B3S-45-6	SRS4213404	217249045	SRS4213404	B3	B09	_	PCR	_	MT	_	45C	_	B	_	6	_	R2	.fastq	_2		B09_PCR_MT_45C_B_6_R2.fastq	move SRS4213404_2.fastq renamed/B09_PCR_MT_45C_B_6_R2.fastq
B3S-45-7	SRS4213399	217241189	SRS4213399	B3	B09	_	PCR	_	MT	_	45C	_	B	_	7	_	R1	.fastq	_1		B09_PCR_MT_45C_B_7_R1.fastq	move SRS4213399_1.fastq renamed/B09_PCR_MT_45C_B_7_R1.fastq
B3S-45-7	SRS4213399	217241189	SRS4213399	B3	B09	_	PCR	_	MT	_	45C	_	B	_	7	_	R2	.fastq	_2		B09_PCR_MT_45C_B_7_R2.fastq	move SRS4213399_2.fastq renamed/B09_PCR_MT_45C_B_7_R2.fastq
B3S-45-8	SRS4213398	217232254	SRS4213398	B3	B09	_	PCR	_	MT	_	45C	_	B	_	8	_	R1	.fastq	_1		B09_PCR_MT_45C_B_8_R1.fastq	move SRS4213398_1.fastq renamed/B09_PCR_MT_45C_B_8_R1.fastq
B3S-45-8	SRS4213398	217232254	SRS4213398	B3	B09	_	PCR	_	MT	_	45C	_	B	_	8	_	R2	.fastq	_2		B09_PCR_MT_45C_B_8_R2.fastq	move SRS4213398_2.fastq renamed/B09_PCR_MT_45C_B_8_R2.fastq
B3S-55-1	SRS4213401	217236243	SRS4213401	B3	B09	_	PCR	_	MT	_	55C	_	B	_	1	_	R1	.fastq	_1		B09_PCR_MT_55C_B_1_R1.fastq	move SRS4213401_1.fastq renamed/B09_PCR_MT_55C_B_1_R1.fastq
B3S-55-1	SRS4213401	217236243	SRS4213401	B3	B09	_	PCR	_	MT	_	55C	_	B	_	1	_	R2	.fastq	_2		B09_PCR_MT_55C_B_1_R2.fastq	move SRS4213401_2.fastq renamed/B09_PCR_MT_55C_B_1_R2.fastq
B3S-55-2	SRS4213400	217240211	SRS4213400	B3	B09	_	PCR	_	MT	_	55C	_	B	_	2	_	R1	.fastq	_1		B09_PCR_MT_55C_B_2_R1.fastq	move SRS4213400_1.fastq renamed/B09_PCR_MT_55C_B_2_R1.fastq
B3S-55-2	SRS4213400	217240211	SRS4213400	B3	B09	_	PCR	_	MT	_	55C	_	B	_	2	_	R2	.fastq	_2		B09_PCR_MT_55C_B_2_R2.fastq	move SRS4213400_2.fastq renamed/B09_PCR_MT_55C_B_2_R2.fastq
B3S-55-3	SRS4213407	217245174	SRS4213407	B3	B09	_	PCR	_	MT	_	55C	_	B	_	3	_	R1	.fastq	_1		B09_PCR_MT_55C_B_3_R1.fastq	move SRS4213407_1.fastq renamed/B09_PCR_MT_55C_B_3_R1.fastq
B3S-55-3	SRS4213407	217245174	SRS4213407	B3	B09	_	PCR	_	MT	_	55C	_	B	_	3	_	R2	.fastq	_2		B09_PCR_MT_55C_B_3_R2.fastq	move SRS4213407_2.fastq renamed/B09_PCR_MT_55C_B_3_R2.fastq
B3S-55-4	SRS4213406	217236246	SRS4213406	B3	B09	_	PCR	_	MT	_	55C	_	B	_	4	_	R1	.fastq	_1		B09_PCR_MT_55C_B_4_R1.fastq	move SRS4213406_1.fastq renamed/B09_PCR_MT_55C_B_4_R1.fastq
B3S-55-4	SRS4213406	217236246	SRS4213406	B3	B09	_	PCR	_	MT	_	55C	_	B	_	4	_	R2	.fastq	_2		B09_PCR_MT_55C_B_4_R2.fastq	move SRS4213406_2.fastq renamed/B09_PCR_MT_55C_B_4_R2.fastq
B3S-55-5	SRS4213515	217244176	SRS4213515	B3	B09	_	PCR	_	MT	_	55C	_	B	_	5	_	R1	.fastq	_1		B09_PCR_MT_55C_B_5_R1.fastq	move SRS4213515_1.fastq renamed/B09_PCR_MT_55C_B_5_R1.fastq
B3S-55-5	SRS4213515	217244176	SRS4213515	B3	B09	_	PCR	_	MT	_	55C	_	B	_	5	_	R2	.fastq	_2		B09_PCR_MT_55C_B_5_R2.fastq	move SRS4213515_2.fastq renamed/B09_PCR_MT_55C_B_5_R2.fastq
B3S-55-6	SRS4213517	217238216	SRS4213517	B3	B09	_	PCR	_	MT	_	55C	_	B	_	6	_	R1	.fastq	_1		B09_PCR_MT_55C_B_6_R1.fastq	move SRS4213517_1.fastq renamed/B09_PCR_MT_55C_B_6_R1.fastq
B3S-55-6	SRS4213517	217238216	SRS4213517	B3	B09	_	PCR	_	MT	_	55C	_	B	_	6	_	R2	.fastq	_2		B09_PCR_MT_55C_B_6_R2.fastq	move SRS4213517_2.fastq renamed/B09_PCR_MT_55C_B_6_R2.fastq
B3S-55-7	SRS4213518	217241210	SRS4213518	B3	B09	_	PCR	_	MT	_	55C	_	B	_	7	_	R1	.fastq	_1		B09_PCR_MT_55C_B_7_R1.fastq	move SRS4213518_1.fastq renamed/B09_PCR_MT_55C_B_7_R1.fastq
B3S-55-7	SRS4213518	217241210	SRS4213518	B3	B09	_	PCR	_	MT	_	55C	_	B	_	7	_	R2	.fastq	_2		B09_PCR_MT_55C_B_7_R2.fastq	move SRS4213518_2.fastq renamed/B09_PCR_MT_55C_B_7_R2.fastq
B3S-55-8	SRS4213519	217243182	SRS4213519	B3	B09	_	PCR	_	MT	_	55C	_	B	_	8	_	R1	.fastq	_1		B09_PCR_MT_55C_B_8_R1.fastq	move SRS4213519_1.fastq renamed/B09_PCR_MT_55C_B_8_R1.fastq
B3S-55-8	SRS4213519	217243182	SRS4213519	B3	B09	_	PCR	_	MT	_	55C	_	B	_	8	_	R2	.fastq	_2		B09_PCR_MT_55C_B_8_R2.fastq	move SRS4213519_2.fastq renamed/B09_PCR_MT_55C_B_8_R2.fastq
B2-45-1	SRS4213567	214651449	SRS4213567	B2	B10	_	DePCR	_	MT	_	45C	_	B	_	1	_	R1	.fastq	_1		B10_DePCR_MT_45C_B_1_R1.fastq	move SRS4213567_1.fastq renamed/B10_DePCR_MT_45C_B_1_R1.fastq
B2-45-1	SRS4213567	214651449	SRS4213567	B2	B10	_	DePCR	_	MT	_	45C	_	B	_	1	_	R2	.fastq	_2		B10_DePCR_MT_45C_B_1_R2.fastq	move SRS4213567_2.fastq renamed/B10_DePCR_MT_45C_B_1_R2.fastq
B2-45-2	SRS4213566	214656455	SRS4213566	B2	B10	_	DePCR	_	MT	_	45C	_	B	_	2	_	R1	.fastq	_1		B10_DePCR_MT_45C_B_2_R1.fastq	move SRS4213566_1.fastq renamed/B10_DePCR_MT_45C_B_2_R1.fastq
B2-45-2	SRS4213566	214656455	SRS4213566	B2	B10	_	DePCR	_	MT	_	45C	_	B	_	2	_	R2	.fastq	_2		B10_DePCR_MT_45C_B_2_R2.fastq	move SRS4213566_2.fastq renamed/B10_DePCR_MT_45C_B_2_R2.fastq
B2-45-3	SRS4213595	214652452	SRS4213595	B2	B10	_	DePCR	_	MT	_	45C	_	B	_	3	_	R1	.fastq	_1		B10_DePCR_MT_45C_B_3_R1.fastq	move SRS4213595_1.fastq renamed/B10_DePCR_MT_45C_B_3_R1.fastq
B2-45-3	SRS4213595	214652452	SRS4213595	B2	B10	_	DePCR	_	MT	_	45C	_	B	_	3	_	R2	.fastq	_2		B10_DePCR_MT_45C_B_3_R2.fastq	move SRS4213595_2.fastq renamed/B10_DePCR_MT_45C_B_3_R2.fastq
B2-45-4	SRS4213594	214645443	SRS4213594	B2	B10	_	DePCR	_	MT	_	45C	_	B	_	4	_	R1	.fastq	_1		B10_DePCR_MT_45C_B_4_R1.fastq	move SRS4213594_1.fastq renamed/B10_DePCR_MT_45C_B_4_R1.fastq
B2-45-4	SRS4213594	214645443	SRS4213594	B2	B10	_	DePCR	_	MT	_	45C	_	B	_	4	_	R2	.fastq	_2		B10_DePCR_MT_45C_B_4_R2.fastq	move SRS4213594_2.fastq renamed/B10_DePCR_MT_45C_B_4_R2.fastq
B2-45-5	SRS4213434	214653450	SRS4213434	B2	B10	_	DePCR	_	MT	_	45C	_	B	_	5	_	R1	.fastq	_1		B10_DePCR_MT_45C_B_5_R1.fastq	move SRS4213434_1.fastq renamed/B10_DePCR_MT_45C_B_5_R1.fastq
B2-45-5	SRS4213434	214653450	SRS4213434	B2	B10	_	DePCR	_	MT	_	45C	_	B	_	5	_	R2	.fastq	_2		B10_DePCR_MT_45C_B_5_R2.fastq	move SRS4213434_2.fastq renamed/B10_DePCR_MT_45C_B_5_R2.fastq
B2-45-6	SRS4213435	214647445	SRS4213435	B2	B10	_	DePCR	_	MT	_	45C	_	B	_	6	_	R1	.fastq	_1		B10_DePCR_MT_45C_B_6_R1.fastq	move SRS4213435_1.fastq renamed/B10_DePCR_MT_45C_B_6_R1.fastq
B2-45-6	SRS4213435	214647445	SRS4213435	B2	B10	_	DePCR	_	MT	_	45C	_	B	_	6	_	R2	.fastq	_2		B10_DePCR_MT_45C_B_6_R2.fastq	move SRS4213435_2.fastq renamed/B10_DePCR_MT_45C_B_6_R2.fastq
B2-45-7	SRS4213432	214650448	SRS4213432	B2	B10	_	DePCR	_	MT	_	45C	_	B	_	7	_	R1	.fastq	_1		B10_DePCR_MT_45C_B_7_R1.fastq	move SRS4213432_1.fastq renamed/B10_DePCR_MT_45C_B_7_R1.fastq
B2-45-7	SRS4213432	214650448	SRS4213432	B2	B10	_	DePCR	_	MT	_	45C	_	B	_	7	_	R2	.fastq	_2		B10_DePCR_MT_45C_B_7_R2.fastq	move SRS4213432_2.fastq renamed/B10_DePCR_MT_45C_B_7_R2.fastq
B2-45-8	SRS4213433	214660452	SRS4213433	B2	B10	_	DePCR	_	MT	_	45C	_	B	_	8	_	R1	.fastq	_1		B10_DePCR_MT_45C_B_8_R1.fastq	move SRS4213433_1.fastq renamed/B10_DePCR_MT_45C_B_8_R1.fastq
B2-45-8	SRS4213433	214660452	SRS4213433	B2	B10	_	DePCR	_	MT	_	45C	_	B	_	8	_	R2	.fastq	_2		B10_DePCR_MT_45C_B_8_R2.fastq	move SRS4213433_2.fastq renamed/B10_DePCR_MT_45C_B_8_R2.fastq
B2-55-1	SRS4213430	214650465	SRS4213430	B2	B10	_	DePCR	_	MT	_	55C	_	B	_	1	_	R1	.fastq	_1		B10_DePCR_MT_55C_B_1_R1.fastq	move SRS4213430_1.fastq renamed/B10_DePCR_MT_55C_B_1_R1.fastq
B2-55-1	SRS4213430	214650465	SRS4213430	B2	B10	_	DePCR	_	MT	_	55C	_	B	_	1	_	R2	.fastq	_2		B10_DePCR_MT_55C_B_1_R2.fastq	move SRS4213430_2.fastq renamed/B10_DePCR_MT_55C_B_1_R2.fastq
B2-55-2	SRS4213431	214657468	SRS4213431	B2	B10	_	DePCR	_	MT	_	55C	_	B	_	2	_	R1	.fastq	_1		B10_DePCR_MT_55C_B_2_R1.fastq	move SRS4213431_1.fastq renamed/B10_DePCR_MT_55C_B_2_R1.fastq
B2-55-2	SRS4213431	214657468	SRS4213431	B2	B10	_	DePCR	_	MT	_	55C	_	B	_	2	_	R2	.fastq	_2		B10_DePCR_MT_55C_B_2_R2.fastq	move SRS4213431_2.fastq renamed/B10_DePCR_MT_55C_B_2_R2.fastq
B2-55-3	SRS4213428	214644457	SRS4213428	B2	B10	_	DePCR	_	MT	_	55C	_	B	_	3	_	R1	.fastq	_1		B10_DePCR_MT_55C_B_3_R1.fastq	move SRS4213428_1.fastq renamed/B10_DePCR_MT_55C_B_3_R1.fastq
B2-55-3	SRS4213428	214644457	SRS4213428	B2	B10	_	DePCR	_	MT	_	55C	_	B	_	3	_	R2	.fastq	_2		B10_DePCR_MT_55C_B_3_R2.fastq	move SRS4213428_2.fastq renamed/B10_DePCR_MT_55C_B_3_R2.fastq
B2-55-4	SRS4213429	214656468	SRS4213429	B2	B10	_	DePCR	_	MT	_	55C	_	B	_	4	_	R1	.fastq	_1		B10_DePCR_MT_55C_B_4_R1.fastq	move SRS4213429_1.fastq renamed/B10_DePCR_MT_55C_B_4_R1.fastq
B2-55-4	SRS4213429	214656468	SRS4213429	B2	B10	_	DePCR	_	MT	_	55C	_	B	_	4	_	R2	.fastq	_2		B10_DePCR_MT_55C_B_4_R2.fastq	move SRS4213429_2.fastq renamed/B10_DePCR_MT_55C_B_4_R2.fastq
B2-55-5	SRS4213442	214648459	SRS4213442	B2	B10	_	DePCR	_	MT	_	55C	_	B	_	5	_	R1	.fastq	_1		B10_DePCR_MT_55C_B_5_R1.fastq	move SRS4213442_1.fastq renamed/B10_DePCR_MT_55C_B_5_R1.fastq
B2-55-5	SRS4213442	214648459	SRS4213442	B2	B10	_	DePCR	_	MT	_	55C	_	B	_	5	_	R2	.fastq	_2		B10_DePCR_MT_55C_B_5_R2.fastq	move SRS4213442_2.fastq renamed/B10_DePCR_MT_55C_B_5_R2.fastq
B2-55-6	SRS4213443	214654456	SRS4213443	B2	B10	_	DePCR	_	MT	_	55C	_	B	_	6	_	R1	.fastq	_1		B10_DePCR_MT_55C_B_6_R1.fastq	move SRS4213443_1.fastq renamed/B10_DePCR_MT_55C_B_6_R1.fastq
B2-55-6	SRS4213443	214654456	SRS4213443	B2	B10	_	DePCR	_	MT	_	55C	_	B	_	6	_	R2	.fastq	_2		B10_DePCR_MT_55C_B_6_R2.fastq	move SRS4213443_2.fastq renamed/B10_DePCR_MT_55C_B_6_R2.fastq
B2-55-7	SRS4213578	214660467	SRS4213578	B2	B10	_	DePCR	_	MT	_	55C	_	B	_	7	_	R1	.fastq	_1		B10_DePCR_MT_55C_B_7_R1.fastq	move SRS4213578_1.fastq renamed/B10_DePCR_MT_55C_B_7_R1.fastq
B2-55-7	SRS4213578	214660467	SRS4213578	B2	B10	_	DePCR	_	MT	_	55C	_	B	_	7	_	R2	.fastq	_2		B10_DePCR_MT_55C_B_7_R2.fastq	move SRS4213578_2.fastq renamed/B10_DePCR_MT_55C_B_7_R2.fastq
B2-55-8	SRS4213576	214646474	SRS4213576	B2	B10	_	DePCR	_	MT	_	55C	_	B	_	8	_	R1	.fastq	_1		B10_DePCR_MT_55C_B_8_R1.fastq	move SRS4213576_1.fastq renamed/B10_DePCR_MT_55C_B_8_R1.fastq
B2-55-8	SRS4213576	214646474	SRS4213576	B2	B10	_	DePCR	_	MT	_	55C	_	B	_	8	_	R2	.fastq	_2		B10_DePCR_MT_55C_B_8_R2.fastq	move SRS4213576_2.fastq renamed/B10_DePCR_MT_55C_B_8_R2.fastq
B2S-45-1	SRS4213708	217229278	SRS4213708	B2	B10	_	PCR	_	MT	_	45C	_	B	_	1	_	R1	.fastq	_1		B10_PCR_MT_45C_B_1_R1.fastq	move SRS4213708_1.fastq renamed/B10_PCR_MT_45C_B_1_R1.fastq
B2S-45-1	SRS4213708	217229278	SRS4213708	B2	B10	_	PCR	_	MT	_	45C	_	B	_	1	_	R2	.fastq	_2		B10_PCR_MT_45C_B_1_R2.fastq	move SRS4213708_2.fastq renamed/B10_PCR_MT_45C_B_1_R2.fastq
B2S-45-2	SRS4213706	217244147	SRS4213706	B2	B10	_	PCR	_	MT	_	45C	_	B	_	2	_	R1	.fastq	_1		B10_PCR_MT_45C_B_2_R1.fastq	move SRS4213706_1.fastq renamed/B10_PCR_MT_45C_B_2_R1.fastq
B2S-45-2	SRS4213706	217244147	SRS4213706	B2	B10	_	PCR	_	MT	_	45C	_	B	_	2	_	R2	.fastq	_2		B10_PCR_MT_45C_B_2_R2.fastq	move SRS4213706_2.fastq renamed/B10_PCR_MT_45C_B_2_R2.fastq
B2S-45-3	SRS4213707	217236229	SRS4213707	B2	B10	_	PCR	_	MT	_	45C	_	B	_	3	_	R1	.fastq	_1		B10_PCR_MT_45C_B_3_R1.fastq	move SRS4213707_1.fastq renamed/B10_PCR_MT_45C_B_3_R1.fastq
B2S-45-3	SRS4213707	217236229	SRS4213707	B2	B10	_	PCR	_	MT	_	45C	_	B	_	3	_	R2	.fastq	_2		B10_PCR_MT_45C_B_3_R2.fastq	move SRS4213707_2.fastq renamed/B10_PCR_MT_45C_B_3_R2.fastq
B2S-45-4	SRS4213705	217241185	SRS4213705	B2	B10	_	PCR	_	MT	_	45C	_	B	_	4	_	R1	.fastq	_1		B10_PCR_MT_45C_B_4_R1.fastq	move SRS4213705_1.fastq renamed/B10_PCR_MT_45C_B_4_R1.fastq
B2S-45-4	SRS4213705	217241185	SRS4213705	B2	B10	_	PCR	_	MT	_	45C	_	B	_	4	_	R2	.fastq	_2		B10_PCR_MT_45C_B_4_R2.fastq	move SRS4213705_2.fastq renamed/B10_PCR_MT_45C_B_4_R2.fastq
B2S-45-5	SRS4213704	217229280	SRS4213704	B2	B10	_	PCR	_	MT	_	45C	_	B	_	5	_	R1	.fastq	_1		B10_PCR_MT_45C_B_5_R1.fastq	move SRS4213704_1.fastq renamed/B10_PCR_MT_45C_B_5_R1.fastq
B2S-45-5	SRS4213704	217229280	SRS4213704	B2	B10	_	PCR	_	MT	_	45C	_	B	_	5	_	R2	.fastq	_2		B10_PCR_MT_45C_B_5_R2.fastq	move SRS4213704_2.fastq renamed/B10_PCR_MT_45C_B_5_R2.fastq
B2S-45-6	SRS4213703	217244148	SRS4213703	B2	B10	_	PCR	_	MT	_	45C	_	B	_	6	_	R1	.fastq	_1		B10_PCR_MT_45C_B_6_R1.fastq	move SRS4213703_1.fastq renamed/B10_PCR_MT_45C_B_6_R1.fastq
B2S-45-6	SRS4213703	217244148	SRS4213703	B2	B10	_	PCR	_	MT	_	45C	_	B	_	6	_	R2	.fastq	_2		B10_PCR_MT_45C_B_6_R2.fastq	move SRS4213703_2.fastq renamed/B10_PCR_MT_45C_B_6_R2.fastq
B2S-45-7	SRS4213702	217231282	SRS4213702	B2	B10	_	PCR	_	MT	_	45C	_	B	_	7	_	R1	.fastq	_1		B10_PCR_MT_45C_B_7_R1.fastq	move SRS4213702_1.fastq renamed/B10_PCR_MT_45C_B_7_R1.fastq
B2S-45-7	SRS4213702	217231282	SRS4213702	B2	B10	_	PCR	_	MT	_	45C	_	B	_	7	_	R2	.fastq	_2		B10_PCR_MT_45C_B_7_R2.fastq	move SRS4213702_2.fastq renamed/B10_PCR_MT_45C_B_7_R2.fastq
B2S-45-8	SRS4213701	217235219	SRS4213701	B2	B10	_	PCR	_	MT	_	45C	_	B	_	8	_	R1	.fastq	_1		B10_PCR_MT_45C_B_8_R1.fastq	move SRS4213701_1.fastq renamed/B10_PCR_MT_45C_B_8_R1.fastq
B2S-45-8	SRS4213701	217235219	SRS4213701	B2	B10	_	PCR	_	MT	_	45C	_	B	_	8	_	R2	.fastq	_2		B10_PCR_MT_45C_B_8_R2.fastq	move SRS4213701_2.fastq renamed/B10_PCR_MT_45C_B_8_R2.fastq
B2S-55-1	SRS4213280	217232272	SRS4213280	B2	B10	_	PCR	_	MT	_	55C	_	B	_	1	_	R1	.fastq	_1		B10_PCR_MT_55C_B_1_R1.fastq	move SRS4213280_1.fastq renamed/B10_PCR_MT_55C_B_1_R1.fastq
B2S-55-1	SRS4213280	217232272	SRS4213280	B2	B10	_	PCR	_	MT	_	55C	_	B	_	1	_	R2	.fastq	_2		B10_PCR_MT_55C_B_1_R2.fastq	move SRS4213280_2.fastq renamed/B10_PCR_MT_55C_B_1_R2.fastq
B2S-55-2	SRS4213281	217231297	SRS4213281	B2	B10	_	PCR	_	MT	_	55C	_	B	_	2	_	R1	.fastq	_1		B10_PCR_MT_55C_B_2_R1.fastq	move SRS4213281_1.fastq renamed/B10_PCR_MT_55C_B_2_R1.fastq
B2S-55-2	SRS4213281	217231297	SRS4213281	B2	B10	_	PCR	_	MT	_	55C	_	B	_	2	_	R2	.fastq	_2		B10_PCR_MT_55C_B_2_R2.fastq	move SRS4213281_2.fastq renamed/B10_PCR_MT_55C_B_2_R2.fastq
B2S-55-3	SRS4213278	217243179	SRS4213278	B2	B10	_	PCR	_	MT	_	55C	_	B	_	3	_	R1	.fastq	_1		B10_PCR_MT_55C_B_3_R1.fastq	move SRS4213278_1.fastq renamed/B10_PCR_MT_55C_B_3_R1.fastq
B2S-55-3	SRS4213278	217243179	SRS4213278	B2	B10	_	PCR	_	MT	_	55C	_	B	_	3	_	R2	.fastq	_2		B10_PCR_MT_55C_B_3_R2.fastq	move SRS4213278_2.fastq renamed/B10_PCR_MT_55C_B_3_R2.fastq
B2S-55-4	SRS4213279	217245172	SRS4213279	B2	B10	_	PCR	_	MT	_	55C	_	B	_	4	_	R1	.fastq	_1		B10_PCR_MT_55C_B_4_R1.fastq	move SRS4213279_1.fastq renamed/B10_PCR_MT_55C_B_4_R1.fastq
B2S-55-4	SRS4213279	217245172	SRS4213279	B2	B10	_	PCR	_	MT	_	55C	_	B	_	4	_	R2	.fastq	_2		B10_PCR_MT_55C_B_4_R2.fastq	move SRS4213279_2.fastq renamed/B10_PCR_MT_55C_B_4_R2.fastq
B2S-55-5	SRS4213276	217246098	SRS4213276	B2	B10	_	PCR	_	MT	_	55C	_	B	_	5	_	R1	.fastq	_1		B10_PCR_MT_55C_B_5_R1.fastq	move SRS4213276_1.fastq renamed/B10_PCR_MT_55C_B_5_R1.fastq
B2S-55-5	SRS4213276	217246098	SRS4213276	B2	B10	_	PCR	_	MT	_	55C	_	B	_	5	_	R2	.fastq	_2		B10_PCR_MT_55C_B_5_R2.fastq	move SRS4213276_2.fastq renamed/B10_PCR_MT_55C_B_5_R2.fastq
B2S-55-6	SRS4213277	217251042	SRS4213277	B2	B10	_	PCR	_	MT	_	55C	_	B	_	6	_	R1	.fastq	_1		B10_PCR_MT_55C_B_6_R1.fastq	move SRS4213277_1.fastq renamed/B10_PCR_MT_55C_B_6_R1.fastq
B2S-55-6	SRS4213277	217251042	SRS4213277	B2	B10	_	PCR	_	MT	_	55C	_	B	_	6	_	R2	.fastq	_2		B10_PCR_MT_55C_B_6_R2.fastq	move SRS4213277_2.fastq renamed/B10_PCR_MT_55C_B_6_R2.fastq
B2S-55-7	SRS4213274	217247085	SRS4213274	B2	B10	_	PCR	_	MT	_	55C	_	B	_	7	_	R1	.fastq	_1		B10_PCR_MT_55C_B_7_R1.fastq	move SRS4213274_1.fastq renamed/B10_PCR_MT_55C_B_7_R1.fastq
B2S-55-7	SRS4213274	217247085	SRS4213274	B2	B10	_	PCR	_	MT	_	55C	_	B	_	7	_	R2	.fastq	_2		B10_PCR_MT_55C_B_7_R2.fastq	move SRS4213274_2.fastq renamed/B10_PCR_MT_55C_B_7_R2.fastq
B2S-55-8	SRS4213275	217247086	SRS4213275	B2	B10	_	PCR	_	MT	_	55C	_	B	_	8	_	R1	.fastq	_1		B10_PCR_MT_55C_B_8_R1.fastq	move SRS4213275_1.fastq renamed/B10_PCR_MT_55C_B_8_R1.fastq
B2S-55-8	SRS4213275	217247086	SRS4213275	B2	B10	_	PCR	_	MT	_	55C	_	B	_	8	_	R2	.fastq	_2		B10_PCR_MT_55C_B_8_R2.fastq	move SRS4213275_2.fastq renamed/B10_PCR_MT_55C_B_8_R2.fastq
B4-45-1	SRS4213730	214656460	SRS4213730	B4	B27	_	DePCR	_	MT	_	45C	_	B	_	1	_	R1	.fastq	_1		B27_DePCR_MT_45C_B_1_R1.fastq	move SRS4213730_1.fastq renamed/B27_DePCR_MT_45C_B_1_R1.fastq
B4-45-1	SRS4213730	214656460	SRS4213730	B4	B27	_	DePCR	_	MT	_	45C	_	B	_	1	_	R2	.fastq	_2		B27_DePCR_MT_45C_B_1_R2.fastq	move SRS4213730_2.fastq renamed/B27_DePCR_MT_45C_B_1_R2.fastq
B4-45-2	SRS4213731	214657452	SRS4213731	B4	B27	_	DePCR	_	MT	_	45C	_	B	_	2	_	R1	.fastq	_1		B27_DePCR_MT_45C_B_2_R1.fastq	move SRS4213731_1.fastq renamed/B27_DePCR_MT_45C_B_2_R1.fastq
B4-45-2	SRS4213731	214657452	SRS4213731	B4	B27	_	DePCR	_	MT	_	45C	_	B	_	2	_	R2	.fastq	_2		B27_DePCR_MT_45C_B_2_R2.fastq	move SRS4213731_2.fastq renamed/B27_DePCR_MT_45C_B_2_R2.fastq
B4-45-3	SRS4213349	214662458	SRS4213349	B4	B27	_	DePCR	_	MT	_	45C	_	B	_	3	_	R1	.fastq	_1		B27_DePCR_MT_45C_B_3_R1.fastq	move SRS4213349_1.fastq renamed/B27_DePCR_MT_45C_B_3_R1.fastq
B4-45-3	SRS4213349	214662458	SRS4213349	B4	B27	_	DePCR	_	MT	_	45C	_	B	_	3	_	R2	.fastq	_2		B27_DePCR_MT_45C_B_3_R2.fastq	move SRS4213349_2.fastq renamed/B27_DePCR_MT_45C_B_3_R2.fastq
B4-45-4	SRS4213348	214662459	SRS4213348	B4	B27	_	DePCR	_	MT	_	45C	_	B	_	4	_	R1	.fastq	_1		B27_DePCR_MT_45C_B_4_R1.fastq	move SRS4213348_1.fastq renamed/B27_DePCR_MT_45C_B_4_R1.fastq
B4-45-4	SRS4213348	214662459	SRS4213348	B4	B27	_	DePCR	_	MT	_	45C	_	B	_	4	_	R2	.fastq	_2		B27_DePCR_MT_45C_B_4_R2.fastq	move SRS4213348_2.fastq renamed/B27_DePCR_MT_45C_B_4_R2.fastq
B4-45-5	SRS4213347	214647450	SRS4213347	B4	B27	_	DePCR	_	MT	_	45C	_	B	_	5	_	R1	.fastq	_1		B27_DePCR_MT_45C_B_5_R1.fastq	move SRS4213347_1.fastq renamed/B27_DePCR_MT_45C_B_5_R1.fastq
B4-45-5	SRS4213347	214647450	SRS4213347	B4	B27	_	DePCR	_	MT	_	45C	_	B	_	5	_	R2	.fastq	_2		B27_DePCR_MT_45C_B_5_R2.fastq	move SRS4213347_2.fastq renamed/B27_DePCR_MT_45C_B_5_R2.fastq
B4-45-6	SRS4213346	214653453	SRS4213346	B4	B27	_	DePCR	_	MT	_	45C	_	B	_	6	_	R1	.fastq	_1		B27_DePCR_MT_45C_B_6_R1.fastq	move SRS4213346_1.fastq renamed/B27_DePCR_MT_45C_B_6_R1.fastq
B4-45-6	SRS4213346	214653453	SRS4213346	B4	B27	_	DePCR	_	MT	_	45C	_	B	_	6	_	R2	.fastq	_2		B27_DePCR_MT_45C_B_6_R2.fastq	move SRS4213346_2.fastq renamed/B27_DePCR_MT_45C_B_6_R2.fastq
B4-45-7	SRS4213345	214657454	SRS4213345	B4	B27	_	DePCR	_	MT	_	45C	_	B	_	7	_	R1	.fastq	_1		B27_DePCR_MT_45C_B_7_R1.fastq	move SRS4213345_1.fastq renamed/B27_DePCR_MT_45C_B_7_R1.fastq
B4-45-7	SRS4213345	214657454	SRS4213345	B4	B27	_	DePCR	_	MT	_	45C	_	B	_	7	_	R2	.fastq	_2		B27_DePCR_MT_45C_B_7_R2.fastq	move SRS4213345_2.fastq renamed/B27_DePCR_MT_45C_B_7_R2.fastq
B4-45-8	SRS4213344	214661458	SRS4213344	B4	B27	_	DePCR	_	MT	_	45C	_	B	_	8	_	R1	.fastq	_1		B27_DePCR_MT_45C_B_8_R1.fastq	move SRS4213344_1.fastq renamed/B27_DePCR_MT_45C_B_8_R1.fastq
B4-45-8	SRS4213344	214661458	SRS4213344	B4	B27	_	DePCR	_	MT	_	45C	_	B	_	8	_	R2	.fastq	_2		B27_DePCR_MT_45C_B_8_R2.fastq	move SRS4213344_2.fastq renamed/B27_DePCR_MT_45C_B_8_R2.fastq
B4-55-1	SRS4213343	214663454	SRS4213343	B4	B27	_	DePCR	_	MT	_	55C	_	B	_	1	_	R1	.fastq	_1		B27_DePCR_MT_55C_B_1_R1.fastq	move SRS4213343_1.fastq renamed/B27_DePCR_MT_55C_B_1_R1.fastq
B4-55-1	SRS4213343	214663454	SRS4213343	B4	B27	_	DePCR	_	MT	_	55C	_	B	_	1	_	R2	.fastq	_2		B27_DePCR_MT_55C_B_1_R2.fastq	move SRS4213343_2.fastq renamed/B27_DePCR_MT_55C_B_1_R2.fastq
B4-55-2	SRS4213341	214660468	SRS4213341	B4	B27	_	DePCR	_	MT	_	55C	_	B	_	2	_	R1	.fastq	_1		B27_DePCR_MT_55C_B_2_R1.fastq	move SRS4213341_1.fastq renamed/B27_DePCR_MT_55C_B_2_R1.fastq
B4-55-2	SRS4213341	214660468	SRS4213341	B4	B27	_	DePCR	_	MT	_	55C	_	B	_	2	_	R2	.fastq	_2		B27_DePCR_MT_55C_B_2_R2.fastq	move SRS4213341_2.fastq renamed/B27_DePCR_MT_55C_B_2_R2.fastq
B4-55-3	SRS4213342	214647466	SRS4213342	B4	B27	_	DePCR	_	MT	_	55C	_	B	_	3	_	R1	.fastq	_1		B27_DePCR_MT_55C_B_3_R1.fastq	move SRS4213342_1.fastq renamed/B27_DePCR_MT_55C_B_3_R1.fastq
B4-55-3	SRS4213342	214647466	SRS4213342	B4	B27	_	DePCR	_	MT	_	55C	_	B	_	3	_	R2	.fastq	_2		B27_DePCR_MT_55C_B_3_R2.fastq	move SRS4213342_2.fastq renamed/B27_DePCR_MT_55C_B_3_R2.fastq
B4-55-4	SRS4213340	214657469	SRS4213340	B4	B27	_	DePCR	_	MT	_	55C	_	B	_	4	_	R1	.fastq	_1		B27_DePCR_MT_55C_B_4_R1.fastq	move SRS4213340_1.fastq renamed/B27_DePCR_MT_55C_B_4_R1.fastq
B4-55-4	SRS4213340	214657469	SRS4213340	B4	B27	_	DePCR	_	MT	_	55C	_	B	_	4	_	R2	.fastq	_2		B27_DePCR_MT_55C_B_4_R2.fastq	move SRS4213340_2.fastq renamed/B27_DePCR_MT_55C_B_4_R2.fastq
B4-55-5	SRS4213504	214653467	SRS4213504	B4	B27	_	DePCR	_	MT	_	55C	_	B	_	5	_	R1	.fastq	_1		B27_DePCR_MT_55C_B_5_R1.fastq	move SRS4213504_1.fastq renamed/B27_DePCR_MT_55C_B_5_R1.fastq
B4-55-5	SRS4213504	214653467	SRS4213504	B4	B27	_	DePCR	_	MT	_	55C	_	B	_	5	_	R2	.fastq	_2		B27_DePCR_MT_55C_B_5_R2.fastq	move SRS4213504_2.fastq renamed/B27_DePCR_MT_55C_B_5_R2.fastq
B4-55-6	SRS4213505	214661477	SRS4213505	B4	B27	_	DePCR	_	MT	_	55C	_	B	_	6	_	R1	.fastq	_1		B27_DePCR_MT_55C_B_6_R1.fastq	move SRS4213505_1.fastq renamed/B27_DePCR_MT_55C_B_6_R1.fastq
B4-55-6	SRS4213505	214661477	SRS4213505	B4	B27	_	DePCR	_	MT	_	55C	_	B	_	6	_	R2	.fastq	_2		B27_DePCR_MT_55C_B_6_R2.fastq	move SRS4213505_2.fastq renamed/B27_DePCR_MT_55C_B_6_R2.fastq
B4-55-7	SRS4213502	214644461	SRS4213502	B4	B27	_	DePCR	_	MT	_	55C	_	B	_	7	_	R1	.fastq	_1		B27_DePCR_MT_55C_B_7_R1.fastq	move SRS4213502_1.fastq renamed/B27_DePCR_MT_55C_B_7_R1.fastq
B4-55-7	SRS4213502	214644461	SRS4213502	B4	B27	_	DePCR	_	MT	_	55C	_	B	_	7	_	R2	.fastq	_2		B27_DePCR_MT_55C_B_7_R2.fastq	move SRS4213502_2.fastq renamed/B27_DePCR_MT_55C_B_7_R2.fastq
B4-55-8	SRS4213503	214661478	SRS4213503	B4	B27	_	DePCR	_	MT	_	55C	_	B	_	8	_	R1	.fastq	_1		B27_DePCR_MT_55C_B_8_R1.fastq	move SRS4213503_1.fastq renamed/B27_DePCR_MT_55C_B_8_R1.fastq
B4-55-8	SRS4213503	214661478	SRS4213503	B4	B27	_	DePCR	_	MT	_	55C	_	B	_	8	_	R2	.fastq	_2		B27_DePCR_MT_55C_B_8_R2.fastq	move SRS4213503_2.fastq renamed/B27_DePCR_MT_55C_B_8_R2.fastq
B4S-45-1	SRS4213512	217242157	SRS4213512	B4	B27	_	PCR	_	MT	_	45C	_	B	_	1	_	R1	.fastq	_1		B27_PCR_MT_45C_B_1_R1.fastq	move SRS4213512_1.fastq renamed/B27_PCR_MT_45C_B_1_R1.fastq
B4S-45-1	SRS4213512	217242157	SRS4213512	B4	B27	_	PCR	_	MT	_	45C	_	B	_	1	_	R2	.fastq	_2		B27_PCR_MT_45C_B_1_R2.fastq	move SRS4213512_2.fastq renamed/B27_PCR_MT_45C_B_1_R2.fastq
B4S-45-2	SRS4213513	217239224	SRS4213513	B4	B27	_	PCR	_	MT	_	45C	_	B	_	2	_	R1	.fastq	_1		B27_PCR_MT_45C_B_2_R1.fastq	move SRS4213513_1.fastq renamed/B27_PCR_MT_45C_B_2_R1.fastq
B4S-45-2	SRS4213513	217239224	SRS4213513	B4	B27	_	PCR	_	MT	_	45C	_	B	_	2	_	R2	.fastq	_2		B27_PCR_MT_45C_B_2_R2.fastq	move SRS4213513_2.fastq renamed/B27_PCR_MT_45C_B_2_R2.fastq
B4S-45-3	SRS4213514	217245150	SRS4213514	B4	B27	_	PCR	_	MT	_	45C	_	B	_	3	_	R1	.fastq	_1		B27_PCR_MT_45C_B_3_R1.fastq	move SRS4213514_1.fastq renamed/B27_PCR_MT_45C_B_3_R1.fastq
B4S-45-3	SRS4213514	217245150	SRS4213514	B4	B27	_	PCR	_	MT	_	45C	_	B	_	3	_	R2	.fastq	_2		B27_PCR_MT_45C_B_3_R2.fastq	move SRS4213514_2.fastq renamed/B27_PCR_MT_45C_B_3_R2.fastq
B4S-45-4	SRS4213516	217237244	SRS4213516	B4	B27	_	PCR	_	MT	_	45C	_	B	_	4	_	R1	.fastq	_1		B27_PCR_MT_45C_B_4_R1.fastq	move SRS4213516_1.fastq renamed/B27_PCR_MT_45C_B_4_R1.fastq
B4S-45-4	SRS4213516	217237244	SRS4213516	B4	B27	_	PCR	_	MT	_	45C	_	B	_	4	_	R2	.fastq	_2		B27_PCR_MT_45C_B_4_R2.fastq	move SRS4213516_2.fastq renamed/B27_PCR_MT_45C_B_4_R2.fastq
B4S-45-5	SRS4213510	217232256	SRS4213510	B4	B27	_	PCR	_	MT	_	45C	_	B	_	5	_	R1	.fastq	_1		B27_PCR_MT_45C_B_5_R1.fastq	move SRS4213510_1.fastq renamed/B27_PCR_MT_45C_B_5_R1.fastq
B4S-45-5	SRS4213510	217232256	SRS4213510	B4	B27	_	PCR	_	MT	_	45C	_	B	_	5	_	R2	.fastq	_2		B27_PCR_MT_45C_B_5_R2.fastq	move SRS4213510_2.fastq renamed/B27_PCR_MT_45C_B_5_R2.fastq
B4S-45-6	SRS4213511	217249051	SRS4213511	B4	B27	_	PCR	_	MT	_	45C	_	B	_	6	_	R1	.fastq	_1		B27_PCR_MT_45C_B_6_R1.fastq	move SRS4213511_1.fastq renamed/B27_PCR_MT_45C_B_6_R1.fastq
B4S-45-6	SRS4213511	217249051	SRS4213511	B4	B27	_	PCR	_	MT	_	45C	_	B	_	6	_	R2	.fastq	_2		B27_PCR_MT_45C_B_6_R2.fastq	move SRS4213511_2.fastq renamed/B27_PCR_MT_45C_B_6_R2.fastq
B4S-45-7	SRS4213650	217238194	SRS4213650	B4	B27	_	PCR	_	MT	_	45C	_	B	_	7	_	R1	.fastq	_1		B27_PCR_MT_45C_B_7_R1.fastq	move SRS4213650_1.fastq renamed/B27_PCR_MT_45C_B_7_R1.fastq
B4S-45-7	SRS4213650	217238194	SRS4213650	B4	B27	_	PCR	_	MT	_	45C	_	B	_	7	_	R2	.fastq	_2		B27_PCR_MT_45C_B_7_R2.fastq	move SRS4213650_2.fastq renamed/B27_PCR_MT_45C_B_7_R2.fastq
B4S-45-8	SRS4213649	217232257	SRS4213649	B4	B27	_	PCR	_	MT	_	45C	_	B	_	8	_	R1	.fastq	_1		B27_PCR_MT_45C_B_8_R1.fastq	move SRS4213649_1.fastq renamed/B27_PCR_MT_45C_B_8_R1.fastq
B4S-45-8	SRS4213649	217232257	SRS4213649	B4	B27	_	PCR	_	MT	_	45C	_	B	_	8	_	R2	.fastq	_2		B27_PCR_MT_45C_B_8_R2.fastq	move SRS4213649_2.fastq renamed/B27_PCR_MT_45C_B_8_R2.fastq
B4S-55-1	SRS4213648	217237273	SRS4213648	B4	B27	_	PCR	_	MT	_	55C	_	B	_	1	_	R1	.fastq	_1		B27_PCR_MT_55C_B_1_R1.fastq	move SRS4213648_1.fastq renamed/B27_PCR_MT_55C_B_1_R1.fastq
B4S-55-1	SRS4213648	217237273	SRS4213648	B4	B27	_	PCR	_	MT	_	55C	_	B	_	1	_	R2	.fastq	_2		B27_PCR_MT_55C_B_1_R2.fastq	move SRS4213648_2.fastq renamed/B27_PCR_MT_55C_B_1_R2.fastq
B4S-55-2	SRS4213647	217247088	SRS4213647	B4	B27	_	PCR	_	MT	_	55C	_	B	_	2	_	R1	.fastq	_1		B27_PCR_MT_55C_B_2_R1.fastq	move SRS4213647_1.fastq renamed/B27_PCR_MT_55C_B_2_R1.fastq
B4S-55-2	SRS4213647	217247088	SRS4213647	B4	B27	_	PCR	_	MT	_	55C	_	B	_	2	_	R2	.fastq	_2		B27_PCR_MT_55C_B_2_R2.fastq	move SRS4213647_2.fastq renamed/B27_PCR_MT_55C_B_2_R2.fastq
B4S-55-3	SRS4213655	217232281	SRS4213655	B4	B27	_	PCR	_	MT	_	55C	_	B	_	3	_	R1	.fastq	_1		B27_PCR_MT_55C_B_3_R1.fastq	move SRS4213655_1.fastq renamed/B27_PCR_MT_55C_B_3_R1.fastq
B4S-55-3	SRS4213655	217232281	SRS4213655	B4	B27	_	PCR	_	MT	_	55C	_	B	_	3	_	R2	.fastq	_2		B27_PCR_MT_55C_B_3_R2.fastq	move SRS4213655_2.fastq renamed/B27_PCR_MT_55C_B_3_R2.fastq
B4S-55-4	SRS4213653	217243184	SRS4213653	B4	B27	_	PCR	_	MT	_	55C	_	B	_	4	_	R1	.fastq	_1		B27_PCR_MT_55C_B_4_R1.fastq	move SRS4213653_1.fastq renamed/B27_PCR_MT_55C_B_4_R1.fastq
B4S-55-4	SRS4213653	217243184	SRS4213653	B4	B27	_	PCR	_	MT	_	55C	_	B	_	4	_	R2	.fastq	_2		B27_PCR_MT_55C_B_4_R2.fastq	move SRS4213653_2.fastq renamed/B27_PCR_MT_55C_B_4_R2.fastq
B4S-55-5	SRS4213652	217231305	SRS4213652	B4	B27	_	PCR	_	MT	_	55C	_	B	_	5	_	R1	.fastq	_1		B27_PCR_MT_55C_B_5_R1.fastq	move SRS4213652_1.fastq renamed/B27_PCR_MT_55C_B_5_R1.fastq
B4S-55-5	SRS4213652	217231305	SRS4213652	B4	B27	_	PCR	_	MT	_	55C	_	B	_	5	_	R2	.fastq	_2		B27_PCR_MT_55C_B_5_R2.fastq	move SRS4213652_2.fastq renamed/B27_PCR_MT_55C_B_5_R2.fastq
B4S-55-6	SRS4213651	217237274	SRS4213651	B4	B27	_	PCR	_	MT	_	55C	_	B	_	6	_	R1	.fastq	_1		B27_PCR_MT_55C_B_6_R1.fastq	move SRS4213651_1.fastq renamed/B27_PCR_MT_55C_B_6_R1.fastq
B4S-55-6	SRS4213651	217237274	SRS4213651	B4	B27	_	PCR	_	MT	_	55C	_	B	_	6	_	R2	.fastq	_2		B27_PCR_MT_55C_B_6_R2.fastq	move SRS4213651_2.fastq renamed/B27_PCR_MT_55C_B_6_R2.fastq
B4S-55-7	SRS4213645	217231306	SRS4213645	B4	B27	_	PCR	_	MT	_	55C	_	B	_	7	_	R1	.fastq	_1		B27_PCR_MT_55C_B_7_R1.fastq	move SRS4213645_1.fastq renamed/B27_PCR_MT_55C_B_7_R1.fastq
B4S-55-7	SRS4213645	217231306	SRS4213645	B4	B27	_	PCR	_	MT	_	55C	_	B	_	7	_	R2	.fastq	_2		B27_PCR_MT_55C_B_7_R2.fastq	move SRS4213645_2.fastq renamed/B27_PCR_MT_55C_B_7_R2.fastq
B4S-55-8	SRS4213644	217249076	SRS4213644	B4	B27	_	PCR	_	MT	_	55C	_	B	_	8	_	R1	.fastq	_1		B27_PCR_MT_55C_B_8_R1.fastq	move SRS4213644_1.fastq renamed/B27_PCR_MT_55C_B_8_R1.fastq
B4S-55-8	SRS4213644	217249076	SRS4213644	B4	B27	_	PCR	_	MT	_	55C	_	B	_	8	_	R2	.fastq	_2		B27_PCR_MT_55C_B_8_R2.fastq	move SRS4213644_2.fastq renamed/B27_PCR_MT_55C_B_8_R2.fastq
C1-45-1	SRS4213508	214657455	SRS4213508	C1	C01	_	DePCR	_	MT	_	45C	_	C	_	1	_	R1	.fastq	_1		C01_DePCR_MT_45C_C_1_R1.fastq	move SRS4213508_1.fastq renamed/C01_DePCR_MT_45C_C_1_R1.fastq
C1-45-1	SRS4213508	214657455	SRS4213508	C1	C01	_	DePCR	_	MT	_	45C	_	C	_	1	_	R2	.fastq	_2		C01_DePCR_MT_45C_C_1_R2.fastq	move SRS4213508_2.fastq renamed/C01_DePCR_MT_45C_C_1_R2.fastq
C1-45-2	SRS4213509	214639449	SRS4213509	C1	C01	_	DePCR	_	MT	_	45C	_	C	_	2	_	R1	.fastq	_1		C01_DePCR_MT_45C_C_2_R1.fastq	move SRS4213509_1.fastq renamed/C01_DePCR_MT_45C_C_2_R1.fastq
C1-45-2	SRS4213509	214639449	SRS4213509	C1	C01	_	DePCR	_	MT	_	45C	_	C	_	2	_	R2	.fastq	_2		C01_DePCR_MT_45C_C_2_R2.fastq	move SRS4213509_2.fastq renamed/C01_DePCR_MT_45C_C_2_R2.fastq
C1-45-3	SRS4213506	214645446	SRS4213506	C1	C01	_	DePCR	_	MT	_	45C	_	C	_	3	_	R1	.fastq	_1		C01_DePCR_MT_45C_C_3_R1.fastq	move SRS4213506_1.fastq renamed/C01_DePCR_MT_45C_C_3_R1.fastq
C1-45-3	SRS4213506	214645446	SRS4213506	C1	C01	_	DePCR	_	MT	_	45C	_	C	_	3	_	R2	.fastq	_2		C01_DePCR_MT_45C_C_3_R2.fastq	move SRS4213506_2.fastq renamed/C01_DePCR_MT_45C_C_3_R2.fastq
C1-45-4	SRS4213507	214652456	SRS4213507	C1	C01	_	DePCR	_	MT	_	45C	_	C	_	4	_	R1	.fastq	_1		C01_DePCR_MT_45C_C_4_R1.fastq	move SRS4213507_1.fastq renamed/C01_DePCR_MT_45C_C_4_R1.fastq
C1-45-4	SRS4213507	214652456	SRS4213507	C1	C01	_	DePCR	_	MT	_	45C	_	C	_	4	_	R2	.fastq	_2		C01_DePCR_MT_45C_C_4_R2.fastq	move SRS4213507_2.fastq renamed/C01_DePCR_MT_45C_C_4_R2.fastq
C1-45-5	SRS4213498	214657456	SRS4213498	C1	C01	_	DePCR	_	MT	_	45C	_	C	_	5	_	R1	.fastq	_1		C01_DePCR_MT_45C_C_5_R1.fastq	move SRS4213498_1.fastq renamed/C01_DePCR_MT_45C_C_5_R1.fastq
C1-45-5	SRS4213498	214657456	SRS4213498	C1	C01	_	DePCR	_	MT	_	45C	_	C	_	5	_	R2	.fastq	_2		C01_DePCR_MT_45C_C_5_R2.fastq	move SRS4213498_2.fastq renamed/C01_DePCR_MT_45C_C_5_R2.fastq
C1-45-6	SRS4213499	214660458	SRS4213499	C1	C01	_	DePCR	_	MT	_	45C	_	C	_	6	_	R1	.fastq	_1		C01_DePCR_MT_45C_C_6_R1.fastq	move SRS4213499_1.fastq renamed/C01_DePCR_MT_45C_C_6_R1.fastq
C1-45-6	SRS4213499	214660458	SRS4213499	C1	C01	_	DePCR	_	MT	_	45C	_	C	_	6	_	R2	.fastq	_2		C01_DePCR_MT_45C_C_6_R2.fastq	move SRS4213499_2.fastq renamed/C01_DePCR_MT_45C_C_6_R2.fastq
C1-45-7	SRS4213491	214640445	SRS4213491	C1	C01	_	DePCR	_	MT	_	45C	_	C	_	7	_	R1	.fastq	_1		C01_DePCR_MT_45C_C_7_R1.fastq	move SRS4213491_1.fastq renamed/C01_DePCR_MT_45C_C_7_R1.fastq
C1-45-7	SRS4213491	214640445	SRS4213491	C1	C01	_	DePCR	_	MT	_	45C	_	C	_	7	_	R2	.fastq	_2		C01_DePCR_MT_45C_C_7_R2.fastq	move SRS4213491_2.fastq renamed/C01_DePCR_MT_45C_C_7_R2.fastq
C1-45-8	SRS4213490	214660459	SRS4213490	C1	C01	_	DePCR	_	MT	_	45C	_	C	_	8	_	R1	.fastq	_1		C01_DePCR_MT_45C_C_8_R1.fastq	move SRS4213490_1.fastq renamed/C01_DePCR_MT_45C_C_8_R1.fastq
C1-45-8	SRS4213490	214660459	SRS4213490	C1	C01	_	DePCR	_	MT	_	45C	_	C	_	8	_	R2	.fastq	_2		C01_DePCR_MT_45C_C_8_R2.fastq	move SRS4213490_2.fastq renamed/C01_DePCR_MT_45C_C_8_R2.fastq
C1-55-1	SRS4213493	214662471	SRS4213493	C1	C01	_	DePCR	_	MT	_	55C	_	C	_	1	_	R1	.fastq	_1		C01_DePCR_MT_55C_C_1_R1.fastq	move SRS4213493_1.fastq renamed/C01_DePCR_MT_55C_C_1_R1.fastq
C1-55-1	SRS4213493	214662471	SRS4213493	C1	C01	_	DePCR	_	MT	_	55C	_	C	_	1	_	R2	.fastq	_2		C01_DePCR_MT_55C_C_1_R2.fastq	move SRS4213493_2.fastq renamed/C01_DePCR_MT_55C_C_1_R2.fastq
C1-55-2	SRS4213492	214661479	SRS4213492	C1	C01	_	DePCR	_	MT	_	55C	_	C	_	2	_	R1	.fastq	_1		C01_DePCR_MT_55C_C_2_R1.fastq	move SRS4213492_1.fastq renamed/C01_DePCR_MT_55C_C_2_R1.fastq
C1-55-2	SRS4213492	214661479	SRS4213492	C1	C01	_	DePCR	_	MT	_	55C	_	C	_	2	_	R2	.fastq	_2		C01_DePCR_MT_55C_C_2_R2.fastq	move SRS4213492_2.fastq renamed/C01_DePCR_MT_55C_C_2_R2.fastq
C1-55-3	SRS4213640	214654457	SRS4213640	C1	C01	_	DePCR	_	MT	_	55C	_	C	_	3	_	R1	.fastq	_1		C01_DePCR_MT_55C_C_3_R1.fastq	move SRS4213640_1.fastq renamed/C01_DePCR_MT_55C_C_3_R1.fastq
C1-55-3	SRS4213640	214654457	SRS4213640	C1	C01	_	DePCR	_	MT	_	55C	_	C	_	3	_	R2	.fastq	_2		C01_DePCR_MT_55C_C_3_R2.fastq	move SRS4213640_2.fastq renamed/C01_DePCR_MT_55C_C_3_R2.fastq
C1-55-4	SRS4213639	214659466	SRS4213639	C1	C01	_	DePCR	_	MT	_	55C	_	C	_	4	_	R1	.fastq	_1		C01_DePCR_MT_55C_C_4_R1.fastq	move SRS4213639_1.fastq renamed/C01_DePCR_MT_55C_C_4_R1.fastq
C1-55-4	SRS4213639	214659466	SRS4213639	C1	C01	_	DePCR	_	MT	_	55C	_	C	_	4	_	R2	.fastq	_2		C01_DePCR_MT_55C_C_4_R2.fastq	move SRS4213639_2.fastq renamed/C01_DePCR_MT_55C_C_4_R2.fastq
C1-55-5	SRS4213497	214652469	SRS4213497	C1	C01	_	DePCR	_	MT	_	55C	_	C	_	5	_	R1	.fastq	_1		C01_DePCR_MT_55C_C_5_R1.fastq	move SRS4213497_1.fastq renamed/C01_DePCR_MT_55C_C_5_R1.fastq
C1-55-5	SRS4213497	214652469	SRS4213497	C1	C01	_	DePCR	_	MT	_	55C	_	C	_	5	_	R2	.fastq	_2		C01_DePCR_MT_55C_C_5_R2.fastq	move SRS4213497_2.fastq renamed/C01_DePCR_MT_55C_C_5_R2.fastq
C1-55-6	SRS4213496	214662472	SRS4213496	C1	C01	_	DePCR	_	MT	_	55C	_	C	_	6	_	R1	.fastq	_1		C01_DePCR_MT_55C_C_6_R1.fastq	move SRS4213496_1.fastq renamed/C01_DePCR_MT_55C_C_6_R1.fastq
C1-55-6	SRS4213496	214662472	SRS4213496	C1	C01	_	DePCR	_	MT	_	55C	_	C	_	6	_	R2	.fastq	_2		C01_DePCR_MT_55C_C_6_R2.fastq	move SRS4213496_2.fastq renamed/C01_DePCR_MT_55C_C_6_R2.fastq
C1-55-7	SRS4213632	214662473	SRS4213632	C1	C01	_	DePCR	_	MT	_	55C	_	C	_	7	_	R1	.fastq	_1		C01_DePCR_MT_55C_C_7_R1.fastq	move SRS4213632_1.fastq renamed/C01_DePCR_MT_55C_C_7_R1.fastq
C1-55-7	SRS4213632	214662473	SRS4213632	C1	C01	_	DePCR	_	MT	_	55C	_	C	_	7	_	R2	.fastq	_2		C01_DePCR_MT_55C_C_7_R2.fastq	move SRS4213632_2.fastq renamed/C01_DePCR_MT_55C_C_7_R2.fastq
C1-55-8	SRS4213631	214665453	SRS4213631	C1	C01	_	DePCR	_	MT	_	55C	_	C	_	8	_	R1	.fastq	_1		C01_DePCR_MT_55C_C_8_R1.fastq	move SRS4213631_1.fastq renamed/C01_DePCR_MT_55C_C_8_R1.fastq
C1-55-8	SRS4213631	214665453	SRS4213631	C1	C01	_	DePCR	_	MT	_	55C	_	C	_	8	_	R2	.fastq	_2		C01_DePCR_MT_55C_C_8_R2.fastq	move SRS4213631_2.fastq renamed/C01_DePCR_MT_55C_C_8_R2.fastq
C1S-45-1	SRS4213637	217228312	SRS4213637	C1	C01	_	PCR	_	MT	_	45C	_	C	_	1	_	R1	.fastq	_1		C01_PCR_MT_45C_C_1_R1.fastq	move SRS4213637_1.fastq renamed/C01_PCR_MT_45C_C_1_R1.fastq
C1S-45-1	SRS4213637	217228312	SRS4213637	C1	C01	_	PCR	_	MT	_	45C	_	C	_	1	_	R2	.fastq	_2		C01_PCR_MT_45C_C_1_R2.fastq	move SRS4213637_2.fastq renamed/C01_PCR_MT_45C_C_1_R2.fastq
C1S-45-2	SRS4213638	217232259	SRS4213638	C1	C01	_	PCR	_	MT	_	45C	_	C	_	2	_	R1	.fastq	_1		C01_PCR_MT_45C_C_2_R1.fastq	move SRS4213638_1.fastq renamed/C01_PCR_MT_45C_C_2_R1.fastq
C1S-45-2	SRS4213638	217232259	SRS4213638	C1	C01	_	PCR	_	MT	_	45C	_	C	_	2	_	R2	.fastq	_2		C01_PCR_MT_45C_C_2_R2.fastq	move SRS4213638_2.fastq renamed/C01_PCR_MT_45C_C_2_R2.fastq
C1S-45-3	SRS4213635	217229289	SRS4213635	C1	C01	_	PCR	_	MT	_	45C	_	C	_	3	_	R1	.fastq	_1		C01_PCR_MT_45C_C_3_R1.fastq	move SRS4213635_1.fastq renamed/C01_PCR_MT_45C_C_3_R1.fastq
C1S-45-3	SRS4213635	217229289	SRS4213635	C1	C01	_	PCR	_	MT	_	45C	_	C	_	3	_	R2	.fastq	_2		C01_PCR_MT_45C_C_3_R2.fastq	move SRS4213635_2.fastq renamed/C01_PCR_MT_45C_C_3_R2.fastq
C1S-45-4	SRS4213636	217247063	SRS4213636	C1	C01	_	PCR	_	MT	_	45C	_	C	_	4	_	R1	.fastq	_1		C01_PCR_MT_45C_C_4_R1.fastq	move SRS4213636_1.fastq renamed/C01_PCR_MT_45C_C_4_R1.fastq
C1S-45-4	SRS4213636	217247063	SRS4213636	C1	C01	_	PCR	_	MT	_	45C	_	C	_	4	_	R2	.fastq	_2		C01_PCR_MT_45C_C_4_R2.fastq	move SRS4213636_2.fastq renamed/C01_PCR_MT_45C_C_4_R2.fastq
C1S-45-5	SRS4213642	217243166	SRS4213642	C1	C01	_	PCR	_	MT	_	45C	_	C	_	5	_	R1	.fastq	_1		C01_PCR_MT_45C_C_5_R1.fastq	move SRS4213642_1.fastq renamed/C01_PCR_MT_45C_C_5_R1.fastq
C1S-45-5	SRS4213642	217243166	SRS4213642	C1	C01	_	PCR	_	MT	_	45C	_	C	_	5	_	R2	.fastq	_2		C01_PCR_MT_45C_C_5_R2.fastq	move SRS4213642_2.fastq renamed/C01_PCR_MT_45C_C_5_R2.fastq
C1S-45-6	SRS4213641	217237248	SRS4213641	C1	C01	_	PCR	_	MT	_	45C	_	C	_	6	_	R1	.fastq	_1		C01_PCR_MT_45C_C_6_R1.fastq	move SRS4213641_1.fastq renamed/C01_PCR_MT_45C_C_6_R1.fastq
C1S-45-6	SRS4213641	217237248	SRS4213641	C1	C01	_	PCR	_	MT	_	45C	_	C	_	6	_	R2	.fastq	_2		C01_PCR_MT_45C_C_6_R2.fastq	move SRS4213641_2.fastq renamed/C01_PCR_MT_45C_C_6_R2.fastq
C1S-45-7	SRS4213494	217243168	SRS4213494	C1	C01	_	PCR	_	MT	_	45C	_	C	_	7	_	R1	.fastq	_1		C01_PCR_MT_45C_C_7_R1.fastq	move SRS4213494_1.fastq renamed/C01_PCR_MT_45C_C_7_R1.fastq
C1S-45-7	SRS4213494	217243168	SRS4213494	C1	C01	_	PCR	_	MT	_	45C	_	C	_	7	_	R2	.fastq	_2		C01_PCR_MT_45C_C_7_R2.fastq	move SRS4213494_2.fastq renamed/C01_PCR_MT_45C_C_7_R2.fastq
C1S-45-8	SRS4213495	217247065	SRS4213495	C1	C01	_	PCR	_	MT	_	45C	_	C	_	8	_	R1	.fastq	_1		C01_PCR_MT_45C_C_8_R1.fastq	move SRS4213495_1.fastq renamed/C01_PCR_MT_45C_C_8_R1.fastq
C1S-45-8	SRS4213495	217247065	SRS4213495	C1	C01	_	PCR	_	MT	_	45C	_	C	_	8	_	R2	.fastq	_2		C01_PCR_MT_45C_C_8_R2.fastq	move SRS4213495_2.fastq renamed/C01_PCR_MT_45C_C_8_R2.fastq
C1S-55-1	SRS4213634	217232283	SRS4213634	C1	C01	_	PCR	_	MT	_	55C	_	C	_	1	_	R1	.fastq	_1		C01_PCR_MT_55C_C_1_R1.fastq	move SRS4213634_1.fastq renamed/C01_PCR_MT_55C_C_1_R1.fastq
C1S-55-1	SRS4213634	217232283	SRS4213634	C1	C01	_	PCR	_	MT	_	55C	_	C	_	1	_	R2	.fastq	_2		C01_PCR_MT_55C_C_1_R2.fastq	move SRS4213634_2.fastq renamed/C01_PCR_MT_55C_C_1_R2.fastq
C1S-55-2	SRS4213633	217251051	SRS4213633	C1	C01	_	PCR	_	MT	_	55C	_	C	_	2	_	R1	.fastq	_1		C01_PCR_MT_55C_C_2_R1.fastq	move SRS4213633_1.fastq renamed/C01_PCR_MT_55C_C_2_R1.fastq
C1S-55-2	SRS4213633	217251051	SRS4213633	C1	C01	_	PCR	_	MT	_	55C	_	C	_	2	_	R2	.fastq	_2		C01_PCR_MT_55C_C_2_R2.fastq	move SRS4213633_2.fastq renamed/C01_PCR_MT_55C_C_2_R2.fastq
C1S-55-3	SRS4213656	217240213	SRS4213656	C1	C01	_	PCR	_	MT	_	55C	_	C	_	3	_	R1	.fastq	_1		C01_PCR_MT_55C_C_3_R1.fastq	move SRS4213656_1.fastq renamed/C01_PCR_MT_55C_C_3_R1.fastq
C1S-55-3	SRS4213656	217240213	SRS4213656	C1	C01	_	PCR	_	MT	_	55C	_	C	_	3	_	R2	.fastq	_2		C01_PCR_MT_55C_C_3_R2.fastq	move SRS4213656_2.fastq renamed/C01_PCR_MT_55C_C_3_R2.fastq
C1S-55-4	SRS4213657	217244179	SRS4213657	C1	C01	_	PCR	_	MT	_	55C	_	C	_	4	_	R1	.fastq	_1		C01_PCR_MT_55C_C_4_R1.fastq	move SRS4213657_1.fastq renamed/C01_PCR_MT_55C_C_4_R1.fastq
C1S-55-4	SRS4213657	217244179	SRS4213657	C1	C01	_	PCR	_	MT	_	55C	_	C	_	4	_	R2	.fastq	_2		C01_PCR_MT_55C_C_4_R2.fastq	move SRS4213657_2.fastq renamed/C01_PCR_MT_55C_C_4_R2.fastq
C1S-55-5	SRS4213658	217239248	SRS4213658	C1	C01	_	PCR	_	MT	_	55C	_	C	_	5	_	R1	.fastq	_1		C01_PCR_MT_55C_C_5_R1.fastq	move SRS4213658_1.fastq renamed/C01_PCR_MT_55C_C_5_R1.fastq
C1S-55-5	SRS4213658	217239248	SRS4213658	C1	C01	_	PCR	_	MT	_	55C	_	C	_	5	_	R2	.fastq	_2		C01_PCR_MT_55C_C_5_R2.fastq	move SRS4213658_2.fastq renamed/C01_PCR_MT_55C_C_5_R2.fastq
C1S-55-6	SRS4213659	217238219	SRS4213659	C1	C01	_	PCR	_	MT	_	55C	_	C	_	6	_	R1	.fastq	_1		C01_PCR_MT_55C_C_6_R1.fastq	move SRS4213659_1.fastq renamed/C01_PCR_MT_55C_C_6_R1.fastq
C1S-55-6	SRS4213659	217238219	SRS4213659	C1	C01	_	PCR	_	MT	_	55C	_	C	_	6	_	R2	.fastq	_2		C01_PCR_MT_55C_C_6_R2.fastq	move SRS4213659_2.fastq renamed/C01_PCR_MT_55C_C_6_R2.fastq
C1S-55-7	SRS4213643	217250048	SRS4213643	C1	C01	_	PCR	_	MT	_	55C	_	C	_	7	_	R1	.fastq	_1		C01_PCR_MT_55C_C_7_R1.fastq	move SRS4213643_1.fastq renamed/C01_PCR_MT_55C_C_7_R1.fastq
C1S-55-7	SRS4213643	217250048	SRS4213643	C1	C01	_	PCR	_	MT	_	55C	_	C	_	7	_	R2	.fastq	_2		C01_PCR_MT_55C_C_7_R2.fastq	move SRS4213643_2.fastq renamed/C01_PCR_MT_55C_C_7_R2.fastq
C1S-55-8	SRS4213646	217245179	SRS4213646	C1	C01	_	PCR	_	MT	_	55C	_	C	_	8	_	R1	.fastq	_1		C01_PCR_MT_55C_C_8_R1.fastq	move SRS4213646_1.fastq renamed/C01_PCR_MT_55C_C_8_R1.fastq
C1S-55-8	SRS4213646	217245179	SRS4213646	C1	C01	_	PCR	_	MT	_	55C	_	C	_	8	_	R2	.fastq	_2		C01_PCR_MT_55C_C_8_R2.fastq	move SRS4213646_2.fastq renamed/C01_PCR_MT_55C_C_8_R2.fastq
C3-45-1	SRS4213393	214640447	SRS4213393	C3	C09	_	DePCR	_	MT	_	45C	_	C	_	1	_	R1	.fastq	_1		C09_DePCR_MT_45C_C_1_R1.fastq	move SRS4213393_1.fastq renamed/C09_DePCR_MT_45C_C_1_R1.fastq
C3-45-1	SRS4213393	214640447	SRS4213393	C3	C09	_	DePCR	_	MT	_	45C	_	C	_	1	_	R2	.fastq	_2		C09_DePCR_MT_45C_C_1_R2.fastq	move SRS4213393_2.fastq renamed/C09_DePCR_MT_45C_C_1_R2.fastq
C3-45-2	SRS4213392	214662461	SRS4213392	C3	C09	_	DePCR	_	MT	_	45C	_	C	_	2	_	R1	.fastq	_1		C09_DePCR_MT_45C_C_2_R1.fastq	move SRS4213392_1.fastq renamed/C09_DePCR_MT_45C_C_2_R1.fastq
C3-45-2	SRS4213392	214662461	SRS4213392	C3	C09	_	DePCR	_	MT	_	45C	_	C	_	2	_	R2	.fastq	_2		C09_DePCR_MT_45C_C_2_R2.fastq	move SRS4213392_2.fastq renamed/C09_DePCR_MT_45C_C_2_R2.fastq
C3-45-3	SRS4213397	214640448	SRS4213397	C3	C09	_	DePCR	_	MT	_	45C	_	C	_	3	_	R1	.fastq	_1		C09_DePCR_MT_45C_C_3_R1.fastq	move SRS4213397_1.fastq renamed/C09_DePCR_MT_45C_C_3_R1.fastq
C3-45-3	SRS4213397	214640448	SRS4213397	C3	C09	_	DePCR	_	MT	_	45C	_	C	_	3	_	R2	.fastq	_2		C09_DePCR_MT_45C_C_3_R2.fastq	move SRS4213397_2.fastq renamed/C09_DePCR_MT_45C_C_3_R2.fastq
C3-45-4	SRS4213396	214644443	SRS4213396	C3	C09	_	DePCR	_	MT	_	45C	_	C	_	4	_	R1	.fastq	_1		C09_DePCR_MT_45C_C_4_R1.fastq	move SRS4213396_1.fastq renamed/C09_DePCR_MT_45C_C_4_R1.fastq
C3-45-4	SRS4213396	214644443	SRS4213396	C3	C09	_	DePCR	_	MT	_	45C	_	C	_	4	_	R2	.fastq	_2		C09_DePCR_MT_45C_C_4_R2.fastq	move SRS4213396_2.fastq renamed/C09_DePCR_MT_45C_C_4_R2.fastq
C3-45-5	SRS4213292	214639451	SRS4213292	C3	C09	_	DePCR	_	MT	_	45C	_	C	_	5	_	R1	.fastq	_1		C09_DePCR_MT_45C_C_5_R1.fastq	move SRS4213292_1.fastq renamed/C09_DePCR_MT_45C_C_5_R1.fastq
C3-45-5	SRS4213292	214639451	SRS4213292	C3	C09	_	DePCR	_	MT	_	45C	_	C	_	5	_	R2	.fastq	_2		C09_DePCR_MT_45C_C_5_R2.fastq	move SRS4213292_2.fastq renamed/C09_DePCR_MT_45C_C_5_R2.fastq
C3-45-6	SRS4213293	214639452	SRS4213293	C3	C09	_	DePCR	_	MT	_	45C	_	C	_	6	_	R1	.fastq	_1		C09_DePCR_MT_45C_C_6_R1.fastq	move SRS4213293_1.fastq renamed/C09_DePCR_MT_45C_C_6_R1.fastq
C3-45-6	SRS4213293	214639452	SRS4213293	C3	C09	_	DePCR	_	MT	_	45C	_	C	_	6	_	R2	.fastq	_2		C09_DePCR_MT_45C_C_6_R2.fastq	move SRS4213293_2.fastq renamed/C09_DePCR_MT_45C_C_6_R2.fastq
C3-45-7	SRS4213290	214651452	SRS4213290	C3	C09	_	DePCR	_	MT	_	45C	_	C	_	7	_	R1	.fastq	_1		C09_DePCR_MT_45C_C_7_R1.fastq	move SRS4213290_1.fastq renamed/C09_DePCR_MT_45C_C_7_R1.fastq
C3-45-7	SRS4213290	214651452	SRS4213290	C3	C09	_	DePCR	_	MT	_	45C	_	C	_	7	_	R2	.fastq	_2		C09_DePCR_MT_45C_C_7_R2.fastq	move SRS4213290_2.fastq renamed/C09_DePCR_MT_45C_C_7_R2.fastq
C3-45-8	SRS4213291	214650458	SRS4213291	C3	C09	_	DePCR	_	MT	_	45C	_	C	_	8	_	R1	.fastq	_1		C09_DePCR_MT_45C_C_8_R1.fastq	move SRS4213291_1.fastq renamed/C09_DePCR_MT_45C_C_8_R1.fastq
C3-45-8	SRS4213291	214650458	SRS4213291	C3	C09	_	DePCR	_	MT	_	45C	_	C	_	8	_	R2	.fastq	_2		C09_DePCR_MT_45C_C_8_R2.fastq	move SRS4213291_2.fastq renamed/C09_DePCR_MT_45C_C_8_R2.fastq
C3-55-1	SRS4213288	214660471	SRS4213288	C3	C09	_	DePCR	_	MT	_	55C	_	C	_	1	_	R1	.fastq	_1		C09_DePCR_MT_55C_C_1_R1.fastq	move SRS4213288_1.fastq renamed/C09_DePCR_MT_55C_C_1_R1.fastq
C3-55-1	SRS4213288	214660471	SRS4213288	C3	C09	_	DePCR	_	MT	_	55C	_	C	_	1	_	R2	.fastq	_2		C09_DePCR_MT_55C_C_1_R2.fastq	move SRS4213288_2.fastq renamed/C09_DePCR_MT_55C_C_1_R2.fastq
C3-55-2	SRS4213289	214651463	SRS4213289	C3	C09	_	DePCR	_	MT	_	55C	_	C	_	2	_	R1	.fastq	_1		C09_DePCR_MT_55C_C_2_R1.fastq	move SRS4213289_1.fastq renamed/C09_DePCR_MT_55C_C_2_R1.fastq
C3-55-2	SRS4213289	214651463	SRS4213289	C3	C09	_	DePCR	_	MT	_	55C	_	C	_	2	_	R2	.fastq	_2		C09_DePCR_MT_55C_C_2_R2.fastq	move SRS4213289_2.fastq renamed/C09_DePCR_MT_55C_C_2_R2.fastq
C3-55-3	SRS4213286	214660472	SRS4213286	C3	C09	_	DePCR	_	MT	_	55C	_	C	_	3	_	R1	.fastq	_1		C09_DePCR_MT_55C_C_3_R1.fastq	move SRS4213286_1.fastq renamed/C09_DePCR_MT_55C_C_3_R1.fastq
C3-55-3	SRS4213286	214660472	SRS4213286	C3	C09	_	DePCR	_	MT	_	55C	_	C	_	3	_	R2	.fastq	_2		C09_DePCR_MT_55C_C_3_R2.fastq	move SRS4213286_2.fastq renamed/C09_DePCR_MT_55C_C_3_R2.fastq
C3-55-4	SRS4213287	214663456	SRS4213287	C3	C09	_	DePCR	_	MT	_	55C	_	C	_	4	_	R1	.fastq	_1		C09_DePCR_MT_55C_C_4_R1.fastq	move SRS4213287_1.fastq renamed/C09_DePCR_MT_55C_C_4_R1.fastq
C3-55-4	SRS4213287	214663456	SRS4213287	C3	C09	_	DePCR	_	MT	_	55C	_	C	_	4	_	R2	.fastq	_2		C09_DePCR_MT_55C_C_4_R2.fastq	move SRS4213287_2.fastq renamed/C09_DePCR_MT_55C_C_4_R2.fastq
C3-55-5	SRS4213284	214657473	SRS4213284	C3	C09	_	DePCR	_	MT	_	55C	_	C	_	5	_	R1	.fastq	_1		C09_DePCR_MT_55C_C_5_R1.fastq	move SRS4213284_1.fastq renamed/C09_DePCR_MT_55C_C_5_R1.fastq
C3-55-5	SRS4213284	214657473	SRS4213284	C3	C09	_	DePCR	_	MT	_	55C	_	C	_	5	_	R2	.fastq	_2		C09_DePCR_MT_55C_C_5_R2.fastq	move SRS4213284_2.fastq renamed/C09_DePCR_MT_55C_C_5_R2.fastq
C3-55-6	SRS4213285	214665456	SRS4213285	C3	C09	_	DePCR	_	MT	_	55C	_	C	_	6	_	R1	.fastq	_1		C09_DePCR_MT_55C_C_6_R1.fastq	move SRS4213285_1.fastq renamed/C09_DePCR_MT_55C_C_6_R1.fastq
C3-55-6	SRS4213285	214665456	SRS4213285	C3	C09	_	DePCR	_	MT	_	55C	_	C	_	6	_	R2	.fastq	_2		C09_DePCR_MT_55C_C_6_R2.fastq	move SRS4213285_2.fastq renamed/C09_DePCR_MT_55C_C_6_R2.fastq
C3-55-7	SRS4213415	214646479	SRS4213415	C3	C09	_	DePCR	_	MT	_	55C	_	C	_	7	_	R1	.fastq	_1		C09_DePCR_MT_55C_C_7_R1.fastq	move SRS4213415_1.fastq renamed/C09_DePCR_MT_55C_C_7_R1.fastq
C3-55-7	SRS4213415	214646479	SRS4213415	C3	C09	_	DePCR	_	MT	_	55C	_	C	_	7	_	R2	.fastq	_2		C09_DePCR_MT_55C_C_7_R2.fastq	move SRS4213415_2.fastq renamed/C09_DePCR_MT_55C_C_7_R2.fastq
C3-55-8	SRS4213414	214645465	SRS4213414	C3	C09	_	DePCR	_	MT	_	55C	_	C	_	8	_	R1	.fastq	_1		C09_DePCR_MT_55C_C_8_R1.fastq	move SRS4213414_1.fastq renamed/C09_DePCR_MT_55C_C_8_R1.fastq
C3-55-8	SRS4213414	214645465	SRS4213414	C3	C09	_	DePCR	_	MT	_	55C	_	C	_	8	_	R2	.fastq	_2		C09_DePCR_MT_55C_C_8_R2.fastq	move SRS4213414_2.fastq renamed/C09_DePCR_MT_55C_C_8_R2.fastq
C3S-45-1	SRS4213462	217244156	SRS4213462	C3	C09	_	PCR	_	MT	_	45C	_	C	_	1	_	R1	.fastq	_1		C09_PCR_MT_45C_C_1_R1.fastq	move SRS4213462_1.fastq renamed/C09_PCR_MT_45C_C_1_R1.fastq
C3S-45-1	SRS4213462	217244156	SRS4213462	C3	C09	_	PCR	_	MT	_	45C	_	C	_	1	_	R2	.fastq	_2		C09_PCR_MT_45C_C_1_R2.fastq	move SRS4213462_2.fastq renamed/C09_PCR_MT_45C_C_1_R2.fastq
C3S-45-2	SRS4213463	217242165	SRS4213463	C3	C09	_	PCR	_	MT	_	45C	_	C	_	2	_	R1	.fastq	_1		C09_PCR_MT_45C_C_2_R1.fastq	move SRS4213463_1.fastq renamed/C09_PCR_MT_45C_C_2_R1.fastq
C3S-45-2	SRS4213463	217242165	SRS4213463	C3	C09	_	PCR	_	MT	_	45C	_	C	_	2	_	R2	.fastq	_2		C09_PCR_MT_45C_C_2_R2.fastq	move SRS4213463_2.fastq renamed/C09_PCR_MT_45C_C_2_R2.fastq
C3S-45-3	SRS4213468	217239229	SRS4213468	C3	C09	_	PCR	_	MT	_	45C	_	C	_	3	_	R1	.fastq	_1		C09_PCR_MT_45C_C_3_R1.fastq	move SRS4213468_1.fastq renamed/C09_PCR_MT_45C_C_3_R1.fastq
C3S-45-3	SRS4213468	217239229	SRS4213468	C3	C09	_	PCR	_	MT	_	45C	_	C	_	3	_	R2	.fastq	_2		C09_PCR_MT_45C_C_3_R2.fastq	move SRS4213468_2.fastq renamed/C09_PCR_MT_45C_C_3_R2.fastq
C3S-45-4	SRS4213469	217250034	SRS4213469	C3	C09	_	PCR	_	MT	_	45C	_	C	_	4	_	R1	.fastq	_1		C09_PCR_MT_45C_C_4_R1.fastq	move SRS4213469_1.fastq renamed/C09_PCR_MT_45C_C_4_R1.fastq
C3S-45-4	SRS4213469	217250034	SRS4213469	C3	C09	_	PCR	_	MT	_	45C	_	C	_	4	_	R2	.fastq	_2		C09_PCR_MT_45C_C_4_R2.fastq	move SRS4213469_2.fastq renamed/C09_PCR_MT_45C_C_4_R2.fastq
C3S-45-5	SRS4213466	217242167	SRS4213466	C3	C09	_	PCR	_	MT	_	45C	_	C	_	5	_	R1	.fastq	_1		C09_PCR_MT_45C_C_5_R1.fastq	move SRS4213466_1.fastq renamed/C09_PCR_MT_45C_C_5_R1.fastq
C3S-45-5	SRS4213466	217242167	SRS4213466	C3	C09	_	PCR	_	MT	_	45C	_	C	_	5	_	R2	.fastq	_2		C09_PCR_MT_45C_C_5_R2.fastq	move SRS4213466_2.fastq renamed/C09_PCR_MT_45C_C_5_R2.fastq
C3S-45-6	SRS4213467	217236235	SRS4213467	C3	C09	_	PCR	_	MT	_	45C	_	C	_	6	_	R1	.fastq	_1		C09_PCR_MT_45C_C_6_R1.fastq	move SRS4213467_1.fastq renamed/C09_PCR_MT_45C_C_6_R1.fastq
C3S-45-6	SRS4213467	217236235	SRS4213467	C3	C09	_	PCR	_	MT	_	45C	_	C	_	6	_	R2	.fastq	_2		C09_PCR_MT_45C_C_6_R2.fastq	move SRS4213467_2.fastq renamed/C09_PCR_MT_45C_C_6_R2.fastq
C3S-45-7	SRS4213732	217240198	SRS4213732	C3	C09	_	PCR	_	MT	_	45C	_	C	_	7	_	R1	.fastq	_1		C09_PCR_MT_45C_C_7_R1.fastq	move SRS4213732_1.fastq renamed/C09_PCR_MT_45C_C_7_R1.fastq
C3S-45-7	SRS4213732	217240198	SRS4213732	C3	C09	_	PCR	_	MT	_	45C	_	C	_	7	_	R2	.fastq	_2		C09_PCR_MT_45C_C_7_R2.fastq	move SRS4213732_2.fastq renamed/C09_PCR_MT_45C_C_7_R2.fastq
C3S-45-8	SRS4213733	217250036	SRS4213733	C3	C09	_	PCR	_	MT	_	45C	_	C	_	8	_	R1	.fastq	_1		C09_PCR_MT_45C_C_8_R1.fastq	move SRS4213733_1.fastq renamed/C09_PCR_MT_45C_C_8_R1.fastq
C3S-45-8	SRS4213733	217250036	SRS4213733	C3	C09	_	PCR	_	MT	_	45C	_	C	_	8	_	R2	.fastq	_2		C09_PCR_MT_45C_C_8_R2.fastq	move SRS4213733_2.fastq renamed/C09_PCR_MT_45C_C_8_R2.fastq
C3S-55-1	SRS4213630	217237284	SRS4213630	C3	C09	_	PCR	_	MT	_	55C	_	C	_	1	_	R1	.fastq	_1		C09_PCR_MT_55C_C_1_R1.fastq	move SRS4213630_1.fastq renamed/C09_PCR_MT_55C_C_1_R1.fastq
C3S-55-1	SRS4213630	217237284	SRS4213630	C3	C09	_	PCR	_	MT	_	55C	_	C	_	1	_	R2	.fastq	_2		C09_PCR_MT_55C_C_1_R2.fastq	move SRS4213630_2.fastq renamed/C09_PCR_MT_55C_C_1_R2.fastq
C3S-55-2	SRS4213629	217235259	SRS4213629	C3	C09	_	PCR	_	MT	_	55C	_	C	_	2	_	R1	.fastq	_1		C09_PCR_MT_55C_C_2_R1.fastq	move SRS4213629_1.fastq renamed/C09_PCR_MT_55C_C_2_R1.fastq
C3S-55-2	SRS4213629	217235259	SRS4213629	C3	C09	_	PCR	_	MT	_	55C	_	C	_	2	_	R2	.fastq	_2		C09_PCR_MT_55C_C_2_R2.fastq	move SRS4213629_2.fastq renamed/C09_PCR_MT_55C_C_2_R2.fastq
C3S-55-3	SRS4213628	217239255	SRS4213628	C3	C09	_	PCR	_	MT	_	55C	_	C	_	3	_	R1	.fastq	_1		C09_PCR_MT_55C_C_3_R1.fastq	move SRS4213628_1.fastq renamed/C09_PCR_MT_55C_C_3_R1.fastq
C3S-55-3	SRS4213628	217239255	SRS4213628	C3	C09	_	PCR	_	MT	_	55C	_	C	_	3	_	R2	.fastq	_2		C09_PCR_MT_55C_C_3_R2.fastq	move SRS4213628_2.fastq renamed/C09_PCR_MT_55C_C_3_R2.fastq
C3S-55-4	SRS4213627	217245182	SRS4213627	C3	C09	_	PCR	_	MT	_	55C	_	C	_	4	_	R1	.fastq	_1		C09_PCR_MT_55C_C_4_R1.fastq	move SRS4213627_1.fastq renamed/C09_PCR_MT_55C_C_4_R1.fastq
C3S-55-4	SRS4213627	217245182	SRS4213627	C3	C09	_	PCR	_	MT	_	55C	_	C	_	4	_	R2	.fastq	_2		C09_PCR_MT_55C_C_4_R2.fastq	move SRS4213627_2.fastq renamed/C09_PCR_MT_55C_C_4_R2.fastq
C3S-55-5	SRS4213626	217236251	SRS4213626	C3	C09	_	PCR	_	MT	_	55C	_	C	_	5	_	R1	.fastq	_1		C09_PCR_MT_55C_C_5_R1.fastq	move SRS4213626_1.fastq renamed/C09_PCR_MT_55C_C_5_R1.fastq
C3S-55-5	SRS4213626	217236251	SRS4213626	C3	C09	_	PCR	_	MT	_	55C	_	C	_	5	_	R2	.fastq	_2		C09_PCR_MT_55C_C_5_R2.fastq	move SRS4213626_2.fastq renamed/C09_PCR_MT_55C_C_5_R2.fastq
C3S-55-6	SRS4213387	217237288	SRS4213387	C3	C09	_	PCR	_	MT	_	55C	_	C	_	6	_	R1	.fastq	_1		C09_PCR_MT_55C_C_6_R1.fastq	move SRS4213387_1.fastq renamed/C09_PCR_MT_55C_C_6_R1.fastq
C3S-55-6	SRS4213387	217237288	SRS4213387	C3	C09	_	PCR	_	MT	_	55C	_	C	_	6	_	R2	.fastq	_2		C09_PCR_MT_55C_C_6_R2.fastq	move SRS4213387_2.fastq renamed/C09_PCR_MT_55C_C_6_R2.fastq
C3S-55-7	SRS4213385	217231312	SRS4213385	C3	C09	_	PCR	_	MT	_	55C	_	C	_	7	_	R1	.fastq	_1		C09_PCR_MT_55C_C_7_R1.fastq	move SRS4213385_1.fastq renamed/C09_PCR_MT_55C_C_7_R1.fastq
C3S-55-7	SRS4213385	217231312	SRS4213385	C3	C09	_	PCR	_	MT	_	55C	_	C	_	7	_	R2	.fastq	_2		C09_PCR_MT_55C_C_7_R2.fastq	move SRS4213385_2.fastq renamed/C09_PCR_MT_55C_C_7_R2.fastq
C3S-55-8	SRS4213382	217231313	SRS4213382	C3	C09	_	PCR	_	MT	_	55C	_	C	_	8	_	R1	.fastq	_1		C09_PCR_MT_55C_C_8_R1.fastq	move SRS4213382_1.fastq renamed/C09_PCR_MT_55C_C_8_R1.fastq
C3S-55-8	SRS4213382	217231313	SRS4213382	C3	C09	_	PCR	_	MT	_	55C	_	C	_	8	_	R2	.fastq	_2		C09_PCR_MT_55C_C_8_R2.fastq	move SRS4213382_2.fastq renamed/C09_PCR_MT_55C_C_8_R2.fastq
C2-45-1	SRS4213268	214654449	SRS4213268	C2	C10	_	DePCR	_	MT	_	45C	_	C	_	1	_	R1	.fastq	_1		C10_DePCR_MT_45C_C_1_R1.fastq	move SRS4213268_1.fastq renamed/C10_DePCR_MT_45C_C_1_R1.fastq
C2-45-1	SRS4213268	214654449	SRS4213268	C2	C10	_	DePCR	_	MT	_	45C	_	C	_	1	_	R2	.fastq	_2		C10_DePCR_MT_45C_C_1_R2.fastq	move SRS4213268_2.fastq renamed/C10_DePCR_MT_45C_C_1_R2.fastq
C2-45-2	SRS4213269	214656463	SRS4213269	C2	C10	_	DePCR	_	MT	_	45C	_	C	_	2	_	R1	.fastq	_1		C10_DePCR_MT_45C_C_2_R1.fastq	move SRS4213269_1.fastq renamed/C10_DePCR_MT_45C_C_2_R1.fastq
C2-45-2	SRS4213269	214656463	SRS4213269	C2	C10	_	DePCR	_	MT	_	45C	_	C	_	2	_	R2	.fastq	_2		C10_DePCR_MT_45C_C_2_R2.fastq	move SRS4213269_2.fastq renamed/C10_DePCR_MT_45C_C_2_R2.fastq
C2-45-3	SRS4213270	214646456	SRS4213270	C2	C10	_	DePCR	_	MT	_	45C	_	C	_	3	_	R1	.fastq	_1		C10_DePCR_MT_45C_C_3_R1.fastq	move SRS4213270_1.fastq renamed/C10_DePCR_MT_45C_C_3_R1.fastq
C2-45-3	SRS4213270	214646456	SRS4213270	C2	C10	_	DePCR	_	MT	_	45C	_	C	_	3	_	R2	.fastq	_2		C10_DePCR_MT_45C_C_3_R2.fastq	move SRS4213270_2.fastq renamed/C10_DePCR_MT_45C_C_3_R2.fastq
C2-45-4	SRS4213271	214654451	SRS4213271	C2	C10	_	DePCR	_	MT	_	45C	_	C	_	4	_	R1	.fastq	_1		C10_DePCR_MT_45C_C_4_R1.fastq	move SRS4213271_1.fastq renamed/C10_DePCR_MT_45C_C_4_R1.fastq
C2-45-4	SRS4213271	214654451	SRS4213271	C2	C10	_	DePCR	_	MT	_	45C	_	C	_	4	_	R2	.fastq	_2		C10_DePCR_MT_45C_C_4_R2.fastq	move SRS4213271_2.fastq renamed/C10_DePCR_MT_45C_C_4_R2.fastq
C2-45-5	SRS4213264	214650455	SRS4213264	C2	C10	_	DePCR	_	MT	_	45C	_	C	_	5	_	R1	.fastq	_1		C10_DePCR_MT_45C_C_5_R1.fastq	move SRS4213264_1.fastq renamed/C10_DePCR_MT_45C_C_5_R1.fastq
C2-45-5	SRS4213264	214650455	SRS4213264	C2	C10	_	DePCR	_	MT	_	45C	_	C	_	5	_	R2	.fastq	_2		C10_DePCR_MT_45C_C_5_R2.fastq	move SRS4213264_2.fastq renamed/C10_DePCR_MT_45C_C_5_R2.fastq
C2-45-6	SRS4213265	214650456	SRS4213265	C2	C10	_	DePCR	_	MT	_	45C	_	C	_	6	_	R1	.fastq	_1		C10_DePCR_MT_45C_C_6_R1.fastq	move SRS4213265_1.fastq renamed/C10_DePCR_MT_45C_C_6_R1.fastq
C2-45-6	SRS4213265	214650456	SRS4213265	C2	C10	_	DePCR	_	MT	_	45C	_	C	_	6	_	R2	.fastq	_2		C10_DePCR_MT_45C_C_6_R2.fastq	move SRS4213265_2.fastq renamed/C10_DePCR_MT_45C_C_6_R2.fastq
C2-45-7	SRS4213266	214662460	SRS4213266	C2	C10	_	DePCR	_	MT	_	45C	_	C	_	7	_	R1	.fastq	_1		C10_DePCR_MT_45C_C_7_R1.fastq	move SRS4213266_1.fastq renamed/C10_DePCR_MT_45C_C_7_R1.fastq
C2-45-7	SRS4213266	214662460	SRS4213266	C2	C10	_	DePCR	_	MT	_	45C	_	C	_	7	_	R2	.fastq	_2		C10_DePCR_MT_45C_C_7_R2.fastq	move SRS4213266_2.fastq renamed/C10_DePCR_MT_45C_C_7_R2.fastq
C2-45-8	SRS4213267	214657457	SRS4213267	C2	C10	_	DePCR	_	MT	_	45C	_	C	_	8	_	R1	.fastq	_1		C10_DePCR_MT_45C_C_8_R1.fastq	move SRS4213267_1.fastq renamed/C10_DePCR_MT_45C_C_8_R1.fastq
C2-45-8	SRS4213267	214657457	SRS4213267	C2	C10	_	DePCR	_	MT	_	45C	_	C	_	8	_	R2	.fastq	_2		C10_DePCR_MT_45C_C_8_R2.fastq	move SRS4213267_2.fastq renamed/C10_DePCR_MT_45C_C_8_R2.fastq
C2-55-1	SRS4213272	214653468	SRS4213272	C2	C10	_	DePCR	_	MT	_	55C	_	C	_	1	_	R1	.fastq	_1		C10_DePCR_MT_55C_C_1_R1.fastq	move SRS4213272_1.fastq renamed/C10_DePCR_MT_55C_C_1_R1.fastq
C2-55-1	SRS4213272	214653468	SRS4213272	C2	C10	_	DePCR	_	MT	_	55C	_	C	_	1	_	R2	.fastq	_2		C10_DePCR_MT_55C_C_1_R2.fastq	move SRS4213272_2.fastq renamed/C10_DePCR_MT_55C_C_1_R2.fastq
C2-55-2	SRS4213273	214645462	SRS4213273	C2	C10	_	DePCR	_	MT	_	55C	_	C	_	2	_	R1	.fastq	_1		C10_DePCR_MT_55C_C_2_R1.fastq	move SRS4213273_1.fastq renamed/C10_DePCR_MT_55C_C_2_R1.fastq
C2-55-2	SRS4213273	214645462	SRS4213273	C2	C10	_	DePCR	_	MT	_	55C	_	C	_	2	_	R2	.fastq	_2		C10_DePCR_MT_55C_C_2_R2.fastq	move SRS4213273_2.fastq renamed/C10_DePCR_MT_55C_C_2_R2.fastq
C2-55-3	SRS4213391	214645463	SRS4213391	C2	C10	_	DePCR	_	MT	_	55C	_	C	_	3	_	R1	.fastq	_1		C10_DePCR_MT_55C_C_3_R1.fastq	move SRS4213391_1.fastq renamed/C10_DePCR_MT_55C_C_3_R1.fastq
C2-55-3	SRS4213391	214645463	SRS4213391	C2	C10	_	DePCR	_	MT	_	55C	_	C	_	3	_	R2	.fastq	_2		C10_DePCR_MT_55C_C_3_R2.fastq	move SRS4213391_2.fastq renamed/C10_DePCR_MT_55C_C_3_R2.fastq
C2-55-4	SRS4213390	214657472	SRS4213390	C2	C10	_	DePCR	_	MT	_	55C	_	C	_	4	_	R1	.fastq	_1		C10_DePCR_MT_55C_C_4_R1.fastq	move SRS4213390_1.fastq renamed/C10_DePCR_MT_55C_C_4_R1.fastq
C2-55-4	SRS4213390	214657472	SRS4213390	C2	C10	_	DePCR	_	MT	_	55C	_	C	_	4	_	R2	.fastq	_2		C10_DePCR_MT_55C_C_4_R2.fastq	move SRS4213390_2.fastq renamed/C10_DePCR_MT_55C_C_4_R2.fastq
C2-55-5	SRS4213389	214646477	SRS4213389	C2	C10	_	DePCR	_	MT	_	55C	_	C	_	5	_	R1	.fastq	_1		C10_DePCR_MT_55C_C_5_R1.fastq	move SRS4213389_1.fastq renamed/C10_DePCR_MT_55C_C_5_R1.fastq
C2-55-5	SRS4213389	214646477	SRS4213389	C2	C10	_	DePCR	_	MT	_	55C	_	C	_	5	_	R2	.fastq	_2		C10_DePCR_MT_55C_C_5_R2.fastq	move SRS4213389_2.fastq renamed/C10_DePCR_MT_55C_C_5_R2.fastq
C2-55-6	SRS4213388	214652470	SRS4213388	C2	C10	_	DePCR	_	MT	_	55C	_	C	_	6	_	R1	.fastq	_1		C10_DePCR_MT_55C_C_6_R1.fastq	move SRS4213388_1.fastq renamed/C10_DePCR_MT_55C_C_6_R1.fastq
C2-55-6	SRS4213388	214652470	SRS4213388	C2	C10	_	DePCR	_	MT	_	55C	_	C	_	6	_	R2	.fastq	_2		C10_DePCR_MT_55C_C_6_R2.fastq	move SRS4213388_2.fastq renamed/C10_DePCR_MT_55C_C_6_R2.fastq
C2-55-7	SRS4213395	214648463	SRS4213395	C2	C10	_	DePCR	_	MT	_	55C	_	C	_	7	_	R1	.fastq	_1		C10_DePCR_MT_55C_C_7_R1.fastq	move SRS4213395_1.fastq renamed/C10_DePCR_MT_55C_C_7_R1.fastq
C2-55-7	SRS4213395	214648463	SRS4213395	C2	C10	_	DePCR	_	MT	_	55C	_	C	_	7	_	R2	.fastq	_2		C10_DePCR_MT_55C_C_7_R2.fastq	move SRS4213395_2.fastq renamed/C10_DePCR_MT_55C_C_7_R2.fastq
C2-55-8	SRS4213394	214654458	SRS4213394	C2	C10	_	DePCR	_	MT	_	55C	_	C	_	8	_	R1	.fastq	_1		C10_DePCR_MT_55C_C_8_R1.fastq	move SRS4213394_1.fastq renamed/C10_DePCR_MT_55C_C_8_R1.fastq
C2-55-8	SRS4213394	214654458	SRS4213394	C2	C10	_	DePCR	_	MT	_	55C	_	C	_	8	_	R2	.fastq	_2		C10_DePCR_MT_55C_C_8_R2.fastq	move SRS4213394_2.fastq renamed/C10_DePCR_MT_55C_C_8_R2.fastq
C2S-45-1	SRS4213384	217249056	SRS4213384	C2	C10	_	PCR	_	MT	_	45C	_	C	_	1	_	R1	.fastq	_1		C10_PCR_MT_45C_C_1_R1.fastq	move SRS4213384_1.fastq renamed/C10_PCR_MT_45C_C_1_R1.fastq
C2S-45-1	SRS4213384	217249056	SRS4213384	C2	C10	_	PCR	_	MT	_	45C	_	C	_	1	_	R2	.fastq	_2		C10_PCR_MT_45C_C_1_R2.fastq	move SRS4213384_2.fastq renamed/C10_PCR_MT_45C_C_1_R2.fastq
C2S-45-2	SRS4213654	217240196	SRS4213654	C2	C10	_	PCR	_	MT	_	45C	_	C	_	2	_	R1	.fastq	_1		C10_PCR_MT_45C_C_2_R1.fastq	move SRS4213654_1.fastq renamed/C10_PCR_MT_45C_C_2_R1.fastq
C2S-45-2	SRS4213654	217240196	SRS4213654	C2	C10	_	PCR	_	MT	_	45C	_	C	_	2	_	R2	.fastq	_2		C10_PCR_MT_45C_C_2_R2.fastq	move SRS4213654_2.fastq renamed/C10_PCR_MT_45C_C_2_R2.fastq
C2S-45-3	SRS4213500	217239226	SRS4213500	C2	C10	_	PCR	_	MT	_	45C	_	C	_	3	_	R1	.fastq	_1		C10_PCR_MT_45C_C_3_R1.fastq	move SRS4213500_1.fastq renamed/C10_PCR_MT_45C_C_3_R1.fastq
C2S-45-3	SRS4213500	217239226	SRS4213500	C2	C10	_	PCR	_	MT	_	45C	_	C	_	3	_	R2	.fastq	_2		C10_PCR_MT_45C_C_3_R2.fastq	move SRS4213500_2.fastq renamed/C10_PCR_MT_45C_C_3_R2.fastq
C2S-45-4	SRS4213501	217241194	SRS4213501	C2	C10	_	PCR	_	MT	_	45C	_	C	_	4	_	R1	.fastq	_1		C10_PCR_MT_45C_C_4_R1.fastq	move SRS4213501_1.fastq renamed/C10_PCR_MT_45C_C_4_R1.fastq
C2S-45-4	SRS4213501	217241194	SRS4213501	C2	C10	_	PCR	_	MT	_	45C	_	C	_	4	_	R2	.fastq	_2		C10_PCR_MT_45C_C_4_R2.fastq	move SRS4213501_2.fastq renamed/C10_PCR_MT_45C_C_4_R2.fastq
C2S-45-5	SRS4213352	217238197	SRS4213352	C2	C10	_	PCR	_	MT	_	45C	_	C	_	5	_	R1	.fastq	_1		C10_PCR_MT_45C_C_5_R1.fastq	move SRS4213352_1.fastq renamed/C10_PCR_MT_45C_C_5_R1.fastq
C2S-45-5	SRS4213352	217238197	SRS4213352	C2	C10	_	PCR	_	MT	_	45C	_	C	_	5	_	R2	.fastq	_2		C10_PCR_MT_45C_C_5_R2.fastq	move SRS4213352_2.fastq renamed/C10_PCR_MT_45C_C_5_R2.fastq
C2S-45-6	SRS4213350	217232261	SRS4213350	C2	C10	_	PCR	_	MT	_	45C	_	C	_	6	_	R1	.fastq	_1		C10_PCR_MT_45C_C_6_R1.fastq	move SRS4213350_1.fastq renamed/C10_PCR_MT_45C_C_6_R1.fastq
C2S-45-6	SRS4213350	217232261	SRS4213350	C2	C10	_	PCR	_	MT	_	45C	_	C	_	6	_	R2	.fastq	_2		C10_PCR_MT_45C_C_6_R2.fastq	move SRS4213350_2.fastq renamed/C10_PCR_MT_45C_C_6_R2.fastq
C2S-45-7	SRS4213353	217242164	SRS4213353	C2	C10	_	PCR	_	MT	_	45C	_	C	_	7	_	R1	.fastq	_1		C10_PCR_MT_45C_C_7_R1.fastq	move SRS4213353_1.fastq renamed/C10_PCR_MT_45C_C_7_R1.fastq
C2S-45-7	SRS4213353	217242164	SRS4213353	C2	C10	_	PCR	_	MT	_	45C	_	C	_	7	_	R2	.fastq	_2		C10_PCR_MT_45C_C_7_R2.fastq	move SRS4213353_2.fastq renamed/C10_PCR_MT_45C_C_7_R2.fastq
C2S-45-8	SRS4213351	217238198	SRS4213351	C2	C10	_	PCR	_	MT	_	45C	_	C	_	8	_	R1	.fastq	_1		C10_PCR_MT_45C_C_8_R1.fastq	move SRS4213351_1.fastq renamed/C10_PCR_MT_45C_C_8_R1.fastq
C2S-45-8	SRS4213351	217238198	SRS4213351	C2	C10	_	PCR	_	MT	_	45C	_	C	_	8	_	R2	.fastq	_2		C10_PCR_MT_45C_C_8_R2.fastq	move SRS4213351_2.fastq renamed/C10_PCR_MT_45C_C_8_R2.fastq
C2S-55-1	SRS4213355	217235256	SRS4213355	C2	C10	_	PCR	_	MT	_	55C	_	C	_	1	_	R1	.fastq	_1		C10_PCR_MT_55C_C_1_R1.fastq	move SRS4213355_1.fastq renamed/C10_PCR_MT_55C_C_1_R1.fastq
C2S-55-1	SRS4213355	217235256	SRS4213355	C2	C10	_	PCR	_	MT	_	55C	_	C	_	1	_	R2	.fastq	_2		C10_PCR_MT_55C_C_1_R2.fastq	move SRS4213355_2.fastq renamed/C10_PCR_MT_55C_C_1_R2.fastq
C2S-55-2	SRS4213354	217235257	SRS4213354	C2	C10	_	PCR	_	MT	_	55C	_	C	_	2	_	R1	.fastq	_1		C10_PCR_MT_55C_C_2_R1.fastq	move SRS4213354_1.fastq renamed/C10_PCR_MT_55C_C_2_R1.fastq
C2S-55-2	SRS4213354	217235257	SRS4213354	C2	C10	_	PCR	_	MT	_	55C	_	C	_	2	_	R2	.fastq	_2		C10_PCR_MT_55C_C_2_R2.fastq	move SRS4213354_2.fastq renamed/C10_PCR_MT_55C_C_2_R2.fastq
C2S-55-3	SRS4213357	217243188	SRS4213357	C2	C10	_	PCR	_	MT	_	55C	_	C	_	3	_	R1	.fastq	_1		C10_PCR_MT_55C_C_3_R1.fastq	move SRS4213357_1.fastq renamed/C10_PCR_MT_55C_C_3_R1.fastq
C2S-55-3	SRS4213357	217243188	SRS4213357	C2	C10	_	PCR	_	MT	_	55C	_	C	_	3	_	R2	.fastq	_2		C10_PCR_MT_55C_C_3_R2.fastq	move SRS4213357_2.fastq renamed/C10_PCR_MT_55C_C_3_R2.fastq
C2S-55-4	SRS4213356	217239251	SRS4213356	C2	C10	_	PCR	_	MT	_	55C	_	C	_	4	_	R1	.fastq	_1		C10_PCR_MT_55C_C_4_R1.fastq	move SRS4213356_1.fastq renamed/C10_PCR_MT_55C_C_4_R1.fastq
C2S-55-4	SRS4213356	217239251	SRS4213356	C2	C10	_	PCR	_	MT	_	55C	_	C	_	4	_	R2	.fastq	_2		C10_PCR_MT_55C_C_4_R2.fastq	move SRS4213356_2.fastq renamed/C10_PCR_MT_55C_C_4_R2.fastq
C2S-55-5	SRS4213359	217243189	SRS4213359	C2	C10	_	PCR	_	MT	_	55C	_	C	_	5	_	R1	.fastq	_1		C10_PCR_MT_55C_C_5_R1.fastq	move SRS4213359_1.fastq renamed/C10_PCR_MT_55C_C_5_R1.fastq
C2S-55-5	SRS4213359	217243189	SRS4213359	C2	C10	_	PCR	_	MT	_	55C	_	C	_	5	_	R2	.fastq	_2		C10_PCR_MT_55C_C_5_R2.fastq	move SRS4213359_2.fastq renamed/C10_PCR_MT_55C_C_5_R2.fastq
C2S-55-6	SRS4213358	217244185	SRS4213358	C2	C10	_	PCR	_	MT	_	55C	_	C	_	6	_	R1	.fastq	_1		C10_PCR_MT_55C_C_6_R1.fastq	move SRS4213358_1.fastq renamed/C10_PCR_MT_55C_C_6_R1.fastq
C2S-55-6	SRS4213358	217244185	SRS4213358	C2	C10	_	PCR	_	MT	_	55C	_	C	_	6	_	R2	.fastq	_2		C10_PCR_MT_55C_C_6_R2.fastq	move SRS4213358_2.fastq renamed/C10_PCR_MT_55C_C_6_R2.fastq
C2S-55-7	SRS4213464	217239252	SRS4213464	C2	C10	_	PCR	_	MT	_	55C	_	C	_	7	_	R1	.fastq	_1		C10_PCR_MT_55C_C_7_R1.fastq	move SRS4213464_1.fastq renamed/C10_PCR_MT_55C_C_7_R1.fastq
C2S-55-7	SRS4213464	217239252	SRS4213464	C2	C10	_	PCR	_	MT	_	55C	_	C	_	7	_	R2	.fastq	_2		C10_PCR_MT_55C_C_7_R2.fastq	move SRS4213464_2.fastq renamed/C10_PCR_MT_55C_C_7_R2.fastq
C2S-55-8	SRS4213465	217232285	SRS4213465	C2	C10	_	PCR	_	MT	_	55C	_	C	_	8	_	R1	.fastq	_1		C10_PCR_MT_55C_C_8_R1.fastq	move SRS4213465_1.fastq renamed/C10_PCR_MT_55C_C_8_R1.fastq
C2S-55-8	SRS4213465	217232285	SRS4213465	C2	C10	_	PCR	_	MT	_	55C	_	C	_	8	_	R2	.fastq	_2		C10_PCR_MT_55C_C_8_R2.fastq	move SRS4213465_2.fastq renamed/C10_PCR_MT_55C_C_8_R2.fastq
D1-45-1	SRS4213417	214657458	SRS4213417	D1	D01	_	DePCR	_	MT	_	45C	_	D	_	1	_	R1	.fastq	_1		D01_DePCR_MT_45C_D_1_R1.fastq	move SRS4213417_1.fastq renamed/D01_DePCR_MT_45C_D_1_R1.fastq
D1-45-1	SRS4213417	214657458	SRS4213417	D1	D01	_	DePCR	_	MT	_	45C	_	D	_	1	_	R2	.fastq	_2		D01_DePCR_MT_45C_D_1_R2.fastq	move SRS4213417_2.fastq renamed/D01_DePCR_MT_45C_D_1_R2.fastq
D1-45-2	SRS4213416	214662463	SRS4213416	D1	D01	_	DePCR	_	MT	_	45C	_	D	_	2	_	R1	.fastq	_1		D01_DePCR_MT_45C_D_2_R1.fastq	move SRS4213416_1.fastq renamed/D01_DePCR_MT_45C_D_2_R1.fastq
D1-45-2	SRS4213416	214662463	SRS4213416	D1	D01	_	DePCR	_	MT	_	45C	_	D	_	2	_	R2	.fastq	_2		D01_DePCR_MT_45C_D_2_R2.fastq	move SRS4213416_2.fastq renamed/D01_DePCR_MT_45C_D_2_R2.fastq
D1-45-3	SRS4213411	214646459	SRS4213411	D1	D01	_	DePCR	_	MT	_	45C	_	D	_	3	_	R1	.fastq	_1		D01_DePCR_MT_45C_D_3_R1.fastq	move SRS4213411_1.fastq renamed/D01_DePCR_MT_45C_D_3_R1.fastq
D1-45-3	SRS4213411	214646459	SRS4213411	D1	D01	_	DePCR	_	MT	_	45C	_	D	_	3	_	R2	.fastq	_2		D01_DePCR_MT_45C_D_3_R2.fastq	move SRS4213411_2.fastq renamed/D01_DePCR_MT_45C_D_3_R2.fastq
D1-45-4	SRS4213410	214656464	SRS4213410	D1	D01	_	DePCR	_	MT	_	45C	_	D	_	4	_	R1	.fastq	_1		D01_DePCR_MT_45C_D_4_R1.fastq	move SRS4213410_1.fastq renamed/D01_DePCR_MT_45C_D_4_R1.fastq
D1-45-4	SRS4213410	214656464	SRS4213410	D1	D01	_	DePCR	_	MT	_	45C	_	D	_	4	_	R2	.fastq	_2		D01_DePCR_MT_45C_D_4_R2.fastq	move SRS4213410_2.fastq renamed/D01_DePCR_MT_45C_D_4_R2.fastq
D1-45-5	SRS4213413	214646461	SRS4213413	D1	D01	_	DePCR	_	MT	_	45C	_	D	_	5	_	R1	.fastq	_1		D01_DePCR_MT_45C_D_5_R1.fastq	move SRS4213413_1.fastq renamed/D01_DePCR_MT_45C_D_5_R1.fastq
D1-45-5	SRS4213413	214646461	SRS4213413	D1	D01	_	DePCR	_	MT	_	45C	_	D	_	5	_	R2	.fastq	_2		D01_DePCR_MT_45C_D_5_R2.fastq	move SRS4213413_2.fastq renamed/D01_DePCR_MT_45C_D_5_R2.fastq
D1-45-6	SRS4213412	214651453	SRS4213412	D1	D01	_	DePCR	_	MT	_	45C	_	D	_	6	_	R1	.fastq	_1		D01_DePCR_MT_45C_D_6_R1.fastq	move SRS4213412_1.fastq renamed/D01_DePCR_MT_45C_D_6_R1.fastq
D1-45-6	SRS4213412	214651453	SRS4213412	D1	D01	_	DePCR	_	MT	_	45C	_	D	_	6	_	R2	.fastq	_2		D01_DePCR_MT_45C_D_6_R2.fastq	move SRS4213412_2.fastq renamed/D01_DePCR_MT_45C_D_6_R2.fastq
D1-45-7	SRS4213409	214648449	SRS4213409	D1	D01	_	DePCR	_	MT	_	45C	_	D	_	7	_	R1	.fastq	_1		D01_DePCR_MT_45C_D_7_R1.fastq	move SRS4213409_1.fastq renamed/D01_DePCR_MT_45C_D_7_R1.fastq
D1-45-7	SRS4213409	214648449	SRS4213409	D1	D01	_	DePCR	_	MT	_	45C	_	D	_	7	_	R2	.fastq	_2		D01_DePCR_MT_45C_D_7_R2.fastq	move SRS4213409_2.fastq renamed/D01_DePCR_MT_45C_D_7_R2.fastq
D1-45-8	SRS4213408	214652457	SRS4213408	D1	D01	_	DePCR	_	MT	_	45C	_	D	_	8	_	R1	.fastq	_1		D01_DePCR_MT_45C_D_8_R1.fastq	move SRS4213408_1.fastq renamed/D01_DePCR_MT_45C_D_8_R1.fastq
D1-45-8	SRS4213408	214652457	SRS4213408	D1	D01	_	DePCR	_	MT	_	45C	_	D	_	8	_	R2	.fastq	_2		D01_DePCR_MT_45C_D_8_R2.fastq	move SRS4213408_2.fastq renamed/D01_DePCR_MT_45C_D_8_R2.fastq
D1-55-1	SRS4213460	214660473	SRS4213460	D1	D01	_	DePCR	_	MT	_	55C	_	D	_	1	_	R1	.fastq	_1		D01_DePCR_MT_55C_D_1_R1.fastq	move SRS4213460_1.fastq renamed/D01_DePCR_MT_55C_D_1_R1.fastq
D1-55-1	SRS4213460	214660473	SRS4213460	D1	D01	_	DePCR	_	MT	_	55C	_	D	_	1	_	R2	.fastq	_2		D01_DePCR_MT_55C_D_1_R2.fastq	move SRS4213460_2.fastq renamed/D01_DePCR_MT_55C_D_1_R2.fastq
D1-55-2	SRS4213458	214654459	SRS4213458	D1	D01	_	DePCR	_	MT	_	55C	_	D	_	2	_	R1	.fastq	_1		D01_DePCR_MT_55C_D_2_R1.fastq	move SRS4213458_1.fastq renamed/D01_DePCR_MT_55C_D_2_R1.fastq
D1-55-2	SRS4213458	214654459	SRS4213458	D1	D01	_	DePCR	_	MT	_	55C	_	D	_	2	_	R2	.fastq	_2		D01_DePCR_MT_55C_D_2_R2.fastq	move SRS4213458_2.fastq renamed/D01_DePCR_MT_55C_D_2_R2.fastq
D1-55-3	SRS4213461	214662475	SRS4213461	D1	D01	_	DePCR	_	MT	_	55C	_	D	_	3	_	R1	.fastq	_1		D01_DePCR_MT_55C_D_3_R1.fastq	move SRS4213461_1.fastq renamed/D01_DePCR_MT_55C_D_3_R1.fastq
D1-55-3	SRS4213461	214662475	SRS4213461	D1	D01	_	DePCR	_	MT	_	55C	_	D	_	3	_	R2	.fastq	_2		D01_DePCR_MT_55C_D_3_R2.fastq	move SRS4213461_2.fastq renamed/D01_DePCR_MT_55C_D_3_R2.fastq
D1-55-4	SRS4213459	214656470	SRS4213459	D1	D01	_	DePCR	_	MT	_	55C	_	D	_	4	_	R1	.fastq	_1		D01_DePCR_MT_55C_D_4_R1.fastq	move SRS4213459_1.fastq renamed/D01_DePCR_MT_55C_D_4_R1.fastq
D1-55-4	SRS4213459	214656470	SRS4213459	D1	D01	_	DePCR	_	MT	_	55C	_	D	_	4	_	R2	.fastq	_2		D01_DePCR_MT_55C_D_4_R2.fastq	move SRS4213459_2.fastq renamed/D01_DePCR_MT_55C_D_4_R2.fastq
D1-55-5	SRS4213455	214650470	SRS4213455	D1	D01	_	DePCR	_	MT	_	55C	_	D	_	5	_	R1	.fastq	_1		D01_DePCR_MT_55C_D_5_R1.fastq	move SRS4213455_1.fastq renamed/D01_DePCR_MT_55C_D_5_R1.fastq
D1-55-5	SRS4213455	214650470	SRS4213455	D1	D01	_	DePCR	_	MT	_	55C	_	D	_	5	_	R2	.fastq	_2		D01_DePCR_MT_55C_D_5_R2.fastq	move SRS4213455_2.fastq renamed/D01_DePCR_MT_55C_D_5_R2.fastq
D1-55-6	SRS4213454	214647469	SRS4213454	D1	D01	_	DePCR	_	MT	_	55C	_	D	_	6	_	R1	.fastq	_1		D01_DePCR_MT_55C_D_6_R1.fastq	move SRS4213454_1.fastq renamed/D01_DePCR_MT_55C_D_6_R1.fastq
D1-55-6	SRS4213454	214647469	SRS4213454	D1	D01	_	DePCR	_	MT	_	55C	_	D	_	6	_	R2	.fastq	_2		D01_DePCR_MT_55C_D_6_R2.fastq	move SRS4213454_2.fastq renamed/D01_DePCR_MT_55C_D_6_R2.fastq
D1-55-7	SRS4213457	214651464	SRS4213457	D1	D01	_	DePCR	_	MT	_	55C	_	D	_	7	_	R1	.fastq	_1		D01_DePCR_MT_55C_D_7_R1.fastq	move SRS4213457_1.fastq renamed/D01_DePCR_MT_55C_D_7_R1.fastq
D1-55-7	SRS4213457	214651464	SRS4213457	D1	D01	_	DePCR	_	MT	_	55C	_	D	_	7	_	R2	.fastq	_2		D01_DePCR_MT_55C_D_7_R2.fastq	move SRS4213457_2.fastq renamed/D01_DePCR_MT_55C_D_7_R2.fastq
D1-55-8	SRS4213456	214661480	SRS4213456	D1	D01	_	DePCR	_	MT	_	55C	_	D	_	8	_	R1	.fastq	_1		D01_DePCR_MT_55C_D_8_R1.fastq	move SRS4213456_1.fastq renamed/D01_DePCR_MT_55C_D_8_R1.fastq
D1-55-8	SRS4213456	214661480	SRS4213456	D1	D01	_	DePCR	_	MT	_	55C	_	D	_	8	_	R2	.fastq	_2		D01_DePCR_MT_55C_D_8_R2.fastq	move SRS4213456_2.fastq renamed/D01_DePCR_MT_55C_D_8_R2.fastq
D1S-45-1	SRS4213583	217235232	SRS4213583	D1	D01	_	PCR	_	MT	_	45C	_	D	_	1	_	R1	.fastq	_1		D01_PCR_MT_45C_D_1_R1.fastq	move SRS4213583_1.fastq renamed/D01_PCR_MT_45C_D_1_R1.fastq
D1S-45-1	SRS4213583	217235232	SRS4213583	D1	D01	_	PCR	_	MT	_	45C	_	D	_	1	_	R2	.fastq	_2		D01_PCR_MT_45C_D_1_R2.fastq	move SRS4213583_2.fastq renamed/D01_PCR_MT_45C_D_1_R2.fastq
D1S-45-2	SRS4213582	217247068	SRS4213582	D1	D01	_	PCR	_	MT	_	45C	_	D	_	2	_	R1	.fastq	_1		D01_PCR_MT_45C_D_2_R1.fastq	move SRS4213582_1.fastq renamed/D01_PCR_MT_45C_D_2_R1.fastq
D1S-45-2	SRS4213582	217247068	SRS4213582	D1	D01	_	PCR	_	MT	_	45C	_	D	_	2	_	R2	.fastq	_2		D01_PCR_MT_45C_D_2_R2.fastq	move SRS4213582_2.fastq renamed/D01_PCR_MT_45C_D_2_R2.fastq
D1S-45-3	SRS4213436	217239232	SRS4213436	D1	D01	_	PCR	_	MT	_	45C	_	D	_	3	_	R1	.fastq	_1		D01_PCR_MT_45C_D_3_R1.fastq	move SRS4213436_1.fastq renamed/D01_PCR_MT_45C_D_3_R1.fastq
D1S-45-3	SRS4213436	217239232	SRS4213436	D1	D01	_	PCR	_	MT	_	45C	_	D	_	3	_	R2	.fastq	_2		D01_PCR_MT_45C_D_3_R2.fastq	move SRS4213436_2.fastq renamed/D01_PCR_MT_45C_D_3_R2.fastq
D1S-45-4	SRS4213437	217235235	SRS4213437	D1	D01	_	PCR	_	MT	_	45C	_	D	_	4	_	R1	.fastq	_1		D01_PCR_MT_45C_D_4_R1.fastq	move SRS4213437_1.fastq renamed/D01_PCR_MT_45C_D_4_R1.fastq
D1S-45-4	SRS4213437	217235235	SRS4213437	D1	D01	_	PCR	_	MT	_	45C	_	D	_	4	_	R2	.fastq	_2		D01_PCR_MT_45C_D_4_R2.fastq	move SRS4213437_2.fastq renamed/D01_PCR_MT_45C_D_4_R2.fastq
D1S-45-5	SRS4213438	217242168	SRS4213438	D1	D01	_	PCR	_	MT	_	45C	_	D	_	5	_	R1	.fastq	_1		D01_PCR_MT_45C_D_5_R1.fastq	move SRS4213438_1.fastq renamed/D01_PCR_MT_45C_D_5_R1.fastq
D1S-45-5	SRS4213438	217242168	SRS4213438	D1	D01	_	PCR	_	MT	_	45C	_	D	_	5	_	R2	.fastq	_2		D01_PCR_MT_45C_D_5_R2.fastq	move SRS4213438_2.fastq renamed/D01_PCR_MT_45C_D_5_R2.fastq
D1S-45-6	SRS4213439	217239233	SRS4213439	D1	D01	_	PCR	_	MT	_	45C	_	D	_	6	_	R1	.fastq	_1		D01_PCR_MT_45C_D_6_R1.fastq	move SRS4213439_1.fastq renamed/D01_PCR_MT_45C_D_6_R1.fastq
D1S-45-6	SRS4213439	217239233	SRS4213439	D1	D01	_	PCR	_	MT	_	45C	_	D	_	6	_	R2	.fastq	_2		D01_PCR_MT_45C_D_6_R2.fastq	move SRS4213439_2.fastq renamed/D01_PCR_MT_45C_D_6_R2.fastq
D1S-45-7	SRS4213440	217239234	SRS4213440	D1	D01	_	PCR	_	MT	_	45C	_	D	_	7	_	R1	.fastq	_1		D01_PCR_MT_45C_D_7_R1.fastq	move SRS4213440_1.fastq renamed/D01_PCR_MT_45C_D_7_R1.fastq
D1S-45-7	SRS4213440	217239234	SRS4213440	D1	D01	_	PCR	_	MT	_	45C	_	D	_	7	_	R2	.fastq	_2		D01_PCR_MT_45C_D_7_R2.fastq	move SRS4213440_2.fastq renamed/D01_PCR_MT_45C_D_7_R2.fastq
D1S-45-8	SRS4213441	217241199	SRS4213441	D1	D01	_	PCR	_	MT	_	45C	_	D	_	8	_	R1	.fastq	_1		D01_PCR_MT_45C_D_8_R1.fastq	move SRS4213441_1.fastq renamed/D01_PCR_MT_45C_D_8_R1.fastq
D1S-45-8	SRS4213441	217241199	SRS4213441	D1	D01	_	PCR	_	MT	_	45C	_	D	_	8	_	R2	.fastq	_2		D01_PCR_MT_45C_D_8_R2.fastq	move SRS4213441_2.fastq renamed/D01_PCR_MT_45C_D_8_R2.fastq
D1S-55-1	SRS4213309	217243192	SRS4213309	D1	D01	_	PCR	_	MT	_	55C	_	D	_	1	_	R1	.fastq	_1		D01_PCR_MT_55C_D_1_R1.fastq	move SRS4213309_1.fastq renamed/D01_PCR_MT_55C_D_1_R1.fastq
D1S-55-1	SRS4213309	217243192	SRS4213309	D1	D01	_	PCR	_	MT	_	55C	_	D	_	1	_	R2	.fastq	_2		D01_PCR_MT_55C_D_1_R2.fastq	move SRS4213309_2.fastq renamed/D01_PCR_MT_55C_D_1_R2.fastq
D1S-55-2	SRS4213315	217240217	SRS4213315	D1	D01	_	PCR	_	MT	_	55C	_	D	_	2	_	R1	.fastq	_1		D01_PCR_MT_55C_D_2_R1.fastq	move SRS4213315_1.fastq renamed/D01_PCR_MT_55C_D_2_R1.fastq
D1S-55-2	SRS4213315	217240217	SRS4213315	D1	D01	_	PCR	_	MT	_	55C	_	D	_	2	_	R2	.fastq	_2		D01_PCR_MT_55C_D_2_R2.fastq	move SRS4213315_2.fastq renamed/D01_PCR_MT_55C_D_2_R2.fastq
D1S-55-3	SRS4213543	217236252	SRS4213543	D1	D01	_	PCR	_	MT	_	55C	_	D	_	3	_	R1	.fastq	_1		D01_PCR_MT_55C_D_3_R1.fastq	move SRS4213543_1.fastq renamed/D01_PCR_MT_55C_D_3_R1.fastq
D1S-55-3	SRS4213543	217236252	SRS4213543	D1	D01	_	PCR	_	MT	_	55C	_	D	_	3	_	R2	.fastq	_2		D01_PCR_MT_55C_D_3_R2.fastq	move SRS4213543_2.fastq renamed/D01_PCR_MT_55C_D_3_R2.fastq
D1S-55-4	SRS4213544	217244191	SRS4213544	D1	D01	_	PCR	_	MT	_	55C	_	D	_	4	_	R1	.fastq	_1		D01_PCR_MT_55C_D_4_R1.fastq	move SRS4213544_1.fastq renamed/D01_PCR_MT_55C_D_4_R1.fastq
D1S-55-4	SRS4213544	217244191	SRS4213544	D1	D01	_	PCR	_	MT	_	55C	_	D	_	4	_	R2	.fastq	_2		D01_PCR_MT_55C_D_4_R2.fastq	move SRS4213544_2.fastq renamed/D01_PCR_MT_55C_D_4_R2.fastq
D1S-55-5	SRS4213316	217245186	SRS4213316	D1	D01	_	PCR	_	MT	_	55C	_	D	_	5	_	R1	.fastq	_1		D01_PCR_MT_55C_D_5_R1.fastq	move SRS4213316_1.fastq renamed/D01_PCR_MT_55C_D_5_R1.fastq
D1S-55-5	SRS4213316	217245186	SRS4213316	D1	D01	_	PCR	_	MT	_	55C	_	D	_	5	_	R2	.fastq	_2		D01_PCR_MT_55C_D_5_R2.fastq	move SRS4213316_2.fastq renamed/D01_PCR_MT_55C_D_5_R2.fastq
D1S-55-6	SRS4213317	217232290	SRS4213317	D1	D01	_	PCR	_	MT	_	55C	_	D	_	6	_	R1	.fastq	_1		D01_PCR_MT_55C_D_6_R1.fastq	move SRS4213317_1.fastq renamed/D01_PCR_MT_55C_D_6_R1.fastq
D1S-55-6	SRS4213317	217232290	SRS4213317	D1	D01	_	PCR	_	MT	_	55C	_	D	_	6	_	R2	.fastq	_2		D01_PCR_MT_55C_D_6_R2.fastq	move SRS4213317_2.fastq renamed/D01_PCR_MT_55C_D_6_R2.fastq
D1S-55-7	SRS4213319	217243195	SRS4213319	D1	D01	_	PCR	_	MT	_	55C	_	D	_	7	_	R1	.fastq	_1		D01_PCR_MT_55C_D_7_R1.fastq	move SRS4213319_1.fastq renamed/D01_PCR_MT_55C_D_7_R1.fastq
D1S-55-7	SRS4213319	217243195	SRS4213319	D1	D01	_	PCR	_	MT	_	55C	_	D	_	7	_	R2	.fastq	_2		D01_PCR_MT_55C_D_7_R2.fastq	move SRS4213319_2.fastq renamed/D01_PCR_MT_55C_D_7_R2.fastq
D1S-55-8	SRS4213318	217244192	SRS4213318	D1	D01	_	PCR	_	MT	_	55C	_	D	_	8	_	R1	.fastq	_1		D01_PCR_MT_55C_D_8_R1.fastq	move SRS4213318_1.fastq renamed/D01_PCR_MT_55C_D_8_R1.fastq
D1S-55-8	SRS4213318	217244192	SRS4213318	D1	D01	_	PCR	_	MT	_	55C	_	D	_	8	_	R2	.fastq	_2		D01_PCR_MT_55C_D_8_R2.fastq	move SRS4213318_2.fastq renamed/D01_PCR_MT_55C_D_8_R2.fastq
D2-45-1	SRS4213371	214661465	SRS4213371	D2	D10	_	DePCR	_	MT	_	45C	_	D	_	1	_	R1	.fastq	_1		D10_DePCR_MT_45C_D_1_R1.fastq	move SRS4213371_1.fastq renamed/D10_DePCR_MT_45C_D_1_R1.fastq
D2-45-1	SRS4213371	214661465	SRS4213371	D2	D10	_	DePCR	_	MT	_	45C	_	D	_	1	_	R2	.fastq	_2		D10_DePCR_MT_45C_D_1_R2.fastq	move SRS4213371_2.fastq renamed/D10_DePCR_MT_45C_D_1_R2.fastq
D2-45-2	SRS4213450	214652458	SRS4213450	D2	D10	_	DePCR	_	MT	_	45C	_	D	_	2	_	R1	.fastq	_1		D10_DePCR_MT_45C_D_2_R1.fastq	move SRS4213450_1.fastq renamed/D10_DePCR_MT_45C_D_2_R1.fastq
D2-45-2	SRS4213450	214652458	SRS4213450	D2	D10	_	DePCR	_	MT	_	45C	_	D	_	2	_	R2	.fastq	_2		D10_DePCR_MT_45C_D_2_R2.fastq	move SRS4213450_2.fastq renamed/D10_DePCR_MT_45C_D_2_R2.fastq
D2-45-3	SRS4213329	214653455	SRS4213329	D2	D10	_	DePCR	_	MT	_	45C	_	D	_	3	_	R1	.fastq	_1		D10_DePCR_MT_45C_D_3_R1.fastq	move SRS4213329_1.fastq renamed/D10_DePCR_MT_45C_D_3_R1.fastq
D2-45-3	SRS4213329	214653455	SRS4213329	D2	D10	_	DePCR	_	MT	_	45C	_	D	_	3	_	R2	.fastq	_2		D10_DePCR_MT_45C_D_3_R2.fastq	move SRS4213329_2.fastq renamed/D10_DePCR_MT_45C_D_3_R2.fastq
D2-45-4	SRS4213328	214657460	SRS4213328	D2	D10	_	DePCR	_	MT	_	45C	_	D	_	4	_	R1	.fastq	_1		D10_DePCR_MT_45C_D_4_R1.fastq	move SRS4213328_1.fastq renamed/D10_DePCR_MT_45C_D_4_R1.fastq
D2-45-4	SRS4213328	214657460	SRS4213328	D2	D10	_	DePCR	_	MT	_	45C	_	D	_	4	_	R2	.fastq	_2		D10_DePCR_MT_45C_D_4_R2.fastq	move SRS4213328_2.fastq renamed/D10_DePCR_MT_45C_D_4_R2.fastq
D2-45-5	SRS4213326	214652460	SRS4213326	D2	D10	_	DePCR	_	MT	_	45C	_	D	_	5	_	R1	.fastq	_1		D10_DePCR_MT_45C_D_5_R1.fastq	move SRS4213326_1.fastq renamed/D10_DePCR_MT_45C_D_5_R1.fastq
D2-45-5	SRS4213326	214652460	SRS4213326	D2	D10	_	DePCR	_	MT	_	45C	_	D	_	5	_	R2	.fastq	_2		D10_DePCR_MT_45C_D_5_R2.fastq	move SRS4213326_2.fastq renamed/D10_DePCR_MT_45C_D_5_R2.fastq
D2-45-6	SRS4213327	214660464	SRS4213327	D2	D10	_	DePCR	_	MT	_	45C	_	D	_	6	_	R1	.fastq	_1		D10_DePCR_MT_45C_D_6_R1.fastq	move SRS4213327_1.fastq renamed/D10_DePCR_MT_45C_D_6_R1.fastq
D2-45-6	SRS4213327	214660464	SRS4213327	D2	D10	_	DePCR	_	MT	_	45C	_	D	_	6	_	R2	.fastq	_2		D10_DePCR_MT_45C_D_6_R2.fastq	move SRS4213327_2.fastq renamed/D10_DePCR_MT_45C_D_6_R2.fastq
D2-45-7	SRS4213324	214661467	SRS4213324	D2	D10	_	DePCR	_	MT	_	45C	_	D	_	7	_	R1	.fastq	_1		D10_DePCR_MT_45C_D_7_R1.fastq	move SRS4213324_1.fastq renamed/D10_DePCR_MT_45C_D_7_R1.fastq
D2-45-7	SRS4213324	214661467	SRS4213324	D2	D10	_	DePCR	_	MT	_	45C	_	D	_	7	_	R2	.fastq	_2		D10_DePCR_MT_45C_D_7_R2.fastq	move SRS4213324_2.fastq renamed/D10_DePCR_MT_45C_D_7_R2.fastq
D2-45-8	SRS4213325	214659458	SRS4213325	D2	D10	_	DePCR	_	MT	_	45C	_	D	_	8	_	R1	.fastq	_1		D10_DePCR_MT_45C_D_8_R1.fastq	move SRS4213325_1.fastq renamed/D10_DePCR_MT_45C_D_8_R1.fastq
D2-45-8	SRS4213325	214659458	SRS4213325	D2	D10	_	DePCR	_	MT	_	45C	_	D	_	8	_	R2	.fastq	_2		D10_DePCR_MT_45C_D_8_R2.fastq	move SRS4213325_2.fastq renamed/D10_DePCR_MT_45C_D_8_R2.fastq
D2-55-1	SRS4213322	214660474	SRS4213322	D2	D10	_	DePCR	_	MT	_	55C	_	D	_	1	_	R1	.fastq	_1		D10_DePCR_MT_55C_D_1_R1.fastq	move SRS4213322_1.fastq renamed/D10_DePCR_MT_55C_D_1_R1.fastq
D2-55-1	SRS4213322	214660474	SRS4213322	D2	D10	_	DePCR	_	MT	_	55C	_	D	_	1	_	R2	.fastq	_2		D10_DePCR_MT_55C_D_1_R2.fastq	move SRS4213322_2.fastq renamed/D10_DePCR_MT_55C_D_1_R2.fastq
D2-55-2	SRS4213323	214657475	SRS4213323	D2	D10	_	DePCR	_	MT	_	55C	_	D	_	2	_	R1	.fastq	_1		D10_DePCR_MT_55C_D_2_R1.fastq	move SRS4213323_1.fastq renamed/D10_DePCR_MT_55C_D_2_R1.fastq
D2-55-2	SRS4213323	214657475	SRS4213323	D2	D10	_	DePCR	_	MT	_	55C	_	D	_	2	_	R2	.fastq	_2		D10_DePCR_MT_55C_D_2_R2.fastq	move SRS4213323_2.fastq renamed/D10_DePCR_MT_55C_D_2_R2.fastq
D2-55-3	SRS4213320	214647470	SRS4213320	D2	D10	_	DePCR	_	MT	_	55C	_	D	_	3	_	R1	.fastq	_1		D10_DePCR_MT_55C_D_3_R1.fastq	move SRS4213320_1.fastq renamed/D10_DePCR_MT_55C_D_3_R1.fastq
D2-55-3	SRS4213320	214647470	SRS4213320	D2	D10	_	DePCR	_	MT	_	55C	_	D	_	3	_	R2	.fastq	_2		D10_DePCR_MT_55C_D_3_R2.fastq	move SRS4213320_2.fastq renamed/D10_DePCR_MT_55C_D_3_R2.fastq
D2-55-4	SRS4213321	214652471	SRS4213321	D2	D10	_	DePCR	_	MT	_	55C	_	D	_	4	_	R1	.fastq	_1		D10_DePCR_MT_55C_D_4_R1.fastq	move SRS4213321_1.fastq renamed/D10_DePCR_MT_55C_D_4_R1.fastq
D2-55-4	SRS4213321	214652471	SRS4213321	D2	D10	_	DePCR	_	MT	_	55C	_	D	_	4	_	R2	.fastq	_2		D10_DePCR_MT_55C_D_4_R2.fastq	move SRS4213321_2.fastq renamed/D10_DePCR_MT_55C_D_4_R2.fastq
D2-55-5	SRS4213742	214645467	SRS4213742	D2	D10	_	DePCR	_	MT	_	55C	_	D	_	5	_	R1	.fastq	_1		D10_DePCR_MT_55C_D_5_R1.fastq	move SRS4213742_1.fastq renamed/D10_DePCR_MT_55C_D_5_R1.fastq
D2-55-5	SRS4213742	214645467	SRS4213742	D2	D10	_	DePCR	_	MT	_	55C	_	D	_	5	_	R2	.fastq	_2		D10_DePCR_MT_55C_D_5_R2.fastq	move SRS4213742_2.fastq renamed/D10_DePCR_MT_55C_D_5_R2.fastq
D2-55-6	SRS4213741	214662476	SRS4213741	D2	D10	_	DePCR	_	MT	_	55C	_	D	_	6	_	R1	.fastq	_1		D10_DePCR_MT_55C_D_6_R1.fastq	move SRS4213741_1.fastq renamed/D10_DePCR_MT_55C_D_6_R1.fastq
D2-55-6	SRS4213741	214662476	SRS4213741	D2	D10	_	DePCR	_	MT	_	55C	_	D	_	6	_	R2	.fastq	_2		D10_DePCR_MT_55C_D_6_R2.fastq	move SRS4213741_2.fastq renamed/D10_DePCR_MT_55C_D_6_R2.fastq
D2-55-7	SRS4213740	214659467	SRS4213740	D2	D10	_	DePCR	_	MT	_	55C	_	D	_	7	_	R1	.fastq	_1		D10_DePCR_MT_55C_D_7_R1.fastq	move SRS4213740_1.fastq renamed/D10_DePCR_MT_55C_D_7_R1.fastq
D2-55-7	SRS4213740	214659467	SRS4213740	D2	D10	_	DePCR	_	MT	_	55C	_	D	_	7	_	R2	.fastq	_2		D10_DePCR_MT_55C_D_7_R2.fastq	move SRS4213740_2.fastq renamed/D10_DePCR_MT_55C_D_7_R2.fastq
D2-55-8	SRS4213739	214654460	SRS4213739	D2	D10	_	DePCR	_	MT	_	55C	_	D	_	8	_	R1	.fastq	_1		D10_DePCR_MT_55C_D_8_R1.fastq	move SRS4213739_1.fastq renamed/D10_DePCR_MT_55C_D_8_R1.fastq
D2-55-8	SRS4213739	214654460	SRS4213739	D2	D10	_	DePCR	_	MT	_	55C	_	D	_	8	_	R2	.fastq	_2		D10_DePCR_MT_55C_D_8_R2.fastq	move SRS4213739_2.fastq renamed/D10_DePCR_MT_55C_D_8_R2.fastq
D2S-45-1	SRS4213313	217243174	SRS4213313	D2	D10	_	PCR	_	MT	_	45C	_	D	_	1	_	R1	.fastq	_1		D10_PCR_MT_45C_D_1_R1.fastq	move SRS4213313_1.fastq renamed/D10_PCR_MT_45C_D_1_R1.fastq
D2S-45-1	SRS4213313	217243174	SRS4213313	D2	D10	_	PCR	_	MT	_	45C	_	D	_	1	_	R2	.fastq	_2		D10_PCR_MT_45C_D_1_R2.fastq	move SRS4213313_2.fastq renamed/D10_PCR_MT_45C_D_1_R2.fastq
D2S-45-2	SRS4213312	217228321	SRS4213312	D2	D10	_	PCR	_	MT	_	45C	_	D	_	2	_	R1	.fastq	_1		D10_PCR_MT_45C_D_2_R1.fastq	move SRS4213312_1.fastq renamed/D10_PCR_MT_45C_D_2_R1.fastq
D2S-45-2	SRS4213312	217228321	SRS4213312	D2	D10	_	PCR	_	MT	_	45C	_	D	_	2	_	R2	.fastq	_2		D10_PCR_MT_45C_D_2_R2.fastq	move SRS4213312_2.fastq renamed/D10_PCR_MT_45C_D_2_R2.fastq
D2S-45-3	SRS4213445	217232265	SRS4213445	D2	D10	_	PCR	_	MT	_	45C	_	D	_	3	_	R1	.fastq	_1		D10_PCR_MT_45C_D_3_R1.fastq	move SRS4213445_1.fastq renamed/D10_PCR_MT_45C_D_3_R1.fastq
D2S-45-3	SRS4213445	217232265	SRS4213445	D2	D10	_	PCR	_	MT	_	45C	_	D	_	3	_	R2	.fastq	_2		D10_PCR_MT_45C_D_3_R2.fastq	move SRS4213445_2.fastq renamed/D10_PCR_MT_45C_D_3_R2.fastq
D2S-45-4	SRS4213314	217243175	SRS4213314	D2	D10	_	PCR	_	MT	_	45C	_	D	_	4	_	R1	.fastq	_1		D10_PCR_MT_45C_D_4_R1.fastq	move SRS4213314_1.fastq renamed/D10_PCR_MT_45C_D_4_R1.fastq
D2S-45-4	SRS4213314	217243175	SRS4213314	D2	D10	_	PCR	_	MT	_	45C	_	D	_	4	_	R2	.fastq	_2		D10_PCR_MT_45C_D_4_R2.fastq	move SRS4213314_2.fastq renamed/D10_PCR_MT_45C_D_4_R2.fastq
D2S-45-5	SRS4213386	217232266	SRS4213386	D2	D10	_	PCR	_	MT	_	45C	_	D	_	5	_	R1	.fastq	_1		D10_PCR_MT_45C_D_5_R1.fastq	move SRS4213386_1.fastq renamed/D10_PCR_MT_45C_D_5_R1.fastq
D2S-45-5	SRS4213386	217232266	SRS4213386	D2	D10	_	PCR	_	MT	_	45C	_	D	_	5	_	R2	.fastq	_2		D10_PCR_MT_45C_D_5_R2.fastq	move SRS4213386_2.fastq renamed/D10_PCR_MT_45C_D_5_R2.fastq
D2S-45-6	SRS4213308	217244162	SRS4213308	D2	D10	_	PCR	_	MT	_	45C	_	D	_	6	_	R1	.fastq	_1		D10_PCR_MT_45C_D_6_R1.fastq	move SRS4213308_1.fastq renamed/D10_PCR_MT_45C_D_6_R1.fastq
D2S-45-6	SRS4213308	217244162	SRS4213308	D2	D10	_	PCR	_	MT	_	45C	_	D	_	6	_	R2	.fastq	_2		D10_PCR_MT_45C_D_6_R2.fastq	move SRS4213308_2.fastq renamed/D10_PCR_MT_45C_D_6_R2.fastq
D2S-45-7	SRS4213678	217242171	SRS4213678	D2	D10	_	PCR	_	MT	_	45C	_	D	_	7	_	R1	.fastq	_1		D10_PCR_MT_45C_D_7_R1.fastq	move SRS4213678_1.fastq renamed/D10_PCR_MT_45C_D_7_R1.fastq
D2S-45-7	SRS4213678	217242171	SRS4213678	D2	D10	_	PCR	_	MT	_	45C	_	D	_	7	_	R2	.fastq	_2		D10_PCR_MT_45C_D_7_R2.fastq	move SRS4213678_2.fastq renamed/D10_PCR_MT_45C_D_7_R2.fastq
D2S-45-8	SRS4213679	217245164	SRS4213679	D2	D10	_	PCR	_	MT	_	45C	_	D	_	8	_	R1	.fastq	_1		D10_PCR_MT_45C_D_8_R1.fastq	move SRS4213679_1.fastq renamed/D10_PCR_MT_45C_D_8_R1.fastq
D2S-45-8	SRS4213679	217245164	SRS4213679	D2	D10	_	PCR	_	MT	_	45C	_	D	_	8	_	R2	.fastq	_2		D10_PCR_MT_45C_D_8_R2.fastq	move SRS4213679_2.fastq renamed/D10_PCR_MT_45C_D_8_R2.fastq
D2S-55-1	SRS4213676	217242196	SRS4213676	D2	D10	_	PCR	_	MT	_	55C	_	D	_	1	_	R1	.fastq	_1		D10_PCR_MT_55C_D_1_R1.fastq	move SRS4213676_1.fastq renamed/D10_PCR_MT_55C_D_1_R1.fastq
D2S-55-1	SRS4213676	217242196	SRS4213676	D2	D10	_	PCR	_	MT	_	55C	_	D	_	1	_	R2	.fastq	_2		D10_PCR_MT_55C_D_1_R2.fastq	move SRS4213676_2.fastq renamed/D10_PCR_MT_55C_D_1_R2.fastq
D2S-55-2	SRS4213677	217245187	SRS4213677	D2	D10	_	PCR	_	MT	_	55C	_	D	_	2	_	R1	.fastq	_1		D10_PCR_MT_55C_D_2_R1.fastq	move SRS4213677_1.fastq renamed/D10_PCR_MT_55C_D_2_R1.fastq
D2S-55-2	SRS4213677	217245187	SRS4213677	D2	D10	_	PCR	_	MT	_	55C	_	D	_	2	_	R2	.fastq	_2		D10_PCR_MT_55C_D_2_R2.fastq	move SRS4213677_2.fastq renamed/D10_PCR_MT_55C_D_2_R2.fastq
D2S-55-3	SRS4213674	217235263	SRS4213674	D2	D10	_	PCR	_	MT	_	55C	_	D	_	3	_	R1	.fastq	_1		D10_PCR_MT_55C_D_3_R1.fastq	move SRS4213674_1.fastq renamed/D10_PCR_MT_55C_D_3_R1.fastq
D2S-55-3	SRS4213674	217235263	SRS4213674	D2	D10	_	PCR	_	MT	_	55C	_	D	_	3	_	R2	.fastq	_2		D10_PCR_MT_55C_D_3_R2.fastq	move SRS4213674_2.fastq renamed/D10_PCR_MT_55C_D_3_R2.fastq
D2S-55-4	SRS4213675	217232292	SRS4213675	D2	D10	_	PCR	_	MT	_	55C	_	D	_	4	_	R1	.fastq	_1		D10_PCR_MT_55C_D_4_R1.fastq	move SRS4213675_1.fastq renamed/D10_PCR_MT_55C_D_4_R1.fastq
D2S-55-4	SRS4213675	217232292	SRS4213675	D2	D10	_	PCR	_	MT	_	55C	_	D	_	4	_	R2	.fastq	_2		D10_PCR_MT_55C_D_4_R2.fastq	move SRS4213675_2.fastq renamed/D10_PCR_MT_55C_D_4_R2.fastq
D2S-55-5	SRS4213672	217251063	SRS4213672	D2	D10	_	PCR	_	MT	_	55C	_	D	_	5	_	R1	.fastq	_1		D10_PCR_MT_55C_D_5_R1.fastq	move SRS4213672_1.fastq renamed/D10_PCR_MT_55C_D_5_R1.fastq
D2S-55-5	SRS4213672	217251063	SRS4213672	D2	D10	_	PCR	_	MT	_	55C	_	D	_	5	_	R2	.fastq	_2		D10_PCR_MT_55C_D_5_R2.fastq	move SRS4213672_2.fastq renamed/D10_PCR_MT_55C_D_5_R2.fastq
D2S-55-6	SRS4213673	217241219	SRS4213673	D2	D10	_	PCR	_	MT	_	55C	_	D	_	6	_	R1	.fastq	_1		D10_PCR_MT_55C_D_6_R1.fastq	move SRS4213673_1.fastq renamed/D10_PCR_MT_55C_D_6_R1.fastq
D2S-55-6	SRS4213673	217241219	SRS4213673	D2	D10	_	PCR	_	MT	_	55C	_	D	_	6	_	R2	.fastq	_2		D10_PCR_MT_55C_D_6_R2.fastq	move SRS4213673_2.fastq renamed/D10_PCR_MT_55C_D_6_R2.fastq
D2S-55-7	SRS4213670	217240219	SRS4213670	D2	D10	_	PCR	_	MT	_	55C	_	D	_	7	_	R1	.fastq	_1		D10_PCR_MT_55C_D_7_R1.fastq	move SRS4213670_1.fastq renamed/D10_PCR_MT_55C_D_7_R1.fastq
D2S-55-7	SRS4213670	217240219	SRS4213670	D2	D10	_	PCR	_	MT	_	55C	_	D	_	7	_	R2	.fastq	_2		D10_PCR_MT_55C_D_7_R2.fastq	move SRS4213670_2.fastq renamed/D10_PCR_MT_55C_D_7_R2.fastq
D2S-55-8	SRS4213671	217245190	SRS4213671	D2	D10	_	PCR	_	MT	_	55C	_	D	_	8	_	R1	.fastq	_1		D10_PCR_MT_55C_D_8_R1.fastq	move SRS4213671_1.fastq renamed/D10_PCR_MT_55C_D_8_R1.fastq
D2S-55-8	SRS4213671	217245190	SRS4213671	D2	D10	_	PCR	_	MT	_	55C	_	D	_	8	_	R2	.fastq	_2		D10_PCR_MT_55C_D_8_R2.fastq	move SRS4213671_2.fastq renamed/D10_PCR_MT_55C_D_8_R2.fastq
E1-45-1	SRS4213738	214647457	SRS4213738	E1	E01	_	DePCR	_	MT	_	45C	_	E	_	1	_	R1	.fastq	_1		E01_DePCR_MT_45C_E_1_R1.fastq	move SRS4213738_1.fastq renamed/E01_DePCR_MT_45C_E_1_R1.fastq
E1-45-1	SRS4213738	214647457	SRS4213738	E1	E01	_	DePCR	_	MT	_	45C	_	E	_	1	_	R2	.fastq	_2		E01_DePCR_MT_45C_E_1_R2.fastq	move SRS4213738_2.fastq renamed/E01_DePCR_MT_45C_E_1_R2.fastq
E1-45-2	SRS4213737	214652462	SRS4213737	E1	E01	_	DePCR	_	MT	_	45C	_	E	_	2	_	R1	.fastq	_1		E01_DePCR_MT_45C_E_2_R1.fastq	move SRS4213737_1.fastq renamed/E01_DePCR_MT_45C_E_2_R1.fastq
E1-45-2	SRS4213737	214652462	SRS4213737	E1	E01	_	DePCR	_	MT	_	45C	_	E	_	2	_	R2	.fastq	_2		E01_DePCR_MT_45C_E_2_R2.fastq	move SRS4213737_2.fastq renamed/E01_DePCR_MT_45C_E_2_R2.fastq
E1-45-3	SRS4213736	214640451	SRS4213736	E1	E01	_	DePCR	_	MT	_	45C	_	E	_	3	_	R1	.fastq	_1		E01_DePCR_MT_45C_E_3_R1.fastq	move SRS4213736_1.fastq renamed/E01_DePCR_MT_45C_E_3_R1.fastq
E1-45-3	SRS4213736	214640451	SRS4213736	E1	E01	_	DePCR	_	MT	_	45C	_	E	_	3	_	R2	.fastq	_2		E01_DePCR_MT_45C_E_3_R2.fastq	move SRS4213736_2.fastq renamed/E01_DePCR_MT_45C_E_3_R2.fastq
E1-45-4	SRS4213735	214651455	SRS4213735	E1	E01	_	DePCR	_	MT	_	45C	_	E	_	4	_	R1	.fastq	_1		E01_DePCR_MT_45C_E_4_R1.fastq	move SRS4213735_1.fastq renamed/E01_DePCR_MT_45C_E_4_R1.fastq
E1-45-4	SRS4213735	214651455	SRS4213735	E1	E01	_	DePCR	_	MT	_	45C	_	E	_	4	_	R2	.fastq	_2		E01_DePCR_MT_45C_E_4_R2.fastq	move SRS4213735_2.fastq renamed/E01_DePCR_MT_45C_E_4_R2.fastq
E1-45-5	SRS4213744	214657461	SRS4213744	E1	E01	_	DePCR	_	MT	_	45C	_	E	_	5	_	R1	.fastq	_1		E01_DePCR_MT_45C_E_5_R1.fastq	move SRS4213744_1.fastq renamed/E01_DePCR_MT_45C_E_5_R1.fastq
E1-45-5	SRS4213744	214657461	SRS4213744	E1	E01	_	DePCR	_	MT	_	45C	_	E	_	5	_	R2	.fastq	_2		E01_DePCR_MT_45C_E_5_R2.fastq	move SRS4213744_2.fastq renamed/E01_DePCR_MT_45C_E_5_R2.fastq
E1-45-6	SRS4213743	214661468	SRS4213743	E1	E01	_	DePCR	_	MT	_	45C	_	E	_	6	_	R1	.fastq	_1		E01_DePCR_MT_45C_E_6_R1.fastq	move SRS4213743_1.fastq renamed/E01_DePCR_MT_45C_E_6_R1.fastq
E1-45-6	SRS4213743	214661468	SRS4213743	E1	E01	_	DePCR	_	MT	_	45C	_	E	_	6	_	R2	.fastq	_2		E01_DePCR_MT_45C_E_6_R2.fastq	move SRS4213743_2.fastq renamed/E01_DePCR_MT_45C_E_6_R2.fastq
E1-45-7	SRS4213586	214661469	SRS4213586	E1	E01	_	DePCR	_	MT	_	45C	_	E	_	7	_	R1	.fastq	_1		E01_DePCR_MT_45C_E_7_R1.fastq	move SRS4213586_1.fastq renamed/E01_DePCR_MT_45C_E_7_R1.fastq
E1-45-7	SRS4213586	214661469	SRS4213586	E1	E01	_	DePCR	_	MT	_	45C	_	E	_	7	_	R2	.fastq	_2		E01_DePCR_MT_45C_E_7_R2.fastq	move SRS4213586_2.fastq renamed/E01_DePCR_MT_45C_E_7_R2.fastq
E1-45-8	SRS4213587	214659460	SRS4213587	E1	E01	_	DePCR	_	MT	_	45C	_	E	_	8	_	R1	.fastq	_1		E01_DePCR_MT_45C_E_8_R1.fastq	move SRS4213587_1.fastq renamed/E01_DePCR_MT_45C_E_8_R1.fastq
E1-45-8	SRS4213587	214659460	SRS4213587	E1	E01	_	DePCR	_	MT	_	45C	_	E	_	8	_	R2	.fastq	_2		E01_DePCR_MT_45C_E_8_R2.fastq	move SRS4213587_2.fastq renamed/E01_DePCR_MT_45C_E_8_R2.fastq
E1-55-1	SRS4213588	214657476	SRS4213588	E1	E01	_	DePCR	_	MT	_	55C	_	E	_	1	_	R1	.fastq	_1		E01_DePCR_MT_55C_E_1_R1.fastq	move SRS4213588_1.fastq renamed/E01_DePCR_MT_55C_E_1_R1.fastq
E1-55-1	SRS4213588	214657476	SRS4213588	E1	E01	_	DePCR	_	MT	_	55C	_	E	_	1	_	R2	.fastq	_2		E01_DePCR_MT_55C_E_1_R2.fastq	move SRS4213588_2.fastq renamed/E01_DePCR_MT_55C_E_1_R2.fastq
E1-55-2	SRS4213589	214647471	SRS4213589	E1	E01	_	DePCR	_	MT	_	55C	_	E	_	2	_	R1	.fastq	_1		E01_DePCR_MT_55C_E_2_R1.fastq	move SRS4213589_1.fastq renamed/E01_DePCR_MT_55C_E_2_R1.fastq
E1-55-2	SRS4213589	214647471	SRS4213589	E1	E01	_	DePCR	_	MT	_	55C	_	E	_	2	_	R2	.fastq	_2		E01_DePCR_MT_55C_E_2_R2.fastq	move SRS4213589_2.fastq renamed/E01_DePCR_MT_55C_E_2_R2.fastq
E1-55-3	SRS4213590	214646480	SRS4213590	E1	E01	_	DePCR	_	MT	_	55C	_	E	_	3	_	R1	.fastq	_1		E01_DePCR_MT_55C_E_3_R1.fastq	move SRS4213590_1.fastq renamed/E01_DePCR_MT_55C_E_3_R1.fastq
E1-55-3	SRS4213590	214646480	SRS4213590	E1	E01	_	DePCR	_	MT	_	55C	_	E	_	3	_	R2	.fastq	_2		E01_DePCR_MT_55C_E_3_R2.fastq	move SRS4213590_2.fastq renamed/E01_DePCR_MT_55C_E_3_R2.fastq
E1-55-4	SRS4213591	214662477	SRS4213591	E1	E01	_	DePCR	_	MT	_	55C	_	E	_	4	_	R1	.fastq	_1		E01_DePCR_MT_55C_E_4_R1.fastq	move SRS4213591_1.fastq renamed/E01_DePCR_MT_55C_E_4_R1.fastq
E1-55-4	SRS4213591	214662477	SRS4213591	E1	E01	_	DePCR	_	MT	_	55C	_	E	_	4	_	R2	.fastq	_2		E01_DePCR_MT_55C_E_4_R2.fastq	move SRS4213591_2.fastq renamed/E01_DePCR_MT_55C_E_4_R2.fastq
E1-55-5	SRS4213592	214653469	SRS4213592	E1	E01	_	DePCR	_	MT	_	55C	_	E	_	5	_	R1	.fastq	_1		E01_DePCR_MT_55C_E_5_R1.fastq	move SRS4213592_1.fastq renamed/E01_DePCR_MT_55C_E_5_R1.fastq
E1-55-5	SRS4213592	214653469	SRS4213592	E1	E01	_	DePCR	_	MT	_	55C	_	E	_	5	_	R2	.fastq	_2		E01_DePCR_MT_55C_E_5_R2.fastq	move SRS4213592_2.fastq renamed/E01_DePCR_MT_55C_E_5_R2.fastq
E1-55-6	SRS4213593	214650471	SRS4213593	E1	E01	_	DePCR	_	MT	_	55C	_	E	_	6	_	R1	.fastq	_1		E01_DePCR_MT_55C_E_6_R1.fastq	move SRS4213593_1.fastq renamed/E01_DePCR_MT_55C_E_6_R1.fastq
E1-55-6	SRS4213593	214650471	SRS4213593	E1	E01	_	DePCR	_	MT	_	55C	_	E	_	6	_	R2	.fastq	_2		E01_DePCR_MT_55C_E_6_R2.fastq	move SRS4213593_2.fastq renamed/E01_DePCR_MT_55C_E_6_R2.fastq
E1-55-7	SRS4213584	214665457	SRS4213584	E1	E01	_	DePCR	_	MT	_	55C	_	E	_	7	_	R1	.fastq	_1		E01_DePCR_MT_55C_E_7_R1.fastq	move SRS4213584_1.fastq renamed/E01_DePCR_MT_55C_E_7_R1.fastq
E1-55-7	SRS4213584	214665457	SRS4213584	E1	E01	_	DePCR	_	MT	_	55C	_	E	_	7	_	R2	.fastq	_2		E01_DePCR_MT_55C_E_7_R2.fastq	move SRS4213584_2.fastq renamed/E01_DePCR_MT_55C_E_7_R2.fastq
E1-55-8	SRS4213585	214660477	SRS4213585	E1	E01	_	DePCR	_	MT	_	55C	_	E	_	8	_	R1	.fastq	_1		E01_DePCR_MT_55C_E_8_R1.fastq	move SRS4213585_1.fastq renamed/E01_DePCR_MT_55C_E_8_R1.fastq
E1-55-8	SRS4213585	214660477	SRS4213585	E1	E01	_	DePCR	_	MT	_	55C	_	E	_	8	_	R2	.fastq	_2		E01_DePCR_MT_55C_E_8_R2.fastq	move SRS4213585_2.fastq renamed/E01_DePCR_MT_55C_E_8_R2.fastq
E1S-45-1	SRS4213759	217249065	SRS4213759	E1	E01	_	PCR	_	MT	_	45C	_	E	_	1	_	R1	.fastq	_1		E01_PCR_MT_45C_E_1_R1.fastq	move SRS4213759_1.fastq renamed/E01_PCR_MT_45C_E_1_R1.fastq
E1S-45-1	SRS4213759	217249065	SRS4213759	E1	E01	_	PCR	_	MT	_	45C	_	E	_	1	_	R2	.fastq	_2		E01_PCR_MT_45C_E_1_R2.fastq	move SRS4213759_2.fastq renamed/E01_PCR_MT_45C_E_1_R2.fastq
E1S-45-2	SRS4213758	217247075	SRS4213758	E1	E01	_	PCR	_	MT	_	45C	_	E	_	2	_	R1	.fastq	_1		E01_PCR_MT_45C_E_2_R1.fastq	move SRS4213758_1.fastq renamed/E01_PCR_MT_45C_E_2_R1.fastq
E1S-45-2	SRS4213758	217247075	SRS4213758	E1	E01	_	PCR	_	MT	_	45C	_	E	_	2	_	R2	.fastq	_2		E01_PCR_MT_45C_E_2_R2.fastq	move SRS4213758_2.fastq renamed/E01_PCR_MT_45C_E_2_R2.fastq
E1S-45-3	SRS4213757	217244165	SRS4213757	E1	E01	_	PCR	_	MT	_	45C	_	E	_	3	_	R1	.fastq	_1		E01_PCR_MT_45C_E_3_R1.fastq	move SRS4213757_1.fastq renamed/E01_PCR_MT_45C_E_3_R1.fastq
E1S-45-3	SRS4213757	217244165	SRS4213757	E1	E01	_	PCR	_	MT	_	45C	_	E	_	3	_	R2	.fastq	_2		E01_PCR_MT_45C_E_3_R2.fastq	move SRS4213757_2.fastq renamed/E01_PCR_MT_45C_E_3_R2.fastq
E1S-45-4	SRS4213756	217235239	SRS4213756	E1	E01	_	PCR	_	MT	_	45C	_	E	_	4	_	R1	.fastq	_1		E01_PCR_MT_45C_E_4_R1.fastq	move SRS4213756_1.fastq renamed/E01_PCR_MT_45C_E_4_R1.fastq
E1S-45-4	SRS4213756	217235239	SRS4213756	E1	E01	_	PCR	_	MT	_	45C	_	E	_	4	_	R2	.fastq	_2		E01_PCR_MT_45C_E_4_R2.fastq	move SRS4213756_2.fastq renamed/E01_PCR_MT_45C_E_4_R2.fastq
E1S-45-5	SRS4213763	217237256	SRS4213763	E1	E01	_	PCR	_	MT	_	45C	_	E	_	5	_	R1	.fastq	_1		E01_PCR_MT_45C_E_5_R1.fastq	move SRS4213763_1.fastq renamed/E01_PCR_MT_45C_E_5_R1.fastq
E1S-45-5	SRS4213763	217237256	SRS4213763	E1	E01	_	PCR	_	MT	_	45C	_	E	_	5	_	R2	.fastq	_2		E01_PCR_MT_45C_E_5_R2.fastq	move SRS4213763_2.fastq renamed/E01_PCR_MT_45C_E_5_R2.fastq
E1S-45-6	SRS4213762	217244166	SRS4213762	E1	E01	_	PCR	_	MT	_	45C	_	E	_	6	_	R1	.fastq	_1		E01_PCR_MT_45C_E_6_R1.fastq	move SRS4213762_1.fastq renamed/E01_PCR_MT_45C_E_6_R1.fastq
E1S-45-6	SRS4213762	217244166	SRS4213762	E1	E01	_	PCR	_	MT	_	45C	_	E	_	6	_	R2	.fastq	_2		E01_PCR_MT_45C_E_6_R2.fastq	move SRS4213762_2.fastq renamed/E01_PCR_MT_45C_E_6_R2.fastq
E1S-45-7	SRS4213761	217244167	SRS4213761	E1	E01	_	PCR	_	MT	_	45C	_	E	_	7	_	R1	.fastq	_1		E01_PCR_MT_45C_E_7_R1.fastq	move SRS4213761_1.fastq renamed/E01_PCR_MT_45C_E_7_R1.fastq
E1S-45-7	SRS4213761	217244167	SRS4213761	E1	E01	_	PCR	_	MT	_	45C	_	E	_	7	_	R2	.fastq	_2		E01_PCR_MT_45C_E_7_R2.fastq	move SRS4213761_2.fastq renamed/E01_PCR_MT_45C_E_7_R2.fastq
E1S-45-8	SRS4213760	217247080	SRS4213760	E1	E01	_	PCR	_	MT	_	45C	_	E	_	8	_	R1	.fastq	_1		E01_PCR_MT_45C_E_8_R1.fastq	move SRS4213760_1.fastq renamed/E01_PCR_MT_45C_E_8_R1.fastq
[truncated: 257 more rows]

[truncated: 4 more sheets: renaming, file_names, combined_data, Table S5]
