# Supplementary material for: Quantitating primer-template interactions using deconstructed PCR
Source: PeerJ. 2024 Aug 8;12:e17787. doi: 10.7717/peerj.17787 (PMC11317036; doi:10.7717/peerj.17787)
Supplement: Table S1 [file peerj-12-17787-s003.xlsx]

## Sheet: Table S1 Primer Sequences
	Primer Name	"Reverse" Primer Sequence	Length	Tm (°C)		CS2 Linker Sequence	Final Primer Sequence Used	Length
	555R	CGGAATTACTGGGCGTAAAGG	21	64.1		TACGGTAGCAGAGACTTGGTCT	TACGGTAGCAGAGACTTGGTCTCGGAATTACTGGGCGTAAAGG	43
Current Primer Name	Initial Primer Name	"Forward" Primer Sequences	Length	Tm (°C)	MMs *	CS1 Linker Sequence	Final Primer Sequence Used	Length
V0	806F_v1	GGACTACCAGGGTATCTAAT	20	57.4	0	ACACTGACGACATGGTTCTACA	ACACTGACGACATGGTTCTACAGGACTACCAGGGTATCTAAT	42
V1	806F_v55	GGACTAGCAGGGTATCTAAT	20	57.8	1	ACACTGACGACATGGTTCTACA	ACACTGACGACATGGTTCTACAGGACTAGCAGGGTATCTAAT	42
V2	806F_v23	GGACTATCAGGGTATCTAAT	20	55.2	1	ACACTGACGACATGGTTCTACA	ACACTGACGACATGGTTCTACAGGACTATCAGGGTATCTAAT	42
V3	806F_v39	GGACTAACAGGGTATCTAAT	20	55.7	1	ACACTGACGACATGGTTCTACA	ACACTGACGACATGGTTCTACAGGACTAACAGGGTATCTAAT	42
V4	806F_v11	GGACTACCAGGGAATCTAAT	20	58	1	ACACTGACGACATGGTTCTACA	ACACTGACGACATGGTTCTACAGGACTACCAGGGAATCTAAT	42
V5	806F_v4	GGACTACCAGGGCATCTAAT	20	60.6	1	ACACTGACGACATGGTTCTACA	ACACTGACGACATGGTTCTACAGGACTACCAGGGCATCTAAT	42
V6	806F_v15	GGACTACCAGGGGATCTAAT	20	59.8	1	ACACTGACGACATGGTTCTACA	ACACTGACGACATGGTTCTACAGGACTACCAGGGGATCTAAT	42
V7	806F_v6	GGACTACCAGGGTATCTACT	20	59.1	1	ACACTGACGACATGGTTCTACA	ACACTGACGACATGGTTCTACAGGACTACCAGGGTATCTACT	42
V8	806F_v8	GGACTACCAGGGTATCTAGT	20	59.1	1	ACACTGACGACATGGTTCTACA	ACACTGACGACATGGTTCTACAGGACTACCAGGGTATCTAGT	42
V9	806F_v7	GGACTACCAGGGTATCTATT	20	57.4	1	ACACTGACGACATGGTTCTACA	ACACTGACGACATGGTTCTACAGGACTACCAGGGTATCTATT	42
V10	806F_v59	GGACTAGCAGGGAATCTAAT	20	58.3	2	ACACTGACGACATGGTTCTACA	ACACTGACGACATGGTTCTACAGGACTAGCAGGGAATCTAAT	42
V11	806F_v27	GGACTATCAGGGAATCTAAT	20	55.8	2	ACACTGACGACATGGTTCTACA	ACACTGACGACATGGTTCTACAGGACTATCAGGGAATCTAAT	42
V12	806F_v43	GGACTAACAGGGAATCTAAT	20	56.2	2	ACACTGACGACATGGTTCTACA	ACACTGACGACATGGTTCTACAGGACTAACAGGGAATCTAAT	42
V13	806F_v51	GGACTAGCAGGGCATCTAAT	20	60.9	2	ACACTGACGACATGGTTCTACA	ACACTGACGACATGGTTCTACAGGACTAGCAGGGCATCTAAT	42
V14	806F_v19	GGACTATCAGGGCATCTAAT	20	58.4	2	ACACTGACGACATGGTTCTACA	ACACTGACGACATGGTTCTACAGGACTATCAGGGCATCTAAT	42
V15	806F_v35	GGACTAACAGGGCATCTAAT	20	58.9	2	ACACTGACGACATGGTTCTACA	ACACTGACGACATGGTTCTACAGGACTAACAGGGCATCTAAT	42
V16	806F_v63	GGACTAGCAGGGGATCTAAT	20	60.1	2	ACACTGACGACATGGTTCTACA	ACACTGACGACATGGTTCTACAGGACTAGCAGGGGATCTAAT	42
V17	806F_v31	GGACTATCAGGGGATCTAAT	20	57.5	2	ACACTGACGACATGGTTCTACA	ACACTGACGACATGGTTCTACAGGACTATCAGGGGATCTAAT	42
V18	806F_v47	GGACTAACAGGGGATCTAAT	20	58	2	ACACTGACGACATGGTTCTACA	ACACTGACGACATGGTTCTACAGGACTAACAGGGGATCTAAT	42
V19	806F_v9	GGACTACCAGGGAATCTACT	20	59.7	2	ACACTGACGACATGGTTCTACA	ACACTGACGACATGGTTCTACAGGACTACCAGGGAATCTACT	42
V20	806F_v2	GGACTACCAGGGCATCTACT	20	62.3	2	ACACTGACGACATGGTTCTACA	ACACTGACGACATGGTTCTACAGGACTACCAGGGCATCTACT	42
V21	806F_v13	GGACTACCAGGGGATCTACT	20	61.5	2	ACACTGACGACATGGTTCTACA	ACACTGACGACATGGTTCTACAGGACTACCAGGGGATCTACT	42
V22	806F_v12	GGACTACCAGGGAATCTAGT	20	59.7	2	ACACTGACGACATGGTTCTACA	ACACTGACGACATGGTTCTACAGGACTACCAGGGAATCTAGT	42
V23	806F_v5	GGACTACCAGGGCATCTAGT	20	62.3	2	ACACTGACGACATGGTTCTACA	ACACTGACGACATGGTTCTACAGGACTACCAGGGCATCTAGT	42
V24	806F_v16	GGACTACCAGGGGATCTAGT	20	61.5	2	ACACTGACGACATGGTTCTACA	ACACTGACGACATGGTTCTACAGGACTACCAGGGGATCTAGT	42
V25	806F_v10	GGACTACCAGGGAATCTATT	20	58	2	ACACTGACGACATGGTTCTACA	ACACTGACGACATGGTTCTACAGGACTACCAGGGAATCTATT	42
V26	806F_v3	GGACTACCAGGGCATCTATT	20	60.6	2	ACACTGACGACATGGTTCTACA	ACACTGACGACATGGTTCTACAGGACTACCAGGGCATCTATT	42
V27	806F_v14	GGACTACCAGGGGATCTATT	20	59.8	2	ACACTGACGACATGGTTCTACA	ACACTGACGACATGGTTCTACAGGACTACCAGGGGATCTATT	42
V28	806F_v53	GGACTAGCAGGGTATCTACT	20	59.4	2	ACACTGACGACATGGTTCTACA	ACACTGACGACATGGTTCTACAGGACTAGCAGGGTATCTACT	42
V29	806F_v21	GGACTATCAGGGTATCTACT	20	56.8	2	ACACTGACGACATGGTTCTACA	ACACTGACGACATGGTTCTACAGGACTATCAGGGTATCTACT	42
V30	806F_v37	GGACTAACAGGGTATCTACT	20	57.3	2	ACACTGACGACATGGTTCTACA	ACACTGACGACATGGTTCTACAGGACTAACAGGGTATCTACT	42
V31	806F_v56	GGACTAGCAGGGTATCTAGT	20	59.4	2	ACACTGACGACATGGTTCTACA	ACACTGACGACATGGTTCTACAGGACTAGCAGGGTATCTAGT	42
V32	806F_v24	GGACTATCAGGGTATCTAGT	20	56.8	2	ACACTGACGACATGGTTCTACA	ACACTGACGACATGGTTCTACAGGACTATCAGGGTATCTAGT	42
V33	806F_v40	GGACTAACAGGGTATCTAGT	20	57.3	2	ACACTGACGACATGGTTCTACA	ACACTGACGACATGGTTCTACAGGACTAACAGGGTATCTAGT	42
V34	806F_v54	GGACTAGCAGGGTATCTATT	20	57.8	2	ACACTGACGACATGGTTCTACA	ACACTGACGACATGGTTCTACAGGACTAGCAGGGTATCTATT	42
V35	806F_v22	GGACTATCAGGGTATCTATT	20	55.2	2	ACACTGACGACATGGTTCTACA	ACACTGACGACATGGTTCTACAGGACTATCAGGGTATCTATT	42
V36	806F_v38	GGACTAACAGGGTATCTATT	20	55.7	2	ACACTGACGACATGGTTCTACA	ACACTGACGACATGGTTCTACAGGACTAACAGGGTATCTATT	42
V37	806F_v57	GGACTAGCAGGGAATCTACT	20	60	3	ACACTGACGACATGGTTCTACA	ACACTGACGACATGGTTCTACAGGACTAGCAGGGAATCTACT	42
V38	806F_v25	GGACTATCAGGGAATCTACT	20	57.4	3	ACACTGACGACATGGTTCTACA	ACACTGACGACATGGTTCTACAGGACTATCAGGGAATCTACT	42
V39	806F_v41	GGACTAACAGGGAATCTACT	20	57.9	3	ACACTGACGACATGGTTCTACA	ACACTGACGACATGGTTCTACAGGACTAACAGGGAATCTACT	42
V40	806F_v49	GGACTAGCAGGGCATCTACT	20	62.6	3	ACACTGACGACATGGTTCTACA	ACACTGACGACATGGTTCTACAGGACTAGCAGGGCATCTACT	42
V41	806F_v17	GGACTATCAGGGCATCTACT	20	60	3	ACACTGACGACATGGTTCTACA	ACACTGACGACATGGTTCTACAGGACTATCAGGGCATCTACT	42
V42	806F_v33	GGACTAACAGGGCATCTACT	20	60.5	3	ACACTGACGACATGGTTCTACA	ACACTGACGACATGGTTCTACAGGACTAACAGGGCATCTACT	42
V43	806F_v61	GGACTAGCAGGGGATCTACT	20	61.7	3	ACACTGACGACATGGTTCTACA	ACACTGACGACATGGTTCTACAGGACTAGCAGGGGATCTACT	42
V44	806F_v29	GGACTATCAGGGGATCTACT	20	59.2	3	ACACTGACGACATGGTTCTACA	ACACTGACGACATGGTTCTACAGGACTATCAGGGGATCTACT	42
V45	806F_v45	GGACTAACAGGGGATCTACT	20	59.7	3	ACACTGACGACATGGTTCTACA	ACACTGACGACATGGTTCTACAGGACTAACAGGGGATCTACT	42
V46	806F_v60	GGACTAGCAGGGAATCTAGT	20	60	3	ACACTGACGACATGGTTCTACA	ACACTGACGACATGGTTCTACAGGACTAGCAGGGAATCTAGT	42
V47	806F_v28	GGACTATCAGGGAATCTAGT	20	57.4	3	ACACTGACGACATGGTTCTACA	ACACTGACGACATGGTTCTACAGGACTATCAGGGAATCTAGT	42
V48	806F_v44	GGACTAACAGGGAATCTAGT	20	57.9	3	ACACTGACGACATGGTTCTACA	ACACTGACGACATGGTTCTACAGGACTAACAGGGAATCTAGT	42
V49	806F_v52	GGACTAGCAGGGCATCTAGT	20	62.6	3	ACACTGACGACATGGTTCTACA	ACACTGACGACATGGTTCTACAGGACTAGCAGGGCATCTAGT	42
V50	806F_v20	GGACTATCAGGGCATCTAGT	20	60	3	ACACTGACGACATGGTTCTACA	ACACTGACGACATGGTTCTACAGGACTATCAGGGCATCTAGT	42
V51	806F_v36	GGACTAACAGGGCATCTAGT	20	60.5	3	ACACTGACGACATGGTTCTACA	ACACTGACGACATGGTTCTACAGGACTAACAGGGCATCTAGT	42
V52	806F_v64	GGACTAGCAGGGGATCTAGT	20	61.7	3	ACACTGACGACATGGTTCTACA	ACACTGACGACATGGTTCTACAGGACTAGCAGGGGATCTAGT	42
V53	806F_v32	GGACTATCAGGGGATCTAGT	20	59.2	3	ACACTGACGACATGGTTCTACA	ACACTGACGACATGGTTCTACAGGACTATCAGGGGATCTAGT	42
V54	806F_v48	GGACTAACAGGGGATCTAGT	20	59.7	3	ACACTGACGACATGGTTCTACA	ACACTGACGACATGGTTCTACAGGACTAACAGGGGATCTAGT	42
V55	806F_v58	GGACTAGCAGGGAATCTATT	20	58.3	3	ACACTGACGACATGGTTCTACA	ACACTGACGACATGGTTCTACAGGACTAGCAGGGAATCTATT	42
V56	806F_v26	GGACTATCAGGGAATCTATT	20	55.8	3	ACACTGACGACATGGTTCTACA	ACACTGACGACATGGTTCTACAGGACTATCAGGGAATCTATT	42
V57	806F_v42	GGACTAACAGGGAATCTATT	20	56.2	3	ACACTGACGACATGGTTCTACA	ACACTGACGACATGGTTCTACAGGACTAACAGGGAATCTATT	42
V58	806F_v50	GGACTAGCAGGGCATCTATT	20	60.9	3	ACACTGACGACATGGTTCTACA	ACACTGACGACATGGTTCTACAGGACTAGCAGGGCATCTATT	42
V59	806F_v18	GGACTATCAGGGCATCTATT	20	58.4	3	ACACTGACGACATGGTTCTACA	ACACTGACGACATGGTTCTACAGGACTATCAGGGCATCTATT	42
V60	806F_v34	GGACTAACAGGGCATCTATT	20	58.9	3	ACACTGACGACATGGTTCTACA	ACACTGACGACATGGTTCTACAGGACTAACAGGGCATCTATT	42
V61	806F_v62	GGACTAGCAGGGGATCTATT	20	60.1	3	ACACTGACGACATGGTTCTACA	ACACTGACGACATGGTTCTACAGGACTAGCAGGGGATCTATT	42
V62	806F_v30	GGACTATCAGGGGATCTATT	20	57.5	3	ACACTGACGACATGGTTCTACA	ACACTGACGACATGGTTCTACAGGACTATCAGGGGATCTATT	42
V63	806F_v46	GGACTAACAGGGGATCTATT	20	58	3	ACACTGACGACATGGTTCTACA	ACACTGACGACATGGTTCTACAGGACTAACAGGGGATCTATT	42
	* Mismatches relative to the first 806 primer, 806F_v1.
