# Supplementary material for: Quantitating primer-template interactions using deconstructed PCR
Source: PeerJ. 2024 Aug 8;12:e17787. doi: 10.7717/peerj.17787 (PMC11317036; doi:10.7717/peerj.17787)
Supplement: Table S2 — Locus-specific primer names and primer sequences are shown next to variant position sequences. Columns N-W represent each of the 10 synthetic DNA templates used in this study, with nucleotide sequences at each potential mismatch position shown in rows 5 and 6. Number of mismatches between templates and primers are colored in columns N-W and rows 7–70. Columns Y-AC indicate which primers are used in which series of experiments (1–6). Rows 72–76 indicate which templates are used in which series of experiments (A-E). Details of mismatches between primers and templates are shown in columns AE-BL. [file peerj-12-17787-s004.xlsx]

## Sheet: Table S2 Pools and Interactions
													Synthetic Templates - # Mismatches between templates and primers											New Primer Pools						Letters represent matching bases by position for each interaction
											Current:		ST0	ST1	ST2	ST3	ST4	ST5	ST6	ST7	ST8	ST9		"1"	"10"	"9"	"27"	"64"		Cell color represents mismatch category
Current	Initial		Full Primer Sequence								Initial:		ST_1	ST_55	ST_23	ST_39	ST_11	ST_4	ST_15	ST_6	ST_8	ST_7
Primer	Primer	Position from 3' End:	-21 thru -15	-14	-13 thru -9	-8	-7 thru -3	-2	-1			3' - 5'	G / A / T	C / A / T	A / A / T	T / A / T	G / T / T	G / G / T	G / C / T	G / A / G	G / A/ C	G / A / A		Original Primer Pools						ST0			ST1			ST2			ST3			ST4			ST5			ST6
Name	Name	Full Primer Sequence		5'		M		3'		5' / Mid / 3' variants		5' - 3'	C / T /A	G / T /A	T / T /A	A / T /A	C / A /A	C / C /A	C / G /A	C / T /C	C / T /G	C / T /T		"1"	"2"	"3"	"4"	"6"		C	T	A	G	T	A	T	T	A	A	T	A	C	A	A	C	C	A	C	G
V0	806F_v1	GGACTACCAGGGTATCTAAT	GGACTA	C	CAGGG	T	CTACCA	A	T	C / T / A			0	1	1	1	1	1	1	1	1	1		1	10			64		C	T	A	C	T	A	C	T	A	C	T	A	C	T	A	C		A	C
V1	806F_v55	GGACTAGCAGGGTATCTAAT	GGACTA	G	CAGGG	T	CTAGCA	A	T	G / T / A			1	0	1	1	2	2	2	2	2	2			10	9		64			T	A	G	T	A	C	T	A	C	T	A			A			A
V2	806F_v23	GGACTATCAGGGTATCTAAT	GGACTA	T	CAGGG	T	CTATCA	A	T	T / T / A			1	1	0	1	2	2	2	2	2	2			10	9		64			T	A	C	T	A	T	T	A	C	T	A			A			A
V3	806F_v39	GGACTAACAGGGTATCTAAT	GGACTA	A	CAGGG	T	CTAACA	A	T	A / T / A			1	1	1	0	2	2	2	2	2	2			10	9		64			T	A	C	T	A	C	T	A	A	T	A			A			A
V4	806F_v11	GGACTACCAGGGAATCTAAT	GGACTA	C	CAGGG	A	CTACCA	A	T	C / A / A			1	2	2	2	0	1	1	2	2	2			10	9		64		C	T	A			A			A			A	C	A	A	C		A	C
V5	806F_v4	GGACTACCAGGGCATCTAAT	GGACTA	C	CAGGG	C	CTACCA	A	T	C / C / A			1	2	2	2	1	0	1	2	2	2			10	9		64		C		A			A			A			A	C		A	C	C	A	C
V6	806F_v15	GGACTACCAGGGGATCTAAT	GGACTA	C	CAGGG	G	CTACCA	A	T	C / G / A			1	2	2	2	1	1	0	2	2	2			10	9		64		C		A			A			A			A	C		A	C		A	C	G
V7	806F_v6	GGACTACCAGGGTATCTACT	GGACTA	C	CAGGG	T	CTACCA	C	T	C / T / C			1	2	2	2	2	2	2	0	1	1			10	9		64		C	T			T			T			T		C			C			C
V8	806F_v8	GGACTACCAGGGTATCTAGT	GGACTA	C	CAGGG	T	CTACCA	G	T	C / T / G			1	2	2	2	2	2	2	1	0	1			10	9		64		C	T			T			T			T		C			C			C
V9	806F_v7	GGACTACCAGGGTATCTATT	GGACTA	C	CAGGG	T	CTACCA	T	T	C / T / T			1	2	2	2	2	2	2	1	1	0			10	9		64		C	T			T			T			T		C			C			C
V10	806F_v59	GGACTAGCAGGGAATCTAAT	GGACTA	G	CAGGG	A	CTAGCA	A	T	G / A / A			2	1	2	2	1	2	2	3	3	3					27	64				A	G		A			A			A		A	A			A
V11	806F_v27	GGACTATCAGGGAATCTAAT	GGACTA	T	CAGGG	A	CTATCA	A	T	T / A / A			2	2	1	2	1	2	2	3	3	3					27	64				A			A	T		A			A		A	A			A
V12	806F_v43	GGACTAACAGGGAATCTAAT	GGACTA	A	CAGGG	A	CTAACA	A	T	A / A / A			2	2	2	1	1	2	2	3	3	3					27	64				A			A			A	A		A		A	A			A
V13	806F_v51	GGACTAGCAGGGCATCTAAT	GGACTA	G	CAGGG	C	CTAGCA	A	T	G / C / A			2	1	2	2	2	1	2	3	3	3					27	64				A	G		A			A			A			A		C	A
V14	806F_v19	GGACTATCAGGGCATCTAAT	GGACTA	T	CAGGG	C	CTATCA	A	T	T / C / A			2	2	1	2	2	1	2	3	3	3					27	64				A			A	T		A			A			A		C	A
V15	806F_v35	GGACTAACAGGGCATCTAAT	GGACTA	A	CAGGG	C	CTAACA	A	T	A / C / A			2	2	2	1	2	1	2	3	3	3					27	64				A			A			A	A		A			A		C	A
V16	806F_v63	GGACTAGCAGGGGATCTAAT	GGACTA	G	CAGGG	G	CTAGCA	A	T	G / G / A			2	1	2	2	2	2	1	3	3	3					27	64				A	G		A			A			A			A			A		G
V17	806F_v31	GGACTATCAGGGGATCTAAT	GGACTA	T	CAGGG	G	CTATCA	A	T	T / G / A			2	2	1	2	2	2	1	3	3	3					27	64				A			A	T		A			A			A			A		G
V18	806F_v47	GGACTAACAGGGGATCTAAT	GGACTA	A	CAGGG	G	CTAACA	A	T	A / G / A			2	2	2	1	2	2	1	3	3	3					27	64				A			A			A	A		A			A			A		G
V19	806F_v9	GGACTACCAGGGAATCTACT	GGACTA	C	CAGGG	A	CTACCA	C	T	C / A / C			2	3	3	3	1	2	2	1	2	2					27	64		C												C	A		C			C
V20	806F_v2	GGACTACCAGGGCATCTACT	GGACTA	C	CAGGG	C	CTACCA	C	T	C / C / C			2	3	3	3	2	1	2	1	2	2					27	64		C												C			C	C		C
V21	806F_v13	GGACTACCAGGGGATCTACT	GGACTA	C	CAGGG	G	CTACCA	C	T	C / G / C			2	3	3	3	2	2	1	1	2	2					27	64		C												C			C			C	G
V22	806F_v12	GGACTACCAGGGAATCTAGT	GGACTA	C	CAGGG	A	CTACCA	G	T	C / A / G			2	3	3	3	1	2	2	2	1	2					27	64		C												C	A		C			C
V23	806F_v5	GGACTACCAGGGCATCTAGT	GGACTA	C	CAGGG	C	CTACCA	G	T	C / C / G			2	3	3	3	2	1	2	2	1	2					27	64		C												C			C	C		C
V24	806F_v16	GGACTACCAGGGGATCTAGT	GGACTA	C	CAGGG	G	CTACCA	G	T	C / G / G			2	3	3	3	2	2	1	2	1	2					27	64		C												C			C			C	G
V25	806F_v10	GGACTACCAGGGAATCTATT	GGACTA	C	CAGGG	A	CTACCA	T	T	C / A / T			2	3	3	3	1	2	2	2	2	1					27	64		C												C	A		C			C
V26	806F_v3	GGACTACCAGGGCATCTATT	GGACTA	C	CAGGG	C	CTACCA	T	T	C / C / T			2	3	3	3	2	1	2	2	2	1					27	64		C												C			C	C		C
V27	806F_v14	GGACTACCAGGGGATCTATT	GGACTA	C	CAGGG	G	CTACCA	T	T	C / G / T			2	3	3	3	2	2	1	2	2	1					27	64		C												C			C			C	G
V28	806F_v53	GGACTAGCAGGGTATCTACT	GGACTA	G	CAGGG	T	CTAGCA	C	T	G / T / C			2	1	2	2	3	3	3	1	2	2					27	64			T		G	T			T			T
V29	806F_v21	GGACTATCAGGGTATCTACT	GGACTA	T	CAGGG	T	CTATCA	C	T	T / T / C			2	2	1	2	3	3	3	1	2	2					27	64			T			T		T	T			T
V30	806F_v37	GGACTAACAGGGTATCTACT	GGACTA	A	CAGGG	T	CTAACA	C	T	A / T / C			2	2	2	1	3	3	3	1	2	2					27	64			T			T			T		A	T
V31	806F_v56	GGACTAGCAGGGTATCTAGT	GGACTA	G	CAGGG	T	CTAGCA	G	T	G / T / G			2	1	2	2	3	3	3	2	1	2					27	64			T		G	T			T			T
V32	806F_v24	GGACTATCAGGGTATCTAGT	GGACTA	T	CAGGG	T	CTATCA	G	T	T / T / G			2	2	1	2	3	3	3	2	1	2					27	64			T			T		T	T			T
V33	806F_v40	GGACTAACAGGGTATCTAGT	GGACTA	A	CAGGG	T	CTAACA	G	T	A / T / G			2	2	2	1	3	3	3	2	1	2					27	64			T			T			T		A	T
V34	806F_v54	GGACTAGCAGGGTATCTATT	GGACTA	G	CAGGG	T	CTAGCA	T	T	G / T / T			2	1	2	2	3	3	3	2	2	1					27	64			T		G	T			T			T
V35	806F_v22	GGACTATCAGGGTATCTATT	GGACTA	T	CAGGG	T	CTATCA	T	T	T / T / T			2	2	1	2	3	3	3	2	2	1					27	64			T			T		T	T			T
V36	806F_v38	GGACTAACAGGGTATCTATT	GGACTA	A	CAGGG	T	CTAACA	T	T	A / T / T			2	2	2	1	3	3	3	2	2	1					27	64			T			T			T		A	T
V37	806F_v57	GGACTAGCAGGGAATCTACT	GGACTA	G	CAGGG	A	CTAGCA	C	T	G / A / C			3	2	3	3	2	3	3	2	3	3						64					G										A
V38	806F_v25	GGACTATCAGGGAATCTACT	GGACTA	T	CAGGG	A	CTATCA	C	T	T / A / C			3	3	2	3	2	3	3	2	3	3						64								T							A
V39	806F_v41	GGACTAACAGGGAATCTACT	GGACTA	A	CAGGG	A	CTAACA	C	T	A / A / C			3	3	3	2	2	3	3	2	3	3						64											A				A
V40	806F_v49	GGACTAGCAGGGCATCTACT	GGACTA	G	CAGGG	C	CTAGCA	C	T	G / C / C			3	2	3	3	3	2	3	2	3	3						64					G													C
V41	806F_v17	GGACTATCAGGGCATCTACT	GGACTA	T	CAGGG	C	CTATCA	C	T	T / C / C			3	3	2	3	3	2	3	2	3	3						64								T										C
V42	806F_v33	GGACTAACAGGGCATCTACT	GGACTA	A	CAGGG	C	CTAACA	C	T	A / C / C			3	3	3	2	3	2	3	2	3	3						64											A							C
V43	806F_v61	GGACTAGCAGGGGATCTACT	GGACTA	G	CAGGG	G	CTAGCA	C	T	G / G / C			3	2	3	3	3	3	2	2	3	3						64					G																G
V44	806F_v29	GGACTATCAGGGGATCTACT	GGACTA	T	CAGGG	G	CTATCA	C	T	T / G / C			3	3	2	3	3	3	2	2	3	3						64								T													G
V45	806F_v45	GGACTAACAGGGGATCTACT	GGACTA	A	CAGGG	G	CTAACA	C	T	A / G / C			3	3	3	2	3	3	2	2	3	3						64											A										G
V46	806F_v60	GGACTAGCAGGGAATCTAGT	GGACTA	G	CAGGG	A	CTAGCA	G	T	G / A / G			3	2	3	3	2	3	3	3	2	3						64					G										A
V47	806F_v28	GGACTATCAGGGAATCTAGT	GGACTA	T	CAGGG	A	CTATCA	G	T	T / A / G			3	3	2	3	2	3	3	3	2	3						64								T							A
V48	806F_v44	GGACTAACAGGGAATCTAGT	GGACTA	A	CAGGG	A	CTAACA	G	T	A / A / G			3	3	3	2	2	3	3	3	2	3						64											A				A
V49	806F_v52	GGACTAGCAGGGCATCTAGT	GGACTA	G	CAGGG	C	CTAGCA	G	T	G / C / G			3	2	3	3	3	2	3	3	2	3						64					G													C
V50	806F_v20	GGACTATCAGGGCATCTAGT	GGACTA	T	CAGGG	C	CTATCA	G	T	T / C / G			3	3	2	3	3	2	3	3	2	3						64								T										C
V51	806F_v36	GGACTAACAGGGCATCTAGT	GGACTA	A	CAGGG	C	CTAACA	G	T	A / C / G			3	3	3	2	3	2	3	3	2	3						64											A							C
V52	806F_v64	GGACTAGCAGGGGATCTAGT	GGACTA	G	CAGGG	G	CTAGCA	G	T	G / G / G			3	2	3	3	3	3	2	3	2	3						64					G																G
V53	806F_v32	GGACTATCAGGGGATCTAGT	GGACTA	T	CAGGG	G	CTATCA	G	T	T / G / G			3	3	2	3	3	3	2	3	2	3						64								T													G
V54	806F_v48	GGACTAACAGGGGATCTAGT	GGACTA	A	CAGGG	G	CTAACA	G	T	A / G / G			3	3	3	2	3	3	2	3	2	3						64											A										G
V55	806F_v58	GGACTAGCAGGGAATCTATT	GGACTA	G	CAGGG	A	CTAGCA	T	T	G / A / T			3	2	3	3	2	3	3	3	3	2						64					G										A
V56	806F_v26	GGACTATCAGGGAATCTATT	GGACTA	T	CAGGG	A	CTATCA	T	T	T / A / T			3	3	2	3	2	3	3	3	3	2						64								T							A
V57	806F_v42	GGACTAACAGGGAATCTATT	GGACTA	A	CAGGG	A	CTAACA	T	T	A / A / T			3	3	3	2	2	3	3	3	3	2						64											A				A
V58	806F_v50	GGACTAGCAGGGCATCTATT	GGACTA	G	CAGGG	C	CTAGCA	T	T	G / C / T			3	2	3	3	3	2	3	3	3	2						64					G													C
V59	806F_v18	GGACTATCAGGGCATCTATT	GGACTA	T	CAGGG	C	CTATCA	T	T	T / C / T			3	3	2	3	3	2	3	3	3	2						64								T										C
V60	806F_v34	GGACTAACAGGGCATCTATT	GGACTA	A	CAGGG	C	CTAACA	T	T	A / C / T			3	3	3	2	3	2	3	3	3	2						64											A							C
V61	806F_v62	GGACTAGCAGGGGATCTATT	GGACTA	G	CAGGG	G	CTAGCA	T	T	G / G / T			3	2	3	3	3	3	2	3	3	2						64					G																G
V62	806F_v30	GGACTATCAGGGGATCTATT	GGACTA	T	CAGGG	G	CTATCA	T	T	T / G / T			3	3	2	3	3	3	2	3	3	2						64								T													G
V63	806F_v46	GGACTAACAGGGGATCTATT	GGACTA	A	CAGGG	G	CTAACA	T	T	A / G / T			3	3	3	2	3	3	2	3	3	2						64											A										G
											Template pools	A	A
												B	B	B	B	B	B	B	B	B	B	B
												C	C x0.1	C	C	C	C	C	C	C	C	C
												D	D							D x2	D x8	D x4
												E	E				E x4	E x2	E x8
													Templates were combined as equal parts (1) except as noted.
[truncated: 15 more columns]
