# Supplementary material for: Quantitating primer-template interactions using deconstructed PCR
Source: PeerJ. 2024 Aug 8;12:e17787. doi: 10.7717/peerj.17787 (PMC11317036; doi:10.7717/peerj.17787)
Supplement: Table S3 — This mapping files is used by the script described in the text and provided in Supplemental Materials 2. [file peerj-12-17787-s005.xlsx]

## Sheet: Table S3 Mapping
current_template_name	current_primer_name	R_feature_name	template_recognition_sequence	variable positions -14,-8,-2 from 3' end	Primer Seq (5'-3')	initial_template_name	initial_primer_name
ST0	V0	ST00V00	CGATCTCTACGC	CTA	GGACTACCAGGGTATCTAAT	st1	v1
ST0	V1	ST00V01	CGATCTCTACGC	GTA	GGACTAGCAGGGTATCTAAT	st1	v55
ST0	V2	ST00V02	CGATCTCTACGC	TTA	GGACTATCAGGGTATCTAAT	st1	v23
ST0	V3	ST00V03	CGATCTCTACGC	ATA	GGACTAACAGGGTATCTAAT	st1	v39
ST0	V4	ST00V04	CGATCTCTACGC	CAA	GGACTACCAGGGAATCTAAT	st1	v11
ST0	V5	ST00V05	CGATCTCTACGC	CCA	GGACTACCAGGGCATCTAAT	st1	v4
ST0	V6	ST00V06	CGATCTCTACGC	CGA	GGACTACCAGGGGATCTAAT	st1	v15
ST0	V7	ST00V07	CGATCTCTACGC	CTC	GGACTACCAGGGTATCTACT	st1	v6
ST0	V8	ST00V08	CGATCTCTACGC	CTG	GGACTACCAGGGTATCTAGT	st1	v8
ST0	V9	ST00V09	CGATCTCTACGC	CTT	GGACTACCAGGGTATCTATT	st1	v7
ST0	V10	ST00V10	CGATCTCTACGC	GAA	GGACTAGCAGGGAATCTAAT	st1	v59
ST0	V11	ST00V11	CGATCTCTACGC	TAA	GGACTATCAGGGAATCTAAT	st1	v27
ST0	V12	ST00V12	CGATCTCTACGC	AAA	GGACTAACAGGGAATCTAAT	st1	v43
ST0	V13	ST00V13	CGATCTCTACGC	GCA	GGACTAGCAGGGCATCTAAT	st1	v51
ST0	V14	ST00V14	CGATCTCTACGC	TCA	GGACTATCAGGGCATCTAAT	st1	v19
ST0	V15	ST00V15	CGATCTCTACGC	ACA	GGACTAACAGGGCATCTAAT	st1	v35
ST0	V16	ST00V16	CGATCTCTACGC	GGA	GGACTAGCAGGGGATCTAAT	st1	v63
ST0	V17	ST00V17	CGATCTCTACGC	TGA	GGACTATCAGGGGATCTAAT	st1	v31
ST0	V18	ST00V18	CGATCTCTACGC	AGA	GGACTAACAGGGGATCTAAT	st1	v47
ST0	V19	ST00V19	CGATCTCTACGC	CAC	GGACTACCAGGGAATCTACT	st1	v9
ST0	V20	ST00V20	CGATCTCTACGC	CCC	GGACTACCAGGGCATCTACT	st1	v2
ST0	V21	ST00V21	CGATCTCTACGC	CGC	GGACTACCAGGGGATCTACT	st1	v13
ST0	V22	ST00V22	CGATCTCTACGC	CAG	GGACTACCAGGGAATCTAGT	st1	v12
ST0	V23	ST00V23	CGATCTCTACGC	CCG	GGACTACCAGGGCATCTAGT	st1	v5
ST0	V24	ST00V24	CGATCTCTACGC	CGG	GGACTACCAGGGGATCTAGT	st1	v16
ST0	V25	ST00V25	CGATCTCTACGC	CAT	GGACTACCAGGGAATCTATT	st1	v10
ST0	V26	ST00V26	CGATCTCTACGC	CCT	GGACTACCAGGGCATCTATT	st1	v3
ST0	V27	ST00V27	CGATCTCTACGC	CGT	GGACTACCAGGGGATCTATT	st1	v14
ST0	V28	ST00V28	CGATCTCTACGC	GTC	GGACTAGCAGGGTATCTACT	st1	v53
ST0	V29	ST00V29	CGATCTCTACGC	TTC	GGACTATCAGGGTATCTACT	st1	v21
ST0	V30	ST00V30	CGATCTCTACGC	ATC	GGACTAACAGGGTATCTACT	st1	v37
ST0	V31	ST00V31	CGATCTCTACGC	GTG	GGACTAGCAGGGTATCTAGT	st1	v56
ST0	V32	ST00V32	CGATCTCTACGC	TTG	GGACTATCAGGGTATCTAGT	st1	v24
ST0	V33	ST00V33	CGATCTCTACGC	ATG	GGACTAACAGGGTATCTAGT	st1	v40
ST0	V34	ST00V34	CGATCTCTACGC	GTT	GGACTAGCAGGGTATCTATT	st1	v54
ST0	V35	ST00V35	CGATCTCTACGC	TTT	GGACTATCAGGGTATCTATT	st1	v22
ST0	V36	ST00V36	CGATCTCTACGC	ATT	GGACTAACAGGGTATCTATT	st1	v38
ST0	V37	ST00V37	CGATCTCTACGC	GAC	GGACTAGCAGGGAATCTACT	st1	v57
ST0	V38	ST00V38	CGATCTCTACGC	TAC	GGACTATCAGGGAATCTACT	st1	v25
ST0	V39	ST00V39	CGATCTCTACGC	AAC	GGACTAACAGGGAATCTACT	st1	v41
ST0	V40	ST00V40	CGATCTCTACGC	GCC	GGACTAGCAGGGCATCTACT	st1	v49
ST0	V41	ST00V41	CGATCTCTACGC	TCC	GGACTATCAGGGCATCTACT	st1	v17
ST0	V42	ST00V42	CGATCTCTACGC	ACC	GGACTAACAGGGCATCTACT	st1	v33
ST0	V43	ST00V43	CGATCTCTACGC	GGC	GGACTAGCAGGGGATCTACT	st1	v61
ST0	V44	ST00V44	CGATCTCTACGC	TGC	GGACTATCAGGGGATCTACT	st1	v29
ST0	V45	ST00V45	CGATCTCTACGC	AGC	GGACTAACAGGGGATCTACT	st1	v45
ST0	V46	ST00V46	CGATCTCTACGC	GAG	GGACTAGCAGGGAATCTAGT	st1	v60
ST0	V47	ST00V47	CGATCTCTACGC	TAG	GGACTATCAGGGAATCTAGT	st1	v28
ST0	V48	ST00V48	CGATCTCTACGC	AAG	GGACTAACAGGGAATCTAGT	st1	v44
ST0	V49	ST00V49	CGATCTCTACGC	GCG	GGACTAGCAGGGCATCTAGT	st1	v52
ST0	V50	ST00V50	CGATCTCTACGC	TCG	GGACTATCAGGGCATCTAGT	st1	v20
ST0	V51	ST00V51	CGATCTCTACGC	ACG	GGACTAACAGGGCATCTAGT	st1	v36
ST0	V52	ST00V52	CGATCTCTACGC	GGG	GGACTAGCAGGGGATCTAGT	st1	v64
ST0	V53	ST00V53	CGATCTCTACGC	TGG	GGACTATCAGGGGATCTAGT	st1	v32
ST0	V54	ST00V54	CGATCTCTACGC	AGG	GGACTAACAGGGGATCTAGT	st1	v48
ST0	V55	ST00V55	CGATCTCTACGC	GAT	GGACTAGCAGGGAATCTATT	st1	v58
ST0	V56	ST00V56	CGATCTCTACGC	TAT	GGACTATCAGGGAATCTATT	st1	v26
ST0	V57	ST00V57	CGATCTCTACGC	AAT	GGACTAACAGGGAATCTATT	st1	v42
ST0	V58	ST00V58	CGATCTCTACGC	GCT	GGACTAGCAGGGCATCTATT	st1	v50
ST0	V59	ST00V59	CGATCTCTACGC	TCT	GGACTATCAGGGCATCTATT	st1	v18
ST0	V60	ST00V60	CGATCTCTACGC	ACT	GGACTAACAGGGCATCTATT	st1	v34
ST0	V61	ST00V61	CGATCTCTACGC	GGT	GGACTAGCAGGGGATCTATT	st1	v62
ST0	V62	ST00V62	CGATCTCTACGC	TGT	GGACTATCAGGGGATCTATT	st1	v30
ST0	V63	ST00V63	CGATCTCTACGC	AGT	GGACTAACAGGGGATCTATT	st1	v46
ST1	V0	ST01V00	CTTACCAGTCGC	CTA	GGACTACCAGGGTATCTAAT	st55	v1
ST1	V1	ST01V01	CTTACCAGTCGC	GTA	GGACTAGCAGGGTATCTAAT	st55	v55
ST1	V2	ST01V02	CTTACCAGTCGC	TTA	GGACTATCAGGGTATCTAAT	st55	v23
ST1	V3	ST01V03	CTTACCAGTCGC	ATA	GGACTAACAGGGTATCTAAT	st55	v39
ST1	V4	ST01V04	CTTACCAGTCGC	CAA	GGACTACCAGGGAATCTAAT	st55	v11
ST1	V5	ST01V05	CTTACCAGTCGC	CCA	GGACTACCAGGGCATCTAAT	st55	v4
ST1	V6	ST01V06	CTTACCAGTCGC	CGA	GGACTACCAGGGGATCTAAT	st55	v15
ST1	V7	ST01V07	CTTACCAGTCGC	CTC	GGACTACCAGGGTATCTACT	st55	v6
ST1	V8	ST01V08	CTTACCAGTCGC	CTG	GGACTACCAGGGTATCTAGT	st55	v8
ST1	V9	ST01V09	CTTACCAGTCGC	CTT	GGACTACCAGGGTATCTATT	st55	v7
ST1	V10	ST01V10	CTTACCAGTCGC	GAA	GGACTAGCAGGGAATCTAAT	st55	v59
ST1	V11	ST01V11	CTTACCAGTCGC	TAA	GGACTATCAGGGAATCTAAT	st55	v27
ST1	V12	ST01V12	CTTACCAGTCGC	AAA	GGACTAACAGGGAATCTAAT	st55	v43
ST1	V13	ST01V13	CTTACCAGTCGC	GCA	GGACTAGCAGGGCATCTAAT	st55	v51
ST1	V14	ST01V14	CTTACCAGTCGC	TCA	GGACTATCAGGGCATCTAAT	st55	v19
ST1	V15	ST01V15	CTTACCAGTCGC	ACA	GGACTAACAGGGCATCTAAT	st55	v35
ST1	V16	ST01V16	CTTACCAGTCGC	GGA	GGACTAGCAGGGGATCTAAT	st55	v63
ST1	V17	ST01V17	CTTACCAGTCGC	TGA	GGACTATCAGGGGATCTAAT	st55	v31
ST1	V18	ST01V18	CTTACCAGTCGC	AGA	GGACTAACAGGGGATCTAAT	st55	v47
ST1	V19	ST01V19	CTTACCAGTCGC	CAC	GGACTACCAGGGAATCTACT	st55	v9
ST1	V20	ST01V20	CTTACCAGTCGC	CCC	GGACTACCAGGGCATCTACT	st55	v2
ST1	V21	ST01V21	CTTACCAGTCGC	CGC	GGACTACCAGGGGATCTACT	st55	v13
ST1	V22	ST01V22	CTTACCAGTCGC	CAG	GGACTACCAGGGAATCTAGT	st55	v12
ST1	V23	ST01V23	CTTACCAGTCGC	CCG	GGACTACCAGGGCATCTAGT	st55	v5
ST1	V24	ST01V24	CTTACCAGTCGC	CGG	GGACTACCAGGGGATCTAGT	st55	v16
ST1	V25	ST01V25	CTTACCAGTCGC	CAT	GGACTACCAGGGAATCTATT	st55	v10
ST1	V26	ST01V26	CTTACCAGTCGC	CCT	GGACTACCAGGGCATCTATT	st55	v3
ST1	V27	ST01V27	CTTACCAGTCGC	CGT	GGACTACCAGGGGATCTATT	st55	v14
ST1	V28	ST01V28	CTTACCAGTCGC	GTC	GGACTAGCAGGGTATCTACT	st55	v53
ST1	V29	ST01V29	CTTACCAGTCGC	TTC	GGACTATCAGGGTATCTACT	st55	v21
ST1	V30	ST01V30	CTTACCAGTCGC	ATC	GGACTAACAGGGTATCTACT	st55	v37
ST1	V31	ST01V31	CTTACCAGTCGC	GTG	GGACTAGCAGGGTATCTAGT	st55	v56
ST1	V32	ST01V32	CTTACCAGTCGC	TTG	GGACTATCAGGGTATCTAGT	st55	v24
ST1	V33	ST01V33	CTTACCAGTCGC	ATG	GGACTAACAGGGTATCTAGT	st55	v40
ST1	V34	ST01V34	CTTACCAGTCGC	GTT	GGACTAGCAGGGTATCTATT	st55	v54
ST1	V35	ST01V35	CTTACCAGTCGC	TTT	GGACTATCAGGGTATCTATT	st55	v22
ST1	V36	ST01V36	CTTACCAGTCGC	ATT	GGACTAACAGGGTATCTATT	st55	v38
ST1	V37	ST01V37	CTTACCAGTCGC	GAC	GGACTAGCAGGGAATCTACT	st55	v57
ST1	V38	ST01V38	CTTACCAGTCGC	TAC	GGACTATCAGGGAATCTACT	st55	v25
ST1	V39	ST01V39	CTTACCAGTCGC	AAC	GGACTAACAGGGAATCTACT	st55	v41
ST1	V40	ST01V40	CTTACCAGTCGC	GCC	GGACTAGCAGGGCATCTACT	st55	v49
ST1	V41	ST01V41	CTTACCAGTCGC	TCC	GGACTATCAGGGCATCTACT	st55	v17
ST1	V42	ST01V42	CTTACCAGTCGC	ACC	GGACTAACAGGGCATCTACT	st55	v33
ST1	V43	ST01V43	CTTACCAGTCGC	GGC	GGACTAGCAGGGGATCTACT	st55	v61
ST1	V44	ST01V44	CTTACCAGTCGC	TGC	GGACTATCAGGGGATCTACT	st55	v29
ST1	V45	ST01V45	CTTACCAGTCGC	AGC	GGACTAACAGGGGATCTACT	st55	v45
ST1	V46	ST01V46	CTTACCAGTCGC	GAG	GGACTAGCAGGGAATCTAGT	st55	v60
ST1	V47	ST01V47	CTTACCAGTCGC	TAG	GGACTATCAGGGAATCTAGT	st55	v28
ST1	V48	ST01V48	CTTACCAGTCGC	AAG	GGACTAACAGGGAATCTAGT	st55	v44
ST1	V49	ST01V49	CTTACCAGTCGC	GCG	GGACTAGCAGGGCATCTAGT	st55	v52
ST1	V50	ST01V50	CTTACCAGTCGC	TCG	GGACTATCAGGGCATCTAGT	st55	v20
ST1	V51	ST01V51	CTTACCAGTCGC	ACG	GGACTAACAGGGCATCTAGT	st55	v36
ST1	V52	ST01V52	CTTACCAGTCGC	GGG	GGACTAGCAGGGGATCTAGT	st55	v64
ST1	V53	ST01V53	CTTACCAGTCGC	TGG	GGACTATCAGGGGATCTAGT	st55	v32
ST1	V54	ST01V54	CTTACCAGTCGC	AGG	GGACTAACAGGGGATCTAGT	st55	v48
ST1	V55	ST01V55	CTTACCAGTCGC	GAT	GGACTAGCAGGGAATCTATT	st55	v58
ST1	V56	ST01V56	CTTACCAGTCGC	TAT	GGACTATCAGGGAATCTATT	st55	v26
ST1	V57	ST01V57	CTTACCAGTCGC	AAT	GGACTAACAGGGAATCTATT	st55	v42
ST1	V58	ST01V58	CTTACCAGTCGC	GCT	GGACTAGCAGGGCATCTATT	st55	v50
ST1	V59	ST01V59	CTTACCAGTCGC	TCT	GGACTATCAGGGCATCTATT	st55	v18
ST1	V60	ST01V60	CTTACCAGTCGC	ACT	GGACTAACAGGGCATCTATT	st55	v34
ST1	V61	ST01V61	CTTACCAGTCGC	GGT	GGACTAGCAGGGGATCTATT	st55	v62
ST1	V62	ST01V62	CTTACCAGTCGC	TGT	GGACTATCAGGGGATCTATT	st55	v30
ST1	V63	ST01V63	CTTACCAGTCGC	AGT	GGACTAACAGGGGATCTATT	st55	v46
ST2	V0	ST02V00	TGCCAGCCCTAT	CTA	GGACTACCAGGGTATCTAAT	st23	v1
ST2	V1	ST02V01	TGCCAGCCCTAT	GTA	GGACTAGCAGGGTATCTAAT	st23	v55
ST2	V2	ST02V02	TGCCAGCCCTAT	TTA	GGACTATCAGGGTATCTAAT	st23	v23
ST2	V3	ST02V03	TGCCAGCCCTAT	ATA	GGACTAACAGGGTATCTAAT	st23	v39
ST2	V4	ST02V04	TGCCAGCCCTAT	CAA	GGACTACCAGGGAATCTAAT	st23	v11
ST2	V5	ST02V05	TGCCAGCCCTAT	CCA	GGACTACCAGGGCATCTAAT	st23	v4
ST2	V6	ST02V06	TGCCAGCCCTAT	CGA	GGACTACCAGGGGATCTAAT	st23	v15
ST2	V7	ST02V07	TGCCAGCCCTAT	CTC	GGACTACCAGGGTATCTACT	st23	v6
ST2	V8	ST02V08	TGCCAGCCCTAT	CTG	GGACTACCAGGGTATCTAGT	st23	v8
ST2	V9	ST02V09	TGCCAGCCCTAT	CTT	GGACTACCAGGGTATCTATT	st23	v7
ST2	V10	ST02V10	TGCCAGCCCTAT	GAA	GGACTAGCAGGGAATCTAAT	st23	v59
ST2	V11	ST02V11	TGCCAGCCCTAT	TAA	GGACTATCAGGGAATCTAAT	st23	v27
ST2	V12	ST02V12	TGCCAGCCCTAT	AAA	GGACTAACAGGGAATCTAAT	st23	v43
ST2	V13	ST02V13	TGCCAGCCCTAT	GCA	GGACTAGCAGGGCATCTAAT	st23	v51
ST2	V14	ST02V14	TGCCAGCCCTAT	TCA	GGACTATCAGGGCATCTAAT	st23	v19
ST2	V15	ST02V15	TGCCAGCCCTAT	ACA	GGACTAACAGGGCATCTAAT	st23	v35
ST2	V16	ST02V16	TGCCAGCCCTAT	GGA	GGACTAGCAGGGGATCTAAT	st23	v63
ST2	V17	ST02V17	TGCCAGCCCTAT	TGA	GGACTATCAGGGGATCTAAT	st23	v31
ST2	V18	ST02V18	TGCCAGCCCTAT	AGA	GGACTAACAGGGGATCTAAT	st23	v47
ST2	V19	ST02V19	TGCCAGCCCTAT	CAC	GGACTACCAGGGAATCTACT	st23	v9
ST2	V20	ST02V20	TGCCAGCCCTAT	CCC	GGACTACCAGGGCATCTACT	st23	v2
ST2	V21	ST02V21	TGCCAGCCCTAT	CGC	GGACTACCAGGGGATCTACT	st23	v13
ST2	V22	ST02V22	TGCCAGCCCTAT	CAG	GGACTACCAGGGAATCTAGT	st23	v12
ST2	V23	ST02V23	TGCCAGCCCTAT	CCG	GGACTACCAGGGCATCTAGT	st23	v5
ST2	V24	ST02V24	TGCCAGCCCTAT	CGG	GGACTACCAGGGGATCTAGT	st23	v16
ST2	V25	ST02V25	TGCCAGCCCTAT	CAT	GGACTACCAGGGAATCTATT	st23	v10
ST2	V26	ST02V26	TGCCAGCCCTAT	CCT	GGACTACCAGGGCATCTATT	st23	v3
ST2	V27	ST02V27	TGCCAGCCCTAT	CGT	GGACTACCAGGGGATCTATT	st23	v14
ST2	V28	ST02V28	TGCCAGCCCTAT	GTC	GGACTAGCAGGGTATCTACT	st23	v53
ST2	V29	ST02V29	TGCCAGCCCTAT	TTC	GGACTATCAGGGTATCTACT	st23	v21
ST2	V30	ST02V30	TGCCAGCCCTAT	ATC	GGACTAACAGGGTATCTACT	st23	v37
ST2	V31	ST02V31	TGCCAGCCCTAT	GTG	GGACTAGCAGGGTATCTAGT	st23	v56
ST2	V32	ST02V32	TGCCAGCCCTAT	TTG	GGACTATCAGGGTATCTAGT	st23	v24
ST2	V33	ST02V33	TGCCAGCCCTAT	ATG	GGACTAACAGGGTATCTAGT	st23	v40
ST2	V34	ST02V34	TGCCAGCCCTAT	GTT	GGACTAGCAGGGTATCTATT	st23	v54
ST2	V35	ST02V35	TGCCAGCCCTAT	TTT	GGACTATCAGGGTATCTATT	st23	v22
ST2	V36	ST02V36	TGCCAGCCCTAT	ATT	GGACTAACAGGGTATCTATT	st23	v38
ST2	V37	ST02V37	TGCCAGCCCTAT	GAC	GGACTAGCAGGGAATCTACT	st23	v57
ST2	V38	ST02V38	TGCCAGCCCTAT	TAC	GGACTATCAGGGAATCTACT	st23	v25
ST2	V39	ST02V39	TGCCAGCCCTAT	AAC	GGACTAACAGGGAATCTACT	st23	v41
ST2	V40	ST02V40	TGCCAGCCCTAT	GCC	GGACTAGCAGGGCATCTACT	st23	v49
ST2	V41	ST02V41	TGCCAGCCCTAT	TCC	GGACTATCAGGGCATCTACT	st23	v17
ST2	V42	ST02V42	TGCCAGCCCTAT	ACC	GGACTAACAGGGCATCTACT	st23	v33
ST2	V43	ST02V43	TGCCAGCCCTAT	GGC	GGACTAGCAGGGGATCTACT	st23	v61
ST2	V44	ST02V44	TGCCAGCCCTAT	TGC	GGACTATCAGGGGATCTACT	st23	v29
ST2	V45	ST02V45	TGCCAGCCCTAT	AGC	GGACTAACAGGGGATCTACT	st23	v45
ST2	V46	ST02V46	TGCCAGCCCTAT	GAG	GGACTAGCAGGGAATCTAGT	st23	v60
ST2	V47	ST02V47	TGCCAGCCCTAT	TAG	GGACTATCAGGGAATCTAGT	st23	v28
ST2	V48	ST02V48	TGCCAGCCCTAT	AAG	GGACTAACAGGGAATCTAGT	st23	v44
ST2	V49	ST02V49	TGCCAGCCCTAT	GCG	GGACTAGCAGGGCATCTAGT	st23	v52
ST2	V50	ST02V50	TGCCAGCCCTAT	TCG	GGACTATCAGGGCATCTAGT	st23	v20
ST2	V51	ST02V51	TGCCAGCCCTAT	ACG	GGACTAACAGGGCATCTAGT	st23	v36
ST2	V52	ST02V52	TGCCAGCCCTAT	GGG	GGACTAGCAGGGGATCTAGT	st23	v64
ST2	V53	ST02V53	TGCCAGCCCTAT	TGG	GGACTATCAGGGGATCTAGT	st23	v32
ST2	V54	ST02V54	TGCCAGCCCTAT	AGG	GGACTAACAGGGGATCTAGT	st23	v48
ST2	V55	ST02V55	TGCCAGCCCTAT	GAT	GGACTAGCAGGGAATCTATT	st23	v58
ST2	V56	ST02V56	TGCCAGCCCTAT	TAT	GGACTATCAGGGAATCTATT	st23	v26
ST2	V57	ST02V57	TGCCAGCCCTAT	AAT	GGACTAACAGGGAATCTATT	st23	v42
ST2	V58	ST02V58	TGCCAGCCCTAT	GCT	GGACTAGCAGGGCATCTATT	st23	v50
ST2	V59	ST02V59	TGCCAGCCCTAT	TCT	GGACTATCAGGGCATCTATT	st23	v18
ST2	V60	ST02V60	TGCCAGCCCTAT	ACT	GGACTAACAGGGCATCTATT	st23	v34
ST2	V61	ST02V61	TGCCAGCCCTAT	GGT	GGACTAGCAGGGGATCTATT	st23	v62
ST2	V62	ST02V62	TGCCAGCCCTAT	TGT	GGACTATCAGGGGATCTATT	st23	v30
ST2	V63	ST02V63	TGCCAGCCCTAT	AGT	GGACTAACAGGGGATCTATT	st23	v46
ST3	V0	ST03V00	ACATCGCTCGTC	CTA	GGACTACCAGGGTATCTAAT	st39	v1
ST3	V1	ST03V01	ACATCGCTCGTC	GTA	GGACTAGCAGGGTATCTAAT	st39	v55
ST3	V2	ST03V02	ACATCGCTCGTC	TTA	GGACTATCAGGGTATCTAAT	st39	v23
ST3	V3	ST03V03	ACATCGCTCGTC	ATA	GGACTAACAGGGTATCTAAT	st39	v39
ST3	V4	ST03V04	ACATCGCTCGTC	CAA	GGACTACCAGGGAATCTAAT	st39	v11
ST3	V5	ST03V05	ACATCGCTCGTC	CCA	GGACTACCAGGGCATCTAAT	st39	v4
ST3	V6	ST03V06	ACATCGCTCGTC	CGA	GGACTACCAGGGGATCTAAT	st39	v15
ST3	V7	ST03V07	ACATCGCTCGTC	CTC	GGACTACCAGGGTATCTACT	st39	v6
ST3	V8	ST03V08	ACATCGCTCGTC	CTG	GGACTACCAGGGTATCTAGT	st39	v8
ST3	V9	ST03V09	ACATCGCTCGTC	CTT	GGACTACCAGGGTATCTATT	st39	v7
ST3	V10	ST03V10	ACATCGCTCGTC	GAA	GGACTAGCAGGGAATCTAAT	st39	v59
ST3	V11	ST03V11	ACATCGCTCGTC	TAA	GGACTATCAGGGAATCTAAT	st39	v27
ST3	V12	ST03V12	ACATCGCTCGTC	AAA	GGACTAACAGGGAATCTAAT	st39	v43
ST3	V13	ST03V13	ACATCGCTCGTC	GCA	GGACTAGCAGGGCATCTAAT	st39	v51
ST3	V14	ST03V14	ACATCGCTCGTC	TCA	GGACTATCAGGGCATCTAAT	st39	v19
ST3	V15	ST03V15	ACATCGCTCGTC	ACA	GGACTAACAGGGCATCTAAT	st39	v35
ST3	V16	ST03V16	ACATCGCTCGTC	GGA	GGACTAGCAGGGGATCTAAT	st39	v63
ST3	V17	ST03V17	ACATCGCTCGTC	TGA	GGACTATCAGGGGATCTAAT	st39	v31
ST3	V18	ST03V18	ACATCGCTCGTC	AGA	GGACTAACAGGGGATCTAAT	st39	v47
ST3	V19	ST03V19	ACATCGCTCGTC	CAC	GGACTACCAGGGAATCTACT	st39	v9
ST3	V20	ST03V20	ACATCGCTCGTC	CCC	GGACTACCAGGGCATCTACT	st39	v2
ST3	V21	ST03V21	ACATCGCTCGTC	CGC	GGACTACCAGGGGATCTACT	st39	v13
ST3	V22	ST03V22	ACATCGCTCGTC	CAG	GGACTACCAGGGAATCTAGT	st39	v12
ST3	V23	ST03V23	ACATCGCTCGTC	CCG	GGACTACCAGGGCATCTAGT	st39	v5
ST3	V24	ST03V24	ACATCGCTCGTC	CGG	GGACTACCAGGGGATCTAGT	st39	v16
ST3	V25	ST03V25	ACATCGCTCGTC	CAT	GGACTACCAGGGAATCTATT	st39	v10
ST3	V26	ST03V26	ACATCGCTCGTC	CCT	GGACTACCAGGGCATCTATT	st39	v3
ST3	V27	ST03V27	ACATCGCTCGTC	CGT	GGACTACCAGGGGATCTATT	st39	v14
ST3	V28	ST03V28	ACATCGCTCGTC	GTC	GGACTAGCAGGGTATCTACT	st39	v53
ST3	V29	ST03V29	ACATCGCTCGTC	TTC	GGACTATCAGGGTATCTACT	st39	v21
ST3	V30	ST03V30	ACATCGCTCGTC	ATC	GGACTAACAGGGTATCTACT	st39	v37
ST3	V31	ST03V31	ACATCGCTCGTC	GTG	GGACTAGCAGGGTATCTAGT	st39	v56
ST3	V32	ST03V32	ACATCGCTCGTC	TTG	GGACTATCAGGGTATCTAGT	st39	v24
ST3	V33	ST03V33	ACATCGCTCGTC	ATG	GGACTAACAGGGTATCTAGT	st39	v40
ST3	V34	ST03V34	ACATCGCTCGTC	GTT	GGACTAGCAGGGTATCTATT	st39	v54
ST3	V35	ST03V35	ACATCGCTCGTC	TTT	GGACTATCAGGGTATCTATT	st39	v22
ST3	V36	ST03V36	ACATCGCTCGTC	ATT	GGACTAACAGGGTATCTATT	st39	v38
ST3	V37	ST03V37	ACATCGCTCGTC	GAC	GGACTAGCAGGGAATCTACT	st39	v57
ST3	V38	ST03V38	ACATCGCTCGTC	TAC	GGACTATCAGGGAATCTACT	st39	v25
ST3	V39	ST03V39	ACATCGCTCGTC	AAC	GGACTAACAGGGAATCTACT	st39	v41
ST3	V40	ST03V40	ACATCGCTCGTC	GCC	GGACTAGCAGGGCATCTACT	st39	v49
ST3	V41	ST03V41	ACATCGCTCGTC	TCC	GGACTATCAGGGCATCTACT	st39	v17
ST3	V42	ST03V42	ACATCGCTCGTC	ACC	GGACTAACAGGGCATCTACT	st39	v33
ST3	V43	ST03V43	ACATCGCTCGTC	GGC	GGACTAGCAGGGGATCTACT	st39	v61
ST3	V44	ST03V44	ACATCGCTCGTC	TGC	GGACTATCAGGGGATCTACT	st39	v29
ST3	V45	ST03V45	ACATCGCTCGTC	AGC	GGACTAACAGGGGATCTACT	st39	v45
ST3	V46	ST03V46	ACATCGCTCGTC	GAG	GGACTAGCAGGGAATCTAGT	st39	v60
ST3	V47	ST03V47	ACATCGCTCGTC	TAG	GGACTATCAGGGAATCTAGT	st39	v28
ST3	V48	ST03V48	ACATCGCTCGTC	AAG	GGACTAACAGGGAATCTAGT	st39	v44
ST3	V49	ST03V49	ACATCGCTCGTC	GCG	GGACTAGCAGGGCATCTAGT	st39	v52
ST3	V50	ST03V50	ACATCGCTCGTC	TCG	GGACTATCAGGGCATCTAGT	st39	v20
ST3	V51	ST03V51	ACATCGCTCGTC	ACG	GGACTAACAGGGCATCTAGT	st39	v36
ST3	V52	ST03V52	ACATCGCTCGTC	GGG	GGACTAGCAGGGGATCTAGT	st39	v64
ST3	V53	ST03V53	ACATCGCTCGTC	TGG	GGACTATCAGGGGATCTAGT	st39	v32
ST3	V54	ST03V54	ACATCGCTCGTC	AGG	GGACTAACAGGGGATCTAGT	st39	v48
ST3	V55	ST03V55	ACATCGCTCGTC	GAT	GGACTAGCAGGGAATCTATT	st39	v58
ST3	V56	ST03V56	ACATCGCTCGTC	TAT	GGACTATCAGGGAATCTATT	st39	v26
ST3	V57	ST03V57	ACATCGCTCGTC	AAT	GGACTAACAGGGAATCTATT	st39	v42
ST3	V58	ST03V58	ACATCGCTCGTC	GCT	GGACTAGCAGGGCATCTATT	st39	v50
ST3	V59	ST03V59	ACATCGCTCGTC	TCT	GGACTATCAGGGCATCTATT	st39	v18
ST3	V60	ST03V60	ACATCGCTCGTC	ACT	GGACTAACAGGGCATCTATT	st39	v34
ST3	V61	ST03V61	ACATCGCTCGTC	GGT	GGACTAGCAGGGGATCTATT	st39	v62
ST3	V62	ST03V62	ACATCGCTCGTC	TGT	GGACTATCAGGGGATCTATT	st39	v30
ST3	V63	ST03V63	ACATCGCTCGTC	AGT	GGACTAACAGGGGATCTATT	st39	v46
ST4	V0	ST04V00	GAACCTTTCCCG	CTA	GGACTACCAGGGTATCTAAT	st11	v1
ST4	V1	ST04V01	GAACCTTTCCCG	GTA	GGACTAGCAGGGTATCTAAT	st11	v55
ST4	V2	ST04V02	GAACCTTTCCCG	TTA	GGACTATCAGGGTATCTAAT	st11	v23
ST4	V3	ST04V03	GAACCTTTCCCG	ATA	GGACTAACAGGGTATCTAAT	st11	v39
ST4	V4	ST04V04	GAACCTTTCCCG	CAA	GGACTACCAGGGAATCTAAT	st11	v11
ST4	V5	ST04V05	GAACCTTTCCCG	CCA	GGACTACCAGGGCATCTAAT	st11	v4
ST4	V6	ST04V06	GAACCTTTCCCG	CGA	GGACTACCAGGGGATCTAAT	st11	v15
ST4	V7	ST04V07	GAACCTTTCCCG	CTC	GGACTACCAGGGTATCTACT	st11	v6
ST4	V8	ST04V08	GAACCTTTCCCG	CTG	GGACTACCAGGGTATCTAGT	st11	v8
ST4	V9	ST04V09	GAACCTTTCCCG	CTT	GGACTACCAGGGTATCTATT	st11	v7
ST4	V10	ST04V10	GAACCTTTCCCG	GAA	GGACTAGCAGGGAATCTAAT	st11	v59
ST4	V11	ST04V11	GAACCTTTCCCG	TAA	GGACTATCAGGGAATCTAAT	st11	v27
ST4	V12	ST04V12	GAACCTTTCCCG	AAA	GGACTAACAGGGAATCTAAT	st11	v43
ST4	V13	ST04V13	GAACCTTTCCCG	GCA	GGACTAGCAGGGCATCTAAT	st11	v51
ST4	V14	ST04V14	GAACCTTTCCCG	TCA	GGACTATCAGGGCATCTAAT	st11	v19
ST4	V15	ST04V15	GAACCTTTCCCG	ACA	GGACTAACAGGGCATCTAAT	st11	v35
ST4	V16	ST04V16	GAACCTTTCCCG	GGA	GGACTAGCAGGGGATCTAAT	st11	v63
ST4	V17	ST04V17	GAACCTTTCCCG	TGA	GGACTATCAGGGGATCTAAT	st11	v31
ST4	V18	ST04V18	GAACCTTTCCCG	AGA	GGACTAACAGGGGATCTAAT	st11	v47
ST4	V19	ST04V19	GAACCTTTCCCG	CAC	GGACTACCAGGGAATCTACT	st11	v9
ST4	V20	ST04V20	GAACCTTTCCCG	CCC	GGACTACCAGGGCATCTACT	st11	v2
ST4	V21	ST04V21	GAACCTTTCCCG	CGC	GGACTACCAGGGGATCTACT	st11	v13
ST4	V22	ST04V22	GAACCTTTCCCG	CAG	GGACTACCAGGGAATCTAGT	st11	v12
ST4	V23	ST04V23	GAACCTTTCCCG	CCG	GGACTACCAGGGCATCTAGT	st11	v5
ST4	V24	ST04V24	GAACCTTTCCCG	CGG	GGACTACCAGGGGATCTAGT	st11	v16
ST4	V25	ST04V25	GAACCTTTCCCG	CAT	GGACTACCAGGGAATCTATT	st11	v10
ST4	V26	ST04V26	GAACCTTTCCCG	CCT	GGACTACCAGGGCATCTATT	st11	v3
ST4	V27	ST04V27	GAACCTTTCCCG	CGT	GGACTACCAGGGGATCTATT	st11	v14
ST4	V28	ST04V28	GAACCTTTCCCG	GTC	GGACTAGCAGGGTATCTACT	st11	v53
ST4	V29	ST04V29	GAACCTTTCCCG	TTC	GGACTATCAGGGTATCTACT	st11	v21
ST4	V30	ST04V30	GAACCTTTCCCG	ATC	GGACTAACAGGGTATCTACT	st11	v37
ST4	V31	ST04V31	GAACCTTTCCCG	GTG	GGACTAGCAGGGTATCTAGT	st11	v56
ST4	V32	ST04V32	GAACCTTTCCCG	TTG	GGACTATCAGGGTATCTAGT	st11	v24
ST4	V33	ST04V33	GAACCTTTCCCG	ATG	GGACTAACAGGGTATCTAGT	st11	v40
ST4	V34	ST04V34	GAACCTTTCCCG	GTT	GGACTAGCAGGGTATCTATT	st11	v54
ST4	V35	ST04V35	GAACCTTTCCCG	TTT	GGACTATCAGGGTATCTATT	st11	v22
ST4	V36	ST04V36	GAACCTTTCCCG	ATT	GGACTAACAGGGTATCTATT	st11	v38
ST4	V37	ST04V37	GAACCTTTCCCG	GAC	GGACTAGCAGGGAATCTACT	st11	v57
ST4	V38	ST04V38	GAACCTTTCCCG	TAC	GGACTATCAGGGAATCTACT	st11	v25
ST4	V39	ST04V39	GAACCTTTCCCG	AAC	GGACTAACAGGGAATCTACT	st11	v41
ST4	V40	ST04V40	GAACCTTTCCCG	GCC	GGACTAGCAGGGCATCTACT	st11	v49
ST4	V41	ST04V41	GAACCTTTCCCG	TCC	GGACTATCAGGGCATCTACT	st11	v17
ST4	V42	ST04V42	GAACCTTTCCCG	ACC	GGACTAACAGGGCATCTACT	st11	v33
ST4	V43	ST04V43	GAACCTTTCCCG	GGC	GGACTAGCAGGGGATCTACT	st11	v61
ST4	V44	ST04V44	GAACCTTTCCCG	TGC	GGACTATCAGGGGATCTACT	st11	v29
ST4	V45	ST04V45	GAACCTTTCCCG	AGC	GGACTAACAGGGGATCTACT	st11	v45
ST4	V46	ST04V46	GAACCTTTCCCG	GAG	GGACTAGCAGGGAATCTAGT	st11	v60
ST4	V47	ST04V47	GAACCTTTCCCG	TAG	GGACTATCAGGGAATCTAGT	st11	v28
ST4	V48	ST04V48	GAACCTTTCCCG	AAG	GGACTAACAGGGAATCTAGT	st11	v44
ST4	V49	ST04V49	GAACCTTTCCCG	GCG	GGACTAGCAGGGCATCTAGT	st11	v52
ST4	V50	ST04V50	GAACCTTTCCCG	TCG	GGACTATCAGGGCATCTAGT	st11	v20
ST4	V51	ST04V51	GAACCTTTCCCG	ACG	GGACTAACAGGGCATCTAGT	st11	v36
ST4	V52	ST04V52	GAACCTTTCCCG	GGG	GGACTAGCAGGGGATCTAGT	st11	v64
ST4	V53	ST04V53	GAACCTTTCCCG	TGG	GGACTATCAGGGGATCTAGT	st11	v32
ST4	V54	ST04V54	GAACCTTTCCCG	AGG	GGACTAACAGGGGATCTAGT	st11	v48
ST4	V55	ST04V55	GAACCTTTCCCG	GAT	GGACTAGCAGGGAATCTATT	st11	v58
ST4	V56	ST04V56	GAACCTTTCCCG	TAT	GGACTATCAGGGAATCTATT	st11	v26
ST4	V57	ST04V57	GAACCTTTCCCG	AAT	GGACTAACAGGGAATCTATT	st11	v42
ST4	V58	ST04V58	GAACCTTTCCCG	GCT	GGACTAGCAGGGCATCTATT	st11	v50
ST4	V59	ST04V59	GAACCTTTCCCG	TCT	GGACTATCAGGGCATCTATT	st11	v18
ST4	V60	ST04V60	GAACCTTTCCCG	ACT	GGACTAACAGGGCATCTATT	st11	v34
ST4	V61	ST04V61	GAACCTTTCCCG	GGT	GGACTAGCAGGGGATCTATT	st11	v62
ST4	V62	ST04V62	GAACCTTTCCCG	TGT	GGACTATCAGGGGATCTATT	st11	v30
ST4	V63	ST04V63	GAACCTTTCCCG	AGT	GGACTAACAGGGGATCTATT	st11	v46
ST5	V0	ST05V00	TGCGCTCCAACT	CTA	GGACTACCAGGGTATCTAAT	st4	v1
ST5	V1	ST05V01	TGCGCTCCAACT	GTA	GGACTAGCAGGGTATCTAAT	st4	v55
ST5	V2	ST05V02	TGCGCTCCAACT	TTA	GGACTATCAGGGTATCTAAT	st4	v23
ST5	V3	ST05V03	TGCGCTCCAACT	ATA	GGACTAACAGGGTATCTAAT	st4	v39
ST5	V4	ST05V04	TGCGCTCCAACT	CAA	GGACTACCAGGGAATCTAAT	st4	v11
ST5	V5	ST05V05	TGCGCTCCAACT	CCA	GGACTACCAGGGCATCTAAT	st4	v4
ST5	V6	ST05V06	TGCGCTCCAACT	CGA	GGACTACCAGGGGATCTAAT	st4	v15
ST5	V7	ST05V07	TGCGCTCCAACT	CTC	GGACTACCAGGGTATCTACT	st4	v6
ST5	V8	ST05V08	TGCGCTCCAACT	CTG	GGACTACCAGGGTATCTAGT	st4	v8
ST5	V9	ST05V09	TGCGCTCCAACT	CTT	GGACTACCAGGGTATCTATT	st4	v7
ST5	V10	ST05V10	TGCGCTCCAACT	GAA	GGACTAGCAGGGAATCTAAT	st4	v59
ST5	V11	ST05V11	TGCGCTCCAACT	TAA	GGACTATCAGGGAATCTAAT	st4	v27
ST5	V12	ST05V12	TGCGCTCCAACT	AAA	GGACTAACAGGGAATCTAAT	st4	v43
ST5	V13	ST05V13	TGCGCTCCAACT	GCA	GGACTAGCAGGGCATCTAAT	st4	v51
ST5	V14	ST05V14	TGCGCTCCAACT	TCA	GGACTATCAGGGCATCTAAT	st4	v19
ST5	V15	ST05V15	TGCGCTCCAACT	ACA	GGACTAACAGGGCATCTAAT	st4	v35
ST5	V16	ST05V16	TGCGCTCCAACT	GGA	GGACTAGCAGGGGATCTAAT	st4	v63
ST5	V17	ST05V17	TGCGCTCCAACT	TGA	GGACTATCAGGGGATCTAAT	st4	v31
ST5	V18	ST05V18	TGCGCTCCAACT	AGA	GGACTAACAGGGGATCTAAT	st4	v47
ST5	V19	ST05V19	TGCGCTCCAACT	CAC	GGACTACCAGGGAATCTACT	st4	v9
ST5	V20	ST05V20	TGCGCTCCAACT	CCC	GGACTACCAGGGCATCTACT	st4	v2
ST5	V21	ST05V21	TGCGCTCCAACT	CGC	GGACTACCAGGGGATCTACT	st4	v13
ST5	V22	ST05V22	TGCGCTCCAACT	CAG	GGACTACCAGGGAATCTAGT	st4	v12
ST5	V23	ST05V23	TGCGCTCCAACT	CCG	GGACTACCAGGGCATCTAGT	st4	v5
ST5	V24	ST05V24	TGCGCTCCAACT	CGG	GGACTACCAGGGGATCTAGT	st4	v16
ST5	V25	ST05V25	TGCGCTCCAACT	CAT	GGACTACCAGGGAATCTATT	st4	v10
ST5	V26	ST05V26	TGCGCTCCAACT	CCT	GGACTACCAGGGCATCTATT	st4	v3
ST5	V27	ST05V27	TGCGCTCCAACT	CGT	GGACTACCAGGGGATCTATT	st4	v14
ST5	V28	ST05V28	TGCGCTCCAACT	GTC	GGACTAGCAGGGTATCTACT	st4	v53
ST5	V29	ST05V29	TGCGCTCCAACT	TTC	GGACTATCAGGGTATCTACT	st4	v21
ST5	V30	ST05V30	TGCGCTCCAACT	ATC	GGACTAACAGGGTATCTACT	st4	v37
ST5	V31	ST05V31	TGCGCTCCAACT	GTG	GGACTAGCAGGGTATCTAGT	st4	v56
ST5	V32	ST05V32	TGCGCTCCAACT	TTG	GGACTATCAGGGTATCTAGT	st4	v24
ST5	V33	ST05V33	TGCGCTCCAACT	ATG	GGACTAACAGGGTATCTAGT	st4	v40
ST5	V34	ST05V34	TGCGCTCCAACT	GTT	GGACTAGCAGGGTATCTATT	st4	v54
ST5	V35	ST05V35	TGCGCTCCAACT	TTT	GGACTATCAGGGTATCTATT	st4	v22
ST5	V36	ST05V36	TGCGCTCCAACT	ATT	GGACTAACAGGGTATCTATT	st4	v38
ST5	V37	ST05V37	TGCGCTCCAACT	GAC	GGACTAGCAGGGAATCTACT	st4	v57
ST5	V38	ST05V38	TGCGCTCCAACT	TAC	GGACTATCAGGGAATCTACT	st4	v25
ST5	V39	ST05V39	TGCGCTCCAACT	AAC	GGACTAACAGGGAATCTACT	st4	v41
ST5	V40	ST05V40	TGCGCTCCAACT	GCC	GGACTAGCAGGGCATCTACT	st4	v49
ST5	V41	ST05V41	TGCGCTCCAACT	TCC	GGACTATCAGGGCATCTACT	st4	v17
ST5	V42	ST05V42	TGCGCTCCAACT	ACC	GGACTAACAGGGCATCTACT	st4	v33
ST5	V43	ST05V43	TGCGCTCCAACT	GGC	GGACTAGCAGGGGATCTACT	st4	v61
ST5	V44	ST05V44	TGCGCTCCAACT	TGC	GGACTATCAGGGGATCTACT	st4	v29
ST5	V45	ST05V45	TGCGCTCCAACT	AGC	GGACTAACAGGGGATCTACT	st4	v45
ST5	V46	ST05V46	TGCGCTCCAACT	GAG	GGACTAGCAGGGAATCTAGT	st4	v60
ST5	V47	ST05V47	TGCGCTCCAACT	TAG	GGACTATCAGGGAATCTAGT	st4	v28
ST5	V48	ST05V48	TGCGCTCCAACT	AAG	GGACTAACAGGGAATCTAGT	st4	v44
ST5	V49	ST05V49	TGCGCTCCAACT	GCG	GGACTAGCAGGGCATCTAGT	st4	v52
ST5	V50	ST05V50	TGCGCTCCAACT	TCG	GGACTATCAGGGCATCTAGT	st4	v20
ST5	V51	ST05V51	TGCGCTCCAACT	ACG	GGACTAACAGGGCATCTAGT	st4	v36
ST5	V52	ST05V52	TGCGCTCCAACT	GGG	GGACTAGCAGGGGATCTAGT	st4	v64
ST5	V53	ST05V53	TGCGCTCCAACT	TGG	GGACTATCAGGGGATCTAGT	st4	v32
ST5	V54	ST05V54	TGCGCTCCAACT	AGG	GGACTAACAGGGGATCTAGT	st4	v48
ST5	V55	ST05V55	TGCGCTCCAACT	GAT	GGACTAGCAGGGAATCTATT	st4	v58
ST5	V56	ST05V56	TGCGCTCCAACT	TAT	GGACTATCAGGGAATCTATT	st4	v26
ST5	V57	ST05V57	TGCGCTCCAACT	AAT	GGACTAACAGGGAATCTATT	st4	v42
ST5	V58	ST05V58	TGCGCTCCAACT	GCT	GGACTAGCAGGGCATCTATT	st4	v50
ST5	V59	ST05V59	TGCGCTCCAACT	TCT	GGACTATCAGGGCATCTATT	st4	v18
ST5	V60	ST05V60	TGCGCTCCAACT	ACT	GGACTAACAGGGCATCTATT	st4	v34
ST5	V61	ST05V61	TGCGCTCCAACT	GGT	GGACTAGCAGGGGATCTATT	st4	v62
ST5	V62	ST05V62	TGCGCTCCAACT	TGT	GGACTATCAGGGGATCTATT	st4	v30
ST5	V63	ST05V63	TGCGCTCCAACT	AGT	GGACTAACAGGGGATCTATT	st4	v46
ST6	V0	ST06V00	GACCCTAGCTTC	CTA	GGACTACCAGGGTATCTAAT	st15	v1
ST6	V1	ST06V01	GACCCTAGCTTC	GTA	GGACTAGCAGGGTATCTAAT	st15	v55
ST6	V2	ST06V02	GACCCTAGCTTC	TTA	GGACTATCAGGGTATCTAAT	st15	v23
ST6	V3	ST06V03	GACCCTAGCTTC	ATA	GGACTAACAGGGTATCTAAT	st15	v39
ST6	V4	ST06V04	GACCCTAGCTTC	CAA	GGACTACCAGGGAATCTAAT	st15	v11
ST6	V5	ST06V05	GACCCTAGCTTC	CCA	GGACTACCAGGGCATCTAAT	st15	v4
ST6	V6	ST06V06	GACCCTAGCTTC	CGA	GGACTACCAGGGGATCTAAT	st15	v15
ST6	V7	ST06V07	GACCCTAGCTTC	CTC	GGACTACCAGGGTATCTACT	st15	v6
ST6	V8	ST06V08	GACCCTAGCTTC	CTG	GGACTACCAGGGTATCTAGT	st15	v8
ST6	V9	ST06V09	GACCCTAGCTTC	CTT	GGACTACCAGGGTATCTATT	st15	v7
ST6	V10	ST06V10	GACCCTAGCTTC	GAA	GGACTAGCAGGGAATCTAAT	st15	v59
ST6	V11	ST06V11	GACCCTAGCTTC	TAA	GGACTATCAGGGAATCTAAT	st15	v27
ST6	V12	ST06V12	GACCCTAGCTTC	AAA	GGACTAACAGGGAATCTAAT	st15	v43
ST6	V13	ST06V13	GACCCTAGCTTC	GCA	GGACTAGCAGGGCATCTAAT	st15	v51
ST6	V14	ST06V14	GACCCTAGCTTC	TCA	GGACTATCAGGGCATCTAAT	st15	v19
ST6	V15	ST06V15	GACCCTAGCTTC	ACA	GGACTAACAGGGCATCTAAT	st15	v35
ST6	V16	ST06V16	GACCCTAGCTTC	GGA	GGACTAGCAGGGGATCTAAT	st15	v63
ST6	V17	ST06V17	GACCCTAGCTTC	TGA	GGACTATCAGGGGATCTAAT	st15	v31
ST6	V18	ST06V18	GACCCTAGCTTC	AGA	GGACTAACAGGGGATCTAAT	st15	v47
ST6	V19	ST06V19	GACCCTAGCTTC	CAC	GGACTACCAGGGAATCTACT	st15	v9
ST6	V20	ST06V20	GACCCTAGCTTC	CCC	GGACTACCAGGGCATCTACT	st15	v2
ST6	V21	ST06V21	GACCCTAGCTTC	CGC	GGACTACCAGGGGATCTACT	st15	v13
ST6	V22	ST06V22	GACCCTAGCTTC	CAG	GGACTACCAGGGAATCTAGT	st15	v12
ST6	V23	ST06V23	GACCCTAGCTTC	CCG	GGACTACCAGGGCATCTAGT	st15	v5
ST6	V24	ST06V24	GACCCTAGCTTC	CGG	GGACTACCAGGGGATCTAGT	st15	v16
ST6	V25	ST06V25	GACCCTAGCTTC	CAT	GGACTACCAGGGAATCTATT	st15	v10
ST6	V26	ST06V26	GACCCTAGCTTC	CCT	GGACTACCAGGGCATCTATT	st15	v3
ST6	V27	ST06V27	GACCCTAGCTTC	CGT	GGACTACCAGGGGATCTATT	st15	v14
ST6	V28	ST06V28	GACCCTAGCTTC	GTC	GGACTAGCAGGGTATCTACT	st15	v53
ST6	V29	ST06V29	GACCCTAGCTTC	TTC	GGACTATCAGGGTATCTACT	st15	v21
ST6	V30	ST06V30	GACCCTAGCTTC	ATC	GGACTAACAGGGTATCTACT	st15	v37
ST6	V31	ST06V31	GACCCTAGCTTC	GTG	GGACTAGCAGGGTATCTAGT	st15	v56
ST6	V32	ST06V32	GACCCTAGCTTC	TTG	GGACTATCAGGGTATCTAGT	st15	v24
ST6	V33	ST06V33	GACCCTAGCTTC	ATG	GGACTAACAGGGTATCTAGT	st15	v40
ST6	V34	ST06V34	GACCCTAGCTTC	GTT	GGACTAGCAGGGTATCTATT	st15	v54
ST6	V35	ST06V35	GACCCTAGCTTC	TTT	GGACTATCAGGGTATCTATT	st15	v22
ST6	V36	ST06V36	GACCCTAGCTTC	ATT	GGACTAACAGGGTATCTATT	st15	v38
ST6	V37	ST06V37	GACCCTAGCTTC	GAC	GGACTAGCAGGGAATCTACT	st15	v57
ST6	V38	ST06V38	GACCCTAGCTTC	TAC	GGACTATCAGGGAATCTACT	st15	v25
ST6	V39	ST06V39	GACCCTAGCTTC	AAC	GGACTAACAGGGAATCTACT	st15	v41
ST6	V40	ST06V40	GACCCTAGCTTC	GCC	GGACTAGCAGGGCATCTACT	st15	v49
ST6	V41	ST06V41	GACCCTAGCTTC	TCC	GGACTATCAGGGCATCTACT	st15	v17
ST6	V42	ST06V42	GACCCTAGCTTC	ACC	GGACTAACAGGGCATCTACT	st15	v33
ST6	V43	ST06V43	GACCCTAGCTTC	GGC	GGACTAGCAGGGGATCTACT	st15	v61
ST6	V44	ST06V44	GACCCTAGCTTC	TGC	GGACTATCAGGGGATCTACT	st15	v29
ST6	V45	ST06V45	GACCCTAGCTTC	AGC	GGACTAACAGGGGATCTACT	st15	v45
ST6	V46	ST06V46	GACCCTAGCTTC	GAG	GGACTAGCAGGGAATCTAGT	st15	v60
ST6	V47	ST06V47	GACCCTAGCTTC	TAG	GGACTATCAGGGAATCTAGT	st15	v28
ST6	V48	ST06V48	GACCCTAGCTTC	AAG	GGACTAACAGGGAATCTAGT	st15	v44
ST6	V49	ST06V49	GACCCTAGCTTC	GCG	GGACTAGCAGGGCATCTAGT	st15	v52
ST6	V50	ST06V50	GACCCTAGCTTC	TCG	GGACTATCAGGGCATCTAGT	st15	v20
ST6	V51	ST06V51	GACCCTAGCTTC	ACG	GGACTAACAGGGCATCTAGT	st15	v36
ST6	V52	ST06V52	GACCCTAGCTTC	GGG	GGACTAGCAGGGGATCTAGT	st15	v64
ST6	V53	ST06V53	GACCCTAGCTTC	TGG	GGACTATCAGGGGATCTAGT	st15	v32
ST6	V54	ST06V54	GACCCTAGCTTC	AGG	GGACTAACAGGGGATCTAGT	st15	v48
ST6	V55	ST06V55	GACCCTAGCTTC	GAT	GGACTAGCAGGGAATCTATT	st15	v58
ST6	V56	ST06V56	GACCCTAGCTTC	TAT	GGACTATCAGGGAATCTATT	st15	v26
ST6	V57	ST06V57	GACCCTAGCTTC	AAT	GGACTAACAGGGAATCTATT	st15	v42
ST6	V58	ST06V58	GACCCTAGCTTC	GCT	GGACTAGCAGGGCATCTATT	st15	v50
ST6	V59	ST06V59	GACCCTAGCTTC	TCT	GGACTATCAGGGCATCTATT	st15	v18
ST6	V60	ST06V60	GACCCTAGCTTC	ACT	GGACTAACAGGGCATCTATT	st15	v34
ST6	V61	ST06V61	GACCCTAGCTTC	GGT	GGACTAGCAGGGGATCTATT	st15	v62
ST6	V62	ST06V62	GACCCTAGCTTC	TGT	GGACTATCAGGGGATCTATT	st15	v30
ST6	V63	ST06V63	GACCCTAGCTTC	AGT	GGACTAACAGGGGATCTATT	st15	v46
ST7	V0	ST07V00	CTTAGCATGCCC	CTA	GGACTACCAGGGTATCTAAT	st6	v1
ST7	V1	ST07V01	CTTAGCATGCCC	GTA	GGACTAGCAGGGTATCTAAT	st6	v55
ST7	V2	ST07V02	CTTAGCATGCCC	TTA	GGACTATCAGGGTATCTAAT	st6	v23
ST7	V3	ST07V03	CTTAGCATGCCC	ATA	GGACTAACAGGGTATCTAAT	st6	v39
ST7	V4	ST07V04	CTTAGCATGCCC	CAA	GGACTACCAGGGAATCTAAT	st6	v11
ST7	V5	ST07V05	CTTAGCATGCCC	CCA	GGACTACCAGGGCATCTAAT	st6	v4
ST7	V6	ST07V06	CTTAGCATGCCC	CGA	GGACTACCAGGGGATCTAAT	st6	v15
ST7	V7	ST07V07	CTTAGCATGCCC	CTC	GGACTACCAGGGTATCTACT	st6	v6
ST7	V8	ST07V08	CTTAGCATGCCC	CTG	GGACTACCAGGGTATCTAGT	st6	v8
ST7	V9	ST07V09	CTTAGCATGCCC	CTT	GGACTACCAGGGTATCTATT	st6	v7
ST7	V10	ST07V10	CTTAGCATGCCC	GAA	GGACTAGCAGGGAATCTAAT	st6	v59
ST7	V11	ST07V11	CTTAGCATGCCC	TAA	GGACTATCAGGGAATCTAAT	st6	v27
ST7	V12	ST07V12	CTTAGCATGCCC	AAA	GGACTAACAGGGAATCTAAT	st6	v43
ST7	V13	ST07V13	CTTAGCATGCCC	GCA	GGACTAGCAGGGCATCTAAT	st6	v51
ST7	V14	ST07V14	CTTAGCATGCCC	TCA	GGACTATCAGGGCATCTAAT	st6	v19
ST7	V15	ST07V15	CTTAGCATGCCC	ACA	GGACTAACAGGGCATCTAAT	st6	v35
ST7	V16	ST07V16	CTTAGCATGCCC	GGA	GGACTAGCAGGGGATCTAAT	st6	v63
ST7	V17	ST07V17	CTTAGCATGCCC	TGA	GGACTATCAGGGGATCTAAT	st6	v31
ST7	V18	ST07V18	CTTAGCATGCCC	AGA	GGACTAACAGGGGATCTAAT	st6	v47
ST7	V19	ST07V19	CTTAGCATGCCC	CAC	GGACTACCAGGGAATCTACT	st6	v9
ST7	V20	ST07V20	CTTAGCATGCCC	CCC	GGACTACCAGGGCATCTACT	st6	v2
ST7	V21	ST07V21	CTTAGCATGCCC	CGC	GGACTACCAGGGGATCTACT	st6	v13
ST7	V22	ST07V22	CTTAGCATGCCC	CAG	GGACTACCAGGGAATCTAGT	st6	v12
ST7	V23	ST07V23	CTTAGCATGCCC	CCG	GGACTACCAGGGCATCTAGT	st6	v5
ST7	V24	ST07V24	CTTAGCATGCCC	CGG	GGACTACCAGGGGATCTAGT	st6	v16
ST7	V25	ST07V25	CTTAGCATGCCC	CAT	GGACTACCAGGGAATCTATT	st6	v10
ST7	V26	ST07V26	CTTAGCATGCCC	CCT	GGACTACCAGGGCATCTATT	st6	v3
ST7	V27	ST07V27	CTTAGCATGCCC	CGT	GGACTACCAGGGGATCTATT	st6	v14
ST7	V28	ST07V28	CTTAGCATGCCC	GTC	GGACTAGCAGGGTATCTACT	st6	v53
ST7	V29	ST07V29	CTTAGCATGCCC	TTC	GGACTATCAGGGTATCTACT	st6	v21
ST7	V30	ST07V30	CTTAGCATGCCC	ATC	GGACTAACAGGGTATCTACT	st6	v37
ST7	V31	ST07V31	CTTAGCATGCCC	GTG	GGACTAGCAGGGTATCTAGT	st6	v56
ST7	V32	ST07V32	CTTAGCATGCCC	TTG	GGACTATCAGGGTATCTAGT	st6	v24
ST7	V33	ST07V33	CTTAGCATGCCC	ATG	GGACTAACAGGGTATCTAGT	st6	v40
ST7	V34	ST07V34	CTTAGCATGCCC	GTT	GGACTAGCAGGGTATCTATT	st6	v54
ST7	V35	ST07V35	CTTAGCATGCCC	TTT	GGACTATCAGGGTATCTATT	st6	v22
ST7	V36	ST07V36	CTTAGCATGCCC	ATT	GGACTAACAGGGTATCTATT	st6	v38
ST7	V37	ST07V37	CTTAGCATGCCC	GAC	GGACTAGCAGGGAATCTACT	st6	v57
ST7	V38	ST07V38	CTTAGCATGCCC	TAC	GGACTATCAGGGAATCTACT	st6	v25
ST7	V39	ST07V39	CTTAGCATGCCC	AAC	GGACTAACAGGGAATCTACT	st6	v41
ST7	V40	ST07V40	CTTAGCATGCCC	GCC	GGACTAGCAGGGCATCTACT	st6	v49
ST7	V41	ST07V41	CTTAGCATGCCC	TCC	GGACTATCAGGGCATCTACT	st6	v17
ST7	V42	ST07V42	CTTAGCATGCCC	ACC	GGACTAACAGGGCATCTACT	st6	v33
ST7	V43	ST07V43	CTTAGCATGCCC	GGC	GGACTAGCAGGGGATCTACT	st6	v61
ST7	V44	ST07V44	CTTAGCATGCCC	TGC	GGACTATCAGGGGATCTACT	st6	v29
ST7	V45	ST07V45	CTTAGCATGCCC	AGC	GGACTAACAGGGGATCTACT	st6	v45
ST7	V46	ST07V46	CTTAGCATGCCC	GAG	GGACTAGCAGGGAATCTAGT	st6	v60
ST7	V47	ST07V47	CTTAGCATGCCC	TAG	GGACTATCAGGGAATCTAGT	st6	v28
ST7	V48	ST07V48	CTTAGCATGCCC	AAG	GGACTAACAGGGAATCTAGT	st6	v44
ST7	V49	ST07V49	CTTAGCATGCCC	GCG	GGACTAGCAGGGCATCTAGT	st6	v52
ST7	V50	ST07V50	CTTAGCATGCCC	TCG	GGACTATCAGGGCATCTAGT	st6	v20
ST7	V51	ST07V51	CTTAGCATGCCC	ACG	GGACTAACAGGGCATCTAGT	st6	v36
ST7	V52	ST07V52	CTTAGCATGCCC	GGG	GGACTAGCAGGGGATCTAGT	st6	v64
ST7	V53	ST07V53	CTTAGCATGCCC	TGG	GGACTATCAGGGGATCTAGT	st6	v32
ST7	V54	ST07V54	CTTAGCATGCCC	AGG	GGACTAACAGGGGATCTAGT	st6	v48
ST7	V55	ST07V55	CTTAGCATGCCC	GAT	GGACTAGCAGGGAATCTATT	st6	v58
ST7	V56	ST07V56	CTTAGCATGCCC	TAT	GGACTATCAGGGAATCTATT	st6	v26
ST7	V57	ST07V57	CTTAGCATGCCC	AAT	GGACTAACAGGGAATCTATT	st6	v42
ST7	V58	ST07V58	CTTAGCATGCCC	GCT	GGACTAGCAGGGCATCTATT	st6	v50
ST7	V59	ST07V59	CTTAGCATGCCC	TCT	GGACTATCAGGGCATCTATT	st6	v18
ST7	V60	ST07V60	CTTAGCATGCCC	ACT	GGACTAACAGGGCATCTATT	st6	v34
ST7	V61	ST07V61	CTTAGCATGCCC	GGT	GGACTAGCAGGGGATCTATT	st6	v62
ST7	V62	ST07V62	CTTAGCATGCCC	TGT	GGACTATCAGGGGATCTATT	st6	v30
ST7	V63	ST07V63	CTTAGCATGCCC	AGT	GGACTAACAGGGGATCTATT	st6	v46
ST8	V0	ST08V00	TCTACCGATGCC	CTA	GGACTACCAGGGTATCTAAT	st8	v1
ST8	V1	ST08V01	TCTACCGATGCC	GTA	GGACTAGCAGGGTATCTAAT	st8	v55
ST8	V2	ST08V02	TCTACCGATGCC	TTA	GGACTATCAGGGTATCTAAT	st8	v23
ST8	V3	ST08V03	TCTACCGATGCC	ATA	GGACTAACAGGGTATCTAAT	st8	v39
ST8	V4	ST08V04	TCTACCGATGCC	CAA	GGACTACCAGGGAATCTAAT	st8	v11
ST8	V5	ST08V05	TCTACCGATGCC	CCA	GGACTACCAGGGCATCTAAT	st8	v4
ST8	V6	ST08V06	TCTACCGATGCC	CGA	GGACTACCAGGGGATCTAAT	st8	v15
ST8	V7	ST08V07	TCTACCGATGCC	CTC	GGACTACCAGGGTATCTACT	st8	v6
ST8	V8	ST08V08	TCTACCGATGCC	CTG	GGACTACCAGGGTATCTAGT	st8	v8
ST8	V9	ST08V09	TCTACCGATGCC	CTT	GGACTACCAGGGTATCTATT	st8	v7
ST8	V10	ST08V10	TCTACCGATGCC	GAA	GGACTAGCAGGGAATCTAAT	st8	v59
ST8	V11	ST08V11	TCTACCGATGCC	TAA	GGACTATCAGGGAATCTAAT	st8	v27
ST8	V12	ST08V12	TCTACCGATGCC	AAA	GGACTAACAGGGAATCTAAT	st8	v43
ST8	V13	ST08V13	TCTACCGATGCC	GCA	GGACTAGCAGGGCATCTAAT	st8	v51
ST8	V14	ST08V14	TCTACCGATGCC	TCA	GGACTATCAGGGCATCTAAT	st8	v19
ST8	V15	ST08V15	TCTACCGATGCC	ACA	GGACTAACAGGGCATCTAAT	st8	v35
ST8	V16	ST08V16	TCTACCGATGCC	GGA	GGACTAGCAGGGGATCTAAT	st8	v63
ST8	V17	ST08V17	TCTACCGATGCC	TGA	GGACTATCAGGGGATCTAAT	st8	v31
ST8	V18	ST08V18	TCTACCGATGCC	AGA	GGACTAACAGGGGATCTAAT	st8	v47
ST8	V19	ST08V19	TCTACCGATGCC	CAC	GGACTACCAGGGAATCTACT	st8	v9
ST8	V20	ST08V20	TCTACCGATGCC	CCC	GGACTACCAGGGCATCTACT	st8	v2
ST8	V21	ST08V21	TCTACCGATGCC	CGC	GGACTACCAGGGGATCTACT	st8	v13
ST8	V22	ST08V22	TCTACCGATGCC	CAG	GGACTACCAGGGAATCTAGT	st8	v12
ST8	V23	ST08V23	TCTACCGATGCC	CCG	GGACTACCAGGGCATCTAGT	st8	v5
ST8	V24	ST08V24	TCTACCGATGCC	CGG	GGACTACCAGGGGATCTAGT	st8	v16
ST8	V25	ST08V25	TCTACCGATGCC	CAT	GGACTACCAGGGAATCTATT	st8	v10
ST8	V26	ST08V26	TCTACCGATGCC	CCT	GGACTACCAGGGCATCTATT	st8	v3
ST8	V27	ST08V27	TCTACCGATGCC	CGT	GGACTACCAGGGGATCTATT	st8	v14
ST8	V28	ST08V28	TCTACCGATGCC	GTC	GGACTAGCAGGGTATCTACT	st8	v53
ST8	V29	ST08V29	TCTACCGATGCC	TTC	GGACTATCAGGGTATCTACT	st8	v21
ST8	V30	ST08V30	TCTACCGATGCC	ATC	GGACTAACAGGGTATCTACT	st8	v37
ST8	V31	ST08V31	TCTACCGATGCC	GTG	GGACTAGCAGGGTATCTAGT	st8	v56
ST8	V32	ST08V32	TCTACCGATGCC	TTG	GGACTATCAGGGTATCTAGT	st8	v24
ST8	V33	ST08V33	TCTACCGATGCC	ATG	GGACTAACAGGGTATCTAGT	st8	v40
ST8	V34	ST08V34	TCTACCGATGCC	GTT	GGACTAGCAGGGTATCTATT	st8	v54
ST8	V35	ST08V35	TCTACCGATGCC	TTT	GGACTATCAGGGTATCTATT	st8	v22
ST8	V36	ST08V36	TCTACCGATGCC	ATT	GGACTAACAGGGTATCTATT	st8	v38
ST8	V37	ST08V37	TCTACCGATGCC	GAC	GGACTAGCAGGGAATCTACT	st8	v57
ST8	V38	ST08V38	TCTACCGATGCC	TAC	GGACTATCAGGGAATCTACT	st8	v25
ST8	V39	ST08V39	TCTACCGATGCC	AAC	GGACTAACAGGGAATCTACT	st8	v41
ST8	V40	ST08V40	TCTACCGATGCC	GCC	GGACTAGCAGGGCATCTACT	st8	v49
ST8	V41	ST08V41	TCTACCGATGCC	TCC	GGACTATCAGGGCATCTACT	st8	v17
ST8	V42	ST08V42	TCTACCGATGCC	ACC	GGACTAACAGGGCATCTACT	st8	v33
ST8	V43	ST08V43	TCTACCGATGCC	GGC	GGACTAGCAGGGGATCTACT	st8	v61
ST8	V44	ST08V44	TCTACCGATGCC	TGC	GGACTATCAGGGGATCTACT	st8	v29
ST8	V45	ST08V45	TCTACCGATGCC	AGC	GGACTAACAGGGGATCTACT	st8	v45
ST8	V46	ST08V46	TCTACCGATGCC	GAG	GGACTAGCAGGGAATCTAGT	st8	v60
ST8	V47	ST08V47	TCTACCGATGCC	TAG	GGACTATCAGGGAATCTAGT	st8	v28
ST8	V48	ST08V48	TCTACCGATGCC	AAG	GGACTAACAGGGAATCTAGT	st8	v44
ST8	V49	ST08V49	TCTACCGATGCC	GCG	GGACTAGCAGGGCATCTAGT	st8	v52
ST8	V50	ST08V50	TCTACCGATGCC	TCG	GGACTATCAGGGCATCTAGT	st8	v20
ST8	V51	ST08V51	TCTACCGATGCC	ACG	GGACTAACAGGGCATCTAGT	st8	v36
ST8	V52	ST08V52	TCTACCGATGCC	GGG	GGACTAGCAGGGGATCTAGT	st8	v64
ST8	V53	ST08V53	TCTACCGATGCC	TGG	GGACTATCAGGGGATCTAGT	st8	v32
ST8	V54	ST08V54	TCTACCGATGCC	AGG	GGACTAACAGGGGATCTAGT	st8	v48
ST8	V55	ST08V55	TCTACCGATGCC	GAT	GGACTAGCAGGGAATCTATT	st8	v58
ST8	V56	ST08V56	TCTACCGATGCC	TAT	GGACTATCAGGGAATCTATT	st8	v26
ST8	V57	ST08V57	TCTACCGATGCC	AAT	GGACTAACAGGGAATCTATT	st8	v42
ST8	V58	ST08V58	TCTACCGATGCC	GCT	GGACTAGCAGGGCATCTATT	st8	v50
ST8	V59	ST08V59	TCTACCGATGCC	TCT	GGACTATCAGGGCATCTATT	st8	v18
ST8	V60	ST08V60	TCTACCGATGCC	ACT	GGACTAACAGGGCATCTATT	st8	v34
ST8	V61	ST08V61	TCTACCGATGCC	GGT	GGACTAGCAGGGGATCTATT	st8	v62
ST8	V62	ST08V62	TCTACCGATGCC	TGT	GGACTATCAGGGGATCTATT	st8	v30
ST8	V63	ST08V63	TCTACCGATGCC	AGT	GGACTAACAGGGGATCTATT	st8	v46
ST9	V0	ST09V00	CGTCCATCTACG	CTA	GGACTACCAGGGTATCTAAT	st7	v1
ST9	V1	ST09V01	CGTCCATCTACG	GTA	GGACTAGCAGGGTATCTAAT	st7	v55
ST9	V2	ST09V02	CGTCCATCTACG	TTA	GGACTATCAGGGTATCTAAT	st7	v23
ST9	V3	ST09V03	CGTCCATCTACG	ATA	GGACTAACAGGGTATCTAAT	st7	v39
ST9	V4	ST09V04	CGTCCATCTACG	CAA	GGACTACCAGGGAATCTAAT	st7	v11
ST9	V5	ST09V05	CGTCCATCTACG	CCA	GGACTACCAGGGCATCTAAT	st7	v4
ST9	V6	ST09V06	CGTCCATCTACG	CGA	GGACTACCAGGGGATCTAAT	st7	v15
ST9	V7	ST09V07	CGTCCATCTACG	CTC	GGACTACCAGGGTATCTACT	st7	v6
ST9	V8	ST09V08	CGTCCATCTACG	CTG	GGACTACCAGGGTATCTAGT	st7	v8
ST9	V9	ST09V09	CGTCCATCTACG	CTT	GGACTACCAGGGTATCTATT	st7	v7
ST9	V10	ST09V10	CGTCCATCTACG	GAA	GGACTAGCAGGGAATCTAAT	st7	v59
ST9	V11	ST09V11	CGTCCATCTACG	TAA	GGACTATCAGGGAATCTAAT	st7	v27
ST9	V12	ST09V12	CGTCCATCTACG	AAA	GGACTAACAGGGAATCTAAT	st7	v43
ST9	V13	ST09V13	CGTCCATCTACG	GCA	GGACTAGCAGGGCATCTAAT	st7	v51
ST9	V14	ST09V14	CGTCCATCTACG	TCA	GGACTATCAGGGCATCTAAT	st7	v19
ST9	V15	ST09V15	CGTCCATCTACG	ACA	GGACTAACAGGGCATCTAAT	st7	v35
ST9	V16	ST09V16	CGTCCATCTACG	GGA	GGACTAGCAGGGGATCTAAT	st7	v63
ST9	V17	ST09V17	CGTCCATCTACG	TGA	GGACTATCAGGGGATCTAAT	st7	v31
ST9	V18	ST09V18	CGTCCATCTACG	AGA	GGACTAACAGGGGATCTAAT	st7	v47
ST9	V19	ST09V19	CGTCCATCTACG	CAC	GGACTACCAGGGAATCTACT	st7	v9
ST9	V20	ST09V20	CGTCCATCTACG	CCC	GGACTACCAGGGCATCTACT	st7	v2
ST9	V21	ST09V21	CGTCCATCTACG	CGC	GGACTACCAGGGGATCTACT	st7	v13
ST9	V22	ST09V22	CGTCCATCTACG	CAG	GGACTACCAGGGAATCTAGT	st7	v12
ST9	V23	ST09V23	CGTCCATCTACG	CCG	GGACTACCAGGGCATCTAGT	st7	v5
ST9	V24	ST09V24	CGTCCATCTACG	CGG	GGACTACCAGGGGATCTAGT	st7	v16
ST9	V25	ST09V25	CGTCCATCTACG	CAT	GGACTACCAGGGAATCTATT	st7	v10
ST9	V26	ST09V26	CGTCCATCTACG	CCT	GGACTACCAGGGCATCTATT	st7	v3
ST9	V27	ST09V27	CGTCCATCTACG	CGT	GGACTACCAGGGGATCTATT	st7	v14
ST9	V28	ST09V28	CGTCCATCTACG	GTC	GGACTAGCAGGGTATCTACT	st7	v53
ST9	V29	ST09V29	CGTCCATCTACG	TTC	GGACTATCAGGGTATCTACT	st7	v21
ST9	V30	ST09V30	CGTCCATCTACG	ATC	GGACTAACAGGGTATCTACT	st7	v37
ST9	V31	ST09V31	CGTCCATCTACG	GTG	GGACTAGCAGGGTATCTAGT	st7	v56
ST9	V32	ST09V32	CGTCCATCTACG	TTG	GGACTATCAGGGTATCTAGT	st7	v24
ST9	V33	ST09V33	CGTCCATCTACG	ATG	GGACTAACAGGGTATCTAGT	st7	v40
ST9	V34	ST09V34	CGTCCATCTACG	GTT	GGACTAGCAGGGTATCTATT	st7	v54
ST9	V35	ST09V35	CGTCCATCTACG	TTT	GGACTATCAGGGTATCTATT	st7	v22
ST9	V36	ST09V36	CGTCCATCTACG	ATT	GGACTAACAGGGTATCTATT	st7	v38
ST9	V37	ST09V37	CGTCCATCTACG	GAC	GGACTAGCAGGGAATCTACT	st7	v57
ST9	V38	ST09V38	CGTCCATCTACG	TAC	GGACTATCAGGGAATCTACT	st7	v25
ST9	V39	ST09V39	CGTCCATCTACG	AAC	GGACTAACAGGGAATCTACT	st7	v41
ST9	V40	ST09V40	CGTCCATCTACG	GCC	GGACTAGCAGGGCATCTACT	st7	v49
ST9	V41	ST09V41	CGTCCATCTACG	TCC	GGACTATCAGGGCATCTACT	st7	v17
ST9	V42	ST09V42	CGTCCATCTACG	ACC	GGACTAACAGGGCATCTACT	st7	v33
ST9	V43	ST09V43	CGTCCATCTACG	GGC	GGACTAGCAGGGGATCTACT	st7	v61
ST9	V44	ST09V44	CGTCCATCTACG	TGC	GGACTATCAGGGGATCTACT	st7	v29
ST9	V45	ST09V45	CGTCCATCTACG	AGC	GGACTAACAGGGGATCTACT	st7	v45
ST9	V46	ST09V46	CGTCCATCTACG	GAG	GGACTAGCAGGGAATCTAGT	st7	v60
ST9	V47	ST09V47	CGTCCATCTACG	TAG	GGACTATCAGGGAATCTAGT	st7	v28
ST9	V48	ST09V48	CGTCCATCTACG	AAG	GGACTAACAGGGAATCTAGT	st7	v44
ST9	V49	ST09V49	CGTCCATCTACG	GCG	GGACTAGCAGGGCATCTAGT	st7	v52
ST9	V50	ST09V50	CGTCCATCTACG	TCG	GGACTATCAGGGCATCTAGT	st7	v20
ST9	V51	ST09V51	CGTCCATCTACG	ACG	GGACTAACAGGGCATCTAGT	st7	v36
ST9	V52	ST09V52	CGTCCATCTACG	GGG	GGACTAGCAGGGGATCTAGT	st7	v64
ST9	V53	ST09V53	CGTCCATCTACG	TGG	GGACTATCAGGGGATCTAGT	st7	v32
ST9	V54	ST09V54	CGTCCATCTACG	AGG	GGACTAACAGGGGATCTAGT	st7	v48
ST9	V55	ST09V55	CGTCCATCTACG	GAT	GGACTAGCAGGGAATCTATT	st7	v58
ST9	V56	ST09V56	CGTCCATCTACG	TAT	GGACTATCAGGGAATCTATT	st7	v26
ST9	V57	ST09V57	CGTCCATCTACG	AAT	GGACTAACAGGGAATCTATT	st7	v42
ST9	V58	ST09V58	CGTCCATCTACG	GCT	GGACTAGCAGGGCATCTATT	st7	v50
ST9	V59	ST09V59	CGTCCATCTACG	TCT	GGACTATCAGGGCATCTATT	st7	v18
ST9	V60	ST09V60	CGTCCATCTACG	ACT	GGACTAACAGGGCATCTATT	st7	v34
ST9	V61	ST09V61	CGTCCATCTACG	GGT	GGACTAGCAGGGGATCTATT	st7	v62
ST9	V62	ST09V62	CGTCCATCTACG	TGT	GGACTATCAGGGGATCTATT	st7	v30
ST9	V63	ST09V63	CGTCCATCTACG	AGT	GGACTAACAGGGGATCTATT	st7	v46
