# Supplementary material for: Quantitating primer-template interactions using deconstructed PCR
Source: PeerJ. 2024 Aug 8;12:e17787. doi: 10.7717/peerj.17787 (PMC11317036; doi:10.7717/peerj.17787)
Supplement: Table S4 — Data were rarefied to 7,000 sequences per sample, and each experimental condition has 7–8 replicates. A total of 640 possible interactions are listed (10 templates × 64 primers), and numbers represent the numbers of reads matching each of the combinations. For each row of the BIOM, the number of mismatches between primer and template are shown, along with the position of mismatch, the mismatch sequence pairing, and the theoretical melting temperature of the primer. Reactions conducted with DePCR are highlighted in blue; no highlighting is used for TAS amplification reactions. [file peerj-12-17787-s006.xlsx]

## Sheet: Table S4. Rarefied BIOM
							Template / Primer Mismatches
							F/3'	-14	-8	-2
	Template	template recognition sequence	Template PrimerSite (5'-3')	Template PrimerSite (3'-5')	Primer	Primer Seq (5'-3')	#MM	5' MM	Mid MM	3'MM	Primer Tm		Sample	A1-45-1	A1-45-2	A1-45-3	A1-45-4	A1-45-5	A1-45-6	A1-45-7	A1-45-8	A1-55-1	A1-55-2	A1-55-3	A1-55-4	A1-55-5	A1-55-6	A1-55-7	A1-55-8	A2-45-1	A2-45-2	A2-45-3	A2-45-4	A2-45-5	A2-45-6	A2-45-7	A2-45-8	A2-55-1	A2-55-2	A2-55-3	A2-55-4	A2-55-5	A2-55-6	A2-55-7	A2-55-8	A3-45-1	A3-45-2	A3-45-3	A3-45-4
1	ST_1	CGATCTCTACGC	GGACTACCAGGGTATCTAAT	CCTGATGGTCCCATAGATTA	806F_v1	GGACTACCAGGGTATCTAAT	0				57.4		806Syn_1_ST_1	6729	6736	6716	6737	6668	6741	6736	6725	6688	6700	6699	6720	6664	6693	6692	6748	1449	1376	1423	1424	1512	1401	1469	1416	1577	1584	1493	1636	1568	1611	1511	1542	99	99	84	92
2	ST_1	CGATCTCTACGC	GGACTACCAGGGTATCTAAT	CCTGATGGTCCCATAGATTA	806F_v4	GGACTACCAGGGCATCTAAT	1		A/C		60.6		806Syn_4_ST_1	11	7	12	8	11	7	6	8	7	7	8	10	9	13	11	11	455	492	480	439	467	450	482	459	394	418	363	411	380	370	394	388	288	332	316	333
3	ST_1	CGATCTCTACGC	GGACTACCAGGGTATCTAAT	CCTGATGGTCCCATAGATTA	806F_v6	GGACTACCAGGGTATCTACT	1			T/C	59.1		806Syn_6_ST_1	23	31	22	28	35	26	38	27	36	34	28	34	44	36	31	33	501	539	490	499	511	532	484	519	471	432	452	482	433	417	441	504	578	596	609	591
4	ST_1	CGATCTCTACGC	GGACTACCAGGGTATCTAAT	CCTGATGGTCCCATAGATTA	806F_v7	GGACTACCAGGGTATCTATT	1			T/T	57.4		806Syn_7_ST_1	26	34	38	28	31	25	34	24	28	24	21	19	25	24	18	17	465	460	455	415	473	499	438	470	313	336	320	323	279	248	314	273	672	719	679	593
5	ST_1	CGATCTCTACGC	GGACTACCAGGGTATCTAAT	CCTGATGGTCCCATAGATTA	806F_v8	GGACTACCAGGGTATCTAGT	1			T/G	59.1		806Syn_8_ST_1	9	11	11	10	15	5	7	5	11	8	10	13	13	9	16	8	229	243	238	213	214	200	239	240	282	257	262	248	260	254	254	263	332	301	304	297
6	ST_1	CGATCTCTACGC	GGACTACCAGGGTATCTAAT	CCTGATGGTCCCATAGATTA	806F_v11	GGACTACCAGGGAATCTAAT	1		A/A		58		806Syn_11_ST_1	15	25	22	26	30	23	23	24	35	28	31	26	31	32	35	27	487	476	474	501	465	472	483	484	475	448	462	447	476	425	450	426	698	712	635	674
7	ST_1	CGATCTCTACGC	GGACTACCAGGGTATCTAAT	CCTGATGGTCCCATAGATTA	806F_v15	GGACTACCAGGGGATCTAAT	1		A/G		59.8		806Syn_15_ST_1	48	38	42	46	63	41	30	43	60	46	52	52	59	54	55	40	857	921	927	959	898	869	904	910	1054	1075	1139	1058	1127	1111	1139	1115	1320	1233	1278	1340
8	ST_1	CGATCTCTACGC	GGACTACCAGGGTATCTAAT	CCTGATGGTCCCATAGATTA	806F_v23	GGACTATCAGGGTATCTAAT	1	G/T			55.2		806Syn_23_ST_1	17	9	13	13	18	23	15	21	14	20	5	6	10	6	11	7	617	621	619	598	578	635	621	633	521	536	557	565	506	519	563	518	804	833	856	839
9	ST_1	CGATCTCTACGC	GGACTACCAGGGTATCTAAT	CCTGATGGTCCCATAGATTA	806F_v39	GGACTAACAGGGTATCTAAT	1	G/A			55.7		806Syn_39_ST_1	56	49	49	46	49	54	44	62	54	52	67	55	54	56	64	46	971	969	977	986	940	1006	941	916	952	956	997	912	932	1036	949	922	1154	1067	1163	1107
10	ST_1	CGATCTCTACGC	GGACTACCAGGGTATCTAAT	CCTGATGGTCCCATAGATTA	806F_v55	GGACTAGCAGGGTATCTAAT	1	G/G			57.8		806Syn_55_ST_1	50	43	48	39	46	36	47	39	48	45	49	45	62	40	46	44	781	729	742	792	777	772	796	806	796	810	831	779	868	853	833	896	866	903	891	940
11	ST_1	CGATCTCTACGC	GGACTACCAGGGTATCTAAT	CCTGATGGTCCCATAGATTA	806F_v2	GGACTACCAGGGCATCTACT	2		A/C	T/C	62.3		806Syn_2_ST_1	0	0	0	0	0	0	0	0	0	0	0	0	1	0	0	1	3	2	3	2	4	2	2	2	3	3	0	0	0	3	3	0	0	4	3	3
12	ST_1	CGATCTCTACGC	GGACTACCAGGGTATCTAAT	CCTGATGGTCCCATAGATTA	806F_v3	GGACTACCAGGGCATCTATT	2		A/C	T/T	60.6		806Syn_3_ST_1	0	0	0	0	0	0	0	0	0	0	0	0	0	0	0	0	5	5	1	2	0	0	1	1	1	1	2	0	2	2	0	1	2	1	1	1
13	ST_1	CGATCTCTACGC	GGACTACCAGGGTATCTAAT	CCTGATGGTCCCATAGATTA	806F_v5	GGACTACCAGGGCATCTAGT	2		A/C	T/G	62.3		806Syn_5_ST_1	0	0	0	0	0	0	0	0	0	0	0	0	0	0	0	0	1	2	0	2	2	1	1	0	3	1	2	0	0	2	1	1	2	1	1	0
14	ST_1	CGATCTCTACGC	GGACTACCAGGGTATCTAAT	CCTGATGGTCCCATAGATTA	806F_v9	GGACTACCAGGGAATCTACT	2		A/A	T/C	59.7		806Syn_9_ST_1	0	0	0	0	0	0	0	0	0	1	0	0	2	1	1	0	2	8	1	5	4	4	4	6	6	8	2	0	7	5	2	4	2	13	4	3
15	ST_1	CGATCTCTACGC	GGACTACCAGGGTATCTAAT	CCTGATGGTCCCATAGATTA	806F_v10	GGACTACCAGGGAATCTATT	2		A/A	T/T	58		806Syn_10_ST_1	0	0	0	0	0	1	0	1	0	1	1	0	0	0	0	0	3	3	6	2	4	4	3	3	6	2	0	6	4	3	3	4	4	5	5	2
16	ST_1	CGATCTCTACGC	GGACTACCAGGGTATCTAAT	CCTGATGGTCCCATAGATTA	806F_v12	GGACTACCAGGGAATCTAGT	2		A/A	T/G	59.7		806Syn_12_ST_1	0	0	0	0	0	0	0	2	0	0	1	0	0	0	1	0	2	2	1	1	0	0	1	1	2	4	0	3	3	1	3	1	2	1	2	3
17	ST_1	CGATCTCTACGC	GGACTACCAGGGTATCTAAT	CCTGATGGTCCCATAGATTA	806F_v13	GGACTACCAGGGGATCTACT	2		A/G	T/C	61.5		806Syn_13_ST_1	2	2	5	2	5	4	3	3	2	4	1	0	2	1	1	2	9	12	9	8	9	5	12	10	8	9	4	7	16	9	12	14	13	15	16	13
18	ST_1	CGATCTCTACGC	GGACTACCAGGGTATCTAAT	CCTGATGGTCCCATAGATTA	806F_v14	GGACTACCAGGGGATCTATT	2		A/G	T/T	59.8		806Syn_14_ST_1	1	2	0	0	2	0	0	0	1	3	1	0	0	1	1	1	18	10	12	7	9	5	3	7	8	5	3	8	4	4	7	8	14	9	13	11
19	ST_1	CGATCTCTACGC	GGACTACCAGGGTATCTAAT	CCTGATGGTCCCATAGATTA	806F_v16	GGACTACCAGGGGATCTAGT	2		A/G	T/G	61.5		806Syn_16_ST_1	2	1	0	0	2	2	1	0	0	2	2	0	2	0	1	1	3	5	5	6	7	5	4	4	4	5	5	6	6	5	6	5	5	6	6	3
20	ST_1	CGATCTCTACGC	GGACTACCAGGGTATCTAAT	CCTGATGGTCCCATAGATTA	806F_v19	GGACTATCAGGGCATCTAAT	2	G/T	A/C		58.4		806Syn_19_ST_1	0	0	0	0	0	0	0	0	0	0	0	0	0	0	0	0	0	0	2	5	1	1	0	0	0	3	0	1	0	1	0	3	3	2	0	2
21	ST_1	CGATCTCTACGC	GGACTACCAGGGTATCTAAT	CCTGATGGTCCCATAGATTA	806F_v21	GGACTATCAGGGTATCTACT	2	G/T		T/C	56.8		806Syn_21_ST_1	0	0	0	0	0	0	0	0	0	0	0	0	0	0	0	0	3	3	4	6	1	5	2	5	0	1	7	1	2	4	3	0	4	4	6	5
22	ST_1	CGATCTCTACGC	GGACTACCAGGGTATCTAAT	CCTGATGGTCCCATAGATTA	806F_v22	GGACTATCAGGGTATCTATT	2	G/T		T/T	55.2		806Syn_22_ST_1	0	0	0	0	1	0	0	0	0	0	1	0	0	1	0	0	3	2	4	3	6	5	1	6	3	1	2	3	3	1	4	2	4	1	5	5
23	ST_1	CGATCTCTACGC	GGACTACCAGGGTATCTAAT	CCTGATGGTCCCATAGATTA	806F_v24	GGACTATCAGGGTATCTAGT	2	G/T		T/G	56.8		806Syn_24_ST_1	0	0	0	0	0	0	0	0	0	0	0	0	0	0	1	0	3	0	0	1	0	1	0	0	0	0	0	0	0	1	1	0	1	1	1	1
24	ST_1	CGATCTCTACGC	GGACTACCAGGGTATCTAAT	CCTGATGGTCCCATAGATTA	806F_v27	GGACTATCAGGGAATCTAAT	2	G/T	A/A		55.8		806Syn_27_ST_1	0	0	0	0	0	0	0	0	0	0	0	1	0	0	0	0	4	3	6	7	4	3	3	3	2	3	2	1	1	4	3	4	3	9	4	4
25	ST_1	CGATCTCTACGC	GGACTACCAGGGTATCTAAT	CCTGATGGTCCCATAGATTA	806F_v31	GGACTATCAGGGGATCTAAT	2	G/T	A/G		57.5		806Syn_31_ST_1	0	1	1	0	2	0	0	0	0	2	0	0	0	0	0	0	5	5	6	9	4	6	4	6	5	4	4	7	8	8	4	4	4	9	5	10
26	ST_1	CGATCTCTACGC	GGACTACCAGGGTATCTAAT	CCTGATGGTCCCATAGATTA	806F_v35	GGACTAACAGGGCATCTAAT	2	G/A	A/C		58.9		806Syn_35_ST_1	0	0	0	0	0	0	0	0	1	0	0	0	2	0	0	0	7	15	9	4	9	7	4	5	5	7	4	2	6	1	4	5	6	5	5	9
27	ST_1	CGATCTCTACGC	GGACTACCAGGGTATCTAAT	CCTGATGGTCCCATAGATTA	806F_v37	GGACTAACAGGGTATCTACT	2	G/A		T/C	57.3		806Syn_37_ST_1	1	0	1	2	1	0	1	0	2	2	1	3	0	0	3	1	11	10	12	7	8	13	7	12	8	6	10	10	8	4	11	8	10	9	12	15
28	ST_1	CGATCTCTACGC	GGACTACCAGGGTATCTAAT	CCTGATGGTCCCATAGATTA	806F_v38	GGACTAACAGGGTATCTATT	2	G/A		T/T	55.7		806Syn_38_ST_1	1	1	0	0	1	2	0	0	0	1	1	0	0	2	1	0	6	4	13	13	8	8	11	3	6	10	5	4	9	6	4	8	7	9	12	12
29	ST_1	CGATCTCTACGC	GGACTACCAGGGTATCTAAT	CCTGATGGTCCCATAGATTA	806F_v40	GGACTAACAGGGTATCTAGT	2	G/A		T/G	57.3		806Syn_40_ST_1	1	0	0	2	0	0	1	1	0	2	2	0	1	0	0	1	3	0	3	2	2	4	6	5	7	7	5	6	6	5	4	5	6	8	4	5
30	ST_1	CGATCTCTACGC	GGACTACCAGGGTATCTAAT	CCTGATGGTCCCATAGATTA	806F_v43	GGACTAACAGGGAATCTAAT	2	G/A	A/A		56.2		806Syn_43_ST_1	0	0	2	1	0	1	4	0	1	2	1	3	2	0	3	0	9	9	10	9	8	9	8	6	5	9	10	9	15	12	14	11	14	7	5	9
31	ST_1	CGATCTCTACGC	GGACTACCAGGGTATCTAAT	CCTGATGGTCCCATAGATTA	806F_v47	GGACTAACAGGGGATCTAAT	2	G/A	A/G		58		806Syn_47_ST_1	0	5	4	6	2	1	2	3	1	4	5	1	1	4	2	4	23	23	17	16	22	18	12	14	16	15	16	22	18	14	19	21	21	20	15	22
32	ST_1	CGATCTCTACGC	GGACTACCAGGGTATCTAAT	CCTGATGGTCCCATAGATTA	806F_v51	GGACTAGCAGGGCATCTAAT	2	G/G	A/C		60.9		806Syn_51_ST_1	0	0	0	0	0	0	0	0	0	0	0	0	0	0	0	0	2	2	4	3	2	6	1	5	0	2	2	5	9	1	4	2	1	4	2	3
33	ST_1	CGATCTCTACGC	GGACTACCAGGGTATCTAAT	CCTGATGGTCCCATAGATTA	806F_v53	GGACTAGCAGGGTATCTACT	2	G/G		T/C	59.4		806Syn_53_ST_1	0	0	1	0	2	0	1	2	3	2	0	0	3	1	0	0	6	10	9	10	7	12	7	6	6	8	4	9	7	8	6	5	14	8	10	7
34	ST_1	CGATCTCTACGC	GGACTACCAGGGTATCTAAT	CCTGATGGTCCCATAGATTA	806F_v54	GGACTAGCAGGGTATCTATT	2	G/G		T/T	57.8		806Syn_54_ST_1	0	0	2	0	1	1	0	0	0	1	2	0	0	0	0	0	3	4	5	8	8	8	7	9	6	5	6	4	7	7	3	3	10	13	9	5
35	ST_1	CGATCTCTACGC	GGACTACCAGGGTATCTAAT	CCTGATGGTCCCATAGATTA	806F_v56	GGACTAGCAGGGTATCTAGT	2	G/G		T/G	59.4		806Syn_56_ST_1	1	0	0	0	0	0	0	0	0	0	1	0	1	0	1	0	3	3	3	4	5	1	7	0	3	4	2	5	7	1	1	7	4	6	4	3
36	ST_1	CGATCTCTACGC	GGACTACCAGGGTATCTAAT	CCTGATGGTCCCATAGATTA	806F_v59	GGACTAGCAGGGAATCTAAT	2	G/G	A/A		58.3		806Syn_59_ST_1	1	1	0	0	1	1	0	2	1	0	2	0	0	1	0	2	13	5	7	7	4	3	11	7	5	7	8	4	0	7	5	5	10	8	5	4
37	ST_1	CGATCTCTACGC	GGACTACCAGGGTATCTAAT	CCTGATGGTCCCATAGATTA	806F_v63	GGACTAGCAGGGGATCTAAT	2	G/G	A/G		60.1		806Syn_63_ST_1	3	1	4	0	3	0	2	5	2	2	4	1	2	3	2	0	19	15	14	11	9	15	12	12	7	12	12	12	14	18	13	16	10	15	13	18
38	ST_1	CGATCTCTACGC	GGACTACCAGGGTATCTAAT	CCTGATGGTCCCATAGATTA	806F_v17	GGACTATCAGGGCATCTACT	3	G/T	A/C	T/C	60		806Syn_17_ST_1	0	0	0	0	0	0	0	0	0	0	0	0	0	0	0	0	0	0	0	0	0	0	0	0	0	0	0	0	0	0	0	0	0	0	0	0
39	ST_1	CGATCTCTACGC	GGACTACCAGGGTATCTAAT	CCTGATGGTCCCATAGATTA	806F_v18	GGACTATCAGGGCATCTATT	3	G/T	A/C	T/T	58.4		806Syn_18_ST_1	0	0	0	0	0	0	0	0	0	0	0	0	0	0	0	0	0	0	0	0	0	0	0	0	0	0	1	0	0	0	0	0	0	0	0	0
40	ST_1	CGATCTCTACGC	GGACTACCAGGGTATCTAAT	CCTGATGGTCCCATAGATTA	806F_v20	GGACTATCAGGGCATCTAGT	3	G/T	A/C	T/G	60		806Syn_20_ST_1	0	0	0	0	0	0	0	0	0	0	0	0	0	0	0	0	0	0	0	0	0	0	0	0	0	0	0	0	0	0	0	0	0	0	0	0
41	ST_1	CGATCTCTACGC	GGACTACCAGGGTATCTAAT	CCTGATGGTCCCATAGATTA	806F_v25	GGACTATCAGGGAATCTACT	3	G/T	A/A	T/C	57.4		806Syn_25_ST_1	0	0	0	0	0	0	0	0	0	0	0	0	0	0	0	0	0	0	0	0	0	0	0	0	0	0	0	0	0	0	1	0	0	1	0	0
42	ST_1	CGATCTCTACGC	GGACTACCAGGGTATCTAAT	CCTGATGGTCCCATAGATTA	806F_v26	GGACTATCAGGGAATCTATT	3	G/T	A/A	T/T	55.8		806Syn_26_ST_1	0	0	0	0	0	0	0	0	0	0	0	0	0	0	0	0	0	0	0	0	0	0	0	0	0	0	0	0	0	0	0	0	0	0	0	0
43	ST_1	CGATCTCTACGC	GGACTACCAGGGTATCTAAT	CCTGATGGTCCCATAGATTA	806F_v28	GGACTATCAGGGAATCTAGT	3	G/T	A/A	T/G	57.4		806Syn_28_ST_1	0	0	0	0	0	0	0	0	0	0	0	0	0	0	0	0	0	0	0	0	0	0	0	0	0	0	0	0	0	0	0	0	0	0	0	0
44	ST_1	CGATCTCTACGC	GGACTACCAGGGTATCTAAT	CCTGATGGTCCCATAGATTA	806F_v29	GGACTATCAGGGGATCTACT	3	G/T	A/G	T/C	59.2		806Syn_29_ST_1	0	0	0	0	0	0	0	0	0	0	0	0	0	0	0	0	0	0	0	0	0	1	0	0	0	0	1	0	0	0	0	0	0	0	0	0
45	ST_1	CGATCTCTACGC	GGACTACCAGGGTATCTAAT	CCTGATGGTCCCATAGATTA	806F_v30	GGACTATCAGGGGATCTATT	3	G/T	A/G	T/T	57.5		806Syn_30_ST_1	0	0	0	0	0	0	0	0	0	0	0	0	0	0	0	0	0	0	0	0	0	0	0	0	0	0	0	0	0	0	0	0	0	1	0	0
46	ST_1	CGATCTCTACGC	GGACTACCAGGGTATCTAAT	CCTGATGGTCCCATAGATTA	806F_v32	GGACTATCAGGGGATCTAGT	3	G/T	A/G	T/G	59.2		806Syn_32_ST_1	0	0	0	0	0	0	0	0	0	0	0	0	0	0	0	0	0	0	0	0	0	0	0	0	0	0	0	0	0	0	0	0	0	0	0	0
47	ST_1	CGATCTCTACGC	GGACTACCAGGGTATCTAAT	CCTGATGGTCCCATAGATTA	806F_v33	GGACTAACAGGGCATCTACT	3	G/A	A/C	T/C	60.5		806Syn_33_ST_1	0	0	0	0	0	0	0	0	0	0	0	0	0	0	0	0	0	0	1	0	0	0	0	0	0	0	0	0	0	0	0	0	0	0	0	0
48	ST_1	CGATCTCTACGC	GGACTACCAGGGTATCTAAT	CCTGATGGTCCCATAGATTA	806F_v34	GGACTAACAGGGCATCTATT	3	G/A	A/C	T/T	58.9		806Syn_34_ST_1	0	0	0	0	0	0	0	0	0	0	0	0	0	0	0	0	0	1	0	0	0	0	0	0	0	0	0	0	0	0	0	0	0	0	0	0
49	ST_1	CGATCTCTACGC	GGACTACCAGGGTATCTAAT	CCTGATGGTCCCATAGATTA	806F_v36	GGACTAACAGGGCATCTAGT	3	G/A	A/C	T/G	60.5		806Syn_36_ST_1	0	0	0	0	0	0	0	0	0	0	0	0	0	0	0	0	0	0	0	0	0	0	0	0	0	0	0	0	0	0	0	0	0	1	0	0
50	ST_1	CGATCTCTACGC	GGACTACCAGGGTATCTAAT	CCTGATGGTCCCATAGATTA	806F_v41	GGACTAACAGGGAATCTACT	3	G/A	A/A	T/C	57.9		806Syn_41_ST_1	0	0	0	0	0	0	0	0	0	0	0	0	0	0	0	0	0	0	1	0	2	0	0	0	0	1	0	0	1	0	1	1	0	0	0	0
51	ST_1	CGATCTCTACGC	GGACTACCAGGGTATCTAAT	CCTGATGGTCCCATAGATTA	806F_v42	GGACTAACAGGGAATCTATT	3	G/A	A/A	T/T	56.2		806Syn_42_ST_1	0	0	0	0	0	0	0	0	0	0	0	0	0	0	0	0	0	0	0	0	0	1	0	1	0	0	0	1	0	0	0	0	0	0	1	0
52	ST_1	CGATCTCTACGC	GGACTACCAGGGTATCTAAT	CCTGATGGTCCCATAGATTA	806F_v44	GGACTAACAGGGAATCTAGT	3	G/A	A/A	T/G	57.9		806Syn_44_ST_1	0	0	0	0	0	0	0	0	0	0	0	0	0	0	0	0	0	0	0	0	0	0	0	0	0	0	0	0	0	0	0	0	0	0	0	0
53	ST_1	CGATCTCTACGC	GGACTACCAGGGTATCTAAT	CCTGATGGTCCCATAGATTA	806F_v45	GGACTAACAGGGGATCTACT	3	G/A	A/G	T/C	59.7		806Syn_45_ST_1	0	0	0	0	1	0	0	0	0	0	1	0	0	0	0	0	5	1	0	0	0	2	0	0	1	0	1	0	1	0	0	0	2	1	0	0
54	ST_1	CGATCTCTACGC	GGACTACCAGGGTATCTAAT	CCTGATGGTCCCATAGATTA	806F_v46	GGACTAACAGGGGATCTATT	3	G/A	A/G	T/T	58		806Syn_46_ST_1	0	0	0	0	0	0	0	0	0	0	0	0	0	0	0	0	0	0	1	3	0	0	1	0	0	0	1	0	2	0	0	0	1	0	1	1
55	ST_1	CGATCTCTACGC	GGACTACCAGGGTATCTAAT	CCTGATGGTCCCATAGATTA	806F_v48	GGACTAACAGGGGATCTAGT	3	G/A	A/G	T/G	59.7		806Syn_48_ST_1	0	0	0	0	0	0	0	0	0	0	0	0	0	0	0	0	1	1	0	1	0	0	0	0	0	0	1	0	0	0	0	0	0	0	1	2
56	ST_1	CGATCTCTACGC	GGACTACCAGGGTATCTAAT	CCTGATGGTCCCATAGATTA	806F_v49	GGACTAGCAGGGCATCTACT	3	G/G	A/C	T/C	62.6		806Syn_49_ST_1	0	0	0	0	0	0	0	0	0	0	0	0	0	0	0	0	0	0	0	0	1	0	0	0	0	0	0	0	0	0	0	0	0	0	0	0
57	ST_1	CGATCTCTACGC	GGACTACCAGGGTATCTAAT	CCTGATGGTCCCATAGATTA	806F_v50	GGACTAGCAGGGCATCTATT	3	G/G	A/C	T/T	60.9		806Syn_50_ST_1	0	0	0	0	0	0	0	0	0	0	0	0	0	0	0	0	0	0	0	0	0	0	0	0	0	0	0	0	0	0	0	0	0	0	0	0
58	ST_1	CGATCTCTACGC	GGACTACCAGGGTATCTAAT	CCTGATGGTCCCATAGATTA	806F_v52	GGACTAGCAGGGCATCTAGT	3	G/G	A/C	T/G	62.6		806Syn_52_ST_1	0	0	0	0	0	0	0	0	0	0	0	0	0	0	0	0	0	0	0	0	0	0	0	0	0	0	0	0	0	0	0	0	0	0	0	0
59	ST_1	CGATCTCTACGC	GGACTACCAGGGTATCTAAT	CCTGATGGTCCCATAGATTA	806F_v57	GGACTAGCAGGGAATCTACT	3	G/G	A/A	T/C	60		806Syn_57_ST_1	0	0	0	0	0	0	0	0	0	0	0	0	0	0	0	0	0	0	1	0	1	1	0	0	0	0	0	0	0	0	0	0	1	2	0	0
60	ST_1	CGATCTCTACGC	GGACTACCAGGGTATCTAAT	CCTGATGGTCCCATAGATTA	806F_v58	GGACTAGCAGGGAATCTATT	3	G/G	A/A	T/T	58.3		806Syn_58_ST_1	0	0	0	0	0	0	0	0	0	1	0	0	0	0	0	0	1	0	0	0	0	1	1	0	0	0	0	0	0	0	0	0	0	0	0	0
61	ST_1	CGATCTCTACGC	GGACTACCAGGGTATCTAAT	CCTGATGGTCCCATAGATTA	806F_v60	GGACTAGCAGGGAATCTAGT	3	G/G	A/A	T/G	60		806Syn_60_ST_1	0	0	0	0	0	0	0	0	0	0	0	0	0	0	0	0	0	0	0	0	0	0	0	0	0	0	0	0	0	0	0	0	0	0	0	0
62	ST_1	CGATCTCTACGC	GGACTACCAGGGTATCTAAT	CCTGATGGTCCCATAGATTA	806F_v61	GGACTAGCAGGGGATCTACT	3	G/G	A/G	T/C	61.7		806Syn_61_ST_1	0	0	0	0	0	0	0	0	0	0	0	0	0	1	0	0	0	1	1	1	0	0	0	0	0	2	0	1	0	0	0	0	1	0	1	0
63	ST_1	CGATCTCTACGC	GGACTACCAGGGTATCTAAT	CCTGATGGTCCCATAGATTA	806F_v62	GGACTAGCAGGGGATCTATT	3	G/G	A/G	T/T	60.1		806Syn_62_ST_1	0	0	0	0	0	0	0	0	0	0	0	0	0	0	0	0	0	0	0	0	0	0	0	0	0	0	0	0	0	0	0	0	0	0	0	0
64	ST_1	CGATCTCTACGC	GGACTACCAGGGTATCTAAT	CCTGATGGTCCCATAGATTA	806F_v64	GGACTAGCAGGGGATCTAGT	3	G/G	A/G	T/G	61.7		806Syn_64_ST_1	0	0	0	0	0	0	0	0	0	0	0	0	0	0	0	0	0	0	0	1	0	0	0	1	0	0	0	0	1	0	0	1	0	1	0	1
65	ST_4	CTTACCAGTCGC	GGACTACCAGGGCATCTAAT	CCTGATGGTCCCGTAGATTA	806F_v1	GGACTACCAGGGTATCTAAT	1		G/T		57.4		806Syn_1_ST_2	0	0	0	0	0	1	1	0	1	0	0	0	0	1	0	1	2	0	0	0	0	0	0	0	3	0	0	0	0	0	0	0	1	0	0	0
66	ST_4	CTTACCAGTCGC	GGACTACCAGGGCATCTAAT	CCTGATGGTCCCGTAGATTA	806F_v4	GGACTACCAGGGCATCTAAT	0				60.6		806Syn_4_ST_2	0	0	0	0	0	0	0	0	0	0	0	0	0	0	0	0	0	0	0	0	0	0	0	0	0	0	0	0	0	0	1	0	0	0	0	0
67	ST_4	CTTACCAGTCGC	GGACTACCAGGGCATCTAAT	CCTGATGGTCCCGTAGATTA	806F_v6	GGACTACCAGGGTATCTACT	2		G/T	T/C	59.1		806Syn_6_ST_2	0	0	0	0	0	0	0	0	0	0	0	0	0	0	0	0	0	0	0	0	0	0	0	0	0	0	0	0	0	0	0	0	0	0	0	0
68	ST_4	CTTACCAGTCGC	GGACTACCAGGGCATCTAAT	CCTGATGGTCCCGTAGATTA	806F_v7	GGACTACCAGGGTATCTATT	2		G/T	T/T	57.4		806Syn_7_ST_2	0	0	0	0	0	0	0	0	0	0	0	0	0	0	0	0	0	0	0	0	0	0	0	0	0	0	0	0	0	0	0	0	0	0	0	0
69	ST_4	CTTACCAGTCGC	GGACTACCAGGGCATCTAAT	CCTGATGGTCCCGTAGATTA	806F_v8	GGACTACCAGGGTATCTAGT	2		G/T	T/G	59.1		806Syn_8_ST_2	0	0	0	0	0	0	0	0	0	0	0	0	0	0	0	0	0	0	0	0	0	0	0	1	0	0	0	0	0	0	0	0	0	0	0	0
70	ST_4	CTTACCAGTCGC	GGACTACCAGGGCATCTAAT	CCTGATGGTCCCGTAGATTA	806F_v11	GGACTACCAGGGAATCTAAT	1		G/A		58		806Syn_11_ST_2	0	0	1	0	0	0	0	0	0	0	0	0	0	0	1	0	0	0	1	0	0	0	0	0	0	0	1	0	0	0	0	0	0	0	0	0
71	ST_4	CTTACCAGTCGC	GGACTACCAGGGCATCTAAT	CCTGATGGTCCCGTAGATTA	806F_v15	GGACTACCAGGGGATCTAAT	1		G/G		59.8		806Syn_15_ST_2	0	0	0	0	0	0	0	0	0	0	0	0	0	0	0	0	1	0	0	0	0	0	0	1	0	0	0	0	0	0	0	0	0	0	0	0
72	ST_4	CTTACCAGTCGC	GGACTACCAGGGCATCTAAT	CCTGATGGTCCCGTAGATTA	806F_v23	GGACTATCAGGGTATCTAAT	2	G/T	G/T		55.2		806Syn_23_ST_2	0	0	0	0	0	0	0	0	0	0	0	0	0	0	0	0	0	0	0	0	1	0	1	0	0	0	0	0	0	0	0	0	0	0	0	0
73	ST_4	CTTACCAGTCGC	GGACTACCAGGGCATCTAAT	CCTGATGGTCCCGTAGATTA	806F_v39	GGACTAACAGGGTATCTAAT	2	G/A	G/T		55.7		806Syn_39_ST_2	0	1	0	0	0	0	0	0	0	0	0	0	0	0	0	0	0	0	0	0	0	0	0	1	0	0	0	0	0	0	0	0	1	0	0	0
74	ST_4	CTTACCAGTCGC	GGACTACCAGGGCATCTAAT	CCTGATGGTCCCGTAGATTA	806F_v55	GGACTAGCAGGGTATCTAAT	2	G/G	G/T		57.8		806Syn_55_ST_2	0	0	0	0	0	0	0	0	0	0	0	0	0	0	0	0	0	0	0	0	0	0	0	0	0	0	0	0	0	0	0	0	0	0	0	0
75	ST_4	CTTACCAGTCGC	GGACTACCAGGGCATCTAAT	CCTGATGGTCCCGTAGATTA	806F_v2	GGACTACCAGGGCATCTACT	1			T/C	62.3		806Syn_2_ST_2	0	0	0	0	0	0	0	0	0	0	0	0	0	0	0	0	0	0	0	0	0	0	0	0	0	0	0	0	0	0	0	0	0	0	0	0
76	ST_4	CTTACCAGTCGC	GGACTACCAGGGCATCTAAT	CCTGATGGTCCCGTAGATTA	806F_v3	GGACTACCAGGGCATCTATT	1			T/T	60.6		806Syn_3_ST_2	0	0	0	0	0	0	0	0	0	0	0	0	0	1	0	0	0	0	0	0	0	0	0	0	0	0	0	0	0	0	0	0	0	0	0	0
77	ST_4	CTTACCAGTCGC	GGACTACCAGGGCATCTAAT	CCTGATGGTCCCGTAGATTA	806F_v5	GGACTACCAGGGCATCTAGT	1			T/G	62.3		806Syn_5_ST_2	0	0	0	0	0	0	0	0	0	0	0	0	0	0	0	0	0	0	0	0	0	0	0	0	0	0	0	0	0	0	0	0	0	0	0	0
78	ST_4	CTTACCAGTCGC	GGACTACCAGGGCATCTAAT	CCTGATGGTCCCGTAGATTA	806F_v9	GGACTACCAGGGAATCTACT	2		G/A	T/C	59.7		806Syn_9_ST_2	0	0	0	1	0	0	0	0	0	0	0	0	0	0	0	0	0	0	0	0	0	0	0	0	0	0	0	0	0	0	0	0	0	0	0	0
79	ST_4	CTTACCAGTCGC	GGACTACCAGGGCATCTAAT	CCTGATGGTCCCGTAGATTA	806F_v10	GGACTACCAGGGAATCTATT	2		G/A	T/T	58		806Syn_10_ST_2	0	0	0	0	0	0	0	0	0	0	0	0	0	0	0	0	0	0	0	0	0	0	0	0	0	0	0	0	0	0	0	0	0	0	0	0
80	ST_4	CTTACCAGTCGC	GGACTACCAGGGCATCTAAT	CCTGATGGTCCCGTAGATTA	806F_v12	GGACTACCAGGGAATCTAGT	2		G/A	T/G	59.7		806Syn_12_ST_2	0	0	0	0	0	0	0	0	0	0	0	0	0	0	0	0	0	0	0	0	0	0	0	0	0	0	0	0	0	0	0	0	0	0	0	0
81	ST_4	CTTACCAGTCGC	GGACTACCAGGGCATCTAAT	CCTGATGGTCCCGTAGATTA	806F_v13	GGACTACCAGGGGATCTACT	2		G/G	T/C	61.5		806Syn_13_ST_2	0	0	0	0	0	0	0	0	0	0	0	0	0	0	0	0	0	0	0	0	0	0	0	0	0	0	0	0	0	0	0	0	0	0	0	0
82	ST_4	CTTACCAGTCGC	GGACTACCAGGGCATCTAAT	CCTGATGGTCCCGTAGATTA	806F_v14	GGACTACCAGGGGATCTATT	2		G/G	T/T	59.8		806Syn_14_ST_2	0	0	0	0	0	0	0	0	0	0	0	0	0	0	0	0	0	0	0	0	0	0	0	0	0	0	0	0	0	0	0	0	0	0	0	0
83	ST_4	CTTACCAGTCGC	GGACTACCAGGGCATCTAAT	CCTGATGGTCCCGTAGATTA	806F_v16	GGACTACCAGGGGATCTAGT	2		G/G	T/G	61.5		806Syn_16_ST_2	0	0	0	0	0	0	0	0	0	0	0	0	0	0	0	0	0	0	0	0	0	0	0	0	0	0	0	0	0	0	0	0	0	0	0	0
84	ST_4	CTTACCAGTCGC	GGACTACCAGGGCATCTAAT	CCTGATGGTCCCGTAGATTA	806F_v19	GGACTATCAGGGCATCTAAT	1	G/T			58.4		806Syn_19_ST_2	0	0	0	0	0	0	0	0	0	0	0	0	0	1	0	0	0	0	0	0	0	0	0	0	0	0	0	0	0	0	0	0	0	0	0	0
85	ST_4	CTTACCAGTCGC	GGACTACCAGGGCATCTAAT	CCTGATGGTCCCGTAGATTA	806F_v21	GGACTATCAGGGTATCTACT	3	G/T	G/T	T/C	56.8		806Syn_21_ST_2	0	0	0	0	0	0	0	0	0	0	0	0	0	0	0	0	0	0	0	0	0	0	0	0	0	0	0	0	0	0	0	0	0	0	0	0
86	ST_4	CTTACCAGTCGC	GGACTACCAGGGCATCTAAT	CCTGATGGTCCCGTAGATTA	806F_v22	GGACTATCAGGGTATCTATT	3	G/T	G/T	T/T	55.2		806Syn_22_ST_2	0	0	0	0	0	0	0	0	0	0	0	0	0	0	0	0	0	0	0	0	0	0	0	0	0	0	0	0	0	0	0	0	0	0	0	0
87	ST_4	CTTACCAGTCGC	GGACTACCAGGGCATCTAAT	CCTGATGGTCCCGTAGATTA	806F_v24	GGACTATCAGGGTATCTAGT	3	G/T	G/T	T/G	56.8		806Syn_24_ST_2	0	0	0	0	0	0	0	0	0	0	0	0	0	0	0	0	0	0	0	0	0	0	0	0	0	0	0	0	0	0	0	0	0	0	0	0
88	ST_4	CTTACCAGTCGC	GGACTACCAGGGCATCTAAT	CCTGATGGTCCCGTAGATTA	806F_v27	GGACTATCAGGGAATCTAAT	2	G/T	G/A		55.8		806Syn_27_ST_2	0	0	0	0	0	0	0	0	0	0	0	0	0	0	0	0	0	0	0	0	0	0	0	0	0	0	0	0	0	0	0	0	0	0	0	0
89	ST_4	CTTACCAGTCGC	GGACTACCAGGGCATCTAAT	CCTGATGGTCCCGTAGATTA	806F_v31	GGACTATCAGGGGATCTAAT	2	G/T	G/G		57.5		806Syn_31_ST_2	0	0	0	0	0	0	0	0	0	0	0	0	0	0	0	0	0	0	0	0	0	0	0	0	0	0	0	0	0	0	0	0	0	0	0	0
90	ST_4	CTTACCAGTCGC	GGACTACCAGGGCATCTAAT	CCTGATGGTCCCGTAGATTA	806F_v35	GGACTAACAGGGCATCTAAT	1	G/A			58.9		806Syn_35_ST_2	0	0	0	0	0	0	0	0	0	0	0	0	0	0	0	0	0	0	0	0	0	0	0	0	0	0	0	0	0	1	0	0	0	0	0	0
91	ST_4	CTTACCAGTCGC	GGACTACCAGGGCATCTAAT	CCTGATGGTCCCGTAGATTA	806F_v37	GGACTAACAGGGTATCTACT	3	G/A	G/T	T/C	57.3		806Syn_37_ST_2	0	0	0	0	0	0	0	0	0	0	0	0	0	0	0	0	0	0	0	0	0	0	0	0	0	0	0	0	0	0	0	0	0	0	0	0
92	ST_4	CTTACCAGTCGC	GGACTACCAGGGCATCTAAT	CCTGATGGTCCCGTAGATTA	806F_v38	GGACTAACAGGGTATCTATT	3	G/A	G/T	T/T	55.7		806Syn_38_ST_2	0	0	0	0	0	0	0	0	0	0	0	0	0	0	0	0	0	0	0	0	0	0	0	0	0	0	0	0	0	0	0	0	0	0	0	0
93	ST_4	CTTACCAGTCGC	GGACTACCAGGGCATCTAAT	CCTGATGGTCCCGTAGATTA	806F_v40	GGACTAACAGGGTATCTAGT	3	G/A	G/T	T/G	57.3		806Syn_40_ST_2	0	0	0	0	0	0	0	0	0	0	0	0	0	0	0	0	0	0	0	0	0	0	0	0	0	0	0	0	0	0	0	0	0	0	0	0
94	ST_4	CTTACCAGTCGC	GGACTACCAGGGCATCTAAT	CCTGATGGTCCCGTAGATTA	806F_v43	GGACTAACAGGGAATCTAAT	2	G/A	G/A		56.2		806Syn_43_ST_2	0	0	0	0	0	0	0	0	0	0	0	0	0	0	0	0	0	0	0	0	0	0	0	0	0	0	0	0	0	0	0	0	0	0	0	0
95	ST_4	CTTACCAGTCGC	GGACTACCAGGGCATCTAAT	CCTGATGGTCCCGTAGATTA	806F_v47	GGACTAACAGGGGATCTAAT	2	G/A	G/G		58		806Syn_47_ST_2	0	0	0	0	0	0	0	0	0	0	0	0	0	0	0	0	0	0	0	0	1	0	0	0	0	0	0	0	0	0	0	0	0	0	0	0
96	ST_4	CTTACCAGTCGC	GGACTACCAGGGCATCTAAT	CCTGATGGTCCCGTAGATTA	806F_v51	GGACTAGCAGGGCATCTAAT	1	G/G			60.9		806Syn_51_ST_2	0	0	0	0	0	0	0	0	0	0	0	0	0	0	0	0	0	0	0	0	0	0	0	0	0	0	0	0	0	0	0	0	0	0	0	0
97	ST_4	CTTACCAGTCGC	GGACTACCAGGGCATCTAAT	CCTGATGGTCCCGTAGATTA	806F_v53	GGACTAGCAGGGTATCTACT	3	G/G	G/T	T/C	59.4		806Syn_53_ST_2	0	0	0	0	0	0	0	0	0	0	0	0	0	0	0	0	0	0	0	0	0	0	0	0	0	0	0	0	0	0	0	0	0	0	0	0
98	ST_4	CTTACCAGTCGC	GGACTACCAGGGCATCTAAT	CCTGATGGTCCCGTAGATTA	806F_v54	GGACTAGCAGGGTATCTATT	3	G/G	G/T	T/T	57.8		806Syn_54_ST_2	0	0	0	0	0	0	0	0	0	0	0	0	0	0	0	0	0	0	0	0	0	0	0	0	0	0	0	0	0	0	0	0	0	0	0	0
99	ST_4	CTTACCAGTCGC	GGACTACCAGGGCATCTAAT	CCTGATGGTCCCGTAGATTA	806F_v56	GGACTAGCAGGGTATCTAGT	3	G/G	G/T	T/G	59.4		806Syn_56_ST_2	0	0	0	0	0	0	0	0	0	0	0	0	0	0	0	0	0	0	0	0	0	0	0	0	0	0	0	0	0	0	0	0	0	0	0	0
100	ST_4	CTTACCAGTCGC	GGACTACCAGGGCATCTAAT	CCTGATGGTCCCGTAGATTA	806F_v59	GGACTAGCAGGGAATCTAAT	2	G/G	G/A		58.3		806Syn_59_ST_2	0	0	0	0	0	0	0	0	0	0	0	0	0	0	0	0	0	0	0	0	0	0	0	0	0	0	0	0	0	0	0	0	0	0	0	0
101	ST_4	CTTACCAGTCGC	GGACTACCAGGGCATCTAAT	CCTGATGGTCCCGTAGATTA	806F_v63	GGACTAGCAGGGGATCTAAT	2	G/G	G/G		60.1		806Syn_63_ST_2	0	0	0	0	0	0	0	0	0	0	0	0	0	0	0	0	0	0	0	0	0	0	0	0	0	0	0	0	0	0	0	0	0	0	0	0
102	ST_4	CTTACCAGTCGC	GGACTACCAGGGCATCTAAT	CCTGATGGTCCCGTAGATTA	806F_v17	GGACTATCAGGGCATCTACT	2	G/T		T/C	60		806Syn_17_ST_2	0	0	0	0	0	0	0	0	0	0	0	0	0	0	0	0	0	0	0	0	0	0	0	0	0	0	0	0	0	0	0	0	0	0	0	0
103	ST_4	CTTACCAGTCGC	GGACTACCAGGGCATCTAAT	CCTGATGGTCCCGTAGATTA	806F_v18	GGACTATCAGGGCATCTATT	2	G/T		T/T	58.4		806Syn_18_ST_2	0	0	0	0	0	0	0	0	0	0	0	0	0	0	0	0	0	0	0	0	0	0	0	0	0	0	0	0	0	0	0	0	0	0	0	0
104	ST_4	CTTACCAGTCGC	GGACTACCAGGGCATCTAAT	CCTGATGGTCCCGTAGATTA	806F_v20	GGACTATCAGGGCATCTAGT	2	G/T		T/G	60		806Syn_20_ST_2	0	0	0	0	0	0	0	0	0	0	0	0	0	0	0	0	0	0	0	0	0	0	0	0	0	0	0	0	0	0	0	0	0	0	0	0
105	ST_4	CTTACCAGTCGC	GGACTACCAGGGCATCTAAT	CCTGATGGTCCCGTAGATTA	806F_v25	GGACTATCAGGGAATCTACT	3	G/T	G/A	T/C	57.4		806Syn_25_ST_2	0	0	0	0	0	0	0	0	0	0	0	0	0	0	0	0	0	0	0	0	0	0	0	0	0	0	0	0	0	0	0	0	0	0	0	0
106	ST_4	CTTACCAGTCGC	GGACTACCAGGGCATCTAAT	CCTGATGGTCCCGTAGATTA	806F_v26	GGACTATCAGGGAATCTATT	3	G/T	G/A	T/T	55.8		806Syn_26_ST_2	0	0	0	0	0	0	0	0	0	0	0	0	0	0	0	0	0	0	0	0	0	0	0	0	0	0	0	0	0	0	0	0	0	0	0	0
107	ST_4	CTTACCAGTCGC	GGACTACCAGGGCATCTAAT	CCTGATGGTCCCGTAGATTA	806F_v28	GGACTATCAGGGAATCTAGT	3	G/T	G/A	T/G	57.4		806Syn_28_ST_2	0	0	0	0	0	0	0	0	0	0	0	0	0	0	0	0	0	0	0	0	0	0	0	0	0	0	0	0	0	0	0	0	0	0	0	0
108	ST_4	CTTACCAGTCGC	GGACTACCAGGGCATCTAAT	CCTGATGGTCCCGTAGATTA	806F_v29	GGACTATCAGGGGATCTACT	3	G/T	G/G	T/C	59.2		806Syn_29_ST_2	0	0	0	0	0	0	0	0	0	0	0	0	0	0	0	0	0	0	0	0	0	0	0	0	0	0	0	0	0	0	0	0	0	0	0	0
109	ST_4	CTTACCAGTCGC	GGACTACCAGGGCATCTAAT	CCTGATGGTCCCGTAGATTA	806F_v30	GGACTATCAGGGGATCTATT	3	G/T	G/G	T/T	57.5		806Syn_30_ST_2	0	0	0	0	0	0	0	0	0	0	0	0	0	0	0	0	0	0	0	0	0	0	0	0	0	0	0	0	0	0	0	0	0	0	0	0
110	ST_4	CTTACCAGTCGC	GGACTACCAGGGCATCTAAT	CCTGATGGTCCCGTAGATTA	806F_v32	GGACTATCAGGGGATCTAGT	3	G/T	G/G	T/G	59.2		806Syn_32_ST_2	0	0	0	0	0	0	0	0	0	0	0	0	0	0	0	0	0	0	0	0	0	0	0	0	0	0	0	0	0	0	0	0	0	0	0	0
111	ST_4	CTTACCAGTCGC	GGACTACCAGGGCATCTAAT	CCTGATGGTCCCGTAGATTA	806F_v33	GGACTAACAGGGCATCTACT	2	G/A		T/C	60.5		806Syn_33_ST_2	0	0	0	0	0	0	0	0	0	0	0	0	0	0	0	0	0	0	0	0	0	0	0	0	0	0	0	0	0	0	0	0	0	0	0	0
112	ST_4	CTTACCAGTCGC	GGACTACCAGGGCATCTAAT	CCTGATGGTCCCGTAGATTA	806F_v34	GGACTAACAGGGCATCTATT	2	G/A		T/T	58.9		806Syn_34_ST_2	0	0	0	0	0	0	0	0	0	0	0	0	0	0	0	0	0	0	0	0	0	0	0	0	0	0	0	0	0	0	0	0	0	0	0	0
113	ST_4	CTTACCAGTCGC	GGACTACCAGGGCATCTAAT	CCTGATGGTCCCGTAGATTA	806F_v36	GGACTAACAGGGCATCTAGT	2	G/A		T/G	60.5		806Syn_36_ST_2	0	0	0	0	0	0	0	0	0	0	0	0	0	0	0	0	0	0	0	0	0	0	0	0	0	0	0	0	0	0	0	0	0	0	0	0
114	ST_4	CTTACCAGTCGC	GGACTACCAGGGCATCTAAT	CCTGATGGTCCCGTAGATTA	806F_v41	GGACTAACAGGGAATCTACT	3	G/A	G/A	T/C	57.9		806Syn_41_ST_2	0	0	0	0	0	0	0	0	0	0	0	0	0	0	0	0	0	0	0	0	0	0	0	0	0	0	0	0	0	0	0	0	0	0	0	0
115	ST_4	CTTACCAGTCGC	GGACTACCAGGGCATCTAAT	CCTGATGGTCCCGTAGATTA	806F_v42	GGACTAACAGGGAATCTATT	3	G/A	G/A	T/T	56.2		806Syn_42_ST_2	0	0	0	0	0	0	0	0	0	0	0	0	0	0	0	0	0	0	0	0	0	0	0	0	0	0	0	0	0	0	0	0	0	0	0	0
116	ST_4	CTTACCAGTCGC	GGACTACCAGGGCATCTAAT	CCTGATGGTCCCGTAGATTA	806F_v44	GGACTAACAGGGAATCTAGT	3	G/A	G/A	T/G	57.9		806Syn_44_ST_2	0	0	0	0	0	0	0	0	0	0	0	0	0	0	0	0	0	0	0	0	0	0	0	0	0	0	0	0	0	0	0	0	0	0	0	0
117	ST_4	CTTACCAGTCGC	GGACTACCAGGGCATCTAAT	CCTGATGGTCCCGTAGATTA	806F_v45	GGACTAACAGGGGATCTACT	3	G/A	G/G	T/C	59.7		806Syn_45_ST_2	0	0	0	0	0	0	0	0	0	0	0	0	0	0	0	0	0	0	0	0	0	0	0	0	0	0	0	0	0	0	0	0	0	0	0	0
118	ST_4	CTTACCAGTCGC	GGACTACCAGGGCATCTAAT	CCTGATGGTCCCGTAGATTA	806F_v46	GGACTAACAGGGGATCTATT	3	G/A	G/G	T/T	58		806Syn_46_ST_2	0	0	0	0	0	0	0	0	0	0	0	0	0	0	0	0	0	0	0	0	0	0	0	0	0	0	0	0	0	0	0	0	0	0	0	0
119	ST_4	CTTACCAGTCGC	GGACTACCAGGGCATCTAAT	CCTGATGGTCCCGTAGATTA	806F_v48	GGACTAACAGGGGATCTAGT	3	G/A	G/G	T/G	59.7		806Syn_48_ST_2	0	0	0	0	0	0	0	0	0	0	0	0	0	0	0	0	0	0	0	0	0	0	0	0	0	0	0	0	0	0	0	0	0	0	0	0
120	ST_4	CTTACCAGTCGC	GGACTACCAGGGCATCTAAT	CCTGATGGTCCCGTAGATTA	806F_v49	GGACTAGCAGGGCATCTACT	2	G/G		T/C	62.6		806Syn_49_ST_2	0	0	0	0	0	0	0	0	0	0	0	0	0	0	0	0	0	0	0	0	0	0	0	0	0	0	0	0	0	0	0	0	0	0	0	0
121	ST_4	CTTACCAGTCGC	GGACTACCAGGGCATCTAAT	CCTGATGGTCCCGTAGATTA	806F_v50	GGACTAGCAGGGCATCTATT	2	G/G		T/T	60.9		806Syn_50_ST_2	0	0	0	0	0	0	0	0	0	0	0	0	0	0	0	0	0	0	0	0	0	0	0	0	0	0	0	0	0	0	0	0	0	0	0	0
122	ST_4	CTTACCAGTCGC	GGACTACCAGGGCATCTAAT	CCTGATGGTCCCGTAGATTA	806F_v52	GGACTAGCAGGGCATCTAGT	2	G/G		T/G	62.6		806Syn_52_ST_2	0	0	0	0	0	0	0	0	0	0	0	0	0	0	0	0	0	0	0	0	0	0	0	0	0	0	0	0	0	0	0	0	0	0	0	0
123	ST_4	CTTACCAGTCGC	GGACTACCAGGGCATCTAAT	CCTGATGGTCCCGTAGATTA	806F_v57	GGACTAGCAGGGAATCTACT	3	G/G	G/A	T/C	60		806Syn_57_ST_2	0	0	0	0	0	0	0	0	0	0	0	0	0	0	0	0	0	0	0	0	0	0	0	0	0	0	0	0	0	0	0	0	0	0	0	0
124	ST_4	CTTACCAGTCGC	GGACTACCAGGGCATCTAAT	CCTGATGGTCCCGTAGATTA	806F_v58	GGACTAGCAGGGAATCTATT	3	G/G	G/A	T/T	58.3		806Syn_58_ST_2	0	0	0	0	0	0	0	0	0	0	0	0	0	0	0	0	0	0	0	0	0	0	0	0	0	0	0	0	0	0	0	0	0	0	0	0
125	ST_4	CTTACCAGTCGC	GGACTACCAGGGCATCTAAT	CCTGATGGTCCCGTAGATTA	806F_v60	GGACTAGCAGGGAATCTAGT	3	G/G	G/A	T/G	60		806Syn_60_ST_2	0	0	0	0	0	0	0	0	0	0	0	0	0	0	0	0	0	0	0	0	0	0	0	0	0	0	0	0	0	0	0	0	0	0	0	0
126	ST_4	CTTACCAGTCGC	GGACTACCAGGGCATCTAAT	CCTGATGGTCCCGTAGATTA	806F_v61	GGACTAGCAGGGGATCTACT	3	G/G	G/G	T/C	61.7		806Syn_61_ST_2	0	0	0	0	0	0	0	0	0	0	0	0	0	0	0	0	0	0	0	0	0	0	0	0	0	0	0	0	0	0	0	0	0	0	0	0
127	ST_4	CTTACCAGTCGC	GGACTACCAGGGCATCTAAT	CCTGATGGTCCCGTAGATTA	806F_v62	GGACTAGCAGGGGATCTATT	3	G/G	G/G	T/T	60.1		806Syn_62_ST_2	0	0	0	0	0	0	0	0	0	0	0	0	0	0	0	0	0	0	0	0	0	0	0	0	0	0	0	0	0	0	0	0	0	0	0	0
128	ST_4	CTTACCAGTCGC	GGACTACCAGGGCATCTAAT	CCTGATGGTCCCGTAGATTA	806F_v64	GGACTAGCAGGGGATCTAGT	3	G/G	G/G	T/G	61.7		806Syn_64_ST_2	0	0	0	0	0	0	0	0	0	0	0	0	0	0	0	0	0	0	0	0	0	0	0	0	0	0	0	0	0	0	0	0	0	0	0	0
129	ST_6	TGCCAGCCCTAT	GGACTACCAGGGTATCTACT	CCTGATGGTCCCATAGATGA	806F_v1	GGACTACCAGGGTATCTAAT	1			G/A	57.4		806Syn_1_ST_3	0	0	0	0	0	0	0	0	0	0	0	0	0	0	0	0	0	0	0	0	0	0	1	0	0	0	0	0	0	0	1	0	0	0	0	0
130	ST_6	TGCCAGCCCTAT	GGACTACCAGGGTATCTACT	CCTGATGGTCCCATAGATGA	806F_v4	GGACTACCAGGGCATCTAAT	2		A/C	G/A	60.6		806Syn_4_ST_3	0	0	0	0	0	0	0	0	0	0	0	0	0	0	0	0	0	0	0	0	0	0	0	0	0	0	0	0	0	0	0	0	0	0	0	0
131	ST_6	TGCCAGCCCTAT	GGACTACCAGGGTATCTACT	CCTGATGGTCCCATAGATGA	806F_v6	GGACTACCAGGGTATCTACT	0				59.1		806Syn_6_ST_3	0	0	0	0	0	1	0	0	0	0	0	0	0	0	0	0	0	1	0	1	1	1	0	1	0	0	0	0	0	0	0	1	0	0	0	2
132	ST_6	TGCCAGCCCTAT	GGACTACCAGGGTATCTACT	CCTGATGGTCCCATAGATGA	806F_v7	GGACTACCAGGGTATCTATT	1			G/T	57.4		806Syn_7_ST_3	0	0	0	0	0	0	0	0	0	0	0	0	1	0	0	0	0	0	0	0	0	0	0	0	0	0	0	0	0	0	0	0	0	0	0	0
133	ST_6	TGCCAGCCCTAT	GGACTACCAGGGTATCTACT	CCTGATGGTCCCATAGATGA	806F_v8	GGACTACCAGGGTATCTAGT	1			G/G	59.1		806Syn_8_ST_3	0	0	0	0	0	0	0	0	0	0	0	0	0	0	0	0	0	0	0	0	0	0	0	0	0	0	0	0	0	0	0	0	0	0	0	0
134	ST_6	TGCCAGCCCTAT	GGACTACCAGGGTATCTACT	CCTGATGGTCCCATAGATGA	806F_v11	GGACTACCAGGGAATCTAAT	2		A/A	G/A	58		806Syn_11_ST_3	0	0	0	0	0	0	0	0	0	0	0	0	0	0	0	0	0	0	0	0	0	0	0	0	0	0	0	0	0	0	0	0	0	0	0	0
135	ST_6	TGCCAGCCCTAT	GGACTACCAGGGTATCTACT	CCTGATGGTCCCATAGATGA	806F_v15	GGACTACCAGGGGATCTAAT	2		A/G	G/A	59.8		806Syn_15_ST_3	0	0	0	0	0	0	0	0	0	0	0	0	0	0	0	0	0	0	0	0	0	0	0	0	0	0	0	0	0	0	0	0	0	0	0	0
136	ST_6	TGCCAGCCCTAT	GGACTACCAGGGTATCTACT	CCTGATGGTCCCATAGATGA	806F_v23	GGACTATCAGGGTATCTAAT	2	G/T		G/A	55.2		806Syn_23_ST_3	0	0	0	0	0	0	0	0	0	0	0	0	0	0	0	0	0	0	0	0	0	0	0	0	0	0	0	0	0	0	0	0	0	0	0	0
137	ST_6	TGCCAGCCCTAT	GGACTACCAGGGTATCTACT	CCTGATGGTCCCATAGATGA	806F_v39	GGACTAACAGGGTATCTAAT	2	G/A		G/A	55.7		806Syn_39_ST_3	0	0	0	0	0	0	0	0	0	0	1	0	0	0	0	0	0	0	0	0	0	0	0	0	0	0	0	0	0	0	0	0	0	0	0	0
138	ST_6	TGCCAGCCCTAT	GGACTACCAGGGTATCTACT	CCTGATGGTCCCATAGATGA	806F_v55	GGACTAGCAGGGTATCTAAT	2	G/G		G/A	57.8		806Syn_55_ST_3	0	0	0	0	0	0	0	0	0	0	0	0	0	0	0	0	0	1	0	0	0	0	0	0	0	0	0	0	0	0	0	0	0	0	0	0
139	ST_6	TGCCAGCCCTAT	GGACTACCAGGGTATCTACT	CCTGATGGTCCCATAGATGA	806F_v2	GGACTACCAGGGCATCTACT	1		A/C		62.3		806Syn_2_ST_3	0	0	0	0	0	0	0	0	0	0	0	0	0	0	0	0	0	0	0	0	0	0	0	0	0	0	0	0	0	0	0	0	0	0	0	0
140	ST_6	TGCCAGCCCTAT	GGACTACCAGGGTATCTACT	CCTGATGGTCCCATAGATGA	806F_v3	GGACTACCAGGGCATCTATT	2		A/C	G/T	60.6		806Syn_3_ST_3	0	0	0	0	0	0	0	0	0	0	0	0	0	0	0	0	0	0	0	0	0	0	0	0	0	0	0	0	0	0	0	0	0	0	0	0
141	ST_6	TGCCAGCCCTAT	GGACTACCAGGGTATCTACT	CCTGATGGTCCCATAGATGA	806F_v5	GGACTACCAGGGCATCTAGT	2		A/C	G/G	62.3		806Syn_5_ST_3	0	0	0	0	0	0	0	0	0	0	0	0	0	0	0	0	0	0	0	0	0	0	0	0	0	0	0	0	0	0	0	0	0	0	0	0
142	ST_6	TGCCAGCCCTAT	GGACTACCAGGGTATCTACT	CCTGATGGTCCCATAGATGA	806F_v9	GGACTACCAGGGAATCTACT	1		A/A		59.7		806Syn_9_ST_3	0	0	0	0	0	0	0	0	0	0	0	0	0	2	0	0	0	0	0	0	0	0	0	0	0	0	0	0	0	0	0	0	0	0	0	0
143	ST_6	TGCCAGCCCTAT	GGACTACCAGGGTATCTACT	CCTGATGGTCCCATAGATGA	806F_v10	GGACTACCAGGGAATCTATT	2		A/A	G/T	58		806Syn_10_ST_3	0	0	0	0	0	0	0	0	0	0	0	0	0	0	0	0	0	0	0	0	0	0	0	0	0	0	0	0	0	0	0	0	0	0	0	0
144	ST_6	TGCCAGCCCTAT	GGACTACCAGGGTATCTACT	CCTGATGGTCCCATAGATGA	806F_v12	GGACTACCAGGGAATCTAGT	2		A/A	G/G	59.7		806Syn_12_ST_3	0	0	0	0	0	0	0	0	0	0	0	0	0	0	0	0	0	0	0	0	0	0	0	0	0	0	0	0	0	0	0	0	0	0	0	0
145	ST_6	TGCCAGCCCTAT	GGACTACCAGGGTATCTACT	CCTGATGGTCCCATAGATGA	806F_v13	GGACTACCAGGGGATCTACT	1		A/G		61.5		806Syn_13_ST_3	0	0	0	0	0	0	0	0	0	0	0	0	0	0	0	0	0	0	0	0	0	0	0	0	0	0	0	0	0	0	0	0	0	0	0	0
146	ST_6	TGCCAGCCCTAT	GGACTACCAGGGTATCTACT	CCTGATGGTCCCATAGATGA	806F_v14	GGACTACCAGGGGATCTATT	2		A/G	G/T	59.8		806Syn_14_ST_3	0	0	0	0	0	0	0	0	0	0	0	0	0	0	0	0	0	0	0	0	0	0	0	0	0	0	0	0	0	0	0	0	0	0	0	0
147	ST_6	TGCCAGCCCTAT	GGACTACCAGGGTATCTACT	CCTGATGGTCCCATAGATGA	806F_v16	GGACTACCAGGGGATCTAGT	2		A/G	G/G	61.5		806Syn_16_ST_3	0	0	0	0	0	0	0	0	0	0	0	0	0	0	0	0	0	0	0	0	0	0	0	0	0	0	0	0	0	0	0	0	0	0	0	0
148	ST_6	TGCCAGCCCTAT	GGACTACCAGGGTATCTACT	CCTGATGGTCCCATAGATGA	806F_v19	GGACTATCAGGGCATCTAAT	3	G/T	A/C	G/A	58.4		806Syn_19_ST_3	0	0	0	0	0	0	0	0	0	0	0	0	0	0	0	0	0	0	0	0	0	0	0	0	0	0	0	0	0	0	0	0	0	0	0	0
149	ST_6	TGCCAGCCCTAT	GGACTACCAGGGTATCTACT	CCTGATGGTCCCATAGATGA	806F_v21	GGACTATCAGGGTATCTACT	1	G/T			56.8		806Syn_21_ST_3	0	0	0	0	0	0	0	0	0	0	0	0	0	0	0	0	0	0	0	0	0	0	0	0	0	0	0	0	0	0	0	0	0	0	0	0
150	ST_6	TGCCAGCCCTAT	GGACTACCAGGGTATCTACT	CCTGATGGTCCCATAGATGA	806F_v22	GGACTATCAGGGTATCTATT	2	G/T		G/T	55.2		806Syn_22_ST_3	0	0	0	0	0	0	0	0	0	0	0	0	0	0	0	0	0	0	0	0	0	0	0	0	0	0	0	0	0	0	0	0	0	0	0	0
151	ST_6	TGCCAGCCCTAT	GGACTACCAGGGTATCTACT	CCTGATGGTCCCATAGATGA	806F_v24	GGACTATCAGGGTATCTAGT	2	G/T		G/G	56.8		806Syn_24_ST_3	0	0	0	0	0	0	0	0	0	0	0	0	0	0	0	0	0	0	0	0	0	0	0	0	0	0	0	0	0	0	0	0	0	0	0	0
152	ST_6	TGCCAGCCCTAT	GGACTACCAGGGTATCTACT	CCTGATGGTCCCATAGATGA	806F_v27	GGACTATCAGGGAATCTAAT	3	G/T	A/A	G/A	55.8		806Syn_27_ST_3	0	0	0	0	0	0	0	0	0	0	0	0	0	0	0	0	0	0	0	0	0	0	0	0	0	0	0	0	0	0	0	0	0	0	0	0
153	ST_6	TGCCAGCCCTAT	GGACTACCAGGGTATCTACT	CCTGATGGTCCCATAGATGA	806F_v31	GGACTATCAGGGGATCTAAT	3	G/T	A/G	G/A	57.5		806Syn_31_ST_3	0	0	0	0	0	0	0	0	0	0	0	0	0	0	0	0	0	0	0	0	0	0	0	0	0	0	0	0	0	0	0	0	0	0	0	0
154	ST_6	TGCCAGCCCTAT	GGACTACCAGGGTATCTACT	CCTGATGGTCCCATAGATGA	806F_v35	GGACTAACAGGGCATCTAAT	3	G/A	A/C	G/A	58.9		806Syn_35_ST_3	0	0	0	0	0	0	0	0	0	0	0	0	0	0	0	0	0	0	0	0	0	0	0	0	0	0	0	0	0	0	0	0	0	0	0	0
155	ST_6	TGCCAGCCCTAT	GGACTACCAGGGTATCTACT	CCTGATGGTCCCATAGATGA	806F_v37	GGACTAACAGGGTATCTACT	1	G/A			57.3		806Syn_37_ST_3	0	0	0	0	0	0	0	0	0	0	0	0	0	0	0	0	0	0	0	0	0	0	0	0	0	0	0	0	0	0	0	0	0	0	0	0
156	ST_6	TGCCAGCCCTAT	GGACTACCAGGGTATCTACT	CCTGATGGTCCCATAGATGA	806F_v38	GGACTAACAGGGTATCTATT	2	G/A		G/T	55.7		806Syn_38_ST_3	0	0	0	0	1	0	0	0	0	0	0	0	0	0	0	0	0	0	0	0	0	0	0	0	0	0	0	0	0	0	0	0	0	0	0	0
157	ST_6	TGCCAGCCCTAT	GGACTACCAGGGTATCTACT	CCTGATGGTCCCATAGATGA	806F_v40	GGACTAACAGGGTATCTAGT	2	G/A		G/G	57.3		806Syn_40_ST_3	0	0	0	0	0	0	0	0	0	0	0	0	0	0	0	0	0	0	0	0	0	0	0	0	0	0	0	0	0	0	0	0	0	0	0	0
158	ST_6	TGCCAGCCCTAT	GGACTACCAGGGTATCTACT	CCTGATGGTCCCATAGATGA	806F_v43	GGACTAACAGGGAATCTAAT	3	G/A	A/A	G/A	56.2		806Syn_43_ST_3	0	0	0	0	0	0	0	0	0	0	0	0	0	0	0	0	0	0	0	0	0	0	0	0	0	0	0	0	0	0	0	0	0	0	0	0
159	ST_6	TGCCAGCCCTAT	GGACTACCAGGGTATCTACT	CCTGATGGTCCCATAGATGA	806F_v47	GGACTAACAGGGGATCTAAT	3	G/A	A/G	G/A	58		806Syn_47_ST_3	0	0	0	0	0	0	0	0	0	0	0	0	0	0	0	0	0	0	0	0	0	0	0	0	0	0	0	0	0	0	0	0	0	0	0	0
160	ST_6	TGCCAGCCCTAT	GGACTACCAGGGTATCTACT	CCTGATGGTCCCATAGATGA	806F_v51	GGACTAGCAGGGCATCTAAT	3	G/G	A/C	G/A	60.9		806Syn_51_ST_3	0	0	0	0	0	0	0	0	0	0	0	0	0	0	0	0	0	0	0	0	0	0	0	0	0	0	0	0	0	0	0	0	0	0	0	0
161	ST_6	TGCCAGCCCTAT	GGACTACCAGGGTATCTACT	CCTGATGGTCCCATAGATGA	806F_v53	GGACTAGCAGGGTATCTACT	1	G/G			59.4		806Syn_53_ST_3	0	0	0	0	0	0	0	0	0	0	0	0	0	0	0	0	0	0	0	0	0	0	0	0	0	0	0	0	0	0	0	0	0	0	0	0
162	ST_6	TGCCAGCCCTAT	GGACTACCAGGGTATCTACT	CCTGATGGTCCCATAGATGA	806F_v54	GGACTAGCAGGGTATCTATT	2	G/G		G/T	57.8		806Syn_54_ST_3	0	0	0	0	0	0	0	0	0	0	0	0	0	0	0	0	0	0	0	0	0	0	0	0	0	0	0	0	0	0	0	0	0	0	0	0
163	ST_6	TGCCAGCCCTAT	GGACTACCAGGGTATCTACT	CCTGATGGTCCCATAGATGA	806F_v56	GGACTAGCAGGGTATCTAGT	2	G/G		G/G	59.4		806Syn_56_ST_3	0	0	0	0	0	0	0	0	0	0	0	0	0	0	0	0	0	0	0	0	0	0	0	0	0	0	0	0	0	0	0	0	0	0	0	0
164	ST_6	TGCCAGCCCTAT	GGACTACCAGGGTATCTACT	CCTGATGGTCCCATAGATGA	806F_v59	GGACTAGCAGGGAATCTAAT	3	G/G	A/A	G/A	58.3		806Syn_59_ST_3	0	0	0	0	0	0	0	0	0	0	0	0	0	0	0	0	0	0	0	0	0	0	0	0	0	0	0	0	0	0	0	0	0	0	0	0
165	ST_6	TGCCAGCCCTAT	GGACTACCAGGGTATCTACT	CCTGATGGTCCCATAGATGA	806F_v63	GGACTAGCAGGGGATCTAAT	3	G/G	A/G	G/A	60.1		806Syn_63_ST_3	0	0	0	0	0	0	0	0	0	0	0	0	0	0	0	0	0	0	0	0	0	0	0	0	0	0	0	0	0	0	0	0	0	0	0	0
166	ST_6	TGCCAGCCCTAT	GGACTACCAGGGTATCTACT	CCTGATGGTCCCATAGATGA	806F_v17	GGACTATCAGGGCATCTACT	2	G/T	A/C		60		806Syn_17_ST_3	0	0	0	0	0	0	0	0	0	0	0	0	0	0	0	0	0	0	0	0	0	0	0	0	0	0	0	0	0	0	0	0	0	0	0	0
167	ST_6	TGCCAGCCCTAT	GGACTACCAGGGTATCTACT	CCTGATGGTCCCATAGATGA	806F_v18	GGACTATCAGGGCATCTATT	3	G/T	A/C	G/T	58.4		806Syn_18_ST_3	0	0	0	0	0	0	0	0	0	0	0	0	0	0	0	0	0	0	0	0	0	0	0	0	0	0	0	0	0	0	0	0	0	0	0	0
168	ST_6	TGCCAGCCCTAT	GGACTACCAGGGTATCTACT	CCTGATGGTCCCATAGATGA	806F_v20	GGACTATCAGGGCATCTAGT	3	G/T	A/C	G/G	60		806Syn_20_ST_3	0	0	0	0	0	0	0	0	0	0	0	0	0	0	0	0	0	0	0	0	0	0	0	0	0	0	0	0	0	0	0	0	0	0	0	0
169	ST_6	TGCCAGCCCTAT	GGACTACCAGGGTATCTACT	CCTGATGGTCCCATAGATGA	806F_v25	GGACTATCAGGGAATCTACT	2	G/T	A/A		57.4		806Syn_25_ST_3	0	0	0	0	0	0	0	0	0	0	0	0	0	0	0	0	0	0	0	0	0	0	0	0	0	0	0	0	0	0	0	0	0	0	0	0
170	ST_6	TGCCAGCCCTAT	GGACTACCAGGGTATCTACT	CCTGATGGTCCCATAGATGA	806F_v26	GGACTATCAGGGAATCTATT	3	G/T	A/A	G/T	55.8		806Syn_26_ST_3	0	0	0	0	0	0	0	0	0	0	0	0	0	0	0	0	0	0	0	0	0	0	0	0	0	0	0	0	0	0	0	0	0	0	0	0
171	ST_6	TGCCAGCCCTAT	GGACTACCAGGGTATCTACT	CCTGATGGTCCCATAGATGA	806F_v28	GGACTATCAGGGAATCTAGT	3	G/T	A/A	G/G	57.4		806Syn_28_ST_3	0	0	0	0	0	0	0	0	0	0	0	0	0	0	0	0	0	0	0	0	0	0	0	0	0	0	0	0	0	0	0	0	0	0	0	0
172	ST_6	TGCCAGCCCTAT	GGACTACCAGGGTATCTACT	CCTGATGGTCCCATAGATGA	806F_v29	GGACTATCAGGGGATCTACT	2	G/T	A/G		59.2		806Syn_29_ST_3	0	0	0	0	0	0	0	0	0	0	0	0	0	0	0	0	0	0	0	0	0	0	0	0	0	0	0	0	0	0	0	0	0	0	0	0
173	ST_6	TGCCAGCCCTAT	GGACTACCAGGGTATCTACT	CCTGATGGTCCCATAGATGA	806F_v30	GGACTATCAGGGGATCTATT	3	G/T	A/G	G/T	57.5		806Syn_30_ST_3	0	0	0	0	0	0	0	0	0	0	0	0	0	0	0	0	0	0	0	0	0	0	0	0	0	0	0	0	0	0	0	0	0	0	0	0
174	ST_6	TGCCAGCCCTAT	GGACTACCAGGGTATCTACT	CCTGATGGTCCCATAGATGA	806F_v32	GGACTATCAGGGGATCTAGT	3	G/T	A/G	G/G	59.2		806Syn_32_ST_3	0	0	0	0	0	0	0	0	0	0	0	0	0	0	0	0	0	0	0	0	0	0	0	0	0	0	0	0	0	0	0	0	0	0	0	0
175	ST_6	TGCCAGCCCTAT	GGACTACCAGGGTATCTACT	CCTGATGGTCCCATAGATGA	806F_v33	GGACTAACAGGGCATCTACT	2	G/A	A/C		60.5		806Syn_33_ST_3	0	0	0	0	0	0	0	0	0	0	0	0	0	0	0	0	0	0	0	0	0	0	0	0	0	0	0	0	0	0	0	0	0	0	0	0
176	ST_6	TGCCAGCCCTAT	GGACTACCAGGGTATCTACT	CCTGATGGTCCCATAGATGA	806F_v34	GGACTAACAGGGCATCTATT	3	G/A	A/C	G/T	58.9		806Syn_34_ST_3	0	0	0	0	0	0	0	0	0	0	0	0	0	0	0	0	0	0	0	0	0	0	0	0	0	0	0	0	0	0	0	0	0	0	0	0
177	ST_6	TGCCAGCCCTAT	GGACTACCAGGGTATCTACT	CCTGATGGTCCCATAGATGA	806F_v36	GGACTAACAGGGCATCTAGT	3	G/A	A/C	G/G	60.5		806Syn_36_ST_3	0	0	0	0	0	0	0	0	0	0	0	0	0	0	0	0	0	0	0	0	0	0	0	0	0	0	0	0	0	0	0	0	0	0	0	0
178	ST_6	TGCCAGCCCTAT	GGACTACCAGGGTATCTACT	CCTGATGGTCCCATAGATGA	806F_v41	GGACTAACAGGGAATCTACT	2	G/A	A/A		57.9		806Syn_41_ST_3	0	0	0	0	0	0	0	0	0	0	0	0	0	0	0	0	0	0	0	0	0	0	0	0	0	0	0	0	0	0	0	0	0	0	0	0
179	ST_6	TGCCAGCCCTAT	GGACTACCAGGGTATCTACT	CCTGATGGTCCCATAGATGA	806F_v42	GGACTAACAGGGAATCTATT	3	G/A	A/A	G/T	56.2		806Syn_42_ST_3	0	0	0	0	0	0	0	0	0	0	0	0	0	0	0	0	0	0	0	0	0	0	0	0	0	0	0	0	0	0	0	0	0	0	0	0
180	ST_6	TGCCAGCCCTAT	GGACTACCAGGGTATCTACT	CCTGATGGTCCCATAGATGA	806F_v44	GGACTAACAGGGAATCTAGT	3	G/A	A/A	G/G	57.9		806Syn_44_ST_3	0	0	0	0	0	0	0	0	0	0	0	0	0	0	0	0	0	0	0	0	0	0	0	0	0	0	0	0	0	0	0	0	0	0	0	0
181	ST_6	TGCCAGCCCTAT	GGACTACCAGGGTATCTACT	CCTGATGGTCCCATAGATGA	806F_v45	GGACTAACAGGGGATCTACT	2	G/A	A/G		59.7		806Syn_45_ST_3	0	0	0	0	0	0	0	0	0	0	0	0	0	0	0	0	0	0	0	0	0	0	0	0	0	0	0	0	0	0	0	0	0	0	0	0
182	ST_6	TGCCAGCCCTAT	GGACTACCAGGGTATCTACT	CCTGATGGTCCCATAGATGA	806F_v46	GGACTAACAGGGGATCTATT	3	G/A	A/G	G/T	58		806Syn_46_ST_3	0	0	0	0	0	0	0	0	0	0	0	0	0	0	0	0	0	0	0	0	0	0	0	0	0	0	0	0	0	0	0	0	0	0	0	0
183	ST_6	TGCCAGCCCTAT	GGACTACCAGGGTATCTACT	CCTGATGGTCCCATAGATGA	806F_v48	GGACTAACAGGGGATCTAGT	3	G/A	A/G	G/G	59.7		806Syn_48_ST_3	0	0	0	0	0	0	0	0	0	0	0	0	0	0	0	0	0	0	0	0	0	0	0	0	0	0	0	0	0	0	0	0	0	0	0	0
184	ST_6	TGCCAGCCCTAT	GGACTACCAGGGTATCTACT	CCTGATGGTCCCATAGATGA	806F_v49	GGACTAGCAGGGCATCTACT	2	G/G	A/C		62.6		806Syn_49_ST_3	0	0	0	0	0	0	0	0	0	0	0	0	0	0	0	0	0	0	0	0	0	0	0	0	0	0	0	0	0	0	0	0	0	0	0	0
185	ST_6	TGCCAGCCCTAT	GGACTACCAGGGTATCTACT	CCTGATGGTCCCATAGATGA	806F_v50	GGACTAGCAGGGCATCTATT	3	G/G	A/C	G/T	60.9		806Syn_50_ST_3	0	0	0	0	0	0	0	0	0	0	0	0	0	0	0	0	0	0	0	0	0	0	0	0	0	0	0	0	0	0	0	0	0	0	0	0
186	ST_6	TGCCAGCCCTAT	GGACTACCAGGGTATCTACT	CCTGATGGTCCCATAGATGA	806F_v52	GGACTAGCAGGGCATCTAGT	3	G/G	A/C	G/G	62.6		806Syn_52_ST_3	0	0	0	0	0	0	0	0	0	0	0	0	0	0	0	0	0	0	0	0	0	0	0	0	0	0	0	0	0	0	0	0	0	0	0	0
187	ST_6	TGCCAGCCCTAT	GGACTACCAGGGTATCTACT	CCTGATGGTCCCATAGATGA	806F_v57	GGACTAGCAGGGAATCTACT	2	G/G	A/A		60		806Syn_57_ST_3	0	0	0	0	0	0	0	0	0	0	0	0	0	0	0	0	0	0	0	0	0	0	0	0	0	0	0	0	0	0	0	0	0	0	0	0
188	ST_6	TGCCAGCCCTAT	GGACTACCAGGGTATCTACT	CCTGATGGTCCCATAGATGA	806F_v58	GGACTAGCAGGGAATCTATT	3	G/G	A/A	G/T	58.3		806Syn_58_ST_3	0	0	0	0	0	0	0	0	0	0	0	0	0	0	0	0	0	0	0	0	0	0	0	0	0	0	0	0	0	0	0	0	0	0	0	0
189	ST_6	TGCCAGCCCTAT	GGACTACCAGGGTATCTACT	CCTGATGGTCCCATAGATGA	806F_v60	GGACTAGCAGGGAATCTAGT	3	G/G	A/A	G/G	60		806Syn_60_ST_3	0	0	0	0	0	0	0	0	0	0	0	0	0	0	0	0	0	0	0	0	0	0	0	0	0	0	0	0	0	0	0	0	0	0	0	0
190	ST_6	TGCCAGCCCTAT	GGACTACCAGGGTATCTACT	CCTGATGGTCCCATAGATGA	806F_v61	GGACTAGCAGGGGATCTACT	2	G/G	A/G		61.7		806Syn_61_ST_3	0	0	0	0	0	0	0	0	0	0	0	0	0	0	0	0	0	0	0	0	0	0	0	0	0	0	0	0	0	0	0	0	0	0	0	0
191	ST_6	TGCCAGCCCTAT	GGACTACCAGGGTATCTACT	CCTGATGGTCCCATAGATGA	806F_v62	GGACTAGCAGGGGATCTATT	3	G/G	A/G	G/T	60.1		806Syn_62_ST_3	0	0	0	0	0	0	0	0	0	0	0	0	0	0	0	0	0	0	0	0	0	0	0	0	0	0	0	0	0	0	0	0	0	0	0	0
192	ST_6	TGCCAGCCCTAT	GGACTACCAGGGTATCTACT	CCTGATGGTCCCATAGATGA	806F_v64	GGACTAGCAGGGGATCTAGT	3	G/G	A/G	G/G	61.7		806Syn_64_ST_3	0	0	0	0	0	0	0	0	0	0	0	0	0	0	0	0	0	0	0	0	0	0	0	0	0	0	0	0	0	0	0	0	0	0	0	0
193	ST_7	ACATCGCTCGTC	GGACTACCAGGGTATCTATT	CCTGATGGTCCCATAGATAA	806F_v1	GGACTACCAGGGTATCTAAT	1			A/A	57.4		806Syn_1_ST_4	1	0	2	0	0	0	1	0	0	0	0	1	0	0	0	0	0	1	0	0	0	0	0	0	1	0	0	0	0	1	0	0	0	1	0	0
194	ST_7	ACATCGCTCGTC	GGACTACCAGGGTATCTATT	CCTGATGGTCCCATAGATAA	806F_v4	GGACTACCAGGGCATCTAAT	2		A/C	A/A	60.6		806Syn_4_ST_4	0	0	0	0	0	0	0	0	0	0	0	0	0	0	0	0	0	0	0	0	0	0	0	0	0	0	0	0	0	0	0	0	0	0	0	0
195	ST_7	ACATCGCTCGTC	GGACTACCAGGGTATCTATT	CCTGATGGTCCCATAGATAA	806F_v6	GGACTACCAGGGTATCTACT	1			A/C	59.1		806Syn_6_ST_4	0	0	0	0	0	0	0	0	0	0	0	0	0	0	0	1	0	0	0	0	0	0	1	0	0	0	0	0	0	0	0	0	0	0	0	0
196	ST_7	ACATCGCTCGTC	GGACTACCAGGGTATCTATT	CCTGATGGTCCCATAGATAA	806F_v7	GGACTACCAGGGTATCTATT	0				57.4		806Syn_7_ST_4	0	0	1	0	0	0	0	0	0	0	0	0	0	0	0	0	0	0	1	0	1	0	0	0	4	0	0	1	1	0	0	0	0	0	0	0
197	ST_7	ACATCGCTCGTC	GGACTACCAGGGTATCTATT	CCTGATGGTCCCATAGATAA	806F_v8	GGACTACCAGGGTATCTAGT	1			A/G	59.1		806Syn_8_ST_4	0	0	0	0	0	0	0	0	0	0	0	0	0	0	0	0	0	0	0	0	0	0	0	0	0	0	0	0	0	0	0	0	0	0	0	0
198	ST_7	ACATCGCTCGTC	GGACTACCAGGGTATCTATT	CCTGATGGTCCCATAGATAA	806F_v11	GGACTACCAGGGAATCTAAT	2		A/A	A/A	58		806Syn_11_ST_4	0	0	0	0	0	0	0	0	0	0	0	0	0	0	0	0	0	0	0	0	0	0	0	0	0	0	0	0	0	0	0	0	0	0	0	0
199	ST_7	ACATCGCTCGTC	GGACTACCAGGGTATCTATT	CCTGATGGTCCCATAGATAA	806F_v15	GGACTACCAGGGGATCTAAT	2		A/G	A/A	59.8		806Syn_15_ST_4	0	0	0	0	0	0	0	0	0	0	0	0	0	0	0	0	0	0	0	0	0	0	0	0	0	1	0	0	0	0	0	0	0	0	0	0
200	ST_7	ACATCGCTCGTC	GGACTACCAGGGTATCTATT	CCTGATGGTCCCATAGATAA	806F_v23	GGACTATCAGGGTATCTAAT	2	G/T		A/A	55.2		806Syn_23_ST_4	0	0	1	0	0	0	0	0	0	0	0	0	0	0	0	0	0	0	0	0	0	0	0	0	0	0	0	0	0	0	0	0	0	0	0	0
201	ST_7	ACATCGCTCGTC	GGACTACCAGGGTATCTATT	CCTGATGGTCCCATAGATAA	806F_v39	GGACTAACAGGGTATCTAAT	2	G/A		A/A	55.7		806Syn_39_ST_4	0	0	0	0	0	0	0	0	0	0	0	0	0	0	0	0	0	0	0	0	0	0	0	0	0	0	0	0	0	0	0	0	0	0	0	0
202	ST_7	ACATCGCTCGTC	GGACTACCAGGGTATCTATT	CCTGATGGTCCCATAGATAA	806F_v55	GGACTAGCAGGGTATCTAAT	2	G/G		A/A	57.8		806Syn_55_ST_4	0	0	0	0	0	0	0	0	0	0	0	0	1	0	0	0	0	0	0	0	0	0	0	0	0	0	0	0	0	1	0	0	0	0	0	0
203	ST_7	ACATCGCTCGTC	GGACTACCAGGGTATCTATT	CCTGATGGTCCCATAGATAA	806F_v2	GGACTACCAGGGCATCTACT	2		A/C	A/C	62.3		806Syn_2_ST_4	0	0	0	0	0	0	0	0	0	0	0	0	0	0	0	0	0	0	0	0	0	0	0	0	0	0	0	0	0	0	0	0	0	0	0	0
204	ST_7	ACATCGCTCGTC	GGACTACCAGGGTATCTATT	CCTGATGGTCCCATAGATAA	806F_v3	GGACTACCAGGGCATCTATT	1		A/C		60.6		806Syn_3_ST_4	0	0	0	0	0	0	0	0	0	0	0	0	0	0	0	0	0	0	0	0	0	0	0	0	0	0	0	0	0	0	0	0	0	0	0	0
205	ST_7	ACATCGCTCGTC	GGACTACCAGGGTATCTATT	CCTGATGGTCCCATAGATAA	806F_v5	GGACTACCAGGGCATCTAGT	2		A/C	A/G	62.3		806Syn_5_ST_4	0	0	0	0	0	0	0	0	0	0	0	0	0	0	0	0	0	0	0	0	0	0	0	0	0	0	0	0	0	0	0	0	0	0	0	0
206	ST_7	ACATCGCTCGTC	GGACTACCAGGGTATCTATT	CCTGATGGTCCCATAGATAA	806F_v9	GGACTACCAGGGAATCTACT	2		A/A	A/C	59.7		806Syn_9_ST_4	0	0	0	0	0	0	0	0	0	0	0	0	0	0	0	0	0	0	0	0	0	0	0	0	0	0	0	0	0	0	0	0	0	0	0	0
207	ST_7	ACATCGCTCGTC	GGACTACCAGGGTATCTATT	CCTGATGGTCCCATAGATAA	806F_v10	GGACTACCAGGGAATCTATT	1		A/A		58		806Syn_10_ST_4	0	0	0	0	0	0	0	0	0	0	0	0	0	0	0	0	0	0	0	0	0	0	0	0	0	0	0	0	0	1	0	0	0	0	0	0
208	ST_7	ACATCGCTCGTC	GGACTACCAGGGTATCTATT	CCTGATGGTCCCATAGATAA	806F_v12	GGACTACCAGGGAATCTAGT	2		A/A	A/G	59.7		806Syn_12_ST_4	0	0	0	0	0	0	0	0	0	0	0	0	0	0	0	0	0	0	0	0	0	0	0	0	0	0	0	0	0	0	0	0	0	0	0	0
209	ST_7	ACATCGCTCGTC	GGACTACCAGGGTATCTATT	CCTGATGGTCCCATAGATAA	806F_v13	GGACTACCAGGGGATCTACT	2		A/G	A/C	61.5		806Syn_13_ST_4	0	0	0	0	0	0	0	0	0	0	0	0	0	0	0	0	0	0	0	0	0	0	0	0	0	0	0	0	0	0	0	0	0	0	0	0
210	ST_7	ACATCGCTCGTC	GGACTACCAGGGTATCTATT	CCTGATGGTCCCATAGATAA	806F_v14	GGACTACCAGGGGATCTATT	1		A/G		59.8		806Syn_14_ST_4	0	0	0	0	0	0	0	0	0	0	0	0	0	2	0	0	0	0	0	0	0	0	0	0	0	0	0	0	0	0	0	0	0	0	0	0
211	ST_7	ACATCGCTCGTC	GGACTACCAGGGTATCTATT	CCTGATGGTCCCATAGATAA	806F_v16	GGACTACCAGGGGATCTAGT	2		A/G	A/G	61.5		806Syn_16_ST_4	0	0	0	0	0	0	0	0	0	0	0	0	0	0	0	0	0	0	0	0	0	0	0	0	0	0	0	0	0	0	0	0	0	0	0	0
212	ST_7	ACATCGCTCGTC	GGACTACCAGGGTATCTATT	CCTGATGGTCCCATAGATAA	806F_v19	GGACTATCAGGGCATCTAAT	3	G/T	A/C	A/A	58.4		806Syn_19_ST_4	0	0	0	0	0	0	0	0	0	0	0	0	0	0	0	0	0	0	0	0	0	0	0	0	0	0	0	0	0	0	0	0	0	0	0	0
213	ST_7	ACATCGCTCGTC	GGACTACCAGGGTATCTATT	CCTGATGGTCCCATAGATAA	806F_v21	GGACTATCAGGGTATCTACT	2	G/T		A/C	56.8		806Syn_21_ST_4	0	0	0	0	0	0	0	0	0	0	0	0	0	0	0	0	0	0	0	0	0	0	0	0	0	0	0	0	0	0	0	0	0	0	0	0
214	ST_7	ACATCGCTCGTC	GGACTACCAGGGTATCTATT	CCTGATGGTCCCATAGATAA	806F_v22	GGACTATCAGGGTATCTATT	1	G/T			55.2		806Syn_22_ST_4	0	0	0	0	0	0	0	0	0	0	0	0	0	2	0	0	0	0	0	0	0	0	0	0	0	0	0	0	0	0	0	0	0	0	0	0
215	ST_7	ACATCGCTCGTC	GGACTACCAGGGTATCTATT	CCTGATGGTCCCATAGATAA	806F_v24	GGACTATCAGGGTATCTAGT	2	G/T		A/G	56.8		806Syn_24_ST_4	0	0	0	0	0	0	0	0	0	0	0	0	0	0	0	0	0	0	0	0	0	0	0	0	0	0	0	0	0	0	0	0	0	0	0	0
216	ST_7	ACATCGCTCGTC	GGACTACCAGGGTATCTATT	CCTGATGGTCCCATAGATAA	806F_v27	GGACTATCAGGGAATCTAAT	3	G/T	A/A	A/A	55.8		806Syn_27_ST_4	0	0	0	0	0	0	0	0	0	0	0	0	0	0	0	0	0	0	0	0	0	0	0	0	0	0	0	0	0	0	0	0	0	0	0	0
217	ST_7	ACATCGCTCGTC	GGACTACCAGGGTATCTATT	CCTGATGGTCCCATAGATAA	806F_v31	GGACTATCAGGGGATCTAAT	3	G/T	A/G	A/A	57.5		806Syn_31_ST_4	0	0	0	0	0	0	0	0	0	0	0	0	0	0	0	0	0	0	0	0	0	0	0	0	0	0	0	0	0	0	0	0	0	0	0	0
218	ST_7	ACATCGCTCGTC	GGACTACCAGGGTATCTATT	CCTGATGGTCCCATAGATAA	806F_v35	GGACTAACAGGGCATCTAAT	3	G/A	A/C	A/A	58.9		806Syn_35_ST_4	0	0	0	0	0	0	0	0	0	0	0	0	0	0	0	0	0	0	0	0	0	0	0	0	0	0	0	0	0	0	0	0	0	0	0	0
219	ST_7	ACATCGCTCGTC	GGACTACCAGGGTATCTATT	CCTGATGGTCCCATAGATAA	806F_v37	GGACTAACAGGGTATCTACT	2	G/A		A/C	57.3		806Syn_37_ST_4	0	0	0	0	0	0	0	0	0	0	0	0	0	0	0	0	0	0	0	0	0	0	0	0	0	0	0	0	0	0	0	0	0	0	0	0
220	ST_7	ACATCGCTCGTC	GGACTACCAGGGTATCTATT	CCTGATGGTCCCATAGATAA	806F_v38	GGACTAACAGGGTATCTATT	1	G/A			55.7		806Syn_38_ST_4	0	0	0	0	0	0	0	0	0	0	0	0	0	0	0	0	0	0	0	0	0	0	0	0	0	0	0	0	0	0	0	0	0	0	0	0
221	ST_7	ACATCGCTCGTC	GGACTACCAGGGTATCTATT	CCTGATGGTCCCATAGATAA	806F_v40	GGACTAACAGGGTATCTAGT	2	G/A		A/G	57.3		806Syn_40_ST_4	0	0	0	0	0	0	0	0	0	0	0	0	0	0	0	0	0	0	0	0	0	0	0	0	0	0	0	0	0	0	0	0	0	0	0	0
222	ST_7	ACATCGCTCGTC	GGACTACCAGGGTATCTATT	CCTGATGGTCCCATAGATAA	806F_v43	GGACTAACAGGGAATCTAAT	3	G/A	A/A	A/A	56.2		806Syn_43_ST_4	0	0	0	0	0	0	0	0	0	0	0	0	0	0	0	0	0	0	0	0	0	0	0	0	0	0	0	0	0	0	0	0	0	0	0	0
223	ST_7	ACATCGCTCGTC	GGACTACCAGGGTATCTATT	CCTGATGGTCCCATAGATAA	806F_v47	GGACTAACAGGGGATCTAAT	3	G/A	A/G	A/A	58		806Syn_47_ST_4	0	0	0	0	0	0	0	0	0	0	0	0	0	0	0	0	0	0	0	0	0	0	0	0	0	0	0	0	0	0	0	0	0	0	0	0
224	ST_7	ACATCGCTCGTC	GGACTACCAGGGTATCTATT	CCTGATGGTCCCATAGATAA	806F_v51	GGACTAGCAGGGCATCTAAT	3	G/G	A/C	A/A	60.9		806Syn_51_ST_4	0	0	0	0	0	0	0	0	0	0	0	0	0	0	0	0	0	0	0	0	0	0	0	0	0	0	0	0	0	0	0	0	0	0	0	0
225	ST_7	ACATCGCTCGTC	GGACTACCAGGGTATCTATT	CCTGATGGTCCCATAGATAA	806F_v53	GGACTAGCAGGGTATCTACT	2	G/G		A/C	59.4		806Syn_53_ST_4	0	0	0	0	0	0	0	0	0	0	0	0	0	0	0	0	0	0	0	0	0	0	0	0	0	0	0	0	0	0	0	0	0	0	0	0
226	ST_7	ACATCGCTCGTC	GGACTACCAGGGTATCTATT	CCTGATGGTCCCATAGATAA	806F_v54	GGACTAGCAGGGTATCTATT	1	G/G			57.8		806Syn_54_ST_4	0	0	0	0	0	0	0	0	0	0	0	0	0	0	0	0	0	0	0	0	0	0	0	0	0	0	0	0	0	0	0	0	0	0	0	0
227	ST_7	ACATCGCTCGTC	GGACTACCAGGGTATCTATT	CCTGATGGTCCCATAGATAA	806F_v56	GGACTAGCAGGGTATCTAGT	2	G/G		A/G	59.4		806Syn_56_ST_4	0	0	0	0	0	0	0	0	0	0	0	0	0	0	0	0	0	0	0	0	0	0	0	0	0	0	0	0	0	0	0	0	0	0	0	0
228	ST_7	ACATCGCTCGTC	GGACTACCAGGGTATCTATT	CCTGATGGTCCCATAGATAA	806F_v59	GGACTAGCAGGGAATCTAAT	3	G/G	A/A	A/A	58.3		806Syn_59_ST_4	0	0	0	0	0	0	0	0	0	0	0	0	0	0	0	0	0	0	0	0	0	0	0	0	0	0	0	0	0	0	0	0	0	0	0	0
229	ST_7	ACATCGCTCGTC	GGACTACCAGGGTATCTATT	CCTGATGGTCCCATAGATAA	806F_v63	GGACTAGCAGGGGATCTAAT	3	G/G	A/G	A/A	60.1		806Syn_63_ST_4	0	0	0	0	0	0	0	0	0	0	0	0	0	0	0	0	0	0	0	0	0	0	0	0	0	0	0	0	0	0	0	0	0	0	0	0
230	ST_7	ACATCGCTCGTC	GGACTACCAGGGTATCTATT	CCTGATGGTCCCATAGATAA	806F_v17	GGACTATCAGGGCATCTACT	3	G/T	A/C	A/C	60		806Syn_17_ST_4	0	0	0	0	0	0	0	0	0	0	0	0	0	0	0	0	0	0	0	0	0	0	0	0	0	0	0	0	0	0	0	0	0	0	0	0
231	ST_7	ACATCGCTCGTC	GGACTACCAGGGTATCTATT	CCTGATGGTCCCATAGATAA	806F_v18	GGACTATCAGGGCATCTATT	2	G/T	A/C		58.4		806Syn_18_ST_4	0	0	0	0	0	0	0	0	0	0	0	0	0	0	0	0	0	0	0	0	0	0	0	0	0	0	0	0	0	0	0	0	0	0	0	0
232	ST_7	ACATCGCTCGTC	GGACTACCAGGGTATCTATT	CCTGATGGTCCCATAGATAA	806F_v20	GGACTATCAGGGCATCTAGT	3	G/T	A/C	A/G	60		806Syn_20_ST_4	0	0	0	0	0	0	0	0	0	0	0	0	0	0	0	0	0	0	0	0	0	0	0	0	0	0	0	0	0	0	0	0	0	0	0	0
233	ST_7	ACATCGCTCGTC	GGACTACCAGGGTATCTATT	CCTGATGGTCCCATAGATAA	806F_v25	GGACTATCAGGGAATCTACT	3	G/T	A/A	A/C	57.4		806Syn_25_ST_4	0	0	0	0	0	0	0	0	0	0	0	0	0	0	0	0	0	0	0	0	0	0	0	0	0	0	0	0	0	0	0	0	0	0	0	0
234	ST_7	ACATCGCTCGTC	GGACTACCAGGGTATCTATT	CCTGATGGTCCCATAGATAA	806F_v26	GGACTATCAGGGAATCTATT	2	G/T	A/A		55.8		806Syn_26_ST_4	0	0	0	0	0	0	0	0	0	0	0	0	0	0	0	0	0	0	0	0	0	0	0	0	0	0	0	0	0	0	0	0	0	0	0	0
235	ST_7	ACATCGCTCGTC	GGACTACCAGGGTATCTATT	CCTGATGGTCCCATAGATAA	806F_v28	GGACTATCAGGGAATCTAGT	3	G/T	A/A	A/G	57.4		806Syn_28_ST_4	0	0	0	0	0	0	0	0	0	0	0	0	0	0	0	0	0	0	0	0	0	0	0	0	0	0	0	0	0	0	0	0	0	0	0	0
236	ST_7	ACATCGCTCGTC	GGACTACCAGGGTATCTATT	CCTGATGGTCCCATAGATAA	806F_v29	GGACTATCAGGGGATCTACT	3	G/T	A/G	A/C	59.2		806Syn_29_ST_4	0	0	0	0	0	0	0	0	0	0	0	0	0	0	0	0	0	0	0	0	0	0	0	0	0	0	0	0	0	0	0	0	0	0	0	0
237	ST_7	ACATCGCTCGTC	GGACTACCAGGGTATCTATT	CCTGATGGTCCCATAGATAA	806F_v30	GGACTATCAGGGGATCTATT	2	G/T	A/G		57.5		806Syn_30_ST_4	0	0	0	0	0	0	0	0	0	0	0	0	0	0	0	0	0	0	0	0	0	0	0	0	0	0	0	0	0	0	0	0	0	0	0	0
238	ST_7	ACATCGCTCGTC	GGACTACCAGGGTATCTATT	CCTGATGGTCCCATAGATAA	806F_v32	GGACTATCAGGGGATCTAGT	3	G/T	A/G	A/G	59.2		806Syn_32_ST_4	0	0	0	0	0	0	0	0	0	0	0	0	0	0	0	0	0	0	0	0	0	0	0	0	0	0	0	0	0	0	0	0	0	0	0	0
239	ST_7	ACATCGCTCGTC	GGACTACCAGGGTATCTATT	CCTGATGGTCCCATAGATAA	806F_v33	GGACTAACAGGGCATCTACT	3	G/A	A/C	A/C	60.5		806Syn_33_ST_4	0	0	0	0	0	0	0	0	0	0	0	0	0	0	0	0	0	0	0	0	0	0	0	0	0	0	0	0	0	0	0	0	0	0	0	0
240	ST_7	ACATCGCTCGTC	GGACTACCAGGGTATCTATT	CCTGATGGTCCCATAGATAA	806F_v34	GGACTAACAGGGCATCTATT	2	G/A	A/C		58.9		806Syn_34_ST_4	0	0	0	0	0	0	0	0	0	0	0	0	0	0	0	0	0	0	0	0	0	0	0	0	0	0	0	0	0	0	0	0	0	0	0	0
241	ST_7	ACATCGCTCGTC	GGACTACCAGGGTATCTATT	CCTGATGGTCCCATAGATAA	806F_v36	GGACTAACAGGGCATCTAGT	3	G/A	A/C	A/G	60.5		806Syn_36_ST_4	0	0	0	0	0	0	0	0	0	0	0	0	0	0	0	0	0	0	0	0	0	0	0	0	0	0	0	0	0	0	0	0	0	0	0	0
242	ST_7	ACATCGCTCGTC	GGACTACCAGGGTATCTATT	CCTGATGGTCCCATAGATAA	806F_v41	GGACTAACAGGGAATCTACT	3	G/A	A/A	A/C	57.9		806Syn_41_ST_4	0	0	0	0	0	0	0	0	0	0	0	0	0	0	0	0	0	0	0	0	0	0	0	0	0	0	0	0	0	0	0	0	0	0	0	0
243	ST_7	ACATCGCTCGTC	GGACTACCAGGGTATCTATT	CCTGATGGTCCCATAGATAA	806F_v42	GGACTAACAGGGAATCTATT	2	G/A	A/A		56.2		806Syn_42_ST_4	0	0	0	0	0	0	0	0	0	0	0	0	0	0	0	0	0	0	0	0	0	0	0	0	0	0	0	0	0	0	0	0	0	0	0	0
244	ST_7	ACATCGCTCGTC	GGACTACCAGGGTATCTATT	CCTGATGGTCCCATAGATAA	806F_v44	GGACTAACAGGGAATCTAGT	3	G/A	A/A	A/G	57.9		806Syn_44_ST_4	0	0	0	0	0	0	0	0	0	0	0	0	0	0	0	0	0	0	0	0	0	0	0	0	0	0	0	0	0	0	0	0	0	0	0	0
245	ST_7	ACATCGCTCGTC	GGACTACCAGGGTATCTATT	CCTGATGGTCCCATAGATAA	806F_v45	GGACTAACAGGGGATCTACT	3	G/A	A/G	A/C	59.7		806Syn_45_ST_4	0	0	0	0	0	0	0	0	0	0	0	0	0	0	0	0	0	0	0	0	0	0	0	0	0	0	0	0	0	0	0	0	0	0	0	0
246	ST_7	ACATCGCTCGTC	GGACTACCAGGGTATCTATT	CCTGATGGTCCCATAGATAA	806F_v46	GGACTAACAGGGGATCTATT	2	G/A	A/G		58		806Syn_46_ST_4	0	0	0	0	0	0	0	0	0	0	0	0	0	0	0	0	0	0	0	0	0	0	0	0	0	0	0	0	0	0	0	0	0	0	0	0
247	ST_7	ACATCGCTCGTC	GGACTACCAGGGTATCTATT	CCTGATGGTCCCATAGATAA	806F_v48	GGACTAACAGGGGATCTAGT	3	G/A	A/G	A/G	59.7		806Syn_48_ST_4	0	0	0	0	0	0	0	0	0	0	0	0	0	0	0	0	0	0	0	0	0	0	0	0	0	0	0	0	0	0	0	0	0	0	0	0
248	ST_7	ACATCGCTCGTC	GGACTACCAGGGTATCTATT	CCTGATGGTCCCATAGATAA	806F_v49	GGACTAGCAGGGCATCTACT	3	G/G	A/C	A/C	62.6		806Syn_49_ST_4	0	0	0	0	0	0	0	0	0	0	0	0	0	0	0	0	0	0	0	0	0	0	0	0	0	0	0	0	0	0	0	0	0	0	0	0
249	ST_7	ACATCGCTCGTC	GGACTACCAGGGTATCTATT	CCTGATGGTCCCATAGATAA	806F_v50	GGACTAGCAGGGCATCTATT	2	G/G	A/C		60.9		806Syn_50_ST_4	0	0	0	0	0	0	0	0	0	0	0	0	0	0	0	0	0	0	0	0	0	0	0	0	0	0	0	0	0	0	0	0	0	0	0	0
250	ST_7	ACATCGCTCGTC	GGACTACCAGGGTATCTATT	CCTGATGGTCCCATAGATAA	806F_v52	GGACTAGCAGGGCATCTAGT	3	G/G	A/C	A/G	62.6		806Syn_52_ST_4	0	0	0	0	0	0	0	0	0	0	0	0	0	0	0	0	0	0	0	0	0	0	0	0	0	0	0	0	0	0	0	0	0	0	0	0
251	ST_7	ACATCGCTCGTC	GGACTACCAGGGTATCTATT	CCTGATGGTCCCATAGATAA	806F_v57	GGACTAGCAGGGAATCTACT	3	G/G	A/A	A/C	60		806Syn_57_ST_4	0	0	0	0	0	0	0	0	0	0	0	0	0	0	0	0	0	0	0	0	0	0	0	0	0	0	0	0	0	0	0	0	0	0	0	0
252	ST_7	ACATCGCTCGTC	GGACTACCAGGGTATCTATT	CCTGATGGTCCCATAGATAA	806F_v58	GGACTAGCAGGGAATCTATT	2	G/G	A/A		58.3		806Syn_58_ST_4	0	0	0	0	0	0	0	0	0	0	0	0	0	0	0	0	0	0	0	0	0	0	0	0	0	0	0	0	0	0	0	0	0	0	0	0
253	ST_7	ACATCGCTCGTC	GGACTACCAGGGTATCTATT	CCTGATGGTCCCATAGATAA	806F_v60	GGACTAGCAGGGAATCTAGT	3	G/G	A/A	A/G	60		806Syn_60_ST_4	0	0	0	0	0	0	0	0	0	0	0	0	0	0	0	0	0	0	0	0	0	0	0	0	0	0	0	0	0	0	0	0	0	0	0	0
254	ST_7	ACATCGCTCGTC	GGACTACCAGGGTATCTATT	CCTGATGGTCCCATAGATAA	806F_v61	GGACTAGCAGGGGATCTACT	3	G/G	A/G	A/C	61.7		806Syn_61_ST_4	0	0	0	0	0	0	0	0	0	0	0	0	0	0	0	0	0	0	0	0	0	0	0	0	0	0	0	0	0	0	0	0	0	0	0	0
255	ST_7	ACATCGCTCGTC	GGACTACCAGGGTATCTATT	CCTGATGGTCCCATAGATAA	806F_v62	GGACTAGCAGGGGATCTATT	2	G/G	A/G		60.1		806Syn_62_ST_4	0	0	0	0	0	0	0	0	0	0	0	0	0	0	0	0	0	0	0	0	0	0	0	0	0	0	0	0	0	0	0	0	0	0	0	0
256	ST_7	ACATCGCTCGTC	GGACTACCAGGGTATCTATT	CCTGATGGTCCCATAGATAA	806F_v64	GGACTAGCAGGGGATCTAGT	3	G/G	A/G	A/G	61.7		806Syn_64_ST_4	0	0	0	0	0	0	0	0	0	0	0	0	0	0	0	0	0	0	0	0	0	0	0	0	0	0	0	0	0	0	0	0	0	0	0	0
257	ST_8	GAACCTTTCCCG	GGACTACCAGGGTATCTAGT	CCTGATGGTCCCATAGATCA	806F_v1	GGACTACCAGGGTATCTAAT	1			C/A	57.4		806Syn_1_ST_5	0	0	1	0	0	1	1	1	0	2	0	7	0	0	0	0	0	0	0	0	1	0	0	0	2	0	0	0	0	0	1	0	1	0	0	0
258	ST_8	GAACCTTTCCCG	GGACTACCAGGGTATCTAGT	CCTGATGGTCCCATAGATCA	806F_v4	GGACTACCAGGGCATCTAAT	2		A/C	C/A	60.6		806Syn_4_ST_5	0	0	0	0	0	0	0	0	0	0	0	0	0	0	0	0	0	0	0	0	1	0	0	0	0	0	0	0	0	0	0	0	0	0	0	0
259	ST_8	GAACCTTTCCCG	GGACTACCAGGGTATCTAGT	CCTGATGGTCCCATAGATCA	806F_v6	GGACTACCAGGGTATCTACT	1			C/C	59.1		806Syn_6_ST_5	0	0	0	0	0	0	0	0	0	0	0	0	0	0	0	0	0	1	0	0	0	0	0	0	0	0	0	0	1	0	0	0	0	0	1	0
260	ST_8	GAACCTTTCCCG	GGACTACCAGGGTATCTAGT	CCTGATGGTCCCATAGATCA	806F_v7	GGACTACCAGGGTATCTATT	1			C/T	57.4		806Syn_7_ST_5	0	0	0	0	0	0	0	0	0	0	0	0	0	0	0	1	0	0	0	0	0	0	0	0	0	0	0	0	0	0	0	1	1	0	0	0
261	ST_8	GAACCTTTCCCG	GGACTACCAGGGTATCTAGT	CCTGATGGTCCCATAGATCA	806F_v8	GGACTACCAGGGTATCTAGT	0				59.1		806Syn_8_ST_5	0	0	0	0	0	0	0	0	0	1	0	0	0	0	0	0	0	0	0	0	0	0	0	0	0	0	0	0	0	0	0	0	0	0	0	0
262	ST_8	GAACCTTTCCCG	GGACTACCAGGGTATCTAGT	CCTGATGGTCCCATAGATCA	806F_v11	GGACTACCAGGGAATCTAAT	2		A/A	C/A	58		806Syn_11_ST_5	0	0	0	0	0	0	0	0	0	0	0	0	0	0	0	0	0	0	0	0	0	0	1	0	0	0	0	0	0	0	0	0	0	0	0	0
263	ST_8	GAACCTTTCCCG	GGACTACCAGGGTATCTAGT	CCTGATGGTCCCATAGATCA	806F_v15	GGACTACCAGGGGATCTAAT	2		A/G	C/A	59.8		806Syn_15_ST_5	0	0	0	0	0	0	0	0	0	0	0	0	0	0	0	0	0	0	0	0	0	0	0	0	0	0	0	0	0	0	0	0	0	0	0	0
264	ST_8	GAACCTTTCCCG	GGACTACCAGGGTATCTAGT	CCTGATGGTCCCATAGATCA	806F_v23	GGACTATCAGGGTATCTAAT	2	G/T		C/A	55.2		806Syn_23_ST_5	0	0	0	0	0	0	0	0	0	0	0	0	0	0	0	0	0	0	0	0	0	0	0	0	0	0	0	0	0	0	0	0	0	0	0	0
265	ST_8	GAACCTTTCCCG	GGACTACCAGGGTATCTAGT	CCTGATGGTCCCATAGATCA	806F_v39	GGACTAACAGGGTATCTAAT	2	G/A		C/A	55.7		806Syn_39_ST_5	0	0	1	0	0	0	0	0	0	0	0	0	0	0	0	0	0	0	0	0	0	0	0	0	0	0	0	1	0	0	1	0	0	0	0	0
266	ST_8	GAACCTTTCCCG	GGACTACCAGGGTATCTAGT	CCTGATGGTCCCATAGATCA	806F_v55	GGACTAGCAGGGTATCTAAT	2	G/G		C/A	57.8		806Syn_55_ST_5	0	0	0	0	0	0	0	0	0	1	0	0	0	1	0	0	0	0	0	0	0	0	0	0	0	0	0	0	0	0	0	0	0	0	0	0
267	ST_8	GAACCTTTCCCG	GGACTACCAGGGTATCTAGT	CCTGATGGTCCCATAGATCA	806F_v2	GGACTACCAGGGCATCTACT	2		A/C	C/C	62.3		806Syn_2_ST_5	0	0	0	0	0	0	0	0	0	0	0	0	0	0	0	0	0	0	0	0	0	0	0	0	0	0	0	0	0	0	0	0	0	0	0	0
268	ST_8	GAACCTTTCCCG	GGACTACCAGGGTATCTAGT	CCTGATGGTCCCATAGATCA	806F_v3	GGACTACCAGGGCATCTATT	2		A/C	C/T	60.6		806Syn_3_ST_5	0	0	0	0	0	0	0	0	0	0	0	0	0	0	0	0	0	0	0	0	0	0	0	0	0	0	0	0	0	0	0	0	0	0	0	0
269	ST_8	GAACCTTTCCCG	GGACTACCAGGGTATCTAGT	CCTGATGGTCCCATAGATCA	806F_v5	GGACTACCAGGGCATCTAGT	1		A/C		62.3		806Syn_5_ST_5	0	0	0	0	0	0	0	0	0	0	0	0	0	0	0	0	0	0	0	0	0	0	0	0	0	0	0	0	0	1	0	0	0	0	0	0
270	ST_8	GAACCTTTCCCG	GGACTACCAGGGTATCTAGT	CCTGATGGTCCCATAGATCA	806F_v9	GGACTACCAGGGAATCTACT	2		A/A	C/C	59.7		806Syn_9_ST_5	0	0	0	0	0	0	0	0	0	0	0	0	0	0	0	0	0	0	0	0	0	0	0	0	0	0	0	0	0	0	0	0	0	0	0	0
271	ST_8	GAACCTTTCCCG	GGACTACCAGGGTATCTAGT	CCTGATGGTCCCATAGATCA	806F_v10	GGACTACCAGGGAATCTATT	2		A/A	C/T	58		806Syn_10_ST_5	0	0	0	0	0	0	0	0	0	0	0	0	0	0	0	0	0	0	0	0	0	0	0	0	0	0	0	0	0	0	0	0	0	0	0	0
272	ST_8	GAACCTTTCCCG	GGACTACCAGGGTATCTAGT	CCTGATGGTCCCATAGATCA	806F_v12	GGACTACCAGGGAATCTAGT	1		A/A		59.7		806Syn_12_ST_5	0	0	0	0	0	0	0	0	0	0	0	0	0	0	0	0	0	0	0	0	0	0	0	0	0	0	0	0	0	0	0	0	0	0	0	0
273	ST_8	GAACCTTTCCCG	GGACTACCAGGGTATCTAGT	CCTGATGGTCCCATAGATCA	806F_v13	GGACTACCAGGGGATCTACT	2		A/G	C/C	61.5		806Syn_13_ST_5	1	0	0	0	0	0	0	0	0	0	0	0	0	0	0	0	0	0	0	0	0	0	0	0	0	0	0	0	0	0	0	0	0	0	0	0
274	ST_8	GAACCTTTCCCG	GGACTACCAGGGTATCTAGT	CCTGATGGTCCCATAGATCA	806F_v14	GGACTACCAGGGGATCTATT	2		A/G	C/T	59.8		806Syn_14_ST_5	0	0	0	0	0	0	0	0	0	0	0	0	0	0	0	0	0	0	0	0	0	0	0	0	0	0	0	0	0	0	0	0	0	0	0	0
275	ST_8	GAACCTTTCCCG	GGACTACCAGGGTATCTAGT	CCTGATGGTCCCATAGATCA	806F_v16	GGACTACCAGGGGATCTAGT	1		A/G		61.5		806Syn_16_ST_5	0	0	0	0	0	0	0	0	0	0	0	0	0	0	0	0	0	0	0	0	0	0	0	0	0	0	0	0	0	0	0	0	0	0	0	0
276	ST_8	GAACCTTTCCCG	GGACTACCAGGGTATCTAGT	CCTGATGGTCCCATAGATCA	806F_v19	GGACTATCAGGGCATCTAAT	3	G/T	A/C	C/A	58.4		806Syn_19_ST_5	0	0	0	0	0	0	0	0	0	0	0	0	0	0	0	0	0	0	0	0	0	0	0	0	0	0	0	0	0	0	0	0	0	0	0	0
277	ST_8	GAACCTTTCCCG	GGACTACCAGGGTATCTAGT	CCTGATGGTCCCATAGATCA	806F_v21	GGACTATCAGGGTATCTACT	2	G/T		C/C	56.8		806Syn_21_ST_5	0	0	0	0	0	0	0	0	0	0	0	0	0	0	0	0	0	0	0	0	0	0	0	0	0	0	0	0	0	0	0	0	0	0	0	0
278	ST_8	GAACCTTTCCCG	GGACTACCAGGGTATCTAGT	CCTGATGGTCCCATAGATCA	806F_v22	GGACTATCAGGGTATCTATT	2	G/T		C/T	55.2		806Syn_22_ST_5	0	0	0	0	0	0	0	0	0	0	0	0	0	0	0	0	0	0	0	0	0	0	0	0	0	0	0	0	0	0	0	0	0	0	0	0
279	ST_8	GAACCTTTCCCG	GGACTACCAGGGTATCTAGT	CCTGATGGTCCCATAGATCA	806F_v24	GGACTATCAGGGTATCTAGT	1	G/T			56.8		806Syn_24_ST_5	0	0	0	0	0	0	0	0	0	0	0	0	0	0	0	0	0	0	0	0	0	0	0	0	0	0	0	0	0	0	0	0	0	0	0	0
280	ST_8	GAACCTTTCCCG	GGACTACCAGGGTATCTAGT	CCTGATGGTCCCATAGATCA	806F_v27	GGACTATCAGGGAATCTAAT	3	G/T	A/A	C/A	55.8		806Syn_27_ST_5	0	0	0	0	0	0	0	0	0	0	0	0	0	0	0	0	0	0	0	0	0	0	0	0	0	0	0	0	0	0	0	0	0	0	0	0
281	ST_8	GAACCTTTCCCG	GGACTACCAGGGTATCTAGT	CCTGATGGTCCCATAGATCA	806F_v31	GGACTATCAGGGGATCTAAT	3	G/T	A/G	C/A	57.5		806Syn_31_ST_5	0	0	0	0	0	0	0	0	0	0	0	0	0	0	0	0	0	0	0	0	0	0	0	0	0	0	0	0	0	0	0	0	0	0	0	0
282	ST_8	GAACCTTTCCCG	GGACTACCAGGGTATCTAGT	CCTGATGGTCCCATAGATCA	806F_v35	GGACTAACAGGGCATCTAAT	3	G/A	A/C	C/A	58.9		806Syn_35_ST_5	0	0	0	0	0	0	0	0	0	0	0	0	0	0	0	0	0	0	0	0	0	0	0	0	0	0	0	0	0	0	0	0	0	0	0	0
283	ST_8	GAACCTTTCCCG	GGACTACCAGGGTATCTAGT	CCTGATGGTCCCATAGATCA	806F_v37	GGACTAACAGGGTATCTACT	2	G/A		C/C	57.3		806Syn_37_ST_5	0	0	0	0	0	0	0	0	0	0	0	0	0	0	0	0	0	0	0	0	0	0	0	0	0	0	0	0	0	0	0	0	0	0	0	0
284	ST_8	GAACCTTTCCCG	GGACTACCAGGGTATCTAGT	CCTGATGGTCCCATAGATCA	806F_v38	GGACTAACAGGGTATCTATT	2	G/A		C/T	55.7		806Syn_38_ST_5	0	0	0	0	0	0	0	0	0	0	0	0	0	0	0	0	0	0	0	0	0	0	0	0	0	0	0	0	0	0	0	0	0	0	0	0
285	ST_8	GAACCTTTCCCG	GGACTACCAGGGTATCTAGT	CCTGATGGTCCCATAGATCA	806F_v40	GGACTAACAGGGTATCTAGT	1	G/A			57.3		806Syn_40_ST_5	0	0	0	0	0	0	0	0	0	0	0	0	0	1	0	0	0	0	0	0	0	0	0	0	0	0	0	0	0	0	0	0	0	0	0	0
286	ST_8	GAACCTTTCCCG	GGACTACCAGGGTATCTAGT	CCTGATGGTCCCATAGATCA	806F_v43	GGACTAACAGGGAATCTAAT	3	G/A	A/A	C/A	56.2		806Syn_43_ST_5	0	0	0	0	0	0	0	0	0	0	0	0	0	0	0	0	0	0	0	0	0	0	0	0	0	0	0	0	0	0	0	0	0	0	0	0
287	ST_8	GAACCTTTCCCG	GGACTACCAGGGTATCTAGT	CCTGATGGTCCCATAGATCA	806F_v47	GGACTAACAGGGGATCTAAT	3	G/A	A/G	C/A	58		806Syn_47_ST_5	0	0	0	0	0	0	0	0	0	0	0	0	0	0	0	0	0	0	0	0	0	0	0	0	0	0	0	0	0	0	0	0	0	0	0	0
288	ST_8	GAACCTTTCCCG	GGACTACCAGGGTATCTAGT	CCTGATGGTCCCATAGATCA	806F_v51	GGACTAGCAGGGCATCTAAT	3	G/G	A/C	C/A	60.9		806Syn_51_ST_5	0	0	0	0	0	0	0	0	0	0	0	0	0	0	0	0	0	0	0	0	0	0	0	0	0	0	0	0	0	0	0	0	0	0	0	0
289	ST_8	GAACCTTTCCCG	GGACTACCAGGGTATCTAGT	CCTGATGGTCCCATAGATCA	806F_v53	GGACTAGCAGGGTATCTACT	2	G/G		C/C	59.4		806Syn_53_ST_5	0	0	0	0	0	0	0	0	0	0	0	0	0	0	0	0	0	0	0	0	0	0	0	0	0	0	0	0	0	0	0	0	0	0	0	0
290	ST_8	GAACCTTTCCCG	GGACTACCAGGGTATCTAGT	CCTGATGGTCCCATAGATCA	806F_v54	GGACTAGCAGGGTATCTATT	2	G/G		C/T	57.8		806Syn_54_ST_5	0	0	0	0	0	0	0	0	0	0	0	0	0	0	0	0	0	0	0	0	0	0	0	0	0	0	0	0	0	0	0	0	0	0	0	0
291	ST_8	GAACCTTTCCCG	GGACTACCAGGGTATCTAGT	CCTGATGGTCCCATAGATCA	806F_v56	GGACTAGCAGGGTATCTAGT	1	G/G			59.4		806Syn_56_ST_5	0	0	0	0	0	0	0	0	0	0	0	0	0	0	0	0	0	0	0	0	0	0	0	0	0	0	0	0	0	0	0	0	0	0	0	0
292	ST_8	GAACCTTTCCCG	GGACTACCAGGGTATCTAGT	CCTGATGGTCCCATAGATCA	806F_v59	GGACTAGCAGGGAATCTAAT	3	G/G	A/A	C/A	58.3		806Syn_59_ST_5	0	0	0	0	0	0	0	0	0	0	0	0	0	0	0	0	0	0	0	0	0	0	0	0	0	0	0	0	0	0	0	0	0	0	0	0
293	ST_8	GAACCTTTCCCG	GGACTACCAGGGTATCTAGT	CCTGATGGTCCCATAGATCA	806F_v63	GGACTAGCAGGGGATCTAAT	3	G/G	A/G	C/A	60.1		806Syn_63_ST_5	0	0	0	0	0	0	0	0	0	0	0	0	0	0	0	0	0	0	0	0	0	0	0	0	0	0	0	0	0	0	0	0	0	0	0	0
294	ST_8	GAACCTTTCCCG	GGACTACCAGGGTATCTAGT	CCTGATGGTCCCATAGATCA	806F_v17	GGACTATCAGGGCATCTACT	3	G/T	A/C	C/C	60		806Syn_17_ST_5	0	0	0	0	0	0	0	0	0	0	0	0	0	0	0	0	0	0	0	0	0	0	0	0	0	0	0	0	0	0	0	0	0	0	0	0
295	ST_8	GAACCTTTCCCG	GGACTACCAGGGTATCTAGT	CCTGATGGTCCCATAGATCA	806F_v18	GGACTATCAGGGCATCTATT	3	G/T	A/C	C/T	58.4		806Syn_18_ST_5	0	0	0	0	0	0	0	0	0	0	0	0	0	0	0	0	0	0	0	0	0	0	0	0	0	0	0	0	0	0	0	0	0	0	0	0
296	ST_8	GAACCTTTCCCG	GGACTACCAGGGTATCTAGT	CCTGATGGTCCCATAGATCA	806F_v20	GGACTATCAGGGCATCTAGT	2	G/T	A/C		60		806Syn_20_ST_5	0	0	0	0	0	0	0	0	0	0	0	0	0	0	0	0	0	0	0	0	0	0	0	0	0	0	0	0	0	0	0	0	0	0	0	0
297	ST_8	GAACCTTTCCCG	GGACTACCAGGGTATCTAGT	CCTGATGGTCCCATAGATCA	806F_v25	GGACTATCAGGGAATCTACT	3	G/T	A/A	C/C	57.4		806Syn_25_ST_5	0	0	0	0	0	0	0	0	0	0	0	0	0	0	0	0	0	0	0	0	0	0	0	0	0	0	0	0	0	0	0	0	0	0	0	0
298	ST_8	GAACCTTTCCCG	GGACTACCAGGGTATCTAGT	CCTGATGGTCCCATAGATCA	806F_v26	GGACTATCAGGGAATCTATT	3	G/T	A/A	C/T	55.8		806Syn_26_ST_5	0	0	0	0	0	0	0	0	0	0	0	0	0	0	0	0	0	0	0	0	0	0	0	0	0	0	0	0	0	0	0	0	0	0	0	0
299	ST_8	GAACCTTTCCCG	GGACTACCAGGGTATCTAGT	CCTGATGGTCCCATAGATCA	806F_v28	GGACTATCAGGGAATCTAGT	2	G/T	A/A		57.4		806Syn_28_ST_5	0	0	0	0	0	0	0	0	0	0	0	0	0	0	0	0	0	0	0	0	0	0	0	0	0	0	0	0	0	0	0	0	0	0	0	0
300	ST_8	GAACCTTTCCCG	GGACTACCAGGGTATCTAGT	CCTGATGGTCCCATAGATCA	806F_v29	GGACTATCAGGGGATCTACT	3	G/T	A/G	C/C	59.2		806Syn_29_ST_5	0	0	0	0	0	0	0	0	0	0	0	0	0	0	0	0	0	0	0	0	0	0	0	0	0	0	0	0	0	0	0	0	0	0	0	0
301	ST_8	GAACCTTTCCCG	GGACTACCAGGGTATCTAGT	CCTGATGGTCCCATAGATCA	806F_v30	GGACTATCAGGGGATCTATT	3	G/T	A/G	C/T	57.5		806Syn_30_ST_5	0	0	0	0	0	0	0	0	0	0	0	0	0	0	0	0	0	0	0	0	0	0	0	0	0	0	0	0	0	0	0	0	0	0	0	0
302	ST_8	GAACCTTTCCCG	GGACTACCAGGGTATCTAGT	CCTGATGGTCCCATAGATCA	806F_v32	GGACTATCAGGGGATCTAGT	2	G/T	A/G		59.2		806Syn_32_ST_5	0	0	0	0	0	0	0	0	0	0	0	0	0	0	0	0	0	0	0	0	0	0	0	0	0	0	0	0	0	0	0	0	0	0	0	0
303	ST_8	GAACCTTTCCCG	GGACTACCAGGGTATCTAGT	CCTGATGGTCCCATAGATCA	806F_v33	GGACTAACAGGGCATCTACT	3	G/A	A/C	C/C	60.5		806Syn_33_ST_5	0	0	0	0	0	0	0	0	0	0	0	0	0	0	0	0	0	0	0	0	0	0	0	0	0	0	0	0	0	0	0	0	0	0	0	0
304	ST_8	GAACCTTTCCCG	GGACTACCAGGGTATCTAGT	CCTGATGGTCCCATAGATCA	806F_v34	GGACTAACAGGGCATCTATT	3	G/A	A/C	C/T	58.9		806Syn_34_ST_5	0	0	0	0	0	0	0	0	0	0	0	0	0	0	0	0	0	0	0	0	0	0	0	0	0	0	0	0	0	0	0	0	0	0	0	0
305	ST_8	GAACCTTTCCCG	GGACTACCAGGGTATCTAGT	CCTGATGGTCCCATAGATCA	806F_v36	GGACTAACAGGGCATCTAGT	2	G/A	A/C		60.5		806Syn_36_ST_5	0	0	0	0	0	0	0	0	0	0	0	0	0	0	0	0	0	0	0	0	0	0	0	0	0	0	0	0	0	0	0	0	0	0	0	0
306	ST_8	GAACCTTTCCCG	GGACTACCAGGGTATCTAGT	CCTGATGGTCCCATAGATCA	806F_v41	GGACTAACAGGGAATCTACT	3	G/A	A/A	C/C	57.9		806Syn_41_ST_5	0	0	0	0	0	0	0	0	0	0	0	0	0	0	0	0	0	0	0	0	0	0	0	0	0	0	0	0	0	0	0	0	0	0	0	0
307	ST_8	GAACCTTTCCCG	GGACTACCAGGGTATCTAGT	CCTGATGGTCCCATAGATCA	806F_v42	GGACTAACAGGGAATCTATT	3	G/A	A/A	C/T	56.2		806Syn_42_ST_5	0	0	0	0	0	0	0	0	0	0	0	0	0	0	0	0	0	0	0	0	0	0	0	0	0	0	0	0	0	0	0	0	0	0	0	0
308	ST_8	GAACCTTTCCCG	GGACTACCAGGGTATCTAGT	CCTGATGGTCCCATAGATCA	806F_v44	GGACTAACAGGGAATCTAGT	2	G/A	A/A		57.9		806Syn_44_ST_5	0	0	0	0	0	0	0	0	0	0	0	0	0	0	0	0	0	0	0	0	0	0	0	0	0	0	0	0	0	0	0	0	0	0	0	0
309	ST_8	GAACCTTTCCCG	GGACTACCAGGGTATCTAGT	CCTGATGGTCCCATAGATCA	806F_v45	GGACTAACAGGGGATCTACT	3	G/A	A/G	C/C	59.7		806Syn_45_ST_5	0	0	0	0	0	0	0	0	0	0	0	0	0	0	0	0	0	0	0	0	0	0	0	0	0	0	0	0	0	0	0	0	0	0	0	0
310	ST_8	GAACCTTTCCCG	GGACTACCAGGGTATCTAGT	CCTGATGGTCCCATAGATCA	806F_v46	GGACTAACAGGGGATCTATT	3	G/A	A/G	C/T	58		806Syn_46_ST_5	0	0	0	0	0	0	0	0	0	0	0	0	0	0	0	0	0	0	0	0	0	0	0	0	0	0	0	0	0	0	0	0	0	0	0	0
311	ST_8	GAACCTTTCCCG	GGACTACCAGGGTATCTAGT	CCTGATGGTCCCATAGATCA	806F_v48	GGACTAACAGGGGATCTAGT	2	G/A	A/G		59.7		806Syn_48_ST_5	0	0	0	0	0	0	0	0	0	0	0	0	0	0	0	0	0	0	0	0	0	0	0	0	0	0	0	0	0	0	0	0	0	0	0	0
312	ST_8	GAACCTTTCCCG	GGACTACCAGGGTATCTAGT	CCTGATGGTCCCATAGATCA	806F_v49	GGACTAGCAGGGCATCTACT	3	G/G	A/C	C/C	62.6		806Syn_49_ST_5	0	0	0	0	0	0	0	0	0	0	0	0	0	0	0	0	0	0	0	0	0	0	0	0	0	0	0	0	0	0	0	0	0	0	0	0
313	ST_8	GAACCTTTCCCG	GGACTACCAGGGTATCTAGT	CCTGATGGTCCCATAGATCA	806F_v50	GGACTAGCAGGGCATCTATT	3	G/G	A/C	C/T	60.9		806Syn_50_ST_5	0	0	0	0	0	0	0	0	0	0	0	0	0	0	0	0	0	0	0	0	0	0	0	0	0	0	0	0	0	0	0	0	0	0	0	0
314	ST_8	GAACCTTTCCCG	GGACTACCAGGGTATCTAGT	CCTGATGGTCCCATAGATCA	806F_v52	GGACTAGCAGGGCATCTAGT	2	G/G	A/C		62.6		806Syn_52_ST_5	0	0	0	0	0	0	0	0	0	0	0	0	0	0	0	0	0	0	0	0	0	0	0	0	0	0	0	0	0	0	0	0	0	0	0	0
315	ST_8	GAACCTTTCCCG	GGACTACCAGGGTATCTAGT	CCTGATGGTCCCATAGATCA	806F_v57	GGACTAGCAGGGAATCTACT	3	G/G	A/A	C/C	60		806Syn_57_ST_5	0	0	0	0	0	0	0	0	0	0	0	0	0	0	0	0	0	0	0	0	0	0	0	0	0	0	0	0	0	0	0	0	0	0	0	0
316	ST_8	GAACCTTTCCCG	GGACTACCAGGGTATCTAGT	CCTGATGGTCCCATAGATCA	806F_v58	GGACTAGCAGGGAATCTATT	3	G/G	A/A	C/T	58.3		806Syn_58_ST_5	0	0	0	0	0	0	0	0	0	0	0	0	0	0	0	0	0	0	0	0	0	0	0	0	0	0	0	0	0	0	0	0	0	0	0	0
317	ST_8	GAACCTTTCCCG	GGACTACCAGGGTATCTAGT	CCTGATGGTCCCATAGATCA	806F_v60	GGACTAGCAGGGAATCTAGT	2	G/G	A/A		60		806Syn_60_ST_5	0	0	0	0	0	0	0	0	0	0	0	0	0	0	0	0	0	0	0	0	0	0	0	0	0	0	0	0	0	0	0	0	0	0	0	0
318	ST_8	GAACCTTTCCCG	GGACTACCAGGGTATCTAGT	CCTGATGGTCCCATAGATCA	806F_v61	GGACTAGCAGGGGATCTACT	3	G/G	A/G	C/C	61.7		806Syn_61_ST_5	0	0	0	0	0	0	0	0	0	0	0	0	0	0	0	0	0	0	0	0	0	0	0	0	0	0	0	0	0	0	0	0	0	0	0	0
319	ST_8	GAACCTTTCCCG	GGACTACCAGGGTATCTAGT	CCTGATGGTCCCATAGATCA	806F_v62	GGACTAGCAGGGGATCTATT	3	G/G	A/G	C/T	60.1		806Syn_62_ST_5	0	0	0	0	0	0	0	0	0	0	0	0	0	0	0	0	0	0	0	0	0	0	0	0	0	0	0	0	0	0	0	0	0	0	0	0
320	ST_8	GAACCTTTCCCG	GGACTACCAGGGTATCTAGT	CCTGATGGTCCCATAGATCA	806F_v64	GGACTAGCAGGGGATCTAGT	2	G/G	A/G		61.7		806Syn_64_ST_5	0	0	0	0	0	0	0	0	0	0	0	0	0	0	0	0	0	0	0	0	0	0	0	0	0	0	0	0	0	0	0	0	0	0	0	0
321	ST_11	TGCGCTCCAACT	GGACTACCAGGGAATCTAAT	CCTGATGGTCCCTTAGATTA	806F_v1	GGACTACCAGGGTATCTAAT	1		T/T		57.4		806Syn_1_ST_6	0	0	0	1	1	1	0	0	1	0	1	2	1	0	0	0	0	2	0	0	0	1	0	0	3	0	0	0	0	0	0	1	0	1	2	0
322	ST_11	TGCGCTCCAACT	GGACTACCAGGGAATCTAAT	CCTGATGGTCCCTTAGATTA	806F_v4	GGACTACCAGGGCATCTAAT	1		T/C		60.6		806Syn_4_ST_6	0	0	0	0	0	0	0	0	0	0	0	0	0	0	0	0	0	0	0	0	0	0	0	0	0	0	0	0	0	0	0	0	0	0	0	0
323	ST_11	TGCGCTCCAACT	GGACTACCAGGGAATCTAAT	CCTGATGGTCCCTTAGATTA	806F_v6	GGACTACCAGGGTATCTACT	2		T/T	T/C	59.1		806Syn_6_ST_6	0	0	0	0	0	0	0	0	0	0	0	0	0	0	0	0	0	0	0	0	0	0	0	0	0	0	0	0	0	0	0	0	0	0	0	1
324	ST_11	TGCGCTCCAACT	GGACTACCAGGGAATCTAAT	CCTGATGGTCCCTTAGATTA	806F_v7	GGACTACCAGGGTATCTATT	2		T/T	T/T	57.4		806Syn_7_ST_6	0	0	0	0	0	0	0	0	0	0	0	0	0	0	0	0	0	0	0	0	0	0	0	0	0	0	0	0	0	0	0	0	1	0	0	0
325	ST_11	TGCGCTCCAACT	GGACTACCAGGGAATCTAAT	CCTGATGGTCCCTTAGATTA	806F_v8	GGACTACCAGGGTATCTAGT	2		T/T	T/G	59.1		806Syn_8_ST_6	0	0	0	0	0	0	0	0	0	0	0	0	0	0	0	0	0	0	0	0	0	0	0	0	0	0	0	0	0	0	0	0	0	0	0	0
326	ST_11	TGCGCTCCAACT	GGACTACCAGGGAATCTAAT	CCTGATGGTCCCTTAGATTA	806F_v11	GGACTACCAGGGAATCTAAT	0				58		806Syn_11_ST_6	0	0	0	0	0	1	0	0	0	0	0	0	0	0	0	0	0	0	0	0	0	0	0	0	0	0	0	0	0	2	0	0	0	0	0	1
327	ST_11	TGCGCTCCAACT	GGACTACCAGGGAATCTAAT	CCTGATGGTCCCTTAGATTA	806F_v15	GGACTACCAGGGGATCTAAT	1		T/G		59.8		806Syn_15_ST_6	1	0	0	0	0	0	0	0	0	0	0	0	0	0	0	0	2	0	0	0	0	0	0	0	0	0	0	0	0	0	1	0	0	0	2	1
328	ST_11	TGCGCTCCAACT	GGACTACCAGGGAATCTAAT	CCTGATGGTCCCTTAGATTA	806F_v23	GGACTATCAGGGTATCTAAT	2	G/T	T/T		55.2		806Syn_23_ST_6	0	0	0	0	0	0	0	0	0	0	0	0	0	0	0	0	0	0	0	0	0	0	0	0	0	0	0	0	0	0	0	0	0	0	0	0
329	ST_11	TGCGCTCCAACT	GGACTACCAGGGAATCTAAT	CCTGATGGTCCCTTAGATTA	806F_v39	GGACTAACAGGGTATCTAAT	2	G/A	T/T		55.7		806Syn_39_ST_6	0	0	0	0	0	0	0	0	0	0	0	0	0	0	0	0	0	0	0	0	0	0	0	0	0	0	0	0	0	0	0	0	0	0	0	0
330	ST_11	TGCGCTCCAACT	GGACTACCAGGGAATCTAAT	CCTGATGGTCCCTTAGATTA	806F_v55	GGACTAGCAGGGTATCTAAT	2	G/G	T/T		57.8		806Syn_55_ST_6	0	0	0	0	0	0	0	0	0	0	0	0	0	0	0	0	1	0	0	0	0	0	0	0	0	0	0	0	0	0	0	1	0	0	0	0
331	ST_11	TGCGCTCCAACT	GGACTACCAGGGAATCTAAT	CCTGATGGTCCCTTAGATTA	806F_v2	GGACTACCAGGGCATCTACT	2		T/C	T/C	62.3		806Syn_2_ST_6	0	0	0	0	0	0	0	0	0	0	0	0	0	0	0	0	0	0	0	0	0	0	0	0	0	0	0	0	0	0	0	0	0	0	0	0
332	ST_11	TGCGCTCCAACT	GGACTACCAGGGAATCTAAT	CCTGATGGTCCCTTAGATTA	806F_v3	GGACTACCAGGGCATCTATT	2		T/C	T/T	60.6		806Syn_3_ST_6	0	0	0	0	0	0	0	0	0	0	0	0	0	0	0	0	0	0	0	0	0	0	0	0	0	0	0	0	0	0	0	0	0	0	0	0
333	ST_11	TGCGCTCCAACT	GGACTACCAGGGAATCTAAT	CCTGATGGTCCCTTAGATTA	806F_v5	GGACTACCAGGGCATCTAGT	2		T/C	T/G	62.3		806Syn_5_ST_6	0	0	0	0	0	0	0	0	0	0	0	0	0	0	0	0	0	0	0	0	0	0	0	0	0	0	0	0	0	0	0	0	0	0	0	0
334	ST_11	TGCGCTCCAACT	GGACTACCAGGGAATCTAAT	CCTGATGGTCCCTTAGATTA	806F_v9	GGACTACCAGGGAATCTACT	1			T/C	59.7		806Syn_9_ST_6	0	0	0	0	0	0	0	0	0	0	0	0	0	0	0	0	0	0	0	0	0	0	0	0	0	0	0	0	0	0	0	0	0	0	0	0
335	ST_11	TGCGCTCCAACT	GGACTACCAGGGAATCTAAT	CCTGATGGTCCCTTAGATTA	806F_v10	GGACTACCAGGGAATCTATT	1			T/T	58		806Syn_10_ST_6	0	0	0	0	0	0	0	0	0	0	0	0	0	0	0	0	0	0	0	0	0	0	0	0	0	0	0	0	0	0	0	0	0	0	0	0
336	ST_11	TGCGCTCCAACT	GGACTACCAGGGAATCTAAT	CCTGATGGTCCCTTAGATTA	806F_v12	GGACTACCAGGGAATCTAGT	1			T/G	59.7		806Syn_12_ST_6	0	0	0	0	0	0	0	0	0	0	0	0	0	0	0	0	0	0	0	0	0	0	0	0	0	0	0	0	0	0	0	0	0	0	0	0
337	ST_11	TGCGCTCCAACT	GGACTACCAGGGAATCTAAT	CCTGATGGTCCCTTAGATTA	806F_v13	GGACTACCAGGGGATCTACT	2		T/G	T/C	61.5		806Syn_13_ST_6	0	0	0	0	0	0	0	0	0	0	0	0	0	0	0	0	0	0	0	0	0	0	0	1	0	0	0	0	0	0	0	0	0	0	0	0
338	ST_11	TGCGCTCCAACT	GGACTACCAGGGAATCTAAT	CCTGATGGTCCCTTAGATTA	806F_v14	GGACTACCAGGGGATCTATT	2		T/G	T/T	59.8		806Syn_14_ST_6	0	0	0	0	0	0	0	0	0	0	0	0	0	0	0	0	0	0	0	0	0	0	0	0	0	0	0	0	0	0	0	0	0	0	0	0
339	ST_11	TGCGCTCCAACT	GGACTACCAGGGAATCTAAT	CCTGATGGTCCCTTAGATTA	806F_v16	GGACTACCAGGGGATCTAGT	2		T/G	T/G	61.5		806Syn_16_ST_6	0	0	0	0	0	0	0	0	0	0	0	0	0	0	0	0	0	0	0	0	0	0	0	0	0	0	0	0	0	0	0	0	0	0	0	0
340	ST_11	TGCGCTCCAACT	GGACTACCAGGGAATCTAAT	CCTGATGGTCCCTTAGATTA	806F_v19	GGACTATCAGGGCATCTAAT	2	G/T	T/C		58.4		806Syn_19_ST_6	0	0	0	0	0	0	0	0	0	0	0	0	0	0	0	0	0	0	0	0	0	0	0	0	0	0	0	0	0	0	0	0	0	0	0	0
341	ST_11	TGCGCTCCAACT	GGACTACCAGGGAATCTAAT	CCTGATGGTCCCTTAGATTA	806F_v21	GGACTATCAGGGTATCTACT	3	G/T	T/T	T/C	56.8		806Syn_21_ST_6	0	0	0	0	0	0	0	0	0	0	0	0	0	0	0	0	0	0	0	0	0	0	0	0	0	0	0	0	0	0	0	0	0	0	0	0
342	ST_11	TGCGCTCCAACT	GGACTACCAGGGAATCTAAT	CCTGATGGTCCCTTAGATTA	806F_v22	GGACTATCAGGGTATCTATT	3	G/T	T/T	T/T	55.2		806Syn_22_ST_6	0	0	0	0	0	0	0	0	0	0	0	0	0	0	0	0	0	0	0	0	0	0	0	0	0	0	0	0	0	0	0	0	0	0	0	0
343	ST_11	TGCGCTCCAACT	GGACTACCAGGGAATCTAAT	CCTGATGGTCCCTTAGATTA	806F_v24	GGACTATCAGGGTATCTAGT	3	G/T	T/T	T/G	56.8		806Syn_24_ST_6	0	0	0	0	0	0	0	0	0	0	0	0	0	0	0	0	0	0	0	0	0	0	0	0	0	0	0	0	0	0	0	0	0	0	0	0
344	ST_11	TGCGCTCCAACT	GGACTACCAGGGAATCTAAT	CCTGATGGTCCCTTAGATTA	806F_v27	GGACTATCAGGGAATCTAAT	1	G/T			55.8		806Syn_27_ST_6	0	0	0	0	0	0	0	0	0	0	0	0	0	1	0	0	0	0	0	0	0	0	0	0	0	0	0	0	0	0	0	0	0	0	0	0
345	ST_11	TGCGCTCCAACT	GGACTACCAGGGAATCTAAT	CCTGATGGTCCCTTAGATTA	806F_v31	GGACTATCAGGGGATCTAAT	2	G/T	T/G		57.5		806Syn_31_ST_6	0	0	0	0	0	0	0	0	0	0	0	0	0	0	0	0	0	0	0	0	0	0	0	0	0	0	0	0	0	0	0	0	0	0	0	0
346	ST_11	TGCGCTCCAACT	GGACTACCAGGGAATCTAAT	CCTGATGGTCCCTTAGATTA	806F_v35	GGACTAACAGGGCATCTAAT	2	G/A	T/C		58.9		806Syn_35_ST_6	0	0	0	0	0	0	0	0	0	0	0	0	0	0	0	0	0	0	0	0	0	0	0	0	0	0	0	0	0	0	0	0	0	0	0	0
347	ST_11	TGCGCTCCAACT	GGACTACCAGGGAATCTAAT	CCTGATGGTCCCTTAGATTA	806F_v37	GGACTAACAGGGTATCTACT	3	G/A	T/T	T/C	57.3		806Syn_37_ST_6	0	0	0	0	0	0	0	0	0	0	0	0	0	0	0	0	0	0	0	0	0	0	0	0	0	0	0	0	0	0	0	0	0	0	0	0
348	ST_11	TGCGCTCCAACT	GGACTACCAGGGAATCTAAT	CCTGATGGTCCCTTAGATTA	806F_v38	GGACTAACAGGGTATCTATT	3	G/A	T/T	T/T	55.7		806Syn_38_ST_6	0	0	0	0	0	0	0	0	0	0	0	0	0	0	0	0	0	0	0	0	0	0	0	0	0	0	0	0	0	0	0	0	0	0	0	0
349	ST_11	TGCGCTCCAACT	GGACTACCAGGGAATCTAAT	CCTGATGGTCCCTTAGATTA	806F_v40	GGACTAACAGGGTATCTAGT	3	G/A	T/T	T/G	57.3		806Syn_40_ST_6	0	0	0	0	0	0	0	0	0	0	0	0	0	0	0	0	0	0	0	0	0	0	0	0	0	0	0	0	0	0	0	0	0	0	0	0
350	ST_11	TGCGCTCCAACT	GGACTACCAGGGAATCTAAT	CCTGATGGTCCCTTAGATTA	806F_v43	GGACTAACAGGGAATCTAAT	1	G/A			56.2		806Syn_43_ST_6	0	0	0	0	0	0	0	0	0	0	0	0	0	0	0	0	2	0	0	0	0	0	0	0	0	0	0	0	0	2	0	0	0	0	0	0
351	ST_11	TGCGCTCCAACT	GGACTACCAGGGAATCTAAT	CCTGATGGTCCCTTAGATTA	806F_v47	GGACTAACAGGGGATCTAAT	2	G/A	T/G		58		806Syn_47_ST_6	0	0	0	0	0	0	0	0	0	0	0	0	0	0	0	0	0	0	0	0	0	0	0	0	0	0	0	0	0	0	0	0	0	0	0	0
352	ST_11	TGCGCTCCAACT	GGACTACCAGGGAATCTAAT	CCTGATGGTCCCTTAGATTA	806F_v51	GGACTAGCAGGGCATCTAAT	2	G/G	T/C		60.9		806Syn_51_ST_6	0	0	0	0	0	0	0	0	0	0	0	0	0	0	0	0	0	0	0	0	0	0	0	0	0	0	0	0	0	1	0	0	0	0	0	0
353	ST_11	TGCGCTCCAACT	GGACTACCAGGGAATCTAAT	CCTGATGGTCCCTTAGATTA	806F_v53	GGACTAGCAGGGTATCTACT	3	G/G	T/T	T/C	59.4		806Syn_53_ST_6	0	0	0	0	0	0	0	0	0	0	0	0	0	0	0	0	0	0	0	0	0	0	0	0	0	0	0	0	0	0	0	0	0	0	0	0
354	ST_11	TGCGCTCCAACT	GGACTACCAGGGAATCTAAT	CCTGATGGTCCCTTAGATTA	806F_v54	GGACTAGCAGGGTATCTATT	3	G/G	T/T	T/T	57.8		806Syn_54_ST_6	0	0	0	0	0	0	0	0	0	0	0	0	0	0	0	0	0	0	0	0	0	0	0	0	0	0	0	0	0	0	0	0	0	0	0	0
355	ST_11	TGCGCTCCAACT	GGACTACCAGGGAATCTAAT	CCTGATGGTCCCTTAGATTA	806F_v56	GGACTAGCAGGGTATCTAGT	3	G/G	T/T	T/G	59.4		806Syn_56_ST_6	0	0	0	0	0	0	0	0	0	0	0	0	0	0	0	0	0	0	0	0	0	0	0	0	0	0	0	0	0	0	0	0	0	0	0	0
356	ST_11	TGCGCTCCAACT	GGACTACCAGGGAATCTAAT	CCTGATGGTCCCTTAGATTA	806F_v59	GGACTAGCAGGGAATCTAAT	1	G/G			58.3		806Syn_59_ST_6	0	0	0	0	0	0	0	0	0	0	0	0	0	0	0	0	0	0	0	0	0	0	0	0	0	0	0	0	0	0	0	0	0	0	0	0
357	ST_11	TGCGCTCCAACT	GGACTACCAGGGAATCTAAT	CCTGATGGTCCCTTAGATTA	806F_v63	GGACTAGCAGGGGATCTAAT	2	G/G	T/G		60.1		806Syn_63_ST_6	0	0	0	0	0	0	0	0	0	0	0	0	0	0	0	0	0	0	0	0	0	0	0	0	0	0	0	0	0	0	0	0	0	0	0	0
358	ST_11	TGCGCTCCAACT	GGACTACCAGGGAATCTAAT	CCTGATGGTCCCTTAGATTA	806F_v17	GGACTATCAGGGCATCTACT	3	G/T	T/C	T/C	60		806Syn_17_ST_6	0	0	0	0	0	0	0	0	0	0	0	0	0	0	0	0	0	0	0	0	0	0	0	0	0	0	0	0	0	0	0	0	0	0	0	0
359	ST_11	TGCGCTCCAACT	GGACTACCAGGGAATCTAAT	CCTGATGGTCCCTTAGATTA	806F_v18	GGACTATCAGGGCATCTATT	3	G/T	T/C	T/T	58.4		806Syn_18_ST_6	0	0	0	0	0	0	0	0	0	0	0	0	0	0	0	0	0	0	0	0	0	0	0	0	0	0	0	0	0	0	0	0	0	0	0	0
360	ST_11	TGCGCTCCAACT	GGACTACCAGGGAATCTAAT	CCTGATGGTCCCTTAGATTA	806F_v20	GGACTATCAGGGCATCTAGT	3	G/T	T/C	T/G	60		806Syn_20_ST_6	0	0	0	0	0	0	0	0	0	0	0	0	0	0	0	0	0	0	0	0	0	0	0	0	0	0	0	0	0	0	0	0	0	0	0	0
361	ST_11	TGCGCTCCAACT	GGACTACCAGGGAATCTAAT	CCTGATGGTCCCTTAGATTA	806F_v25	GGACTATCAGGGAATCTACT	2	G/T		T/C	57.4		806Syn_25_ST_6	0	0	0	0	0	0	0	0	0	0	0	0	0	0	0	0	0	0	0	0	0	0	0	0	0	0	0	0	0	0	0	0	0	0	0	0
362	ST_11	TGCGCTCCAACT	GGACTACCAGGGAATCTAAT	CCTGATGGTCCCTTAGATTA	806F_v26	GGACTATCAGGGAATCTATT	2	G/T		T/T	55.8		806Syn_26_ST_6	0	0	0	0	0	0	0	0	0	0	0	0	0	0	0	0	0	0	0	0	0	0	0	0	0	0	0	0	0	0	0	0	0	0	0	0
363	ST_11	TGCGCTCCAACT	GGACTACCAGGGAATCTAAT	CCTGATGGTCCCTTAGATTA	806F_v28	GGACTATCAGGGAATCTAGT	2	G/T		T/G	57.4		806Syn_28_ST_6	0	0	0	0	0	0	0	0	0	0	0	0	0	0	0	0	0	0	0	0	0	0	0	0	0	0	0	0	0	0	0	0	0	0	0	0
364	ST_11	TGCGCTCCAACT	GGACTACCAGGGAATCTAAT	CCTGATGGTCCCTTAGATTA	806F_v29	GGACTATCAGGGGATCTACT	3	G/T	T/G	T/C	59.2		806Syn_29_ST_6	0	0	0	0	0	0	0	0	0	0	0	0	0	0	0	0	0	0	0	0	0	0	0	0	0	0	0	0	0	0	0	0	0	0	0	0
365	ST_11	TGCGCTCCAACT	GGACTACCAGGGAATCTAAT	CCTGATGGTCCCTTAGATTA	806F_v30	GGACTATCAGGGGATCTATT	3	G/T	T/G	T/T	57.5		806Syn_30_ST_6	0	0	0	0	0	0	0	0	0	0	0	0	0	0	0	0	0	0	0	0	0	0	0	0	0	0	0	0	0	0	0	0	0	0	0	0
366	ST_11	TGCGCTCCAACT	GGACTACCAGGGAATCTAAT	CCTGATGGTCCCTTAGATTA	806F_v32	GGACTATCAGGGGATCTAGT	3	G/T	T/G	T/G	59.2		806Syn_32_ST_6	0	0	0	0	0	0	0	0	0	0	0	0	0	0	0	0	0	0	0	0	0	0	0	0	0	0	0	0	0	0	0	0	0	0	0	0
367	ST_11	TGCGCTCCAACT	GGACTACCAGGGAATCTAAT	CCTGATGGTCCCTTAGATTA	806F_v33	GGACTAACAGGGCATCTACT	3	G/A	T/C	T/C	60.5		806Syn_33_ST_6	0	0	0	0	0	0	0	0	0	0	0	0	0	0	0	0	0	0	0	0	0	0	0	0	0	0	0	0	0	0	0	0	0	0	0	0
368	ST_11	TGCGCTCCAACT	GGACTACCAGGGAATCTAAT	CCTGATGGTCCCTTAGATTA	806F_v34	GGACTAACAGGGCATCTATT	3	G/A	T/C	T/T	58.9		806Syn_34_ST_6	0	0	0	0	0	0	0	0	0	0	0	0	0	0	0	0	0	0	0	0	0	0	0	0	1	0	0	0	0	0	0	0	0	0	0	0
369	ST_11	TGCGCTCCAACT	GGACTACCAGGGAATCTAAT	CCTGATGGTCCCTTAGATTA	806F_v36	GGACTAACAGGGCATCTAGT	3	G/A	T/C	T/G	60.5		806Syn_36_ST_6	0	0	0	0	0	0	0	0	0	0	0	0	0	0	0	0	0	0	0	0	0	0	0	0	0	0	0	0	0	0	0	0	0	0	0	0
370	ST_11	TGCGCTCCAACT	GGACTACCAGGGAATCTAAT	CCTGATGGTCCCTTAGATTA	806F_v41	GGACTAACAGGGAATCTACT	2	G/A		T/C	57.9		806Syn_41_ST_6	0	0	0	0	0	0	0	0	0	0	0	0	0	0	0	0	0	0	0	0	0	0	0	0	0	0	0	0	0	0	0	0	0	0	0	0
371	ST_11	TGCGCTCCAACT	GGACTACCAGGGAATCTAAT	CCTGATGGTCCCTTAGATTA	806F_v42	GGACTAACAGGGAATCTATT	2	G/A		T/T	56.2		806Syn_42_ST_6	0	0	0	0	0	0	0	0	0	0	0	0	0	0	0	0	0	0	0	0	0	0	0	0	0	0	0	0	0	0	0	0	0	0	0	0
372	ST_11	TGCGCTCCAACT	GGACTACCAGGGAATCTAAT	CCTGATGGTCCCTTAGATTA	806F_v44	GGACTAACAGGGAATCTAGT	2	G/A		T/G	57.9		806Syn_44_ST_6	0	0	0	0	0	0	0	0	0	0	0	0	0	0	0	0	0	0	0	0	0	0	0	0	0	0	0	0	0	0	0	0	0	0	0	0
373	ST_11	TGCGCTCCAACT	GGACTACCAGGGAATCTAAT	CCTGATGGTCCCTTAGATTA	806F_v45	GGACTAACAGGGGATCTACT	3	G/A	T/G	T/C	59.7		806Syn_45_ST_6	0	0	0	0	0	0	0	0	0	0	0	0	0	0	0	0	0	0	0	0	0	0	0	0	0	0	0	0	0	0	0	0	0	0	0	0
374	ST_11	TGCGCTCCAACT	GGACTACCAGGGAATCTAAT	CCTGATGGTCCCTTAGATTA	806F_v46	GGACTAACAGGGGATCTATT	3	G/A	T/G	T/T	58		806Syn_46_ST_6	0	0	0	0	0	0	0	0	0	0	0	0	0	0	0	0	0	0	0	0	0	0	0	0	0	0	0	0	0	0	0	0	0	0	0	0
375	ST_11	TGCGCTCCAACT	GGACTACCAGGGAATCTAAT	CCTGATGGTCCCTTAGATTA	806F_v48	GGACTAACAGGGGATCTAGT	3	G/A	T/G	T/G	59.7		806Syn_48_ST_6	0	0	0	0	0	0	0	0	0	0	0	0	0	0	0	0	0	0	0	0	0	0	0	0	0	0	0	0	0	0	0	0	0	0	0	0
376	ST_11	TGCGCTCCAACT	GGACTACCAGGGAATCTAAT	CCTGATGGTCCCTTAGATTA	806F_v49	GGACTAGCAGGGCATCTACT	3	G/G	T/C	T/C	62.6		806Syn_49_ST_6	0	0	0	0	0	0	0	0	0	0	0	0	0	0	0	0	0	0	0	0	0	0	0	0	0	0	0	0	0	0	0	0	0	0	0	0
377	ST_11	TGCGCTCCAACT	GGACTACCAGGGAATCTAAT	CCTGATGGTCCCTTAGATTA	806F_v50	GGACTAGCAGGGCATCTATT	3	G/G	T/C	T/T	60.9		806Syn_50_ST_6	0	0	0	0	0	0	0	0	0	0	0	0	0	0	0	0	0	0	0	0	0	0	0	0	0	0	0	0	0	0	0	0	0	0	0	0
378	ST_11	TGCGCTCCAACT	GGACTACCAGGGAATCTAAT	CCTGATGGTCCCTTAGATTA	806F_v52	GGACTAGCAGGGCATCTAGT	3	G/G	T/C	T/G	62.6		806Syn_52_ST_6	0	0	0	0	0	0	0	0	0	0	0	0	0	0	0	0	0	0	0	0	0	0	0	0	0	0	0	0	0	0	0	0	0	0	0	0
379	ST_11	TGCGCTCCAACT	GGACTACCAGGGAATCTAAT	CCTGATGGTCCCTTAGATTA	806F_v57	GGACTAGCAGGGAATCTACT	2	G/G		T/C	60		806Syn_57_ST_6	0	0	0	0	0	0	0	0	0	0	0	0	0	0	0	0	0	0	0	0	0	0	0	0	0	0	0	0	0	0	0	0	0	0	0	0
380	ST_11	TGCGCTCCAACT	GGACTACCAGGGAATCTAAT	CCTGATGGTCCCTTAGATTA	806F_v58	GGACTAGCAGGGAATCTATT	2	G/G		T/T	58.3		806Syn_58_ST_6	0	0	0	0	0	0	0	0	0	0	0	0	0	0	0	0	0	0	0	0	0	0	0	0	0	0	0	0	0	0	0	0	0	0	0	0
381	ST_11	TGCGCTCCAACT	GGACTACCAGGGAATCTAAT	CCTGATGGTCCCTTAGATTA	806F_v60	GGACTAGCAGGGAATCTAGT	2	G/G		T/G	60		806Syn_60_ST_6	0	0	0	0	0	0	0	0	0	0	0	0	0	0	0	0	0	0	0	0	0	0	0	0	0	0	0	0	0	0	0	0	0	0	0	0
382	ST_11	TGCGCTCCAACT	GGACTACCAGGGAATCTAAT	CCTGATGGTCCCTTAGATTA	806F_v61	GGACTAGCAGGGGATCTACT	3	G/G	T/G	T/C	61.7		806Syn_61_ST_6	0	0	0	0	0	0	0	0	0	0	0	0	0	0	0	0	0	0	0	0	0	0	0	0	0	0	0	0	0	0	0	0	0	0	0	0
383	ST_11	TGCGCTCCAACT	GGACTACCAGGGAATCTAAT	CCTGATGGTCCCTTAGATTA	806F_v62	GGACTAGCAGGGGATCTATT	3	G/G	T/G	T/T	60.1		806Syn_62_ST_6	0	0	0	0	0	0	0	0	0	0	0	0	0	0	0	0	0	0	0	0	0	0	0	0	0	0	0	0	0	0	0	0	0	0	0	0
384	ST_11	TGCGCTCCAACT	GGACTACCAGGGAATCTAAT	CCTGATGGTCCCTTAGATTA	806F_v64	GGACTAGCAGGGGATCTAGT	3	G/G	T/G	T/G	61.7		806Syn_64_ST_6	0	0	0	0	0	0	0	0	0	0	0	0	0	0	0	0	0	0	0	0	0	0	0	0	0	0	0	0	0	0	0	0	0	0	0	0
385	ST_15	GACCCTAGCTTC	GGACTACCAGGGGATCTAAT	CCTGATGGTCCCCTAGATTA	806F_v1	GGACTACCAGGGTATCTAAT	1		C/T		57.4		806Syn_1_ST_7	0	1	0	0	1	0	0	0	0	1	1	0	0	0	1	1	0	2	2	1	0	3	0	0	2	0	0	0	1	0	0	0	1	0	0	0
386	ST_15	GACCCTAGCTTC	GGACTACCAGGGGATCTAAT	CCTGATGGTCCCCTAGATTA	806F_v4	GGACTACCAGGGCATCTAAT	1		C/C		60.6		806Syn_4_ST_7	0	0	0	0	0	0	0	0	0	0	0	0	0	0	0	0	0	0	0	0	0	0	0	0	0	0	0	0	0	0	0	0	0	0	0	0
387	ST_15	GACCCTAGCTTC	GGACTACCAGGGGATCTAAT	CCTGATGGTCCCCTAGATTA	806F_v6	GGACTACCAGGGTATCTACT	2		C/T	T/C	59.1		806Syn_6_ST_7	0	0	0	0	0	0	0	0	0	0	0	0	0	0	0	0	0	0	0	0	0	0	0	0	0	0	0	0	0	0	0	0	0	0	0	0
388	ST_15	GACCCTAGCTTC	GGACTACCAGGGGATCTAAT	CCTGATGGTCCCCTAGATTA	806F_v7	GGACTACCAGGGTATCTATT	2		C/T	T/T	57.4		806Syn_7_ST_7	0	0	0	0	0	0	0	0	0	0	0	0	0	0	0	0	0	0	0	0	0	0	0	0	0	0	0	0	0	0	1	0	0	0	0	0
389	ST_15	GACCCTAGCTTC	GGACTACCAGGGGATCTAAT	CCTGATGGTCCCCTAGATTA	806F_v8	GGACTACCAGGGTATCTAGT	2		C/T	T/G	59.1		806Syn_8_ST_7	0	0	0	0	0	0	0	0	0	0	0	0	0	0	0	0	0	0	0	0	1	0	0	0	0	0	0	0	0	0	0	0	0	0	0	0
390	ST_15	GACCCTAGCTTC	GGACTACCAGGGGATCTAAT	CCTGATGGTCCCCTAGATTA	806F_v11	GGACTACCAGGGAATCTAAT	1		C/A		58		806Syn_11_ST_7	0	0	0	0	0	0	0	0	0	0	0	0	0	0	0	0	0	0	0	0	0	0	0	0	3	0	0	0	0	0	0	0	0	0	1	0
391	ST_15	GACCCTAGCTTC	GGACTACCAGGGGATCTAAT	CCTGATGGTCCCCTAGATTA	806F_v15	GGACTACCAGGGGATCTAAT	0				59.8		806Syn_15_ST_7	0	0	0	1	0	0	0	0	1	0	0	0	2	0	0	0	2	0	0	1	1	0	0	0	2	0	1	0	0	0	2	0	0	0	1	0
392	ST_15	GACCCTAGCTTC	GGACTACCAGGGGATCTAAT	CCTGATGGTCCCCTAGATTA	806F_v23	GGACTATCAGGGTATCTAAT	2	G/T	C/T		55.2		806Syn_23_ST_7	0	0	0	0	0	0	0	0	0	0	0	0	0	0	0	0	0	0	0	0	0	0	0	0	0	0	0	0	0	0	0	0	0	0	0	0
393	ST_15	GACCCTAGCTTC	GGACTACCAGGGGATCTAAT	CCTGATGGTCCCCTAGATTA	806F_v39	GGACTAACAGGGTATCTAAT	2	G/A	C/T		55.7		806Syn_39_ST_7	0	0	0	0	0	0	0	0	0	0	0	0	0	0	0	0	0	0	0	0	0	0	0	0	0	0	0	0	0	0	0	0	0	0	0	0
394	ST_15	GACCCTAGCTTC	GGACTACCAGGGGATCTAAT	CCTGATGGTCCCCTAGATTA	806F_v55	GGACTAGCAGGGTATCTAAT	2	G/G	C/T		57.8		806Syn_55_ST_7	0	0	0	0	0	1	0	0	0	0	0	0	0	0	0	0	0	0	0	1	0	0	0	0	0	0	0	0	0	0	0	0	0	0	0	0
395	ST_15	GACCCTAGCTTC	GGACTACCAGGGGATCTAAT	CCTGATGGTCCCCTAGATTA	806F_v2	GGACTACCAGGGCATCTACT	2		C/C	T/C	62.3		806Syn_2_ST_7	0	0	0	0	0	0	0	0	0	0	0	0	0	0	0	0	0	0	0	0	0	0	0	0	0	0	0	0	0	0	0	0	0	0	0	0
396	ST_15	GACCCTAGCTTC	GGACTACCAGGGGATCTAAT	CCTGATGGTCCCCTAGATTA	806F_v3	GGACTACCAGGGCATCTATT	2		C/C	T/T	60.6		806Syn_3_ST_7	0	0	0	0	0	0	0	0	0	0	0	0	0	0	0	0	0	0	0	0	0	0	0	0	0	0	0	0	0	0	0	0	0	0	0	0
397	ST_15	GACCCTAGCTTC	GGACTACCAGGGGATCTAAT	CCTGATGGTCCCCTAGATTA	806F_v5	GGACTACCAGGGCATCTAGT	2		C/C	T/G	62.3		806Syn_5_ST_7	0	0	0	0	0	0	0	0	0	0	0	0	0	0	0	0	0	0	0	0	0	0	0	0	0	0	0	0	0	0	0	0	0	0	0	0
398	ST_15	GACCCTAGCTTC	GGACTACCAGGGGATCTAAT	CCTGATGGTCCCCTAGATTA	806F_v9	GGACTACCAGGGAATCTACT	2		C/A	T/C	59.7		806Syn_9_ST_7	0	0	0	0	0	0	0	0	0	0	0	0	0	0	0	0	0	0	0	0	0	0	0	0	0	0	0	0	0	0	0	0	0	0	0	0
399	ST_15	GACCCTAGCTTC	GGACTACCAGGGGATCTAAT	CCTGATGGTCCCCTAGATTA	806F_v10	GGACTACCAGGGAATCTATT	2		C/A	T/T	58		806Syn_10_ST_7	0	0	0	0	0	0	0	0	0	0	0	0	0	0	0	0	0	0	0	0	0	0	0	0	0	0	0	0	0	0	0	0	0	0	0	0
400	ST_15	GACCCTAGCTTC	GGACTACCAGGGGATCTAAT	CCTGATGGTCCCCTAGATTA	806F_v12	GGACTACCAGGGAATCTAGT	2		C/A	T/G	59.7		806Syn_12_ST_7	0	0	0	0	0	0	0	0	0	0	0	0	0	0	0	0	0	0	0	0	0	0	0	0	0	0	0	0	0	0	0	0	0	0	0	0
401	ST_15	GACCCTAGCTTC	GGACTACCAGGGGATCTAAT	CCTGATGGTCCCCTAGATTA	806F_v13	GGACTACCAGGGGATCTACT	1			T/C	61.5		806Syn_13_ST_7	0	0	0	0	0	0	0	0	0	0	0	0	0	0	0	0	0	0	0	0	0	0	0	0	0	0	0	0	0	0	0	0	0	0	0	0
402	ST_15	GACCCTAGCTTC	GGACTACCAGGGGATCTAAT	CCTGATGGTCCCCTAGATTA	806F_v14	GGACTACCAGGGGATCTATT	1			T/T	59.8		806Syn_14_ST_7	0	0	0	0	0	0	0	0	0	0	0	0	0	0	0	0	0	0	0	0	0	0	0	0	0	0	0	0	0	0	0	0	0	0	0	0
403	ST_15	GACCCTAGCTTC	GGACTACCAGGGGATCTAAT	CCTGATGGTCCCCTAGATTA	806F_v16	GGACTACCAGGGGATCTAGT	1			T/G	61.5		806Syn_16_ST_7	0	0	0	0	0	0	0	0	0	0	0	0	0	1	0	0	0	0	0	0	0	0	0	0	0	0	0	0	0	0	0	0	0	0	0	0
404	ST_15	GACCCTAGCTTC	GGACTACCAGGGGATCTAAT	CCTGATGGTCCCCTAGATTA	806F_v19	GGACTATCAGGGCATCTAAT	2	G/T	C/C		58.4		806Syn_19_ST_7	0	0	0	0	0	0	0	0	0	0	0	0	0	0	0	0	0	0	0	0	0	0	0	0	0	0	0	0	0	0	0	0	0	0	0	0
405	ST_15	GACCCTAGCTTC	GGACTACCAGGGGATCTAAT	CCTGATGGTCCCCTAGATTA	806F_v21	GGACTATCAGGGTATCTACT	3	G/T	C/T	T/C	56.8		806Syn_21_ST_7	0	0	0	0	0	0	0	0	0	0	0	0	0	0	0	0	0	0	0	0	0	0	0	0	0	0	0	0	0	0	0	0	0	0	0	0
406	ST_15	GACCCTAGCTTC	GGACTACCAGGGGATCTAAT	CCTGATGGTCCCCTAGATTA	806F_v22	GGACTATCAGGGTATCTATT	3	G/T	C/T	T/T	55.2		806Syn_22_ST_7	0	0	0	0	0	0	0	0	0	0	0	0	0	0	0	0	0	0	0	0	0	0	0	0	0	0	0	0	0	0	0	0	0	0	0	0
407	ST_15	GACCCTAGCTTC	GGACTACCAGGGGATCTAAT	CCTGATGGTCCCCTAGATTA	806F_v24	GGACTATCAGGGTATCTAGT	3	G/T	C/T	T/G	56.8		806Syn_24_ST_7	0	0	0	0	0	0	0	0	0	0	0	0	0	0	0	0	0	0	0	0	0	0	0	0	0	0	0	0	0	0	0	0	0	0	0	0
408	ST_15	GACCCTAGCTTC	GGACTACCAGGGGATCTAAT	CCTGATGGTCCCCTAGATTA	806F_v27	GGACTATCAGGGAATCTAAT	2	G/T	C/A		55.8		806Syn_27_ST_7	0	0	0	0	0	0	0	0	0	0	0	0	0	0	0	0	0	0	0	0	0	0	0	0	0	0	0	0	0	0	0	0	0	0	0	0
409	ST_15	GACCCTAGCTTC	GGACTACCAGGGGATCTAAT	CCTGATGGTCCCCTAGATTA	806F_v31	GGACTATCAGGGGATCTAAT	1	G/T			57.5		806Syn_31_ST_7	0	0	0	0	0	0	0	0	0	0	0	0	0	0	0	0	0	0	0	0	0	0	0	0	0	0	0	0	0	0	0	0	0	0	0	0
410	ST_15	GACCCTAGCTTC	GGACTACCAGGGGATCTAAT	CCTGATGGTCCCCTAGATTA	806F_v35	GGACTAACAGGGCATCTAAT	2	G/A	C/C		58.9		806Syn_35_ST_7	0	0	0	0	0	0	0	0	0	0	0	0	0	0	0	0	0	0	0	0	0	0	0	0	0	0	0	0	0	0	0	0	0	0	0	0
411	ST_15	GACCCTAGCTTC	GGACTACCAGGGGATCTAAT	CCTGATGGTCCCCTAGATTA	806F_v37	GGACTAACAGGGTATCTACT	3	G/A	C/T	T/C	57.3		806Syn_37_ST_7	0	0	0	0	0	0	0	0	0	0	0	0	0	0	0	0	0	0	0	0	0	0	0	0	0	0	0	0	0	0	0	0	0	0	0	0
412	ST_15	GACCCTAGCTTC	GGACTACCAGGGGATCTAAT	CCTGATGGTCCCCTAGATTA	806F_v38	GGACTAACAGGGTATCTATT	3	G/A	C/T	T/T	55.7		806Syn_38_ST_7	0	0	0	0	0	0	0	0	0	0	0	0	0	0	0	0	0	0	0	0	0	0	0	0	0	0	0	0	0	0	0	0	0	0	0	0
413	ST_15	GACCCTAGCTTC	GGACTACCAGGGGATCTAAT	CCTGATGGTCCCCTAGATTA	806F_v40	GGACTAACAGGGTATCTAGT	3	G/A	C/T	T/G	57.3		806Syn_40_ST_7	0	0	0	0	0	0	0	0	0	0	0	0	0	0	0	0	0	0	0	0	0	0	0	0	0	0	0	0	0	0	0	0	0	0	0	0
414	ST_15	GACCCTAGCTTC	GGACTACCAGGGGATCTAAT	CCTGATGGTCCCCTAGATTA	806F_v43	GGACTAACAGGGAATCTAAT	2	G/A	C/A		56.2		806Syn_43_ST_7	0	0	0	0	0	0	0	0	0	0	0	0	0	0	0	0	0	0	0	0	0	0	0	0	0	0	0	0	0	0	0	0	0	0	0	0
415	ST_15	GACCCTAGCTTC	GGACTACCAGGGGATCTAAT	CCTGATGGTCCCCTAGATTA	806F_v47	GGACTAACAGGGGATCTAAT	1	G/A			58		806Syn_47_ST_7	0	0	0	0	0	0	0	0	0	0	0	0	0	0	0	0	0	0	0	0	0	0	0	0	0	0	0	0	0	0	0	0	0	0	0	0
416	ST_15	GACCCTAGCTTC	GGACTACCAGGGGATCTAAT	CCTGATGGTCCCCTAGATTA	806F_v51	GGACTAGCAGGGCATCTAAT	2	G/G	C/C		60.9		806Syn_51_ST_7	0	0	0	0	0	0	0	0	0	0	0	0	0	0	0	0	0	0	0	0	0	0	0	0	0	0	0	0	0	0	0	0	0	0	0	0
417	ST_15	GACCCTAGCTTC	GGACTACCAGGGGATCTAAT	CCTGATGGTCCCCTAGATTA	806F_v53	GGACTAGCAGGGTATCTACT	3	G/G	C/T	T/C	59.4		806Syn_53_ST_7	0	0	0	0	0	0	0	0	0	0	0	0	0	0	0	0	0	0	0	0	0	0	0	0	0	0	0	0	0	0	0	0	0	0	0	0
418	ST_15	GACCCTAGCTTC	GGACTACCAGGGGATCTAAT	CCTGATGGTCCCCTAGATTA	806F_v54	GGACTAGCAGGGTATCTATT	3	G/G	C/T	T/T	57.8		806Syn_54_ST_7	0	0	0	0	0	0	0	0	0	0	0	0	0	0	0	0	0	0	0	0	0	0	0	0	0	0	0	0	0	0	0	0	0	0	0	0
419	ST_15	GACCCTAGCTTC	GGACTACCAGGGGATCTAAT	CCTGATGGTCCCCTAGATTA	806F_v56	GGACTAGCAGGGTATCTAGT	3	G/G	C/T	T/G	59.4		806Syn_56_ST_7	0	0	0	0	0	0	0	0	0	0	0	0	0	0	0	0	0	0	0	0	0	0	0	0	0	0	0	0	0	0	0	0	0	0	0	0
420	ST_15	GACCCTAGCTTC	GGACTACCAGGGGATCTAAT	CCTGATGGTCCCCTAGATTA	806F_v59	GGACTAGCAGGGAATCTAAT	2	G/G	C/A		58.3		806Syn_59_ST_7	0	0	0	0	0	0	0	0	0	0	0	0	0	0	0	0	0	0	0	0	0	0	0	0	0	0	0	0	0	0	0	0	0	0	0	0
421	ST_15	GACCCTAGCTTC	GGACTACCAGGGGATCTAAT	CCTGATGGTCCCCTAGATTA	806F_v63	GGACTAGCAGGGGATCTAAT	1	G/G			60.1		806Syn_63_ST_7	0	0	0	0	0	0	0	0	0	0	0	0	0	0	0	0	0	0	0	0	0	0	0	0	1	0	0	0	0	0	0	0	0	0	0	0
422	ST_15	GACCCTAGCTTC	GGACTACCAGGGGATCTAAT	CCTGATGGTCCCCTAGATTA	806F_v17	GGACTATCAGGGCATCTACT	3	G/T	C/C	T/C	60		806Syn_17_ST_7	0	0	0	0	0	0	0	0	0	0	0	0	0	0	0	0	0	0	0	0	0	0	0	0	0	0	0	0	0	0	0	0	0	0	0	0
423	ST_15	GACCCTAGCTTC	GGACTACCAGGGGATCTAAT	CCTGATGGTCCCCTAGATTA	806F_v18	GGACTATCAGGGCATCTATT	3	G/T	C/C	T/T	58.4		806Syn_18_ST_7	0	0	0	0	0	0	0	0	0	0	0	0	0	0	0	0	0	0	0	0	0	0	0	0	0	0	0	0	0	0	0	0	0	0	0	0
424	ST_15	GACCCTAGCTTC	GGACTACCAGGGGATCTAAT	CCTGATGGTCCCCTAGATTA	806F_v20	GGACTATCAGGGCATCTAGT	3	G/T	C/C	T/G	60		806Syn_20_ST_7	0	0	0	0	0	0	0	0	0	0	0	0	0	0	0	0	0	0	0	0	0	0	0	0	0	0	0	0	0	0	0	0	0	0	0	0
425	ST_15	GACCCTAGCTTC	GGACTACCAGGGGATCTAAT	CCTGATGGTCCCCTAGATTA	806F_v25	GGACTATCAGGGAATCTACT	3	G/T	C/A	T/C	57.4		806Syn_25_ST_7	0	0	0	0	0	0	0	0	0	0	0	0	0	0	0	0	0	0	0	0	0	0	0	0	0	0	0	0	0	0	0	0	0	0	0	0
426	ST_15	GACCCTAGCTTC	GGACTACCAGGGGATCTAAT	CCTGATGGTCCCCTAGATTA	806F_v26	GGACTATCAGGGAATCTATT	3	G/T	C/A	T/T	55.8		806Syn_26_ST_7	0	0	0	0	0	0	0	0	0	0	0	0	0	0	0	0	0	0	0	0	0	0	0	0	0	0	0	0	0	0	0	0	0	0	0	0
427	ST_15	GACCCTAGCTTC	GGACTACCAGGGGATCTAAT	CCTGATGGTCCCCTAGATTA	806F_v28	GGACTATCAGGGAATCTAGT	3	G/T	C/A	T/G	57.4		806Syn_28_ST_7	0	0	0	0	0	0	0	0	0	0	0	0	0	0	0	0	0	0	0	0	0	0	0	0	0	0	0	0	0	0	0	0	0	0	0	0
428	ST_15	GACCCTAGCTTC	GGACTACCAGGGGATCTAAT	CCTGATGGTCCCCTAGATTA	806F_v29	GGACTATCAGGGGATCTACT	2	G/T		T/C	59.2		806Syn_29_ST_7	0	0	0	0	0	0	0	0	0	0	0	0	0	0	0	0	0	0	0	0	0	0	0	0	0	0	0	0	0	0	0	0	0	0	0	0
429	ST_15	GACCCTAGCTTC	GGACTACCAGGGGATCTAAT	CCTGATGGTCCCCTAGATTA	806F_v30	GGACTATCAGGGGATCTATT	2	G/T		T/T	57.5		806Syn_30_ST_7	0	0	0	0	0	0	0	0	0	0	0	0	0	0	0	0	0	0	0	0	0	0	0	0	0	0	0	0	0	0	0	0	0	0	0	0
430	ST_15	GACCCTAGCTTC	GGACTACCAGGGGATCTAAT	CCTGATGGTCCCCTAGATTA	806F_v32	GGACTATCAGGGGATCTAGT	2	G/T		T/G	59.2		806Syn_32_ST_7	0	0	0	0	0	0	0	0	0	0	0	0	0	0	0	0	0	0	0	0	0	0	0	0	0	0	0	0	0	0	0	0	0	0	0	0
431	ST_15	GACCCTAGCTTC	GGACTACCAGGGGATCTAAT	CCTGATGGTCCCCTAGATTA	806F_v33	GGACTAACAGGGCATCTACT	3	G/A	C/C	T/C	60.5		806Syn_33_ST_7	0	0	0	0	0	0	0	0	0	0	0	0	0	0	0	0	0	0	0	0	0	0	0	0	0	0	0	0	0	0	0	0	0	0	0	0
432	ST_15	GACCCTAGCTTC	GGACTACCAGGGGATCTAAT	CCTGATGGTCCCCTAGATTA	806F_v34	GGACTAACAGGGCATCTATT	3	G/A	C/C	T/T	58.9		806Syn_34_ST_7	0	0	0	0	0	0	0	0	0	0	0	0	0	0	0	0	0	0	0	0	0	0	0	0	0	0	0	0	0	0	0	0	0	0	0	0
433	ST_15	GACCCTAGCTTC	GGACTACCAGGGGATCTAAT	CCTGATGGTCCCCTAGATTA	806F_v36	GGACTAACAGGGCATCTAGT	3	G/A	C/C	T/G	60.5		806Syn_36_ST_7	0	0	0	0	0	0	0	0	0	0	0	0	0	0	0	0	0	0	0	0	0	0	0	0	0	0	0	0	0	0	0	0	0	0	0	0
434	ST_15	GACCCTAGCTTC	GGACTACCAGGGGATCTAAT	CCTGATGGTCCCCTAGATTA	806F_v41	GGACTAACAGGGAATCTACT	3	G/A	C/A	T/C	57.9		806Syn_41_ST_7	0	0	0	0	0	0	0	0	0	0	0	0	0	0	0	0	0	0	0	0	0	0	0	0	0	0	0	0	0	0	0	0	0	0	0	0
435	ST_15	GACCCTAGCTTC	GGACTACCAGGGGATCTAAT	CCTGATGGTCCCCTAGATTA	806F_v42	GGACTAACAGGGAATCTATT	3	G/A	C/A	T/T	56.2		806Syn_42_ST_7	0	0	0	0	0	0	0	0	0	0	0	0	0	0	0	0	0	0	0	0	0	0	0	0	0	0	0	0	0	0	0	0	0	0	0	0
436	ST_15	GACCCTAGCTTC	GGACTACCAGGGGATCTAAT	CCTGATGGTCCCCTAGATTA	806F_v44	GGACTAACAGGGAATCTAGT	3	G/A	C/A	T/G	57.9		806Syn_44_ST_7	0	0	0	0	0	0	0	0	0	0	0	0	0	0	0	0	0	0	0	0	0	0	0	0	0	0	0	0	0	0	0	0	0	0	0	0
437	ST_15	GACCCTAGCTTC	GGACTACCAGGGGATCTAAT	CCTGATGGTCCCCTAGATTA	806F_v45	GGACTAACAGGGGATCTACT	2	G/A		T/C	59.7		806Syn_45_ST_7	0	0	0	0	0	0	0	0	0	0	0	0	0	0	0	0	0	0	0	0	0	0	0	0	0	0	0	0	0	0	0	0	0	0	0	0
438	ST_15	GACCCTAGCTTC	GGACTACCAGGGGATCTAAT	CCTGATGGTCCCCTAGATTA	806F_v46	GGACTAACAGGGGATCTATT	2	G/A		T/T	58		806Syn_46_ST_7	0	0	0	0	0	0	0	0	0	0	0	0	0	0	0	0	0	0	0	0	0	0	0	0	0	0	0	0	0	0	0	0	0	0	0	0
439	ST_15	GACCCTAGCTTC	GGACTACCAGGGGATCTAAT	CCTGATGGTCCCCTAGATTA	806F_v48	GGACTAACAGGGGATCTAGT	2	G/A		T/G	59.7		806Syn_48_ST_7	0	0	0	0	0	0	0	0	0	0	0	0	0	0	0	0	0	0	0	0	0	0	0	0	0	0	0	0	0	0	0	0	0	0	0	0
440	ST_15	GACCCTAGCTTC	GGACTACCAGGGGATCTAAT	CCTGATGGTCCCCTAGATTA	806F_v49	GGACTAGCAGGGCATCTACT	3	G/G	C/C	T/C	62.6		806Syn_49_ST_7	0	0	0	0	0	0	0	0	0	0	0	0	0	0	0	0	0	0	0	0	0	0	0	0	0	0	0	0	0	0	0	0	0	0	0	0
441	ST_15	GACCCTAGCTTC	GGACTACCAGGGGATCTAAT	CCTGATGGTCCCCTAGATTA	806F_v50	GGACTAGCAGGGCATCTATT	3	G/G	C/C	T/T	60.9		806Syn_50_ST_7	0	0	0	0	0	0	0	0	0	0	0	0	0	0	0	0	0	0	0	0	0	0	0	0	0	0	0	0	0	0	0	0	0	0	0	0
442	ST_15	GACCCTAGCTTC	GGACTACCAGGGGATCTAAT	CCTGATGGTCCCCTAGATTA	806F_v52	GGACTAGCAGGGCATCTAGT	3	G/G	C/C	T/G	62.6		806Syn_52_ST_7	0	0	0	0	0	0	0	0	0	0	0	0	0	0	0	0	0	0	0	0	0	0	0	0	0	0	0	0	0	0	0	0	0	0	0	0
443	ST_15	GACCCTAGCTTC	GGACTACCAGGGGATCTAAT	CCTGATGGTCCCCTAGATTA	806F_v57	GGACTAGCAGGGAATCTACT	3	G/G	C/A	T/C	60		806Syn_57_ST_7	0	0	0	0	0	0	0	0	0	0	0	0	0	0	0	0	0	0	0	0	0	0	0	0	0	0	0	0	0	0	0	0	0	0	0	0
444	ST_15	GACCCTAGCTTC	GGACTACCAGGGGATCTAAT	CCTGATGGTCCCCTAGATTA	806F_v58	GGACTAGCAGGGAATCTATT	3	G/G	C/A	T/T	58.3		806Syn_58_ST_7	0	0	0	0	0	0	0	0	0	0	0	0	0	0	0	0	0	0	0	0	0	0	0	0	0	0	0	0	0	0	0	0	0	0	0	0
445	ST_15	GACCCTAGCTTC	GGACTACCAGGGGATCTAAT	CCTGATGGTCCCCTAGATTA	806F_v60	GGACTAGCAGGGAATCTAGT	3	G/G	C/A	T/G	60		806Syn_60_ST_7	0	0	0	0	0	0	0	0	0	0	0	0	0	0	0	0	0	0	0	0	0	0	0	0	0	0	0	0	0	0	0	0	0	0	0	0
446	ST_15	GACCCTAGCTTC	GGACTACCAGGGGATCTAAT	CCTGATGGTCCCCTAGATTA	806F_v61	GGACTAGCAGGGGATCTACT	2	G/G		T/C	61.7		806Syn_61_ST_7	0	0	0	0	0	0	0	0	0	0	0	0	0	0	0	0	0	0	0	0	0	0	0	0	0	0	0	0	0	0	0	0	0	0	0	0
447	ST_15	GACCCTAGCTTC	GGACTACCAGGGGATCTAAT	CCTGATGGTCCCCTAGATTA	806F_v62	GGACTAGCAGGGGATCTATT	2	G/G		T/T	60.1		806Syn_62_ST_7	0	0	0	0	0	0	0	0	0	0	0	0	0	0	0	0	0	0	0	0	0	0	0	0	0	0	0	0	0	0	0	0	0	0	0	0
448	ST_15	GACCCTAGCTTC	GGACTACCAGGGGATCTAAT	CCTGATGGTCCCCTAGATTA	806F_v64	GGACTAGCAGGGGATCTAGT	2	G/G		T/G	61.7		806Syn_64_ST_7	0	0	0	0	0	0	0	0	0	0	0	0	0	0	0	0	0	0	0	0	0	0	0	0	0	0	0	0	0	0	0	0	0	0	0	0
449	ST_23	CTTAGCATGCCC	GGACTATCAGGGTATCTAAT	CCTGATAGTCCCATAGATTA	806F_v1	GGACTACCAGGGTATCTAAT	1	A/C			57.4		806Syn_1_ST_8	0	0	0	0	0	0	0	0	1	0	0	0	0	0	0	0	0	0	0	1	1	0	0	0	5	1	0	0	0	0	1	0	0	0	1	0
450	ST_23	CTTAGCATGCCC	GGACTATCAGGGTATCTAAT	CCTGATAGTCCCATAGATTA	806F_v4	GGACTACCAGGGCATCTAAT	2	A/C	A/C		60.6		806Syn_4_ST_8	0	0	0	0	0	0	0	0	0	0	0	0	0	0	0	0	0	0	0	0	0	0	0	0	0	0	0	0	0	0	0	0	0	0	0	0
451	ST_23	CTTAGCATGCCC	GGACTATCAGGGTATCTAAT	CCTGATAGTCCCATAGATTA	806F_v6	GGACTACCAGGGTATCTACT	2	A/C		T/C	59.1		806Syn_6_ST_8	0	0	0	0	0	0	0	0	0	0	0	0	1	0	0	0	0	0	0	0	0	0	0	0	0	0	0	0	0	1	0	0	0	0	0	0
452	ST_23	CTTAGCATGCCC	GGACTATCAGGGTATCTAAT	CCTGATAGTCCCATAGATTA	806F_v7	GGACTACCAGGGTATCTATT	2	A/C		T/T	57.4		806Syn_7_ST_8	0	0	0	0	0	0	0	0	0	0	0	0	0	0	0	0	0	0	0	0	0	0	0	0	0	0	0	0	0	0	0	0	0	0	0	0
453	ST_23	CTTAGCATGCCC	GGACTATCAGGGTATCTAAT	CCTGATAGTCCCATAGATTA	806F_v8	GGACTACCAGGGTATCTAGT	2	A/C		T/G	59.1		806Syn_8_ST_8	0	0	0	0	0	0	0	0	0	0	0	0	0	0	0	0	0	0	0	0	0	0	0	0	0	0	0	0	0	0	0	0	0	0	0	0
454	ST_23	CTTAGCATGCCC	GGACTATCAGGGTATCTAAT	CCTGATAGTCCCATAGATTA	806F_v11	GGACTACCAGGGAATCTAAT	2	A/C	A/A		58		806Syn_11_ST_8	0	0	0	0	0	0	0	0	0	0	0	0	1	0	0	0	0	0	0	0	0	0	0	0	0	0	0	0	0	0	0	0	0	0	0	0
455	ST_23	CTTAGCATGCCC	GGACTATCAGGGTATCTAAT	CCTGATAGTCCCATAGATTA	806F_v15	GGACTACCAGGGGATCTAAT	2	A/C	A/G		59.8		806Syn_15_ST_8	0	0	0	0	0	0	0	0	0	0	0	0	0	0	0	0	0	0	0	0	0	0	0	0	0	0	0	0	0	0	0	0	0	0	0	0
456	ST_23	CTTAGCATGCCC	GGACTATCAGGGTATCTAAT	CCTGATAGTCCCATAGATTA	806F_v23	GGACTATCAGGGTATCTAAT	0				55.2		806Syn_23_ST_8	0	0	0	0	2	0	0	0	0	0	0	0	0	0	0	0	0	0	0	0	1	0	0	1	2	0	0	0	0	1	0	0	0	0	1	0
457	ST_23	CTTAGCATGCCC	GGACTATCAGGGTATCTAAT	CCTGATAGTCCCATAGATTA	806F_v39	GGACTAACAGGGTATCTAAT	1	A/A			55.7		806Syn_39_ST_8	0	0	0	0	0	0	1	0	0	0	0	0	1	0	0	0	0	0	0	0	0	0	0	0	1	0	0	0	0	0	0	0	0	1	0	0
458	ST_23	CTTAGCATGCCC	GGACTATCAGGGTATCTAAT	CCTGATAGTCCCATAGATTA	806F_v55	GGACTAGCAGGGTATCTAAT	1	A/G			57.8		806Syn_55_ST_8	0	0	0	0	0	0	0	0	0	0	0	0	1	0	0	0	0	0	0	0	0	0	0	0	0	0	0	0	0	0	0	0	0	0	0	2
459	ST_23	CTTAGCATGCCC	GGACTATCAGGGTATCTAAT	CCTGATAGTCCCATAGATTA	806F_v2	GGACTACCAGGGCATCTACT	3	A/C	A/C	T/C	62.3		806Syn_2_ST_8	0	0	0	0	0	0	0	0	0	0	0	0	0	0	0	0	0	0	0	0	0	0	0	0	0	0	0	0	0	0	0	0	0	0	0	0
460	ST_23	CTTAGCATGCCC	GGACTATCAGGGTATCTAAT	CCTGATAGTCCCATAGATTA	806F_v3	GGACTACCAGGGCATCTATT	3	A/C	A/C	T/T	60.6		806Syn_3_ST_8	0	0	0	0	0	0	0	0	0	0	0	0	0	0	0	0	0	0	0	0	0	0	0	0	0	0	0	0	0	0	0	0	0	0	0	0
461	ST_23	CTTAGCATGCCC	GGACTATCAGGGTATCTAAT	CCTGATAGTCCCATAGATTA	806F_v5	GGACTACCAGGGCATCTAGT	3	A/C	A/C	T/G	62.3		806Syn_5_ST_8	0	0	0	0	0	0	0	0	0	0	0	0	0	0	0	0	0	0	0	0	0	0	0	0	0	0	0	0	0	0	0	0	0	0	0	0
462	ST_23	CTTAGCATGCCC	GGACTATCAGGGTATCTAAT	CCTGATAGTCCCATAGATTA	806F_v9	GGACTACCAGGGAATCTACT	3	A/C	A/A	T/C	59.7		806Syn_9_ST_8	0	0	0	0	0	0	0	0	0	0	0	0	0	0	0	0	0	0	0	0	0	0	0	0	0	0	0	0	0	0	0	0	0	0	0	0
463	ST_23	CTTAGCATGCCC	GGACTATCAGGGTATCTAAT	CCTGATAGTCCCATAGATTA	806F_v10	GGACTACCAGGGAATCTATT	3	A/C	A/A	T/T	58		806Syn_10_ST_8	0	0	0	0	0	0	0	0	0	0	0	0	0	0	0	0	0	0	0	0	0	0	0	0	0	0	0	0	0	0	0	0	0	0	0	0
464	ST_23	CTTAGCATGCCC	GGACTATCAGGGTATCTAAT	CCTGATAGTCCCATAGATTA	806F_v12	GGACTACCAGGGAATCTAGT	3	A/C	A/A	T/G	59.7		806Syn_12_ST_8	0	0	0	0	0	0	0	0	0	0	0	0	0	0	0	0	0	0	0	0	0	0	0	0	0	0	0	0	0	0	0	0	0	0	0	0
465	ST_23	CTTAGCATGCCC	GGACTATCAGGGTATCTAAT	CCTGATAGTCCCATAGATTA	806F_v13	GGACTACCAGGGGATCTACT	3	A/C	A/G	T/C	61.5		806Syn_13_ST_8	0	0	0	0	0	0	0	0	0	0	0	0	0	0	0	0	0	0	0	0	0	0	0	0	0	0	0	0	0	0	0	0	0	0	0	0
466	ST_23	CTTAGCATGCCC	GGACTATCAGGGTATCTAAT	CCTGATAGTCCCATAGATTA	806F_v14	GGACTACCAGGGGATCTATT	3	A/C	A/G	T/T	59.8		806Syn_14_ST_8	0	0	0	0	0	0	0	0	0	0	0	0	0	0	0	0	0	0	0	0	0	0	0	0	0	0	0	0	0	0	0	0	0	0	0	0
467	ST_23	CTTAGCATGCCC	GGACTATCAGGGTATCTAAT	CCTGATAGTCCCATAGATTA	806F_v16	GGACTACCAGGGGATCTAGT	3	A/C	A/G	T/G	61.5		806Syn_16_ST_8	0	0	0	0	0	0	0	0	0	0	0	0	0	0	0	0	0	0	0	0	0	0	0	0	0	0	0	0	0	0	0	0	0	0	0	0
468	ST_23	CTTAGCATGCCC	GGACTATCAGGGTATCTAAT	CCTGATAGTCCCATAGATTA	806F_v19	GGACTATCAGGGCATCTAAT	1		A/C		58.4		806Syn_19_ST_8	0	0	0	0	0	0	0	0	0	0	0	0	0	0	0	0	0	0	0	0	0	0	0	0	0	0	0	0	0	0	0	0	0	0	0	0
469	ST_23	CTTAGCATGCCC	GGACTATCAGGGTATCTAAT	CCTGATAGTCCCATAGATTA	806F_v21	GGACTATCAGGGTATCTACT	1			T/C	56.8		806Syn_21_ST_8	0	0	0	0	0	0	0	0	0	0	0	0	0	0	0	0	0	0	0	0	0	0	0	0	0	0	0	0	0	0	0	0	0	0	0	0
470	ST_23	CTTAGCATGCCC	GGACTATCAGGGTATCTAAT	CCTGATAGTCCCATAGATTA	806F_v22	GGACTATCAGGGTATCTATT	1			T/T	55.2		806Syn_22_ST_8	0	0	0	0	0	0	0	0	0	0	0	0	0	0	0	0	0	0	0	0	0	0	0	0	0	0	0	0	0	0	0	0	0	0	0	0
471	ST_23	CTTAGCATGCCC	GGACTATCAGGGTATCTAAT	CCTGATAGTCCCATAGATTA	806F_v24	GGACTATCAGGGTATCTAGT	1			T/G	56.8		806Syn_24_ST_8	0	0	0	0	0	0	0	0	0	0	0	0	0	0	0	0	0	0	0	0	0	0	0	0	0	0	0	0	0	0	0	0	0	0	0	0
472	ST_23	CTTAGCATGCCC	GGACTATCAGGGTATCTAAT	CCTGATAGTCCCATAGATTA	806F_v27	GGACTATCAGGGAATCTAAT	1		A/A		55.8		806Syn_27_ST_8	0	0	0	0	0	0	0	0	0	0	0	0	0	1	0	0	0	0	0	0	0	0	0	0	0	0	0	0	0	0	0	0	0	0	0	0
473	ST_23	CTTAGCATGCCC	GGACTATCAGGGTATCTAAT	CCTGATAGTCCCATAGATTA	806F_v31	GGACTATCAGGGGATCTAAT	1		A/G		57.5		806Syn_31_ST_8	0	0	0	0	0	0	0	0	0	0	0	0	0	2	0	0	0	0	0	0	0	0	0	0	0	0	0	0	0	0	0	0	0	0	0	0
474	ST_23	CTTAGCATGCCC	GGACTATCAGGGTATCTAAT	CCTGATAGTCCCATAGATTA	806F_v35	GGACTAACAGGGCATCTAAT	2	A/A	A/C		58.9		806Syn_35_ST_8	0	0	0	0	0	0	0	0	0	0	0	0	0	0	0	0	0	0	0	0	0	0	0	0	0	0	0	0	0	0	0	0	0	0	0	0
475	ST_23	CTTAGCATGCCC	GGACTATCAGGGTATCTAAT	CCTGATAGTCCCATAGATTA	806F_v37	GGACTAACAGGGTATCTACT	2	A/A		T/C	57.3		806Syn_37_ST_8	0	0	0	0	0	0	0	0	0	0	0	0	0	0	0	0	0	0	0	0	0	0	0	0	0	0	0	0	0	0	0	0	0	0	0	0
476	ST_23	CTTAGCATGCCC	GGACTATCAGGGTATCTAAT	CCTGATAGTCCCATAGATTA	806F_v38	GGACTAACAGGGTATCTATT	2	A/A		T/T	55.7		806Syn_38_ST_8	0	0	0	0	0	0	0	0	0	0	0	0	0	0	0	0	0	0	0	0	0	0	0	0	0	0	0	0	0	0	0	0	0	0	0	0
477	ST_23	CTTAGCATGCCC	GGACTATCAGGGTATCTAAT	CCTGATAGTCCCATAGATTA	806F_v40	GGACTAACAGGGTATCTAGT	2	A/A		T/G	57.3		806Syn_40_ST_8	0	0	0	0	0	0	0	0	0	0	0	0	0	0	0	0	0	0	0	0	0	0	0	0	0	0	0	0	0	0	0	0	0	0	0	0
478	ST_23	CTTAGCATGCCC	GGACTATCAGGGTATCTAAT	CCTGATAGTCCCATAGATTA	806F_v43	GGACTAACAGGGAATCTAAT	2	A/A	A/A		56.2		806Syn_43_ST_8	0	0	0	0	0	0	0	0	0	0	0	0	0	0	0	0	0	0	0	0	0	0	0	0	0	0	0	0	0	0	0	0	0	0	0	0
479	ST_23	CTTAGCATGCCC	GGACTATCAGGGTATCTAAT	CCTGATAGTCCCATAGATTA	806F_v47	GGACTAACAGGGGATCTAAT	2	A/A	A/G		58		806Syn_47_ST_8	0	0	0	0	0	0	0	0	0	0	0	0	0	0	0	0	0	0	0	0	0	0	0	0	0	0	0	0	0	0	0	0	0	0	0	0
480	ST_23	CTTAGCATGCCC	GGACTATCAGGGTATCTAAT	CCTGATAGTCCCATAGATTA	806F_v51	GGACTAGCAGGGCATCTAAT	2	A/G	A/C		60.9		806Syn_51_ST_8	0	0	0	0	0	0	0	0	0	0	0	0	0	0	0	0	0	0	0	0	0	0	0	0	0	0	0	0	0	0	0	0	0	0	0	0
481	ST_23	CTTAGCATGCCC	GGACTATCAGGGTATCTAAT	CCTGATAGTCCCATAGATTA	806F_v53	GGACTAGCAGGGTATCTACT	2	A/G		T/C	59.4		806Syn_53_ST_8	0	0	0	0	0	0	0	0	0	0	0	0	0	0	0	0	0	0	0	0	0	0	0	0	0	0	0	0	0	0	0	0	0	0	0	0
482	ST_23	CTTAGCATGCCC	GGACTATCAGGGTATCTAAT	CCTGATAGTCCCATAGATTA	806F_v54	GGACTAGCAGGGTATCTATT	2	A/G		T/T	57.8		806Syn_54_ST_8	0	0	0	0	0	0	0	0	0	0	0	0	0	0	0	0	0	0	0	0	0	0	0	0	0	0	0	0	0	0	0	0	0	0	0	0
483	ST_23	CTTAGCATGCCC	GGACTATCAGGGTATCTAAT	CCTGATAGTCCCATAGATTA	806F_v56	GGACTAGCAGGGTATCTAGT	2	A/G		T/G	59.4		806Syn_56_ST_8	0	0	0	0	0	0	0	0	0	0	0	0	0	0	0	0	0	0	0	0	0	0	0	0	0	0	0	0	0	0	0	0	0	0	0	0
484	ST_23	CTTAGCATGCCC	GGACTATCAGGGTATCTAAT	CCTGATAGTCCCATAGATTA	806F_v59	GGACTAGCAGGGAATCTAAT	2	A/G	A/A		58.3		806Syn_59_ST_8	0	0	0	0	0	0	0	0	0	0	0	0	0	0	0	0	0	0	0	0	0	0	0	0	0	0	0	0	0	0	0	0	0	0	0	0
485	ST_23	CTTAGCATGCCC	GGACTATCAGGGTATCTAAT	CCTGATAGTCCCATAGATTA	806F_v63	GGACTAGCAGGGGATCTAAT	2	A/G	A/G		60.1		806Syn_63_ST_8	0	0	0	0	0	0	0	0	0	0	0	0	0	1	0	0	0	0	0	0	0	0	0	0	0	0	0	0	0	0	0	0	0	0	0	0
486	ST_23	CTTAGCATGCCC	GGACTATCAGGGTATCTAAT	CCTGATAGTCCCATAGATTA	806F_v17	GGACTATCAGGGCATCTACT	2		A/C	T/C	60		806Syn_17_ST_8	0	0	0	0	0	0	0	0	0	0	0	0	0	0	0	0	0	0	0	0	0	0	0	0	0	0	0	0	0	0	0	0	0	0	0	0
487	ST_23	CTTAGCATGCCC	GGACTATCAGGGTATCTAAT	CCTGATAGTCCCATAGATTA	806F_v18	GGACTATCAGGGCATCTATT	2		A/C	T/T	58.4		806Syn_18_ST_8	0	0	0	0	0	0	0	0	0	0	0	0	0	0	0	0	0	0	0	0	0	0	0	0	0	0	0	0	0	0	0	0	0	0	0	0
488	ST_23	CTTAGCATGCCC	GGACTATCAGGGTATCTAAT	CCTGATAGTCCCATAGATTA	806F_v20	GGACTATCAGGGCATCTAGT	2		A/C	T/G	60		806Syn_20_ST_8	0	0	0	0	0	0	0	0	0	0	0	0	0	0	0	0	0	0	0	0	0	0	0	0	0	0	0	0	0	0	0	0	0	0	0	0
489	ST_23	CTTAGCATGCCC	GGACTATCAGGGTATCTAAT	CCTGATAGTCCCATAGATTA	806F_v25	GGACTATCAGGGAATCTACT	2		A/A	T/C	57.4		806Syn_25_ST_8	0	0	0	0	0	0	0	0	0	0	0	0	0	0	0	0	0	0	0	0	0	0	0	0	0	0	0	0	0	0	0	0	0	0	0	0
490	ST_23	CTTAGCATGCCC	GGACTATCAGGGTATCTAAT	CCTGATAGTCCCATAGATTA	806F_v26	GGACTATCAGGGAATCTATT	2		A/A	T/T	55.8		806Syn_26_ST_8	0	0	0	0	0	0	0	0	0	0	0	0	0	0	0	0	0	0	0	0	0	0	0	0	0	0	0	0	0	0	0	0	0	0	0	0
491	ST_23	CTTAGCATGCCC	GGACTATCAGGGTATCTAAT	CCTGATAGTCCCATAGATTA	806F_v28	GGACTATCAGGGAATCTAGT	2		A/A	T/G	57.4		806Syn_28_ST_8	0	0	0	0	0	0	0	0	0	0	0	0	0	0	0	0	0	0	0	0	0	0	0	0	0	0	0	0	0	0	0	0	0	0	0	0
492	ST_23	CTTAGCATGCCC	GGACTATCAGGGTATCTAAT	CCTGATAGTCCCATAGATTA	806F_v29	GGACTATCAGGGGATCTACT	2		A/G	T/C	59.2		806Syn_29_ST_8	0	0	0	0	0	0	0	0	0	0	0	0	0	0	0	0	0	0	0	0	0	0	0	0	0	0	0	0	0	0	0	0	0	0	0	0
493	ST_23	CTTAGCATGCCC	GGACTATCAGGGTATCTAAT	CCTGATAGTCCCATAGATTA	806F_v30	GGACTATCAGGGGATCTATT	2		A/G	T/T	57.5		806Syn_30_ST_8	0	0	0	0	0	0	0	0	0	0	0	0	0	0	0	0	0	0	0	0	0	0	0	0	0	0	0	0	0	0	0	0	0	0	0	0
494	ST_23	CTTAGCATGCCC	GGACTATCAGGGTATCTAAT	CCTGATAGTCCCATAGATTA	806F_v32	GGACTATCAGGGGATCTAGT	2		A/G	T/G	59.2		806Syn_32_ST_8	0	0	0	0	0	0	0	0	0	0	0	0	0	0	0	0	0	0	0	0	0	0	0	0	0	0	0	0	0	0	0	0	0	0	0	0
495	ST_23	CTTAGCATGCCC	GGACTATCAGGGTATCTAAT	CCTGATAGTCCCATAGATTA	806F_v33	GGACTAACAGGGCATCTACT	3	A/A	A/C	T/C	60.5		806Syn_33_ST_8	0	0	0	0	0	0	0	0	0	0	0	0	0	0	0	0	0	0	0	0	0	0	0	0	0	0	0	0	0	0	0	0	0	0	0	0
496	ST_23	CTTAGCATGCCC	GGACTATCAGGGTATCTAAT	CCTGATAGTCCCATAGATTA	806F_v34	GGACTAACAGGGCATCTATT	3	A/A	A/C	T/T	58.9		806Syn_34_ST_8	0	0	0	0	0	0	0	0	0	0	0	0	0	0	0	0	0	0	0	0	0	0	0	0	0	0	0	0	0	0	0	0	0	0	0	0
497	ST_23	CTTAGCATGCCC	GGACTATCAGGGTATCTAAT	CCTGATAGTCCCATAGATTA	806F_v36	GGACTAACAGGGCATCTAGT	3	A/A	A/C	T/G	60.5		806Syn_36_ST_8	0	0	0	0	0	0	0	0	0	0	0	0	0	0	0	0	0	0	0	0	0	0	0	0	0	0	0	0	0	0	0	0	0	0	0	0
498	ST_23	CTTAGCATGCCC	GGACTATCAGGGTATCTAAT	CCTGATAGTCCCATAGATTA	806F_v41	GGACTAACAGGGAATCTACT	3	A/A	A/A	T/C	57.9		806Syn_41_ST_8	0	0	0	0	0	0	0	0	0	0	0	0	0	0	0	0	0	0	0	0	0	0	0	0	0	0	0	0	0	0	0	0	0	0	0	0
499	ST_23	CTTAGCATGCCC	GGACTATCAGGGTATCTAAT	CCTGATAGTCCCATAGATTA	806F_v42	GGACTAACAGGGAATCTATT	3	A/A	A/A	T/T	56.2		806Syn_42_ST_8	0	0	0	0	0	0	0	0	0	0	0	0	0	0	0	0	0	0	0	0	0	0	0	0	0	0	0	0	0	0	0	0	0	0	0	0
500	ST_23	CTTAGCATGCCC	GGACTATCAGGGTATCTAAT	CCTGATAGTCCCATAGATTA	806F_v44	GGACTAACAGGGAATCTAGT	3	A/A	A/A	T/G	57.9		806Syn_44_ST_8	0	0	0	0	0	0	0	0	0	0	0	0	0	0	0	0	0	0	0	0	0	0	0	0	0	0	0	0	0	0	0	0	0	0	0	0
501	ST_23	CTTAGCATGCCC	GGACTATCAGGGTATCTAAT	CCTGATAGTCCCATAGATTA	806F_v45	GGACTAACAGGGGATCTACT	3	A/A	A/G	T/C	59.7		806Syn_45_ST_8	0	0	0	0	0	0	0	0	0	0	0	0	0	0	0	0	0	0	0	0	0	0	0	0	0	0	0	0	0	0	0	0	0	0	0	0
502	ST_23	CTTAGCATGCCC	GGACTATCAGGGTATCTAAT	CCTGATAGTCCCATAGATTA	806F_v46	GGACTAACAGGGGATCTATT	3	A/A	A/G	T/T	58		806Syn_46_ST_8	0	0	0	0	0	0	0	0	0	0	0	0	0	0	0	0	0	0	0	0	0	0	0	0	0	0	0	0	0	0	0	0	0	0	0	0
503	ST_23	CTTAGCATGCCC	GGACTATCAGGGTATCTAAT	CCTGATAGTCCCATAGATTA	806F_v48	GGACTAACAGGGGATCTAGT	3	A/A	A/G	T/G	59.7		806Syn_48_ST_8	0	0	0	0	0	0	0	0	0	0	0	0	0	0	0	0	0	0	0	0	0	0	0	0	0	0	0	0	0	0	0	0	0	0	0	0
504	ST_23	CTTAGCATGCCC	GGACTATCAGGGTATCTAAT	CCTGATAGTCCCATAGATTA	806F_v49	GGACTAGCAGGGCATCTACT	3	A/G	A/C	T/C	62.6		806Syn_49_ST_8	0	0	0	0	0	0	0	0	0	0	0	0	0	0	0	0	0	0	0	0	0	0	0	0	0	0	0	0	0	0	0	0	0	0	0	0
505	ST_23	CTTAGCATGCCC	GGACTATCAGGGTATCTAAT	CCTGATAGTCCCATAGATTA	806F_v50	GGACTAGCAGGGCATCTATT	3	A/G	A/C	T/T	60.9		806Syn_50_ST_8	0	0	0	0	0	0	0	0	0	0	0	0	0	0	0	0	0	0	0	0	0	0	0	0	0	0	0	0	0	0	0	0	0	0	0	0
506	ST_23	CTTAGCATGCCC	GGACTATCAGGGTATCTAAT	CCTGATAGTCCCATAGATTA	806F_v52	GGACTAGCAGGGCATCTAGT	3	A/G	A/C	T/G	62.6		806Syn_52_ST_8	0	0	0	0	0	0	0	0	0	0	0	0	0	0	0	0	0	0	0	0	0	0	0	0	0	0	0	0	0	0	0	0	0	0	0	0
507	ST_23	CTTAGCATGCCC	GGACTATCAGGGTATCTAAT	CCTGATAGTCCCATAGATTA	806F_v57	GGACTAGCAGGGAATCTACT	3	A/G	A/A	T/C	60		806Syn_57_ST_8	0	0	0	0	0	0	0	0	0	0	0	0	0	0	0	0	0	0	0	0	0	0	0	0	0	0	0	0	0	0	0	0	0	0	0	0
508	ST_23	CTTAGCATGCCC	GGACTATCAGGGTATCTAAT	CCTGATAGTCCCATAGATTA	806F_v58	GGACTAGCAGGGAATCTATT	3	A/G	A/A	T/T	58.3		806Syn_58_ST_8	0	0	0	0	0	0	0	0	0	0	0	0	0	0	0	0	0	0	0	0	0	0	0	0	0	0	0	0	0	0	0	0	0	0	0	0
509	ST_23	CTTAGCATGCCC	GGACTATCAGGGTATCTAAT	CCTGATAGTCCCATAGATTA	806F_v60	GGACTAGCAGGGAATCTAGT	3	A/G	A/A	T/G	60		806Syn_60_ST_8	0	0	0	0	0	0	0	0	0	0	0	0	0	0	0	0	0	0	0	0	0	0	0	0	0	0	0	0	0	0	0	0	0	0	0	0
510	ST_23	CTTAGCATGCCC	GGACTATCAGGGTATCTAAT	CCTGATAGTCCCATAGATTA	806F_v61	GGACTAGCAGGGGATCTACT	3	A/G	A/G	T/C	61.7		806Syn_61_ST_8	0	0	0	0	0	0	0	0	0	0	0	0	0	0	0	0	0	0	0	0	0	0	0	0	0	0	0	0	0	0	0	0	0	0	0	0
511	ST_23	CTTAGCATGCCC	GGACTATCAGGGTATCTAAT	CCTGATAGTCCCATAGATTA	806F_v62	GGACTAGCAGGGGATCTATT	3	A/G	A/G	T/T	60.1		806Syn_62_ST_8	0	0	0	0	0	0	0	0	0	0	0	0	0	0	0	0	0	0	0	0	0	0	0	0	0	0	0	0	0	0	0	0	0	0	0	0
512	ST_23	CTTAGCATGCCC	GGACTATCAGGGTATCTAAT	CCTGATAGTCCCATAGATTA	806F_v64	GGACTAGCAGGGGATCTAGT	3	A/G	A/G	T/G	61.7		806Syn_64_ST_8	0	0	0	0	0	0	0	0	0	0	0	0	0	0	0	0	0	0	0	0	0	0	0	0	0	0	0	0	0	0	0	0	0	0	0	0
513	ST_39	TCTACCGATGCC	GGACTAACAGGGTATCTAAT	CCTGATTGTCCCATAGATTA	806F_v1	GGACTACCAGGGTATCTAAT	1	T/C			57.4		806Syn_1_ST_9	0	0	0	0	0	0	0	0	0	0	0	0	1	0	0	0	0	0	0	0	1	0	0	0	4	1	0	0	0	1	0	0	1	0	0	0
514	ST_39	TCTACCGATGCC	GGACTAACAGGGTATCTAAT	CCTGATTGTCCCATAGATTA	806F_v4	GGACTACCAGGGCATCTAAT	2	T/C	A/C		60.6		806Syn_4_ST_9	0	0	0	0	0	0	0	0	0	0	0	0	0	0	0	0	0	0	0	0	0	0	0	0	0	0	0	0	0	0	0	0	0	0	0	0
515	ST_39	TCTACCGATGCC	GGACTAACAGGGTATCTAAT	CCTGATTGTCCCATAGATTA	806F_v6	GGACTACCAGGGTATCTACT	2	T/C		T/C	59.1		806Syn_6_ST_9	0	0	0	0	0	0	0	0	0	0	0	0	0	0	0	0	0	0	0	0	0	0	0	0	0	0	0	0	0	0	0	0	0	0	0	0
516	ST_39	TCTACCGATGCC	GGACTAACAGGGTATCTAAT	CCTGATTGTCCCATAGATTA	806F_v7	GGACTACCAGGGTATCTATT	2	T/C		T/T	57.4		806Syn_7_ST_9	0	0	0	0	0	0	0	0	0	0	0	0	0	0	0	0	0	0	0	0	0	0	0	0	0	0	0	0	0	0	0	0	0	0	0	0
517	ST_39	TCTACCGATGCC	GGACTAACAGGGTATCTAAT	CCTGATTGTCCCATAGATTA	806F_v8	GGACTACCAGGGTATCTAGT	2	T/C		T/G	59.1		806Syn_8_ST_9	0	0	0	0	0	0	0	0	0	0	0	0	0	0	0	0	0	0	0	0	0	0	0	0	0	0	0	0	0	0	0	0	0	0	0	0
518	ST_39	TCTACCGATGCC	GGACTAACAGGGTATCTAAT	CCTGATTGTCCCATAGATTA	806F_v11	GGACTACCAGGGAATCTAAT	2	T/C	A/A		58		806Syn_11_ST_9	0	0	0	0	0	0	0	1	0	0	0	0	0	0	0	0	0	0	0	0	0	0	0	0	0	0	0	0	0	0	0	0	0	0	0	0
519	ST_39	TCTACCGATGCC	GGACTAACAGGGTATCTAAT	CCTGATTGTCCCATAGATTA	806F_v15	GGACTACCAGGGGATCTAAT	2	T/C	A/G		59.8		806Syn_15_ST_9	0	0	0	0	0	0	0	0	0	0	0	0	0	0	0	0	0	0	0	0	0	0	0	0	1	0	0	0	0	0	0	0	0	0	0	0
520	ST_39	TCTACCGATGCC	GGACTAACAGGGTATCTAAT	CCTGATTGTCCCATAGATTA	806F_v23	GGACTATCAGGGTATCTAAT	1	T/T			55.2		806Syn_23_ST_9	0	0	0	0	2	0	0	0	0	0	0	0	0	0	0	0	0	0	0	0	1	1	0	0	0	0	0	0	0	0	0	0	0	0	0	0
521	ST_39	TCTACCGATGCC	GGACTAACAGGGTATCTAAT	CCTGATTGTCCCATAGATTA	806F_v39	GGACTAACAGGGTATCTAAT	0				55.7		806Syn_39_ST_9	0	0	0	0	1	0	1	0	0	0	0	0	0	0	1	1	0	0	0	0	0	0	1	0	0	0	0	0	0	0	1	0	0	0	0	1
522	ST_39	TCTACCGATGCC	GGACTAACAGGGTATCTAAT	CCTGATTGTCCCATAGATTA	806F_v55	GGACTAGCAGGGTATCTAAT	1	T/G			57.8		806Syn_55_ST_9	0	0	0	1	0	0	0	0	0	0	0	0	0	0	0	1	0	0	0	1	0	0	0	0	0	0	0	0	0	2	0	0	1	1	1	0
523	ST_39	TCTACCGATGCC	GGACTAACAGGGTATCTAAT	CCTGATTGTCCCATAGATTA	806F_v2	GGACTACCAGGGCATCTACT	3	T/C	A/C	T/C	62.3		806Syn_2_ST_9	0	0	0	0	0	0	0	0	0	0	0	0	0	0	0	0	0	0	0	0	0	0	0	0	0	0	0	0	0	0	0	0	0	0	0	0
524	ST_39	TCTACCGATGCC	GGACTAACAGGGTATCTAAT	CCTGATTGTCCCATAGATTA	806F_v3	GGACTACCAGGGCATCTATT	3	T/C	A/C	T/T	60.6		806Syn_3_ST_9	0	0	0	0	0	0	0	0	0	0	0	0	0	0	0	0	0	0	0	0	0	0	0	0	0	0	0	0	0	0	0	0	0	0	0	0
525	ST_39	TCTACCGATGCC	GGACTAACAGGGTATCTAAT	CCTGATTGTCCCATAGATTA	806F_v5	GGACTACCAGGGCATCTAGT	3	T/C	A/C	T/G	62.3		806Syn_5_ST_9	0	0	0	0	0	0	0	0	0	0	0	0	0	0	0	0	0	0	0	0	0	0	0	0	0	0	0	0	0	0	0	0	0	0	0	0
526	ST_39	TCTACCGATGCC	GGACTAACAGGGTATCTAAT	CCTGATTGTCCCATAGATTA	806F_v9	GGACTACCAGGGAATCTACT	3	T/C	A/A	T/C	59.7		806Syn_9_ST_9	0	0	0	0	0	0	0	0	0	0	0	0	0	0	0	0	0	0	0	0	0	0	0	0	0	0	0	0	0	0	0	0	0	0	0	0
527	ST_39	TCTACCGATGCC	GGACTAACAGGGTATCTAAT	CCTGATTGTCCCATAGATTA	806F_v10	GGACTACCAGGGAATCTATT	3	T/C	A/A	T/T	58		806Syn_10_ST_9	0	0	0	0	0	0	0	0	0	0	0	0	0	0	0	0	0	0	0	0	0	0	0	0	0	0	0	0	0	0	0	0	0	0	0	0
528	ST_39	TCTACCGATGCC	GGACTAACAGGGTATCTAAT	CCTGATTGTCCCATAGATTA	806F_v12	GGACTACCAGGGAATCTAGT	3	T/C	A/A	T/G	59.7		806Syn_12_ST_9	0	0	0	0	0	0	0	0	0	0	0	0	0	0	0	0	0	0	0	0	0	0	0	0	0	0	0	0	0	0	0	0	0	0	0	0
529	ST_39	TCTACCGATGCC	GGACTAACAGGGTATCTAAT	CCTGATTGTCCCATAGATTA	806F_v13	GGACTACCAGGGGATCTACT	3	T/C	A/G	T/C	61.5		806Syn_13_ST_9	0	0	0	0	0	0	0	0	0	0	0	0	0	0	0	0	0	0	0	0	0	0	0	0	0	0	0	0	0	0	0	0	0	0	0	0
530	ST_39	TCTACCGATGCC	GGACTAACAGGGTATCTAAT	CCTGATTGTCCCATAGATTA	806F_v14	GGACTACCAGGGGATCTATT	3	T/C	A/G	T/T	59.8		806Syn_14_ST_9	0	0	0	0	0	0	0	0	0	0	0	0	0	0	0	0	0	0	0	0	0	0	0	0	0	0	0	0	0	0	0	0	0	0	0	0
531	ST_39	TCTACCGATGCC	GGACTAACAGGGTATCTAAT	CCTGATTGTCCCATAGATTA	806F_v16	GGACTACCAGGGGATCTAGT	3	T/C	A/G	T/G	61.5		806Syn_16_ST_9	0	0	0	0	0	0	0	0	0	0	0	0	0	0	0	0	0	0	0	0	0	0	0	0	0	0	0	0	0	0	0	0	0	0	0	0
532	ST_39	TCTACCGATGCC	GGACTAACAGGGTATCTAAT	CCTGATTGTCCCATAGATTA	806F_v19	GGACTATCAGGGCATCTAAT	2	T/T	A/C		58.4		806Syn_19_ST_9	0	0	0	0	0	0	0	0	0	0	0	0	0	0	0	0	0	0	0	0	0	0	0	0	0	0	0	0	0	0	0	0	0	0	0	0
533	ST_39	TCTACCGATGCC	GGACTAACAGGGTATCTAAT	CCTGATTGTCCCATAGATTA	806F_v21	GGACTATCAGGGTATCTACT	2	T/T		T/C	56.8		806Syn_21_ST_9	0	0	0	0	0	0	0	0	0	0	0	0	0	0	0	0	0	0	0	0	0	0	0	0	0	0	0	0	0	0	0	0	0	0	0	0
534	ST_39	TCTACCGATGCC	GGACTAACAGGGTATCTAAT	CCTGATTGTCCCATAGATTA	806F_v22	GGACTATCAGGGTATCTATT	2	T/T		T/T	55.2		806Syn_22_ST_9	0	0	0	0	0	0	0	0	0	0	0	0	0	0	0	0	0	0	0	0	0	0	0	0	0	0	0	0	0	0	0	0	0	0	0	0
535	ST_39	TCTACCGATGCC	GGACTAACAGGGTATCTAAT	CCTGATTGTCCCATAGATTA	806F_v24	GGACTATCAGGGTATCTAGT	2	T/T		T/G	56.8		806Syn_24_ST_9	0	0	0	0	0	0	0	0	0	0	0	0	0	0	0	0	0	0	0	0	0	0	0	0	0	0	0	0	0	0	0	0	0	0	0	0
536	ST_39	TCTACCGATGCC	GGACTAACAGGGTATCTAAT	CCTGATTGTCCCATAGATTA	806F_v27	GGACTATCAGGGAATCTAAT	2	T/T	A/A		55.8		806Syn_27_ST_9	0	0	0	0	0	0	0	0	0	0	0	0	0	0	0	0	0	0	0	0	0	0	0	0	0	0	0	0	0	0	0	0	0	0	0	0
537	ST_39	TCTACCGATGCC	GGACTAACAGGGTATCTAAT	CCTGATTGTCCCATAGATTA	806F_v31	GGACTATCAGGGGATCTAAT	2	T/T	A/G		57.5		806Syn_31_ST_9	0	0	0	0	0	0	0	0	0	0	0	0	0	0	0	0	0	0	0	0	0	0	0	0	0	0	0	0	0	0	0	0	0	0	0	0
538	ST_39	TCTACCGATGCC	GGACTAACAGGGTATCTAAT	CCTGATTGTCCCATAGATTA	806F_v35	GGACTAACAGGGCATCTAAT	1		A/C		58.9		806Syn_35_ST_9	0	0	0	0	0	0	0	0	0	0	0	0	0	0	0	0	0	0	0	0	0	0	0	0	0	0	0	0	0	0	0	0	0	0	0	0
539	ST_39	TCTACCGATGCC	GGACTAACAGGGTATCTAAT	CCTGATTGTCCCATAGATTA	806F_v37	GGACTAACAGGGTATCTACT	1			T/C	57.3		806Syn_37_ST_9	0	0	0	0	0	0	0	0	0	0	0	0	0	0	0	0	0	0	0	0	0	0	0	0	0	0	0	0	0	0	0	0	0	0	0	0
540	ST_39	TCTACCGATGCC	GGACTAACAGGGTATCTAAT	CCTGATTGTCCCATAGATTA	806F_v38	GGACTAACAGGGTATCTATT	1			T/T	55.7		806Syn_38_ST_9	0	0	0	0	0	0	0	0	0	0	0	0	0	0	0	0	0	0	0	0	0	0	0	0	0	0	0	0	0	0	0	0	0	0	0	0
541	ST_39	TCTACCGATGCC	GGACTAACAGGGTATCTAAT	CCTGATTGTCCCATAGATTA	806F_v40	GGACTAACAGGGTATCTAGT	1			T/G	57.3		806Syn_40_ST_9	0	0	0	0	0	0	0	0	0	0	0	0	0	0	0	0	0	0	0	0	0	0	0	0	0	0	0	0	0	0	0	0	0	0	0	0
542	ST_39	TCTACCGATGCC	GGACTAACAGGGTATCTAAT	CCTGATTGTCCCATAGATTA	806F_v43	GGACTAACAGGGAATCTAAT	1		A/A		56.2		806Syn_43_ST_9	0	0	0	0	0	0	0	0	0	0	0	0	0	0	0	0	0	0	0	0	0	0	0	0	0	0	0	0	0	0	0	0	0	0	0	0
543	ST_39	TCTACCGATGCC	GGACTAACAGGGTATCTAAT	CCTGATTGTCCCATAGATTA	806F_v47	GGACTAACAGGGGATCTAAT	1		A/G		58		806Syn_47_ST_9	0	0	0	0	0	0	0	0	0	0	0	0	0	3	0	0	0	0	0	0	0	0	0	0	0	0	0	0	0	1	0	0	0	0	0	1
544	ST_39	TCTACCGATGCC	GGACTAACAGGGTATCTAAT	CCTGATTGTCCCATAGATTA	806F_v51	GGACTAGCAGGGCATCTAAT	2	T/G	A/C		60.9		806Syn_51_ST_9	0	0	0	0	0	0	0	0	0	0	0	0	0	0	0	0	0	0	0	0	0	0	0	0	0	0	0	0	0	0	0	0	0	0	0	0
545	ST_39	TCTACCGATGCC	GGACTAACAGGGTATCTAAT	CCTGATTGTCCCATAGATTA	806F_v53	GGACTAGCAGGGTATCTACT	2	T/G		T/C	59.4		806Syn_53_ST_9	0	0	0	0	0	0	0	0	0	0	0	0	0	0	0	0	0	0	0	0	0	0	0	0	0	0	0	0	0	0	0	0	0	0	0	0
546	ST_39	TCTACCGATGCC	GGACTAACAGGGTATCTAAT	CCTGATTGTCCCATAGATTA	806F_v54	GGACTAGCAGGGTATCTATT	2	T/G		T/T	57.8		806Syn_54_ST_9	0	0	0	0	0	0	0	0	0	0	0	0	0	0	0	0	0	0	0	0	0	0	0	0	0	0	0	0	0	0	0	0	0	0	0	0
547	ST_39	TCTACCGATGCC	GGACTAACAGGGTATCTAAT	CCTGATTGTCCCATAGATTA	806F_v56	GGACTAGCAGGGTATCTAGT	2	T/G		T/G	59.4		806Syn_56_ST_9	0	0	0	0	0	0	0	0	0	0	0	0	0	0	0	0	0	0	0	0	0	0	0	0	0	0	0	0	0	0	0	0	0	0	0	0
548	ST_39	TCTACCGATGCC	GGACTAACAGGGTATCTAAT	CCTGATTGTCCCATAGATTA	806F_v59	GGACTAGCAGGGAATCTAAT	2	T/G	A/A		58.3		806Syn_59_ST_9	0	0	0	0	0	0	0	0	0	0	0	0	0	0	0	0	0	0	0	0	0	0	0	0	0	0	0	0	0	0	0	0	0	0	0	0
549	ST_39	TCTACCGATGCC	GGACTAACAGGGTATCTAAT	CCTGATTGTCCCATAGATTA	806F_v63	GGACTAGCAGGGGATCTAAT	2	T/G	A/G		60.1		806Syn_63_ST_9	0	0	0	0	0	0	0	0	0	0	0	0	0	0	0	0	0	0	0	0	0	0	0	0	1	0	0	0	0	0	0	0	0	0	0	0
550	ST_39	TCTACCGATGCC	GGACTAACAGGGTATCTAAT	CCTGATTGTCCCATAGATTA	806F_v17	GGACTATCAGGGCATCTACT	3	T/T	A/C	T/C	60		806Syn_17_ST_9	0	0	0	0	0	0	0	0	0	0	0	0	0	0	0	0	0	0	0	0	0	0	0	0	0	0	0	0	0	0	0	0	0	0	0	0
551	ST_39	TCTACCGATGCC	GGACTAACAGGGTATCTAAT	CCTGATTGTCCCATAGATTA	806F_v18	GGACTATCAGGGCATCTATT	3	T/T	A/C	T/T	58.4		806Syn_18_ST_9	0	0	0	0	0	0	0	0	0	0	0	0	0	0	0	0	0	0	0	0	0	0	0	0	0	0	0	0	0	0	0	0	0	0	0	0
552	ST_39	TCTACCGATGCC	GGACTAACAGGGTATCTAAT	CCTGATTGTCCCATAGATTA	806F_v20	GGACTATCAGGGCATCTAGT	3	T/T	A/C	T/G	60		806Syn_20_ST_9	0	0	0	0	0	0	0	0	0	0	0	0	0	0	0	0	0	0	0	0	0	0	0	0	0	0	0	0	0	0	0	0	0	0	0	0
553	ST_39	TCTACCGATGCC	GGACTAACAGGGTATCTAAT	CCTGATTGTCCCATAGATTA	806F_v25	GGACTATCAGGGAATCTACT	3	T/T	A/A	T/C	57.4		806Syn_25_ST_9	0	0	0	0	0	0	0	0	0	0	0	0	0	0	0	0	0	0	0	0	0	0	0	0	0	0	0	0	0	0	0	0	0	0	0	0
554	ST_39	TCTACCGATGCC	GGACTAACAGGGTATCTAAT	CCTGATTGTCCCATAGATTA	806F_v26	GGACTATCAGGGAATCTATT	3	T/T	A/A	T/T	55.8		806Syn_26_ST_9	0	0	0	0	0	0	0	0	0	0	0	0	0	0	0	0	0	0	0	0	0	0	0	0	0	0	0	0	0	0	0	0	0	0	0	0
555	ST_39	TCTACCGATGCC	GGACTAACAGGGTATCTAAT	CCTGATTGTCCCATAGATTA	806F_v28	GGACTATCAGGGAATCTAGT	3	T/T	A/A	T/G	57.4		806Syn_28_ST_9	0	0	0	0	0	0	0	0	0	0	0	0	0	0	0	0	0	0	0	0	0	0	0	0	0	0	0	0	0	0	0	0	0	0	0	0
556	ST_39	TCTACCGATGCC	GGACTAACAGGGTATCTAAT	CCTGATTGTCCCATAGATTA	806F_v29	GGACTATCAGGGGATCTACT	3	T/T	A/G	T/C	59.2		806Syn_29_ST_9	0	0	0	0	0	0	0	0	0	0	0	0	0	0	0	0	0	0	0	0	0	0	0	0	0	0	0	0	0	0	0	0	0	0	0	0
557	ST_39	TCTACCGATGCC	GGACTAACAGGGTATCTAAT	CCTGATTGTCCCATAGATTA	806F_v30	GGACTATCAGGGGATCTATT	3	T/T	A/G	T/T	57.5		806Syn_30_ST_9	0	0	0	0	0	0	0	0	0	0	0	0	0	0	0	0	0	0	0	0	0	0	0	0	0	0	0	0	0	0	0	0	0	0	0	0
558	ST_39	TCTACCGATGCC	GGACTAACAGGGTATCTAAT	CCTGATTGTCCCATAGATTA	806F_v32	GGACTATCAGGGGATCTAGT	3	T/T	A/G	T/G	59.2		806Syn_32_ST_9	0	0	0	0	0	0	0	0	0	0	0	0	0	0	0	0	0	0	0	0	0	0	0	0	0	0	0	0	0	0	0	0	0	0	0	0
559	ST_39	TCTACCGATGCC	GGACTAACAGGGTATCTAAT	CCTGATTGTCCCATAGATTA	806F_v33	GGACTAACAGGGCATCTACT	2		A/C	T/C	60.5		806Syn_33_ST_9	0	0	0	0	0	0	0	0	0	0	0	0	0	0	0	0	0	0	0	0	0	0	0	0	0	0	0	0	0	0	0	0	0	0	0	0
560	ST_39	TCTACCGATGCC	GGACTAACAGGGTATCTAAT	CCTGATTGTCCCATAGATTA	806F_v34	GGACTAACAGGGCATCTATT	2		A/C	T/T	58.9		806Syn_34_ST_9	0	0	0	0	0	0	0	0	0	0	0	0	0	0	0	0	0	0	0	0	0	0	0	0	0	0	0	0	0	0	0	0	0	0	0	0
561	ST_39	TCTACCGATGCC	GGACTAACAGGGTATCTAAT	CCTGATTGTCCCATAGATTA	806F_v36	GGACTAACAGGGCATCTAGT	2		A/C	T/G	60.5		806Syn_36_ST_9	0	0	0	0	0	0	0	0	0	0	0	0	0	0	0	0	0	0	0	0	0	0	0	0	0	0	0	0	0	0	0	0	0	0	0	0
562	ST_39	TCTACCGATGCC	GGACTAACAGGGTATCTAAT	CCTGATTGTCCCATAGATTA	806F_v41	GGACTAACAGGGAATCTACT	2		A/A	T/C	57.9		806Syn_41_ST_9	0	0	0	0	0	0	0	0	0	0	0	0	0	0	0	0	0	0	0	0	0	0	0	0	0	0	0	0	0	0	0	0	0	0	0	0
563	ST_39	TCTACCGATGCC	GGACTAACAGGGTATCTAAT	CCTGATTGTCCCATAGATTA	806F_v42	GGACTAACAGGGAATCTATT	2		A/A	T/T	56.2		806Syn_42_ST_9	0	0	0	0	0	0	0	0	0	0	0	0	0	0	0	0	0	0	0	0	0	0	0	0	0	0	0	0	0	0	0	0	0	0	0	0
564	ST_39	TCTACCGATGCC	GGACTAACAGGGTATCTAAT	CCTGATTGTCCCATAGATTA	806F_v44	GGACTAACAGGGAATCTAGT	2		A/A	T/G	57.9		806Syn_44_ST_9	0	0	0	0	0	0	0	0	0	0	0	0	0	0	0	0	0	0	0	0	0	0	0	0	0	0	0	0	0	0	0	0	0	0	0	0
565	ST_39	TCTACCGATGCC	GGACTAACAGGGTATCTAAT	CCTGATTGTCCCATAGATTA	806F_v45	GGACTAACAGGGGATCTACT	2		A/G	T/C	59.7		806Syn_45_ST_9	0	0	0	0	0	0	0	0	0	0	0	0	0	0	0	0	0	0	0	0	0	0	0	0	0	0	0	0	0	0	0	0	0	0	0	0
566	ST_39	TCTACCGATGCC	GGACTAACAGGGTATCTAAT	CCTGATTGTCCCATAGATTA	806F_v46	GGACTAACAGGGGATCTATT	2		A/G	T/T	58		806Syn_46_ST_9	0	0	0	0	0	0	0	0	0	0	0	0	0	0	0	0	0	0	0	0	0	0	0	0	0	0	0	0	0	0	0	0	0	0	0	0
567	ST_39	TCTACCGATGCC	GGACTAACAGGGTATCTAAT	CCTGATTGTCCCATAGATTA	806F_v48	GGACTAACAGGGGATCTAGT	2		A/G	T/G	59.7		806Syn_48_ST_9	0	0	0	0	0	0	0	0	0	0	0	0	0	0	0	0	0	0	0	0	0	0	0	0	0	0	0	0	0	0	0	0	0	0	0	0
568	ST_39	TCTACCGATGCC	GGACTAACAGGGTATCTAAT	CCTGATTGTCCCATAGATTA	806F_v49	GGACTAGCAGGGCATCTACT	3	T/G	A/C	T/C	62.6		806Syn_49_ST_9	0	0	0	0	0	0	0	0	0	0	0	0	0	0	0	0	0	0	0	0	0	0	0	0	0	0	0	0	0	0	0	0	0	0	0	0
569	ST_39	TCTACCGATGCC	GGACTAACAGGGTATCTAAT	CCTGATTGTCCCATAGATTA	806F_v50	GGACTAGCAGGGCATCTATT	3	T/G	A/C	T/T	60.9		806Syn_50_ST_9	0	0	0	0	0	0	0	0	0	0	0	0	0	0	0	0	0	0	0	0	0	0	0	0	0	0	0	0	0	0	0	0	0	0	0	0
570	ST_39	TCTACCGATGCC	GGACTAACAGGGTATCTAAT	CCTGATTGTCCCATAGATTA	806F_v52	GGACTAGCAGGGCATCTAGT	3	T/G	A/C	T/G	62.6		806Syn_52_ST_9	0	0	0	0	0	0	0	0	0	0	0	0	0	0	0	0	0	0	0	0	0	0	0	0	0	0	0	0	0	0	0	0	0	0	0	0
571	ST_39	TCTACCGATGCC	GGACTAACAGGGTATCTAAT	CCTGATTGTCCCATAGATTA	806F_v57	GGACTAGCAGGGAATCTACT	3	T/G	A/A	T/C	60		806Syn_57_ST_9	0	0	0	0	0	0	0	0	0	0	0	0	0	0	0	0	0	0	0	0	0	0	0	0	0	0	0	0	0	0	0	0	0	0	0	0
572	ST_39	TCTACCGATGCC	GGACTAACAGGGTATCTAAT	CCTGATTGTCCCATAGATTA	806F_v58	GGACTAGCAGGGAATCTATT	3	T/G	A/A	T/T	58.3		806Syn_58_ST_9	0	0	0	0	0	0	0	0	0	0	0	0	0	0	0	0	0	0	0	0	0	0	0	0	0	0	0	0	0	0	0	0	0	0	0	0
573	ST_39	TCTACCGATGCC	GGACTAACAGGGTATCTAAT	CCTGATTGTCCCATAGATTA	806F_v60	GGACTAGCAGGGAATCTAGT	3	T/G	A/A	T/G	60		806Syn_60_ST_9	0	0	0	0	0	0	0	0	0	0	0	0	0	0	0	0	0	0	0	0	0	0	0	0	0	0	0	0	0	0	0	0	0	0	0	0
574	ST_39	TCTACCGATGCC	GGACTAACAGGGTATCTAAT	CCTGATTGTCCCATAGATTA	806F_v61	GGACTAGCAGGGGATCTACT	3	T/G	A/G	T/C	61.7		806Syn_61_ST_9	0	0	0	0	0	0	0	0	0	0	0	0	0	0	0	0	0	0	0	0	0	0	0	0	0	0	0	0	0	0	0	0	0	0	0	0
575	ST_39	TCTACCGATGCC	GGACTAACAGGGTATCTAAT	CCTGATTGTCCCATAGATTA	806F_v62	GGACTAGCAGGGGATCTATT	3	T/G	A/G	T/T	60.1		806Syn_62_ST_9	0	0	0	0	0	0	0	0	0	0	0	0	0	0	0	0	0	0	0	0	0	0	0	0	0	0	0	0	0	0	0	0	0	0	0	0
576	ST_39	TCTACCGATGCC	GGACTAACAGGGTATCTAAT	CCTGATTGTCCCATAGATTA	806F_v64	GGACTAGCAGGGGATCTAGT	3	T/G	A/G	T/G	61.7		806Syn_64_ST_9	0	0	0	0	0	0	0	0	0	0	0	0	0	0	0	0	0	0	0	0	0	0	0	0	0	0	0	0	0	0	0	0	0	0	0	0
577	ST_55	CGTCCATCTACG	GGACTAGCAGGGTATCTAAT	CCTGATCGTCCCATAGATTA	806F_v1	GGACTACCAGGGTATCTAAT	1	C/C			57.4		806Syn_1_ST_10	0	0	0	2	0	0	0	1	1	1	0	1	0	0	0	0	0	0	0	1	0	0	0	0	3	0	0	0	0	0	0	0	0	0	2	0
578	ST_55	CGTCCATCTACG	GGACTAGCAGGGTATCTAAT	CCTGATCGTCCCATAGATTA	806F_v4	GGACTACCAGGGCATCTAAT	2	C/C	A/C		60.6		806Syn_4_ST_10	0	0	0	0	0	0	0	0	0	0	0	0	0	0	0	0	0	0	0	0	0	0	0	0	0	0	0	0	0	0	0	0	0	0	0	0
579	ST_55	CGTCCATCTACG	GGACTAGCAGGGTATCTAAT	CCTGATCGTCCCATAGATTA	806F_v6	GGACTACCAGGGTATCTACT	2	C/C		T/C	59.1		806Syn_6_ST_10	0	0	0	0	0	0	0	0	0	0	0	0	0	0	0	0	0	0	0	0	0	0	0	0	0	0	0	0	0	0	0	0	0	0	0	0
580	ST_55	CGTCCATCTACG	GGACTAGCAGGGTATCTAAT	CCTGATCGTCCCATAGATTA	806F_v7	GGACTACCAGGGTATCTATT	2	C/C		T/T	57.4		806Syn_7_ST_10	0	0	0	0	0	0	0	0	0	0	0	0	0	0	0	0	0	0	0	0	0	0	0	0	0	0	0	0	0	0	0	0	0	0	0	0
581	ST_55	CGTCCATCTACG	GGACTAGCAGGGTATCTAAT	CCTGATCGTCCCATAGATTA	806F_v8	GGACTACCAGGGTATCTAGT	2	C/C		T/G	59.1		806Syn_8_ST_10	0	0	0	0	0	0	0	0	0	0	0	0	0	0	0	0	0	0	0	0	0	0	0	0	0	0	0	0	0	0	0	0	0	0	0	0
582	ST_55	CGTCCATCTACG	GGACTAGCAGGGTATCTAAT	CCTGATCGTCCCATAGATTA	806F_v11	GGACTACCAGGGAATCTAAT	2	C/C	A/A		58		806Syn_11_ST_10	0	0	0	0	0	0	0	0	0	0	0	0	0	0	0	0	0	0	0	0	0	0	0	0	0	0	0	0	0	0	0	0	0	0	0	0
583	ST_55	CGTCCATCTACG	GGACTAGCAGGGTATCTAAT	CCTGATCGTCCCATAGATTA	806F_v15	GGACTACCAGGGGATCTAAT	2	C/C	A/G		59.8		806Syn_15_ST_10	0	0	0	0	0	0	0	0	0	0	0	0	0	0	0	0	0	0	0	0	0	0	0	0	0	0	0	0	0	0	0	0	0	0	0	0
584	ST_55	CGTCCATCTACG	GGACTAGCAGGGTATCTAAT	CCTGATCGTCCCATAGATTA	806F_v23	GGACTATCAGGGTATCTAAT	1	C/T			55.2		806Syn_23_ST_10	0	0	0	0	1	0	0	0	0	0	0	0	0	0	0	0	0	0	0	0	2	0	1	0	0	0	0	0	0	0	0	0	0	0	0	0
585	ST_55	CGTCCATCTACG	GGACTAGCAGGGTATCTAAT	CCTGATCGTCCCATAGATTA	806F_v39	GGACTAACAGGGTATCTAAT	1	C/A			55.7		806Syn_39_ST_10	0	0	0	0	0	0	0	0	0	0	0	0	0	0	0	0	0	0	0	1	0	1	1	0	0	0	0	0	0	0	0	0	0	0	0	0
586	ST_55	CGTCCATCTACG	GGACTAGCAGGGTATCTAAT	CCTGATCGTCCCATAGATTA	806F_v55	GGACTAGCAGGGTATCTAAT	0				57.8		806Syn_55_ST_10	0	1	0	0	1	0	0	0	0	0	0	0	0	0	0	0	2	0	0	0	0	0	0	1	0	0	0	0	1	2	0	0	0	1	1	3
587	ST_55	CGTCCATCTACG	GGACTAGCAGGGTATCTAAT	CCTGATCGTCCCATAGATTA	806F_v2	GGACTACCAGGGCATCTACT	3	C/C	A/C	T/C	62.3		806Syn_2_ST_10	0	0	0	0	0	0	0	0	0	0	0	0	0	0	0	0	0	0	0	0	0	0	0	0	0	0	0	0	0	0	0	0	0	0	0	0
588	ST_55	CGTCCATCTACG	GGACTAGCAGGGTATCTAAT	CCTGATCGTCCCATAGATTA	806F_v3	GGACTACCAGGGCATCTATT	3	C/C	A/C	T/T	60.6		806Syn_3_ST_10	0	0	0	0	0	0	0	0	0	0	0	0	0	0	0	0	0	0	0	0	0	0	0	0	0	0	0	0	0	0	0	0	0	0	0	0
589	ST_55	CGTCCATCTACG	GGACTAGCAGGGTATCTAAT	CCTGATCGTCCCATAGATTA	806F_v5	GGACTACCAGGGCATCTAGT	3	C/C	A/C	T/G	62.3		806Syn_5_ST_10	0	0	0	0	0	0	0	0	0	0	0	0	0	0	0	0	0	0	0	0	0	0	0	0	0	0	0	0	0	0	0	0	0	0	0	0
590	ST_55	CGTCCATCTACG	GGACTAGCAGGGTATCTAAT	CCTGATCGTCCCATAGATTA	806F_v9	GGACTACCAGGGAATCTACT	3	C/C	A/A	T/C	59.7		806Syn_9_ST_10	0	0	0	0	0	0	0	0	0	0	0	0	0	0	0	0	0	0	0	0	0	0	0	0	0	0	0	0	0	0	0	0	0	0	0	0
591	ST_55	CGTCCATCTACG	GGACTAGCAGGGTATCTAAT	CCTGATCGTCCCATAGATTA	806F_v10	GGACTACCAGGGAATCTATT	3	C/C	A/A	T/T	58		806Syn_10_ST_10	0	0	0	0	0	0	0	0	0	0	0	0	0	0	0	0	0	0	0	0	0	0	0	0	0	0	0	0	0	0	0	0	0	0	0	0
592	ST_55	CGTCCATCTACG	GGACTAGCAGGGTATCTAAT	CCTGATCGTCCCATAGATTA	806F_v12	GGACTACCAGGGAATCTAGT	3	C/C	A/A	T/G	59.7		806Syn_12_ST_10	0	0	0	0	0	0	0	0	0	0	0	0	0	0	0	0	0	0	0	0	0	0	0	0	0	0	0	0	0	0	0	0	0	0	0	0
593	ST_55	CGTCCATCTACG	GGACTAGCAGGGTATCTAAT	CCTGATCGTCCCATAGATTA	806F_v13	GGACTACCAGGGGATCTACT	3	C/C	A/G	T/C	61.5		806Syn_13_ST_10	0	0	0	0	0	0	0	0	0	0	0	0	0	0	0	0	0	0	0	0	0	0	0	0	0	0	0	0	0	0	0	0	0	0	0	0
594	ST_55	CGTCCATCTACG	GGACTAGCAGGGTATCTAAT	CCTGATCGTCCCATAGATTA	806F_v14	GGACTACCAGGGGATCTATT	3	C/C	A/G	T/T	59.8		806Syn_14_ST_10	0	0	0	0	0	0	0	0	0	0	0	0	0	0	0	0	0	0	0	0	0	0	0	0	0	0	0	0	0	0	0	0	0	0	0	0
595	ST_55	CGTCCATCTACG	GGACTAGCAGGGTATCTAAT	CCTGATCGTCCCATAGATTA	806F_v16	GGACTACCAGGGGATCTAGT	3	C/C	A/G	T/G	61.5		806Syn_16_ST_10	0	0	0	0	0	0	0	0	0	0	0	0	0	0	0	0	0	0	0	0	0	0	0	0	0	0	0	0	0	0	0	0	0	0	0	0
596	ST_55	CGTCCATCTACG	GGACTAGCAGGGTATCTAAT	CCTGATCGTCCCATAGATTA	806F_v19	GGACTATCAGGGCATCTAAT	2	C/T	A/C		58.4		806Syn_19_ST_10	0	0	0	0	0	0	0	0	0	0	0	0	0	0	0	0	0	0	0	0	0	0	0	0	0	0	0	0	0	0	0	0	0	0	0	0
597	ST_55	CGTCCATCTACG	GGACTAGCAGGGTATCTAAT	CCTGATCGTCCCATAGATTA	806F_v21	GGACTATCAGGGTATCTACT	2	C/T		T/C	56.8		806Syn_21_ST_10	0	0	0	0	0	0	0	0	0	0	0	0	0	0	0	0	0	0	0	0	0	0	0	0	0	0	0	0	0	0	0	0	0	0	0	0
598	ST_55	CGTCCATCTACG	GGACTAGCAGGGTATCTAAT	CCTGATCGTCCCATAGATTA	806F_v22	GGACTATCAGGGTATCTATT	2	C/T		T/T	55.2		806Syn_22_ST_10	0	0	0	0	0	0	0	0	0	0	0	0	0	0	0	0	0	0	0	0	0	0	0	0	0	0	0	0	0	0	0	0	0	0	0	0
599	ST_55	CGTCCATCTACG	GGACTAGCAGGGTATCTAAT	CCTGATCGTCCCATAGATTA	806F_v24	GGACTATCAGGGTATCTAGT	2	C/T		T/G	56.8		806Syn_24_ST_10	0	0	0	0	0	0	0	0	0	0	0	0	0	0	0	0	0	0	0	0	0	0	0	0	0	0	0	0	0	0	0	0	0	0	0	0
600	ST_55	CGTCCATCTACG	GGACTAGCAGGGTATCTAAT	CCTGATCGTCCCATAGATTA	806F_v27	GGACTATCAGGGAATCTAAT	2	C/T	A/A		55.8		806Syn_27_ST_10	0	0	0	0	0	0	0	0	0	0	0	0	0	0	0	0	0	0	0	0	0	0	0	0	0	0	0	0	0	0	0	0	0	0	0	0
601	ST_55	CGTCCATCTACG	GGACTAGCAGGGTATCTAAT	CCTGATCGTCCCATAGATTA	806F_v31	GGACTATCAGGGGATCTAAT	2	C/T	A/G		57.5		806Syn_31_ST_10	0	0	0	0	0	0	0	0	0	0	0	0	0	0	0	0	0	0	0	0	0	0	0	0	0	0	0	0	0	0	0	0	0	0	0	0
602	ST_55	CGTCCATCTACG	GGACTAGCAGGGTATCTAAT	CCTGATCGTCCCATAGATTA	806F_v35	GGACTAACAGGGCATCTAAT	2	C/A	A/C		58.9		806Syn_35_ST_10	0	0	0	0	0	0	0	0	0	0	0	0	0	0	0	0	0	0	0	0	0	0	0	0	0	0	0	0	0	0	0	0	0	0	0	0
603	ST_55	CGTCCATCTACG	GGACTAGCAGGGTATCTAAT	CCTGATCGTCCCATAGATTA	806F_v37	GGACTAACAGGGTATCTACT	2	C/A		T/C	57.3		806Syn_37_ST_10	0	0	0	0	0	0	0	0	0	0	0	0	0	0	0	0	0	0	0	0	0	0	0	0	0	0	0	0	0	0	0	0	0	0	0	0
604	ST_55	CGTCCATCTACG	GGACTAGCAGGGTATCTAAT	CCTGATCGTCCCATAGATTA	806F_v38	GGACTAACAGGGTATCTATT	2	C/A		T/T	55.7		806Syn_38_ST_10	0	0	0	0	0	0	0	0	0	0	0	0	0	0	0	0	0	0	0	0	0	0	0	0	0	0	0	0	0	0	0	0	0	0	0	0
605	ST_55	CGTCCATCTACG	GGACTAGCAGGGTATCTAAT	CCTGATCGTCCCATAGATTA	806F_v40	GGACTAACAGGGTATCTAGT	2	C/A		T/G	57.3		806Syn_40_ST_10	0	0	0	0	0	0	0	0	0	0	0	0	0	0	0	0	0	0	0	0	0	0	0	0	0	0	0	0	0	0	0	0	0	0	0	0
606	ST_55	CGTCCATCTACG	GGACTAGCAGGGTATCTAAT	CCTGATCGTCCCATAGATTA	806F_v43	GGACTAACAGGGAATCTAAT	2	C/A	A/A		56.2		806Syn_43_ST_10	0	0	0	0	0	0	0	0	0	0	0	0	0	0	0	0	0	0	0	0	0	0	0	0	0	0	0	0	0	0	0	0	0	0	0	0
607	ST_55	CGTCCATCTACG	GGACTAGCAGGGTATCTAAT	CCTGATCGTCCCATAGATTA	806F_v47	GGACTAACAGGGGATCTAAT	2	C/A	A/G		58		806Syn_47_ST_10	0	0	0	0	0	0	0	0	0	0	0	0	0	0	0	0	0	0	0	0	0	0	0	0	0	0	0	0	0	0	0	0	0	0	0	0
608	ST_55	CGTCCATCTACG	GGACTAGCAGGGTATCTAAT	CCTGATCGTCCCATAGATTA	806F_v51	GGACTAGCAGGGCATCTAAT	1		A/C		60.9		806Syn_51_ST_10	0	0	0	0	0	0	0	0	0	0	0	0	0	0	0	0	0	0	0	0	0	0	0	0	0	0	0	0	0	0	0	0	0	0	0	0
609	ST_55	CGTCCATCTACG	GGACTAGCAGGGTATCTAAT	CCTGATCGTCCCATAGATTA	806F_v53	GGACTAGCAGGGTATCTACT	1			T/C	59.4		806Syn_53_ST_10	0	0	0	0	0	0	0	0	0	0	0	0	0	0	0	0	0	0	0	0	0	0	0	0	0	0	0	0	0	0	0	0	0	0	0	0
610	ST_55	CGTCCATCTACG	GGACTAGCAGGGTATCTAAT	CCTGATCGTCCCATAGATTA	806F_v54	GGACTAGCAGGGTATCTATT	1			T/T	57.8		806Syn_54_ST_10	0	0	0	0	0	0	0	0	0	0	0	0	0	0	0	0	0	0	0	0	0	0	0	0	0	0	0	0	0	1	0	0	0	0	0	0
611	ST_55	CGTCCATCTACG	GGACTAGCAGGGTATCTAAT	CCTGATCGTCCCATAGATTA	806F_v56	GGACTAGCAGGGTATCTAGT	1			T/G	59.4		806Syn_56_ST_10	0	0	0	0	0	0	0	0	0	0	0	0	0	0	0	0	0	0	0	0	0	0	0	0	0	0	0	0	0	0	0	0	0	0	0	0
612	ST_55	CGTCCATCTACG	GGACTAGCAGGGTATCTAAT	CCTGATCGTCCCATAGATTA	806F_v59	GGACTAGCAGGGAATCTAAT	1		A/A		58.3		806Syn_59_ST_10	0	0	0	0	0	0	0	0	0	0	0	0	0	1	0	0	0	0	0	0	0	0	0	0	0	0	0	0	0	0	0	0	0	0	0	0
613	ST_55	CGTCCATCTACG	GGACTAGCAGGGTATCTAAT	CCTGATCGTCCCATAGATTA	806F_v63	GGACTAGCAGGGGATCTAAT	1		A/G		60.1		806Syn_63_ST_10	0	0	0	0	0	0	0	0	0	0	0	0	0	0	0	0	0	0	0	0	0	0	0	0	0	0	0	0	0	0	0	0	0	0	0	0
614	ST_55	CGTCCATCTACG	GGACTAGCAGGGTATCTAAT	CCTGATCGTCCCATAGATTA	806F_v17	GGACTATCAGGGCATCTACT	3	C/T	A/C	T/C	60		806Syn_17_ST_10	0	0	0	0	0	0	0	0	0	0	0	0	0	0	0	0	0	0	0	0	0	0	0	0	0	0	0	0	0	0	0	0	0	0	0	0
615	ST_55	CGTCCATCTACG	GGACTAGCAGGGTATCTAAT	CCTGATCGTCCCATAGATTA	806F_v18	GGACTATCAGGGCATCTATT	3	C/T	A/C	T/T	58.4		806Syn_18_ST_10	0	0	0	0	0	0	0	0	0	0	0	0	0	0	0	0	0	0	0	0	0	0	0	0	0	0	0	0	0	0	0	0	0	0	0	0
616	ST_55	CGTCCATCTACG	GGACTAGCAGGGTATCTAAT	CCTGATCGTCCCATAGATTA	806F_v20	GGACTATCAGGGCATCTAGT	3	C/T	A/C	T/G	60		806Syn_20_ST_10	0	0	0	0	0	0	0	0	0	0	0	0	0	0	0	0	0	0	0	0	0	0	0	0	0	0	0	0	0	0	0	0	0	0	0	0
617	ST_55	CGTCCATCTACG	GGACTAGCAGGGTATCTAAT	CCTGATCGTCCCATAGATTA	806F_v25	GGACTATCAGGGAATCTACT	3	C/T	A/A	T/C	57.4		806Syn_25_ST_10	0	0	0	0	0	0	0	0	0	0	0	0	0	0	0	0	0	0	0	0	0	0	0	0	0	0	0	0	0	0	0	0	0	0	0	0
618	ST_55	CGTCCATCTACG	GGACTAGCAGGGTATCTAAT	CCTGATCGTCCCATAGATTA	806F_v26	GGACTATCAGGGAATCTATT	3	C/T	A/A	T/T	55.8		806Syn_26_ST_10	0	0	0	0	0	0	0	0	0	0	0	0	0	0	0	0	0	0	0	0	0	0	0	0	0	0	0	0	0	0	0	0	0	0	0	0
619	ST_55	CGTCCATCTACG	GGACTAGCAGGGTATCTAAT	CCTGATCGTCCCATAGATTA	806F_v28	GGACTATCAGGGAATCTAGT	3	C/T	A/A	T/G	57.4		806Syn_28_ST_10	0	0	0	0	0	0	0	0	0	0	0	0	0	0	0	0	0	0	0	0	0	0	0	0	0	0	0	0	0	0	0	0	0	0	0	0
620	ST_55	CGTCCATCTACG	GGACTAGCAGGGTATCTAAT	CCTGATCGTCCCATAGATTA	806F_v29	GGACTATCAGGGGATCTACT	3	C/T	A/G	T/C	59.2		806Syn_29_ST_10	0	0	0	0	0	0	0	0	0	0	0	0	0	0	0	0	0	0	0	0	0	0	0	0	0	0	0	0	0	0	0	0	0	0	0	0
621	ST_55	CGTCCATCTACG	GGACTAGCAGGGTATCTAAT	CCTGATCGTCCCATAGATTA	806F_v30	GGACTATCAGGGGATCTATT	3	C/T	A/G	T/T	57.5		806Syn_30_ST_10	0	0	0	0	0	0	0	0	0	0	0	0	0	0	0	0	0	0	0	0	0	0	0	0	0	0	0	0	0	0	0	0	0	0	0	0
622	ST_55	CGTCCATCTACG	GGACTAGCAGGGTATCTAAT	CCTGATCGTCCCATAGATTA	806F_v32	GGACTATCAGGGGATCTAGT	3	C/T	A/G	T/G	59.2		806Syn_32_ST_10	0	0	0	0	0	0	0	0	0	0	0	0	0	0	0	0	0	0	0	0	0	0	0	0	0	0	0	0	0	0	0	0	0	0	0	0
623	ST_55	CGTCCATCTACG	GGACTAGCAGGGTATCTAAT	CCTGATCGTCCCATAGATTA	806F_v33	GGACTAACAGGGCATCTACT	3	C/A	A/C	T/C	60.5		806Syn_33_ST_10	0	0	0	0	0	0	0	0	0	0	0	0	0	0	0	0	0	0	0	0	0	0	0	0	0	0	0	0	0	0	0	0	0	0	0	0
624	ST_55	CGTCCATCTACG	GGACTAGCAGGGTATCTAAT	CCTGATCGTCCCATAGATTA	806F_v34	GGACTAACAGGGCATCTATT	3	C/A	A/C	T/T	58.9		806Syn_34_ST_10	0	0	0	0	0	0	0	0	0	0	0	0	0	0	0	0	0	0	0	0	0	0	0	0	0	0	0	0	0	0	0	0	0	0	0	0
625	ST_55	CGTCCATCTACG	GGACTAGCAGGGTATCTAAT	CCTGATCGTCCCATAGATTA	806F_v36	GGACTAACAGGGCATCTAGT	3	C/A	A/C	T/G	60.5		806Syn_36_ST_10	0	0	0	0	0	0	0	0	0	0	0	0	0	0	0	0	0	0	0	0	0	0	0	0	0	0	0	0	0	0	0	0	0	0	0	0
626	ST_55	CGTCCATCTACG	GGACTAGCAGGGTATCTAAT	CCTGATCGTCCCATAGATTA	806F_v41	GGACTAACAGGGAATCTACT	3	C/A	A/A	T/C	57.9		806Syn_41_ST_10	0	0	0	0	0	0	0	0	0	0	0	0	0	0	0	0	0	0	0	0	0	0	0	0	0	0	0	0	0	0	0	0	0	0	0	0
627	ST_55	CGTCCATCTACG	GGACTAGCAGGGTATCTAAT	CCTGATCGTCCCATAGATTA	806F_v42	GGACTAACAGGGAATCTATT	3	C/A	A/A	T/T	56.2		806Syn_42_ST_10	0	0	0	0	0	0	0	0	0	0	0	0	0	0	0	0	0	0	0	0	0	0	0	0	0	0	0	0	0	0	0	0	0	0	0	0
628	ST_55	CGTCCATCTACG	GGACTAGCAGGGTATCTAAT	CCTGATCGTCCCATAGATTA	806F_v44	GGACTAACAGGGAATCTAGT	3	C/A	A/A	T/G	57.9		806Syn_44_ST_10	0	0	0	0	0	0	0	0	0	0	0	0	0	0	0	0	0	0	0	0	0	0	0	0	0	0	0	0	0	0	0	0	0	0	0	0
629	ST_55	CGTCCATCTACG	GGACTAGCAGGGTATCTAAT	CCTGATCGTCCCATAGATTA	806F_v45	GGACTAACAGGGGATCTACT	3	C/A	A/G	T/C	59.7		806Syn_45_ST_10	0	0	0	0	0	0	0	0	0	0	0	0	0	0	0	0	0	0	0	0	0	0	0	0	0	0	0	0	0	0	0	0	0	0	0	0
630	ST_55	CGTCCATCTACG	GGACTAGCAGGGTATCTAAT	CCTGATCGTCCCATAGATTA	806F_v46	GGACTAACAGGGGATCTATT	3	C/A	A/G	T/T	58		806Syn_46_ST_10	0	0	0	0	0	0	0	0	0	0	0	0	0	0	0	0	0	0	0	0	0	0	0	0	0	0	0	0	0	0	0	0	0	0	0	0
631	ST_55	CGTCCATCTACG	GGACTAGCAGGGTATCTAAT	CCTGATCGTCCCATAGATTA	806F_v48	GGACTAACAGGGGATCTAGT	3	C/A	A/G	T/G	59.7		806Syn_48_ST_10	0	0	0	0	0	0	0	0	0	0	0	0	0	0	0	0	0	0	0	0	0	0	0	0	0	0	0	0	0	0	0	0	0	0	0	0
632	ST_55	CGTCCATCTACG	GGACTAGCAGGGTATCTAAT	CCTGATCGTCCCATAGATTA	806F_v49	GGACTAGCAGGGCATCTACT	2		A/C	T/C	62.6		806Syn_49_ST_10	0	0	0	0	0	0	0	0	0	0	0	0	0	0	0	0	0	0	0	0	0	0	0	0	0	0	0	0	0	0	0	0	0	0	0	0
633	ST_55	CGTCCATCTACG	GGACTAGCAGGGTATCTAAT	CCTGATCGTCCCATAGATTA	806F_v50	GGACTAGCAGGGCATCTATT	2		A/C	T/T	60.9		806Syn_50_ST_10	0	0	0	0	0	0	0	0	0	0	0	0	0	0	0	0	0	0	0	0	0	0	0	0	0	0	0	0	0	0	0	0	0	0	0	0
634	ST_55	CGTCCATCTACG	GGACTAGCAGGGTATCTAAT	CCTGATCGTCCCATAGATTA	806F_v52	GGACTAGCAGGGCATCTAGT	2		A/C	T/G	62.6		806Syn_52_ST_10	0	0	0	0	0	0	0	0	0	0	0	0	0	0	0	0	0	0	0	0	0	0	0	0	0	0	0	0	0	0	0	0	0	0	0	0
635	ST_55	CGTCCATCTACG	GGACTAGCAGGGTATCTAAT	CCTGATCGTCCCATAGATTA	806F_v57	GGACTAGCAGGGAATCTACT	2		A/A	T/C	60		806Syn_57_ST_10	0	0	0	0	0	0	0	0	0	0	0	0	0	0	0	0	0	0	0	0	0	0	0	0	0	0	0	0	0	0	0	0	0	0	0	0
636	ST_55	CGTCCATCTACG	GGACTAGCAGGGTATCTAAT	CCTGATCGTCCCATAGATTA	806F_v58	GGACTAGCAGGGAATCTATT	2		A/A	T/T	58.3		806Syn_58_ST_10	0	0	0	0	0	0	0	0	0	0	0	0	0	0	0	0	0	0	0	0	0	0	0	0	0	0	0	0	0	0	0	0	0	0	0	0
637	ST_55	CGTCCATCTACG	GGACTAGCAGGGTATCTAAT	CCTGATCGTCCCATAGATTA	806F_v60	GGACTAGCAGGGAATCTAGT	2		A/A	T/G	60		806Syn_60_ST_10	0	0	0	0	0	0	0	0	0	0	0	0	0	0	0	0	0	0	0	0	0	0	0	0	0	0	0	0	0	0	0	0	0	0	0	0
638	ST_55	CGTCCATCTACG	GGACTAGCAGGGTATCTAAT	CCTGATCGTCCCATAGATTA	806F_v61	GGACTAGCAGGGGATCTACT	2		A/G	T/C	61.7		806Syn_61_ST_10	0	0	0	0	0	0	0	0	0	0	0	0	0	0	0	0	0	0	0	0	0	0	0	0	0	0	0	0	0	0	0	0	0	0	0	0
639	ST_55	CGTCCATCTACG	GGACTAGCAGGGTATCTAAT	CCTGATCGTCCCATAGATTA	806F_v62	GGACTAGCAGGGGATCTATT	2		A/G	T/T	60.1		806Syn_62_ST_10	0	0	0	0	0	0	0	0	0	0	0	0	0	0	0	0	0	0	0	0	0	0	0	0	0	0	0	0	0	0	0	0	0	0	0	0
640	ST_55	CGTCCATCTACG	GGACTAGCAGGGTATCTAAT	CCTGATCGTCCCATAGATTA	806F_v64	GGACTAGCAGGGGATCTAGT	2		A/G	T/G	61.7		806Syn_64_ST_10	0	0	0	0	0	0	0	0	0	0	0	0	0	0	0	0	0	0	0	0	0	0	0	0	0	0	0	0	0	0	0	0	0	0	0	0
[truncated: 467 more columns]
