# Supplementary material for: Quantitating primer-template interactions using deconstructed PCR
Source: PeerJ. 2024 Aug 8;12:e17787. doi: 10.7717/peerj.17787 (PMC11317036; doi:10.7717/peerj.17787)
Supplement: Table S5 [file peerj-12-17787-s007.xlsx]

## Sheet: Table S5 Meta Data
Bioproject Accession	SampleID	Biosample Accession	Initial Exp Name	Current Exp Name	PCR Method	Enz	Annealing Temp	group	Rpl	Barcode Name	Barcode Sequence	Input DNA Template	gDNA Conc (ng/ul)	Raw Reads	Merged Reads	Trimmed	Rarefaction	Mismatch Ratio	Shannon	Ideal Score	Primer Ideal Score	File Name
PRJNA513137	A1-45-1	SAMN10696615	A1	A01	DePCR	MT	45C	A	1	FLD0001	GTATCGTCGT	A	2.5	28286	27923	22817	7000	NA	0.281753	0.0857143	NA	A01_DePCR_45C_MT_A_1_.fastq
PRJNA513137	A1-45-2	SAMN10696616	A1	A01	DePCR	MT	45C	A	2	FLD0002	GTGTATGCGT	A	2.5	27630	27230	22095	7000	NA	0.244679	0.171429	NA	A01_DePCR_45C_MT_A_2_.fastq
PRJNA513137	A1-45-3	SAMN10696617	A1	A01	DePCR	MT	45C	A	3	FLD0003	TGCTCGTAGT	A	2.5	21137	20852	16965	7000	NA	0.250583	0.228571	NA	A01_DePCR_45C_MT_A_3_.fastq
PRJNA513137	A1-45-4	SAMN10696618	A1	A01	DePCR	MT	45C	A	4	FLD0004	GTCGTCGTCT	A	2.5	22604	22264	18145	7000	NA	0.236653	0.0571429	NA	A01_DePCR_45C_MT_A_4_.fastq
PRJNA513137	A1-45-5	SAMN10696619	A1	A01	DePCR	MT	45C	A	5	FLD0005	GTGCGTGTGT	A	2.5	27497	27071	21900	7000	NA	0.311902	0.285714	NA	A01_DePCR_45C_MT_A_5_.fastq
PRJNA513137	A1-45-6	SAMN10696620	A1	A01	DePCR	MT	45C	A	6	FLD0006	GCGTCGTGTA	A	2.5	30594	30146	24423	7000	NA	0.224159	0.0285714	NA	A01_DePCR_45C_MT_A_6_.fastq
PRJNA513137	A1-45-7	SAMN10696621	A1	A01	DePCR	MT	45C	A	7	FLD0007	GTCGTGTACT	A	2.5	24900	24532	19854	7000	NA	0.228549	0.2	NA	A01_DePCR_45C_MT_A_7_.fastq
PRJNA513137	A1-45-8	SAMN10696622	A1	A01	DePCR	MT	45C	A	8	FLD0008	GATGTAGCGT	A	2.5	24892	24537	19878	7000	NA	0.265349	0.114286	NA	A01_DePCR_45C_MT_A_8_.fastq
PRJNA513137	A1-55-1	SAMN10696623	A1	A01	DePCR	MT	55C	A	1	FLD0193	TTGTTGCTGT	A	2.5	26736	26383	21328	7000	NA	0.261455	0.285714	NA	A01_DePCR_55C_MT_A_1_.fastq
PRJNA513137	A1-55-2	SAMN10696624	A1	A01	DePCR	MT	55C	A	2	FLD0194	GTGTGGTTGT	A	2.5	28474	28050	22900	7000	NA	0.25637	0.285714	NA	A01_DePCR_55C_MT_A_2_.fastq
PRJNA513137	A1-55-3	SAMN10696625	A1	A01	DePCR	MT	55C	A	3	FLD0195	TAGGTGGAAT	A	2.5	22295	21994	17833	7000	NA	0.258671	0.114286	NA	A01_DePCR_55C_MT_A_3_.fastq
PRJNA513137	A1-55-4	SAMN10696626	A1	A01	DePCR	MT	55C	A	4	FLD0196	TGTAGGTGGA	A	2.5	25461	25125	20214	7000	NA	0.26958	0.314286	NA	A01_DePCR_55C_MT_A_4_.fastq
PRJNA513137	A1-55-5	SAMN10696627	A1	A01	DePCR	MT	55C	A	5	FLD0197	TTAGTGGTGA	A	2.5	22265	21955	17755	7000	NA	0.304065	0.142857	NA	A01_DePCR_55C_MT_A_5_.fastq
PRJNA513137	A1-55-6	SAMN10696628	A1	A01	DePCR	MT	55C	A	6	FLD0198	GTGAAGGTAA	A	2.5	31800	31385	25576	7000	NA	0.286116	0.342857	NA	A01_DePCR_55C_MT_A_6_.fastq
PRJNA513137	A1-55-7	SAMN10696629	A1	A01	DePCR	MT	55C	A	7	FLD0199	TGTTGTGGTA	A	2.5	22893	22595	18527	7000	NA	0.260888	NA	NA	A01_DePCR_55C_MT_A_7_.fastq
PRJNA513137	A1-55-8	SAMN10696630	A1	A01	DePCR	MT	55C	A	8	FLD0200	GTTGATGAGT	A	2.5	36120	35654	29575	7000	NA	0.234316	0.0857143	NA	A01_DePCR_55C_MT_A_8_.fastq
PRJNA513137	A1S-45-1	SAMN10696871	A1	A01	TAS	MT	45C	A	1	FLD0097	TGCTACATCA	A	2.5	21162	21069	18928	7000	NA	0.0741696	0.0285714	NA	A01_TAS_45C_MT_A_1_.fastq
PRJNA513137	A1S-45-2	SAMN10696872	A1	A01	TAS	MT	45C	A	2	FLD0098	AGTGTGTCTA	A	2.5	23554	23455	21071	7000	NA	0.0925725	0.0571429	NA	A01_TAS_45C_MT_A_2_.fastq
PRJNA513137	A1S-45-3	SAMN10696873	A1	A01	TAS	MT	45C	A	3	FLD0099	TCATATCGCG	A	2.5	18339	18241	16218	7000	NA	0.0777361	0.0571429	NA	A01_TAS_45C_MT_A_3_.fastq
PRJNA513137	A1S-45-4	SAMN10696874	A1	A01	TAS	MT	45C	A	4	FLD0100	TACGTATAGC	A	2.5	18628	18518	16500	7000	NA	0.0944414	0.0285714	NA	A01_TAS_45C_MT_A_4_.fastq
PRJNA513137	A1S-45-5	SAMN10696875	A1	A01	TAS	MT	45C	A	5	FLD0101	CAGCTATAGC	A	2.5	20856	20753	18500	7000	NA	0.0941205	0.0857143	NA	A01_TAS_45C_MT_A_5_.fastq
PRJNA513137	A1S-45-6	SAMN10696876	A1	A01	TAS	MT	45C	A	6	FLD0102	TCGATGCGCT	A	2.5	20893	20803	18596	7000	NA	0.0703296	0.114286	NA	A01_TAS_45C_MT_A_6_.fastq
PRJNA513137	A1S-45-7	SAMN10696877	A1	A01	TAS	MT	45C	A	7	FLD0103	GCACGCGTAT	A	2.5	20679	20561	18366	7000	NA	0.0878397	NA	NA	A01_TAS_45C_MT_A_7_.fastq
PRJNA513137	A1S-45-8	SAMN10696878	A1	A01	TAS	MT	45C	A	8	FLD0104	GCAGTATGCG	A	2.5	20538	20430	18104	7000	NA	0.0805687	NA	NA	A01_TAS_45C_MT_A_8_.fastq
PRJNA513137	A1S-55-1	SAMN10696879	A1	A01	TAS	MT	55C	A	1	FLD0137	ACGTATCATC	A	2.5	21705	21594	19334	7000	NA	0.102783	0.114286	NA	A01_TAS_55C_MT_A_1_.fastq
PRJNA513137	A1S-55-2	SAMN10696880	A1	A01	TAS	MT	55C	A	2	FLD0138	AGTATCGTAC	A	2.5	22729	22606	20223	7000	NA	0.103607	0.0285714	NA	A01_TAS_55C_MT_A_2_.fastq
PRJNA513137	A1S-55-3	SAMN10696881	A1	A01	TAS	MT	55C	A	3	FLD0139	GATACACTGA	A	2.5	20035	19943	17919	7000	NA	0.0842465	0.114286	NA	A01_TAS_55C_MT_A_3_.fastq
PRJNA513137	A1S-55-4	SAMN10696882	A1	A01	TAS	MT	55C	A	4	FLD0140	GACTAGTCAG	A	2.5	20468	20364	18236	7000	NA	0.0761771	0.0857143	NA	A01_TAS_55C_MT_A_4_.fastq
PRJNA513137	A1S-55-5	SAMN10696883	A1	A01	TAS	MT	55C	A	5	FLD0141	GATGACTACG	A	2.5	19739	19639	17553	7000	NA	0.0797999	NA	NA	A01_TAS_55C_MT_A_5_.fastq
PRJNA513137	A1S-55-6	SAMN10696884	A1	A01	TAS	MT	55C	A	6	FLD0142	CAGAGAGTCA	A	2.5	19005	18940	16992	7000	NA	0.0826641	0.0571429	NA	A01_TAS_55C_MT_A_6_.fastq
PRJNA513137	A1S-55-7	SAMN10696885	A1	A01	TAS	MT	55C	A	7	FLD0143	TCGATCGACA	A	2.5	19778	19678	17605	7000	NA	0.0858262	0.0571429	NA	A01_TAS_55C_MT_A_7_.fastq
PRJNA513137	A1S-55-8	SAMN10696886	A1	A01	TAS	MT	55C	A	8	FLD0144	ACTGATGTAG	A	2.5	20099	19969	17923	7000	NA	0.0972994	0.0571429	NA	A01_TAS_55C_MT_A_8_.fastq
PRJNA513137	A3-45-1	SAMN10696647	A3	A09	DePCR	MT	45C	A	1	FLD0009	GAGTGATCGT	A	2.5	26209	25875	21104	7000	Inf	2.31117	0.142857	37.288	A09_DePCR_45C_MT_A_1_.fastq
PRJNA513137	A3-45-2	SAMN10696648	A3	A09	DePCR	MT	45C	A	2	FLD0010	CGCTATCAGT	A	2.5	10636	10485	8410	7000	Inf	2.33468	0.228571	34.6168	A09_DePCR_45C_MT_A_2_.fastq
PRJNA513137	A3-45-3	SAMN10696649	A3	A09	DePCR	MT	45C	A	3	FLD0011	CGCTGTAGTC	A	2.5	13271	13104	10504	7000	Inf	2.32245	0.142857	39.3619	A09_DePCR_45C_MT_A_3_.fastq
PRJNA513137	A3-45-4	SAMN10696650	A3	A09	DePCR	MT	45C	A	4	FLD0012	GCTAGTGAGT	A	2.5	25609	25282	20599	7000	Inf	2.2955	0.142857	39.5285	A09_DePCR_45C_MT_A_4_.fastq
PRJNA513137	A3-45-5	SAMN10696651	A3	A09	DePCR	MT	45C	A	5	FLD0013	GAGCTAGTGA	A	2.5	24160	23869	19279	7000	Inf	2.30756	0.457143	37.1347	A09_DePCR_45C_MT_A_5_.fastq
PRJNA513137	A3-45-6	SAMN10696652	A3	A09	DePCR	MT	45C	A	6	FLD0014	CGTGCTGTCA	A	2.5	17036	16837	13503	7000	Inf	2.3217	0.114286	35.6137	A09_DePCR_45C_MT_A_6_.fastq
PRJNA513137	A3-45-7	SAMN10696653	A3	A09	DePCR	MT	45C	A	7	FLD0015	GATCGTCTCT	A	2.5	24371	24114	19782	7000	Inf	2.31337	0.285714	35.3091	A09_DePCR_45C_MT_A_7_.fastq
PRJNA513137	A3-45-8	SAMN10696654	A3	A09	DePCR	MT	45C	A	8	FLD0016	GTGCTGTCGT	A	2.5	27262	26922	21774	7000	Inf	2.2996	0.257143	39.5911	A09_DePCR_45C_MT_A_8_.fastq
PRJNA513137	A3-55-1	SAMN10696655	A3	A09	DePCR	MT	55C	A	1	FLD0201	GGTCAGTGTA	A	2.5	43420	42934	34962	7000	Inf	2.25016	0.971429	48.3099	A09_DePCR_55C_MT_A_1_.fastq
PRJNA513137	A3-55-2	SAMN10696656	A3	A09	DePCR	MT	55C	A	2	FLD0202	GTAATGGAGT	A	2.5	38711	38223	31164	7000	Inf	2.28178	0.0857143	47.8467	A09_DePCR_55C_MT_A_2_.fastq
PRJNA513137	A3-55-3	SAMN10696657	A3	A09	DePCR	MT	55C	A	3	FLD0203	CTCGTTATTC	A	2.5	24514	24277	19809	7000	Inf	2.26135	0.114286	46.0779	A09_DePCR_55C_MT_A_3_.fastq
PRJNA513137	A3-55-4	SAMN10696658	A3	A09	DePCR	MT	55C	A	4	FLD0204	GGAAGTAAGG	A	2.5	40211	39756	31960	7000	Inf	2.25887	0.0571429	46.8285	A09_DePCR_55C_MT_A_4_.fastq
PRJNA513137	A3-55-5	SAMN10696659	A3	A09	DePCR	MT	55C	A	5	FLD0205	CGGTGTGTGT	A	2.5	26713	26398	21108	7000	Inf	2.25784	0.0571429	48.9677	A09_DePCR_55C_MT_A_5_.fastq
PRJNA513137	A3-55-6	SAMN10696660	A3	A09	DePCR	MT	55C	A	6	FLD0206	CGTCTTCTTA	A	2.5	23891	23632	19512	7000	Inf	2.24463	0.657143	47.2277	A09_DePCR_55C_MT_A_6_.fastq
PRJNA513137	A3-55-7	SAMN10696661	A3	A09	DePCR	MT	55C	A	7	FLD0207	TGTGAATCTC	A	2.5	33895	33582	27555	7000	Inf	2.25654	0.4	49.2734	A09_DePCR_55C_MT_A_7_.fastq
PRJNA513137	A3-55-8	SAMN10696662	A3	A09	DePCR	MT	55C	A	8	FLD0208	CTAATCGTGT	A	2.5	26669	26396	21373	7000	Inf	2.26348	0.0857143	49.7948	A09_DePCR_55C_MT_A_8_.fastq
PRJNA513137	A3S-45-1	SAMN10696903	A3	A09	TAS	MT	45C	A	1	FLD0105	TGATAGAGAG	A	2.5	20697	20591	18357	7000	Inf	2.3512	0.0857143	21.182	A09_TAS_45C_MT_A_1_.fastq
PRJNA513137	A3S-45-2	SAMN10696904	A3	A09	TAS	MT	45C	A	2	FLD0106	GCTACTAGCG	A	2.5	18696	18596	16441	7000	Inf	2.33714	0.0285714	21.6555	A09_TAS_45C_MT_A_2_.fastq
PRJNA513137	A3S-45-3	SAMN10696905	A3	A09	TAS	MT	45C	A	3	FLD0107	TGCGAGACGT	A	2.5	18170	18081	15895	7000	Inf	2.33856	0.0285714	21.376	A09_TAS_45C_MT_A_3_.fastq
PRJNA513137	A3S-45-4	SAMN10696906	A3	A09	TAS	MT	45C	A	4	FLD0108	CGATGACAGA	A	2.5	19422	19315	17145	7000	Inf	2.34312	0.0285714	20.921	A09_TAS_45C_MT_A_4_.fastq
PRJNA513137	A3S-45-5	SAMN10696907	A3	A09	TAS	MT	45C	A	5	FLD0109	GACTCATGCT	A	2.5	19705	19618	17578	7000	Inf	2.34255	0.0857143	22.4721	A09_TAS_45C_MT_A_5_.fastq
PRJNA513137	A3S-45-6	SAMN10696908	A3	A09	TAS	MT	45C	A	6	FLD0110	GTCTGATACG	A	2.5	17805	17722	15748	7000	Inf	2.35138	0.0285714	22.4541	A09_TAS_45C_MT_A_6_.fastq
PRJNA513137	A3S-45-7	SAMN10696909	A3	A09	TAS	MT	45C	A	7	FLD0111	ACTAGCTGTC	A	2.5	21754	21645	19294	7000	Inf	2.34802	0.0285714	22.7634	A09_TAS_45C_MT_A_7_.fastq
PRJNA513137	A3S-45-8	SAMN10696910	A3	A09	TAS	MT	45C	A	8	FLD0112	GCGTAGACGA	A	2.5	18668	18573	16453	7000	Inf	2.33826	NA	20.74	A09_TAS_45C_MT_A_8_.fastq
PRJNA513137	A3S-55-1	SAMN10696911	A3	A09	TAS	MT	55C	A	1	FLD0145	ACTCGATAGT	A	2.5	22110	21990	19567	7000	Inf	2.34112	0.142857	21.3749	A09_TAS_55C_MT_A_1_.fastq
PRJNA513137	A3S-55-2	SAMN10696912	A3	A09	TAS	MT	55C	A	2	FLD0146	GACGATCGCA	A	2.5	20506	20398	18092	7000	Inf	2.34425	0.114286	20.0812	A09_TAS_55C_MT_A_2_.fastq
PRJNA513137	A3S-55-3	SAMN10696913	A3	A09	TAS	MT	55C	A	3	FLD0147	TCATCATGCG	A	2.5	19934	19848	17601	7000	Inf	2.35578	0.0285714	19.3212	A09_TAS_55C_MT_A_3_.fastq
PRJNA513137	A3S-55-4	SAMN10696914	A3	A09	TAS	MT	55C	A	4	FLD0148	ACATGTCTGA	A	2.5	21140	21011	18679	7000	Inf	2.35244	0.142857	19.5393	A09_TAS_55C_MT_A_4_.fastq
PRJNA513137	A3S-55-5	SAMN10696915	A3	A09	TAS	MT	55C	A	5	FLD0149	AGTCATCGCA	A	2.5	22327	22210	19751	7000	Inf	2.35022	0.0857143	20.7471	A09_TAS_55C_MT_A_5_.fastq
PRJNA513137	A3S-55-6	SAMN10696916	A3	A09	TAS	MT	55C	A	6	FLD0150	TAGCATACAG	A	2.5	16712	16616	14385	7000	Inf	2.35185	0.0285714	20.9903	A09_TAS_55C_MT_A_6_.fastq
PRJNA513137	A3S-55-7	SAMN10696917	A3	A09	TAS	MT	55C	A	7	FLD0151	AGAGTCGCGT	A	2.5	20917	20823	18413	7000	Inf	2.35713	0.0285714	20.463	A09_TAS_55C_MT_A_7_.fastq
PRJNA513137	A3S-55-8	SAMN10696918	A3	A09	TAS	MT	55C	A	8	FLD0152	TCTACGACAT	A	2.5	19382	19294	17195	7000	Inf	2.33706	0.142857	20.6236	A09_TAS_55C_MT_A_8_.fastq
PRJNA513137	A2-45-1	SAMN10696631	A2	A10	DePCR	MT	45C	A	1	FLD0017	TGAGCGTGCT	A	2.5	17976	17790	14232	7000	3.20965	2.30295	0.2	43.6135	A10_DePCR_45C_MT_A_1_.fastq
PRJNA513137	A2-45-2	SAMN10696632	A2	A10	DePCR	MT	45C	A	2	FLD0018	CATGTCGTCA	A	2.5	12633	12485	10117	7000	3.63403	2.32468	0.142857	39.1035	A10_DePCR_45C_MT_A_2_.fastq
PRJNA513137	A2-45-3	SAMN10696633	A2	A10	DePCR	MT	45C	A	3	FLD0019	TCAGTGTCTC	A	2.5	15576	15423	12408	7000	3.49346	2.29892	0.257143	43.1118	A10_DePCR_45C_MT_A_3_.fastq
PRJNA513137	A2-45-4	SAMN10696634	A2	A10	DePCR	MT	45C	A	4	FLD0020	GTGCTCATGT	A	2.5	17686	17496	14100	7000	3.28474	2.31401	0.457143	45.8561	A10_DePCR_45C_MT_A_4_.fastq
PRJNA513137	A2-45-5	SAMN10696635	A2	A10	DePCR	MT	45C	A	5	FLD0021	CGTATCTCGA	A	2.5	12402	12269	9850	7000	3.29522	2.32725	0.628571	43.7643	A10_DePCR_45C_MT_A_5_.fastq
PRJNA513137	A2-45-6	SAMN10696636	A2	A10	DePCR	MT	45C	A	6	FLD0022	GTCATGCGTC	A	2.5	22081	21815	17380	7000	3.67756	2.30737	0.514286	41.7643	A10_DePCR_45C_MT_A_6_.fastq
PRJNA513137	A2-45-7	SAMN10696637	A2	A10	DePCR	MT	45C	A	7	FLD0023	CTATGCGATC	A	2.5	14770	14622	11698	7000	3.31613	2.30951	0.228571	44.2585	A10_DePCR_45C_MT_A_7_.fastq
PRJNA513137	A2-45-8	SAMN10696638	A2	A10	DePCR	MT	45C	A	8	FLD0024	TGCTATGCTG	A	2.5	20548	20343	16420	7000	3.45627	2.33228	0.457143	42.5226	A10_DePCR_45C_MT_A_8_.fastq
PRJNA513137	A2-55-1	SAMN10696639	A2	A10	DePCR	MT	55C	A	1	FLD0209	CTCTTAGTTC	A	2.5	25170	24914	20118	7000	3.13398	2.25672	0.2	53.3114	A10_DePCR_55C_MT_A_1_.fastq
PRJNA513137	A2-55-2	SAMN10696640	A2	A10	DePCR	MT	55C	A	2	FLD0210	GGATAGGATC	A	2.5	36725	36354	29256	7000	3.09556	2.23266	0.2	53.1229	A10_DePCR_55C_MT_A_2_.fastq
PRJNA513137	A2-55-3	SAMN10696641	A2	A10	DePCR	MT	55C	A	3	FLD0211	GGTGTCTTGT	A	2.5	35953	35551	29014	7000	3.2272	2.2467	0.2	55.5198	A10_DePCR_55C_MT_A_3_.fastq
PRJNA513137	A2-55-4	SAMN10696642	A2	A10	DePCR	MT	55C	A	4	FLD0212	GATGGTTGTA	A	2.5	34298	33952	27604	7000	3.03283	2.26052	0.0857143	52.8476	A10_DePCR_55C_MT_A_4_.fastq
PRJNA513137	A2-55-5	SAMN10696643	A2	A10	DePCR	MT	55C	A	5	FLD0213	CCTCGTTGTT	A	2.5	26826	26535	21587	7000	3.07532	2.23738	0.114286	57.1481	A10_DePCR_55C_MT_A_5_.fastq
PRJNA513137	A2-55-6	SAMN10696644	A2	A10	DePCR	MT	55C	A	6	FLD0214	GGTTGGAGTT	A	2.5	48675	48151	39122	7000	2.99368	2.25864	0.0571429	58.0892	A10_DePCR_55C_MT_A_6_.fastq
PRJNA513137	A2-55-7	SAMN10696645	A2	A10	DePCR	MT	55C	A	7	FLD0215	TGGTGTCCGT	A	2.5	28399	28109	22346	7000	3.12323	2.25762	0.114286	54.4151	A10_DePCR_55C_MT_A_7_.fastq
PRJNA513137	A2-55-8	SAMN10696646	A2	A10	DePCR	MT	55C	A	8	FLD0216	CGTTAGCGTA	A	2.5	25751	25479	20644	7000	3.17703	2.27221	0.142857	55.776	A10_DePCR_55C_MT_A_8_.fastq
PRJNA513137	A2S-45-1	SAMN10696887	A2	A10	TAS	MT	45C	A	1	FLD0113	CTCAGCAGTG	A	2.5	20614	20508	18161	7000	6.56777	2.28272	0.0285714	19.2921	A10_TAS_45C_MT_A_1_.fastq
PRJNA513137	A2S-45-2	SAMN10696888	A2	A10	TAS	MT	45C	A	2	FLD0114	CAGTCTACAT	A	2.5	18757	18658	16689	7000	7.0101	2.28533	0.0571429	19.9748	A10_TAS_45C_MT_A_2_.fastq
PRJNA513137	A2S-45-3	SAMN10696889	A2	A10	TAS	MT	45C	A	3	FLD0115	TACTGCAGCG	A	2.5	19335	19252	17121	7000	6.8306	2.29083	0.0571429	20.9972	A10_TAS_45C_MT_A_3_.fastq
PRJNA513137	A2S-45-4	SAMN10696890	A2	A10	TAS	MT	45C	A	4	FLD0116	TACACAGTAG	A	2.5	17537	17451	15449	7000	6.45829	2.2921	0.0571429	19.8398	A10_TAS_45C_MT_A_4_.fastq
PRJNA513137	A2S-45-5	SAMN10696891	A2	A10	TAS	MT	45C	A	5	FLD0117	CACATACAGT	A	2.5	20631	20490	18209	7000	6.62936	2.27427	0.0285714	20.1474	A10_TAS_45C_MT_A_5_.fastq
PRJNA513137	A2S-45-6	SAMN10696892	A2	A10	TAS	MT	45C	A	6	FLD0118	CACAGTGATG	A	2.5	16833	16741	14791	7000	6.84016	2.2806	NA	20.2553	A10_TAS_45C_MT_A_6_.fastq
PRJNA513137	A2S-45-7	SAMN10696893	A2	A10	TAS	MT	45C	A	7	FLD0119	CGAGCTAGCA	A	2.5	17134	17036	15120	7000	6.95077	2.28736	0.0857143	19.3302	A10_TAS_45C_MT_A_7_.fastq
PRJNA513137	A2S-45-8	SAMN10696894	A2	A10	TAS	MT	45C	A	8	FLD0120	GAGACTATGC	A	2.5	16176	16115	14231	7000	6.87678	2.28572	0.0857143	18.9057	A10_TAS_45C_MT_A_8_.fastq
PRJNA513137	A2S-55-1	SAMN10696895	A2	A10	TAS	MT	55C	A	1	FLD0153	CACGAGATGA	A	2.5	20339	20226	17853	7000	6.72746	2.29193	NA	19.3339	A10_TAS_55C_MT_A_1_.fastq
PRJNA513137	A2S-55-2	SAMN10696896	A2	A10	TAS	MT	55C	A	2	FLD0154	ACGCACATAT	A	2.5	20961	20823	18510	7000	6.38454	2.29037	0.0571429	19.0972	A10_TAS_55C_MT_A_2_.fastq
PRJNA513137	A2S-55-3	SAMN10696897	A2	A10	TAS	MT	55C	A	3	FLD0155	ACGTGCTCTG	A	2.5	19456	19325	17212	7000	6.63167	2.28793	NA	19.9539	A10_TAS_55C_MT_A_3_.fastq
PRJNA513137	A2S-55-4	SAMN10696898	A2	A10	TAS	MT	55C	A	4	FLD0156	ACGATCACAT	A	2.5	21133	21016	18691	7000	6.84541	2.31221	0.285714	18.1034	A10_TAS_55C_MT_A_4_.fastq
PRJNA513137	A2S-55-5	SAMN10696899	A2	A10	TAS	MT	55C	A	5	FLD0157	AGTGTACTCA	A	2.5	22405	22282	19881	7000	6.60108	2.30557	0.171429	20.1988	A10_TAS_55C_MT_A_5_.fastq
PRJNA513137	A2S-55-6	SAMN10696900	A2	A10	TAS	MT	55C	A	6	FLD0158	TGATGTATGT	A	2.5	18228	18147	16181	7000	6.43519	2.27427	0.114286	19.5014	A10_TAS_55C_MT_A_6_.fastq
PRJNA513137	A2S-55-7	SAMN10696901	A2	A10	TAS	MT	55C	A	7	FLD0159	GATATATGTC	A	2.5	20822	20719	18577	7000	6.79117	2.29335	0.0857143	19.8536	A10_TAS_55C_MT_A_7_.fastq
PRJNA513137	A2S-55-8	SAMN10696902	A2	A10	TAS	MT	55C	A	8	FLD0160	TAGTACTAGA	A	2.5	18107	18029	16175	7000	6.71245	2.28378	0.0857143	18.1025	A10_TAS_55C_MT_A_8_.fastq
PRJNA513137	A4-45-1	SAMN10696663	A4	A27	DePCR	MT	45C	A	1	FLD0025	TGTGTGCATG	A	2.5	13399	13262	10357	7000	Inf	3.24447	0.257143	52.6485	A27_DePCR_45C_MT_A_1_.fastq
PRJNA513137	A4-45-2	SAMN10696664	A4	A27	DePCR	MT	45C	A	2	FLD0026	GAGTGTCACT	A	2.5	21108	20903	16722	7000	Inf	3.22469	0.228571	56.6344	A27_DePCR_45C_MT_A_2_.fastq
PRJNA513137	A4-45-3	SAMN10696665	A4	A27	DePCR	MT	45C	A	3	FLD0027	CTAGTCTCGT	A	2.5	14160	14026	11235	7000	Inf	3.27141	0.285714	48.8628	A27_DePCR_45C_MT_A_3_.fastq
PRJNA513137	A4-45-4	SAMN10696666	A4	A27	DePCR	MT	45C	A	4	FLD0028	GAGTGCATCT	A	2.5	16759	16601	13219	7000	Inf	3.21857	0.0857143	55.5716	A27_DePCR_45C_MT_A_4_.fastq
PRJNA513137	A4-45-5	SAMN10696667	A4	A27	DePCR	MT	45C	A	5	FLD0029	TGCGTAGTCG	A	2.5	17584	17399	13985	7000	Inf	3.25456	0.114286	48.9307	A27_DePCR_45C_MT_A_5_.fastq
PRJNA513137	A4-45-6	SAMN10696668	A4	A27	DePCR	MT	45C	A	6	FLD0030	CTGTGTCGTC	A	2.5	14909	14755	11646	7000	Inf	3.27364	0.142857	50.3014	A27_DePCR_45C_MT_A_6_.fastq
PRJNA513137	A4-45-7	SAMN10696669	A4	A27	DePCR	MT	45C	A	7	FLD0031	CTGTAGTGCG	A	2.5	12971	12827	9832	7000	Inf	3.27206	0.114286	48.0279	A27_DePCR_45C_MT_A_7_.fastq
PRJNA513137	A4-45-8	SAMN10696670	A4	A27	DePCR	MT	45C	A	8	FLD0032	GTGCGCTAGT	A	2.5	22953	22725	17909	7000	Inf	3.22476	0.457143	54.1141	A27_DePCR_45C_MT_A_8_.fastq
PRJNA513137	A4-55-1	SAMN10696671	A4	A27	DePCR	MT	55C	A	1	FLD0217	TACTAGGATC	A	2.5	25046	24801	19613	7000	Inf	2.60005	0.2	118.706	A27_DePCR_55C_MT_A_1_.fastq
PRJNA513137	A4-55-2	SAMN10696672	A4	A27	DePCR	MT	55C	A	2	FLD0218	GTCTCAATGT	A	2.5	26145	25909	20668	7000	Inf	2.60611	0.114286	116.725	A27_DePCR_55C_MT_A_2_.fastq
PRJNA513137	A4-55-3	SAMN10696673	A4	A27	DePCR	MT	55C	A	3	FLD0219	GATGAGGTAT	A	2.5	36776	36423	28723	7000	Inf	2.59318	0.0285714	116.746	A27_DePCR_55C_MT_A_3_.fastq
PRJNA513137	A4-55-4	SAMN10696674	A4	A27	DePCR	MT	55C	A	4	FLD0220	GGTGTTAGTG	A	2.5	34498	34136	27055	7000	Inf	2.60259	0.142857	115.406	A27_DePCR_55C_MT_A_4_.fastq
PRJNA513137	A4-55-5	SAMN10696675	A4	A27	DePCR	MT	55C	A	5	FLD0221	CATTCTCTGA	A	2.5	24559	24353	19177	7000	Inf	2.55582	0.314286	119.2	A27_DePCR_55C_MT_A_5_.fastq
PRJNA513137	A4-55-6	SAMN10696676	A4	A27	DePCR	MT	55C	A	6	FLD0222	CATCTGGAGT	A	2.5	27127	26876	21309	7000	Inf	2.54013	0.285714	122.33	A27_DePCR_55C_MT_A_6_.fastq
PRJNA513137	A4-55-7	SAMN10696677	A4	A27	DePCR	MT	55C	A	7	FLD0223	GAATGGAAGA	A	2.5	39819	39471	31305	7000	Inf	2.57901	0.142857	118.394	A27_DePCR_55C_MT_A_7_.fastq
PRJNA513137	A4-55-8	SAMN10696678	A4	A27	DePCR	MT	55C	A	8	FLD0224	GGCTGTGATC	A	2.5	38638	38257	30041	7000	Inf	2.58843	0.0285714	116.743	A27_DePCR_55C_MT_A_8_.fastq
PRJNA513137	A4S-45-1	SAMN10696919	A4	A27	TAS	MT	45C	A	1	FLD0121	CAGAGCTAGT	A	2.5	21094	21005	18490	7000	Inf	3.38095	0.2	22.1028	A27_TAS_45C_MT_A_1_.fastq
PRJNA513137	A4S-45-2	SAMN10696920	A4	A27	TAS	MT	45C	A	2	FLD0122	CGCAGAGCAT	A	2.5	20385	20277	17633	7000	Inf	3.38762	0.2	24.0605	A27_TAS_45C_MT_A_2_.fastq
PRJNA513137	A4S-45-3	SAMN10696921	A4	A27	TAS	MT	45C	A	3	FLD0123	TGTACAGCGA	A	2.5	18246	18154	15859	7000	Inf	3.36062	0.0285714	24.1073	A27_TAS_45C_MT_A_3_.fastq
PRJNA513137	A4S-45-4	SAMN10696922	A4	A27	TAS	MT	45C	A	4	FLD0124	ACGTCAGTAT	A	2.5	20656	20526	18114	7000	Inf	3.3791	0.0857143	24.0485	A27_TAS_45C_MT_A_4_.fastq
PRJNA513137	A4S-45-5	SAMN10696923	A4	A27	TAS	MT	45C	A	5	FLD0125	TCACAGCATA	A	2.5	19735	19627	17225	7000	Inf	3.37241	0.142857	22.8581	A27_TAS_45C_MT_A_5_.fastq
PRJNA513137	A4S-45-6	SAMN10696924	A4	A27	TAS	MT	45C	A	6	FLD0126	ACTGCGTGTC	A	2.5	19061	18950	16618	7000	Inf	3.36506	0.0571429	24.3582	A27_TAS_45C_MT_A_6_.fastq
PRJNA513137	A4S-45-7	SAMN10696925	A4	A27	TAS	MT	45C	A	7	FLD0127	CGATCGACTG	A	2.5	17785	17693	15600	7000	Inf	3.34684	0.0285714	25.5395	A27_TAS_45C_MT_A_7_.fastq
PRJNA513137	A4S-45-8	SAMN10696926	A4	A27	TAS	MT	45C	A	8	FLD0128	GCGAGATGTA	A	2.5	16474	16393	14035	7000	Inf	3.36641	NA	24.7261	A27_TAS_45C_MT_A_8_.fastq
PRJNA513137	A4S-55-1	SAMN10696927	A4	A27	TAS	MT	55C	A	1	FLD0161	TATAGAGATC	A	2.5	19649	19582	17304	7000	Inf	3.36961	0.0857143	25.4297	A27_TAS_55C_MT_A_1_.fastq
PRJNA513137	A4S-55-2	SAMN10696928	A4	A27	TAS	MT	55C	A	2	FLD0162	TCGATATCTA	A	2.5	18843	18765	16413	7000	Inf	3.3643	NA	24.0251	A27_TAS_55C_MT_A_2_.fastq
PRJNA513137	A4S-55-3	SAMN10696929	A4	A27	TAS	MT	55C	A	3	FLD0163	TACATGATAG	A	2.5	20400	20305	17918	7000	Inf	3.36923	0.114286	23.1388	A27_TAS_55C_MT_A_3_.fastq
PRJNA513137	A4S-55-4	SAMN10696930	A4	A27	TAS	MT	55C	A	4	FLD0164	TGAGATCATA	A	2.5	19875	19804	17546	7000	Inf	3.36746	0.0857143	25.8972	A27_TAS_55C_MT_A_4_.fastq
PRJNA513137	A4S-55-5	SAMN10696931	A4	A27	TAS	MT	55C	A	5	FLD0165	CTACATACTA	A	2.5	17854	17766	15737	7000	Inf	3.37036	0.0571429	22.626	A27_TAS_55C_MT_A_5_.fastq
PRJNA513137	A4S-55-6	SAMN10696932	A4	A27	TAS	MT	55C	A	6	FLD0166	ATCAGTGTAT	A	2.5	20560	20455	18125	7000	Inf	3.36581	0.228571	24.4998	A27_TAS_55C_MT_A_6_.fastq
PRJNA513137	A4S-55-7	SAMN10696933	A4	A27	TAS	MT	55C	A	7	FLD0167	ATCATATCTC	A	2.5	19577	19480	17216	7000	Inf	3.36713	0.114286	25.6681	A27_TAS_55C_MT_A_7_.fastq
PRJNA513137	A4S-55-8	SAMN10696934	A4	A27	TAS	MT	55C	A	8	FLD0168	AGTAGATCAT	A	2.5	21133	21029	18644	7000	Inf	3.35527	0.171429	24.595	A27_TAS_55C_MT_A_8_.fastq
PRJNA513137	A6-45-1	SAMN10696679	A6	A64	DePCR	MT	45C	A	1	FLD0033	TGTGCTCGCA	A	2.5	15364	15191	11918	7000	6.40835	3.44733	0.571429	98.4742	A64_DePCR_45C_MT_A_1_.fastq
PRJNA513137	A6-45-2	SAMN10696680	A6	A64	DePCR	MT	45C	A	2	FLD0034	GATGCGAGCT	A	2.5	19278	19066	15127	7000	5.61533	3.38778	0.371429	104.116	A64_DePCR_45C_MT_A_2_.fastq
PRJNA513137	A6-45-3	SAMN10696681	A6	A64	DePCR	MT	45C	A	3	FLD0035	CTGTACGTGA	A	2.5	11167	11040	8455	7000	6.30588	3.45542	1.91429	97.7377	A64_DePCR_45C_MT_A_3_.fastq
PRJNA513137	A6-45-4	SAMN10696682	A6	A64	DePCR	MT	45C	A	4	FLD0036	GCGATGATGA	A	2.5	23662	23405	18613	7000	5.69651	3.37208	0.0857143	105.474	A64_DePCR_45C_MT_A_4_.fastq
PRJNA513137	A6-45-5	SAMN10696683	A6	A64	DePCR	MT	45C	A	5	FLD0037	TGTCGAGTCA	A	2.5	16504	16337	12962	7000	6.34557	3.43946	0.171429	98.7588	A64_DePCR_45C_MT_A_5_.fastq
PRJNA513137	A6-45-6	SAMN10696684	A6	A64	DePCR	MT	45C	A	6	FLD0038	GTCTACTGTC	A	2.5	22237	22017	17905	7000	5.86515	3.40154	0.428571	103.813	A64_DePCR_45C_MT_A_6_.fastq
PRJNA513137	A6-45-7	SAMN10696685	A6	A64	DePCR	MT	45C	A	7	FLD0039	CAGTCAGAGT	A	2.5	16452	16283	13033	7000	6.92719	3.49003	0.257143	96.6418	A64_DePCR_45C_MT_A_7_.fastq
PRJNA513137	A6-45-8	SAMN10696686	A6	A64	DePCR	MT	45C	A	8	FLD0040	CGCAGTCTAT	A	2.5	21797	21586	17187	7000	6.6758	3.43699	0.0857143	99.1188	A64_DePCR_45C_MT_A_8_.fastq
PRJNA513137	A6-55-1	SAMN10696687	A6	A64	DePCR	MT	55C	A	1	FLD0225	TGGTGCTGGA	A	2.5	26257	25975	20454	7000	3.67586	2.74946	0.2	145.845	A64_DePCR_55C_MT_A_1_.fastq
PRJNA513137	A6-55-2	SAMN10696688	A6	A64	DePCR	MT	55C	A	2	FLD0226	TATGGTAAGG	A	2.5	31581	31251	25102	7000	3.62076	2.73584	0.142857	146.485	A64_DePCR_55C_MT_A_2_.fastq
PRJNA513137	A6-55-3	SAMN10696689	A6	A64	DePCR	MT	55C	A	3	FLD0227	GTTCGATTGT	A	2.5	38524	38134	31113	7000	3.73912	2.78809	0.228571	144.983	A64_DePCR_55C_MT_A_3_.fastq
PRJNA513137	A6-55-4	SAMN10696690	A6	A64	DePCR	MT	55C	A	4	FLD0228	GGTAGAATGA	A	2.5	35956	35599	28708	7000	3.76153	2.81336	0.171429	144.068	A64_DePCR_55C_MT_A_4_.fastq
PRJNA513137	A6-55-5	SAMN10696691	A6	A64	DePCR	MT	55C	A	5	FLD0229	TTCTCATCGT	A	2.5	28500	28238	22994	7000	3.67392	2.74617	0.142857	146.266	A64_DePCR_55C_MT_A_5_.fastq
PRJNA513137	A6-55-6	SAMN10696692	A6	A64	DePCR	MT	55C	A	6	FLD0230	CTCAATCGTA	A	2.5	28160	27915	22717	7000	3.58119	2.75748	0.114286	147.099	A64_DePCR_55C_MT_A_6_.fastq
PRJNA513137	A6-55-7	SAMN10696693	A6	A64	DePCR	MT	55C	A	7	FLD0231	CGCTAATGTA	A	2.5	31353	31075	25164	7000	3.65859	2.71375	0.542857	146.816	A64_DePCR_55C_MT_A_7_.fastq
PRJNA513137	A6-55-8	SAMN10696694	A6	A64	DePCR	MT	55C	A	8	FLD0232	GCGTCTGAAT	A	2.5	40228	39842	32369	7000	3.72007	2.7661	0.257143	145.343	A64_DePCR_55C_MT_A_8_.fastq
PRJNA513137	A6S-45-1	SAMN10696935	A6	A64	TAS	MT	45C	A	1	FLD0129	CTGATGCAGA	A	2.5	19692	19594	17085	7000	21.8768	4.04009	0.0285714	43.426	A64_TAS_45C_MT_A_1_.fastq
PRJNA513137	A6S-45-2	SAMN10696936	A6	A64	TAS	MT	45C	A	2	FLD0130	GTGACGTACG	A	2.5	18240	18152	15737	7000	22.5691	4.03594	0.0285714	42.561	A64_TAS_45C_MT_A_2_.fastq
PRJNA513137	A6S-45-3	SAMN10696937	A6	A64	TAS	MT	45C	A	3	FLD0131	CGACGCTGAT	A	2.5	20266	20166	17728	7000	22.7434	4.04704	0.0285714	42.896	A64_TAS_45C_MT_A_3_.fastq
PRJNA513137	A6S-45-4	SAMN10696938	A6	A64	TAS	MT	45C	A	4	FLD0132	CTACGATCAG	A	2.5	19419	19320	16974	7000	24.3172	4.04149	0.0571429	43.2225	A64_TAS_45C_MT_A_4_.fastq
PRJNA513137	A6S-45-5	SAMN10696939	A6	A64	TAS	MT	45C	A	5	FLD0133	GCACTAGACA	A	2.5	22448	22333	19724	7000	21.9048	4.03056	0.0285714	43.5161	A64_TAS_45C_MT_A_5_.fastq
PRJNA513137	A6S-45-6	SAMN10696940	A6	A64	TAS	MT	45C	A	6	FLD0134	CTAGCAGATG	A	2.5	20583	20490	17924	7000	26.6691	4.04257	0.0285714	42.3784	A64_TAS_45C_MT_A_6_.fastq
PRJNA513137	A6S-45-7	SAMN10696941	A6	A64	TAS	MT	45C	A	7	FLD0135	CATGATACGC	A	2.5	18434	18346	15717	7000	22.237	4.03209	0.0571429	43.94	A64_TAS_45C_MT_A_7_.fastq
PRJNA513137	A6S-45-8	SAMN10696942	A6	A64	TAS	MT	45C	A	8	FLD0136	GCAGCTGTCA	A	2.5	18760	18664	16357	7000	22.6755	4.03536	0.0285714	42.6719	A64_TAS_45C_MT_A_8_.fastq
PRJNA513137	A6S-55-1	SAMN10696943	A6	A64	TAS	MT	55C	A	1	FLD0169	ACATAGTATC	A	2.5	22380	22259	19747	7000	19.8796	4.01425	0.285714	45.1952	A64_TAS_55C_MT_A_1_.fastq
PRJNA513137	A6S-55-2	SAMN10696944	A6	A64	TAS	MT	55C	A	2	FLD0170	ATGTATAGTC	A	2.5	21187	21084	18751	7000	19.2124	4.02471	0.0857143	43.942	A64_TAS_55C_MT_A_2_.fastq
PRJNA513137	A6S-55-3	SAMN10696945	A6	A64	TAS	MT	55C	A	3	FLD0171	ACAGTCATAT	A	2.5	21662	21546	19066	7000	19.6591	4.02227	NA	45.1575	A64_TAS_55C_MT_A_3_.fastq
PRJNA513137	A6S-55-4	SAMN10696946	A6	A64	TAS	MT	55C	A	4	FLD0172	ACATATACGT	A	2.5	20973	20838	18406	7000	20.0957	4.02932	NA	44.7547	A64_TAS_55C_MT_A_4_.fastq
PRJNA513137	A6S-55-5	SAMN10696947	A6	A64	TAS	MT	55C	A	5	FLD0173	AGCATCTATA	A	2.5	20555	20458	18057	7000	17.9331	4.01541	0.0857143	45.1608	A64_TAS_55C_MT_A_5_.fastq
PRJNA513137	A6S-55-6	SAMN10696948	A6	A64	TAS	MT	55C	A	6	FLD0174	AGACTATATC	A	2.5	20963	20862	18480	7000	20.1835	4.0191	0.0571429	44.5784	A64_TAS_55C_MT_A_6_.fastq
PRJNA513137	A6S-55-7	SAMN10696949	A6	A64	TAS	MT	55C	A	7	FLD0175	CAGCATCTAG	A	2.5	17446	17357	15319	7000	19.6885	4.02269	0.0571429	44.8792	A64_TAS_55C_MT_A_7_.fastq
PRJNA513137	A6S-55-8	SAMN10696950	A6	A64	TAS	MT	55C	A	8	FLD0176	CGAGACGACA	A	2.5	16179	16090	14031	7000	18.974	4.02558	NA	46.0311	A64_TAS_55C_MT_A_8_.fastq
PRJNA513137	B1-45-1	SAMN10696695	B1	B01	DePCR	MT	45C	B	1	FLD0041	GTATGAGCAC	B	2.5	40846	40394	32793	7000	6.02748	0.27173	22.2571	NA	B01_DePCR_45C_MT_B_1_.fastq
PRJNA513137	B1-45-2	SAMN10696696	B1	B01	DePCR	MT	45C	B	2	FLD0042	CGAGTGCTGT	B	2.5	24913	24621	19776	7000	6.21089	0.265982	22.8857	NA	B01_DePCR_45C_MT_B_2_.fastq
PRJNA513137	B1-45-3	SAMN10696697	B1	B01	DePCR	MT	45C	B	3	FLD0043	TATAGCACGC	B	2.5	20629	20386	15893	7000	6.08271	0.27872	20.4571	NA	B01_DePCR_45C_MT_B_3_.fastq
PRJNA513137	B1-45-4	SAMN10696698	B1	B01	DePCR	MT	45C	B	4	FLD0044	TCATGCGCGA	B	2.5	22712	22467	17661	7000	6.20807	0.23506	22	NA	B01_DePCR_45C_MT_B_4_.fastq
PRJNA513137	B1-45-5	SAMN10696699	B1	B01	DePCR	MT	45C	B	5	FLD0045	TATGCGCTGC	B	2.5	18330	18131	13627	7000	5.57117	0.286635	23.6286	NA	B01_DePCR_45C_MT_B_5_.fastq
PRJNA513137	B1-45-6	SAMN10696700	B1	B01	DePCR	MT	45C	B	6	FLD0046	TCTCTGTGCA	B	2.5	28169	27863	22536	7000	6.50813	0.278966	21	NA	B01_DePCR_45C_MT_B_6_.fastq
PRJNA513137	B1-45-7	SAMN10696701	B1	B01	DePCR	MT	45C	B	7	FLD0047	CTATCGCGTG	B	2.5	18120	17903	14400	7000	6.21248	0.280698	23.7143	NA	B01_DePCR_45C_MT_B_7_.fastq
PRJNA513137	B1-45-8	SAMN10696702	B1	B01	DePCR	MT	45C	B	8	FLD0048	TACGCTGCTG	B	2.5	27804	27506	22124	7000	6.16143	0.255788	23.4286	NA	B01_DePCR_45C_MT_B_8_.fastq
PRJNA513137	B1-55-1	SAMN10696703	B1	B01	DePCR	MT	55C	B	1	FLD0233	TTCTGTTGCC	B	2.5	29914	29586	24123	7000	5.64304	0.379535	22.9714	NA	B01_DePCR_55C_MT_B_1_.fastq
PRJNA513137	B1-55-2	SAMN10696704	B1	B01	DePCR	MT	55C	B	2	FLD0234	TTGTCCTTGC	B	2.5	31551	31203	25098	7000	5.39891	0.390619	23.1714	NA	B01_DePCR_55C_MT_B_2_.fastq
PRJNA513137	B1-55-3	SAMN10696705	B1	B01	DePCR	MT	55C	B	3	FLD0235	CCTGTGTAGA	B	2.5	31728	31402	25736	7000	5.83099	0.347802	22.3143	NA	B01_DePCR_55C_MT_B_3_.fastq
PRJNA513137	B1-55-4	SAMN10696706	B1	B01	DePCR	MT	55C	B	4	FLD0236	GATAAGAAGG	B	2.5	44053	43556	35776	7000	5.51701	0.336154	22.6571	NA	B01_DePCR_55C_MT_B_4_.fastq
PRJNA513137	B1-55-5	SAMN10696707	B1	B01	DePCR	MT	55C	B	5	FLD0237	CAGGTCACAT	B	2.5	25388	25110	20526	7000	5.57544	0.372065	24.0286	NA	B01_DePCR_55C_MT_B_5_.fastq
PRJNA513137	B1-55-6	SAMN10696708	B1	B01	DePCR	MT	55C	B	6	FLD0238	GCCATGTCAT	B	2.5	49358	48807	40055	7000	5.48754	0.329298	23.0571	NA	B01_DePCR_55C_MT_B_6_.fastq
PRJNA513137	B1-55-7	SAMN10696709	B1	B01	DePCR	MT	55C	B	7	FLD0239	TCTGCCTATA	B	2.5	42913	42467	34819	7000	5.56348	0.382275	23.8857	NA	B01_DePCR_55C_MT_B_7_.fastq
PRJNA513137	B1-55-8	SAMN10696710	B1	B01	DePCR	MT	55C	B	8	FLD0240	CTTAGTTCGC	B	2.5	30678	30345	24199	7000	5.56595	0.37011	23.7143	NA	B01_DePCR_55C_MT_B_8_.fastq
PRJNA513137	B1S-45-1	SAMN10696951	B1	B01	TAS	MT	45C	B	1	FLD0193	TTGTTGCTGT	B	2.5	31891	31751	28514	7000	7.40248	0.0587268	45	NA	B01_TAS_45C_MT_B_1_.fastq
PRJNA513137	B1S-45-2	SAMN10696952	B1	B01	TAS	MT	45C	B	2	FLD0194	GTGTGGTTGT	B	2.5	27795	27644	24885	7000	6.70875	0.0526268	46.7143	NA	B01_TAS_45C_MT_B_2_.fastq
PRJNA513137	B1S-45-3	SAMN10696953	B1	B01	TAS	MT	45C	B	3	FLD0195	TAGGTGGAAT	B	2.5	30980	30836	27749	7000	6.62568	0.0544558	44.6286	NA	B01_TAS_45C_MT_B_3_.fastq
PRJNA513137	B1S-45-4	SAMN10696954	B1	B01	TAS	MT	45C	B	4	FLD0196	TGTAGGTGGA	B	2.5	28957	28836	25875	7000	6.97413	0.0681645	44.7429	NA	B01_TAS_45C_MT_B_4_.fastq
PRJNA513137	B1S-45-5	SAMN10696955	B1	B01	TAS	MT	45C	B	5	FLD0197	TTAGTGGTGA	B	2.5	27494	27373	24519	7000	6.61778	0.0700153	45.4	NA	B01_TAS_45C_MT_B_5_.fastq
PRJNA513137	B1S-45-6	SAMN10696956	B1	B01	TAS	MT	45C	B	6	FLD0198	GTGAAGGTAA	B	2.5	27184	27070	24282	7000	6.84563	0.0752634	46.8286	NA	B01_TAS_45C_MT_B_6_.fastq
PRJNA513137	B1S-45-7	SAMN10696957	B1	B01	TAS	MT	45C	B	7	FLD0199	TGTTGTGGTA	B	2.5	27739	27607	24836	7000	6.90232	0.0547247	46.0857	NA	B01_TAS_45C_MT_B_7_.fastq
PRJNA513137	B1S-45-8	SAMN10696958	B1	B01	TAS	MT	45C	B	8	FLD0200	GTTGATGAGT	B	2.5	32569	32431	29359	7000	7.20384	0.0594445	45.6	NA	B01_TAS_45C_MT_B_8_.fastq
PRJNA513137	B1S-55-1	SAMN10696959	B1	B01	TAS	MT	55C	B	1	FLD0289	CACTGCTTGA	B	2.5	28100	27979	25225	7000	6.12526	0.063077	54.5714	NA	B01_TAS_55C_MT_B_1_.fastq
PRJNA513137	B1S-55-2	SAMN10696960	B1	B01	TAS	MT	55C	B	2	FLD0290	TCTAGCGTGG	B	2.5	30343	30201	26900	7000	5.78249	0.0518908	55.3143	NA	B01_TAS_55C_MT_B_2_.fastq
PRJNA513137	B1S-55-3	SAMN10696961	B1	B01	TAS	MT	55C	B	3	FLD0291	GCATAATCGC	B	2.5	30101	29968	26800	7000	5.89139	0.0632296	56	NA	B01_TAS_55C_MT_B_3_.fastq
PRJNA513137	B1S-55-4	SAMN10696962	B1	B01	TAS	MT	55C	B	4	FLD0292	GTCGTAACAC	B	2.5	35040	34905	31510	7000	5.94582	0.0674694	56.4	NA	B01_TAS_55C_MT_B_4_.fastq
PRJNA513137	B1S-55-5	SAMN10696963	B1	B01	TAS	MT	55C	B	5	FLD0293	GAGATTGCTA	B	2.5	31919	31784	28519	7000	6.02945	0.0562487	57.2857	NA	B01_TAS_55C_MT_B_5_.fastq
PRJNA513137	B1S-55-6	SAMN10696964	B1	B01	TAS	MT	55C	B	6	FLD0294	GGACAGATGG	B	2.5	30967	30852	27817	7000	5.95724	0.0532557	55.2	NA	B01_TAS_55C_MT_B_6_.fastq
PRJNA513137	B1S-55-7	SAMN10696965	B1	B01	TAS	MT	55C	B	7	FLD0295	CTTACGTTGC	B	2.5	27753	27637	24684	7000	5.77069	0.0754293	57.8	NA	B01_TAS_55C_MT_B_7_.fastq
PRJNA513137	B1S-55-8	SAMN10696966	B1	B01	TAS	MT	55C	B	8	FLD0296	GTGTTCGGTC	B	2.5	27031	26914	24068	7000	6.1641	0.0599537	55.1714	NA	B01_TAS_55C_MT_B_8_.fastq
PRJNA513137	B3-45-1	SAMN10696727	B3	B09	DePCR	MT	45C	B	1	FLD0049	CTGCATGATC	B	2.5	14618	14462	11611	7000	2.43514	2.33065	16	38.0405	B09_DePCR_45C_MT_B_1_.fastq
PRJNA513137	B3-45-2	SAMN10696728	B3	B09	DePCR	MT	45C	B	2	FLD0050	CGCGTATCAT	B	2.5	18443	18247	14675	7000	1.9422	2.33657	17.7143	36.748	B09_DePCR_45C_MT_B_2_.fastq
PRJNA513137	B3-45-3	SAMN10696729	B3	B09	DePCR	MT	45C	B	3	FLD0051	GTATCTCTCG	B	2.5	18010	17789	14428	7000	1.88875	2.31734	18.7714	34.8517	B09_DePCR_45C_MT_B_3_.fastq
PRJNA513137	B3-45-4	SAMN10696730	B3	B09	DePCR	MT	45C	B	4	FLD0052	GCTCATATGC	B	2.5	26451	26108	20756	7000	1.97746	2.33857	18.3714	35.7225	B09_DePCR_45C_MT_B_4_.fastq
PRJNA513137	B3-45-5	SAMN10696731	B3	B09	DePCR	MT	45C	B	5	FLD0053	CACTATGTCG	B	2.5	21476	21258	17103	7000	2.27487	2.34948	17.8571	39.0055	B09_DePCR_45C_MT_B_5_.fastq
PRJNA513137	B3-45-6	SAMN10696732	B3	B09	DePCR	MT	45C	B	6	FLD0054	TAGCGCGTAG	B	2.5	14709	14535	11547	7000	2.32847	2.32425	19.4	36.3251	B09_DePCR_45C_MT_B_6_.fastq
PRJNA513137	B3-45-7	SAMN10696733	B3	B09	DePCR	MT	45C	B	7	FLD0055	CGTCACAGTA	B	2.5	18340	18122	14748	7000	2.48172	2.34552	19.2286	39.3024	B09_DePCR_45C_MT_B_7_.fastq
PRJNA513137	B3-45-8	SAMN10696734	B3	B09	DePCR	MT	45C	B	8	FLD0056	TCGCGTGAGA	B	2.5	21240	21008	16693	7000	2.02435	2.33152	16.6286	35.0275	B09_DePCR_45C_MT_B_8_.fastq
PRJNA513137	B3-55-1	SAMN10696735	B3	B09	DePCR	MT	55C	B	1	FLD0241	CGTAATGAGC	B	2.5	36455	36091	28446	7000	0.826762	2.31048	16	43.5628	B09_DePCR_55C_MT_B_1_.fastq
PRJNA513137	B3-55-2	SAMN10696736	B3	B09	DePCR	MT	55C	B	2	FLD0242	TTGCTTAGTC	B	2.5	37685	37337	30418	7000	0.868283	2.30562	15.9429	41.2874	B09_DePCR_55C_MT_B_2_.fastq
PRJNA513137	B3-55-3	SAMN10696737	B3	B09	DePCR	MT	55C	B	3	FLD0243	TCTTGTTCAC	B	2.5	35905	35581	28833	7000	0.822886	2.3207	12.7714	41.982	B09_DePCR_55C_MT_B_3_.fastq
PRJNA513137	B3-55-4	SAMN10696738	B3	B09	DePCR	MT	55C	B	4	FLD0244	GTGGCTTCGT	B	2.5	45125	44601	35516	7000	0.814636	2.31158	16.6571	42.0047	B09_DePCR_55C_MT_B_4_.fastq
PRJNA513137	B3-55-5	SAMN10696739	B3	B09	DePCR	MT	55C	B	5	FLD0245	TGTTCGATAG	B	2.5	39219	38857	31107	7000	0.833399	2.29308	13.9143	41.4497	B09_DePCR_55C_MT_B_5_.fastq
PRJNA513137	B3-55-6	SAMN10696740	B3	B09	DePCR	MT	55C	B	6	FLD0246	TCATTCAGTG	B	2.5	38241	37871	30768	7000	0.813551	2.30559	14.0571	41.9255	B09_DePCR_55C_MT_B_6_.fastq
PRJNA513137	B3-55-7	SAMN10696741	B3	B09	DePCR	MT	55C	B	7	FLD0247	GTGGAGAGCT	B	2.5	45082	44649	36160	7000	0.795557	2.29247	14.9714	42.706	B09_DePCR_55C_MT_B_7_.fastq
PRJNA513137	B3-55-8	SAMN10696742	B3	B09	DePCR	MT	55C	B	8	FLD0248	GTAGAAGTGG	B	2.5	48743	48270	38741	7000	0.767869	2.30311	16.4571	41.6753	B09_DePCR_55C_MT_B_8_.fastq
PRJNA513137	B3S-45-1	SAMN10696983	B3	B09	TAS	MT	45C	B	1	FLD0201	GGTCAGTGTA	B	2.5	29476	29330	26283	7000	6.07634	2.33354	45.8286	20.6334	B09_TAS_45C_MT_B_1_.fastq
PRJNA513137	B3S-45-2	SAMN10696984	B3	B09	TAS	MT	45C	B	2	FLD0202	GTAATGGAGT	B	2.5	26804	26643	23933	7000	6.46539	2.3336	44.3714	19.7539	B09_TAS_45C_MT_B_2_.fastq
PRJNA513137	B3S-45-3	SAMN10696985	B3	B09	TAS	MT	45C	B	3	FLD0203	CTCGTTATTC	B	2.5	25757	25632	22960	7000	6.43597	2.34306	44.9429	20.3935	B09_TAS_45C_MT_B_3_.fastq
PRJNA513137	B3S-45-4	SAMN10696986	B3	B09	TAS	MT	45C	B	4	FLD0204	GGAAGTAAGG	B	2.5	27800	27654	24753	7000	6.29532	2.34298	45.5429	19.7172	B09_TAS_45C_MT_B_4_.fastq
PRJNA513137	B3S-45-5	SAMN10696987	B3	B09	TAS	MT	45C	B	5	FLD0205	CGGTGTGTGT	B	2.5	27912	27762	24656	7000	6.16448	2.31842	45.8857	20.4668	B09_TAS_45C_MT_B_5_.fastq
PRJNA513137	B3S-45-6	SAMN10696988	B3	B09	TAS	MT	45C	B	6	FLD0206	CGTCTTCTTA	B	2.5	27102	26996	24272	7000	6.07359	2.33112	47.2571	20.419	B09_TAS_45C_MT_B_6_.fastq
PRJNA513137	B3S-45-7	SAMN10696989	B3	B09	TAS	MT	45C	B	7	FLD0207	TGTGAATCTC	B	2.5	26913	26804	24166	7000	6.07227	2.32943	45.3714	21.3711	B09_TAS_45C_MT_B_7_.fastq
PRJNA513137	B3S-45-8	SAMN10696990	B3	B09	TAS	MT	45C	B	8	FLD0208	CTAATCGTGT	B	2.5	28337	28220	25136	7000	6.3541	2.33337	44.6	20.9823	B09_TAS_45C_MT_B_8_.fastq
PRJNA513137	B3S-55-1	SAMN10696991	B3	B09	TAS	MT	55C	B	1	FLD0297	CTCAAGAAGC	B	2.5	23860	23739	21067	7000	5.29403	2.35079	28.4571	20.1995	B09_TAS_55C_MT_B_1_.fastq
PRJNA513137	B3S-55-2	SAMN10696992	B3	B09	TAS	MT	55C	B	2	FLD0298	TCTCGGATAG	B	2.5	24257	24129	21549	7000	5.32406	2.34816	31.4571	20.2132	B09_TAS_55C_MT_B_2_.fastq
PRJNA513137	B3S-55-3	SAMN10696993	B3	B09	TAS	MT	55C	B	3	FLD0299	CTCTGGACGA	B	2.5	25987	25878	23044	7000	5.22716	2.36122	32.8286	19.7388	B09_TAS_55C_MT_B_3_.fastq
PRJNA513137	B3S-55-4	SAMN10696994	B3	B09	TAS	MT	55C	B	4	FLD0300	CGAGCATTGT	B	2.5	29077	28959	25847	7000	5.25071	2.34262	30.6571	20.6323	B09_TAS_55C_MT_B_4_.fastq
PRJNA513137	B3S-55-5	SAMN10696995	B3	B09	TAS	MT	55C	B	5	FLD0301	CCAAGAAGAA	B	2.5	28880	28710	25561	7000	5.35722	2.3325	34.3429	18.8714	B09_TAS_55C_MT_B_5_.fastq
PRJNA513137	B3S-55-6	SAMN10696996	B3	B09	TAS	MT	55C	B	6	FLD0302	TCCTTGTTCT	B	2.5	26160	26056	23530	7000	5.14324	2.34912	32.1429	18.4945	B09_TAS_55C_MT_B_6_.fastq
PRJNA513137	B3S-55-7	SAMN10696997	B3	B09	TAS	MT	55C	B	7	FLD0303	GTAACGATGT	B	2.5	27869	27754	24377	7000	5.07249	2.33285	31.4	19.2221	B09_TAS_55C_MT_B_7_.fastq
PRJNA513137	B3S-55-8	SAMN10696998	B3	B09	TAS	MT	55C	B	8	FLD0304	TGGACTCAGA	B	2.5	22989	22914	20435	7000	5.0258	2.33329	32.5714	19.8197	B09_TAS_55C_MT_B_8_.fastq
PRJNA513137	B2-45-1	SAMN10696711	B2	B10	DePCR	MT	45C	B	1	FLD0057	TACATCGCTG	B	2.5	15185	15058	12093	7000	2.4865	2.27192	18.2286	33.8433	B10_DePCR_45C_MT_B_1_.fastq
PRJNA513137	B2-45-2	SAMN10696712	B2	B10	DePCR	MT	45C	B	2	FLD0058	GTGAGAGACA	B	2.5	26630	26377	21461	7000	2.18622	2.24075	20.7429	34.716	B10_DePCR_45C_MT_B_2_.fastq
PRJNA513137	B2-45-3	SAMN10696713	B2	B10	DePCR	MT	45C	B	3	FLD0059	GACTGTACGT	B	2.5	17776	17587	14028	7000	1.91455	2.26727	19.1429	35.1985	B10_DePCR_45C_MT_B_3_.fastq
PRJNA513137	B2-45-4	SAMN10696714	B2	B10	DePCR	MT	45C	B	4	FLD0060	GCACGTAGCT	B	2.5	19283	19057	15016	7000	1.88747	2.25286	19.4	31.5316	B10_DePCR_45C_MT_B_4_.fastq
PRJNA513137	B2-45-5	SAMN10696715	B2	B10	DePCR	MT	45C	B	5	FLD0061	TCACGCTATG	B	2.5	18120	17949	14515	7000	2.35923	2.23906	19.9714	33.8523	B10_DePCR_45C_MT_B_5_.fastq
PRJNA513137	B2-45-6	SAMN10696716	B2	B10	DePCR	MT	45C	B	6	FLD0062	CGTACTACGT	B	2.5	11212	11106	8879	7000	2.29894	NA	NA	34.4645	B10_DePCR_45C_MT_B_6_.fastq
PRJNA513137	B2-45-7	SAMN10696717	B2	B10	DePCR	MT	45C	B	7	FLD0063	CAGCTGAGTA	B	2.5	25407	25164	20346	7000	2.31405	2.26483	20.8	34.1024	B10_DePCR_45C_MT_B_7_.fastq
PRJNA513137	B2-45-8	SAMN10696718	B2	B10	DePCR	MT	45C	B	8	FLD0064	GAGATCAGTC	B	2.5	28880	28619	23159	7000	2.14702	2.25094	16.8286	32.7154	B10_DePCR_45C_MT_B_8_.fastq
PRJNA513137	B2-55-1	SAMN10696719	B2	B10	DePCR	MT	55C	B	1	FLD0249	TGGAGCATGT	B	2.5	34582	34257	27632	7000	0.797723	2.21287	15.9143	37.2484	B10_DePCR_55C_MT_B_1_.fastq
PRJNA513137	B2-55-2	SAMN10696720	B2	B10	DePCR	MT	55C	B	2	FLD0250	GAAGGAGATA	B	2.5	46421	45968	37436	7000	0.867602	2.2223	11.3714	37.1365	B10_DePCR_55C_MT_B_2_.fastq
PRJNA513137	B2-55-3	SAMN10696721	B2	B10	DePCR	MT	55C	B	3	FLD0251	CGAATGTATG	B	2.5	38789	38428	31005	7000	0.8725	2.22934	14.0857	38.6985	B10_DePCR_55C_MT_B_3_.fastq
PRJNA513137	B2-55-4	SAMN10696722	B2	B10	DePCR	MT	55C	B	4	FLD0252	TCGTGAATGA	B	2.5	39371	38978	31579	7000	0.887	2.2334	12.8	37.2866	B10_DePCR_55C_MT_B_4_.fastq
PRJNA513137	B2-55-5	SAMN10696723	B2	B10	DePCR	MT	55C	B	5	FLD0253	GAATAGCTGA	B	2.5	51336	50874	41058	7000	0.868439	2.21692	15.3143	37.5337	B10_DePCR_55C_MT_B_5_.fastq
PRJNA513137	B2-55-6	SAMN10696724	B2	B10	DePCR	MT	55C	B	6	FLD0254	TTGTCACATC	B	2.5	33892	33588	27032	7000	0.859501	2.23683	14.6857	38.298	B10_DePCR_55C_MT_B_6_.fastq
PRJNA513137	B2-55-7	SAMN10696725	B2	B10	DePCR	MT	55C	B	7	FLD0255	CTGGAGGCTA	B	2.5	33464	33188	25826	7000	0.873117	2.22454	15.7429	36.7284	B10_DePCR_55C_MT_B_7_.fastq
PRJNA513137	B2-55-8	SAMN10696726	B2	B10	DePCR	MT	55C	B	8	FLD0256	TGTCAGCTTA	B	2.5	35977	35680	28959	7000	0.884681	2.23055	15.3714	37.0397	B10_DePCR_55C_MT_B_8_.fastq
PRJNA513137	B2S-45-1	SAMN10696967	B2	B10	TAS	MT	45C	B	1	FLD0209	CTCTTAGTTC	B	2.5	25897	25766	23054	7000	6.28288	2.27485	44.2286	19.6411	B10_TAS_45C_MT_B_1_.fastq
PRJNA513137	B2S-45-2	SAMN10696968	B2	B10	TAS	MT	45C	B	2	FLD0210	GGATAGGATC	B	2.5	25898	25746	22957	7000	6.68168	2.27094	45.4	20.7063	B10_TAS_45C_MT_B_2_.fastq
PRJNA513137	B2S-45-3	SAMN10696969	B2	B10	TAS	MT	45C	B	3	FLD0211	GGTGTCTTGT	B	2.5	26495	26361	23510	7000	6.40617	2.28832	46.8857	19.7527	B10_TAS_45C_MT_B_3_.fastq
PRJNA513137	B2S-45-4	SAMN10696970	B2	B10	TAS	MT	45C	B	4	FLD0212	GATGGTTGTA	B	2.5	24558	24466	21916	7000	6.39188	2.30236	44.0571	19.0236	B10_TAS_45C_MT_B_4_.fastq
PRJNA513137	B2S-45-5	SAMN10696971	B2	B10	TAS	MT	45C	B	5	FLD0213	CCTCGTTGTT	B	2.5	25462	25333	22774	7000	6.27763	2.28064	44.2286	20.8302	B10_TAS_45C_MT_B_5_.fastq
PRJNA513137	B2S-45-6	SAMN10696972	B2	B10	TAS	MT	45C	B	6	FLD0214	GGTTGGAGTT	B	2.5	30916	30748	27392	7000	6.07341	2.274	45.2286	20.3455	B10_TAS_45C_MT_B_6_.fastq
PRJNA513137	B2S-45-7	SAMN10696973	B2	B10	TAS	MT	45C	B	7	FLD0215	TGGTGTCCGT	B	2.5	23603	23507	20818	7000	6.07009	2.27121	46.8571	19.6603	B10_TAS_45C_MT_B_7_.fastq
PRJNA513137	B2S-45-8	SAMN10696974	B2	B10	TAS	MT	45C	B	8	FLD0216	CGTTAGCGTA	B	2.5	25558	25444	22713	7000	6.05388	2.27487	45.0286	19.89	B10_TAS_45C_MT_B_8_.fastq
PRJNA513137	B2S-55-1	SAMN10696975	B2	B10	TAS	MT	55C	B	1	FLD0305	GGCATCATGC	B	2.5	22733	22623	19783	7000	4.90945	2.27117	31.8857	16.946	B10_TAS_55C_MT_B_1_.fastq
PRJNA513137	B2S-55-2	SAMN10696976	B2	B10	TAS	MT	55C	B	2	FLD0306	GTATAACGCT	B	2.5	25509	25401	22881	7000	5.18129	2.28995	31.5143	17.1555	B10_TAS_55C_MT_B_2_.fastq
PRJNA513137	B2S-55-3	SAMN10696977	B2	B10	TAS	MT	55C	B	3	FLD0307	GCAGATAAGT	B	2.5	27262	27129	24222	7000	5.13745	2.28958	30.4857	16.9371	B10_TAS_55C_MT_B_3_.fastq
PRJNA513137	B2S-55-4	SAMN10696978	B2	B10	TAS	MT	55C	B	4	FLD0308	GTCGGCTCTA	B	2.5	23791	23520	20975	7000	5.05735	2.2714	32.0286	17.4201	B10_TAS_55C_MT_B_4_.fastq
PRJNA513137	B2S-55-5	SAMN10696979	B2	B10	TAS	MT	55C	B	5	FLD0309	TTCGATAGCA	B	2.5	21434	21328	18975	7000	5.01223	2.27813	32.8	16.9378	B10_TAS_55C_MT_B_5_.fastq
PRJNA513137	B2S-55-6	SAMN10696980	B2	B10	TAS	MT	55C	B	6	FLD0310	GTCTAGCAGG	B	2.5	24593	24465	21648	7000	4.96895	2.28796	30.9714	17.6556	B10_TAS_55C_MT_B_6_.fastq
PRJNA513137	B2S-55-7	SAMN10696981	B2	B10	TAS	MT	55C	B	7	FLD0311	GGAACACAGG	B	2.5	21223	21120	18778	7000	4.98356	2.28219	32.2	17.6926	B10_TAS_55C_MT_B_7_.fastq
PRJNA513137	B2S-55-8	SAMN10696982	B2	B10	TAS	MT	55C	B	8	FLD0312	TGGTTCGCTG	B	2.5	29956	29832	26542	7000	4.95601	2.30533	30.2857	18.3572	B10_TAS_55C_MT_B_8_.fastq
PRJNA513137	B4-45-1	SAMN10696743	B4	B27	DePCR	MT	45C	B	1	FLD0065	TACTGAGCTG	B	2.5	16472	16320	12861	7000	Inf	3.24808	11.5429	40.7382	B27_DePCR_45C_MT_B_1_.fastq
PRJNA513137	B4-45-2	SAMN10696744	B4	B27	DePCR	MT	45C	B	2	FLD0066	TAGTAGCGCG	B	2.5	12691	12539	9489	7000	Inf	3.26365	11.8	41.4113	B27_DePCR_45C_MT_B_2_.fastq
PRJNA513137	B4-45-3	SAMN10696745	B4	B27	DePCR	MT	45C	B	3	FLD0067	GACGTCTGCT	B	2.5	15066	14914	11837	7000	Inf	3.28476	11.3714	41.9243	B27_DePCR_45C_MT_B_3_.fastq
PRJNA513137	B4-45-4	SAMN10696746	B4	B27	DePCR	MT	45C	B	4	FLD0068	GTACTCGCGA	B	2.5	30578	30236	23263	7000	Inf	3.27219	13.5143	41.0753	B27_DePCR_45C_MT_B_4_.fastq
PRJNA513137	B4-45-5	SAMN10696747	B4	B27	DePCR	MT	45C	B	5	FLD0069	TCTGAGCGCA	B	2.5	19884	19682	15391	7000	Inf	3.26985	13.5714	40.6357	B27_DePCR_45C_MT_B_5_.fastq
PRJNA513137	B4-45-6	SAMN10696748	B4	B27	DePCR	MT	45C	B	6	FLD0070	TAGACGTGCT	B	2.5	11388	11279	8488	7000	Inf	NA	NA	41.3779	B27_DePCR_45C_MT_B_6_.fastq
PRJNA513137	B4-45-7	SAMN10696749	B4	B27	DePCR	MT	45C	B	7	FLD0071	GTGACTCGTC	B	2.5	33076	32763	26057	7000	Inf	3.25545	10.4857	40.41	B27_DePCR_45C_MT_B_7_.fastq
PRJNA513137	B4-45-8	SAMN10696750	B4	B27	DePCR	MT	45C	B	8	FLD0072	TCGAGTAGCG	B	2.5	13283	13118	9690	7000	Inf	3.2691	10.4857	42.4095	B27_DePCR_45C_MT_B_8_.fastq
PRJNA513137	B4-55-1	SAMN10696751	B4	B27	DePCR	MT	55C	B	1	FLD0257	GTTCTTCGTA	B	2.5	40422	40022	32058	7000	Inf	3.22905	10.0286	48.4986	B27_DePCR_55C_MT_B_1_.fastq
PRJNA513137	B4-55-2	SAMN10696752	B4	B27	DePCR	MT	55C	B	2	FLD0258	TTACACGTTC	B	2.5	35125	34787	27604	7000	Inf	3.22112	10.6571	48.426	B27_DePCR_55C_MT_B_2_.fastq
PRJNA513137	B4-55-3	SAMN10696753	B4	B27	DePCR	MT	55C	B	3	FLD0259	GTAGCCAGTA	B	2.5	32995	32631	25824	7000	Inf	3.23293	11.2571	46.9447	B27_DePCR_55C_MT_B_3_.fastq
PRJNA513137	B4-55-4	SAMN10696754	B4	B27	DePCR	MT	55C	B	4	FLD0260	TGAGAAGGTA	B	2.5	48915	48489	38788	7000	Inf	3.22283	10.3143	48.4282	B27_DePCR_55C_MT_B_4_.fastq
PRJNA513137	B4-55-5	SAMN10696755	B4	B27	DePCR	MT	55C	B	5	FLD0261	CCATATGATC	B	2.5	35094	34767	27347	7000	Inf	3.2212	12.4571	49.7202	B27_DePCR_55C_MT_B_5_.fastq
PRJNA513137	B4-55-6	SAMN10696756	B4	B27	DePCR	MT	55C	B	6	FLD0262	CGATCCTATA	B	2.5	31844	31528	25041	7000	Inf	3.21311	12.4286	48.4618	B27_DePCR_55C_MT_B_6_.fastq
PRJNA513137	B4-55-7	SAMN10696757	B4	B27	DePCR	MT	55C	B	7	FLD0263	TGACTAGCTT	B	2.5	39182	38881	31008	7000	Inf	3.20308	13.0857	47.4407	B27_DePCR_55C_MT_B_7_.fastq
PRJNA513137	B4-55-8	SAMN10696758	B4	B27	DePCR	MT	55C	B	8	FLD0264	TAACTCTGCT	B	2.5	29606	29358	23423	7000	Inf	3.21776	10	49.0259	B27_DePCR_55C_MT_B_8_.fastq
PRJNA513137	B4S-45-1	SAMN10696999	B4	B27	TAS	MT	45C	B	1	FLD0217	TACTAGGATC	B	2.5	26589	26460	23466	7000	Inf	3.35862	42.7143	22.347	B27_TAS_45C_MT_B_1_.fastq
PRJNA513137	B4S-45-2	SAMN10697000	B4	B27	TAS	MT	45C	B	2	FLD0218	GTCTCAATGT	B	2.5	24979	24870	22194	7000	Inf	3.35226	43.9143	23.2924	B27_TAS_45C_MT_B_2_.fastq
PRJNA513137	B4S-45-3	SAMN10697001	B4	B27	TAS	MT	45C	B	3	FLD0219	GATGAGGTAT	B	2.5	25966	25831	22933	7000	Inf	3.34154	44.6857	22.1521	B27_TAS_45C_MT_B_3_.fastq
PRJNA513137	B4S-45-4	SAMN10697002	B4	B27	TAS	MT	45C	B	4	FLD0220	GGTGTTAGTG	B	2.5	25978	25853	22975	7000	Inf	3.33456	40.3714	23.8712	B27_TAS_45C_MT_B_4_.fastq
PRJNA513137	B4S-45-5	SAMN10697003	B4	B27	TAS	MT	45C	B	5	FLD0221	CATTCTCTGA	B	2.5	26578	26437	23353	7000	Inf	3.34019	40.2571	22.3738	B27_TAS_45C_MT_B_5_.fastq
PRJNA513137	B4S-45-6	SAMN10697004	B4	B27	TAS	MT	45C	B	6	FLD0222	CATCTGGAGT	B	2.5	29045	28914	25764	7000	Inf	3.35501	40.9429	23.441	B27_TAS_45C_MT_B_6_.fastq
PRJNA513137	B4S-45-7	SAMN10697005	B4	B27	TAS	MT	45C	B	7	FLD0223	GAATGGAAGA	B	2.5	29743	29637	26236	7000	Inf	3.34237	42.6	23.2008	B27_TAS_45C_MT_B_7_.fastq
PRJNA513137	B4S-45-8	SAMN10697006	B4	B27	TAS	MT	45C	B	8	FLD0224	GGCTGTGATC	B	2.5	30838	30716	27175	7000	Inf	3.34351	41.6	23.2762	B27_TAS_45C_MT_B_8_.fastq
PRJNA513137	B4S-55-1	SAMN10697007	B4	B27	TAS	MT	55C	B	1	FLD0313	CACATTAGCG	B	2.5	23953	23852	21019	7000	Inf	3.3616	34.5714	20.1276	B27_TAS_55C_MT_B_1_.fastq
PRJNA513137	B4S-55-2	SAMN10697008	B4	B27	TAS	MT	55C	B	2	FLD0314	GAAGCGCACT	B	2.5	30814	30705	27120	7000	Inf	3.34426	35.4	21.5828	B27_TAS_55C_MT_B_2_.fastq
PRJNA513137	B4S-55-3	SAMN10697009	B4	B27	TAS	MT	55C	B	3	FLD0315	GCATGCCAGT	B	2.5	25699	25568	22541	7000	Inf	3.35476	31.4857	20.2897	B27_TAS_55C_MT_B_3_.fastq
PRJNA513137	B4S-55-4	SAMN10697010	B4	B27	TAS	MT	55C	B	4	FLD0316	GGAGACTGTA	B	2.5	25432	25318	22530	7000	Inf	3.35105	35.0571	21.9913	B27_TAS_55C_MT_B_4_.fastq
PRJNA513137	B4S-55-5	SAMN10697011	B4	B27	TAS	MT	55C	B	5	FLD0317	TCGAACTGCA	B	2.5	23279	23155	20574	7000	Inf	3.3659	35.1429	21.6471	B27_TAS_55C_MT_B_5_.fastq
PRJNA513137	B4S-55-6	SAMN10697012	B4	B27	TAS	MT	55C	B	6	FLD0318	GAGAGGACAT	B	2.5	26815	26708	23652	7000	Inf	3.3567	34.0857	21.0915	B27_TAS_55C_MT_B_6_.fastq
PRJNA513137	B4S-55-7	SAMN10697013	B4	B27	TAS	MT	55C	B	7	FLD0319	GAGCACGGAA	B	2.5	24421	24324	21438	7000	Inf	3.34074	32.4286	21.5718	B27_TAS_55C_MT_B_7_.fastq
PRJNA513137	B4S-55-8	SAMN10697014	B4	B27	TAS	MT	55C	B	8	FLD0320	GCTCTAACAT	B	2.5	25918	25798	22963	7000	Inf	3.37775	34.8571	20.5905	B27_TAS_55C_MT_B_8_.fastq
PRJNA513137	C1-45-1	SAMN10696759	C1	C01	DePCR	MT	45C	C	1	FLD0073	CGTATGATGT	C	2.5	28081	27737	22751	7000	62.4223	0.269077	21.2198	NA	C01_DePCR_45C_MT_C_1_.fastq
PRJNA513137	C1-45-2	SAMN10696760	C1	C01	DePCR	MT	45C	C	2	FLD0074	TAGTCTGTCA	C	2.5	26265	26003	21370	7000	63.2804	0.268682	19.9341	NA	C01_DePCR_45C_MT_C_2_.fastq
PRJNA513137	C1-45-3	SAMN10696761	C1	C01	DePCR	MT	45C	C	3	FLD0075	TGTCTCTATC	C	2.5	28826	28509	23360	7000	74.7213	0.261527	20.5626	NA	C01_DePCR_45C_MT_C_3_.fastq
PRJNA513137	C1-45-4	SAMN10696762	C1	C01	DePCR	MT	45C	C	4	FLD0076	CTAGAGTATC	C	2.5	25671	25376	20681	7000	63.4326	0.290793	21.4549	NA	C01_DePCR_45C_MT_C_4_.fastq
PRJNA513137	C1-45-5	SAMN10696763	C1	C01	DePCR	MT	45C	C	5	FLD0077	TATCATGTGC	C	2.5	24377	24108	19249	7000	62.1205	0.303236	18.9626	NA	C01_DePCR_45C_MT_C_5_.fastq
PRJNA513137	C1-45-6	SAMN10696764	C1	C01	DePCR	MT	45C	C	6	FLD0078	CATGAGTGTA	C	2.5	27715	27424	22466	7000	69.2747	0.286091	22.0835	NA	C01_DePCR_45C_MT_C_6_.fastq
PRJNA513137	C1-45-7	SAMN10696765	C1	C01	DePCR	MT	45C	C	7	FLD0079	TGTCGTCATA	C	2.5	33451	33127	27241	7000	64.2336	0.298745	23.9626	NA	C01_DePCR_45C_MT_C_7_.fastq
PRJNA513137	C1-45-8	SAMN10696766	C1	C01	DePCR	MT	45C	C	8	FLD0080	TATCTCATGC	C	2.5	23577	23340	18744	7000	73.6377	0.266705	20.1121	NA	C01_DePCR_45C_MT_C_8_.fastq
PRJNA513137	C1-55-1	SAMN10696767	C1	C01	DePCR	MT	55C	C	1	FLD0265	TCGAATGTGC	C	2.5	27282	26968	21628	7000	63	0.342077	23.0703	NA	C01_DePCR_55C_MT_C_1_.fastq
PRJNA513137	C1-55-2	SAMN10696768	C1	C01	DePCR	MT	55C	C	2	FLD0266	TCGCTGAACA	C	2.5	30460	30144	24754	7000	64.9486	0.369004	23.2989	NA	C01_DePCR_55C_MT_C_2_.fastq
PRJNA513137	C1-55-3	SAMN10696769	C1	C01	DePCR	MT	55C	C	3	FLD0267	GCGTTATTGC	C	2.5	45026	44509	36085	7000	60.2806	0.351819	23.2989	NA	C01_DePCR_55C_MT_C_3_.fastq
PRJNA513137	C1-55-4	SAMN10696770	C1	C01	DePCR	MT	55C	C	4	FLD0268	GAACTATCAC	C	2.5	45291	44836	37046	7000	56.484	0.329984	23.6418	NA	C01_DePCR_55C_MT_C_4_.fastq
PRJNA513137	C1-55-5	SAMN10696771	C1	C01	DePCR	MT	55C	C	5	FLD0269	TCGAGGTACT	C	2.5	39693	39258	32100	7000	59.2159	0.348733	23.6703	NA	C01_DePCR_55C_MT_C_5_.fastq
PRJNA513137	C1-55-6	SAMN10696772	C1	C01	DePCR	MT	55C	C	6	FLD0270	TGCGGATGGT	C	2.5	41053	40578	32814	7000	67.3464	0.408244	24.156	NA	C01_DePCR_55C_MT_C_6_.fastq
PRJNA513137	C1-55-7	SAMN10696773	C1	C01	DePCR	MT	55C	C	7	FLD0271	TTCGAGCTAT	C	2.5	26856	26578	21764	7000	59.3234	0.391035	24.356	NA	C01_DePCR_55C_MT_C_7_.fastq
PRJNA513137	C1-55-8	SAMN10696774	C1	C01	DePCR	MT	55C	C	8	FLD0272	GGTCTGGTGT	C	2.5	38729	38268	31382	7000	52.2865	0.372006	25.4418	NA	C01_DePCR_55C_MT_C_8_.fastq
PRJNA513137	C1S-45-1	SAMN10697015	C1	C01	TAS	MT	45C	C	1	FLD0225	TGGTGCTGGA	C	2.5	30543	30393	27045	7000	81.8731	0.0604872	47.5407	NA	C01_TAS_45C_MT_C_1_.fastq
PRJNA513137	C1S-45-2	SAMN10697016	C1	C01	TAS	MT	45C	C	2	FLD0226	TATGGTAAGG	C	2.5	30375	30255	27178	7000	78.8291	0.063238	48.9407	NA	C01_TAS_45C_MT_C_2_.fastq
PRJNA513137	C1S-45-3	SAMN10697017	C1	C01	TAS	MT	45C	C	3	FLD0227	GTTCGATTGT	C	2.5	29675	29536	26741	7000	73.3151	0.0571347	49.5407	NA	C01_TAS_45C_MT_C_3_.fastq
PRJNA513137	C1S-45-4	SAMN10697018	C1	C01	TAS	MT	45C	C	4	FLD0228	GGTAGAATGA	C	2.5	30298	30190	26996	7000	82.7909	0.0616612	47.5912	NA	C01_TAS_45C_MT_C_4_.fastq
PRJNA513137	C1S-45-5	SAMN10697019	C1	C01	TAS	MT	45C	C	5	FLD0229	TTCTCATCGT	C	2.5	28073	27970	25263	7000	84.2573	0.0569136	48.7692	NA	C01_TAS_45C_MT_C_5_.fastq
PRJNA513137	C1S-45-6	SAMN10697020	C1	C01	TAS	MT	45C	C	6	FLD0230	CTCAATCGTA	C	2.5	30807	30661	27683	7000	78.7113	0.0541875	49.4835	NA	C01_TAS_45C_MT_C_6_.fastq
PRJNA513137	C1S-45-7	SAMN10697021	C1	C01	TAS	MT	45C	C	7	FLD0231	CGCTAATGTA	C	2.5	26845	26725	23981	7000	78.4733	0.0714848	48.9121	NA	C01_TAS_45C_MT_C_7_.fastq
PRJNA513137	C1S-45-8	SAMN10697022	C1	C01	TAS	MT	45C	C	8	FLD0232	GCGTCTGAAT	C	2.5	30448	30324	27446	7000	84	0.0590863	49.0198	NA	C01_TAS_45C_MT_C_8_.fastq
PRJNA513137	C1S-55-1	SAMN10697023	C1	C01	TAS	MT	55C	C	1	FLD0321	TGCTGGCTTG	C	2.5	26555	26444	23803	7000	65.0414	0.0652311	60.1121	NA	C01_TAS_55C_MT_C_1_.fastq
PRJNA513137	C1S-55-2	SAMN10697024	C1	C01	TAS	MT	55C	C	2	FLD0322	TGCATGGAGC	C	2.5	22741	22626	20063	7000	72.2127	0.0687527	61.1187	NA	C01_TAS_55C_MT_C_2_.fastq
PRJNA513137	C1S-55-3	SAMN10697025	C1	C01	TAS	MT	55C	C	3	FLD0323	GTACTAAGAG	C	2.5	30520	30395	27449	7000	65.4435	0.0637169	58.4264	NA	C01_TAS_55C_MT_C_3_.fastq
PRJNA513137	C1S-55-4	SAMN10697026	C1	C01	TAS	MT	55C	C	4	FLD0324	GAAGTCAAGC	C	2.5	23311	23212	20698	7000	67.0984	0.0593334	59.0264	NA	C01_TAS_55C_MT_C_4_.fastq
PRJNA513137	C1S-55-5	SAMN10697027	C1	C01	TAS	MT	55C	C	5	FLD0325	GCGCATTATG	C	2.5	26913	26785	24182	7000	67.8546	0.0699234	60.3758	NA	C01_TAS_55C_MT_C_5_.fastq
PRJNA513137	C1S-55-6	SAMN10697028	C1	C01	TAS	MT	55C	C	6	FLD0326	GTCCAGACAT	C	2.5	33716	33576	30395	7000	67.3671	0.0502432	60.1407	NA	C01_TAS_55C_MT_C_6_.fastq
PRJNA513137	C1S-55-7	SAMN10697029	C1	C01	TAS	MT	55C	C	7	FLD0327	GAGACCTCTA	C	2.5	29354	29261	26378	7000	63.1331	0.0560714	60.1978	NA	C01_TAS_55C_MT_C_7_.fastq
PRJNA513137	C1S-55-8	SAMN10697030	C1	C01	TAS	MT	55C	C	8	FLD0328	TTGCACTCAG	C	2.5	26981	26897	24319	7000	64.5298	0.062706	59.8549	NA	C01_TAS_55C_MT_C_8_.fastq
PRJNA513137	C3-45-1	SAMN10696791	C3	C09	DePCR	MT	45C	C	1	FLD0081	TGTGTCACTA	C	2.5	25995	25745	20883	7000	1.89543	2.35023	17.2264	37.0451	C09_DePCR_45C_MT_C_1_.fastq
PRJNA513137	C3-45-2	SAMN10696792	C3	C09	DePCR	MT	45C	C	2	FLD0082	TATCGATGCT	C	2.5	24292	24027	19417	7000	1.84453	2.34	19.2549	35.2761	C09_DePCR_45C_MT_C_2_.fastq
PRJNA513137	C3-45-3	SAMN10696793	C3	C09	DePCR	MT	45C	C	3	FLD0083	TAGAGTCTGT	C	2.5	28561	28274	23009	7000	1.99223	2.31529	19.3121	36.1478	C09_DePCR_45C_MT_C_3_.fastq
PRJNA513137	C3-45-4	SAMN10696794	C3	C09	DePCR	MT	45C	C	4	FLD0084	CATGCATCAT	C	2.5	20567	20363	16443	7000	2.0208	2.29914	20.9407	39.051	C09_DePCR_45C_MT_C_4_.fastq
PRJNA513137	C3-45-5	SAMN10696795	C3	C09	DePCR	MT	45C	C	5	FLD0085	TGATCAGTCA	C	2.5	28512	28236	22953	7000	1.56889	2.31766	17.7187	41.5609	C09_DePCR_45C_MT_C_5_.fastq
PRJNA513137	C3-45-6	SAMN10696796	C3	C09	DePCR	MT	45C	C	6	FLD0086	CGTCTATGAT	C	2.5	18544	18334	14911	7000	1.89373	2.32009	17.9121	37.0649	C09_DePCR_45C_MT_C_6_.fastq
PRJNA513137	C3-45-7	SAMN10696797	C3	C09	DePCR	MT	45C	C	7	FLD0087	GTGATACTGA	C	2.5	33422	33081	26819	7000	2.02992	2.33244	19.8484	37.2883	C09_DePCR_45C_MT_C_7_.fastq
PRJNA513137	C3-45-8	SAMN10696798	C3	C09	DePCR	MT	45C	C	8	FLD0088	CTAGATCTGA	C	2.5	19064	18864	15301	7000	1.59168	2.33186	20.3692	38.0136	C09_DePCR_45C_MT_C_8_.fastq
PRJNA513137	C3-55-1	SAMN10696799	C3	C09	DePCR	MT	55C	C	1	FLD0273	CTAAGTCATG	C	2.5	28027	27770	22489	7000	0.651585	2.30674	15.0044	42.0719	C09_DePCR_55C_MT_C_1_.fastq
PRJNA513137	C3-55-2	SAMN10696800	C3	C09	DePCR	MT	55C	C	2	FLD0274	TTGCAGATCA	C	2.5	28084	27791	22653	7000	0.686179	2.31725	16.3187	41.6356	C09_DePCR_55C_MT_C_2_.fastq
PRJNA513137	C3-55-3	SAMN10696801	C3	C09	DePCR	MT	55C	C	3	FLD0275	CTGCGAATGT	C	2.5	34290	33932	27410	7000	0.679	2.30781	15.3758	42.6819	C09_DePCR_55C_MT_C_3_.fastq
PRJNA513137	C3-55-4	SAMN10696802	C3	C09	DePCR	MT	55C	C	4	FLD0276	CTGTTCTAGC	C	2.5	29222	28930	22999	7000	0.636324	2.30809	18.833	41.1922	C09_DePCR_55C_MT_C_4_.fastq
PRJNA513137	C3-55-5	SAMN10696803	C3	C09	DePCR	MT	55C	C	5	FLD0277	CACTTGTGTG	C	2.5	29934	29634	23799	7000	0.612873	2.29425	15.6901	41.2599	C09_DePCR_55C_MT_C_5_.fastq
PRJNA513137	C3-55-6	SAMN10696804	C3	C09	DePCR	MT	55C	C	6	FLD0278	TGGATGACAT	C	2.5	46853	46440	37793	7000	0.597197	2.28703	14.3473	42.3595	C09_DePCR_55C_MT_C_6_.fastq
PRJNA513137	C3-55-7	SAMN10696805	C3	C09	DePCR	MT	55C	C	7	FLD0279	GATCCTGAGC	C	2.5	40867	40428	31909	7000	0.640577	2.30751	16.8901	42.0185	C09_DePCR_55C_MT_C_7_.fastq
PRJNA513137	C3-55-8	SAMN10696806	C3	C09	DePCR	MT	55C	C	8	FLD0280	GTCGGTCTGA	C	2.5	36998	36635	29490	7000	0.630561	2.29663	15.8396	41.9929	C09_DePCR_55C_MT_C_8_.fastq
PRJNA513137	C3S-45-1	SAMN10697047	C3	C09	TAS	MT	45C	C	1	FLD0233	TTCTGTTGCC	C	2.5	28720	28581	25591	7000	5.95946	2.34086	47.7978	21.6092	C09_TAS_45C_MT_C_1_.fastq
PRJNA513137	C3S-45-2	SAMN10697048	C3	C09	TAS	MT	45C	C	2	FLD0234	TTGTCCTTGC	C	2.5	31796	31664	28129	7000	5.6509	2.33803	48.8264	19.495	C09_TAS_45C_MT_C_2_.fastq
PRJNA513137	C3S-45-3	SAMN10697049	C3	C09	TAS	MT	45C	C	3	FLD0235	CCTGTGTAGA	C	2.5	31608	31449	27916	7000	5.69155	2.33548	49.1692	20.1097	C09_TAS_45C_MT_C_3_.fastq
PRJNA513137	C3S-45-4	SAMN10697050	C3	C09	TAS	MT	45C	C	4	FLD0236	GATAAGAAGG	C	2.5	28726	28590	25569	7000	5.74518	2.33202	49.7187	20.2224	C09_TAS_45C_MT_C_4_.fastq
PRJNA513137	C3S-45-5	SAMN10697051	C3	C09	TAS	MT	45C	C	5	FLD0237	CAGGTCACAT	C	2.5	27069	26947	24025	7000	5.83177	2.33042	49.1978	20.8641	C09_TAS_45C_MT_C_5_.fastq
PRJNA513137	C3S-45-6	SAMN10697052	C3	C09	TAS	MT	45C	C	6	FLD0238	GCCATGTCAT	C	2.5	28695	28557	25552	7000	5.74933	2.34452	48.6835	19.755	C09_TAS_45C_MT_C_6_.fastq
PRJNA513137	C3S-45-7	SAMN10697053	C3	C09	TAS	MT	45C	C	7	FLD0239	TCTGCCTATA	C	2.5	25509	25415	22744	7000	5.71894	2.34121	50.0835	19.6521	C09_TAS_45C_MT_C_7_.fastq
PRJNA513137	C3S-45-8	SAMN10697054	C3	C09	TAS	MT	45C	C	8	FLD0240	CTTAGTTCGC	C	2.5	27923	27778	24622	7000	5.63692	2.32097	49.9099	20.9074	C09_TAS_45C_MT_C_8_.fastq
PRJNA513137	C3S-55-1	SAMN10697055	C3	C09	TAS	MT	55C	C	1	FLD0329	TGCGGCGATA	C	2.5	24127	24039	21125	7000	4.42731	2.3442	34.8835	18.4773	C09_TAS_55C_MT_C_1_.fastq
PRJNA513137	C3S-55-2	SAMN10697056	C3	C09	TAS	MT	55C	C	2	FLD0330	AGTTGCTAGT	C	2.5	26456	26332	23513	7000	4.50092	2.3494	32.2835	20.3485	C09_TAS_55C_MT_C_2_.fastq
PRJNA513137	C3S-55-3	SAMN10697057	C3	C09	TAS	MT	55C	C	3	FLD0331	AGGATTGAGG	C	2.5	30845	30687	27493	7000	4.57975	2.35229	33.7758	20.2555	C09_TAS_55C_MT_C_3_.fastq
PRJNA513137	C3S-55-4	SAMN10697058	C3	C09	TAS	MT	55C	C	4	FLD0332	CCAGAACAGA	C	2.5	24465	24312	21548	7000	4.5812	2.3443	35.2044	19.4216	C09_TAS_55C_MT_C_4_.fastq
PRJNA513137	C3S-55-5	SAMN10697059	C3	C09	TAS	MT	55C	C	5	FLD0333	CGTCAAGCAT	C	2.5	25619	25485	22649	7000	4.60308	2.33607	33.9692	19.1182	C09_TAS_55C_MT_C_5_.fastq
PRJNA513137	C3S-55-6	SAMN10697060	C3	C09	TAS	MT	55C	C	6	FLD0334	TTGTCGAGAC	C	2.5	27223	27129	24353	7000	4.35206	2.33771	32.7121	20.5231	C09_TAS_55C_MT_C_6_.fastq
PRJNA513137	C3S-55-7	SAMN10697061	C3	C09	TAS	MT	55C	C	7	FLD0335	GACAGGTGAC	C	2.5	25662	25560	22837	7000	4.42683	2.34144	33.4835	20.3296	C09_TAS_55C_MT_C_7_.fastq
PRJNA513137	C3S-55-8	SAMN10697062	C3	C09	TAS	MT	55C	C	8	FLD0336	CTGACAAGTG	C	2.5	26914	26754	24055	7000	4.35627	2.33715	34.033	19.7098	C09_TAS_55C_MT_C_8_.fastq
PRJNA513137	C2-45-1	SAMN10696775	C2	C10	DePCR	MT	45C	C	1	FLD0089	TATCAGTCTG	C	2.5	23399	23177	18888	7000	2.06445	2.23003	18.0549	31.6509	C10_DePCR_45C_MT_C_1_.fastq
PRJNA513137	C2-45-2	SAMN10696776	C2	C10	DePCR	MT	45C	C	2	FLD0090	TCAGATGCTA	C	2.5	28498	28234	22916	7000	2.1739	2.25884	19.633	35.9162	C10_DePCR_45C_MT_C_2_.fastq
PRJNA513137	C2-45-3	SAMN10696777	C2	C10	DePCR	MT	45C	C	3	FLD0091	TATGTACGTG	C	2.5	23609	23351	18716	7000	2.10928	2.24492	20.9187	33.5121	C10_DePCR_45C_MT_C_3_.fastq
PRJNA513137	C2-45-4	SAMN10696778	C2	C10	DePCR	MT	45C	C	4	FLD0092	CTATACAGTG	C	2.5	32572	32283	26006	7000	2.26531	2.26556	21.033	33.5677	C10_DePCR_45C_MT_C_4_.fastq
PRJNA513137	C2-45-5	SAMN10696779	C2	C10	DePCR	MT	45C	C	5	FLD0093	TGATACTCTG	C	2.5	1911	1894	1535	7000	2.01905	NA	NA	31.5567	C10_DePCR_45C_MT_C_5_.fastq
PRJNA513137	C2-45-6	SAMN10696780	C2	C10	DePCR	MT	45C	C	6	FLD0094	TCAGCGATAT	C	2.5	20869	20631	16492	7000	2.27134	2.24119	20.9758	35.2616	C10_DePCR_45C_MT_C_6_.fastq
PRJNA513137	C2-45-7	SAMN10696781	C2	C10	DePCR	MT	45C	C	7	FLD0095	CTACTGATGA	C	2.5	18607	18412	14836	7000	1.72671	2.25036	22.3187	33.0864	C10_DePCR_45C_MT_C_7_.fastq
PRJNA513137	C2-45-8	SAMN10696782	C2	C10	DePCR	MT	45C	C	8	FLD0096	GTAGTACACA	C	2.5	38665	38351	31146	7000	2.20428	2.24206	18.3912	32.1101	C10_DePCR_45C_MT_C_8_.fastq
PRJNA513137	C2-55-1	SAMN10696783	C2	C10	DePCR	MT	55C	C	1	FLD0281	TGTTACGATC	C	2.5	31585	31289	24825	7000	0.748448	2.23545	15.1187	41.6371	C10_DePCR_55C_MT_C_1_.fastq
PRJNA513137	C2-55-2	SAMN10696784	C2	C10	DePCR	MT	55C	C	2	FLD0282	GTCTTGGCTC	C	2.5	31512	31209	24880	7000	0.809748	2.22807	12.4549	42.4835	C10_DePCR_55C_MT_C_2_.fastq
PRJNA513137	C2-55-3	SAMN10696785	C2	C10	DePCR	MT	55C	C	3	FLD0283	GGTCGTGCAT	C	2.5	47160	46697	36436	7000	0.767862	2.22113	15.0681	40.2668	C10_DePCR_55C_MT_C_3_.fastq
PRJNA513137	C2-55-4	SAMN10696786	C2	C10	DePCR	MT	55C	C	4	FLD0284	CAGGCTCAGT	C	2.5	35038	34719	27902	7000	0.775636	2.22659	13.5033	41.7062	C10_DePCR_55C_MT_C_4_.fastq
PRJNA513137	C2-55-5	SAMN10696787	C2	C10	DePCR	MT	55C	C	5	FLD0285	TAGCTTCACT	C	2.5	35662	35332	28882	7000	0.735159	2.23105	14.9187	41.3188	C10_DePCR_55C_MT_C_5_.fastq
PRJNA513137	C2-55-6	SAMN10696788	C2	C10	DePCR	MT	55C	C	6	FLD0286	CAGATGTCCT	C	2.5	36404	36083	29397	7000	0.754096	2.21568	15.5187	38.8354	C10_DePCR_55C_MT_C_6_.fastq
PRJNA513137	C2-55-7	SAMN10696789	C2	C10	DePCR	MT	55C	C	7	FLD0287	TTACGCAGTG	C	2.5	26568	26316	21013	7000	0.768836	2.2104	13.3473	40.3323	C10_DePCR_55C_MT_C_7_.fastq
PRJNA513137	C2-55-8	SAMN10696790	C2	C10	DePCR	MT	55C	C	8	FLD0288	TTCGTTCCTG	C	2.5	24228	23995	19495	7000	0.729524	2.22452	14.5187	39.704	C10_DePCR_55C_MT_C_8_.fastq
PRJNA513137	C2S-45-1	SAMN10697031	C2	C10	TAS	MT	45C	C	1	FLD0241	CGTAATGAGC	C	2.5	31613	31450	27908	7000	6.24019	2.29896	47.8242	19.9881	C10_TAS_45C_MT_C_1_.fastq
PRJNA513137	C2S-45-2	SAMN10697032	C2	C10	TAS	MT	45C	C	2	FLD0242	TTGCTTAGTC	C	2.5	27782	27671	24814	7000	6.4166	2.27085	47.7956	19.6866	C10_TAS_45C_MT_C_2_.fastq
PRJNA513137	C2S-45-3	SAMN10697033	C2	C10	TAS	MT	45C	C	3	FLD0243	TCTTGTTCAC	C	2.5	30387	30250	27052	7000	6.1463	2.29306	48.5099	19.6323	C10_TAS_45C_MT_C_3_.fastq
PRJNA513137	C2S-45-4	SAMN10697034	C2	C10	TAS	MT	45C	C	4	FLD0244	GTGGCTTCGT	C	2.5	26226	26072	23115	7000	6.51411	2.28476	51.1385	19.4231	C10_TAS_45C_MT_C_4_.fastq
PRJNA513137	C2S-45-5	SAMN10697035	C2	C10	TAS	MT	45C	C	5	FLD0245	TGTTCGATAG	C	2.5	29212	29095	25973	7000	6.06094	2.28592	49.0813	21.0861	C10_TAS_45C_MT_C_5_.fastq
PRJNA513137	C2S-45-6	SAMN10697036	C2	C10	TAS	MT	45C	C	6	FLD0246	TCATTCAGTG	C	2.5	26186	26050	23360	7000	6.39535	2.27544	48.9385	19.4731	C10_TAS_45C_MT_C_6_.fastq
PRJNA513137	C2S-45-7	SAMN10697037	C2	C10	TAS	MT	45C	C	7	FLD0247	GTGGAGAGCT	C	2.5	26579	26444	23752	7000	6.29507	2.27331	49.3956	19.1147	C10_TAS_45C_MT_C_7_.fastq
PRJNA513137	C2S-45-8	SAMN10697038	C2	C10	TAS	MT	45C	C	8	FLD0248	GTAGAAGTGG	C	2.5	28115	27978	24891	7000	6.38357	2.27404	47.7978	18.2958	C10_TAS_45C_MT_C_8_.fastq
PRJNA513137	C2S-55-1	SAMN10697039	C2	C10	TAS	MT	55C	C	1	FLD0337	CACGAAGAGC	C	2.5	24438	24311	21358	7000	5.12631	2.29308	31.8044	16.7101	C10_TAS_55C_MT_C_1_.fastq
PRJNA513137	C2S-55-2	SAMN10697040	C2	C10	TAS	MT	55C	C	2	FLD0338	CATACCTGAT	C	2.5	26552	26411	23605	7000	4.64307	2.28118	33.4549	16.7718	C10_TAS_55C_MT_C_2_.fastq
PRJNA513137	C2S-55-3	SAMN10697041	C2	C10	TAS	MT	55C	C	3	FLD0339	GACGTGCTTC	C	2.5	20386	20268	17976	7000	4.9896	2.28599	35.0615	18.8351	C10_TAS_55C_MT_C_3_.fastq
PRJNA513137	C2S-55-4	SAMN10697042	C2	C10	TAS	MT	55C	C	4	FLD0340	ATTGTGGAGT	C	2.5	26420	26262	23497	7000	4.84751	2.28771	33.433	18.9598	C10_TAS_55C_MT_C_4_.fastq
PRJNA513137	C2S-55-5	SAMN10697043	C2	C10	TAS	MT	55C	C	5	FLD0341	TCTGGTCTCA	C	2.5	21560	21445	19187	7000	5.01155	2.29554	33.1121	17.5268	C10_TAS_55C_MT_C_5_.fastq
PRJNA513137	C2S-55-6	SAMN10697044	C2	C10	TAS	MT	55C	C	6	FLD0342	AGGTAAGAGG	C	2.5	29203	29059	25873	7000	4.83529	2.29465	37.0615	17.2253	C10_TAS_55C_MT_C_6_.fastq
PRJNA513137	C2S-55-7	SAMN10697045	C2	C10	TAS	MT	55C	C	7	FLD0343	TCCTGACAGA	C	2.5	25320	25215	22386	7000	4.86333	2.28849	34.9407	18.6404	C10_TAS_55C_MT_C_7_.fastq
PRJNA513137	C2S-55-8	SAMN10697046	C2	C10	TAS	MT	55C	C	8	FLD0344	GCACTGTTGC	C	2.5	24251	24138	21399	7000	4.9369	2.28292	35.0549	18.4741	C10_TAS_55C_MT_C_8_.fastq
PRJNA513137	D1-45-1	SAMN10696807	D1	D01	DePCR	MT	45C	D	1	FLD0097	TGCTACATCA	D	2.5	26583	26343	21862	7000	6.74516	0.346505	19.6286	NA	D01_DePCR_45C_MT_D_1_.fastq
PRJNA513137	D1-45-2	SAMN10696808	D1	D01	DePCR	MT	45C	D	2	FLD0098	AGTGTGTCTA	D	2.5	46973	46368	38114	7000	6.08926	0.378107	21.1143	NA	D01_DePCR_45C_MT_D_2_.fastq
PRJNA513137	D1-45-3	SAMN10696809	D1	D01	DePCR	MT	45C	D	3	FLD0099	TCATATCGCG	D	2.5	21124	20926	16985	7000	7.42843	0.327413	18.0857	NA	D01_DePCR_45C_MT_D_3_.fastq
PRJNA513137	D1-45-4	SAMN10696810	D1	D01	DePCR	MT	45C	D	4	FLD0100	TACGTATAGC	D	2.5	9509	9415	7339	7000	6.36691	NA	NA	NA	D01_DePCR_45C_MT_D_4_.fastq
PRJNA513137	D1-45-5	SAMN10696811	D1	D01	DePCR	MT	45C	D	5	FLD0101	CAGCTATAGC	D	2.5	14365	14225	11268	7000	7.32753	0.321571	19.6	NA	D01_DePCR_45C_MT_D_5_.fastq
PRJNA513137	D1-45-6	SAMN10696812	D1	D01	DePCR	MT	45C	D	6	FLD0102	TCGATGCGCT	D	2.5	25686	25408	20691	7000	6.84427	0.300893	18.4	NA	D01_DePCR_45C_MT_D_6_.fastq
PRJNA513137	D1-45-7	SAMN10696813	D1	D01	DePCR	MT	45C	D	7	FLD0103	GCACGCGTAT	D	2.5	19249	19016	15600	7000	6.71024	0.383312	23.1714	NA	D01_DePCR_45C_MT_D_7_.fastq
PRJNA513137	D1-45-8	SAMN10696814	D1	D01	DePCR	MT	45C	D	8	FLD0104	GCAGTATGCG	D	2.5	31063	30702	24633	7000	6.65003	0.347082	21.0571	NA	D01_DePCR_45C_MT_D_8_.fastq
PRJNA513137	D1-55-1	SAMN10696815	D1	D01	DePCR	MT	55C	D	1	FLD0289	CACTGCTTGA	D	2.5	24637	24413	20108	7000	7.01815	0.544964	29.2857	NA	D01_DePCR_55C_MT_D_1_.fastq
PRJNA513137	D1-55-2	SAMN10696816	D1	D01	DePCR	MT	55C	D	2	FLD0290	TCTAGCGTGG	D	2.5	30792	30485	24576	7000	7.00063	0.543051	27.6	NA	D01_DePCR_55C_MT_D_2_.fastq
PRJNA513137	D1-55-3	SAMN10696817	D1	D01	DePCR	MT	55C	D	3	FLD0291	GCATAATCGC	D	2.5	36513	36117	29300	7000	6.71669	0.500622	29.1429	NA	D01_DePCR_55C_MT_D_3_.fastq
PRJNA513137	D1-55-4	SAMN10696818	D1	D01	DePCR	MT	55C	D	4	FLD0292	GTCGTAACAC	D	2.5	36378	36008	29837	7000	6.6258	0.514556	27.5429	NA	D01_DePCR_55C_MT_D_4_.fastq
PRJNA513137	D1-55-5	SAMN10696819	D1	D01	DePCR	MT	55C	D	5	FLD0293	GAGATTGCTA	D	2.5	39965	39621	32734	7000	6.77943	0.504136	27.0571	NA	D01_DePCR_55C_MT_D_5_.fastq
PRJNA513137	D1-55-6	SAMN10696820	D1	D01	DePCR	MT	55C	D	6	FLD0294	GGACAGATGG	D	2.5	43163	42758	34977	7000	6.75112	0.519036	26.6	NA	D01_DePCR_55C_MT_D_6_.fastq
PRJNA513137	D1-55-7	SAMN10696821	D1	D01	DePCR	MT	55C	D	7	FLD0295	CTTACGTTGC	D	2.5	23263	23034	18464	7000	7.23792	0.57553	26.6857	NA	D01_DePCR_55C_MT_D_7_.fastq
PRJNA513137	D1-55-8	SAMN10696822	D1	D01	DePCR	MT	55C	D	8	FLD0296	GTGTTCGGTC	D	2.5	37514	37084	30064	7000	6.45277	0.508558	29.0571	NA	D01_DePCR_55C_MT_D_8_.fastq
PRJNA513137	D1S-45-1	SAMN10697063	D1	D01	TAS	MT	45C	D	1	FLD0249	TGGAGCATGT	D	2.5	31201	31056	28216	7000	4.03719	0.0620374	66.3143	NA	D01_TAS_45C_MT_D_1_.fastq
PRJNA513137	D1S-45-2	SAMN10697064	D1	D01	TAS	MT	45C	D	2	FLD0250	GAAGGAGATA	D	2.5	29454	29336	26666	7000	4.06711	0.067697	65.7714	NA	D01_TAS_45C_MT_D_2_.fastq
PRJNA513137	D1S-45-3	SAMN10697065	D1	D01	TAS	MT	45C	D	3	FLD0251	CGAATGTATG	D	2.5	33468	33330	30150	7000	3.78359	0.0531973	66.2	NA	D01_TAS_45C_MT_D_3_.fastq
PRJNA513137	D1S-45-4	SAMN10697066	D1	D01	TAS	MT	45C	D	4	FLD0252	TCGTGAATGA	D	2.5	29655	29535	26771	7000	3.95586	0.0702736	65.4857	NA	D01_TAS_45C_MT_D_4_.fastq
PRJNA513137	D1S-45-5	SAMN10697067	D1	D01	TAS	MT	45C	D	5	FLD0253	GAATAGCTGA	D	2.5	32384	32261	29212	7000	3.92327	0.0721493	65.9429	NA	D01_TAS_45C_MT_D_5_.fastq
PRJNA513137	D1S-45-6	SAMN10697068	D1	D01	TAS	MT	45C	D	6	FLD0254	TTGTCACATC	D	2.5	29672	29559	26717	7000	3.94614	0.0602105	65.9143	NA	D01_TAS_45C_MT_D_6_.fastq
PRJNA513137	D1S-45-7	SAMN10697069	D1	D01	TAS	MT	45C	D	7	FLD0255	CTGGAGGCTA	D	2.5	27414	27272	24393	7000	3.99546	0.0628781	66.5429	NA	D01_TAS_45C_MT_D_7_.fastq
PRJNA513137	D1S-45-8	SAMN10697070	D1	D01	TAS	MT	45C	D	8	FLD0256	TGTCAGCTTA	D	2.5	30279	30173	27329	7000	4.02416	0.0587202	65.4571	NA	D01_TAS_45C_MT_D_8_.fastq
PRJNA513137	D1S-55-1	SAMN10697071	D1	D01	TAS	MT	55C	D	1	FLD0345	ACCATGAGTC	D	2.5	27267	27135	24618	7000	5.73114	0.0572496	71.3143	NA	D01_TAS_55C_MT_D_1_.fastq
PRJNA513137	D1S-55-2	SAMN10697072	D1	D01	TAS	MT	55C	D	2	FLD0346	AATGCAGTGT	D	2.5	30957	30809	27899	7000	5.68319	0.0666488	71.3429	NA	D01_TAS_55C_MT_D_2_.fastq
PRJNA513137	D1S-55-3	SAMN10697073	D1	D01	TAS	MT	55C	D	3	FLD0347	ATATGGTGGA	D	2.5	28039	27883	25078	7000	5.99349	0.0627837	70.8857	NA	D01_TAS_55C_MT_D_3_.fastq
PRJNA513137	D1S-55-4	SAMN10697074	D1	D01	TAS	MT	55C	D	4	FLD0348	ACTCAGTTAC	D	2.5	31942	31785	28713	7000	5.64844	0.0667198	70.5714	NA	D01_TAS_55C_MT_D_4_.fastq
PRJNA513137	D1S-55-5	SAMN10697075	D1	D01	TAS	MT	55C	D	5	FLD0349	AAGTGCGATG	D	2.5	24473	24320	21912	7000	5.99335	0.0750589	71.0571	NA	D01_TAS_55C_MT_D_5_.fastq
PRJNA513137	D1S-55-6	SAMN10697076	D1	D01	TAS	MT	55C	D	6	FLD0350	CCACAGAGTG	D	2.5	27490	27339	24772	7000	5.69792	0.0613103	70.9143	NA	D01_TAS_55C_MT_D_6_.fastq
PRJNA513137	D1S-55-7	SAMN10697077	D1	D01	TAS	MT	55C	D	7	FLD0351	AGTGGTGATC	D	2.5	26453	26322	23854	7000	5.89687	0.057727	70.8	NA	D01_TAS_55C_MT_D_7_.fastq
PRJNA513137	D1S-55-8	SAMN10697078	D1	D01	TAS	MT	55C	D	8	FLD0352	ACTTCTTAGC	D	2.5	26285	26161	23549	7000	5.88853	0.0678279	70.8286	NA	D01_TAS_55C_MT_D_8_.fastq
PRJNA513137	D2-45-1	SAMN10696823	D2	D10	DePCR	MT	45C	D	1	FLD0105	TGATAGAGAG	D	2.5	22515	22329	18081	7000	4.0687	2.24146	9.88571	34.0361	D10_DePCR_45C_MT_D_1_.fastq
PRJNA513137	D2-45-2	SAMN10696824	D2	D10	DePCR	MT	45C	D	2	FLD0106	GCTACTAGCG	D	2.5	24098	23845	19020	7000	3.30685	2.22332	10.2762	40.0763	D10_DePCR_45C_MT_D_2_.fastq
PRJNA513137	D2-45-3	SAMN10696825	D2	D10	DePCR	MT	45C	D	3	FLD0107	TGCGAGACGT	D	2.5	22752	22534	17952	7000	4.31878	2.24115	10.8	33.607	D10_DePCR_45C_MT_D_3_.fastq
PRJNA513137	D2-45-4	SAMN10696826	D2	D10	DePCR	MT	45C	D	4	FLD0108	CGATGACAGA	D	2.5	26538	26300	21134	7000	4.41767	2.25882	10.0571	34.1167	D10_DePCR_45C_MT_D_4_.fastq
PRJNA513137	D2-45-5	SAMN10696827	D2	D10	DePCR	MT	45C	D	5	FLD0109	GACTCATGCT	D	2.5	24433	24218	19785	7000	3.43212	2.21613	7.4381	39.1418	D10_DePCR_45C_MT_D_5_.fastq
PRJNA513137	D2-45-6	SAMN10696828	D2	D10	DePCR	MT	45C	D	6	FLD0110	GTCTGATACG	D	2.5	28027	27745	22285	7000	3.54932	2.24312	8.82857	36.0927	D10_DePCR_45C_MT_D_6_.fastq
PRJNA513137	D2-45-7	SAMN10696829	D2	D10	DePCR	MT	45C	D	7	FLD0111	ACTAGCTGTC	D	2.5	42952	42435	34233	7000	3.12183	2.21881	9.67619	42.8343	D10_DePCR_45C_MT_D_7_.fastq
PRJNA513137	D2-45-8	SAMN10696830	D2	D10	DePCR	MT	45C	D	8	FLD0112	GCGTAGACGA	D	2.5	19214	18691	14687	7000	2.96595	2.22017	9.30476	43.5799	D10_DePCR_45C_MT_D_8_.fastq
PRJNA513137	D2-55-1	SAMN10696831	D2	D10	DePCR	MT	55C	D	1	FLD0297	CTCAAGAAGC	D	2.5	26441	26226	20809	7000	1.48648	1.89185	15.6476	89.2992	D10_DePCR_55C_MT_D_1_.fastq
PRJNA513137	D2-55-2	SAMN10696832	D2	D10	DePCR	MT	55C	D	2	FLD0298	TCTCGGATAG	D	2.5	25810	25537	20371	7000	1.51384	1.92161	17.3048	87.315	D10_DePCR_55C_MT_D_2_.fastq
PRJNA513137	D2-55-3	SAMN10696833	D2	D10	DePCR	MT	55C	D	3	FLD0299	CTCTGGACGA	D	2.5	33346	33060	26216	7000	1.41272	1.87312	17.1619	91.568	D10_DePCR_55C_MT_D_3_.fastq
PRJNA513137	D2-55-4	SAMN10696834	D2	D10	DePCR	MT	55C	D	4	FLD0300	CGAGCATTGT	D	2.5	24922	24680	19709	7000	1.36031	1.89568	16.5333	88.8437	D10_DePCR_55C_MT_D_4_.fastq
PRJNA513137	D2-55-5	SAMN10696835	D2	D10	DePCR	MT	55C	D	5	FLD0301	CCAAGAAGAA	D	2.5	39692	39325	31685	7000	1.41907	1.92042	18.219	89.5996	D10_DePCR_55C_MT_D_5_.fastq
PRJNA513137	D2-55-6	SAMN10696836	D2	D10	DePCR	MT	55C	D	6	FLD0302	TCCTTGTTCT	D	2.5	2874	2823	2233	7000	0.73012	NA	NA	92.7019	D10_DePCR_55C_MT_D_6_.fastq
PRJNA513137	D2-55-7	SAMN10696837	D2	D10	DePCR	MT	55C	D	7	FLD0303	GTAACGATGT	D	2.5	43015	42602	33211	7000	1.5133	1.91714	20.0762	86.9927	D10_DePCR_55C_MT_D_7_.fastq
PRJNA513137	D2-55-8	SAMN10696838	D2	D10	DePCR	MT	55C	D	8	FLD0304	TGGACTCAGA	D	2.5	28699	28451	22793	7000	1.52437	1.90068	17.1905	88.5936	D10_DePCR_55C_MT_D_8_.fastq
PRJNA513137	D2S-45-1	SAMN10697079	D2	D10	TAS	MT	45C	D	1	FLD0257	GTTCTTCGTA	D	2.5	30771	30609	27733	7000	11.307	2.34746	44.1429	15.1868	D10_TAS_45C_MT_D_1_.fastq
PRJNA513137	D2S-45-2	SAMN10697080	D2	D10	TAS	MT	45C	D	2	FLD0258	TTACACGTTC	D	2.5	29168	29054	26288	7000	11.3164	2.3586	45.0286	17.9097	D10_TAS_45C_MT_D_2_.fastq
PRJNA513137	D2S-45-3	SAMN10697081	D2	D10	TAS	MT	45C	D	3	FLD0259	GTAGCCAGTA	D	2.5	26246	26141	23434	7000	11.6348	2.35047	44.5714	18.4302	D10_TAS_45C_MT_D_3_.fastq
PRJNA513137	D2S-45-4	SAMN10697082	D2	D10	TAS	MT	45C	D	4	FLD0260	TGAGAAGGTA	D	2.5	31827	31693	28625	7000	11.3069	2.34519	45	16.2778	D10_TAS_45C_MT_D_4_.fastq
PRJNA513137	D2S-45-5	SAMN10697083	D2	D10	TAS	MT	45C	D	5	FLD0261	CCATATGATC	D	2.5	25754	25620	22911	7000	11.6532	2.34566	45.7143	16.5933	D10_TAS_45C_MT_D_5_.fastq
PRJNA513137	D2S-45-6	SAMN10697084	D2	D10	TAS	MT	45C	D	6	FLD0262	CGATCCTATA	D	2.5	24648	24538	22063	7000	11.1329	2.35515	45.2	16.9194	D10_TAS_45C_MT_D_6_.fastq
PRJNA513137	D2S-45-7	SAMN10697085	D2	D10	TAS	MT	45C	D	7	FLD0263	TGACTAGCTT	D	2.5	24909	24800	22402	7000	11.5637	2.35176	45.5714	16.7662	D10_TAS_45C_MT_D_7_.fastq
PRJNA513137	D2S-45-8	SAMN10697086	D2	D10	TAS	MT	45C	D	8	FLD0264	TAACTCTGCT	D	2.5	25293	25176	22744	7000	11.1182	2.35077	46.1143	15.6244	D10_TAS_45C_MT_D_8_.fastq
PRJNA513137	D2S-55-1	SAMN10697087	D2	D10	TAS	MT	55C	D	1	FLD0353	GCCACATATA	D	2.5	25601	25491	22937	7000	9.12401	2.36306	36.1143	15.1172	D10_TAS_55C_MT_D_1_.fastq
PRJNA513137	D2S-55-2	SAMN10697088	D2	D10	TAS	MT	55C	D	2	FLD0354	ACGCAGGAGT	D	2.5	29209	29014	26001	7000	9.40089	2.35667	36.4857	14.2179	D10_TAS_55C_MT_D_2_.fastq
PRJNA513137	D2S-55-3	SAMN10697089	D2	D10	TAS	MT	55C	D	3	FLD0355	AATATGCTGC	D	2.5	20625	20502	18239	7000	9.39924	2.35745	37	16.6303	D10_TAS_55C_MT_D_3_.fastq
PRJNA513137	D2S-55-4	SAMN10697090	D2	D10	TAS	MT	55C	D	4	FLD0356	AAGCGTAGAA	D	2.5	6210	6189	5573	7000	9.76552	NA	NA	16.2588	D10_TAS_55C_MT_D_4_.fastq
PRJNA513137	D2S-55-5	SAMN10697091	D2	D10	TAS	MT	55C	D	5	FLD0357	GACAGCAAGC	D	2.5	21433	21335	18894	7000	9.43306	2.35721	38.0857	15.2601	D10_TAS_55C_MT_D_5_.fastq
PRJNA513137	D2S-55-6	SAMN10697092	D2	D10	TAS	MT	55C	D	6	FLD0358	CTGACCGAGA	D	2.5	24865	24736	22073	7000	9.30626	2.36525	36.3429	14.2651	D10_TAS_55C_MT_D_6_.fastq
PRJNA513137	D2S-55-7	SAMN10697093	D2	D10	TAS	MT	55C	D	7	FLD0359	CGCGACTTGT	D	2.5	27110	27000	24659	7000	8.96787	2.35542	37.2286	14.7701	D10_TAS_55C_MT_D_7_.fastq
PRJNA513137	D2S-55-8	SAMN10697094	D2	D10	TAS	MT	55C	D	8	FLD0360	CATCAACATG	D	2.5	26631	26497	23933	7000	8.85168	2.35132	34.7714	14.0664	D10_TAS_55C_MT_D_8_.fastq
PRJNA513137	E1-45-1	SAMN10696839	E1	E01	DePCR	MT	45C	E	1	FLD0113	CTCAGCAGTG	E	2.5	17954	17755	14378	7000	4.8056	0.182389	5.42857	NA	E01_DePCR_45C_MT_E_1_.fastq
PRJNA513137	E1-45-2	SAMN10696840	E1	E01	DePCR	MT	45C	E	2	FLD0114	CAGTCTACAT	E	2.5	24672	24411	20002	7000	4.96807	0.208295	5.8	NA	E01_DePCR_45C_MT_E_2_.fastq
PRJNA513137	E1-45-3	SAMN10696841	E1	E01	DePCR	MT	45C	E	3	FLD0115	TACTGCAGCG	E	2.5	21154	20919	16559	7000	4.84444	0.221728	7.88571	NA	E01_DePCR_45C_MT_E_3_.fastq
PRJNA513137	E1-45-4	SAMN10696842	E1	E01	DePCR	MT	45C	E	4	FLD0116	TACACAGTAG	E	2.5	15133	14973	12007	7000	4.82593	0.212935	7.65714	NA	E01_DePCR_45C_MT_E_4_.fastq
PRJNA513137	E1-45-5	SAMN10696843	E1	E01	DePCR	MT	45C	E	5	FLD0117	CACATACAGT	E	2.5	14755	14584	11636	7000	5.17017	0.192498	8.82857	NA	E01_DePCR_45C_MT_E_5_.fastq
PRJNA513137	E1-45-6	SAMN10696844	E1	E01	DePCR	MT	45C	E	6	FLD0118	CACAGTGATG	E	2.5	24694	24445	19869	7000	4.73695	0.208504	7.8	NA	E01_DePCR_45C_MT_E_6_.fastq
PRJNA513137	E1-45-7	SAMN10696845	E1	E01	DePCR	MT	45C	E	7	FLD0119	CGAGCTAGCA	E	2.5	21029	20810	16711	7000	5.1294	0.197789	6.4	NA	E01_DePCR_45C_MT_E_7_.fastq
PRJNA513137	E1-45-8	SAMN10696846	E1	E01	DePCR	MT	45C	E	8	FLD0120	GAGACTATGC	E	2.5	9461	9213	7390	7000	4.58355	NA	NA	NA	E01_DePCR_45C_MT_E_8_.fastq
PRJNA513137	E1-55-1	SAMN10696847	E1	E01	DePCR	MT	55C	E	1	FLD0305	GGCATCATGC	E	2.5	34679	34280	26860	7000	4.69854	0.176301	8.14286	NA	E01_DePCR_55C_MT_E_1_.fastq
PRJNA513137	E1-55-2	SAMN10696848	E1	E01	DePCR	MT	55C	E	2	FLD0306	GTATAACGCT	E	2.5	43759	43317	35609	7000	4.40274	0.178672	9.08571	NA	E01_DePCR_55C_MT_E_2_.fastq
PRJNA513137	E1-55-3	SAMN10696849	E1	E01	DePCR	MT	55C	E	3	FLD0307	GCAGATAAGT	E	2.5	51624	51058	41729	7000	4.60231	0.195947	7.02857	NA	E01_DePCR_55C_MT_E_3_.fastq
PRJNA513137	E1-55-4	SAMN10696850	E1	E01	DePCR	MT	55C	E	4	FLD0308	GTCGGCTCTA	E	2.5	32441	32088	25959	7000	4.81219	0.183996	6.97143	NA	E01_DePCR_55C_MT_E_4_.fastq
PRJNA513137	E1-55-5	SAMN10696851	E1	E01	DePCR	MT	55C	E	5	FLD0309	TTCGATAGCA	E	2.5	41458	41067	33124	7000	5.00682	0.206693	6.08571	NA	E01_DePCR_55C_MT_E_5_.fastq
PRJNA513137	E1-55-6	SAMN10696852	E1	E01	DePCR	MT	55C	E	6	FLD0310	GTCTAGCAGG	E	2.5	43875	43356	34807	7000	4.72497	0.200596	8.6	NA	E01_DePCR_55C_MT_E_6_.fastq
PRJNA513137	E1-55-7	SAMN10696853	E1	E01	DePCR	MT	55C	E	7	FLD0311	GGAACACAGG	E	2.5	44915	44436	36034	7000	4.66538	0.176805	6.9619	NA	E01_DePCR_55C_MT_E_7_.fastq
PRJNA513137	E1-55-8	SAMN10696854	E1	E01	DePCR	MT	55C	E	8	FLD0312	TGGTTCGCTG	E	2.5	27323	27005	21769	7000	4.91751	0.209251	6.85714	NA	E01_DePCR_55C_MT_E_8_.fastq
PRJNA513137	E1S-45-1	SAMN10697095	E1	E01	TAS	MT	45C	E	1	FLD0265	TCGAATGTGC	E	2.5	26996	26830	23882	7000	6.49367	0.0513935	20.8952	NA	E01_TAS_45C_MT_E_1_.fastq
PRJNA513137	E1S-45-2	SAMN10697096	E1	E01	TAS	MT	45C	E	2	FLD0266	TCGCTGAACA	E	2.5	27815	27685	24954	7000	6.56961	0.057373	20.0667	NA	E01_TAS_45C_MT_E_2_.fastq
PRJNA513137	E1S-45-3	SAMN10697097	E1	E01	TAS	MT	45C	E	3	FLD0267	GCGTTATTGC	E	2.5	30288	30132	26985	7000	6.86045	0.0657379	20.3238	NA	E01_TAS_45C_MT_E_3_.fastq
PRJNA513137	E1S-45-4	SAMN10697098	E1	E01	TAS	MT	45C	E	4	FLD0268	GAACTATCAC	E	2.5	28376	28269	25602	7000	7.0027	0.0627683	18.981	NA	E01_TAS_45C_MT_E_4_.fastq
PRJNA513137	E1S-45-5	SAMN10697099	E1	E01	TAS	MT	45C	E	5	FLD0269	TCGAGGTACT	E	2.5	30608	30478	27475	7000	6.78253	0.0594509	20.0667	NA	E01_TAS_45C_MT_E_5_.fastq
PRJNA513137	E1S-45-6	SAMN10697100	E1	E01	TAS	MT	45C	E	6	FLD0270	TGCGGATGGT	E	2.5	28866	28702	25789	7000	6.75299	0.0569197	22.5524	NA	E01_TAS_45C_MT_E_6_.fastq
PRJNA513137	E1S-45-7	SAMN10697101	E1	E01	TAS	MT	45C	E	7	FLD0271	TTCGAGCTAT	E	2.5	24171	24063	21674	7000	7.01494	0.0582593	19.6095	NA	E01_TAS_45C_MT_E_7_.fastq
PRJNA513137	E1S-45-8	SAMN10697102	E1	E01	TAS	MT	45C	E	8	FLD0272	GGTCTGGTGT	E	2.5	25606	25469	22985	7000	6.69978	0.076415	19.7238	NA	E01_TAS_45C_MT_E_8_.fastq
PRJNA513137	E1S-55-1	SAMN10697103	E1	E01	TAS	MT	55C	E	1	FLD0361	TGGCTACGCT	E	2.5	23840	23758	21124	7000	6.99276	0.0621264	20.1524	NA	E01_TAS_55C_MT_E_1_.fastq
PRJNA513137	E1S-55-2	SAMN10697104	E1	E01	TAS	MT	55C	E	2	FLD0362	ACGCGGACTA	E	2.5	33675	33455	29973	7000	7.03189	0.0887113	20.8952	NA	E01_TAS_55C_MT_E_2_.fastq
PRJNA513137	E1S-55-3	SAMN10697105	E1	E01	TAS	MT	55C	E	3	FLD0363	AGAGGTCGGA	E	2.5	28128	27990	24862	7000	6.96996	0.065218	20.8667	NA	E01_TAS_55C_MT_E_3_.fastq
PRJNA513137	E1S-55-4	SAMN10697106	E1	E01	TAS	MT	55C	E	4	FLD0364	AATCGAGCGT	E	2.5	29128	28969	25990	7000	6.55221	0.0707595	20.1429	NA	E01_TAS_55C_MT_E_4_.fastq
PRJNA513137	E1S-55-5	SAMN10697107	E1	E01	TAS	MT	55C	E	5	FLD0365	AAGTACACTC	E	2.5	27961	27830	25169	7000	6.80066	0.0698882	20.2095	NA	E01_TAS_55C_MT_E_5_.fastq
PRJNA513137	E1S-55-6	SAMN10697108	E1	E01	TAS	MT	55C	E	6	FLD0366	AGCTGAATGA	E	2.5	28106	27970	25141	7000	6.60726	0.066455	21.2095	NA	E01_TAS_55C_MT_E_6_.fastq
PRJNA513137	E1S-55-7	SAMN10697109	E1	E01	TAS	MT	55C	E	7	FLD0367	ATGCCTATCA	E	2.5	26632	26486	23883	7000	6.79002	0.048847	21.581	NA	E01_TAS_55C_MT_E_7_.fastq
PRJNA513137	E1S-55-8	SAMN10697110	E1	E01	TAS	MT	55C	E	8	FLD0368	ACTGTAGGAC	E	2.5	29200	29045	26132	7000	7.04095	0.0670028	21.2095	NA	E01_TAS_55C_MT_E_8_.fastq
PRJNA513137	E2-45-1	SAMN10696855	E2	E10	DePCR	MT	45C	E	1	FLD0121	CAGAGCTAGT	E	2.5	13078	12947	10236	7000	3.18803	2.1936	6.82857	44.9796	E10_DePCR_45C_MT_E_1_.fastq
PRJNA513137	E2-45-2	SAMN10696856	E2	E10	DePCR	MT	45C	E	2	FLD0122	CGCAGAGCAT	E	2.5	15626	15467	11986	7000	3.05626	2.17267	4.69524	47.3232	E10_DePCR_45C_MT_E_2_.fastq
PRJNA513137	E2-45-3	SAMN10696857	E2	E10	DePCR	MT	45C	E	3	FLD0123	TGTACAGCGA	E	2.5	24247	24007	18837	7000	3.17946	2.18333	6	45.2681	E10_DePCR_45C_MT_E_3_.fastq
PRJNA513137	E2-45-4	SAMN10696858	E2	E10	DePCR	MT	45C	E	4	FLD0124	ACGTCAGTAT	E	2.5	50452	49850	39461	7000	2.79756	2.1347	7.28571	54.0076	E10_DePCR_45C_MT_E_4_.fastq
PRJNA513137	E2-45-5	SAMN10696859	E2	E10	DePCR	MT	45C	E	5	FLD0125	TCACAGCATA	E	2.5	20356	20156	15962	7000	3.15402	2.18135	6.17143	46.1287	E10_DePCR_45C_MT_E_5_.fastq
PRJNA513137	E2-45-6	SAMN10696860	E2	E10	DePCR	MT	45C	E	6	FLD0126	ACTGCGTGTC	E	2.5	46462	45967	35953	7000	2.71261	2.12651	5.62857	52.6092	E10_DePCR_45C_MT_E_6_.fastq
PRJNA513137	E2-45-7	SAMN10696861	E2	E10	DePCR	MT	45C	E	7	FLD0127	CGATCGACTG	E	2.5	7750	7674	6031	7000	3.02817	NA	NA	53.2867	E10_DePCR_45C_MT_E_7_.fastq
PRJNA513137	E2-45-8	SAMN10696862	E2	E10	DePCR	MT	45C	E	8	FLD0128	GCGAGATGTA	E	2.5	18152	17778	13425	7000	2.66631	2.11394	5.05714	50.6087	E10_DePCR_45C_MT_E_8_.fastq
PRJNA513137	E2-55-1	SAMN10696863	E2	E10	DePCR	MT	55C	E	1	FLD0313	CACATTAGCG	E	2.5	9997	9192	6594	7000	1.71771	NA	NA	84.4263	E10_DePCR_55C_MT_E_1_.fastq
PRJNA513137	E2-55-2	SAMN10696864	E2	E10	DePCR	MT	55C	E	2	FLD0314	GAAGCGCACT	E	2.5	17048	16423	12629	7000	1.62632	1.7301	4.05714	84.6149	E10_DePCR_55C_MT_E_2_.fastq
PRJNA513137	E2-55-3	SAMN10696865	E2	E10	DePCR	MT	55C	E	3	FLD0315	GCATGCCAGT	E	2.5	47195	46724	37162	7000	1.61343	1.71337	5.31429	90.0662	E10_DePCR_55C_MT_E_3_.fastq
PRJNA513137	E2-55-4	SAMN10696866	E2	E10	DePCR	MT	55C	E	4	FLD0316	GGAGACTGTA	E	2.5	46247	45852	36673	7000	1.6017	1.70465	4.13333	88.6302	E10_DePCR_55C_MT_E_4_.fastq
PRJNA513137	E2-55-5	SAMN10696867	E2	E10	DePCR	MT	55C	E	5	FLD0317	TCGAACTGCA	E	2.5	30684	30402	24288	7000	1.60495	1.69294	2.44762	91.8965	E10_DePCR_55C_MT_E_5_.fastq
PRJNA513137	E2-55-6	SAMN10696868	E2	E10	DePCR	MT	55C	E	6	FLD0318	GAGAGGACAT	E	2.5	39796	39445	31219	7000	1.63482	1.68923	3	90.3483	E10_DePCR_55C_MT_E_6_.fastq
PRJNA513137	E2-55-7	SAMN10696869	E2	E10	DePCR	MT	55C	E	7	FLD0319	GAGCACGGAA	E	2.5	35375	35047	27550	7000	1.60157	1.68378	3.05714	88.7671	E10_DePCR_55C_MT_E_7_.fastq
PRJNA513137	E2-55-8	SAMN10696870	E2	E10	DePCR	MT	55C	E	8	FLD0320	GCTCTAACAT	E	2.5	43691	43195	34776	7000	1.58411	1.68467	5.11429	88.7309	E10_DePCR_55C_MT_E_8_.fastq
PRJNA513137	E2S-45-1	SAMN10697111	E2	E10	TAS	MT	45C	E	1	FLD0273	CTAAGTCATG	E	2.5	24418	24278	21624	7000	7.13537	2.33612	21.5429	19.5594	E10_TAS_45C_MT_E_1_.fastq
PRJNA513137	E2S-45-2	SAMN10697112	E2	E10	TAS	MT	45C	E	2	FLD0274	TTGCAGATCA	E	2.5	25648	25505	22880	7000	6.65915	2.32601	22.1143	21.7733	E10_TAS_45C_MT_E_2_.fastq
PRJNA513137	E2S-45-3	SAMN10697113	E2	E10	TAS	MT	45C	E	3	FLD0275	CTGCGAATGT	E	2.5	27482	27324	24389	7000	7.48718	2.3283	21.8571	21.0355	E10_TAS_45C_MT_E_3_.fastq
PRJNA513137	E2S-45-4	SAMN10697114	E2	E10	TAS	MT	45C	E	4	FLD0276	CTGTTCTAGC	E	2.5	21522	21398	18919	7000	7.02882	2.32774	21.6857	18.6081	E10_TAS_45C_MT_E_4_.fastq
PRJNA513137	E2S-45-5	SAMN10697115	E2	E10	TAS	MT	45C	E	5	FLD0277	CACTTGTGTG	E	2.5	24946	24834	22080	7000	7.02658	2.33548	23.1143	19.9109	E10_TAS_45C_MT_E_5_.fastq
PRJNA513137	E2S-45-6	SAMN10697116	E2	E10	TAS	MT	45C	E	6	FLD0278	TGGATGACAT	E	2.5	28964	28839	25810	7000	6.91854	2.33084	21.7714	20.9229	E10_TAS_45C_MT_E_6_.fastq
PRJNA513137	E2S-45-7	SAMN10697117	E2	E10	TAS	MT	45C	E	7	FLD0279	GATCCTGAGC	E	2.5	25218	25107	22117	7000	7.29194	2.3202	21.5714	21.2209	E10_TAS_45C_MT_E_7_.fastq
PRJNA513137	E2S-45-8	SAMN10697118	E2	E10	TAS	MT	45C	E	8	FLD0280	GTCGGTCTGA	E	2.5	27437	27297	24399	7000	6.98991	2.32633	19.6	20.8211	E10_TAS_45C_MT_E_8_.fastq
PRJNA513137	E2S-55-1	SAMN10697119	E2	E10	TAS	MT	55C	E	1	FLD0369	ATAGCCGTGT	E	2.5	24368	24235	21449	7000	5.94536	2.33209	21.7714	23.9061	E10_TAS_55C_MT_E_1_.fastq
PRJNA513137	E2S-55-2	SAMN10697120	E2	E10	TAS	MT	55C	E	2	FLD0370	TCACGACGAA	E	2.5	23957	23826	21072	7000	6.04867	2.32812	21.3143	22.9253	E10_TAS_55C_MT_E_2_.fastq
PRJNA513137	E2S-55-3	SAMN10697121	E2	E10	TAS	MT	55C	E	3	FLD0371	ATCTGTCCAT	E	2.5	25882	25764	22984	7000	6.45106	2.32653	24	20.9709	E10_TAS_55C_MT_E_3_.fastq
PRJNA513137	E2S-55-4	SAMN10697122	E2	E10	TAS	MT	55C	E	4	FLD0372	ACTTAGAGAG	E	2.5	28828	28656	25681	7000	6.30827	2.32748	20.8571	21.4609	E10_TAS_55C_MT_E_4_.fastq
PRJNA513137	E2S-55-5	SAMN10697123	E2	E10	TAS	MT	55C	E	5	FLD0373	AGTGGCAGGT	E	2.5	30349	30189	26729	7000	6.21509	2.31491	21.0286	21.7476	E10_TAS_55C_MT_E_5_.fastq
PRJNA513137	E2S-55-6	SAMN10697124	E2	E10	TAS	MT	55C	E	6	FLD0374	ATGAGGTCGT	E	2.5	28277	28126	25067	7000	6.07887	2.31683	20.8	21.9592	E10_TAS_55C_MT_E_6_.fastq
PRJNA513137	E2S-55-7	SAMN10697125	E2	E10	TAS	MT	55C	E	7	FLD0375	AGGAGAAGGA	E	2.5	29573	29425	26299	7000	6.05323	2.31725	19.5429	21.4973	E10_TAS_55C_MT_E_7_.fastq
PRJNA513137	E2S-55-8	SAMN10697126	E2	E10	TAS	MT	55C	E	8	FLD0376	ACAACTGCAA	E	2.5	26922	26763	23625	7000	6.13451	2.34805	21.4571	22.0716	E10_TAS_55C_MT_E_8_.fastq
PRJNA1072695	DT-DePCR-45-01	SAMN39749629	A1	A01	DePCR	DT	45C	A	1	FLD0001	GTATCGTCGT	A	2.5	36912	36659	31124	none	31124	NA	NA	NA	DT-DePCR-45-01_S118_L001_R1_001.fastq.gz
PRJNA1072695	DT-DePCR-45-02	SAMN39749630	A1	A01	DePCR	DT	45C	A	2	FLD0002	GTGTATGCGT	A	2.5	33390	33128	28213	none	28213	NA	NA	NA	DT-DePCR-45-02_S119_L001_R1_001.fastq.gz
PRJNA1072695	DT-DePCR-45-03	SAMN39749631	A1	A01	DePCR	DT	45C	A	3	FLD0003	TGCTCGTAGT	A	2.5	36567	36252	30969	none	30969	NA	NA	NA	DT-DePCR-45-03_S120_L001_R1_001.fastq.gz
PRJNA1072695	DT-DePCR-45-04	SAMN39749632	A1	A01	DePCR	DT	45C	A	4	FLD0004	GTCGTCGTCT	A	2.5	33817	33566	28437	none	28437	NA	NA	NA	DT-DePCR-45-04_S121_L001_R1_001.fastq.gz
PRJNA1072695	DT-DePCR-45-05	SAMN39749633	A1	A01	DePCR	DT	45C	A	5	FLD0005	GTGCGTGTGT	A	2.5	33155	32891	28069	none	28069	NA	NA	NA	DT-DePCR-45-05_S122_L001_R1_001.fastq.gz
PRJNA1072695	DT-DePCR-45-06	SAMN39749634	A1	A01	DePCR	DT	45C	A	6	FLD0006	GCGTCGTGTA	A	2.5	29480	29224	24952	none	24952	NA	NA	NA	DT-DePCR-45-06_S123_L001_R1_001.fastq.gz
PRJNA1072695	DT-DePCR-45-07	SAMN39749635	A1	A01	DePCR	DT	45C	A	7	FLD0007	GTCGTGTACT	A	2.5	30357	30133	25537	none	25537	NA	NA	NA	DT-DePCR-45-07_S124_L001_R1_001.fastq.gz
PRJNA1072695	DT-DePCR-45-08	SAMN39749636	A1	A01	DePCR	DT	45C	A	8	FLD0008	GATGTAGCGT	A	2.5	15340	15201	12762	none	12762	NA	NA	NA	DT-DePCR-45-08_S125_L001_R1_001.fastq.gz
PRJNA1072695	DT-DePCR-55-01	SAMN39749637	A1	A01	DePCR	DT	55C	A	1	FLD0009	GAGTGATCGT	A	2.5	35951	35687	30011	none	30011	NA	NA	NA	DT-DePCR-55-01_S126_L001_R1_001.fastq.gz
PRJNA1072695	DT-DePCR-55-02	SAMN39749638	A1	A01	DePCR	DT	55C	A	2	FLD0010	CGCTATCAGT	A	2.5	41397	41085	34765	none	34765	NA	NA	NA	DT-DePCR-55-02_S127_L001_R1_001.fastq.gz
PRJNA1072695	DT-DePCR-55-03	SAMN39749639	A1	A01	DePCR	DT	55C	A	3	FLD0011	CGCTGTAGTC	A	2.5	40745	40457	34419	none	34419	NA	NA	NA	DT-DePCR-55-03_S128_L001_R1_001.fastq.gz
PRJNA1072695	DT-DePCR-55-04	SAMN39749640	A1	A01	DePCR	DT	55C	A	4	FLD0012	GCTAGTGAGT	A	2.5	36329	36100	30376	none	30376	NA	NA	NA	DT-DePCR-55-04_S129_L001_R1_001.fastq.gz
PRJNA1072695	DT-DePCR-55-05	SAMN39749641	A1	A01	DePCR	DT	55C	A	5	FLD0013	GAGCTAGTGA	A	2.5	42804	42444	35844	none	35844	NA	NA	NA	DT-DePCR-55-05_S130_L001_R1_001.fastq.gz
PRJNA1072695	DT-DePCR-55-06	SAMN39749642	A1	A01	DePCR	DT	55C	A	6	FLD0014	CGTGCTGTCA	A	2.5	33278	33051	27963	none	27963	NA	NA	NA	DT-DePCR-55-06_S131_L001_R1_001.fastq.gz
PRJNA1072695	DT-DePCR-55-07	SAMN39749643	A1	A01	DePCR	DT	55C	A	7	FLD0015	GATCGTCTCT	A	2.5	49651	49342	41858	none	41858	NA	NA	NA	DT-DePCR-55-07_S132_L001_R1_001.fastq.gz
PRJNA1072695	DT-DePCR-55-08	SAMN39749644	A1	A01	DePCR	DT	55C	A	8	FLD0016	GTGCTGTCGT	A	2.5	40744	40447	34186	none	34186	NA	NA	NA	DT-DePCR-55-08_S133_L001_R1_001.fastq.gz
PRJNA1072695	DT-PCR-45-01	SAMN39749645	A1	A01	PCR	DT	45C	A	1	FLD0193	TTGTTGCTGT	A	2.5	37311	37227	34670	none	34670	NA	NA	NA	DT-PCR-45-01_S58_L001_R1_001.fastq.gz
PRJNA1072695	DT-PCR-45-02	SAMN39749646	A1	A01	PCR	DT	45C	A	2	FLD0194	GTGTGGTTGT	A	2.5	41428	41352	38656	none	38656	NA	NA	NA	DT-PCR-45-02_S59_L001_R1_001.fastq.gz
PRJNA1072695	DT-PCR-45-03	SAMN39749647	A1	A01	PCR	DT	45C	A	3	FLD0195	TAGGTGGAAT	A	2.5	37367	37292	34859	none	34859	NA	NA	NA	DT-PCR-45-03_S60_L001_R1_001.fastq.gz
PRJNA1072695	DT-PCR-45-04	SAMN39749648	A1	A01	PCR	DT	45C	A	4	FLD0196	TGTAGGTGGA	A	2.5	39393	39291	36692	none	36692	NA	NA	NA	DT-PCR-45-04_S61_L001_R1_001.fastq.gz
PRJNA1072695	DT-PCR-45-05	SAMN39749649	A1	A01	PCR	DT	45C	A	5	FLD0197	TTAGTGGTGA	A	2.5	38119	38037	35621	none	35621	NA	NA	NA	DT-PCR-45-05_S62_L001_R1_001.fastq.gz
PRJNA1072695	DT-PCR-45-06	SAMN39749650	A1	A01	PCR	DT	45C	A	6	FLD0198	GTGAAGGTAA	A	2.5	34054	33975	31745	none	31745	NA	NA	NA	DT-PCR-45-06_S63_L001_R1_001.fastq.gz
PRJNA1072695	DT-PCR-45-07	SAMN39749651	A1	A01	PCR	DT	45C	A	7	FLD0199	TGTTGTGGTA	A	2.5	34455	34388	32066	none	32066	NA	NA	NA	DT-PCR-45-07_S64_L001_R1_001.fastq.gz
PRJNA1072695	DT-PCR-45-08	SAMN39749652	A1	A01	PCR	DT	45C	A	8	FLD0200	GTTGATGAGT	A	2.5	35883	35804	33278	none	33278	NA	NA	NA	DT-PCR-45-08_S65_L001_R1_001.fastq.gz
PRJNA1072695	DT-PCR-55-01	SAMN39749653	A1	A01	PCR	DT	55C	A	1	FLD0201	GGTCAGTGTA	A	2.5	40051	39992	37331	none	37331	NA	NA	NA	DT-PCR-55-01_S66_L001_R1_001.fastq.gz
PRJNA1072695	DT-PCR-55-02	SAMN39749654	A1	A01	PCR	DT	55C	A	2	FLD0202	GTAATGGAGT	A	2.5	35247	35151	32764	none	32764	NA	NA	NA	DT-PCR-55-02_S67_L001_R1_001.fastq.gz
PRJNA1072695	DT-PCR-55-03	SAMN39749655	A1	A01	PCR	DT	55C	A	3	FLD0203	CTCGTTATTC	A	2.5	35098	34986	32553	none	32553	NA	NA	NA	DT-PCR-55-03_S68_L001_R1_001.fastq.gz
PRJNA1072695	DT-PCR-55-04	SAMN39749656	A1	A01	PCR	DT	55C	A	4	FLD0204	GGAAGTAAGG	A	2.5	35569	35485	33088	none	33088	NA	NA	NA	DT-PCR-55-04_S69_L001_R1_001.fastq.gz
PRJNA1072695	DT-PCR-55-05	SAMN39749657	A1	A01	PCR	DT	55C	A	5	FLD0205	CGGTGTGTGT	A	2.5	34242	34171	31797	none	31797	NA	NA	NA	DT-PCR-55-05_S70_L001_R1_001.fastq.gz
PRJNA1072695	DT-PCR-55-06	SAMN39749658	A1	A01	PCR	DT	55C	A	6	FLD0206	CGTCTTCTTA	A	2.5	30517	30438	28319	none	28319	NA	NA	NA	DT-PCR-55-06_S71_L001_R1_001.fastq.gz
PRJNA1072695	DT-PCR-55-07	SAMN39749659	A1	A01	PCR	DT	55C	A	7	FLD0207	TGTGAATCTC	A	2.5	24910	24861	23157	none	23157	NA	NA	NA	DT-PCR-55-07_S72_L001_R1_001.fastq.gz
PRJNA1072695	DT-PCR-55-08	SAMN39749660	A1	A01	PCR	DT	55C	A	8	FLD0208	CTAATCGTGT	A	2.5	27326	27268	25335	none	25335	NA	NA	NA	DT-PCR-55-08_S73_L001_R1_001.fastq.gz
PRJNA1072695	QB-DePCR-45-01	SAMN39749661	A1	A01	DePCR	QB	45C	A	1	FLD0017	TGAGCGTGCT	A	2.5	20782	20651	18846	none	18846	NA	NA	NA	QB-DePCR-45-01_S134_L001_R1_001.fastq.gz
PRJNA1072695	QB-DePCR-45-02	SAMN39749662	A1	A01	DePCR	QB	45C	A	2	FLD0018	CATGTCGTCA	A	2.5	18128	18030	16433	none	16433	NA	NA	NA	QB-DePCR-45-02_S135_L001_R1_001.fastq.gz
PRJNA1072695	QB-DePCR-45-03	SAMN39749663	A1	A01	DePCR	QB	45C	A	3	FLD0019	TCAGTGTCTC	A	2.5	8005	7948	7119	none	7119	NA	NA	NA	QB-DePCR-45-03_S136_L001_R1_001.fastq.gz
PRJNA1072695	QB-DePCR-45-04	SAMN39749664	A1	A01	DePCR	QB	45C	A	4	FLD0020	GTGCTCATGT	A	2.5	17922	17830	16290	none	16290	NA	NA	NA	QB-DePCR-45-04_S137_L001_R1_001.fastq.gz
PRJNA1072695	QB-DePCR-45-05	SAMN39749665	A1	A01	DePCR	QB	45C	A	5	FLD0021	CGTATCTCGA	A	2.5	19518	19397	17809	none	17809	NA	NA	NA	QB-DePCR-45-05_S138_L001_R1_001.fastq.gz
PRJNA1072695	QB-DePCR-45-06	SAMN39749666	A1	A01	DePCR	QB	45C	A	6	FLD0022	GTCATGCGTC	A	2.5	16469	16369	14852	none	14852	NA	NA	NA	QB-DePCR-45-06_S139_L001_R1_001.fastq.gz
PRJNA1072695	QB-DePCR-45-07	SAMN39749667	A1	A01	DePCR	QB	45C	A	7	FLD0023	CTATGCGATC	A	2.5	16896	16791	15271	none	15271	NA	NA	NA	QB-DePCR-45-07_S140_L001_R1_001.fastq.gz
PRJNA1072695	QB-DePCR-45-08	SAMN39749668	A1	A01	DePCR	QB	45C	A	8	FLD0024	TGCTATGCTG	A	2.5	8032	7970	7126	none	7126	NA	NA	NA	QB-DePCR-45-08_S141_L001_R1_001.fastq.gz
PRJNA1072695	QB-DePCR-55-01	SAMN39749669	A1	A01	DePCR	QB	55C	A	1	FLD0025	TGTGTGCATG	A	2.5	44837	44570	41411	none	41411	NA	NA	NA	QB-DePCR-55-01_S142_L001_R1_001.fastq.gz
PRJNA1072695	QB-DePCR-55-02	SAMN39749670	A1	A01	DePCR	QB	55C	A	2	FLD0026	GAGTGTCACT	A	2.5	46553	46303	43018	none	43018	NA	NA	NA	QB-DePCR-55-02_S143_L001_R1_001.fastq.gz
PRJNA1072695	QB-DePCR-55-03	SAMN39749671	A1	A01	DePCR	QB	55C	A	3	FLD0027	CTAGTCTCGT	A	2.5	47165	46877	43586	none	43586	NA	NA	NA	QB-DePCR-55-03_S144_L001_R1_001.fastq.gz
PRJNA1072695	QB-DePCR-55-04	SAMN39749672	A1	A01	DePCR	QB	55C	A	4	FLD0028	GAGTGCATCT	A	2.5	46978	46719	43451	none	43451	NA	NA	NA	QB-DePCR-55-04_S145_L001_R1_001.fastq.gz
PRJNA1072695	QB-DePCR-55-05	SAMN39749673	A1	A01	DePCR	QB	55C	A	5	FLD0029	TGCGTAGTCG	A	2.5	44782	44516	41306	none	41306	NA	NA	NA	QB-DePCR-55-05_S146_L001_R1_001.fastq.gz
PRJNA1072695	QB-DePCR-55-06	SAMN39749674	A1	A01	DePCR	QB	55C	A	6	FLD0030	CTGTGTCGTC	A	2.5	46480	46175	42928	none	42928	NA	NA	NA	QB-DePCR-55-06_S147_L001_R1_001.fastq.gz
PRJNA1072695	QB-DePCR-55-07	SAMN39749675	A1	A01	DePCR	QB	55C	A	7	FLD0031	CTGTAGTGCG	A	2.5	38200	37969	35245	none	35245	NA	NA	NA	QB-DePCR-55-07_S148_L001_R1_001.fastq.gz
PRJNA1072695	QB-DePCR-55-08	SAMN39749676	A1	A01	DePCR	QB	55C	A	8	FLD0032	GTGCGCTAGT	A	2.5	44519	44265	41049	none	41049	NA	NA	NA	QB-DePCR-55-08_S149_L001_R1_001.fastq.gz
PRJNA1072695	QB-PCR-45-01	SAMN39749677	A1	A01	PCR	QB	45C	A	1	FLD0209	CTCTTAGTTC	A	2.5	57156	57056	55411	none	55411	NA	NA	NA	QB-PCR-45-01_S74_L001_R1_001.fastq.gz
PRJNA1072695	QB-PCR-45-02	SAMN39749678	A1	A01	PCR	QB	45C	A	2	FLD0210	GGATAGGATC	A	2.5	46071	45953	44537	none	44537	NA	NA	NA	QB-PCR-45-02_S75_L001_R1_001.fastq.gz
PRJNA1072695	QB-PCR-45-03	SAMN39749679	A1	A01	PCR	QB	45C	A	3	FLD0211	GGTGTCTTGT	A	2.5	64155	63980	62203	none	62203	NA	NA	NA	QB-PCR-45-03_S76_L001_R1_001.fastq.gz
PRJNA1072695	QB-PCR-45-04	SAMN39749680	A1	A01	PCR	QB	45C	A	4	FLD0212	GATGGTTGTA	A	2.5	54073	53971	52354	none	52354	NA	NA	NA	QB-PCR-45-04_S77_L001_R1_001.fastq.gz
PRJNA1072695	QB-PCR-45-05	SAMN39749681	A1	A01	PCR	QB	45C	A	5	FLD0213	CCTCGTTGTT	A	2.5	43895	43746	42358	none	42358	NA	NA	NA	QB-PCR-45-05_S78_L001_R1_001.fastq.gz
PRJNA1072695	QB-PCR-45-06	SAMN39749682	A1	A01	PCR	QB	45C	A	6	FLD0214	GGTTGGAGTT	A	2.5	36587	36505	35282	none	35282	NA	NA	NA	QB-PCR-45-06_S79_L001_R1_001.fastq.gz
PRJNA1072695	QB-PCR-45-07	SAMN39749683	A1	A01	PCR	QB	45C	A	7	FLD0215	TGGTGTCCGT	A	2.5	36108	35997	34906	none	34906	NA	NA	NA	QB-PCR-45-07_S80_L001_R1_001.fastq.gz
PRJNA1072695	QB-PCR-45-08	SAMN39749684	A1	A01	PCR	QB	45C	A	8	FLD0216	CGTTAGCGTA	A	2.5	11950	11908	11376	none	11376	NA	NA	NA	QB-PCR-45-08_S81_L001_R1_001.fastq.gz
PRJNA1072695	QB-PCR-55-01	SAMN39749685	A1	A01	PCR	QB	55C	A	1	FLD0217	TACTAGGATC	A	2.5	51928	51802	50369	none	50369	NA	NA	NA	QB-PCR-55-01_S82_L001_R1_001.fastq.gz
PRJNA1072695	QB-PCR-55-02	SAMN39749686	A1	A01	PCR	QB	55C	A	2	FLD0218	GTCTCAATGT	A	2.5	53566	53473	51928	none	51928	NA	NA	NA	QB-PCR-55-02_S83_L001_R1_001.fastq.gz
PRJNA1072695	QB-PCR-55-03	SAMN39749687	A1	A01	PCR	QB	55C	A	3	FLD0219	GATGAGGTAT	A	2.5	54463	54325	52779	none	52779	NA	NA	NA	QB-PCR-55-03_S84_L001_R1_001.fastq.gz
PRJNA1072695	QB-PCR-55-04	SAMN39749688	A1	A01	PCR	QB	55C	A	4	FLD0220	GGTGTTAGTG	A	2.5	64397	64268	62422	none	62422	NA	NA	NA	QB-PCR-55-04_S85_L001_R1_001.fastq.gz
PRJNA1072695	QB-PCR-55-05	SAMN39749689	A1	A01	PCR	QB	55C	A	5	FLD0221	CATTCTCTGA	A	2.5	66848	66712	64761	none	64761	NA	NA	NA	QB-PCR-55-05_S86_L001_R1_001.fastq.gz
PRJNA1072695	QB-PCR-55-06	SAMN39749690	A1	A01	PCR	QB	55C	A	6	FLD0222	CATCTGGAGT	A	2.5	49213	49084	47707	none	47707	NA	NA	NA	QB-PCR-55-06_S87_L001_R1_001.fastq.gz
PRJNA1072695	QB-PCR-55-07	SAMN39749691	A1	A01	PCR	QB	55C	A	7	FLD0223	GAATGGAAGA	A	2.5	54623	54466	52791	none	52791	NA	NA	NA	QB-PCR-55-07_S88_L001_R1_001.fastq.gz
PRJNA1072695	QB-PCR-55-08	SAMN39749692	A1	A01	PCR	QB	55C	A	8	FLD0224	GGCTGTGATC	A	2.5	21	21	19	none	19	NA	NA	NA	QB-PCR-55-08_S89_L001_R1_001.fastq.gz
PRJNA1072695	v1-v0-45C-01	SAMN39749693	v1-v0	VW	DePCR	QB	45C	AP	1	FLD0193	TTGTTGCTGT	A	2.5	2423	2391	2048	none	2048	NA	NA	NA	v1-v0-45C-01_S1_L001_R1_001.fastq.gz
PRJNA1072695	v1-v0-45C-02	SAMN39749694	v1-v0	VW	DePCR	QB	45C	AP	2	FLD0194	GTGTGGTTGT	A	2.5	3401	3342	2328	none	2328	NA	NA	NA	v1-v0-45C-02_S2_L001_R1_001.fastq.gz
PRJNA1072695	v1-v0-45C-03	SAMN39749695	v1-v0	VW	DePCR	QB	45C	AP	3	FLD0195	TAGGTGGAAT	A	2.5	2526	2511	2167	none	2167	NA	NA	NA	v1-v0-45C-03_S3_L001_R1_001.fastq.gz
PRJNA1072695	v1-v0-45C-04	SAMN39749696	v1-v0	VW	DePCR	QB	45C	AP	4	FLD0196	TGTAGGTGGA	A	2.5	2375	2358	2065	none	2065	NA	NA	NA	v1-v0-45C-04_S4_L001_R1_001.fastq.gz
PRJNA1072695	v1-v0-55C-01	SAMN39749697	v1-v0	VW	DePCR	QB	55C	AP	1	FLD0197	TTAGTGGTGA	A	2.5	17798	17689	16500	none	16500	NA	NA	NA	v1-v0-55C-01_S5_L001_R1_001.fastq.gz
PRJNA1072695	v1-v0-55C-02	SAMN39749698	v1-v0	VW	DePCR	QB	55C	AP	2	FLD0198	GTGAAGGTAA	A	2.5	14559	14466	13263	none	13263	NA	NA	NA	v1-v0-55C-02_S6_L001_R1_001.fastq.gz
PRJNA1072695	v1-v0-55C-03	SAMN39749699	v1-v0	VW	DePCR	QB	55C	AP	3	FLD0199	TGTTGTGGTA	A	2.5	18529	18416	17125	none	17125	NA	NA	NA	v1-v0-55C-03_S7_L001_R1_001.fastq.gz
PRJNA1072695	v1-v0-55C-04	SAMN39749700	v1-v0	VW	DePCR	QB	55C	AP	4	FLD0200	GTTGATGAGT	A	2.5	16012	15889	14708	none	14708	NA	NA	NA	v1-v0-55C-04_S8_L001_R1_001.fastq.gz
PRJNA1072695	v1-v11-45C-01	SAMN39749701	v1-v11	V4	DePCR	QB	45C	AP	1	FLD0201	GGTCAGTGTA	A	2.5	2441	2419	2023	none	2023	0.666909	NA	22.807	v1-v11-45C-01_S49_L001_R1_001.fastq.gz
PRJNA1072695	v1-v11-45C-02	SAMN39749702	v1-v11	V4	DePCR	QB	45C	AP	2	FLD0202	GTAATGGAGT	A	2.5	1319	1306	1047	none	1047	0.672542	NA	20.2301	v1-v11-45C-02_S50_L001_R1_001.fastq.gz
PRJNA1072695	v1-v11-45C-03	SAMN39749703	v1-v11	V4	DePCR	QB	45C	AP	3	FLD0203	CTCGTTATTC	A	2.5	1117	1112	865	none	865	0.666738	NA	22.8804	v1-v11-45C-03_S51_L001_R1_001.fastq.gz
PRJNA1072695	v1-v11-45C-04	SAMN39749704	v1-v11	V4	DePCR	QB	45C	AP	4	FLD0204	GGAAGTAAGG	A	2.5	757	752	593	none	593	0.663783	NA	24.1147	v1-v11-45C-04_S52_L001_R1_001.fastq.gz
PRJNA1072695	v1-v11-55C-01	SAMN39749705	v1-v11	V4	DePCR	QB	55C	AP	1	FLD0205	CGGTGTGTGT	A	2.5	13683	13577	12407	none	12407	0.375552	NA	75.125	v1-v11-55C-01_S53_L001_R1_001.fastq.gz
PRJNA1072695	v1-v11-55C-02	SAMN39749706	v1-v11	V4	DePCR	QB	55C	AP	2	FLD0206	CGTCTTCTTA	A	2.5	15194	15068	13860	none	13860	0.36672	NA	76.0206	v1-v11-55C-02_S54_L001_R1_001.fastq.gz
PRJNA1072695	v1-v11-55C-03	SAMN39749707	v1-v11	V4	DePCR	QB	55C	AP	3	FLD0207	TGTGAATCTC	A	2.5	14837	14730	13528	none	13528	0.382676	NA	74.3887	v1-v11-55C-03_S55_L001_R1_001.fastq.gz
PRJNA1072695	v1-v11-55C-04	SAMN39749708	v1-v11	V4	DePCR	QB	55C	AP	4	FLD0208	CTAATCGTGT	A	2.5	12060	11963	10927	none	10927	0.384112	NA	74.2386	v1-v11-55C-04_S56_L001_R1_001.fastq.gz
PRJNA1072695	v1-v1-45C-01	SAMN39749709	v1-v1	V0	DePCR	QB	45C	AP	1	FLD0209	CTCTTAGTTC	A	2.5	1550	1542	1328	none	1328	NA	NA	NA	v1-v1-45C-01_S9_L001_R1_001.fastq.gz
PRJNA1072695	v1-v1-45C-02	SAMN39749710	v1-v1	V0	DePCR	QB	45C	AP	2	FLD0210	GGATAGGATC	A	2.5	1631	1617	1388	none	1388	NA	NA	NA	v1-v1-45C-02_S10_L001_R1_001.fastq.gz
PRJNA1072695	v1-v1-45C-03	SAMN39749711	v1-v1	V0	DePCR	QB	45C	AP	3	FLD0211	GGTGTCTTGT	A	2.5	1372	1359	1153	none	1153	NA	NA	NA	v1-v1-45C-03_S11_L001_R1_001.fastq.gz
PRJNA1072695	v1-v1-45C-04	SAMN39749712	v1-v1	V0	DePCR	QB	45C	AP	4	FLD0212	GATGGTTGTA	A	2.5	1490	1478	1261	none	1261	NA	NA	NA	v1-v1-45C-04_S12_L001_R1_001.fastq.gz
PRJNA1072695	v1-v15-45C-01	SAMN39749713	v1-v15	V6	DePCR	QB	45C	AP	1	FLD0213	CCTCGTTGTT	A	2.5	1220	1210	927	none	927	0.684703	NA	12.9771	v1-v15-45C-01_S57_L001_R1_001.fastq.gz
PRJNA1072695	v1-v15-45C-02	SAMN39749714	v1-v15	V6	DePCR	QB	45C	AP	2	FLD0214	GGTTGGAGTT	A	2.5	2071	2049	1684	none	1684	0.681345	NA	15.3337	v1-v15-45C-02_S58_L001_R1_001.fastq.gz
PRJNA1072695	v1-v15-45C-03	SAMN39749715	v1-v15	V6	DePCR	QB	45C	AP	3	FLD0215	TGGTGTCCGT	A	2.5	1857	1830	1496	none	1496	0.681347	NA	15.3324	v1-v15-45C-03_S59_L001_R1_001.fastq.gz
PRJNA1072695	v1-v15-45C-04	SAMN39749716	v1-v15	V6	DePCR	QB	45C	AP	4	FLD0216	CGTTAGCGTA	A	2.5	1712	1698	1387	none	1387	0.671679	NA	20.6466	v1-v15-45C-04_S60_L001_R1_001.fastq.gz
PRJNA1072695	v1-v15-55C-01	SAMN39749717	v1-v15	V6	DePCR	QB	55C	AP	1	FLD0217	TACTAGGATC	A	2.5	12648	12552	11457	none	11457	0.463678	NA	65.0062	v1-v15-55C-01_S61_L001_R1_001.fastq.gz
PRJNA1072695	v1-v15-55C-02	SAMN39749718	v1-v15	V6	DePCR	QB	55C	AP	2	FLD0218	GTCTCAATGT	A	2.5	13369	13269	12102	none	12102	0.462014	NA	65.2203	v1-v15-55C-02_S62_L001_R1_001.fastq.gz
PRJNA1072695	v1-v15-55C-03	SAMN39749719	v1-v15	V6	DePCR	QB	55C	AP	3	FLD0219	GATGAGGTAT	A	2.5	12628	12521	11446	none	11446	0.457383	NA	65.8108	v1-v15-55C-03_S63_L001_R1_001.fastq.gz
PRJNA1072695	v1-v15-55C-04	SAMN39749720	v1-v15	V6	DePCR	QB	55C	AP	4	FLD0220	GGTGTTAGTG	A	2.5	12511	12417	11297	none	11297	0.458314	NA	65.6927	v1-v15-55C-04_S64_L001_R1_001.fastq.gz
PRJNA1072695	v1-v1-55C-01	SAMN39749721	v1-v1	V0	DePCR	QB	55C	AP	1	FLD0221	CATTCTCTGA	A	2.5	12132	12003	11003	none	11003	NA	NA	NA	v1-v1-55C-01_S13_L001_R1_001.fastq.gz
PRJNA1072695	v1-v1-55C-02	SAMN39749722	v1-v1	V0	DePCR	QB	55C	AP	2	FLD0222	CATCTGGAGT	A	2.5	12002	11928	11022	none	11022	NA	NA	NA	v1-v1-55C-02_S14_L001_R1_001.fastq.gz
PRJNA1072695	v1-v1-55C-03	SAMN39749723	v1-v1	V0	DePCR	QB	55C	AP	3	FLD0223	GAATGGAAGA	A	2.5	13817	13726	12752	none	12752	NA	NA	NA	v1-v1-55C-03_S15_L001_R1_001.fastq.gz
PRJNA1072695	v1-v1-55C-04	SAMN39749724	v1-v1	V0	DePCR	QB	55C	AP	4	FLD0224	GGCTGTGATC	A	2.5	12270	12189	11287	none	11287	NA	NA	NA	v1-v1-55C-04_S16_L001_R1_001.fastq.gz
PRJNA1072695	v1-v23-45C-01	SAMN39749725	v1-v23	V2	DePCR	QB	45C	AP	1	FLD0225	TGGTGCTGGA	A	2.5	3678	3651	2327	none	2327	0.664644	NA	23.7618	v1-v23-45C-01_S65_L001_R1_001.fastq.gz
PRJNA1072695	v1-v23-45C-02	SAMN39749726	v1-v23	V2	DePCR	QB	45C	AP	2	FLD0226	TATGGTAAGG	A	2.5	2406	2387	1579	none	1579	0.677091	NA	17.8718	v1-v23-45C-02_S66_L001_R1_001.fastq.gz
PRJNA1072695	v1-v23-45C-03	SAMN39749727	v1-v23	V2	DePCR	QB	45C	AP	3	FLD0227	GTTCGATTGT	A	2.5	1047	1034	799	none	799	0.66995	NA	21.4555	v1-v23-45C-03_S67_L001_R1_001.fastq.gz
PRJNA1072695	v1-v23-45C-04	SAMN39749728	v1-v23	V2	DePCR	QB	45C	AP	4	FLD0228	GGTAGAATGA	A	2.5	2235	2225	1854	none	1854	0.677518	NA	17.6341	v1-v23-45C-04_S68_L001_R1_001.fastq.gz
PRJNA1072695	v1-v23-55C-01	SAMN39749729	v1-v23	V2	DePCR	QB	55C	AP	1	FLD0229	TTCTCATCGT	A	2.5	12552	12455	11379	none	11379	0.38708	NA	73.927	v1-v23-55C-01_S69_L001_R1_001.fastq.gz
PRJNA1072695	v1-v23-55C-02	SAMN39749730	v1-v23	V2	DePCR	QB	55C	AP	2	FLD0230	CTCAATCGTA	A	2.5	7064	7008	6280	none	6280	0.381781	NA	74.4819	v1-v23-55C-02_S70_L001_R1_001.fastq.gz
PRJNA1072695	v1-v23-55C-03	SAMN39749731	v1-v23	V2	DePCR	QB	55C	AP	3	FLD0231	CGCTAATGTA	A	2.5	14413	14320	13146	none	13146	0.386353	NA	74.0036	v1-v23-55C-03_S71_L001_R1_001.fastq.gz
PRJNA1072695	v1-v23-55C-04	SAMN39749732	v1-v23	V2	DePCR	QB	55C	AP	4	FLD0232	GCGTCTGAAT	A	2.5	12714	12612	11538	none	11538	0.39673	NA	72.8979	v1-v23-55C-04_S72_L001_R1_001.fastq.gz
PRJNA1072695	v1-v39-45C-01	SAMN39749733	v1-v39	V3	DePCR	QB	45C	AP	1	FLD0233	TTCTGTTGCC	A	2.5	1936	1894	1544	none	1544	0.665223	NA	23.5217	v1-v39-45C-01_S73_L001_R1_001.fastq.gz
PRJNA1072695	v1-v39-45C-02	SAMN39749734	v1-v39	V3	DePCR	QB	45C	AP	2	FLD0234	TTGTCCTTGC	A	2.5	584	572	438	none	438	0.676757	NA	18.0556	v1-v39-45C-02_S74_L001_R1_001.fastq.gz
PRJNA1072695	v1-v39-45C-03	SAMN39749735	v1-v39	V3	DePCR	QB	45C	AP	3	FLD0235	CCTGTGTAGA	A	2.5	1828	1774	1440	none	1440	0.658487	NA	26.1754	v1-v39-45C-03_S75_L001_R1_001.fastq.gz
PRJNA1072695	v1-v39-45C-04	SAMN39749736	v1-v39	V3	DePCR	QB	45C	AP	4	FLD0236	GATAAGAAGG	A	2.5	1207	1172	921	none	921	0.670621	NA	21.1454	v1-v39-45C-04_S76_L001_R1_001.fastq.gz
PRJNA1072695	v1-v39-55C-01	SAMN39749737	v1-v39	V3	DePCR	QB	55C	AP	1	FLD0237	CAGGTCACAT	A	2.5	13919	13825	12666	none	12666	0.417315	NA	70.6176	v1-v39-55C-01_S77_L001_R1_001.fastq.gz
PRJNA1072695	v1-v39-55C-02	SAMN39749738	v1-v39	V3	DePCR	QB	55C	AP	2	FLD0238	GCCATGTCAT	A	2.5	14749	14653	13456	none	13456	0.408194	NA	71.6426	v1-v39-55C-02_S78_L001_R1_001.fastq.gz
PRJNA1072695	v1-v39-55C-03	SAMN39749739	v1-v39	V3	DePCR	QB	55C	AP	3	FLD0239	TCTGCCTATA	A	2.5	6356	6305	5629	none	5629	0.406219	NA	71.8615	v1-v39-55C-03_S79_L001_R1_001.fastq.gz
PRJNA1072695	v1-v39-55C-04	SAMN39749740	v1-v39	V3	DePCR	QB	55C	AP	4	FLD0240	CTTAGTTCGC	A	2.5	1557	1536	1276	none	1276	0.529816	NA	55.538	v1-v39-55C-04_S80_L001_R1_001.fastq.gz
PRJNA1072695	v1-v4-45C-01	SAMN39749741	v1-v4	V5	DePCR	QB	45C	AP	1	FLD0241	CGTAATGAGC	A	2.5	1906	1895	1580	none	1580	0.585147	NA	45.6186	v1-v4-45C-01_S17_L001_R1_001.fastq.gz
PRJNA1072695	v1-v4-45C-02	SAMN39749742	v1-v4	V5	DePCR	QB	45C	AP	2	FLD0242	TTGCTTAGTC	A	2.5	2050	2032	1706	none	1706	0.584885	NA	45.6716	v1-v4-45C-02_S18_L001_R1_001.fastq.gz
PRJNA1072695	v1-v4-45C-03	SAMN39749743	v1-v4	V5	DePCR	QB	45C	AP	3	FLD0243	TCTTGTTCAC	A	2.5	1058	1049	822	none	822	0.563346	NA	49.8155	v1-v4-45C-03_S19_L001_R1_001.fastq.gz
PRJNA1072695	v1-v4-45C-04	SAMN39749744	v1-v4	V5	DePCR	QB	45C	AP	4	FLD0244	GTGGCTTCGT	A	2.5	1887	1875	1382	none	1382	0.580015	NA	46.647	v1-v4-45C-04_S20_L001_R1_001.fastq.gz
PRJNA1072695	v1-v4-55C-01	SAMN39749745	v1-v4	V5	DePCR	QB	55C	AP	1	FLD0245	TGTTCGATAG	A	2.5	12381	12306	11219	none	11219	0.304142	NA	81.8611	v1-v4-55C-01_S21_L001_R1_001.fastq.gz
PRJNA1072695	v1-v4-55C-02	SAMN39749746	v1-v4	V5	DePCR	QB	55C	AP	2	FLD0246	TCATTCAGTG	A	2.5	13943	13838	12723	none	12723	0.328256	NA	79.7101	v1-v4-55C-02_S22_L001_R1_001.fastq.gz
PRJNA1072695	v1-v4-55C-03	SAMN39749747	v1-v4	V5	DePCR	QB	55C	AP	3	FLD0247	GTGGAGAGCT	A	2.5	13690	13600	12506	none	12506	0.298146	NA	82.3778	v1-v4-55C-03_S23_L001_R1_001.fastq.gz
PRJNA1072695	v1-v4-55C-04	SAMN39749748	v1-v4	V5	DePCR	QB	55C	AP	4	FLD0248	GTAGAAGTGG	A	2.5	10269	10200	9318	none	9318	0.278332	NA	84.0358	v1-v4-55C-04_S24_L001_R1_001.fastq.gz
PRJNA1072695	v1-v55-45C-01	SAMN39749749	v1-v55	V1	DePCR	QB	45C	AP	1	FLD0249	TGGAGCATGT	A	2.5	1384	1373	1071	none	1071	0.675007	NA	18.9897	v1-v55-45C-01_S81_L001_R1_001.fastq.gz
PRJNA1072695	v1-v55-45C-02	SAMN39749750	v1-v55	V1	DePCR	QB	45C	AP	2	FLD0250	GAAGGAGATA	A	2.5	658	650	495	none	495	0.641969	NA	31.7172	v1-v55-45C-02_S82_L001_R1_001.fastq.gz
PRJNA1072695	v1-v55-45C-03	SAMN39749751	v1-v55	V1	DePCR	QB	45C	AP	3	FLD0251	CGAATGTATG	A	2.5	1548	1540	1253	none	1253	0.676417	NA	18.241	v1-v55-45C-03_S83_L001_R1_001.fastq.gz
PRJNA1072695	v1-v55-45C-04	SAMN39749752	v1-v55	V1	DePCR	QB	45C	AP	4	FLD0252	TCGTGAATGA	A	2.5	1566	1548	1223	none	1223	0.674324	NA	19.3416	v1-v55-45C-04_S84_L001_R1_001.fastq.gz
PRJNA1072695	v1-v55-55C-01	SAMN39749753	v1-v55	V1	DePCR	QB	55C	AP	1	FLD0253	GAATAGCTGA	A	2.5	1803	1768	1393	none	1393	0.583664	NA	45.9184	v1-v55-55C-01_S85_L001_R1_001.fastq.gz
PRJNA1072695	v1-v55-55C-02	SAMN39749754	v1-v55	V1	DePCR	QB	55C	AP	2	FLD0254	TTGTCACATC	A	2.5	12771	12683	11568	none	11568	0.416627	NA	70.6957	v1-v55-55C-02_S86_L001_R1_001.fastq.gz
PRJNA1072695	v1-v55-55C-03	SAMN39749755	v1-v55	V1	DePCR	QB	55C	AP	3	FLD0255	CTGGAGGCTA	A	2.5	4127	4095	3609	none	3609	0.434766	NA	68.5876	v1-v55-55C-03_S87_L001_R1_001.fastq.gz
PRJNA1072695	v1-v55-55C-04	SAMN39749756	v1-v55	V1	DePCR	QB	55C	AP	4	FLD0256	TGTCAGCTTA	A	2.5	1437	1429	1161	none	1161	0.581918	NA	46.2687	v1-v55-55C-04_S88_L001_R1_001.fastq.gz
PRJNA1072695	v1-v6-45C-01	SAMN39749757	v1-v6	V7	DePCR	QB	45C	AP	1	FLD0257	GTTCTTCGTA	A	2.5	511	504	376	none	376	0.231968	NA	87.6344	v1-v6-45C-01_S25_L001_R1_001.fastq.gz
PRJNA1072695	v1-v6-45C-02	SAMN39749758	v1-v6	V7	DePCR	QB	45C	AP	2	FLD0258	TCGCTGAACA	A	2.5	1287	1274	1012	none	1012	0.288432	NA	83.2	v1-v6-45C-02_S26_L001_R1_001.fastq.gz
PRJNA1072695	v1-v6-45C-03	SAMN39749759	v1-v6	V7	DePCR	QB	45C	AP	3	FLD0259	GTAGCCAGTA	A	2.5	1243	1235	1026	none	1026	0.31162	NA	81.2067	v1-v6-45C-03_S27_L001_R1_001.fastq.gz
PRJNA1072695	v1-v6-45C-04	SAMN39749760	v1-v6	V7	DePCR	QB	45C	AP	4	FLD0260	TGAGAAGGTA	A	2.5	1351	1341	1118	none	1118	0.293003	NA	82.8154	v1-v6-45C-04_S28_L001_R1_001.fastq.gz
PRJNA1072695	v1-v6-55C-01	SAMN39749761	v1-v6	V7	DePCR	QB	55C	AP	1	FLD0261	CCATATGATC	A	2.5	11003	10921	10088	none	10088	0.0531271	NA	98.1242	v1-v6-55C-01_S29_L001_R1_001.fastq.gz
PRJNA1072695	v1-v6-55C-02	SAMN39749762	v1-v6	V7	DePCR	QB	55C	AP	2	FLD0262	CGATCCTATA	A	2.5	11582	11487	10608	none	10608	0.0455755	NA	98.4422	v1-v6-55C-02_S30_L001_R1_001.fastq.gz
PRJNA1072695	v1-v6-55C-03	SAMN39749763	v1-v6	V7	DePCR	QB	55C	AP	3	FLD0263	TTCGAGCTAT	A	2.5	12518	12421	11441	none	11441	0.0537703	NA	98.0966	v1-v6-55C-03_S31_L001_R1_001.fastq.gz
PRJNA1072695	v1-v6-55C-04	SAMN39749764	v1-v6	V7	DePCR	QB	55C	AP	4	FLD0264	TAACTCTGCT	A	2.5	12924	12813	11852	none	11852	0.046153	NA	98.4183	v1-v6-55C-04_S32_L001_R1_001.fastq.gz
PRJNA1072695	v1-v7-45C-01	SAMN39749765	v1-v7	V9	DePCR	QB	45C	AP	1	FLD0265	TCGAATGTGC	A	2.5	1282	1270	844	none	844	0.276505	NA	84.1849	v1-v7-45C-01_S33_L001_R1_001.fastq.gz
PRJNA1072695	v1-v7-45C-02	SAMN39749766	v1-v7	V9	DePCR	QB	45C	AP	2	FLD0266	TTGCAGATCA	A	2.5	1575	1559	1311	none	1311	0.327812	NA	79.7508	v1-v7-45C-02_S34_L001_R1_001.fastq.gz
PRJNA1072695	v1-v7-45C-03	SAMN39749767	v1-v7	V9	DePCR	QB	45C	AP	3	FLD0267	GCGTTATTGC	A	2.5	1232	1217	1000	none	1000	0.301466	NA	82.0926	v1-v7-45C-03_S35_L001_R1_001.fastq.gz
PRJNA1072695	v1-v7-45C-04	SAMN39749768	v1-v7	V9	DePCR	QB	45C	AP	4	FLD0268	GAACTATCAC	A	2.5	1078	1073	888	none	888	0.330807	NA	79.4755	v1-v7-45C-04_S36_L001_R1_001.fastq.gz
PRJNA1072695	v1-v7-55C-01	SAMN39749769	v1-v7	V9	DePCR	QB	55C	AP	1	FLD0269	TCGAGGTACT	A	2.5	12754	12679	11663	none	11663	0.0580686	NA	97.9096	v1-v7-55C-01_S37_L001_R1_001.fastq.gz
PRJNA1072695	v1-v7-55C-02	SAMN39749770	v1-v7	V9	DePCR	QB	55C	AP	2	FLD0270	TGCGGATGGT	A	2.5	12761	12675	11731	none	11731	0.045741	NA	98.4353	v1-v7-55C-02_S38_L001_R1_001.fastq.gz
PRJNA1072695	v1-v7-55C-03	SAMN39749771	v1-v7	V9	DePCR	QB	55C	AP	3	FLD0271	GATCCTGAGC	A	2.5	11093	11007	10143	none	10143	0.0552256	NA	98.0337	v1-v7-55C-03_S39_L001_R1_001.fastq.gz
PRJNA1072695	v1-v7-55C-04	SAMN39749772	v1-v7	V9	DePCR	QB	55C	AP	4	FLD0272	GGTCTGGTGT	A	2.5	10782	10692	9848	none	9848	0.0488639	NA	98.3053	v1-v7-55C-04_S40_L001_R1_001.fastq.gz
PRJNA1072695	v1-v8-45C-01	SAMN39749773	v1-v8	V8	DePCR	QB	45C	AP	1	FLD0273	CTAAGTCATG	A	2.5	1680	1672	1380	none	1380	0.400162	NA	72.5258	v1-v8-45C-01_S41_L001_R1_001.fastq.gz
PRJNA1072695	v1-v8-45C-02	SAMN39749774	v1-v8	V8	DePCR	QB	45C	AP	2	FLD0274	GTCTTGGCTC	A	2.5	1461	1421	708	none	708	0.41958	NA	70.3593	v1-v8-45C-02_S42_L001_R1_001.fastq.gz
PRJNA1072695	v1-v8-45C-03	SAMN39749775	v1-v8	V8	DePCR	QB	45C	AP	3	FLD0275	CTGCGAATGT	A	2.5	2078	2040	1239	none	1239	0.390251	NA	73.5915	v1-v8-45C-03_S43_L001_R1_001.fastq.gz
PRJNA1072695	v1-v8-45C-04	SAMN39749776	v1-v8	V8	DePCR	QB	45C	AP	4	FLD0276	CTGTTCTAGC	A	2.5	1325	1311	1085	none	1085	0.436081	NA	68.4308	v1-v8-45C-04_S44_L001_R1_001.fastq.gz
PRJNA1072695	v1-v8-55C-01	SAMN39749777	v1-v8	V8	DePCR	QB	55C	AP	1	FLD0277	CACTTGTGTG	A	2.5	11063	10971	10101	none	10101	0.0757511	NA	97.1014	v1-v8-55C-01_S45_L001_R1_001.fastq.gz
PRJNA1072695	v1-v8-55C-02	SAMN39749778	v1-v8	V8	DePCR	QB	55C	AP	2	FLD0278	TGGATGACAT	A	2.5	9873	9805	8963	none	8963	0.06566	NA	97.5701	v1-v8-55C-02_S46_L001_R1_001.fastq.gz
PRJNA1072695	v1-v8-55C-03	SAMN39749779	v1-v8	V8	DePCR	QB	55C	AP	3	FLD0279	TTACGCAGTG	A	2.5	11807	11730	10793	none	10793	0.0717868	NA	97.2879	v1-v8-55C-03_S47_L001_R1_001.fastq.gz
PRJNA1072695	v1-v8-55C-04	SAMN39749780	v1-v8	V8	DePCR	QB	55C	AP	4	FLD0280	GTCGGTCTGA	A	2.5	10345	10271	9442	none	9442	0.0774755	NA	97.0194	v1-v8-55C-04_S48_L001_R1_001.fastq.gz
