# Supplementary material for: Quantitating primer-template interactions using deconstructed PCR
Source: PeerJ. 2024 Aug 8;12:e17787. doi: 10.7717/peerj.17787 (PMC11317036; doi:10.7717/peerj.17787)
Supplement: Table S6 [file peerj-12-17787-s008.xlsx]

## Sheet: Table S6 Summary
Current Name	Number of Templates	Templates Used	Pooling Ratio	Number of Primers used	Primer Name	Experimental Aim	Initial Name	Templates Used	Primer Name (806F_v1 to 806F_v64)
A01	1	ST0	Equimolar	1	V0	Evaluate the amplification viability of the primer‐template system.	A1	ST1	1
A10	1	ST0	Equimolar	10	V0-V9	Assess competition between perfect matching and 1 mismatch primers with single template. Assess effect of mismatch position on priming efficiency.	A2	ST1	1,4,6,7,8,11,15,23,39, 55
A09	1	ST0	Equimolar	9	V1-V9	Assess competition between 1 mismatch primers with single template	A3	ST1	4,6,7,8,11,15,23,39,5 5
A27	1	ST0	Equimolar	27	V10-V36	Assess competition between 2 mismatch primers with single template when no perfect or 1 mm match primers are available.	A4	ST1	2,3,5,9,10,1216,19,21,22,24,27,31,35,37,38,40,43,47,51,53,54,56,59,62
A64	1	ST0	Equimolar	64	V0-V63	Assess competition between 0, 1, 2 and 3 mismatch primers with single template. Assess effect of mismatch position on priming efficiency.	A6	ST1	1‐64
B01	10	ST0-ST9	Equimolar	1	V0	Assess ability of single primer to amplify 10 templates, including a template perfectly matching, as well as 9	B1	ST1, ST4, ST6, ST7, ST8, ST11, ST15, ST23, ST39, ST55	1
B10	10	ST0-ST9	Equimolar	10	V0-V9	Assess ability of 10 primers to amplify 10 templates where each primer perfectly matches one of the templates. Determine whether perfect match amplification dominates, and whether annealing temperature plays a role. Assess effect of mismatch position on priming efficiency.	B2	ST1, ST4, ST6, ST7, ST8, ST11, ST15, ST23, ST39, ST55	1,4,6,7,8,11,15,23,39, 55
B09	10	ST0-ST9	Equimolar	9	V1-V9	Assess effect of removing one primer from amplification of a pool of 10 templates. 9 templates have perfectly matching primers, 1 template has no perfectly matching primers. Assess effect of mismatch position on priming efficiency.	B3	ST1, ST4, ST6, ST7, ST8, ST11, ST15, ST23, ST39, ST55	4,6,7,8,11,15,23,39,5 5
B27	10	ST0-ST9	Equimolar	27	V10-V36	Assess effect of removing perfect matching primers on amplification of 10 templates. Assess effect of mismatch position on priming efficiency.	B4	ST1, ST4, ST6, ST7, ST8, ST11, ST15, ST23, ST39, ST55	2,3,5,9,10,1216,19,21,22,24,27,31,
C01	10	ST0-ST9	0.1/1/1/1/1/1 /1/1/1/1	1	V0	Assess effect of template concentration on ability of single primer to amplify 10 templates. The primer perfectly matches the low abundant template. Assess effect of mismatch position on priming efficiency.	C1	ST1, ST4, ST6, ST7, ST8, ST11, ST15, ST23, ST39, ST55	1
C10	10	ST0-ST9	0.1/1/1/1/1/1 /1/1/1/1	10	V0-V9	Assess effect of template concentration on ability of 10 primer pool to amplify 10 templates. Assess effect of mismatch position on priming efficiency.	C2	ST1, ST4, ST6, ST7, ST8, ST11, ST15, ST23, ST39, ST55	1,4,6,7,8,11,15,23,39, 55
C09	10	ST0-ST9	0.1/1/1/1/1/1 /1/1/1/1	9	V1-V9	Assess effect of template concentration on ability of 9 primer pool to amplify 10 templates. Missing perfect match primer targets the low abundance template. Assess effect of mismatch position on priming efficiency.	C3	ST1, ST4, ST6, ST7, ST8, ST11, ST15, ST23, ST39, ST55	4,6,7,8,11,15,23,39,5 5
D01	4	ST0, ST7, ST9, ST8	1/2/4/8	1	V0	Assess effect of more dynamic distribution of template abundance, and amplification with single primer. Single primer perfectly matches lowest abundance template and has 3' mismatches with the other three templates; Assess effect of mismatch sequence on priming efficiency.	D1	ST1, ST6, ST7, ST8	1
D10	4	ST0, ST7 ,ST9, ST8	1/2/4/8	10	V0-V9	Assess effect of more dynamic distribution of template abundance, and amplification with 10 primer pool. Three templates chosen have a single mismatch at the 3' location relative to the lowest abundance template. Assess effect of mismatch sequence on priming efficiency.	D2	ST1, ST6, ST7, ST8	1,4,6,7,8,11,15,23,39, 55
E01	4	ST0, ST5, ST4, ST6	1/2/4/8	1	V0	Assess effect of more dynamic distribution of template abundance, and amplification with single primer. Single primer perfectly matches lowest abundance template and has middle mismatches with the other three templates; Assess effect of mismatch sequence on priming efficiency.	E1	ST1, ST4, ST11, ST15	1
E10	4	ST0, ST5, ST4, ST6	1/2/4/8	10	V0-V9	Assess effect of more dynamic distribution of template abundance, and amplification with 10 primer pool. Three templates chosen have a single mismatch at the middle mismatch location relative to the lowest abundance template. Assess effect of mismatch sequence on priming efficiency.	E2	ST1, ST4, ST11, ST15	1,4,6,7,8,11,15,23,39, 55
A1	1	ST0	Equimolar	1	V0	Assess the effect of polymerase errors on the primer-template interaction data. We repeated some experiments with proof-reading polymerases and primers containing phosphorothioate linkages to prevent polymerase exonuclease activity on the primers themselves. We compared the sequence reads to the known template. Mismatches were considered errors.
A+	1	ST0	Equimolar	10	V0-V9	Assess the impact of mismatch position on single template amplification in head-to-head competition between two primers. V0 was put up against each of V1-V9 to look at differential amplification due to mismatch location and base pairings at thos locations.
